# Supplementary material for: Using transcriptome sequencing (RNA-Seq) to screen genes involved in β-glucan biosynthesis and accumulation during oat seed development
Source: PeerJ. 2024 Sep 25;12:e17804. doi: 10.7717/peerj.17804 (PMC11438436; doi:10.7717/peerj.17804)
Supplement: Supplemental Information 5 [file peerj-12-17804-s005.xlsx]

## Sheet: Sheet2
NUMBER	content(%)	NAME
1	5.57	BY
2	5.027	2002 33-8-3-13-2
3	5.005	OA1372-15
4	4.986	F3-5-20
5	4.947	30
6	4.556	7
7	4.482	2019-04-01
8	4.473	F3-5-42
9	4.442	F3-5-44
10	4.414	Ca86
11	4.395	44
12	4.39	2014 34-36
13	4.384	YK1
14	4.364	18
15	4.359	KY2
16	4.353	2009 10-13-4
17	4.35	F3-5-10
18	4.33	H9-121
19	4.325	V9
20	4.31138	YK2
21	4.295	F3-5-29
22	4.28	2014 65-5
23	4.279	69
24	4.236	2019-03-01
25	4.185	43
26	4.184	1961-09-01
27	4.152	NMD1
28	4.152	F3-5-22
29	4.135	ZY8
30	4.133	MY3
31	4.112	2
32	4.108	15
33	4.108	F3-5-15
34	4.069	JY18
35	4.064	BY15
36	4.049	OA1562-2
37	4.04362	QYI
38	4.038	P5
39	4.007	BY1
40	4	ZY1
41	3.991	QY2
42	3.962	34
43	3.952	75
44	3.922	BY2
45	3.92	2019-01-01
46	3.891	11
47	3.869	ZY7
48	3.867	OA1365-3-1
49	3.837	MNDY1
50	3.829	BY5
51	3.821	F3-5-17
52	3.813	79
53	3.81182	BPGD
54	3.795	YK1
55	3.787	ZY13
56	3.761	2
57	3.759	2011 23-12-2-3-2
58	3.659	2014 51-61
59	3.647	BY8
60	3.638	LZ
61	3.624	OA1365-2-1（皮）
62	3.612	BY8
63	3.499	41
64	3.49	F3-5-19
65	3.483	2012-35-14-2
66	3.459	2014 67-10
67	3.459	60
68	3.43368	QH444
69	3.432	Able-Mozart
70	3.425	HZ2
71	3.42	BY7
72	3.41	DY1
73	3.39463	BIA
74	3.393	ZY14
75	3.336	Y2006
76	3.331	F3-5-12
77	3.328	MNDY2
78	3.285	BY8
79	3.24748	BY19
80	3.23074	N-10
81	3.204	2019-02-01
82	3.1662	72
83	3.12599	QY12
84	3.09324	BY14
85	3.077	BY12
86	3.06082	V8
87	3.01084	N-3
88	2.98918	BL
89	2.97355	TY2
90	2.97189	Hagwire
91	2.94917	JY9
92	2.92826	N-2
93	2.926	BY6
94	2.914	AR
95	2.878	MC
96	2.86822	JY7
97	2.844	PGD20
98	2.84035	AT
99	2.82592	MNK
100	2.81161	LN
101	2.77443	V14
102	2.73422	G138
103	2.726	2014 15-13
104	2.6777	MW
105	2.648	SE37
106	2.64566	JY2
107	2.63936	KBK
108	2.60286	BY9
109	2.59419	QHTYM
110	2.5797	ZY14
111	2.54173	GL381
112	2.53273	KONA
113	2.52159	MND1
114	2.50067	MY1
115	2.40633	LY3
116	2.39067	H44
117	2.37925	NY5）
118	2.36297	G144
119	2.2896	CY1
120	2.2589	V3
121	2.25847	G113
122	2.20104	TYM
123	2.16206	SP
124	2.15822	G142
125	2.11806	BY3
126	2.07146	BY4
127	2.05338	DY2
128	2.05153	70
129	2.03779	MT
130	2.029	DY
