# Supplementary material for: Using transcriptome sequencing (RNA-Seq) to screen genes involved in β-glucan biosynthesis and accumulation during oat seed development
Source: PeerJ. 2024 Sep 25;12:e17804. doi: 10.7717/peerj.17804 (PMC11438436; doi:10.7717/peerj.17804)
Supplement: Supplemental Information 6 [file peerj-12-17804-s006.xlsx]

## Sheet: Sheet1
Sample	Concentration（ng/μL）	A260/A230	A260/A280
BY1-1	253	2.32	2.06
BY1-2	361	2.2	1.92
BY1-3	345	2.25	1.95
BY2-1	318	2.24	1.81
BY2-2	232	2.43	1.94
BY2-3	474	2.27	2.03
BY3-1	416	2.21	1.82
BY3-2	427	2.34	2.03
BY3-3	298	2.37	2.02
BY4-1	217	2.05	1.89
BY4-2	126	2.44	1.99
BY4-3	199	2.26	1.94
BY5-1	408	2.35	2.07
BY5-2	110	2.21	2.03
BY5-3	168	2.3	1.84
DY1-1	325	2.26	1.91
DY1-2	386	2.26	1.91
DY1-3	478	2.25	1.98
DY2-1	220	2.34	2.07
DY2-2	252	2.3	2.06
DY2-3	318	2.41	1.92
DY3-1	175	2.02	1.88
DY3-2	180	2.34	1.89
DY3-3	142	2.27	1.94
DY4-1	127	2.19	2.03
DY4-2	131	2.34	2.04
DY4-3	100	2.07	2.09
DY5-1	175	2.37	1.97
DY5-2	89	2.19	1.94
DY5-3	121	2.03	1.87
