# Supplementary material for: Using transcriptome sequencing (RNA-Seq) to screen genes involved in β-glucan biosynthesis and accumulation during oat seed development
Source: PeerJ. 2024 Sep 25;12:e17804. doi: 10.7717/peerj.17804 (PMC11438436; doi:10.7717/peerj.17804)
Supplement: Supplemental Information 7 [file peerj-12-17804-s007.xlsx]

## Sheet:  primer
Gene	sequence	Forward Primers（5‘-3’）	Reverse Primers（5‘-3’）	Amplicon（bp）
Actin	>KP257585.1 Avena sativa actin mRNA, partial cds GAGACCTTCAATGTTCCAGCCATGTATGTTGCCATCCAGGCTGTGCTTTCCCTCTATGCTAGTGGACGTA CAACAGGTATTGTGTTGGATTCTGGTGATGGTGTCAGCCATACCGTGCCAATCTATGAAGGATATGCCCT TCCGCATGCCATCCTTCGTCTTGACCTCGCTGGACGTGACTTAACTGACTGCTTGATGAAGATTCTTACC GAGAGAGGTTACTCCTTCACCACCACTGCCGAGCGGGAAATTGTAAGGGACATCAAGGAGAAGCTCGCAT ATGTGGCTCTTGACTATGAACAGGAGCTGGAGAATGCCAAGAGCAGCTCCTCTGTGGAGAAGAGCT…	TGCCATCCTTCGTCTTGACC	GGCATTCTCCAGCTCCTGTT	172
Pepsico1_Contig2899	>Pepsico1_Contig2899.path1 ACAGCAGCCAGAGAGAGAGAGAGAAAGGCAGACACTCACTCGGCGAGAGACCAATGGAGGGTGGTCGTCGTTGCTCGCCGTGGACCAGGTTGCCAGCGCTGCTGCTGGCCTGCGCCGCCTCCGTACGCGTGGGGGAGTGCAGGGTGGTGCACGTGGGAGAGGCGCACCGGAGGAGCATGCTGGCCAATGGCCTCGGCTCCACTCCACCCATGGGGTGGAACAGCTGGAATCACTTCGCGTGCGACGGCAACGGCGAGGTTGTCATCAAGGAGACCGCCGATGCGCTTGTCTCCACCGGGCTCGCAGCCGCGGGCTACAAATACGTCAATCTTGATGATTGCTGGGCAGAACCCGAACGTGATGCCAAGGGCA…	ACAAGAAGACGTTCCCCCAC	GCGAATGTTTTGGCGTCCTT	157
Pepsico2_Contig10389	>Pepsico2_Contig10389.path1 AATTCACAGCGTCCGGAGCTGGAGCCTCCTCCTTCTCTTCTTTCCCAGCCCAGTCTCTTTCCCCTTCTCCACACTTCCCTTCGCTTCGCTCCTCCTAGCCGAATTTTTTAAACCTCCATCTGACCACCTCCCTCGTCGGCTTCTGCCTTCCTATCTCAGAGGCCTAGTAACGCGCGAGACCCAGACCGGGAGTTCTCTGATGGCGTCTCACATCATTCTGCCCAAGGAGGAGGAGGAGGAGCAGGAGGCGGGGCACGGCGTGGCCGAGGCGGACCACGGCTCGCCGCCGGAGCCGCGGGGGTACCGGCACATGGAGACGGCCCCGAAGCCGCTCCCGTTCTCGGCCACGTGCGTGCGGATCTCCCGCGACT…	GCACCTCACCGATTACCTCC	GCACGACGGAAATGAACACC	165
TRINITY_DN14979	>TRINITY_DN14979_c0_g1_i6.path1 CGACATGCGCGCCGGGCTCGCCGCGGACGGCGCCGCCGAGCTCAAGATGATCCCCAGCTACGTCTACTCCCTCCCCACTGGGGATGAGACGGGGCTGTTCTATGCCCTGGATCTTGGAGGCACCAACTTCAGAGTGCTCAGGGTGCAGCTGGGAGGAAAAGACAGGCGTGTAGTCGACAGCGAGTCCGAGCAAGTGTCCATCCCGAAAGAGATCATGCATGGTACAACCGAGGAGTTGTTCGATTTCATCGCGGCCCGCCTTTCGAGATTCGTGGCGACGGAGGGCGGTAACTTTCGTCTTCAGGAAGGTAGAAAGAGAGAGATTGGTTTTACCTTCTCCTTTCCGGTAAAGCAAACTTCTATCGAC…	CTCTGGAACTGCTGGGAAGG	CCGGTGCCCAAAATAACTGC	165
TRINITY_DN34252	>TRINITY_DN34252_c0_g1_i1.path1 CAGCAACATGCAGCATGTCACCTCCATTTCGTTCCTGCTCCTCACCTATGCCAAGTACCTCTCCAAGACCTCTCACACTGTCAACTGTGGGGACATTTCAGTTGGTCCAGACACTCTTCGGCTGCAAGCCAAAAAGCAGGTCGACTATCTGTTAGGAGACAACCCGATGAAAATGTCGTACATGGTCGGGTACGGCGACCGGTATCCTCA	TTCCTGCTCCTCACCTATGC	CAGCCGAAGAGTGTCTGGAC	93
TRINITY_DN98880	>TRINITY_DN98880_c0_g1_i1.path1 GGTGGTGATGGCCATAAATGTGGACACTATCGGTACCACGGTGGGGAAGGCGATCGCCGAGAAATGGCCAGCTGCAAAGATCGCCCAGGCAACGACTGGTCTGCTCTTCAATGTGTGGATGTTGTTTCTGCTCTACCCGTTCGCCCTTGGGGTCATAGGGCACTAGAGCAAGAGGCCCTACGTCCTCTTCGGTCGGCTCTTGTTCGCAGTCGCTTCCGTCACATCCGTGTACATTGCCCTCGCCGGTGCCGTGCTTCCGTTTGGGATATTATTTGCTCTACTTACATGTAAGGTAT	TGTTGTTTCTGCTCTACCCGT	GGATGTGACGGAAGCGACT	107
TRINITY_DN34723	>TRINITY_DN34723_c0_g1_i1.path1 TGGTTGGGTATGGGGACAGGTACCCGCTGCAGCCGCACCACCGCGGCGCGTCGCTGCCGTCCATCAACGCCAACCCGGCGAAGATCACCTGCAGCGAGGGAAACAACTACTTCCACAGGCCTGGACCCAACTCCAATGTGATCGAGGGCGCCATCGTCGGAGGCCCTGACGCCAACGACCATTACAACGATTCTCGGGAAAATTACA	TGGGTATGGGGACAGGTA	CCCGAGAATCGTTGTAATG	187
Pepsico1_Contig10341	>Pepsico1_Contig10341.path1 GTCAACGGCACCTCCCTCGGCCGCAGCTTCCGAAGTTTCGCCCCACCCCCTCACAACTCACAAGCAACTCACAGCGGGGGCGCGCGCACACACGCTCGGCTTGCTCCTGCGCCGCCGCCGCCGCCGGGAATGGGGAGCACGGGTCGCAGCGGCGAGGCGGCGGGTGAGGTGACCCGTGCCGACTTCCCCGAGGGGTTCGTCTTCGGCGTCGCCACCTCCGCCTACCAGATTGAGGGGGCGAGAAACGAGGGTGGCAAAGGCGATAGCATATGGGATGTATTTGCAGATAAAAAAGAACATATCCTAGACGGAAGCTCCGGAGAAGTTGCAGTTGATCATTACCATCGATACAAGGAAGACATTGAGCTCAT…	TTACGCAACTCTGTATCACTG	CGCATAACCACTAAGGGA	194
