# Supplementary material for: Using transcriptome sequencing (RNA-Seq) to screen genes involved in β-glucan biosynthesis and accumulation during oat seed development
Source: PeerJ. 2024 Sep 25;12:e17804. doi: 10.7717/peerj.17804 (PMC11438436; doi:10.7717/peerj.17804)
Supplement: Supplemental Information 8 [file peerj-12-17804-s008.xlsx]

## Sheet: Sheet1
content of β- Glucan								accumulation rate of β- Glucan
DY	1d	6d	11d	16d	21d	26d			1-6d	6-11d	11-16d	16-21d	21-26d
1	0.183	0.222	0.809	1.655	1.84	2.03		DY	0.0092	0.1172	0.1686	0.0964	0.0382
2	0.178	0.233	0.811	1.659	1.835	2.035		BY	0.0424	0.2934	0.4528	0.169	0.0798
3	0.183	0.23	0.812	1.662	1.834	2.024
4	0.18	0.224	0.821	1.649	1.842	2.028
mean value	0.181	0.227	0.813	1.656	1.838	2.029
BY	1d	6d	11d	16d	21d	26d
1	0.225	0.435	1.908	4.173	5.012	5.425
2	0.229	0.444	1.904	4.165	5.029	5.403
3	0.221	0.44	1.911	4.172	5.006	5.417
4	0.234	0.436	1.902	4.169	5.014	5.41
mean value	0.227	0.439	1.906	4.17	5.015	5.414
