# Supplementary material for: Using transcriptome sequencing (RNA-Seq) to screen genes involved in β-glucan biosynthesis and accumulation during oat seed development
Source: PeerJ. 2024 Sep 25;12:e17804. doi: 10.7717/peerj.17804 (PMC11438436; doi:10.7717/peerj.17804)
Supplement: Supplemental Information 9 [file peerj-12-17804-s009.xlsx]

## Sheet: all DEGs
BY1vsDY1	BY2vsDY2	BY3vsDY3	BY4vsDY4	BY5vsDY5
Pepsico2_Contig14530.path1	Pepsico2_Contig14530.path1	TRINITY_DN80635_c0_g1_i1.path1	Pepsico2_Contig14530.path1	TRINITY_DN80635_c0_g1_i1.path1
Pepsico1_Contig838.path1	TRINITY_DN22767_c0_g1_i1.path2	TRINITY_DN22767_c0_g1_i1.path2	Pepsico1_Contig2161.path1	TRINITY_DN22767_c0_g1_i1.path2
TRINITY_DN497_c0_g1_i2.path1	Pepsico1_Contig838.path1	Pepsico2_Contig19816.path1	Pepsico2_Contig19816.path1	novel.7423
TRINITY_DN80635_c0_g1_i1.path1	novel.4050	Pepsico1_Contig838.path1	TRINITY_DN80635_c0_g1_i1.path1	TRINITY_DN8148_c0_g1_i1.path2
novel.6646	Pepsico2_Contig19535.path1	Pepsico2_Contig14530.path1	novel.7423	novel.751
TRINITY_DN3201_c0_g1_i4.path1	Pepsico1_Contig7260.path2	TRINITY_DN1462_c0_g4_i1.path1	TRINITY_DN10470_c0_g1_i2.path1	Pepsico2_Contig14530.path1
novel.5269	Pepsico1_Contig6915.path1	Pepsico1_Contig6915.path1	novel.6653	Pepsico1_Contig5243.path1
Pepsico2_Contig19672.path3	TRINITY_DN1843_c0_g1_i4.path1	TRINITY_DN8148_c0_g1_i1.path2	TRINITY_DN22767_c0_g1_i1.path2	novel.6653
TRINITY_DN1412_c0_g1_i1.path1	novel.751	TRINITY_DN497_c0_g1_i2.path1	Pepsico2_Contig19104.path1	Pepsico1_Contig838.path1
Pepsico2_Contig19816.path1	novel.5269	novel.6646	TRINITY_DN393_c0_g1_i1.path1	TRINITY_DN27290_c0_g1_i1.path1
novel.301	TRINITY_DN497_c0_g1_i2.path1	Pepsico2_Contig19104.path1	Pepsico2_Contig17727.path1	TRINITY_DN6144_c0_g2_i2.path2
TRINITY_DN10545_c0_g1_i3.path1	Pepsico2_Contig8726.path1	Pepsico1_Contig7260.path2	TRINITY_DN31076_c0_g1_i4.path2	TRINITY_DN69_c1_g1_i1.path4
Pepsico1_Contig27806.path1	Pepsico1_Contig34345.path1	novel.5269	novel.751	TRINITY_DN497_c0_g1_i2.path1
novel.8751	TRINITY_DN8148_c0_g1_i1.path2	novel.8026	TRINITY_DN8148_c0_g1_i1.path2	novel.1687
novel.9909	novel.8026	novel.317	TRINITY_DN27339_c0_g1_i1.path1	novel.8026
Pepsico1_Contig34345.path1	novel.301	Pepsico2_Contig2152.path1	Pepsico2_Contig14932.path1	novel.317
novel.10331	Pepsico2_Contig7908.path1	TRINITY_DN3469_c0_g1_i3.path1	TRINITY_DN497_c0_g1_i2.path1	Pepsico2_Contig19816.path1
novel.7503	Pepsico1_Contig1188.path2	Pepsico1_Contig1188.path2	novel.7494	novel.6646
Pepsico2_Contig7908.path1	TRINITY_DN1004_c0_g1_i1.path1	Pepsico2_Contig12395.path1	Pepsico2_Contig6205.path1	novel.9793
TRINITY_DN22767_c0_g1_i1.path2	novel.2589	TRINITY_DN2977_c0_g1_i11.path1	novel.4347	novel.4758
novel.316	novel.8751	TRINITY_DN10470_c0_g1_i2.path1	novel.5269	novel.8751
Pepsico1_Contig2960.path1	Pepsico2_Contig12395.path1	TRINITY_DN33186_c0_g2_i1.path1	novel.9878	novel.7503
novel.2852	Pepsico2_Contig20783.path1	Pepsico2_Contig7908.path1	TRINITY_DN1843_c0_g1_i4.path1	TRINITY_DN1004_c0_g1_i1.path1
TRINITY_DN1004_c0_g1_i1.path1	novel.6646	TRINITY_DN19850_c0_g1_i11.path2	Pepsico1_Contig883.path1	novel.301
TRINITY_DN8779_c0_g2_i3.path2	TRINITY_DN11760_c0_g1_i2.path1	Pepsico1_Contig38.path2	novel.6646	novel.2589
TRINITY_DN107613_c0_g1_i1.path1	TRINITY_DN19850_c0_g1_i11.path2	TRINITY_DN28508_c0_g1_i6.path1	Pepsico1_Contig896.path1	TRINITY_DN107613_c0_g1_i1.path1
TRINITY_DN69_c1_g2_i2.path1	TRINITY_DN33186_c0_g2_i1.path1	Pepsico2_Contig1861.path1	TRINITY_DN12913_c0_g1_i2.path2	Pepsico1_Contig5522.path4
Pepsico1_Contig6915.path1	novel.2953	novel.301	Pepsico2_Contig16877.path1	Pepsico2_Contig14668.path1
TRINITY_DN10594_c0_g1_i4.path2	TRINITY_DN28508_c0_g1_i6.path1	Pepsico2_Contig16992.path1	TRINITY_DN1412_c0_g1_i1.path1	novel.9878
TRINITY_DN2977_c0_g1_i11.path1	novel.8593	Pepsico2_Contig19535.path1	novel.10175	Pepsico2_Contig20783.path1
TRINITY_DN8645_c0_g1_i16.path1	Pepsico1_Contig1181.path2	Pepsico1_Contig36309.path2	Pepsico2_Contig19535.path1	Pepsico2_Contig1861.path1
TRINITY_DN323_c0_g1_i2.path1	Pepsico2_Contig11265.path1	TRINITY_DN1004_c0_g1_i1.path1	Pepsico2_Contig8992.path1	Pepsico1_Contig4611.path1
TRINITY_DN34912_c0_g1_i2.path1	TRINITY_DN61132_c0_g1_i1.path1	Pepsico2_Contig8.path1	Pepsico1_Contig34345.path1	TRINITY_DN22077_c0_g1_i12.path2
TRINITY_DN69_c1_g1_i1.path3	Pepsico2_Contig1861.path1	Pepsico1_Contig3100.path2	Pepsico2_Contig12395.path1	Pepsico1_Contig37863.path1
TRINITY_DN31113_c0_g3_i2.path1	novel.1361	novel.8452	Pepsico2_Contig17603.path1	TRINITY_DN69_c1_g1_i1.path3
Pepsico1_Contig4492.path1	TRINITY_DN2977_c0_g1_i11.path1	novel.8751	TRINITY_DN5942_c1_g1_i4.path1	TRINITY_DN25384_c0_g2_i1.path1
TRINITY_DN5482_c0_g1_i1.path1	novel.9622	Pepsico2_Contig9370.path1	Pepsico1_Contig38.path2	TRINITY_DN3201_c0_g1_i4.path1
TRINITY_DN10665_c0_g1_i2.path1	novel.8	novel.1361	TRINITY_DN46636_c0_g1_i1.path1	TRINITY_DN1412_c0_g1_i1.path1
novel.1361	Pepsico1_Contig1046.path1	TRINITY_DN107613_c0_g1_i1.path1	TRINITY_DN3469_c0_g1_i3.path1	TRINITY_DN19850_c0_g1_i11.path2
novel.6907	TRINITY_DN323_c0_g1_i2.path1	Pepsico2_Contig15428.path1	novel.6184	TRINITY_DN33186_c0_g2_i1.path1
novel.8452	novel.7503	novel.6233	Pepsico2_Contig16947.path1	TRINITY_DN4456_c0_g2_i10.path4
TRINITY_DN6144_c0_g2_i2.path2	Pepsico2_Contig19444.path1	novel.2953	Pepsico2_Contig13659.path1	Pepsico1_Contig27196.path1
Pepsico2_Contig12395.path1	novel.10331	novel.2852	Pepsico1_Contig7725.path1	Pepsico2_Contig12405.path1
Pepsico2_Contig14131.path1	novel.5275	TRINITY_DN25186_c0_g1_i1.path3	novel.8026	novel.10567
novel.897	novel.317	Pepsico1_Contig34345.path1	Pepsico2_Contig17568.path1	novel.5747
Pepsico1_Contig672.path2	TRINITY_DN1412_c0_g1_i1.path1	novel.4536	novel.1413	novel.10331
novel.8	Pepsico1_Contig5522.path4	Pepsico1_Contig5243.path1	Pepsico1_Contig37105.path1	novel.4532
TRINITY_DN12381_c0_g2_i1.path1	Pepsico2_Contig15428.path1	novel.7098	Pepsico2_Contig19239.path1	TRINITY_DN10594_c0_g1_i4.path1
novel.10175	TRINITY_DN24_c2_g1_i1.path1	TRINITY_DN24_c2_g1_i1.path1	Pepsico2_Contig19157.path1	TRINITY_DN2389_c0_g1_i4.path1
TRINITY_DN10081_c0_g1_i2.path1	novel.2989	Pepsico1_Contig4492.path1	Pepsico1_Contig27196.path1	TRINITY_DN1146_c0_g1_i1.path1
novel.6233	TRINITY_DN69_c1_g1_i1.path3	Pepsico2_Contig17380.path1	Pepsico2_Contig7831.path2	Pepsico2_Contig3093.path2
novel.2978	TRINITY_DN107613_c0_g1_i1.path1	Pepsico1_Contig585.path1	novel.7686	TRINITY_DN35472_c2_g1_i1.path1
Pepsico2_Contig16302.path2	novel.8452	novel.6221	Pepsico2_Contig15327.path1	novel.9882
TRINITY_DN8645_c0_g1_i16.path2	novel.2852	Pepsico1_Contig1181.path2	TRINITY_DN8726_c0_g1_i2.path1	novel.7686
Pepsico2_Contig1861.path1	novel.10104	TRINITY_DN1502_c0_g1_i2.path1	TRINITY_DN7068_c0_g1_i5.path1	novel.7600
novel.2989	Pepsico2_Contig12819.path1	Pepsico2_Contig13838.path2	TRINITY_DN5199_c0_g2_i1.path1	Pepsico1_Contig3350.path1
Pepsico2_Contig14131.path2	novel.316	novel.897	TRINITY_DN8330_c1_g3_i2.path1	novel.2796
TRINITY_DN35472_c2_g1_i1.path1	novel.897	TRINITY_DN6144_c0_g2_i2.path2	TRINITY_DN20401_c0_g2_i1.path1	Pepsico2_Contig2152.path1
novel.2520	TRINITY_DN10470_c0_g1_i2.path1	TRINITY_DN14220_c0_g2_i6.path1	Pepsico1_Contig1181.path2	novel.8920
Pepsico2_Contig3599.path1	Pepsico2_Contig3093.path2	Pepsico1_Contig7725.path1	novel.656	TRINITY_DN11134_c0_g1_i14.path1
novel.5275	Pepsico2_Contig20185.path1	novel.316	TRINITY_DN19850_c0_g1_i11.path2	novel.3230
novel.2531	novel.7686	novel.9846	Pepsico2_Contig7439.path1	TRINITY_DN10594_c0_g1_i4.path2
novel.8929	Pepsico2_Contig11289.path2	TRINITY_DN1502_c0_g4_i1.path1	TRINITY_DN6144_c0_g2_i2.path2	TRINITY_DN4576_c0_g2_i2.path1
novel.4967	Pepsico1_Contig4492.path1	novel.8361	novel.8257	novel.7988
novel.4544	novel.6233	Pepsico2_Contig15229.path2	TRINITY_DN69_c1_g1_i1.path4	Pepsico1_Contig8205.path2
novel.8026	Pepsico2_Contig16992.path1	Pepsico2_Contig19672.path3	novel.8452	TRINITY_DN22830_c0_g2_i1.path1
Pepsico1_Contig2933.path1	TRINITY_DN10594_c0_g1_i4.path1	TRINITY_DN4708_c1_g1_i2.path1	TRINITY_DN4449_c0_g3_i2.path2	TRINITY_DN21589_c1_g1_i1.path1
Pepsico2_Contig12871.path3	novel.7924	TRINITY_DN15163_c0_g1_i1.path1	TRINITY_DN4108_c0_g1_i5.path1	TRINITY_DN4708_c1_g1_i2.path1
TRINITY_DN33878_c0_g1_i2.path1	Pepsico2_Contig2921.path1	novel.2589	Pepsico1_Contig6915.path1	novel.2520
TRINITY_DN25530_c0_g1_i1.path1	Pepsico2_Contig17521.path1	novel.10331	novel.2589	TRINITY_DN12913_c0_g1_i2.path2
TRINITY_DN78620_c0_g1_i1.path1	TRINITY_DN15163_c0_g1_i1.path1	TRINITY_DN15073_c0_g1_i2.path1	novel.4758	TRINITY_DN4027_c0_g2_i1.path1
TRINITY_DN28508_c0_g1_i6.path1	Pepsico2_Contig16302.path2	novel.8593	Pepsico1_Contig5243.path1	TRINITY_DN2977_c0_g1_i11.path1
Pepsico2_Contig16720.path1	TRINITY_DN8751_c0_g1_i3.path1	TRINITY_DN1843_c0_g1_i4.path1	novel.3627	novel.897
novel.7600	TRINITY_DN1502_c0_g1_i2.path1	novel.5604	Pepsico2_Contig20783.path1	TRINITY_DN553_c0_g2_i1.path1
Pepsico2_Contig11468.path1	novel.10567	TRINITY_DN35472_c2_g1_i1.path1	TRINITY_DN1004_c0_g1_i1.path1	TRINITY_DN1030_c0_g1_i11.path1
TRINITY_DN10626_c0_g1_i1.path1	TRINITY_DN73349_c0_g1_i1.path1	novel.5717	Pepsico2_Contig12367.path2	novel.4544
novel.4050	Pepsico1_Contig36309.path2	novel.4544	Pepsico2_Contig9320.path1	TRINITY_DN25186_c0_g1_i1.path3
TRINITY_DN13415_c0_g3_i3.path1	TRINITY_DN13168_c0_g1_i1.path1	TRINITY_DN38303_c0_g1_i2.path1	novel.307	TRINITY_DN34205_c0_g1_i1.path1
novel.4536	Pepsico1_Contig1451.path2	novel.4532	TRINITY_DN10802_c0_g1_i1.path2	novel.6930
novel.1283	novel.6041	novel.9622	TRINITY_DN1446_c0_g1_i1.path2	novel.4538
TRINITY_DN18390_c0_g1_i1.path1	novel.9245	novel.6041	novel.2953	TRINITY_DN78620_c0_g1_i1.path1
TRINITY_DN21589_c1_g1_i1.path1	novel.8361	novel.6752	Pepsico1_Contig6482.path2	novel.2531
TRINITY_DN4027_c0_g2_i1.path1	novel.4536	novel.10567	novel.5747	Pepsico2_Contig14412.path3
novel.10104	TRINITY_DN10594_c0_g1_i4.path2	TRINITY_DN38626_c0_g3_i1.path1	novel.7326	Pepsico1_Contig6915.path1
novel.7301	TRINITY_DN5246_c0_g1_i1.path1	Pepsico2_Contig3093.path2	novel.10110	TRINITY_DN14481_c1_g2_i1.path1
Pepsico2_Contig8726.path1	TRINITY_DN4708_c1_g1_i2.path1	TRINITY_DN59680_c0_g1_i1.path1	Pepsico2_Contig8726.path1	novel.6752
Pepsico2_Contig5160.path1	Pepsico2_Contig16302.path1	novel.336	novel.301	novel.4536
Pepsico2_Contig8462.path1	Pepsico2_Contig3599.path1	TRINITY_DN33186_c0_g1_i2.path1	Pepsico2_Contig3212.path1	Pepsico1_Contig4492.path1
Pepsico1_Contig3957.path1	TRINITY_DN21589_c1_g1_i1.path1	Pepsico2_Contig8726.path1	Pepsico1_Contig1451.path2	Pepsico1_Contig1181.path2
novel.6343	TRINITY_DN13415_c0_g3_i3.path1	novel.5147	novel.1687	TRINITY_DN20837_c0_g1_i1.path2
Pepsico2_Contig9477.path1	TRINITY_DN16546_c0_g1_i4.path1	Pepsico2_Contig5160.path1	novel.7728	Pepsico1_Contig2933.path1
novel.2489	TRINITY_DN23493_c0_g1_i1.path1	TRINITY_DN323_c0_g1_i2.path1	Pepsico2_Contig204.path2	Pepsico2_Contig6237.path2
TRINITY_DN10665_c0_g1_i2.path2	TRINITY_DN35543_c0_g1_i4.path1	TRINITY_DN13881_c0_g2_i8.path1	TRINITY_DN16045_c1_g1_i4.path2	TRINITY_DN31855_c0_g1_i2.path2
novel.942	Pepsico1_Contig672.path2	novel.10104	TRINITY_DN13467_c0_g1_i2.path2	novel.1283
TRINITY_DN33186_c0_g2_i1.path1	Pepsico1_Contig7432.path3	TRINITY_DN14238_c1_g1_i1.path1	novel.10331	Pepsico2_Contig10871.path1
TRINITY_DN4708_c1_g1_i2.path1	Pepsico1_Contig37533.path3	TRINITY_DN69_c1_g1_i1.path3	TRINITY_DN65750_c0_g1_i1.path2	TRINITY_DN22959_c0_g1_i1.path2
TRINITY_DN12913_c0_g1_i2.path2	novel.9392	novel.8	Pepsico2_Contig7310.path1	novel.2633
TRINITY_DN33186_c0_g1_i2.path1	Pepsico2_Contig8462.path1	Pepsico1_Contig37863.path1	novel.9982	Pepsico2_Contig19157.path1
novel.10567	Pepsico2_Contig5160.path1	novel.9991	novel.4532	novel.1137
Pepsico2_Contig9200.path1	novel.10525	TRINITY_DN6439_c0_g1_i1.path2	novel.8751	TRINITY_DN4027_c0_g5_i1.path1
Pepsico2_Contig7831.path2	novel.6221	novel.2978	TRINITY_DN5258_c0_g1_i20.path1	Pepsico2_Contig12395.path1
TRINITY_DN3478_c0_g1_i6.path1	novel.8632	TRINITY_DN2389_c0_g1_i4.path1	TRINITY_DN5174_c1_g1_i2.path1	Pepsico2_Contig15327.path1
TRINITY_DN11760_c0_g1_i2.path1	TRINITY_DN9140_c1_g1_i1.path1	TRINITY_DN10802_c0_g1_i1.path2	TRINITY_DN5865_c0_g2_i1.path1	Pepsico2_Contig15229.path2
Pepsico2_Contig12819.path1	novel.2520	TRINITY_DN22363_c1_g1_i2.path1	Pepsico1_Contig4611.path1	Pepsico2_Contig13697.path1
Pepsico2_Contig5219.path1	Pepsico1_Contig24342.path2	TRINITY_DN12964_c1_g1_i1.path2	Pepsico1_Contig7129.path1	Pepsico2_Contig3775.path1
TRINITY_DN5482_c0_g1_i1.path2	Pepsico2_Contig2152.path1	TRINITY_DN13415_c0_g3_i3.path1	TRINITY_DN28508_c0_g1_i6.path1	novel.6941
TRINITY_DN2551_c0_g2_i2.path2	Pepsico1_Contig32548.path2	Pepsico2_Contig4524.path1	novel.897	Pepsico1_Contig32548.path2
novel.3826	TRINITY_DN4449_c0_g3_i2.path2	TRINITY_DN556_c0_g1_i1.path3	TRINITY_DN107613_c0_g1_i1.path1	Pepsico2_Contig2081.path2
Pepsico2_Contig2484.path1	Pepsico2_Contig9370.path1	TRINITY_DN25384_c0_g2_i1.path1	Pepsico1_Contig165.path1	TRINITY_DN14491_c0_g1_i4.path1
novel.6696	Pepsico2_Contig11358.path1	novel.8734	novel.10250	TRINITY_DN28508_c0_g1_i6.path1
novel.5845	Pepsico2_Contig17380.path1	TRINITY_DN9737_c1_g3_i1.path1	Pepsico2_Contig426.path2	novel.6221
Pepsico1_Contig6110.path1	novel.2978	Pepsico2_Contig4927.path1	Pepsico2_Contig1861.path1	novel.4725
TRINITY_DN46389_c0_g1_i1.path1	TRINITY_DN5457_c0_g1_i2.path1	TRINITY_DN78620_c0_g1_i1.path1	Pepsico1_Contig1127.path1	novel.3162
novel.4742	novel.4544	Pepsico1_Contig37533.path3	TRINITY_DN3541_c0_g1_i4.path2	Pepsico1_Contig37537.path1
Pepsico1_Contig7932.path1	TRINITY_DN35472_c2_g1_i1.path1	Pepsico1_Contig32548.path2	Pepsico2_Contig4818.path1	TRINITY_DN4532_c0_g1_i4.path2
Pepsico1_Contig32548.path2	novel.2531	Pepsico2_Contig6644.path1	novel.1461	novel.9760
TRINITY_DN36154_c0_g1_i3.path1	Pepsico2_Contig7217.path2	novel.5592	Pepsico1_Contig2555.path1	novel.8563
novel.7923	novel.336	TRINITY_DN10626_c0_g1_i1.path1	novel.8361	Pepsico1_Contig556.path1
Pepsico2_Contig3093.path2	Pepsico1_Contig28299.path1	Pepsico1_Contig2933.path1	Pepsico2_Contig20515.path1	TRINITY_DN106297_c0_g1_i1.path1
novel.5908	Pepsico2_Contig1343.path2	novel.2989	Pepsico1_Contig672.path2	TRINITY_DN4515_c0_g1_i17.path1
TRINITY_DN7966_c0_g2_i3.path2	novel.10250	novel.265	Pepsico1_Contig7726.path1	novel.10147
TRINITY_DN10594_c0_g1_i4.path1	Pepsico2_Contig15229.path2	Pepsico1_Contig37537.path1	novel.1283	novel.2852
Pepsico2_Contig19535.path1	Pepsico2_Contig14708.path1	novel.7600	Pepsico1_Contig1872.path2	novel.8452
novel.4484	Pepsico1_Contig2933.path1	novel.5275	novel.2160	novel.9982
Pepsico1_Contig4939.path2	TRINITY_DN33186_c0_g1_i2.path1	TRINITY_DN11785_c1_g1_i1.path1	novel.10240	TRINITY_DN3469_c0_g1_i3.path1
novel.8153	novel.5592	Pepsico1_Contig24342.path2	novel.10162	Pepsico2_Contig4571.path1
TRINITY_DN9020_c0_g1_i24.path1	TRINITY_DN31113_c0_g3_i2.path1	novel.941	Pepsico2_Contig14244.path1	novel.9622
TRINITY_DN22830_c0_g2_i1.path1	novel.4425	TRINITY_DN4027_c0_g2_i1.path1	Pepsico2_Contig550.path1	novel.8378
novel.6513	Pepsico2_Contig16720.path1	Pepsico1_Contig185.path1	Pepsico2_Contig14668.path1	novel.4196
novel.620	TRINITY_DN29983_c0_g1_i2.path1	Pepsico2_Contig9200.path1	TRINITY_DN2977_c0_g1_i11.path1	novel.10511
novel.2894	TRINITY_DN7147_c0_g1_i3.path1	novel.2531	novel.10567	Pepsico1_Contig3453.path1
novel.3786	novel.10140	novel.4425	novel.10187	TRINITY_DN13294_c0_g1_i1.path1
novel.5176	novel.265	Pepsico2_Contig20778.path1	TRINITY_DN3664_c0_g3_i1.path1	TRINITY_DN82762_c0_g1_i1.path1
TRINITY_DN11328_c0_g1_i1.path1	TRINITY_DN17816_c0_g1_i1.path2	TRINITY_DN10594_c0_g1_i4.path1	novel.9227	TRINITY_DN69_c1_g2_i2.path2
Pepsico2_Contig3775.path1	Pepsico1_Contig5243.path1	Pepsico2_Contig10529.path2	novel.9882	TRINITY_DN476_c0_g1_i1.path1
novel.6221	novel.8734	novel.2520	Pepsico2_Contig6108.path1	novel.6380
TRINITY_DN7072_c7_g1_i1.path1	Pepsico2_Contig11468.path1	novel.8378	TRINITY_DN826_c0_g1_i8.path2	novel.10110
novel.1226	Pepsico1_Contig37537.path1	TRINITY_DN9140_c1_g1_i1.path1	novel.8601	Pepsico2_Contig17583.path1
novel.10227	novel.8378	TRINITY_DN3936_c0_g1_i5.path1	TRINITY_DN11785_c1_g1_i1.path1	Pepsico2_Contig17149.path2
novel.4425	Pepsico2_Contig2618.path1	novel.2633	Pepsico2_Contig7217.path2	novel.4503
novel.5859	Pepsico1_Contig3978.path1	novel.2160	TRINITY_DN10664_c1_g6_i1.path3	TRINITY_DN38303_c0_g1_i2.path1
TRINITY_DN476_c0_g1_i1.path1	TRINITY_DN8639_c0_g2_i1.path5	novel.6722	Pepsico1_Contig36309.path2	TRINITY_DN69_c1_g2_i2.path1
novel.9676	TRINITY_DN7084_c0_g1_i3.path1	Pepsico2_Contig7310.path1	Pepsico2_Contig20241.path1	TRINITY_DN9366_c0_g1_i4.path1
novel.336	TRINITY_DN78620_c0_g1_i1.path1	Pepsico2_Contig13697.path1	TRINITY_DN36478_c0_g1_i3.path1	Pepsico2_Contig9798.path1
TRINITY_DN21549_c0_g1_i1.path1	TRINITY_DN4027_c0_g2_i1.path1	novel.3627	TRINITY_DN8754_c0_g1_i2.path1	TRINITY_DN9386_c0_g1_i5.path1
novel.7944	TRINITY_DN59441_c0_g1_i2.path4	Pepsico1_Contig7932.path1	novel.7949	novel.3205
TRINITY_DN34221_c0_g1_i1.path2	novel.8740	novel.1386	novel.10221	novel.2389
Pepsico2_Contig426.path1	TRINITY_DN9020_c0_g1_i24.path1	TRINITY_DN53999_c0_g1_i1.path1	novel.9302	novel.8532
novel.6659	novel.7600	TRINITY_DN3478_c0_g1_i6.path1	Pepsico1_Contig1822.path1	novel.336
novel.9673	novel.6513	TRINITY_DN9776_c0_g1_i9.path2	Pepsico1_Contig37863.path1	TRINITY_DN582_c2_g1_i6.path1
TRINITY_DN13168_c0_g1_i1.path1	TRINITY_DN3478_c0_g1_i6.path1	novel.4758	novel.2796	novel.4772
Pepsico1_Contig37533.path3	Pepsico2_Contig10529.path2	novel.6243	novel.2	Pepsico2_Contig7217.path2
novel.6080	novel.2894	TRINITY_DN17463_c0_g1_i3.path1	Pepsico1_Contig4492.path1	TRINITY_DN19092_c0_g1_i1.path1
Pepsico2_Contig20783.path1	novel.10047	TRINITY_DN4576_c0_g2_i2.path1	TRINITY_DN6909_c0_g1_i6.path2	TRINITY_DN44353_c0_g1_i1.path1
Pepsico1_Contig415.path1	Pepsico1_Contig1034.path1	TRINITY_DN7084_c0_g1_i3.path1	Pepsico2_Contig19695.path1	Pepsico2_Contig3409.path1
TRINITY_DN9737_c1_g3_i1.path1	TRINITY_DN10626_c0_g1_i1.path1	TRINITY_DN3201_c0_g1_i4.path1	novel.7823	novel.8218
novel.8740	TRINITY_DN22504_c0_g2_i1.path1	TRINITY_DN9020_c0_g1_i24.path1	novel.10085	novel.3208
novel.5862	Pepsico2_Contig7831.path2	TRINITY_DN22830_c0_g2_i1.path1	novel.2852	TRINITY_DN9055_c0_g1_i3.path1
novel.5556	TRINITY_DN476_c0_g1_i1.path1	Pepsico2_Contig11265.path1	Pepsico2_Contig12405.path1	novel.941
novel.265	novel.3627	TRINITY_DN19704_c0_g1_i1.path1	novel.6124	TRINITY_DN11195_c1_g1_i1.path2
novel.10554	novel.9673	TRINITY_DN29983_c0_g1_i2.path1	TRINITY_DN1146_c0_g1_i1.path1	Pepsico1_Contig38.path2
TRINITY_DN28718_c0_g1_i7.path2	novel.8626	Pepsico2_Contig8228.path1	Pepsico2_Contig2921.path1	Pepsico1_Contig1577.path1
novel.6658	Pepsico2_Contig9200.path1	Pepsico2_Contig8796.path2	novel.6752	novel.2978
TRINITY_DN8471_c0_g2_i2.path1	novel.4532	novel.6055	Pepsico2_Contig2718.path1	Pepsico1_Contig264.path1
novel.9760	novel.7137	Pepsico2_Contig15327.path1	TRINITY_DN25384_c0_g2_i1.path1	novel.6187
novel.3162	TRINITY_DN1030_c0_g1_i11.path1	novel.10047	novel.9893	TRINITY_DN4449_c0_g3_i2.path2
novel.7098	Pepsico1_Contig8217.path2	Pepsico1_Contig3453.path1	novel.6221	TRINITY_DN15073_c0_g1_i2.path1
TRINITY_DN56186_c0_g1_i1.path2	novel.6752	novel.7686	Pepsico1_Contig1218.path1	Pepsico2_Contig5160.path1
novel.8378	TRINITY_DN57903_c0_g2_i1.path5	novel.8740	TRINITY_DN1483_c0_g2_i1.path1	novel.5092
novel.3208	novel.7923	Pepsico2_Contig16720.path1	novel.4050	novel.9673
Pepsico1_Contig4611.path1	novel.9827	TRINITY_DN12148_c0_g1_i2.path1	Pepsico2_Contig14383.path1	TRINITY_DN12040_c0_g1_i15.path2
Pepsico1_Contig7725.path1	novel.6055	novel.6513	Pepsico1_Contig654.path1	Pepsico1_Contig4160.path2
TRINITY_DN22613_c0_g1_i2.path1	TRINITY_DN3201_c0_g1_i4.path1	Pepsico2_Contig14570.path1	novel.6041	TRINITY_DN31623_c1_g1_i1.path1
TRINITY_DN53621_c0_g1_i1.path1	TRINITY_DN19704_c0_g1_i1.path1	TRINITY_DN5457_c0_g1_i2.path1	Pepsico2_Contig640.path1	novel.6513
TRINITY_DN9140_c1_g1_i1.path1	novel.5908	TRINITY_DN8605_c0_g1_i8.path1	TRINITY_DN22596_c0_g1_i7.path1	Pepsico1_Contig32542.path1
TRINITY_DN5457_c0_g1_i2.path1	novel.3660	TRINITY_DN44840_c1_g1_i1.path5	TRINITY_DN11134_c0_g1_i14.path1	TRINITY_DN1019_c0_g2_i1.path2
TRINITY_DN18240_c0_g3_i1.path1	Pepsico2_Contig14892.path2	Pepsico1_Contig7129.path1	TRINITY_DN14491_c0_g1_i4.path1	novel.2863
TRINITY_DN18254_c0_g1_i1.path1	Pepsico2_Contig17149.path2	Pepsico1_Contig32542.path1	Pepsico2_Contig12841.path2	novel.4680
TRINITY_DN6677_c0_g2_i2.path1	TRINITY_DN34912_c0_g1_i2.path1	novel.9793	TRINITY_DN2451_c0_g1_i3.path1	TRINITY_DN4954_c0_g2_i1.path1
Pepsico2_Contig20590.path1	novel.2633	Pepsico2_Contig4571.path1	Pepsico1_Contig2324.path1	novel.7311
TRINITY_DN12703_c0_g2_i1.path1	novel.1672	TRINITY_DN22959_c0_g1_i1.path2	TRINITY_DN16456_c0_g2_i15.path2	novel.2
novel.8626	novel.9991	novel.4538	TRINITY_DN21589_c1_g1_i1.path1	novel.4542
Pepsico1_Contig17817.path1	Pepsico1_Contig16695.path1	Pepsico1_Contig4611.path1	Pepsico2_Contig2152.path1	novel.2160
novel.2779	TRINITY_DN6144_c0_g2_i2.path2	novel.1239	Pepsico2_Contig13651.path1	novel.3781
TRINITY_DN6102_c0_g1_i1.path1	TRINITY_DN53999_c0_g1_i1.path1	novel.2	novel.6235	novel.8459
TRINITY_DN7084_c0_g1_i3.path1	novel.4952	TRINITY_DN9055_c0_g1_i3.path1	TRINITY_DN3936_c0_g1_i5.path1	TRINITY_DN16546_c0_g1_i4.path1
TRINITY_DN13776_c0_g1_i3.path1	TRINITY_DN22830_c0_g2_i1.path1	TRINITY_DN17793_c0_g3_i2.path1	novel.7458	novel.9585
Pepsico1_Contig3350.path1	novel.7301	Pepsico2_Contig11468.path1	novel.1479	TRINITY_DN15163_c0_g1_i1.path1
Pepsico1_Contig37537.path1	novel.1795	novel.4742	novel.2520	novel.7886
Pepsico2_Contig746.path1	novel.9760	Pepsico2_Contig2921.path1	Pepsico2_Contig20778.path1	novel.2026
TRINITY_DN14314_c1_g1_i2.path1	novel.9699	novel.5092	novel.5147	novel.7888
TRINITY_DN4576_c0_g2_i2.path1	Pepsico1_Contig3453.path1	TRINITY_DN10594_c0_g1_i4.path2	Pepsico2_Contig7908.path1	TRINITY_DN7068_c0_g1_i5.path1
TRINITY_DN69_c2_g1_i1.path1	TRINITY_DN23256_c0_g1_i1.path1	TRINITY_DN7127_c0_g2_i6.path2	Pepsico1_Contig26.path1	Pepsico2_Contig19544.path1
novel.354	TRINITY_DN12320_c0_g1_i2.path1	Pepsico2_Contig16352.path2	novel.316	novel.10148
novel.1137	TRINITY_DN4092_c0_g1_i3.path2	novel.9760	Pepsico1_Contig24342.path2	TRINITY_DN44840_c1_g1_i1.path5
Pepsico2_Contig14938.path1	novel.7098	Pepsico2_Contig1343.path2	TRINITY_DN4708_c1_g1_i2.path1	novel.4425
novel.8734	novel.354	TRINITY_DN10081_c0_g1_i2.path1	novel.3834	TRINITY_DN14386_c0_g1_i3.path1
Pepsico2_Contig12122.path1	Pepsico1_Contig1180.path1	Pepsico1_Contig836.path1	Pepsico1_Contig7260.path2	Pepsico2_Contig426.path1
Pepsico1_Contig37847.path1	novel.8459	TRINITY_DN34205_c0_g1_i1.path3	TRINITY_DN17812_c0_g1_i4.path2	Pepsico2_Contig20778.path1
novel.2633	TRINITY_DN9055_c0_g1_i3.path1	Pepsico2_Contig4727.path1	Pepsico1_Contig2510.path2	Pepsico2_Contig337.path1
novel.751	TRINITY_DN7072_c7_g1_i1.path1	novel.5961	TRINITY_DN4532_c0_g1_i4.path2	TRINITY_DN9020_c0_g1_i24.path1
Pepsico2_Contig8546.path1	novel.8055	TRINITY_DN53621_c0_g1_i1.path1	TRINITY_DN21916_c0_g1_i1.path1	novel.9913
novel.2963	Pepsico2_Contig4524.path1	Pepsico2_Contig16302.path1	TRINITY_DN15163_c0_g1_i1.path1	TRINITY_DN25005_c0_g1_i1.path1
TRINITY_DN59017_c0_g1_i1.path1	novel.4790	TRINITY_DN4719_c0_g1_i3.path2	novel.4536	novel.314
Pepsico2_Contig17466.path1	novel.8563	TRINITY_DN5246_c0_g1_i1.path1	novel.4655	novel.4050
Pepsico2_Contig3409.path1	Pepsico2_Contig19672.path3	novel.4680	Pepsico2_Contig10073.path1	novel.2779
TRINITY_DN15163_c0_g1_i1.path1	TRINITY_DN22689_c0_g1_i1.path1	novel.9673	Pepsico2_Contig18201.path1	novel.8962
TRINITY_DN9393_c0_g1_i1.path1	novel.4103	novel.1927	Pepsico2_Contig2081.path2	novel.9839
Pepsico1_Contig37386.path1	TRINITY_DN59441_c0_g1_i2.path2	Pepsico2_Contig17149.path2	Pepsico2_Contig14412.path3	novel.9302
TRINITY_DN17550_c0_g1_i2.path1	TRINITY_DN18254_c0_g1_i1.path1	novel.7923	novel.9863	novel.3627
TRINITY_DN40822_c0_g1_i1.path2	Pepsico2_Contig19824.path1	novel.3660	novel.2138	novel.1245
TRINITY_DN104219_c0_g1_i1.path1	Pepsico2_Contig8228.path1	TRINITY_DN14129_c0_g1_i5.path3	TRINITY_DN17463_c0_g1_i3.path1	novel.4448
Pepsico2_Contig16941.path1	TRINITY_DN24376_c0_g3_i1.path1	novel.2456	TRINITY_DN20133_c0_g1_i3.path1	novel.316
novel.8218	TRINITY_DN8826_c1_g6_i1.path4	novel.5747	novel.7600	TRINITY_DN5457_c0_g1_i2.path1
novel.6055	TRINITY_DN7514_c0_g1_i3.path2	novel.6653	novel.2989	Pepsico2_Contig550.path1
novel.2389	TRINITY_DN78715_c0_g1_i1.path1	TRINITY_DN1567_c0_g1_i5.path1	Pepsico2_Contig13697.path1	novel.2894
novel.121	TRINITY_DN9737_c1_g3_i1.path1	novel.7863	novel.8920	TRINITY_DN32690_c0_g2_i1.path1
Pepsico1_Contig8011.path1	novel.4742	Pepsico1_Contig3978.path1	TRINITY_DN323_c0_g1_i2.path1	TRINITY_DN8484_c0_g4_i1.path1
TRINITY_DN26026_c0_g1_i4.path1	TRINITY_DN18161_c0_g1_i10.path1	novel.9392	TRINITY_DN35472_c2_g1_i1.path1	TRINITY_DN14017_c0_g1_i1.path1
novel.8962	TRINITY_DN2551_c0_g2_i2.path2	TRINITY_DN12952_c0_g5_i1.path2	TRINITY_DN2389_c0_g1_i4.path1	novel.6402
TRINITY_DN10416_c0_g2_i1.path1	novel.5933	Pepsico2_Contig12299.path1	Pepsico2_Contig17583.path1	Pepsico2_Contig11468.path1
TRINITY_DN17122_c0_g1_i2.path1	TRINITY_DN7630_c0_g1_i1.path3	TRINITY_DN20133_c0_g1_i3.path1	Pepsico2_Contig13314.path1	TRINITY_DN13415_c0_g3_i3.path1
novel.6932	Pepsico2_Contig14747.path1	TRINITY_DN7072_c7_g1_i1.path1	Pepsico2_Contig7855.path1	TRINITY_DN22596_c0_g1_i7.path1
novel.4952	TRINITY_DN8779_c0_g2_i3.path2	Pepsico2_Contig2387.path1	TRINITY_DN4576_c0_g2_i2.path1	TRINITY_DN8471_c0_g2_i2.path1
novel.9674	novel.8142	Pepsico1_Contig1180.path1	Pepsico1_Contig3100.path2	novel.4103
Pepsico2_Contig11219.path2	Pepsico2_Contig9276.path1	novel.2894	TRINITY_DN4719_c0_g1_i3.path2	TRINITY_DN34497_c1_g1_i1.path3
novel.3660	novel.7886	TRINITY_DN42926_c0_g1_i1.path1	novel.2978	TRINITY_DN31456_c0_g2_i4.path2
novel.5092	TRINITY_DN45056_c0_g2_i1.path1	novel.3434	TRINITY_DN38303_c0_g1_i2.path1	TRINITY_DN13624_c0_g1_i5.path1
novel.6224	novel.6855	novel.1530	novel.4725	TRINITY_DN4515_c0_g1_i17.path2
novel.2888	TRINITY_DN4576_c0_g2_i2.path1	novel.6380	Pepsico2_Contig15179.path1	novel.1491
Pepsico2_Contig20979.path1	novel.2779	novel.8914	Pepsico2_Contig10871.path1	novel.7120
TRINITY_DN12320_c0_g1_i2.path1	TRINITY_DN12148_c0_g1_i2.path1	novel.8459	novel.9793	Pepsico2_Contig20979.path1
novel.9699	novel.1381	novel.6080	Pepsico2_Contig9614.path1	novel.7121
Pepsico2_Contig6725.path2	TRINITY_DN11944_c0_g1_i1.path1	novel.7924	Pepsico2_Contig20254.path2	TRINITY_DN4027_c0_g5_i1.path2
novel.4503	Pepsico2_Contig17466.path1	novel.8314	novel.4544	Pepsico2_Contig13314.path2
novel.9622	TRINITY_DN26301_c0_g1_i2.path1	Pepsico2_Contig10700.path1	novel.7460	novel.2661
novel.5126	novel.3162	TRINITY_DN73349_c0_g1_i1.path1	novel.8734	TRINITY_DN29983_c0_g1_i2.path1
novel.6341	TRINITY_DN82047_c0_g1_i1.path1	novel.7988	novel.9622	TRINITY_DN31207_c0_g1_i1.path1
novel.8563	novel.7944	novel.4503	TRINITY_DN74489_c0_g1_i1.path1	TRINITY_DN5174_c1_g1_i2.path1
Pepsico2_Contig16302.path1	Pepsico2_Contig18053.path1	TRINITY_DN12703_c0_g2_i1.path1	Pepsico1_Contig8200.path1	novel.2716
novel.7120	Pepsico2_Contig3775.path1	novel.1461	Pepsico2_Contig10700.path1	novel.5528
TRINITY_DN23852_c0_g1_i1.path1	TRINITY_DN42926_c0_g1_i1.path1	novel.3208	novel.4342	TRINITY_DN21549_c0_g1_i1.path1
novel.616	novel.941	TRINITY_DN26454_c0_g1_i1.path3	TRINITY_DN69_c1_g1_i1.path3	novel.3206
TRINITY_DN17710_c0_g2_i2.path1	TRINITY_DN1502_c0_g4_i1.path1	Pepsico2_Contig20185.path1	TRINITY_DN3478_c0_g1_i6.path1	novel.5020
Pepsico1_Contig34145.path1	TRINITY_DN28718_c0_g1_i7.path2	novel.2779	TRINITY_DN3201_c0_g1_i4.path1	novel.10047
TRINITY_DN1843_c0_g1_i4.path1	TRINITY_DN11357_c0_g1_i1.path1	novel.3230	novel.2531	TRINITY_DN95322_c0_g1_i1.path1
TRINITY_DN16546_c0_g1_i4.path1	novel.3786	novel.4706	novel.314	TRINITY_DN2_c0_g1_i2.path2
TRINITY_DN12383_c0_g1_i2.path1	novel.5533	TRINITY_DN21589_c1_g1_i1.path1	novel.6928	novel.7098
novel.3198	TRINITY_DN7966_c0_g2_i3.path2	novel.1809	Pepsico1_Contig2933.path1	TRINITY_DN33186_c0_g1_i2.path1
TRINITY_DN9366_c0_g1_i4.path1	TRINITY_DN2389_c0_g1_i4.path1	TRINITY_DN8500_c0_g1_i2.path1	Pepsico2_Contig10730.path1	novel.6928
novel.4815	novel.8914	novel.9373	novel.4538	Pepsico2_Contig7732.path2
novel.5385	novel.5092	novel.1736	Pepsico1_Contig556.path1	Pepsico1_Contig26224.path2
Pepsico1_Contig5243.path1	Pepsico2_Contig2484.path1	TRINITY_DN28069_c0_g1_i5.path1	novel.10104	novel.6259
TRINITY_DN24376_c0_g3_i1.path1	novel.3208	TRINITY_DN11134_c0_g1_i14.path1	Pepsico2_Contig12461.path1	novel.4682
TRINITY_DN26813_c0_g1_i5.path1	Pepsico1_Contig34145.path1	TRINITY_DN9385_c2_g1_i1.path1	Pepsico1_Contig6794.path1	novel.6080
novel.6924	Pepsico1_Contig32542.path1	novel.3205	novel.4594	Pepsico2_Contig7195.path2
TRINITY_DN80711_c0_g1_i1.path3	Pepsico1_Contig7932.path1	novel.4952	Pepsico2_Contig19399.path1	novel.5164
TRINITY_DN28959_c0_g1_i1.path1	novel.4967	novel.9676	TRINITY_DN78620_c0_g1_i1.path1	TRINITY_DN1567_c0_g1_i5.path1
novel.4444	Pepsico2_Contig3449.path1	TRINITY_DN476_c0_g1_i1.path1	Pepsico1_Contig771.path1	Pepsico2_Contig7908.path1
novel.1114	Pepsico1_Contig2960.path1	TRINITY_DN24376_c0_g3_i1.path1	TRINITY_DN69_c1_g2_i2.path2	novel.862
TRINITY_DN5246_c0_g1_i1.path1	TRINITY_DN17550_c0_g1_i2.path1	novel.3198	TRINITY_DN14202_c0_g3_i2.path1	novel.7451
novel.1736	TRINITY_DN8494_c1_g2_i1.path1	Pepsico2_Contig3775.path1	Pepsico2_Contig15229.path2	TRINITY_DN2111_c0_g1_i1.path1
novel.3781	TRINITY_DN7127_c0_g2_i6.path2	TRINITY_DN9366_c0_g1_i4.path1	novel.3212	novel.4742
novel.4471	novel.8962	Pepsico1_Contig1534.path1	TRINITY_DN97745_c0_g1_i2.path1	TRINITY_DN53472_c0_g1_i1.path1
Pepsico1_Contig6150.path1	novel.2456	TRINITY_DN5767_c0_g1_i5.path1	TRINITY_DN5457_c0_g1_i2.path1	Pepsico2_Contig4472.path1
novel.79	Pepsico2_Contig20979.path1	novel.3146	Pepsico2_Contig16986.path2	novel.10447
TRINITY_DN9055_c0_g1_i3.path1	TRINITY_DN9366_c0_g1_i4.path1	novel.4815	Pepsico2_Contig17247.path1	TRINITY_DN17550_c0_g1_i2.path1
TRINITY_DN7355_c0_g1_i2.path2	TRINITY_DN12960_c0_g1_i2.path2	TRINITY_DN45056_c0_g2_i1.path1	TRINITY_DN17793_c0_g3_i2.path1	TRINITY_DN20313_c0_g1_i6.path3
TRINITY_DN22177_c0_g1_i5.path1	Pepsico2_Contig7839.path1	novel.4682	novel.6930	Pepsico2_Contig9248.path1
novel.7833	novel.1283	novel.9699	TRINITY_DN506_c0_g1_i4.path1	Pepsico1_Contig28299.path1
novel.3221	TRINITY_DN22992_c0_g1_i1.path1	novel.3206	TRINITY_DN12148_c0_g1_i2.path1	TRINITY_DN7966_c0_g2_i3.path2
TRINITY_DN26301_c0_g1_i2.path1	novel.8572	TRINITY_DN26301_c0_g1_i2.path1	novel.9961	TRINITY_DN11705_c0_g1_i1.path1
novel.4790	novel.3210	novel.6059	TRINITY_DN9637_c0_g1_i4.path1	TRINITY_DN6419_c0_g1_i9.path1
TRINITY_DN23256_c0_g1_i1.path1	novel.7292	Pepsico2_Contig13314.path1	Pepsico2_Contig3720.path2	TRINITY_DN30743_c0_g1_i1.path1
TRINITY_DN78715_c0_g1_i1.path1	novel.6355	novel.7944	Pepsico1_Contig3453.path1	novel.1239
novel.1530	TRINITY_DN17440_c0_g1_i1.path1	novel.3162	novel.4836	TRINITY_DN323_c0_g1_i2.path1
novel.7686	novel.4682	Pepsico1_Contig34145.path1	novel.10509	TRINITY_DN33640_c0_g3_i1.path1
novel.6225	Pepsico2_Contig19223.path1	TRINITY_DN4498_c0_g1_i10.path1	Pepsico2_Contig21370.path1	novel.4815
novel.4103	Pepsico2_Contig14570.path1	novel.10537	novel.8378	novel.1226
novel.2527	novel.7863	novel.9968	TRINITY_DN53548_c0_g1_i1.path1	Pepsico2_Contig15659.path2
TRINITY_DN869_c0_g1_i1.path2	TRINITY_DN9737_c2_g1_i1.path1	novel.7886	TRINITY_DN25461_c0_g1_i1.path1	novel.2645
Pepsico1_Contig4680.path1	novel.1717	TRINITY_DN8862_c2_g1_i8.path2	TRINITY_DN5246_c0_g1_i1.path1	TRINITY_DN12320_c0_g1_i2.path1
TRINITY_DN42926_c0_g1_i1.path1	TRINITY_DN53621_c0_g1_i1.path1	TRINITY_DN8494_c1_g2_i1.path1	novel.2673	novel.2014
TRINITY_DN53999_c0_g1_i1.path1	Pepsico1_Contig1896.path1	novel.7451	novel.265	TRINITY_DN49890_c0_g1_i1.path1
novel.3302	novel.4503	novel.7772	TRINITY_DN102054_c0_g1_i1.path1	TRINITY_DN10626_c0_g1_i1.path1
TRINITY_DN9494_c0_g1_i2.path1	TRINITY_DN28069_c0_g1_i5.path1	novel.4448	novel.336	TRINITY_DN6501_c0_g1_i1.path1
novel.8568	novel.8016	TRINITY_DN20313_c0_g1_i6.path3	TRINITY_DN8849_c1_g1_i7.path1	TRINITY_DN9737_c1_g3_i1.path1
TRINITY_DN10467_c0_g1_i3.path1	novel.6224	TRINITY_DN17816_c0_g1_i1.path2	novel.6380	novel.8223
novel.10371	TRINITY_DN8471_c0_g2_i2.path1	TRINITY_DN4954_c0_g2_i1.path1	novel.6233	Pepsico2_Contig16273.path2
novel.3530	novel.7120	TRINITY_DN20918_c0_g3_i1.path1	TRINITY_DN33186_c0_g1_i2.path1	TRINITY_DN6439_c0_g1_i1.path2
Pepsico2_Contig3578.path2	novel.3146	TRINITY_DN6501_c0_g1_i1.path1	Pepsico2_Contig5160.path1	novel.4734
TRINITY_DN7772_c0_g1_i4.path1	TRINITY_DN15251_c0_g1_i1.path2	TRINITY_DN17793_c0_g1_i1.path1	novel.9760	TRINITY_DN7333_c1_g1_i4.path1
TRINITY_DN89105_c0_g1_i1.path1	novel.7610	novel.354	TRINITY_DN22193_c0_g1_i2.path1	TRINITY_DN8639_c0_g2_i1.path3
novel.6730	TRINITY_DN25186_c0_g1_i1.path3	TRINITY_DN18254_c0_g1_i1.path1	novel.8682	TRINITY_DN24376_c0_g3_i1.path1
TRINITY_DN3601_c0_g1_i1.path2	novel.4450	Pepsico2_Contig14412.path3	Pepsico2_Contig7195.path2	TRINITY_DN20226_c0_g1_i3.path1
TRINITY_DN7333_c1_g1_i4.path1	TRINITY_DN6606_c0_g1_i1.path2	novel.8563	novel.3063	novel.8572
TRINITY_DN8471_c0_g1_i4.path1	TRINITY_DN12913_c0_g1_i2.path2	novel.5908	TRINITY_DN22830_c0_g2_i1.path1	TRINITY_DN5245_c0_g1_i2.path1
novel.6382	Pepsico2_Contig18919.path1	novel.1491	novel.650	Pepsico2_Contig14383.path1
novel.8016	Pepsico1_Contig37847.path1	TRINITY_DN10891_c0_g1_i1.path3	TRINITY_DN42306_c0_g1_i3.path2	novel.1186
novel.3210	novel.5640	novel.1717	Pepsico2_Contig15466.path2	novel.9227
Pepsico1_Contig2013.path1	TRINITY_DN9693_c0_g1_i7.path1	TRINITY_DN5491_c0_g1_i3.path1	TRINITY_DN10594_c0_g1_i4.path1	TRINITY_DN10860_c0_g1_i2.path1
novel.1491	novel.4471	novel.8218	TRINITY_DN44840_c1_g1_i1.path5	novel.9461
Pepsico1_Contig33914.path1	novel.1530	novel.4772	TRINITY_DN2476_c0_g1_i22.path2	novel.2707
TRINITY_DN15518_c0_g1_i5.path1	novel.3198	novel.6341	Pepsico2_Contig12871.path2	TRINITY_DN19732_c1_g1_i2.path1
TRINITY_DN24281_c0_g1_i3.path2	TRINITY_DN10709_c0_g1_i3.path1	Pepsico2_Contig3599.path1	TRINITY_DN9140_c1_g1_i1.path1	TRINITY_DN8849_c1_g1_i7.path1
novel.4682	TRINITY_DN38303_c0_g1_i2.path1	novel.6224	TRINITY_DN37597_c0_g1_i1.path1	novel.5670
TRINITY_DN18904_c0_g1_i1.path2	novel.2888	TRINITY_DN7993_c0_g1_i8.path1	novel.2037	novel.9392
TRINITY_DN8494_c1_g2_i1.path1	Pepsico1_Contig3816.path2	Pepsico2_Contig14796.path1	TRINITY_DN7310_c0_g1_i1.path1	TRINITY_DN21044_c2_g1_i1.path4
Pepsico2_Contig9370.path1	novel.79	TRINITY_DN23256_c0_g1_i1.path1	Pepsico1_Contig37537.path1	novel.10104
TRINITY_DN5199_c0_g2_i1.path2	TRINITY_DN98933_c0_g1_i1.path1	Pepsico2_Contig20979.path1	Pepsico1_Contig843.path1	Pepsico2_Contig12443.path1
Pepsico1_Contig1180.path1	Pepsico2_Contig17102.path1	Pepsico2_Contig12984.path1	Pepsico1_Contig37533.path3	TRINITY_DN25461_c0_g1_i1.path1
novel.5592	TRINITY_DN7355_c0_g1_i2.path2	novel.213	TRINITY_DN13415_c0_g3_i3.path1	novel.1356
novel.10179	Pepsico2_Contig2180.path1	TRINITY_DN43155_c0_g1_i1.path1	Pepsico2_Contig6237.path2	novel.1530
Pepsico1_Contig36309.path2	TRINITY_DN9385_c2_g1_i1.path1	TRINITY_DN9136_c0_g1_i2.path1	novel.2633	Pepsico2_Contig19672.path3
Pepsico1_Contig1188.path2	novel.1491	novel.8142	novel.4680	novel.6992
novel.2441	Pepsico2_Contig5219.path1	novel.4790	novel.2026	novel.8451
novel.941	novel.2389	novel.3210	Pepsico1_Contig865.path1	novel.8232
TRINITY_DN22689_c0_g1_i1.path1	TRINITY_DN6342_c0_g1_i1.path1	TRINITY_DN10664_c1_g6_i1.path1	novel.10145	TRINITY_DN71743_c0_g1_i1.path1
Pepsico1_Contig1181.path2	novel.4815	novel.10187	TRINITY_DN8639_c0_g2_i1.path3	TRINITY_DN4076_c0_g1_i5.path1
novel.9410	novel.3221	novel.8003	Pepsico2_Contig10529.path2	novel.2989
TRINITY_DN8826_c1_g6_i1.path4	TRINITY_DN7068_c0_g1_i5.path1	novel.3221	Pepsico1_Contig5136.path1	TRINITY_DN8471_c0_g1_i4.path1
Pepsico1_Contig38.path2	TRINITY_DN50046_c0_g1_i1.path1	TRINITY_DN4092_c0_g1_i3.path2	novel.6722	Pepsico1_Contig37533.path3
novel.6041	novel.6225	TRINITY_DN17550_c0_g1_i2.path1	Pepsico2_Contig17686.path1	novel.7944
novel.5381	TRINITY_DN23242_c0_g2_i5.path1	Pepsico1_Contig743.path1	novel.8772	novel.1142
novel.1449	TRINITY_DN7311_c0_g1_i1.path1	Pepsico2_Contig4472.path1	TRINITY_DN553_c0_g2_i1.path1	TRINITY_DN53999_c0_g1_i1.path1
Pepsico1_Contig26654.path1	TRINITY_DN12244_c1_g2_i1.path1	novel.7884	Pepsico2_Contig3093.path2	Pepsico2_Contig3599.path1
TRINITY_DN35061_c1_g1_i2.path1	novel.1809	novel.3786	novel.10047	novel.5908
TRINITY_DN37142_c0_g1_i1.path2	TRINITY_DN15969_c0_g1_i3.path1	Pepsico2_Contig9864.path1	Pepsico1_Contig3350.path1	Pepsico2_Contig13651.path1
novel.5386	novel.6343	novel.1488	Pepsico1_Contig32542.path1	TRINITY_DN5246_c0_g1_i1.path1
TRINITY_DN8596_c4_g1_i1.path1	TRINITY_DN14890_c0_g3_i1.path1	TRINITY_DN7355_c0_g1_i2.path2	TRINITY_DN95322_c0_g1_i1.path1	TRINITY_DN34430_c1_g1_i1.path1
novel.7158	Pepsico2_Contig7935.path1	novel.3013	TRINITY_DN1462_c0_g4_i1.path1	Pepsico2_Contig2484.path1
Pepsico2_Contig14708.path1	novel.3205	novel.2961	novel.3820	TRINITY_DN12145_c0_g1_i1.path1
TRINITY_DN28069_c0_g1_i5.path1	novel.8451	novel.1646	novel.3230	TRINITY_DN13842_c0_g2_i2.path1
TRINITY_DN53548_c0_g1_i1.path1	novel.4196	Pepsico1_Contig37105.path1	TRINITY_DN4934_c0_g1_i2.path1	TRINITY_DN6909_c0_g1_i6.path2
TRINITY_DN61322_c0_g1_i1.path1	Pepsico2_Contig13314.path1	novel.3212	Pepsico2_Contig11265.path1	novel.2888
novel.8142	TRINITY_DN21549_c0_g1_i1.path1	TRINITY_DN7966_c0_g2_i3.path2	novel.9392	novel.3146
novel.3033	novel.3694	novel.6928	TRINITY_DN15790_c0_g1_i3.path2	TRINITY_DN6342_c0_g1_i1.path1
Pepsico2_Contig14572.path1	TRINITY_DN1968_c0_g1_i4.path1	TRINITY_DN12320_c0_g1_i2.path1	novel.7886	TRINITY_DN3425_c0_g2_i1.path1
TRINITY_DN45056_c0_g2_i1.path1	TRINITY_DN10891_c0_g1_i1.path3	TRINITY_DN25005_c0_g1_i1.path1	novel.6941	novel.6927
novel.4835	TRINITY_DN20918_c0_g3_i1.path1	novel.6355	novel.1466	TRINITY_DN28069_c0_g1_i5.path1
novel.5885	TRINITY_DN7993_c0_g1_i8.path1	novel.9461	novel.3162	novel.9373
novel.5528	Pepsico2_Contig19104.path1	TRINITY_DN21549_c0_g1_i1.path1	novel.7311	TRINITY_DN37365_c0_g2_i3.path5
TRINITY_DN6501_c0_g1_i1.path1	TRINITY_DN1040_c0_g1_i1.path1	TRINITY_DN14890_c0_g3_i1.path1	novel.7988	Pepsico2_Contig9973.path1
novel.1717	TRINITY_DN26454_c0_g1_i1.path3	novel.6225	TRINITY_DN5767_c0_g1_i5.path1	novel.321
novel.10047	Pepsico2_Contig2408.path3	novel.3781	novel.5604	TRINITY_DN10081_c0_g1_i2.path1
novel.3206	TRINITY_DN8469_c0_g1_i11.path1	novel.4196	novel.2733	TRINITY_DN8862_c2_g1_i8.path2
Pepsico2_Contig16986.path1	novel.2961	novel.79	TRINITY_DN25384_c0_g1_i1.path1	novel.2833
novel.4532	novel.3762	novel.5933	TRINITY_DN19031_c0_g2_i1.path1	TRINITY_DN2854_c0_g1_i1.path1
Pepsico1_Contig5656.path1	TRINITY_DN9386_c0_g1_i5.path1	Pepsico2_Contig1967.path1	novel.1386	novel.6225
TRINITY_DN30461_c0_g1_i14.path1	TRINITY_DN8939_c0_g1_i1.path1	novel.314	TRINITY_DN22959_c0_g1_i1.path2	novel.9991
TRINITY_DN15969_c0_g1_i3.path1	TRINITY_DN10664_c1_g6_i1.path1	Pepsico2_Contig17466.path1	TRINITY_DN24832_c0_g2_i4.path1	Pepsico2_Contig9200.path1
novel.5670	TRINITY_DN21106_c0_g1_i1.path2	Pepsico2_Contig8462.path1	Pepsico2_Contig4893.path1	TRINITY_DN7242_c0_g2_i1.path1
novel.5267	novel.566	TRINITY_DN9007_c0_g1_i2.path1	Pepsico2_Contig7702.path1	TRINITY_DN1502_c0_g4_i1.path2
novel.8756	novel.8359	novel.1671	Pepsico1_Contig1514.path1	novel.8016
Pepsico1_Contig4160.path2	novel.6341	Pepsico2_Contig10642.path2	Pepsico2_Contig19672.path3	novel.473
novel.1488	novel.4538	novel.5670	TRINITY_DN2_c0_g3_i1.path1	TRINITY_DN25777_c0_g1_i1.path2
Pepsico1_Contig16695.path1	novel.8003	TRINITY_DN25461_c0_g1_i1.path1	TRINITY_DN88045_c0_g1_i1.path1	Pepsico1_Contig1331.path2
novel.6260	novel.1680	TRINITY_DN21357_c0_g1_i1.path1	TRINITY_DN10626_c0_g1_i1.path1	Pepsico1_Contig32234.path1
novel.7336	Pepsico1_Contig37386.path1	novel.7120	Pepsico2_Contig4571.path1	TRINITY_DN38837_c0_g2_i3.path1
novel.9371	TRINITY_DN10416_c0_g2_i1.path1	Pepsico1_Contig3816.path2	Pepsico2_Contig7732.path2	novel.4952
TRINITY_DN29706_c0_g2_i2.path1	novel.5604	novel.8572	TRINITY_DN37365_c0_g2_i3.path1	TRINITY_DN7355_c0_g1_i2.path2
novel.2956	novel.10447	Pepsico1_Contig3350.path1	Pepsico2_Contig1933.path1	novel.4836
TRINITY_DN10812_c0_g1_i2.path1	novel.6380	novel.6937	Pepsico2_Contig11468.path1	Pepsico2_Contig14570.path1
TRINITY_DN4954_c0_g2_i1.path1	novel.7833	novel.1680	TRINITY_DN9693_c0_g1_i7.path1	TRINITY_DN30361_c0_g1_i2.path1
TRINITY_DN19018_c0_g1_i1.path1	novel.7451	TRINITY_DN215_c0_g4_i1.path1	Pepsico2_Contig3775.path1	TRINITY_DN17932_c0_g2_i5.path2
novel.2272	Pepsico2_Contig9864.path1	TRINITY_DN53548_c0_g1_i1.path1	Pepsico1_Contig1451.path1	Pepsico2_Contig20289.path1
novel.6170	novel.620	novel.8920	Pepsico2_Contig18493.path1	TRINITY_DN16719_c1_g2_i2.path3
novel.2137	novel.4448	TRINITY_DN1766_c0_g2_i2.path1	TRINITY_DN9737_c1_g3_i1.path1	TRINITY_DN64826_c0_g1_i1.path2
TRINITY_DN14890_c0_g3_i1.path1	TRINITY_DN9007_c0_g1_i2.path1	novel.6806	TRINITY_DN9366_c0_g1_i4.path1	TRINITY_DN15185_c0_g3_i5.path2
novel.7720	TRINITY_DN5491_c0_g1_i3.path1	novel.1142	TRINITY_DN9055_c0_g1_i3.path1	Pepsico2_Contig14892.path2
TRINITY_DN4261_c0_g1_i2.path1	TRINITY_DN44508_c0_g1_i1.path1	Pepsico2_Contig20515.path1	TRINITY_DN31456_c0_g2_i4.path2	TRINITY_DN4340_c0_g3_i1.path1
Pepsico2_Contig15229.path2	Pepsico2_Contig17284.path1	TRINITY_DN6342_c0_g1_i1.path1	novel.10042	TRINITY_DN78715_c0_g1_i1.path1
novel.3190	novel.29	novel.2272	TRINITY_DN35472_c1_g1_i1.path1	TRINITY_DN43074_c0_g1_i1.path1
TRINITY_DN215_c0_g4_i1.path1	novel.4680	Pepsico2_Contig2484.path1	Pepsico2_Contig9200.path1	TRINITY_DN19029_c0_g1_i1.path1
novel.9353	TRINITY_DN20313_c0_g1_i6.path3	Pepsico2_Contig16302.path2	novel.4503	TRINITY_DN20133_c0_g1_i3.path2
TRINITY_DN7472_c0_g1_i1.path1	Pepsico2_Contig2036.path2	novel.4103	novel.7863	TRINITY_DN40419_c0_g1_i1.path1
TRINITY_DN10664_c1_g6_i1.path1	novel.1365	TRINITY_DN12913_c0_g1_i2.path2	TRINITY_DN4027_c0_g2_i1.path1	novel.10537
novel.4909	novel.3834	novel.1186	TRINITY_DN2202_c0_g1_i2.path2	novel.1646
novel.1186	Pepsico2_Contig19816.path1	novel.10447	Pepsico2_Contig3196.path2	Pepsico2_Contig3417.path3
TRINITY_DN15616_c0_g1_i5.path3	novel.9676	TRINITY_DN4340_c0_g3_i1.path1	novel.4425	TRINITY_DN6533_c1_g1_i2.path1
TRINITY_DN99656_c0_g1_i1.path1	novel.8568	Pepsico2_Contig10938.path2	novel.1809	TRINITY_DN7072_c7_g1_i1.path1
novel.4755	novel.1736	TRINITY_DN37195_c0_g1_i7.path1	Pepsico1_Contig37308.path1	novel.7923
TRINITY_DN17932_c0_g2_i5.path2	TRINITY_DN4954_c0_g2_i1.path1	novel.2389	Pepsico1_Contig32548.path2	novel.2272
TRINITY_DN17816_c0_g1_i1.path2	Pepsico2_Contig2899.path1	TRINITY_DN20226_c0_g1_i3.path1	TRINITY_DN53621_c0_g1_i1.path1	TRINITY_DN2202_c0_g1_i2.path2
Pepsico2_Contig9614.path1	TRINITY_DN35061_c1_g1_i2.path1	TRINITY_DN4449_c0_g3_i2.path2	TRINITY_DN14241_c0_g1_i1.path1	Pepsico2_Contig8228.path1
TRINITY_DN10891_c0_g1_i1.path3	Pepsico2_Contig20778.path1	TRINITY_DN11760_c0_g1_i2.path1	novel.3781	TRINITY_DN1167_c0_g2_i1.path1
novel.6165	novel.9461	novel.1692	TRINITY_DN6439_c0_g1_i1.path2	TRINITY_DN38115_c0_g1_i1.path1
novel.3664	TRINITY_DN29706_c0_g2_i2.path1	TRINITY_DN11869_c0_g1_i1.path1	Pepsico2_Contig19544.path1	TRINITY_DN13349_c0_g1_i9.path1
novel.6191	TRINITY_DN21116_c0_g1_i2.path1	TRINITY_DN5174_c1_g1_i2.path1	novel.4252	novel.2637
novel.6402	novel.1488	novel.8016	TRINITY_DN618_c0_g1_i2.path1	novel.8568
novel.680	novel.8218	Pepsico2_Contig10882.path2	TRINITY_DN1030_c0_g1_i11.path1	TRINITY_DN20918_c0_g3_i1.path1
TRINITY_DN9737_c2_g1_i1.path1	novel.8827	TRINITY_DN8849_c1_g1_i7.path1	novel.1927	TRINITY_DN38137_c0_g1_i1.path1
novel.2142	novel.3206	TRINITY_DN43686_c0_g1_i1.path1	novel.1361	TRINITY_DN3857_c0_g1_i1.path1
TRINITY_DN45877_c0_g1_i1.path1	novel.3437	TRINITY_DN9737_c2_g1_i1.path1	novel.6238	Pepsico2_Contig10882.path2
novel.10313	novel.347	TRINITY_DN7333_c1_g1_i4.path1	TRINITY_DN69_c2_g1_i1.path2	novel.1702
novel.10447	Pepsico2_Contig10040.path1	novel.9827	novel.10319	novel.8536
novel.2966	TRINITY_DN10477_c1_g1_i6.path2	Pepsico2_Contig13314.path2	TRINITY_DN2038_c0_g1_i6.path1	novel.7630
Pepsico2_Contig4524.path1	novel.2272	TRINITY_DN8639_c0_g2_i1.path3	novel.4542	novel.2961
TRINITY_DN32750_c1_g1_i7.path1	Pepsico2_Contig12767.path1	TRINITY_DN4449_c0_g1_i3.path2	TRINITY_DN4868_c0_g1_i1.path2	novel.5932
novel.1142	TRINITY_DN7333_c1_g1_i4.path1	novel.7301	novel.4742	novel.6343
novel.2589	TRINITY_DN50134_c0_g1_i1.path1	Pepsico2_Contig4411.path1	TRINITY_DN26560_c0_g2_i1.path1	TRINITY_DN8469_c0_g1_i11.path1
novel.4940	TRINITY_DN1567_c0_g1_i5.path1	novel.8195	novel.8532	TRINITY_DN13385_c1_g1_i3.path1
TRINITY_DN20313_c0_g1_i6.path3	TRINITY_DN215_c0_g4_i1.path1	TRINITY_DN7242_c0_g2_i1.path1	TRINITY_DN13881_c0_g2_i8.path1	novel.8672
novel.2456	TRINITY_DN69_c1_g2_i2.path1	TRINITY_DN8596_c4_g1_i1.path1	TRINITY_DN53999_c0_g1_i1.path1	Pepsico2_Contig19535.path1
novel.4765	Pepsico1_Contig34834.path3	novel.6382	Pepsico1_Contig216.path2	Pepsico2_Contig16302.path2
novel.7695	TRINITY_DN32665_c0_g1_i1.path1	TRINITY_DN16355_c0_g1_i5.path1	Pepsico1_Contig36152.path1	novel.2138
TRINITY_DN5536_c1_g1_i4.path2	TRINITY_DN6501_c0_g1_i1.path1	novel.641	novel.8632	TRINITY_DN16966_c0_g2_i1.path1
TRINITY_DN8704_c0_g1_i2.path1	novel.10326	Pepsico1_Contig37847.path1	TRINITY_DN11601_c0_g1_i2.path1	novel.9787
novel.7451	novel.7888	novel.3970	novel.2731	novel.3941
TRINITY_DN19704_c0_g1_i1.path1	novel.5556	TRINITY_DN95322_c0_g1_i1.path1	Pepsico2_Contig3093.path1	TRINITY_DN7127_c0_g2_i6.path2
novel.8314	novel.6191	novel.7132	novel.4103	novel.10221
TRINITY_DN6342_c0_g1_i1.path1	TRINITY_DN23852_c0_g1_i1.path1	novel.8451	novel.10511	Pepsico2_Contig14837.path1
novel.6355	TRINITY_DN8704_c0_g1_i2.path1	TRINITY_DN4261_c0_g1_i2.path1	TRINITY_DN7514_c0_g1_i3.path2	novel.2156
novel.1795	Pepsico1_Contig26224.path2	TRINITY_DN8826_c1_g6_i1.path4	Pepsico2_Contig200.path1	novel.9197
novel.6138	novel.6806	Pepsico2_Contig10102.path2	TRINITY_DN69_c1_g2_i2.path1	TRINITY_DN25055_c0_g1_i1.path1
novel.10027	novel.213	TRINITY_DN111530_c0_g1_i1.path2	Pepsico2_Contig20249.path1	novel.10085
novel.7888	Pepsico2_Contig10882.path2	novel.3820	novel.9373	novel.9476
novel.9991	novel.10537	novel.2138	novel.4196	Pepsico2_Contig9614.path3
Pepsico1_Contig5655.path1	TRINITY_DN24832_c0_g2_i4.path1	novel.8962	TRINITY_DN9020_c0_g1_i24.path1	TRINITY_DN11785_c1_g1_i1.path1
TRINITY_DN6768_c0_g1_i1.path2	novel.6243	TRINITY_DN17932_c0_g2_i5.path2	novel.9740	novel.5933
TRINITY_DN17093_c0_g1_i1.path1	novel.6375	TRINITY_DN3601_c0_g1_i1.path2	novel.8914	Pepsico2_Contig19721.path2
novel.7886	novel.8743	novel.1610	TRINITY_DN34205_c0_g1_i1.path1	TRINITY_DN7084_c0_g1_i3.path1
TRINITY_DN30714_c0_g1_i2.path1	Pepsico2_Contig10938.path2	novel.9967	TRINITY_DN10081_c0_g1_i2.path1	TRINITY_DN6573_c0_g1_i4.path1
TRINITY_DN1040_c0_g1_i1.path1	TRINITY_DN5865_c0_g2_i1.path1	novel.8929	novel.3205	novel.7507
TRINITY_DN11600_c0_g1_i1.path1	novel.7132	novel.3941	novel.9881	novel.2456
novel.8743	TRINITY_DN8471_c0_g1_i4.path1	TRINITY_DN17850_c2_g1_i1.path1	TRINITY_DN24505_c0_g1_i1.path1	TRINITY_DN45056_c0_g2_i1.path1
novel.10525	novel.4026	novel.3646	TRINITY_DN19704_c0_g1_i1.path1	Pepsico2_Contig7319.path1
TRINITY_DN47515_c0_g1_i2.path1	novel.1927	novel.1381	Pepsico2_Contig9864.path1	TRINITY_DN6228_c0_g3_i1.path1
novel.566	TRINITY_DN17463_c0_g1_i3.path1	novel.6098	novel.9057	novel.641
Pepsico2_Contig9474.path1	TRINITY_DN95322_c0_g1_i1.path1	TRINITY_DN6436_c0_g1_i2.path1	TRINITY_DN20313_c0_g1_i6.path3	TRINITY_DN103518_c0_g1_i1.path1
novel.10555	novel.3521	novel.1137	TRINITY_DN37359_c0_g1_i1.path3	Pepsico1_Contig34834.path3
TRINITY_DN13621_c0_g1_i1.path1	TRINITY_DN869_c0_g1_i1.path2	novel.2966	TRINITY_DN27590_c0_g1_i2.path1	novel.7383
TRINITY_DN13842_c0_g2_i2.path1	Pepsico2_Contig7310.path1	Pepsico2_Contig11157.path1	novel.2894	Pepsico2_Contig5323.path1
Pepsico1_Contig51.path1	Pepsico2_Contig20590.path1	Pepsico2_Contig16486.path1	Pepsico2_Contig18659.path1	TRINITY_DN37195_c0_g1_i7.path1
novel.4785	TRINITY_DN37195_c0_g1_i7.path1	novel.10326	TRINITY_DN1502_c0_g4_i1.path2	novel.10087
novel.3995	TRINITY_DN111530_c0_g1_i1.path2	Pepsico2_Contig12871.path3	Pepsico2_Contig9211.path2	TRINITY_DN19935_c0_g1_i10.path1
TRINITY_DN6436_c0_g1_i2.path1	TRINITY_DN556_c0_g1_i1.path3	TRINITY_DN11598_c0_g1_i1.path1	TRINITY_DN13914_c0_g1_i2.path1	novel.4371
TRINITY_DN79182_c0_g1_i1.path1	novel.1137	novel.7630	novel.3208	novel.5180
TRINITY_DN21149_c0_g3_i1.path1	novel.6527	novel.10525	TRINITY_DN4027_c0_g5_i1.path1	TRINITY_DN37160_c0_g1_i1.path1
TRINITY_DN111530_c0_g1_i1.path2	TRINITY_DN28719_c0_g4_i1.path1	novel.6941	novel.6513	novel.8003
novel.5970	novel.1186	TRINITY_DN15645_c1_g1_i8.path1	novel.8218	Pepsico2_Contig6725.path2
novel.6923	novel.5862	TRINITY_DN79972_c0_g1_i1.path1	novel.1137	novel.7695
novel.8914	Pepsico2_Contig20227.path2	TRINITY_DN31207_c0_g1_i1.path1	novel.941	novel.8001
novel.7884	Pepsico2_Contig6725.path2	TRINITY_DN1019_c0_g2_i1.path2	Pepsico2_Contig9117.path1	Pepsico2_Contig17466.path1
Pepsico1_Contig7353.path1	novel.3302	novel.4679	novel.6526	novel.5911
TRINITY_DN8925_c0_g1_i1.path1	TRINITY_DN14877_c0_g1_i2.path1	Pepsico2_Contig14892.path2	novel.6912	Pepsico1_Contig5951.path2
TRINITY_DN10837_c0_g1_i1.path1	novel.1239	TRINITY_DN106297_c0_g1_i1.path1	TRINITY_DN5246_c0_g1_i1.path2	novel.2557
TRINITY_DN16719_c1_g2_i2.path3	Pepsico2_Contig2081.path2	TRINITY_DN33358_c0_g2_i1.path1	novel.7132	novel.3477
TRINITY_DN9920_c0_g1_i11.path1	TRINITY_DN12171_c0_g1_i7.path2	TRINITY_DN32665_c0_g1_i1.path1	novel.2779	novel.2682
TRINITY_DN27142_c0_g2_i1.path1	Pepsico2_Contig3409.path1	TRINITY_DN98933_c0_g1_i1.path1	TRINITY_DN4456_c0_g2_i10.path4	novel.1488
novel.2962	TRINITY_DN55735_c1_g1_i1.path1	TRINITY_DN4225_c0_g1_i11.path1	Pepsico2_Contig13157.path1	Pepsico2_Contig441.path1
novel.9787	novel.7772	novel.6402	novel.10226	TRINITY_DN12019_c0_g1_i3.path1
TRINITY_DN98933_c0_g1_i1.path1	Pepsico2_Contig4927.path1	novel.6229	novel.9991	novel.1806
TRINITY_DN2585_c2_g1_i1.path2	TRINITY_DN8596_c4_g1_i1.path1	novel.7383	Pepsico1_Contig66.path1	TRINITY_DN7993_c0_g1_i8.path1
novel.2155	novel.5878	TRINITY_DN18240_c0_g3_i1.path1	Pepsico2_Contig9123.path2	TRINITY_DN610_c0_g3_i2.path1
TRINITY_DN27677_c0_g1_i2.path1	TRINITY_DN89105_c0_g1_i1.path1	TRINITY_DN40642_c0_g1_i1.path3	TRINITY_DN7242_c0_g1_i2.path1	novel.8632
TRINITY_DN14238_c1_g1_i1.path1	TRINITY_DN71109_c0_g1_i1.path2	TRINITY_DN8704_c0_g1_i2.path1	novel.10563	novel.6041
novel.9391	Pepsico2_Contig12433.path2	TRINITY_DN6605_c1_g2_i1.path1	novel.1692	novel.9990
novel.3378	novel.6382	TRINITY_DN11148_c0_g2_i1.path1	Pepsico2_Contig8462.path1	Pepsico1_Contig2462.path1
Pepsico2_Contig12984.path1	TRINITY_DN18513_c0_g1_i1.path1	TRINITY_DN34912_c0_g1_i2.path1	Pepsico2_Contig8262.path1	novel.3302
TRINITY_DN17990_c0_g1_i15.path1	TRINITY_DN4340_c0_g3_i1.path1	novel.7888	TRINITY_DN41957_c0_g1_i1.path1	novel.2553
Pepsico1_Contig5677.path1	novel.2823	TRINITY_DN20837_c0_g1_i1.path2	TRINITY_DN7966_c0_g2_i3.path2	TRINITY_DN33725_c0_g1_i2.path1
Pepsico2_Contig15364.path1	novel.3682	Pepsico2_Contig14572.path1	novel.10190	Pepsico1_Contig35386.path2
novel.240	TRINITY_DN17850_c2_g1_i1.path1	TRINITY_DN22689_c0_g1_i1.path1	Pepsico2_Contig17142.path1	novel.5276
TRINITY_DN49221_c0_g1_i1.path1	Pepsico2_Contig20617.path1	TRINITY_DN1258_c0_g4_i2.path1	novel.9673	TRINITY_DN12913_c0_g3_i1.path1
TRINITY_DN20215_c0_g1_i3.path1	TRINITY_DN11615_c0_g1_i1.path1	TRINITY_DN38837_c0_g2_i3.path1	TRINITY_DN42400_c4_g1_i1.path1	TRINITY_DN7242_c0_g1_i2.path1
novel.8178	novel.10555	novel.6187	novel.5556	novel.2539
novel.210	TRINITY_DN98417_c0_g1_i1.path1	novel.6517	Pepsico1_Contig2846.path1	novel.10561
novel.6613	novel.9793	TRINITY_DN22824_c0_g1_i2.path1	TRINITY_DN10664_c1_g6_i1.path1	novel.5523
TRINITY_DN25489_c0_g1_i1.path1	novel.7884	TRINITY_DN14545_c0_g1_i1.path2	Pepsico1_Contig33505.path1	novel.7286
novel.7424	novel.6209	TRINITY_DN19935_c0_g1_i10.path1	Pepsico2_Contig17149.path2	novel.3291
novel.1387	novel.5	TRINITY_DN8471_c0_g2_i2.path1	Pepsico1_Contig3978.path1	TRINITY_DN6565_c0_g1_i3.path1
novel.9349	TRINITY_DN88081_c0_g1_i1.path1	Pepsico2_Contig3409.path1	TRINITY_DN476_c0_g1_i1.path1	novel.3786
novel.4244	TRINITY_DN9350_c0_g1_i3.path1	Pepsico1_Contig6150.path1	novel.10148	TRINITY_DN47897_c0_g1_i1.path1
TRINITY_DN38837_c0_g2_i3.path1	novel.3766	TRINITY_DN1502_c0_g4_i1.path2	novel.8740	novel.1717
Pepsico2_Contig2548.path1	novel.4785	novel.4471	Pepsico1_Contig3816.path2	novel.3040
Pepsico2_Contig18303.path1	TRINITY_DN19935_c0_g1_i10.path1	novel.4500	novel.1530	novel.6095
TRINITY_DN9891_c0_g4_i1.path2	TRINITY_DN22613_c0_g1_i2.path1	TRINITY_DN9350_c0_g1_i3.path1	TRINITY_DN21549_c0_g1_i1.path1	TRINITY_DN25777_c0_g1_i1.path4
novel.10308	TRINITY_DN6228_c0_g3_i1.path1	novel.2835	TRINITY_DN10594_c0_g1_i4.path2	TRINITY_DN6047_c0_g2_i3.path1
novel.4335	TRINITY_DN75269_c0_g1_i1.path1	novel.8673	TRINITY_DN13294_c0_g1_i1.path1	novel.2530
Pepsico2_Contig1053.path2	novel.10032	novel.9837	TRINITY_DN7084_c0_g1_i3.path1	novel.7970
Pepsico2_Contig12255.path1	novel.3664	novel.3430	TRINITY_DN22972_c0_g1_i1.path1	Pepsico2_Contig19238.path1
novel.4458	TRINITY_DN12145_c0_g1_i1.path1	novel.3302	TRINITY_DN11435_c0_g1_i6.path1	Pepsico2_Contig16832.path1
TRINITY_DN64826_c0_g1_i1.path2	Pepsico2_Contig20050.path1	TRINITY_DN20215_c0_g1_i3.path1	Pepsico2_Contig426.path1	Pepsico1_Contig1180.path1
novel.347	TRINITY_DN20226_c0_g1_i3.path1	TRINITY_DN19880_c0_g1_i1.path1	novel.4289	novel.455
TRINITY_DN24_c2_g1_i1.path1	novel.1115	Pepsico2_Contig14708.path1	Pepsico1_Contig4160.path2	Pepsico2_Contig16486.path1
novel.3430	Pepsico2_Contig16486.path1	novel.4785	TRINITY_DN1567_c0_g1_i5.path1	Pepsico1_Contig526.path2
novel.317	novel.9027	TRINITY_DN10416_c0_g2_i1.path1	TRINITY_DN2761_c0_g2_i3.path1	novel.3190
novel.4538	Pepsico2_Contig12140.path1	TRINITY_DN71109_c0_g1_i1.path2	Pepsico2_Contig17799.path1	novel.10157
TRINITY_DN75757_c0_g1_i1.path1	TRINITY_DN10891_c1_g1_i1.path2	TRINITY_DN7691_c0_g5_i1.path1	novel.9912	novel.2968
TRINITY_DN6439_c0_g1_i1.path2	novel.4500	TRINITY_DN21044_c2_g1_i1.path4	TRINITY_DN24376_c0_g3_i1.path1	TRINITY_DN17545_c0_g1_i1.path1
TRINITY_DN8639_c0_g2_i1.path3	Pepsico2_Contig19697.path1	TRINITY_DN15251_c0_g1_i1.path2	novel.2014	novel.8740
novel.4774	novel.5970	TRINITY_DN15969_c0_g1_i3.path1	novel.2553	novel.6220
TRINITY_DN8984_c0_g1_i4.path1	Pepsico2_Contig16947.path2	novel.6715	novel.7888	TRINITY_DN14211_c0_g1_i3.path1
TRINITY_DN11869_c0_g1_i1.path1	TRINITY_DN3936_c0_g1_i5.path1	novel.2845	novel.1245	novel.10555
novel.9793	novel.5267	TRINITY_DN81975_c0_g1_i1.path1	TRINITY_DN7072_c7_g1_i1.path1	novel.3430
Pepsico2_Contig13314.path1	TRINITY_DN87711_c0_g1_i1.path1	TRINITY_DN29706_c0_g2_i2.path1	Pepsico1_Contig37116.path1	TRINITY_DN31076_c0_g1_i4.path1
novel.3651	novel.3378	novel.3766	Pepsico2_Contig20979.path1	novel.7424
novel.10531	TRINITY_DN78657_c0_g1_i1.path1	Pepsico1_Contig6482.path2	novel.9197	TRINITY_DN22689_c0_g1_i1.path1
TRINITY_DN24832_c0_g2_i4.path1	TRINITY_DN27677_c0_g1_i2.path1	novel.7500	novel.5092	novel.8810
novel.1672	novel.5911	TRINITY_DN32750_c1_g1_i7.path1	TRINITY_DN8242_c0_g2_i11.path1	novel.4755
novel.6107	TRINITY_DN26107_c0_g1_i2.path1	Pepsico2_Contig9798.path1	TRINITY_DN82762_c0_g1_i1.path1	TRINITY_DN18185_c0_g1_i6.path1
TRINITY_DN9350_c0_g1_i3.path1	TRINITY_DN11869_c0_g1_i1.path1	novel.774	novel.1396	TRINITY_DN3337_c1_g1_i2.path2
TRINITY_DN6228_c0_g3_i1.path1	Pepsico2_Contig16834.path1	novel.9476	novel.8982	TRINITY_DN11615_c0_g1_i1.path1
TRINITY_DN95322_c0_g1_i1.path1	TRINITY_DN14979_c0_g1_i6.path1	TRINITY_DN6009_c0_g1_i6.path1	TRINITY_DN10905_c0_g1_i6.path2	Pepsico1_Contig37847.path1
TRINITY_DN14937_c0_g1_i2.path2	novel.2835	novel.10251	novel.662	novel.7326
Pepsico2_Contig7839.path1	novel.6080	novel.1836	novel.2389	Pepsico1_Contig3100.path2
TRINITY_DN18513_c0_g1_i1.path1	TRINITY_DN38837_c0_g2_i3.path1	novel.347	novel.4663	novel.90
TRINITY_DN13996_c0_g1_i2.path1	novel.5330	TRINITY_DN69_c2_g1_i1.path1	TRINITY_DN78715_c0_g1_i1.path1	novel.877
Pepsico2_Contig20289.path1	TRINITY_DN10081_c0_g1_i2.path1	Pepsico2_Contig20289.path1	Pepsico2_Contig14026.path1	TRINITY_DN20131_c0_g1_i4.path1
Pepsico2_Contig14292.path1	TRINITY_DN34497_c1_g1_i1.path3	TRINITY_DN21826_c0_g1_i1.path1	TRINITY_DN15210_c0_g1_i2.path1	novel.1795
novel.4062	TRINITY_DN19029_c0_g1_i1.path1	TRINITY_DN78715_c0_g1_i1.path1	TRINITY_DN34497_c1_g1_i1.path3	TRINITY_DN26301_c0_g1_i2.path1
novel.7121	Pepsico2_Contig12299.path1	TRINITY_DN98417_c0_g1_i1.path1	Pepsico1_Contig6351.path1	novel.10105
TRINITY_DN7691_c0_g1_i1.path2	TRINITY_DN7934_c2_g1_i7.path1	novel.5	TRINITY_DN15073_c0_g1_i2.path1	novel.8485
novel.9360	novel.8314	novel.1245	novel.8	Pepsico1_Contig6661.path2
novel.6806	TRINITY_DN21044_c2_g1_i1.path4	Pepsico1_Contig33914.path1	TRINITY_DN19177_c0_g1_i1.path1	TRINITY_DN10664_c1_g6_i1.path1
TRINITY_DN40924_c0_g1_i4.path1	novel.12	TRINITY_DN78657_c0_g1_i1.path1	novel.7138	TRINITY_DN64836_c0_g1_i1.path1
TRINITY_DN7934_c2_g1_i7.path1	novel.9674	Pepsico2_Contig17314.path1	Pepsico2_Contig7383.path1	novel.5253
TRINITY_DN20918_c0_g3_i1.path1	novel.774	novel.5330	Pepsico1_Contig37386.path1	novel.4761
TRINITY_DN9509_c0_g1_i4.path1	novel.5528	novel.5849	TRINITY_DN11478_c0_g1_i4.path2	novel.8195
novel.2961	novel.2956	TRINITY_DN69_c1_g2_i2.path1	novel.1491	novel.7309
novel.5027	Pepsico2_Contig12871.path3	TRINITY_DN16546_c0_g1_i4.path1	TRINITY_DN8445_c0_g1_i4.path2	novel.6355
novel.8514	novel.9707	novel.1935	novel.2456	novel.1708
TRINITY_DN12386_c0_g2_i1.path1	TRINITY_DN10891_c1_g1_i1.path1	novel.10201	novel.7120	TRINITY_DN5920_c1_g2_i3.path1
Pepsico2_Contig19697.path1	TRINITY_DN16719_c1_g2_i2.path3	TRINITY_DN12171_c0_g1_i7.path2	TRINITY_DN16546_c0_g1_i4.path1	TRINITY_DN18254_c0_g1_i1.path1
novel.10349	novel.2962	novel.6159	novel.2645	novel.1736
novel.5969	TRINITY_DN2111_c0_g1_i1.path1	novel.473	novel.9726	novel.10363
TRINITY_DN12408_c0_g2_i2.path1	novel.10179	TRINITY_DN27818_c0_g1_i1.path2	novel.4242	TRINITY_DN25751_c0_g1_i2.path1
novel.12	Pepsico1_Contig14374.path1	TRINITY_DN8484_c0_g4_i1.path1	TRINITY_DN13908_c0_g4_i1.path1	Pepsico1_Contig165.path1
novel.10326	novel.5969	novel.6473	TRINITY_DN26301_c0_g1_i2.path1	novel.7113
TRINITY_DN20153_c1_g1_i1.path1	novel.1836	TRINITY_DN5662_c0_g1_i3.path1	Pepsico2_Contig17816.path1	novel.392
TRINITY_DN22030_c0_g1_i4.path1	TRINITY_DN18240_c0_g3_i1.path1	novel.5528	TRINITY_DN12040_c0_g1_i15.path2	Pepsico2_Contig13314.path1
novel.7516	novel.6517	TRINITY_DN10471_c0_g2_i1.path1	novel.4772	TRINITY_DN39067_c0_g1_i1.path1
novel.7847	TRINITY_DN4789_c0_g1_i1.path3	novel.6855	novel.4682	Pepsico2_Contig7708.path1
novel.7677	novel.8195	TRINITY_DN40924_c0_g1_i4.path1	novel.7451	novel.5970
TRINITY_DN10718_c0_g4_i1.path1	TRINITY_DN44840_c1_g1_i1.path5	novel.392	TRINITY_DN6951_c0_g1_i14.path1	TRINITY_DN87460_c0_g1_i1.path1
novel.4191	novel.6720	novel.2990	novel.213	TRINITY_DN28605_c0_g3_i3.path1
novel.8451	novel.2966	TRINITY_DN31855_c0_g1_i2.path2	novel.3146	TRINITY_DN53621_c0_g1_i1.path1
TRINITY_DN111692_c0_g1_i1.path1	novel.8673	novel.6191	TRINITY_DN14017_c0_g1_i1.path1	TRINITY_DN9509_c0_g1_i4.path1
TRINITY_DN2111_c0_g1_i1.path1	Pepsico1_Contig1037.path1	TRINITY_DN31113_c0_g3_i2.path1	TRINITY_DN25556_c0_g2_i1.path1	Pepsico2_Contig10529.path2
novel.4448	Pepsico1_Contig37105.path1	Pepsico2_Contig363.path1	TRINITY_DN22077_c0_g1_i12.path2	TRINITY_DN75397_c0_g1_i1.path1
Pepsico1_Contig4300.path1	novel.5849	novel.29	TRINITY_DN16355_c0_g1_i5.path1	novel.10518
novel.9384	novel.7823	TRINITY_DN2111_c0_g1_i1.path1	TRINITY_DN19898_c0_g5_i2.path1	Pepsico1_Contig5775.path1
TRINITY_DN15509_c1_g1_i2.path1	TRINITY_DN19194_c0_g1_i2.path1	Pepsico2_Contig17265.path1	novel.2272	TRINITY_DN69_c2_g1_i1.path1
novel.6105	novel.9476	TRINITY_DN4532_c0_g1_i4.path2	novel.4095	TRINITY_DN2567_c0_g1_i1.path1
novel.5180	Pepsico2_Contig4571.path1	novel.6239	novel.9944	novel.6224
TRINITY_DN1567_c0_g1_i5.path1	novel.2291	novel.6992	novel.4787	TRINITY_DN14583_c0_g1_i3.path1
novel.8203	novel.1477	novel.5020	Pepsico2_Contig3409.path1	Pepsico1_Contig3978.path1
novel.2953	TRINITY_DN18286_c0_g1_i1.path2	TRINITY_DN64826_c0_g1_i1.path2	novel.9585	novel.8831
TRINITY_DN2657_c0_g1_i2.path1	TRINITY_DN20215_c0_g1_i3.path1	Pepsico1_Contig415.path1	novel.7923	TRINITY_DN29706_c0_g2_i2.path1
novel.857	novel.9528	TRINITY_DN8471_c0_g1_i4.path1	TRINITY_DN98933_c0_g1_i1.path1	novel.354
novel.3682	novel.9687	TRINITY_DN9621_c0_g1_i4.path3	TRINITY_DN23337_c0_g1_i1.path1	novel.10187
novel.8003	TRINITY_DN26591_c0_g1_i1.path1	novel.3291	novel.7746	TRINITY_DN31256_c0_g1_i1.path1
TRINITY_DN8862_c2_g1_i8.path2	novel.7847	novel.5180	TRINITY_DN8484_c0_g4_i1.path1	TRINITY_DN13996_c0_g1_i2.path1
Pepsico2_Contig7708.path1	novel.1527	TRINITY_DN26107_c0_g1_i2.path1	novel.2661	Pepsico2_Contig2456.path2
TRINITY_DN29573_c0_g1_i8.path1	Pepsico2_Contig6644.path1	novel.5911	Pepsico2_Contig16540.path1	Pepsico1_Contig33914.path1
novel.6159	Pepsico2_Contig6259.path1	Pepsico1_Contig5775.path1	TRINITY_DN7127_c0_g2_i6.path2	novel.10519
novel.7300	TRINITY_DN33725_c0_g1_i2.path1	novel.729	novel.6683	TRINITY_DN29640_c0_g3_i1.path1
TRINITY_DN7335_c0_g1_i7.path1	TRINITY_DN8587_c1_g1_i1.path1	Pepsico2_Contig14039.path1	novel.354	novel.2781
TRINITY_DN73349_c0_g1_i1.path1	TRINITY_DN22391_c0_g1_i2.path1	TRINITY_DN12218_c0_g1_i4.path2	Pepsico2_Contig14014.path1	TRINITY_DN9776_c0_g1_i9.path2
novel.979	novel.4244	TRINITY_DN25777_c0_g1_i1.path2	novel.6217	TRINITY_DN215_c0_g4_i1.path1
novel.5974	novel.6653	novel.3040	novel.9839	novel.9847
Pepsico2_Contig20286.path2	TRINITY_DN37142_c0_g1_i1.path2	Pepsico2_Contig7831.path2	TRINITY_DN25005_c0_g1_i1.path1	TRINITY_DN27607_c0_g1_i10.path1
Pepsico2_Contig19268.path1	Pepsico1_Contig37863.path1	novel.7650	TRINITY_DN285_c1_g1_i1.path1	TRINITY_DN8704_c0_g1_i2.path1
TRINITY_DN10437_c0_g1_i2.path1	TRINITY_DN12381_c0_g2_i1.path1	TRINITY_DN8984_c0_g1_i4.path1	novel.10447	TRINITY_DN4954_c0_g2_i1.path2
TRINITY_DN69132_c0_g1_i1.path1	Pepsico2_Contig1053.path2	Pepsico2_Contig20783.path1	TRINITY_DN8984_c0_g1_i4.path1	novel.2990
Pepsico1_Contig15322.path1	novel.10518	novel.6037	novel.9967	TRINITY_DN13229_c0_g1_i1.path1
novel.10078	Pepsico2_Contig12984.path1	TRINITY_DN1550_c3_g1_i2.path1	novel.641	TRINITY_DN4261_c0_g1_i2.path1
Pepsico2_Contig11832.path1	novel.6715	novel.9015	Pepsico2_Contig4927.path1	TRINITY_DN17386_c0_g1_i6.path1
Pepsico1_Contig4060.path1	Pepsico2_Contig5323.path1	TRINITY_DN13432_c0_g1_i1.path1	Pepsico2_Contig12984.path1	TRINITY_DN14372_c0_g1_i1.path2
novel.386	novel.10329	novel.6231	novel.5164	novel.9833
novel.5	TRINITY_DN79972_c0_g1_i1.path1	TRINITY_DN31623_c1_g1_i1.path1	TRINITY_DN23390_c0_g1_i1.path1	TRINITY_DN32750_c1_g1_i7.path1
Pepsico1_Contig3047.path3	TRINITY_DN8984_c0_g1_i4.path1	novel.2591	novel.7503	TRINITY_DN10812_c0_g1_i2.path1
novel.4772	novel.5670	novel.5878	Pepsico2_Contig12871.path3	Pepsico2_Contig14411.path2
TRINITY_DN26591_c0_g1_i1.path1	novel.6045	novel.8568	TRINITY_DN103518_c0_g1_i1.path1	TRINITY_DN69304_c0_g1_i1.path1
TRINITY_DN7993_c0_g1_i8.path1	Pepsico2_Contig19114.path1	novel.4967	Pepsico2_Contig14572.path1	TRINITY_DN8659_c0_g2_i1.path1
TRINITY_DN26107_c0_g1_i2.path1	TRINITY_DN69825_c0_g1_i1.path1	Pepsico2_Contig5323.path1	TRINITY_DN13624_c0_g1_i5.path1	TRINITY_DN9300_c0_g1_i5.path3
TRINITY_DN7983_c0_g1_i3.path2	TRINITY_DN14976_c1_g2_i1.path1	Pepsico2_Contig11358.path1	novel.10518	TRINITY_DN10905_c0_g1_i6.path2
TRINITY_DN20200_c1_g1_i5.path5	Pepsico2_Contig746.path1	novel.8055	Pepsico2_Contig2180.path1	TRINITY_DN9920_c0_g1_i11.path1
novel.641	Pepsico1_Contig33914.path1	TRINITY_DN16719_c1_g2_i2.path3	novel.6225	TRINITY_DN36958_c0_g2_i1.path1
novel.9486	TRINITY_DN13996_c0_g1_i2.path1	novel.6045	novel.8003	Pepsico2_Contig4524.path2
novel.5276	novel.5900	TRINITY_DN9696_c0_g1_i1.path1	TRINITY_DN8330_c1_g1_i1.path1	TRINITY_DN11054_c1_g2_i2.path1
Pepsico1_Contig32234.path1	TRINITY_DN25070_c0_g1_i1.path1	Pepsico2_Contig12952.path2	novel.7364	novel.10078
novel.2530	TRINITY_DN12917_c0_g1_i1.path1	Pepsico2_Contig16273.path2	novel.4815	novel.7428
novel.1806	Pepsico1_Contig5775.path1	TRINITY_DN102507_c0_g1_i1.path1	Pepsico2_Contig19460.path2	novel.8652
novel.5064	novel.2441	Pepsico2_Contig14877.path1	novel.10537	novel.213
Pepsico2_Contig4571.path1	TRINITY_DN30461_c0_g1_i14.path1	TRINITY_DN33725_c0_g1_i2.path1	TRINITY_DN6533_c1_g1_i2.path1	Pepsico2_Contig12871.path3
TRINITY_DN27638_c0_g1_i9.path1	Pepsico2_Contig14938.path1	novel.5865	novel.1186	Pepsico2_Contig2978.path2
Pepsico2_Contig6462.path2	Pepsico2_Contig19875.path1	Pepsico2_Contig9614.path1	TRINITY_DN98417_c0_g1_i1.path1	novel.4967
novel.5878	Pepsico2_Contig17265.path1	TRINITY_DN12145_c0_g1_i1.path1	novel.3206	TRINITY_DN17816_c0_g1_i1.path2
Pepsico1_Contig4661.path1	TRINITY_DN8596_c0_g2_i1.path1	TRINITY_DN17358_c1_g2_i4.path1	novel.5390	TRINITY_DN9007_c0_g1_i2.path1
TRINITY_DN12171_c0_g1_i7.path2	novel.656	TRINITY_DN17687_c0_g2_i2.path1	novel.7668	TRINITY_DN9737_c2_g1_i1.path1
Pepsico2_Contig14570.path1	Pepsico1_Contig4680.path1	Pepsico2_Contig14022.path1	novel.1680	novel.10177
TRINITY_DN27_c3_g1_i1.path1	novel.1719	novel.8672	Pepsico2_Contig12299.path1	Pepsico1_Contig7725.path1
Pepsico1_Contig2110.path2	novel.5020	TRINITY_DN8469_c0_g1_i11.path1	TRINITY_DN16825_c0_g1_i7.path1	TRINITY_DN97436_c0_g1_i1.path1
Pepsico2_Contig13697.path1	TRINITY_DN11608_c2_g1_i1.path1	novel.6930	novel.6992	novel.4584
TRINITY_DN9396_c0_g1_i1.path2	novel.1386	TRINITY_DN11195_c1_g1_i1.path2	Pepsico2_Contig16720.path1	TRINITY_DN92266_c0_g1_i1.path1
novel.4500	Pepsico2_Contig426.path1	TRINITY_DN46999_c0_g1_i1.path1	novel.8001	novel.3198
novel.8928	novel.5276	novel.7503	Pepsico2_Contig2484.path1	Pepsico2_Contig8385.path1
novel.6183	novel.8997	novel.6157	Pepsico2_Contig12326.path2	Pepsico1_Contig865.path1
novel.6941	Pepsico2_Contig7319.path1	novel.6183	novel.9913	Pepsico2_Contig10700.path1
TRINITY_DN6230_c1_g1_i1.path1	novel.9787	TRINITY_DN69132_c0_g1_i1.path1	novel.2961	Pepsico1_Contig3047.path3
TRINITY_DN12145_c0_g1_i1.path1	novel.7336	Pepsico2_Contig12172.path1	TRINITY_DN27095_c0_g1_i1.path1	TRINITY_DN18286_c0_g1_i1.path2
TRINITY_DN12218_c0_g1_i4.path2	TRINITY_DN6439_c0_g1_i1.path2	novel.5828	TRINITY_DN51144_c0_g1_i3.path1	TRINITY_DN7614_c1_g2_i1.path1
novel.6220	TRINITY_DN17932_c0_g2_i5.path2	TRINITY_DN10891_c1_g1_i1.path2	Pepsico2_Contig16302.path1	TRINITY_DN22311_c0_g1_i7.path1
TRINITY_DN20226_c0_g1_i3.path1	TRINITY_DN7242_c0_g2_i1.path1	TRINITY_DN26591_c0_g1_i1.path1	novel.9814	TRINITY_DN52025_c0_g1_i2.path1
Pepsico1_Contig3816.path2	novel.8928	Pepsico2_Contig19444.path1	TRINITY_DN21044_c2_g1_i1.path4	Pepsico1_Contig14696.path1
TRINITY_DN15406_c0_g1_i1.path1	TRINITY_DN86693_c0_g1_i1.path1	TRINITY_DN7242_c0_g1_i2.path1	TRINITY_DN11938_c0_g1_i1.path1	novel.10055
novel.1118	novel.386	novel.2959	Pepsico1_Contig838.path1	TRINITY_DN231_c2_g3_i1.path1
TRINITY_DN26078_c0_g1_i1.path1	TRINITY_DN69132_c0_g1_i1.path1	TRINITY_DN49221_c0_g1_i1.path1	Pepsico1_Contig34834.path3	TRINITY_DN12086_c0_g2_i2.path1
TRINITY_DN19850_c0_g1_i11.path2	Pepsico1_Contig6150.path1	TRINITY_DN9693_c0_g1_i7.path1	novel.1275	Pepsico2_Contig16302.path1
TRINITY_DN14953_c0_g1_i3.path1	novel.3434	novel.4003	TRINITY_DN17550_c0_g1_i2.path1	TRINITY_DN931_c0_g2_i2.path1
TRINITY_DN81327_c0_g1_i1.path1	Pepsico1_Contig4198.path2	novel.9393	Pepsico2_Contig7452.path1	TRINITY_DN13217_c0_g1_i1.path3
novel.8207	TRINITY_DN53548_c0_g1_i1.path1	novel.6323	novel.10508	novel.7650
novel.8827	novel.6183	TRINITY_DN9637_c0_g1_i4.path1	TRINITY_DN4515_c0_g1_i17.path1	TRINITY_DN42926_c0_g1_i1.path1
novel.1239	TRINITY_DN2585_c2_g1_i1.path2	Pepsico1_Contig14374.path1	novel.6949	TRINITY_DN10595_c0_g2_i2.path2
novel.2781	novel.9410	novel.8690	Pepsico2_Contig20218.path1	novel.5556
TRINITY_DN5491_c1_g5_i1.path1	TRINITY_DN11076_c0_g1_i1.path1	TRINITY_DN28719_c0_g4_i1.path1	Pepsico2_Contig11944.path1	novel.6415
novel.4371	novel.6356	novel.10247	Pepsico2_Contig1953.path1	TRINITY_DN33640_c0_g1_i1.path1
TRINITY_DN13646_c0_g1_i1.path1	TRINITY_DN26467_c0_g1_i1.path1	TRINITY_DN12964_c1_g1_i1.path1	TRINITY_DN11475_c0_g2_i2.path1	novel.1410
TRINITY_DN29163_c0_g5_i1.path1	TRINITY_DN13842_c0_g2_i2.path1	novel.4542	novel.1477	TRINITY_DN7279_c0_g3_i1.path1
TRINITY_DN13305_c0_g1_i1.path1	Pepsico1_Contig5732.path2	novel.5850	novel.6006	novel.3664
Pepsico2_Contig10882.path2	TRINITY_DN32553_c0_g1_i1.path1	novel.8743	novel.1974	TRINITY_DN105250_c0_g1_i1.path1
TRINITY_DN42172_c0_g1_i1.path2	novel.5828	Pepsico1_Contig28299.path1	Pepsico1_Contig1188.path2	TRINITY_DN26562_c0_g1_i1.path1
novel.7842	novel.4470	TRINITY_DN4769_c0_g1_i5.path1	novel.6482	TRINITY_DN75417_c0_g1_i1.path2
Pepsico2_Contig9383.path2	novel.7383	TRINITY_DN14976_c1_g2_i1.path1	TRINITY_DN86693_c0_g1_i1.path1	TRINITY_DN29776_c0_g2_i1.path1
novel.4398	novel.9353	TRINITY_DN18286_c0_g1_i1.path2	novel.5670	Pepsico1_Contig5499.path1
Pepsico1_Contig32542.path1	novel.641	Pepsico1_Contig1320.path1	novel.6402	Pepsico1_Contig32360.path1
novel.5253	TRINITY_DN13332_c0_g1_i6.path1	TRINITY_DN71897_c0_g1_i1.path1	TRINITY_DN4515_c0_g1_i17.path2	Pepsico2_Contig19695.path1
novel.4196	Pepsico1_Contig415.path1	TRINITY_DN869_c0_g1_i1.path2	TRINITY_DN11195_c1_g1_i1.path2	TRINITY_DN29283_c0_g1_i1.path2
novel.6216	Pepsico2_Contig3010.path1	novel.8652	novel.2716	novel.5865
TRINITY_DN11902_c0_g2_i2.path1	TRINITY_DN64826_c0_g1_i1.path2	novel.2956	novel.7424	novel.5673
novel.392	TRINITY_DN31317_c1_g1_i2.path1	novel.6109	Pepsico2_Contig9248.path1	TRINITY_DN15668_c0_g3_i2.path1
TRINITY_DN79340_c0_g1_i1.path1	TRINITY_DN32750_c1_g1_i7.path1	novel.10078	TRINITY_DN6501_c0_g1_i1.path1	Pepsico2_Contig17223.path2
TRINITY_DN109518_c0_g1_i1.path3	novel.4191	TRINITY_DN14975_c0_g1_i4.path1	TRINITY_DN29983_c0_g1_i2.path1	TRINITY_DN10979_c0_g2_i8.path1
novel.29	Pepsico2_Contig5526.path1	novel.4755	TRINITY_DN6133_c4_g1_i1.path1	novel.1140
TRINITY_DN97436_c0_g1_i1.path1	TRINITY_DN373_c0_g2_i8.path1	novel.3682	TRINITY_DN9402_c0_g1_i1.path1	TRINITY_DN19404_c0_g1_i1.path1
novel.282	novel.5257	novel.5673	novel.5137	novel.10116
novel.1165	novel.3646	TRINITY_DN11608_c2_g1_i1.path1	TRINITY_DN24307_c0_g1_i1.path1	TRINITY_DN17789_c0_g1_i2.path3
TRINITY_DN6942_c0_g1_i2.path1	novel.3190	Pepsico2_Contig12367.path2	novel.4272	TRINITY_DN6605_c1_g2_i1.path1
novel.6649	Pepsico2_Contig3536.path1	TRINITY_DN24907_c0_g1_i4.path1	TRINITY_DN6812_c1_g1_i11.path1	novel.6114
TRINITY_DN29057_c0_g1_i1.path1	novel.6402	novel.3834	Pepsico1_Contig32360.path1	TRINITY_DN54399_c0_g1_i1.path2
TRINITY_DN16922_c0_g1_i1.path1	TRINITY_DN12408_c0_g2_i2.path1	novel.2911	TRINITY_DN8599_c1_g1_i3.path2	TRINITY_DN22391_c0_g1_i2.path1
novel.6752	Pepsico1_Contig38.path2	novel.9698	Pepsico2_Contig20195.path1	TRINITY_DN24832_c0_g3_i1.path1
TRINITY_DN30417_c0_g1_i2.path1	novel.1114	TRINITY_DN13996_c0_g1_i2.path1	novel.3786	TRINITY_DN39232_c0_g3_i1.path1
TRINITY_DN114306_c0_g1_i1.path1	TRINITY_DN5199_c0_g2_i1.path2	Pepsico1_Contig36864.path2	novel.9553	TRINITY_DN74032_c0_g1_i1.path2
novel.8459	TRINITY_DN9971_c0_g1_i1.path1	novel.4666	novel.4952	novel.8823
novel.6182	novel.3477	novel.2142	Pepsico1_Contig758.path2	Pepsico1_Contig211.path1
TRINITY_DN9851_c0_g1_i1.path1	Pepsico2_Contig11219.path2	novel.386	TRINITY_DN11920_c0_g1_i2.path1	novel.4814
novel.1944	TRINITY_DN40924_c0_g1_i4.path1	novel.1795	Pepsico1_Contig6661.path2	TRINITY_DN12386_c0_g2_i1.path1
novel.9392	novel.8203	novel.3664	TRINITY_DN931_c0_g2_i2.path1	novel.3595
TRINITY_DN9250_c1_g1_i1.path1	Pepsico2_Contig20289.path1	novel.3762	TRINITY_DN8862_c2_g1_i8.path2	novel.3651
TRINITY_DN8753_c0_g1_i3.path1	novel.6157	TRINITY_DN5865_c0_g2_i1.path1	Pepsico2_Contig10882.path2	TRINITY_DN111530_c0_g1_i1.path2
novel.7630	novel.4542	novel.5276	TRINITY_DN31113_c0_g3_i2.path1	Pepsico2_Contig8532.path1
TRINITY_DN21706_c0_g1_i3.path2	novel.6159	novel.5970	TRINITY_DN4340_c0_g3_i1.path1	TRINITY_DN6605_c1_g4_i2.path1
Pepsico2_Contig17102.path1	novel.375	TRINITY_DN6047_c1_g1_i1.path1	TRINITY_DN6419_c0_g1_i9.path1	TRINITY_DN35396_c0_g1_i2.path2
novel.1711	novel.10180	TRINITY_DN40822_c0_g1_i1.path2	Pepsico2_Contig16302.path2	TRINITY_DN2548_c0_g1_i5.path1
Pepsico2_Contig14330.path1	novel.6216	novel.2888	novel.9787	novel.7833
TRINITY_DN3986_c0_g1_i1.path1	TRINITY_DN102817_c0_g1_i1.path1	TRINITY_DN13294_c0_g1_i1.path1	TRINITY_DN31623_c1_g1_i1.path1	TRINITY_DN59745_c0_g1_i1.path1
TRINITY_DN59894_c0_g1_i1.path1	TRINITY_DN52949_c0_g1_i1.path1	novel.2098	TRINITY_DN12145_c0_g1_i1.path1	novel.8743
TRINITY_DN9998_c0_g2_i1.path1	novel.6165	novel.1283	TRINITY_DN9796_c0_g1_i1.path1	Pepsico2_Contig19460.path2
TRINITY_DN23242_c0_g2_i5.path1	novel.3781	TRINITY_DN22077_c0_g1_i12.path2	novel.1736	novel.3253
TRINITY_DN16565_c0_g1_i1.path1	TRINITY_DN13591_c0_g1_i5.path1	TRINITY_DN24832_c0_g2_i4.path1	TRINITY_DN3394_c1_g2_i1.path1	Pepsico2_Contig4524.path1
TRINITY_DN4942_c0_g1_i2.path1	TRINITY_DN5491_c1_g5_i1.path1	novel.9787	Pepsico2_Contig16273.path2	TRINITY_DN33567_c0_g1_i1.path2
TRINITY_DN34009_c0_g1_i1.path1	TRINITY_DN6533_c0_g1_i1.path1	novel.2833	novel.1576	Pepsico1_Contig672.path2
TRINITY_DN6565_c0_g1_i3.path1	Pepsico2_Contig9614.path3	TRINITY_DN31456_c0_g2_i4.path2	TRINITY_DN3601_c0_g1_i1.path2	Pepsico2_Contig6644.path1
novel.5961	TRINITY_DN7335_c0_g1_i7.path1	TRINITY_DN33567_c0_g1_i1.path2	novel.4101	novel.1535
novel.8672	TRINITY_DN27567_c0_g1_i1.path1	TRINITY_DN79208_c0_g1_i1.path1	TRINITY_DN28069_c0_g1_i5.path1	Pepsico1_Contig7022.path1
novel.10055	novel.4835	novel.9391	novel.9461	Pepsico1_Contig26.path1
TRINITY_DN14211_c0_g1_i3.path1	TRINITY_DN8969_c0_g1_i5.path2	TRINITY_DN7514_c0_g1_i3.path2	novel.4234	novel.2725
novel.774	TRINITY_DN27067_c1_g1_i1.path1	Pepsico1_Contig1822.path1	TRINITY_DN89105_c0_g1_i1.path1	TRINITY_DN68790_c0_g1_i1.path1
Pepsico2_Contig8286.path1	TRINITY_DN4261_c0_g1_i2.path1	novel.324	TRINITY_DN19935_c0_g1_i10.path1	TRINITY_DN9135_c0_g1_i1.path1
Pepsico2_Contig11020.path1	novel.7719	TRINITY_DN6533_c0_g1_i1.path1	TRINITY_DN7242_c0_g2_i1.path1	TRINITY_DN29788_c0_g2_i1.path1
novel.6106	TRINITY_DN49221_c0_g1_i1.path1	TRINITY_DN13624_c0_g1_i5.path1	novel.4666	novel.6527
novel.9461	Pepsico1_Contig3350.path1	novel.6216	TRINITY_DN2867_c0_g1_i4.path2	Pepsico2_Contig20774.path2
TRINITY_DN28719_c0_g4_i1.path1	Pepsico2_Contig3417.path2	novel.4793	novel.6080	TRINITY_DN29879_c0_g1_i4.path1
TRINITY_DN83410_c0_g1_i1.path1	novel.4772	novel.6220	novel.9873	novel.6098
novel.7383	novel.8492	TRINITY_DN35061_c1_g1_i2.path1	TRINITY_DN22689_c0_g1_i1.path1	TRINITY_DN35638_c0_g1_i4.path2
TRINITY_DN14274_c1_g1_i7.path2	Pepsico1_Contig26654.path1	novel.4645	TRINITY_DN20918_c0_g3_i1.path1	Pepsico1_Contig33288.path1
novel.9476	novel.51	novel.159	novel.994	Pepsico1_Contig3957.path1
novel.6058	Pepsico2_Contig4918.path1	novel.9227	novel.1142	novel.8341
novel.6965	novel.3040	novel.1419	novel.8780	novel.4643
TRINITY_DN18409_c0_g3_i1.path1	Pepsico1_Contig28824.path2	Pepsico2_Contig5745.path1	TRINITY_DN24114_c0_g1_i2.path1	TRINITY_DN57429_c0_g1_i1.path1
TRINITY_DN21011_c0_g1_i7.path1	novel.3941	novel.6209	TRINITY_DN12254_c0_g1_i1.path1	Pepsico2_Contig12221.path2
Pepsico1_Contig28299.path1	Pepsico1_Contig4053.path1	Pepsico2_Contig14449.path1	TRINITY_DN19732_c1_g1_i2.path1	novel.1419
TRINITY_DN15500_c0_g1_i3.path1	TRINITY_DN7614_c1_g2_i1.path1	TRINITY_DN10664_c1_g6_i1.path2	TRINITY_DN5245_c0_g1_i2.path1	TRINITY_DN9250_c1_g1_i1.path2
TRINITY_DN7242_c0_g2_i1.path1	Pepsico2_Contig2978.path2	Pepsico2_Contig16986.path2	TRINITY_DN32690_c0_g2_i1.path1	novel.9354
Pepsico2_Contig17265.path1	TRINITY_DN3106_c1_g1_i1.path1	novel.210	TRINITY_DN39677_c0_g1_i1.path1	novel.7677
novel.7113	TRINITY_DN4139_c0_g1_i1.path1	TRINITY_DN11705_c0_g1_i1.path1	novel.10525	Pepsico2_Contig11038.path1
novel.4879	TRINITY_DN14095_c0_g1_i2.path1	Pepsico2_Contig18206.path2	Pepsico1_Contig264.path1	novel.9391
novel.10363	TRINITY_DN9396_c0_g1_i1.path2	novel.8977	novel.10105	TRINITY_DN19219_c0_g1_i1.path1
novel.213	novel.2959	novel.3378	TRINITY_DN19092_c0_g1_i1.path1	novel.2290
novel.346	TRINITY_DN10575_c0_g2_i1.path1	TRINITY_DN30461_c0_g1_i14.path1	novel.8071	novel.4471
Pepsico2_Contig2961.path1	novel.5859	TRINITY_DN89105_c0_g1_i1.path1	novel.7674	novel.10042
Pepsico2_Contig19444.path1	TRINITY_DN10654_c0_g3_i2.path1	Pepsico2_Contig14533.path1	novel.8079	novel.2734
novel.5911	TRINITY_DN13881_c0_g2_i8.path2	novel.9610	TRINITY_DN5491_c0_g1_i3.path1	Pepsico1_Contig3802.path1
TRINITY_DN225_c2_g1_i11.path1	TRINITY_DN16555_c0_g1_i2.path1	novel.3477	TRINITY_DN30743_c0_g1_i1.path1	TRINITY_DN17128_c0_g1_i1.path1
novel.10228	novel.7326	TRINITY_DN57903_c0_g2_i1.path5	novel.2888	TRINITY_DN14427_c1_g1_i1.path1
Pepsico2_Contig5323.path1	novel.7988	Pepsico2_Contig3549.path1	TRINITY_DN7333_c1_g1_i4.path1	TRINITY_DN9250_c1_g1_i1.path1
novel.7547	novel.2530	novel.8997	novel.10201	novel.347
novel.6356	novel.5865	Pepsico1_Contig34834.path3	Pepsico1_Contig1180.path1	TRINITY_DN5752_c0_g1_i1.path1
novel.2959	TRINITY_DN17793_c0_g3_i2.path1	Pepsico2_Contig19697.path1	Pepsico2_Contig337.path1	Pepsico1_Contig36309.path2
Pepsico2_Contig14892.path2	novel.8652	novel.8928	novel.7098	TRINITY_DN8599_c1_g1_i3.path2
novel.3766	novel.6138	Pepsico1_Contig2258.path2	Pepsico2_Contig10790.path1	TRINITY_DN1258_c0_g9_i1.path1
novel.9393	TRINITY_DN6605_c1_g1_i5.path2	novel.2962	Pepsico2_Contig441.path1	TRINITY_DN26562_c0_g2_i1.path1
novel.1538	Pepsico2_Contig9426.path1	novel.3186	novel.2728	novel.7770
novel.3291	novel.5180	TRINITY_DN25384_c0_g1_i1.path1	novel.4731	novel.5267
Pepsico2_Contig16925.path1	Pepsico1_Contig3957.path1	TRINITY_DN6228_c0_g3_i1.path1	TRINITY_DN16260_c0_g5_i1.path1	novel.9955
TRINITY_DN9851_c0_g1_i1.path2	novel.210	novel.9349	TRINITY_DN2760_c0_g1_i8.path1	TRINITY_DN6513_c0_g2_i1.path1
TRINITY_DN97971_c0_g1_i1.path1	Pepsico1_Contig7725.path1	TRINITY_DN9891_c0_g4_i1.path2	Pepsico1_Contig7017.path2	novel.6808
novel.3765	Pepsico2_Contig7708.path1	TRINITY_DN11709_c0_g1_i4.path2	novel.2637	novel.9393
novel.1374	TRINITY_DN22560_c0_g1_i4.path1	TRINITY_DN13842_c0_g2_i2.path1	TRINITY_DN11148_c0_g2_i1.path1	novel.7766
novel.8673	TRINITY_DN12383_c0_g1_i2.path1	novel.566	novel.8846	TRINITY_DN7072_c0_g2_i1.path1
novel.3004	TRINITY_DN9250_c1_g1_i1.path2	TRINITY_DN26763_c0_g1_i1.path1	novel.10248	novel.4765
TRINITY_DN98696_c0_g1_i1.path1	novel.3212	TRINITY_DN11615_c0_g1_i1.path1	novel.5034	Pepsico2_Contig6342.path1
novel.3253	TRINITY_DN25005_c0_g1_i1.path1	novel.4731	Pepsico1_Contig421.path1	Pepsico2_Contig13875.path1
novel.8176	novel.8178	Pepsico2_Contig31.path1	Pepsico2_Contig2890.path1	TRINITY_DN92905_c0_g1_i1.path2
novel.8195	TRINITY_DN18638_c0_g1_i1.path1	novel.5253	novel.7383	novel.6806
TRINITY_DN10556_c0_g1_i1.path1	TRINITY_DN3601_c0_g1_i1.path2	novel.10308	novel.6355	Pepsico1_Contig1795.path1
novel.6229	novel.680	novel.7695	TRINITY_DN17850_c2_g1_i1.path1	Pepsico2_Contig12731.path1
novel.5163	Pepsico2_Contig16540.path1	novel.6925	novel.6855	novel.3221
Pepsico2_Contig7855.path1	TRINITY_DN16922_c0_g1_i1.path1	TRINITY_DN7691_c0_g4_i1.path1	TRINITY_DN4261_c0_g1_i2.path1	novel.67
novel.10043	novel.7004	TRINITY_DN26074_c0_g1_i1.path1	novel.10147	Pepsico2_Contig8195.path2
novel.1708	novel.4484	novel.1356	Pepsico1_Contig3957.path1	TRINITY_DN26115_c0_g2_i3.path1
novel.473	TRINITY_DN34274_c0_g1_i1.path1	novel.10032	Pepsico1_Contig7763.path1	novel.9699
novel.3962	TRINITY_DN20136_c1_g1_i1.path3	novel.4371	novel.9972	novel.5878
TRINITY_DN71109_c0_g1_i1.path2	novel.10251	novel.403	TRINITY_DN25777_c0_g1_i1.path2	novel.7299
novel.315	TRINITY_DN81975_c0_g1_i1.path1	TRINITY_DN13914_c0_g1_i2.path1	TRINITY_DN12062_c0_g3_i1.path1	TRINITY_DN12913_c0_g4_i1.path1
Pepsico2_Contig12326.path2	TRINITY_DN49890_c0_g1_i1.path1	novel.5257	Pepsico1_Contig6507.path1	Pepsico2_Contig16540.path1
novel.7326	Pepsico2_Contig12951.path1	TRINITY_DN5491_c1_g5_i1.path1	TRINITY_DN10815_c0_g1_i1.path1	TRINITY_DN18326_c0_g1_i2.path1
Pepsico2_Contig15428.path1	TRINITY_DN26763_c0_g1_i1.path1	TRINITY_DN30626_c0_g1_i1.path1	TRINITY_DN13842_c0_g2_i2.path1	novel.2648
novel.2557	TRINITY_DN75610_c0_g1_i1.path1	TRINITY_DN55735_c1_g1_i1.path1	novel.5911	novel.7506
Pepsico2_Contig14015.path1	Pepsico2_Contig19245.path1	novel.1719	novel.8055	TRINITY_DN17278_c1_g1_i1.path1
Pepsico2_Contig17380.path1	TRINITY_DN12703_c0_g2_i1.path1	TRINITY_DN20153_c1_g1_i1.path1	TRINITY_DN215_c0_g4_i1.path1	novel.7949
Pepsico1_Contig37105.path1	TRINITY_DN11130_c0_g1_i11.path1	TRINITY_DN13349_c0_g1_i9.path1	TRINITY_DN14685_c0_g1_i1.path1	TRINITY_DN11076_c0_g1_i1.path2
Pepsico2_Contig18009.path1	TRINITY_DN106836_c0_g1_i1.path1	TRINITY_DN97436_c0_g1_i1.path1	novel.10223	novel.313
TRINITY_DN5732_c0_g1_i3.path2	TRINITY_DN33567_c0_g1_i1.path2	TRINITY_DN4789_c0_g1_i1.path3	novel.3198	TRINITY_DN27142_c0_g2_i1.path1
TRINITY_DN34274_c0_g1_i1.path1	TRINITY_DN28234_c1_g1_i1.path1	novel.8178	TRINITY_DN727_c0_g3_i1.path2	Pepsico1_Contig1872.path2
TRINITY_DN112475_c0_g1_i1.path1	novel.4051	TRINITY_DN2038_c0_g1_i6.path1	novel.1381	novel.6807
TRINITY_DN102817_c0_g1_i1.path1	novel.1226	novel.2808	novel.5964	novel.10352
Pepsico1_Contig14374.path1	TRINITY_DN17687_c0_g2_i2.path1	novel.979	novel.10115	TRINITY_DN29163_c0_g5_i1.path1
novel.8936	novel.9349	TRINITY_DN37142_c0_g1_i1.path2	TRINITY_DN8471_c0_g2_i2.path1	novel.2007
novel.342	TRINITY_DN17993_c0_g1_i5.path1	TRINITY_DN27841_c0_g1_i1.path1	TRINITY_DN16719_c1_g2_i2.path3	novel.1224
TRINITY_DN25186_c0_g1_i1.path3	novel.1944	novel.6165	novel.299	TRINITY_DN3591_c0_g1_i2.path1
TRINITY_DN31586_c0_g1_i9.path1	novel.4003	novel.7097	novel.5849	TRINITY_DN45789_c0_g1_i1.path1
TRINITY_DN12620_c0_g1_i2.path3	TRINITY_DN9891_c0_g4_i1.path2	Pepsico1_Contig1382.path2	novel.5878	Pepsico2_Contig2180.path1
TRINITY_DN10891_c1_g1_i1.path2	TRINITY_DN111692_c0_g1_i1.path1	novel.7251	novel.9940	TRINITY_DN9260_c0_g1_i7.path2
TRINITY_DN11880_c0_g1_i1.path3	TRINITY_DN4719_c0_g1_i3.path2	novel.197	Pepsico1_Contig2723.path1	TRINITY_DN79182_c0_g1_i1.path1
Pepsico1_Contig34834.path3	novel.6992	TRINITY_DN9971_c0_g1_i1.path1	TRINITY_DN12320_c0_g1_i2.path1	novel.10326
Pepsico1_Contig4996.path1	TRINITY_DN53024_c0_g1_i1.path1	TRINITY_DN6932_c0_g1_i3.path1	novel.2530	novel.2911
TRINITY_DN17093_c0_g1_i1.path2	TRINITY_DN9250_c1_g1_i1.path1	TRINITY_DN9509_c0_g1_i4.path1	TRINITY_DN7355_c0_g1_i2.path2	novel.1361
novel.5257	novel.1935	TRINITY_DN10806_c1_g1_i1.path1	TRINITY_DN4463_c2_g2_i2.path3	TRINITY_DN10416_c0_g2_i1.path1
TRINITY_DN33725_c0_g1_i2.path1	novel.1387	TRINITY_DN8779_c0_g2_i3.path2	Pepsico2_Contig14708.path1	Pepsico2_Contig646.path1
Pepsico2_Contig16925.path2	novel.8690	novel.3033	Pepsico1_Contig5775.path1	TRINITY_DN52949_c0_g1_i1.path1
TRINITY_DN31463_c0_g1_i1.path1	novel.10308	TRINITY_DN43549_c0_g1_i1.path2	Pepsico2_Contig7639.path1	TRINITY_DN9829_c0_g1_i3.path1
TRINITY_DN4769_c0_g1_i5.path2	novel.8746	novel.2530	TRINITY_DN6342_c0_g1_i1.path1	novel.7165
TRINITY_DN30268_c0_g3_i2.path1	TRINITY_DN1697_c0_g1_i1.path2	TRINITY_DN7934_c2_g1_i7.path1	novel.2881	TRINITY_DN17584_c0_g2_i6.path1
TRINITY_DN30892_c0_g1_i1.path1	novel.403	TRINITY_DN9250_c1_g1_i1.path1	novel.9699	novel.9881
TRINITY_DN9250_c1_g1_i1.path2	TRINITY_DN3180_c0_g2_i1.path2	TRINITY_DN20744_c0_g1_i2.path2	novel.8195	TRINITY_DN26107_c0_g1_i2.path1
TRINITY_DN79265_c0_g1_i1.path1	TRINITY_DN31855_c0_g1_i2.path2	novel.2441	TRINITY_DN6057_c0_g1_i2.path1	Pepsico1_Contig6150.path1
TRINITY_DN5122_c0_g1_i5.path1	TRINITY_DN51625_c0_g1_i1.path1	TRINITY_DN12408_c0_g2_i2.path1	novel.1384	TRINITY_DN7797_c0_g1_i2.path1
novel.6045	novel.3291	novel.5969	novel.5528	TRINITY_DN12218_c0_g1_i4.path2
novel.8572	novel.5064	TRINITY_DN33640_c0_g3_i1.path1	novel.7944	TRINITY_DN29732_c0_g1_i1.path1
TRINITY_DN41519_c0_g1_i1.path1	novel.1466	novel.6472	novel.9847	TRINITY_DN1843_c0_g1_i4.path1
TRINITY_DN40112_c0_g1_i1.path1	novel.2647	novel.5267	TRINITY_DN17932_c0_g2_i5.path2	TRINITY_DN49221_c0_g1_i1.path1
novel.9029	novel.8672	novel.10352	TRINITY_DN26672_c1_g1_i7.path1	TRINITY_DN32665_c0_g1_i1.path1
TRINITY_DN41641_c0_g1_i2.path1	novel.392	TRINITY_DN44861_c0_g1_i1.path1	Pepsico2_Contig11063.path1	novel.210
novel.5330	TRINITY_DN107989_c0_g1_i1.path1	Pepsico2_Contig17568.path1	TRINITY_DN26530_c1_g1_i1.path2	novel.1201
TRINITY_DN74782_c0_g1_i1.path1	novel.6220	novel.5862	novel.5885	novel.79
TRINITY_DN26957_c0_g1_i1.path1	TRINITY_DN31586_c0_g1_i9.path1	TRINITY_DN12386_c0_g2_i1.path1	novel.8673	TRINITY_DN29573_c0_g1_i8.path1
novel.5020	Pepsico1_Contig3448.path1	Pepsico1_Contig11308.path2	novel.4448	novel.2966
TRINITY_DN2518_c0_g1_i3.path1	TRINITY_DN9600_c0_g1_i1.path1	TRINITY_DN47113_c0_g3_i1.path1	novel.6787	novel.8322
novel.6199	TRINITY_DN14667_c0_g2_i5.path2	Pepsico1_Contig6988.path1	TRINITY_DN42792_c0_g4_i1.path1	TRINITY_DN79673_c0_g1_i1.path1
TRINITY_DN80506_c0_g1_i1.path1	TRINITY_DN6932_c0_g1_i3.path1	novel.4584	novel.9397	TRINITY_DN53548_c0_g1_i1.path1
TRINITY_DN11598_c0_g1_i1.path1	novel.1419	novel.2682	TRINITY_DN34205_c0_g1_i1.path2	TRINITY_DN30461_c0_g1_i14.path1
novel.2490	novel.6079	novel.8322	TRINITY_DN38837_c0_g2_i3.path1	Pepsico2_Contig14269.path1
novel.7466	novel.862	novel.2968	novel.1702	Pepsico2_Contig19574.path1
Pepsico1_Contig24342.path2	novel.5974	Pepsico2_Contig12443.path1	Pepsico1_Contig37847.path1	novel.5147
Pepsico2_Contig17548.path1	novel.2990	TRINITY_DN111692_c0_g1_i1.path3	Pepsico1_Contig3830.path1	Pepsico1_Contig6988.path1
Pepsico2_Contig2978.path2	novel.5177	novel.6260	novel.1836	novel.9872
novel.10518	TRINITY_DN13624_c0_g1_i5.path1	novel.1527	Pepsico1_Contig14374.path1	TRINITY_DN43845_c0_g1_i13.path1
TRINITY_DN8659_c0_g2_i1.path1	novel.2682	novel.7833	novel.8962	novel.7728
novel.2911	novel.7453	novel.1702	novel.4577	novel.3560
Pepsico2_Contig7732.path2	Pepsico2_Contig4472.path1	novel.10536	Pepsico2_Contig16813.path2	TRINITY_DN19203_c0_g1_i2.path1
Pepsico1_Contig1878.path1	TRINITY_DN42581_c0_g1_i1.path1	TRINITY_DN35396_c0_g1_i2.path2	TRINITY_DN6436_c0_g1_i2.path1	TRINITY_DN4942_c0_g1_i2.path1
TRINITY_DN6846_c1_g1_i1.path1	novel.1905	novel.1390	novel.7630	TRINITY_DN19135_c0_g3_i1.path1
novel.3159	Pepsico1_Contig1025.path1	novel.1477	Pepsico2_Contig2408.path3	TRINITY_DN15509_c1_g1_i2.path1
novel.1294	novel.4879	novel.4787	TRINITY_DN2111_c0_g1_i1.path1	novel.7288
TRINITY_DN24094_c0_g1_i2.path1	novel.6239	novel.6206	novel.3302	TRINITY_DN2657_c0_g1_i2.path1
novel.9387	novel.7466	novel.5390	TRINITY_DN8704_c0_g1_i2.path1	novel.10349
novel.6330	novel.10055	TRINITY_DN15790_c0_g1_i3.path2	TRINITY_DN14523_c0_g1_i1.path1	novel.1691
novel.10325	TRINITY_DN19898_c0_g5_i2.path1	TRINITY_DN7072_c5_g1_i2.path1	TRINITY_DN1019_c0_g2_i1.path2	TRINITY_DN34473_c0_g1_i1.path3
TRINITY_DN7797_c0_g1_i2.path1	novel.6037	novel.9627	novel.79	novel.2856
TRINITY_DN12917_c0_g1_i1.path1	Pepsico2_Contig14420.path1	TRINITY_DN52375_c0_g1_i2.path1	novel.1440	novel.4543
TRINITY_DN21343_c0_g1_i4.path2	Pepsico1_Contig7353.path1	Pepsico2_Contig4950.path1	TRINITY_DN4769_c0_g1_i5.path2	Pepsico2_Contig12616.path1
novel.2990	novel.1711	TRINITY_DN2846_c0_g1_i1.path1	TRINITY_DN7127_c0_g1_i1.path1	TRINITY_DN40822_c0_g1_i1.path2
novel.215	novel.6941	novel.10234	novel.1717	Pepsico1_Contig7140.path1
novel.349	novel.346	TRINITY_DN31586_c0_g1_i9.path1	TRINITY_DN40924_c0_g1_i4.path1	novel.6382
TRINITY_DN6293_c0_g1_i1.path1	TRINITY_DN30929_c0_g1_i2.path1	TRINITY_DN8587_c1_g1_i1.path1	TRINITY_DN39187_c0_g2_i1.path1	novel.5330
novel.6583	novel.10352	Pepsico1_Contig2484.path1	Pepsico2_Contig6725.path2	novel.2751
novel.426	novel.324	Pepsico1_Contig2110.path2	TRINITY_DN1502_c0_g1_i2.path1	Pepsico1_Contig3210.path1
novel.7235	TRINITY_DN109518_c0_g1_i1.path3	TRINITY_DN5322_c0_g2_i1.path1	novel.7121	TRINITY_DN15966_c0_g1_i1.path1
novel.5865	TRINITY_DN15509_c1_g1_i2.path1	novel.4191	Pepsico2_Contig7946.path1	TRINITY_DN66384_c0_g1_i1.path1
Pepsico2_Contig2180.path1	novel.5452	Pepsico2_Contig11843.path1	novel.7739	novel.2527
novel.3428	TRINITY_DN10664_c1_g6_i1.path2	TRINITY_DN3394_c1_g2_i1.path1	TRINITY_DN10654_c0_g3_i2.path1	Pepsico2_Contig14015.path1
novel.4793	novel.8920	TRINITY_DN26449_c0_g1_i1.path2	TRINITY_DN7993_c0_g1_i8.path1	TRINITY_DN26751_c0_g1_i2.path1
Pepsico2_Contig2154.path1	novel.8001	novel.50	Pepsico1_Contig4650.path1	novel.4829
novel.3688	TRINITY_DN21149_c0_g3_i1.path1	TRINITY_DN6606_c0_g1_i1.path2	novel.10180	novel.6231
TRINITY_DN21044_c2_g1_i1.path4	novel.7251	TRINITY_DN18513_c0_g1_i1.path1	TRINITY_DN3337_c1_g1_i2.path2	novel.10234
TRINITY_DN9653_c0_g2_i1.path1	TRINITY_DN25777_c0_g1_i1.path2	novel.7289	novel.5975	Pepsico2_Contig20220.path1
Pepsico2_Contig16486.path1	novel.10078	novel.620	novel.9476	novel.5600
novel.6333	novel.1702	TRINITY_DN20723_c1_g1_i1.path1	TRINITY_DN45056_c0_g2_i1.path1	TRINITY_DN38440_c0_g1_i2.path1
TRINITY_DN23116_c0_g1_i1.path1	TRINITY_DN22405_c0_g2_i1.path2	Pepsico2_Contig5409.path1	novel.6806	novel.29
TRINITY_DN11897_c0_g1_i1.path2	TRINITY_DN20723_c1_g1_i1.path1	TRINITY_DN15509_c1_g1_i2.path1	novel.5633	TRINITY_DN13914_c0_g1_i2.path1
novel.3212	novel.2690	novel.6247	novel.7732	novel.2962
novel.6187	TRINITY_DN10556_c0_g1_i1.path1	novel.1116	novel.1488	Pepsico1_Contig16695.path1
novel.8387	novel.7658	novel.10554	novel.6141	TRINITY_DN11130_c0_g1_i11.path1
TRINITY_DN7703_c1_g1_i1.path2	TRINITY_DN26545_c0_g1_i1.path2	novel.7424	Pepsico2_Contig16352.path2	novel.3640
TRINITY_DN18286_c0_g1_i1.path2	TRINITY_DN97436_c0_g1_i1.path1	TRINITY_DN13332_c0_g1_i6.path1	TRINITY_DN52949_c0_g1_i1.path1	TRINITY_DN4538_c0_g1_i3.path2
TRINITY_DN28605_c0_g3_i3.path1	Pepsico2_Contig7732.path2	TRINITY_DN22284_c0_g2_i1.path1	novel.6224	Pepsico1_Contig886.path1
Pepsico2_Contig7319.path1	TRINITY_DN71897_c0_g1_i1.path1	Pepsico1_Contig37386.path1	TRINITY_DN28406_c0_g1_i5.path1	Pepsico2_Contig20590.path1
TRINITY_DN98034_c0_g1_i1.path2	TRINITY_DN3886_c0_g1_i7.path2	novel.1840	Pepsico2_Contig17466.path1	novel.9015
TRINITY_DN11130_c0_g1_i11.path1	novel.6928	TRINITY_DN12383_c0_g1_i2.path1	Pepsico2_Contig1052.path1	TRINITY_DN16555_c0_g1_i2.path1
novel.9338	TRINITY_DN6436_c0_g1_i2.path1	TRINITY_DN31317_c1_g1_i2.path1	TRINITY_DN23152_c0_g1_i1.path1	novel.4541
novel.10538	Pepsico1_Contig2142.path1	novel.1050	novel.1935	novel.7301
novel.8663	TRINITY_DN23079_c0_g1_i1.path1	TRINITY_DN26672_c1_g2_i2.path1	Pepsico1_Contig2134.path1	novel.6239
novel.6380	novel.5598	novel.3159	TRINITY_DN40419_c0_g1_i1.path1	novel.7294
Pepsico1_Contig33634.path1	TRINITY_DN30892_c0_g1_i1.path1	TRINITY_DN10718_c0_g4_i1.path1	TRINITY_DN13168_c0_g1_i1.path1	novel.1387
Pepsico2_Contig17130.path1	TRINITY_DN10323_c0_g1_i5.path1	novel.3199	novel.6382	novel.9627
novel.3186	novel.6182	novel.8632	TRINITY_DN8469_c0_g1_i11.path1	TRINITY_DN11668_c0_g1_i19.path1
Pepsico2_Contig14796.path1	TRINITY_DN11057_c0_g2_i1.path2	novel.1140	novel.8741	Pepsico2_Contig9071.path1
TRINITY_DN66437_c0_g1_i1.path1	TRINITY_DN25788_c0_g1_i1.path2	Pepsico1_Contig26654.path1	Pepsico1_Contig33914.path1	TRINITY_DN21706_c0_g1_i3.path2
TRINITY_DN8587_c1_g1_i1.path1	novel.9391	Pepsico2_Contig11484.path2	novel.1919	TRINITY_DN88081_c0_g1_i1.path1
TRINITY_DN36403_c0_g4_i2.path1	Pepsico2_Contig19917.path4	novel.5451	Pepsico2_Contig9970.path1	novel.2871
novel.7772	novel.4765	TRINITY_DN13591_c0_g1_i5.path1	novel.9867	TRINITY_DN85435_c0_g1_i1.path1
Pepsico2_Contig20015.path1	TRINITY_DN33054_c4_g1_i1.path4	novel.148	TRINITY_DN15185_c0_g3_i5.path2	novel.3434
TRINITY_DN69493_c0_g1_i1.path1	novel.1806	novel.5598	Pepsico1_Contig1631.path1	TRINITY_DN22549_c0_g2_i1.path1
TRINITY_DN21332_c0_g2_i2.path1	TRINITY_DN17100_c0_g1_i12.path1	novel.375	novel.4003	novel.6121
novel.229	TRINITY_DN53995_c0_g1_i1.path1	novel.10325	TRINITY_DN20226_c0_g1_i3.path1	TRINITY_DN27826_c0_g1_i1.path1
novel.4344	TRINITY_DN59894_c0_g1_i1.path1	Pepsico2_Contig8385.path1	Pepsico2_Contig3263.path1	TRINITY_DN7214_c0_g3_i2.path1
Pepsico2_Contig14557.path1	novel.2160	Pepsico2_Contig20349.path1	novel.9851	Pepsico2_Contig11063.path1
TRINITY_DN8599_c1_g1_i3.path3	Pepsico2_Contig19479.path1	novel.9528	TRINITY_DN39232_c0_g3_i1.path1	TRINITY_DN30931_c0_g2_i1.path1
novel.5798	Pepsico1_Contig7054.path2	novel.8746	TRINITY_DN16607_c0_g4_i3.path3	TRINITY_DN10873_c0_g2_i1.path1
novel.6334	TRINITY_DN69_c2_g1_i1.path1	TRINITY_DN84546_c0_g1_i1.path1	novel.7428	TRINITY_DN31586_c0_g1_i9.path1
TRINITY_DN9300_c0_g1_i5.path3	Pepsico2_Contig11020.path1	TRINITY_DN39067_c0_g1_i1.path1	TRINITY_DN12383_c0_g1_i2.path1	Pepsico2_Contig5526.path1
TRINITY_DN7964_c0_g1_i2.path1	Pepsico2_Contig14060.path1	novel.6151	Pepsico2_Contig16486.path1	TRINITY_DN20723_c1_g1_i1.path1
novel.560	novel.10363	TRINITY_DN17371_c0_g1_i18.path3	novel.10329	novel.8142
TRINITY_DN20497_c0_g1_i1.path4	TRINITY_DN23876_c1_g1_i1.path1	TRINITY_DN2854_c0_g1_i1.path1	novel.8145	TRINITY_DN1502_c0_g1_i2.path1
TRINITY_DN4252_c0_g3_i1.path2	TRINITY_DN8916_c0_g2_i1.path1	novel.10363	TRINITY_DN10442_c0_g1_i18.path2	TRINITY_DN24214_c0_g2_i1.path1
TRINITY_DN106711_c0_g1_i1.path1	novel.9029	novel.5859	novel.9393	TRINITY_DN44824_c0_g1_i1.path3
TRINITY_DN19935_c0_g1_i10.path1	novel.7842	novel.6121	TRINITY_DN8648_c0_g1_i4.path2	novel.33
TRINITY_DN48093_c0_g1_i1.path1	TRINITY_DN7645_c0_g1_i2.path1	novel.7113	TRINITY_DN31467_c1_g2_i2.path2	TRINITY_DN15123_c0_g1_i4.path1
TRINITY_DN14711_c1_g4_i1.path1	TRINITY_DN13022_c0_g1_i1.path1	novel.3854	novel.4576	TRINITY_DN27_c3_g1_i1.path1
TRINITY_DN10575_c0_g2_i1.path1	novel.6231	Pepsico1_Contig7140.path1	Pepsico2_Contig12311.path1	TRINITY_DN12396_c0_g1_i1.path1
TRINITY_DN11147_c0_g1_i1.path1	TRINITY_DN22747_c0_g1_i3.path1	Pepsico2_Contig20590.path1	TRINITY_DN225_c2_g1_i11.path1	TRINITY_DN34811_c1_g1_i1.path3
novel.2783	TRINITY_DN40822_c0_g1_i1.path2	TRINITY_DN12254_c0_g1_i1.path1	novel.10193	novel.6334
TRINITY_DN38440_c0_g1_i2.path1	novel.4584	novel.5826	Pepsico2_Contig5323.path1	TRINITY_DN87722_c0_g1_i1.path3
novel.8523	novel.2911	TRINITY_DN1412_c0_g1_i1.path1	Pepsico2_Contig4524.path2	TRINITY_DN23242_c0_g2_i5.path1
novel.6722	Pepsico1_Contig1514.path1	TRINITY_DN20630_c0_g1_i1.path1	novel.6187	Pepsico2_Contig16720.path1
TRINITY_DN88081_c0_g1_i1.path1	Pepsico2_Contig10700.path1	TRINITY_DN115535_c0_g1_i1.path5	Pepsico2_Contig2978.path1	TRINITY_DN22632_c0_g2_i1.path1
TRINITY_DN35396_c0_g1_i2.path2	novel.7630	TRINITY_DN31143_c0_g1_i14.path1	TRINITY_DN20744_c0_g1_i2.path2	TRINITY_DN15032_c0_g1_i1.path2
TRINITY_DN34221_c0_g1_i1.path1	novel.1372	TRINITY_DN2760_c0_g1_i8.path1	TRINITY_DN12019_c0_g1_i3.path1	novel.9486
TRINITY_DN4789_c0_g1_i1.path3	TRINITY_DN16237_c0_g5_i1.path2	TRINITY_DN1122_c0_g4_i2.path2	novel.5180	Pepsico2_Contig3137.path1
TRINITY_DN12218_c0_g1_i4.path1	Pepsico2_Contig14015.path1	novel.3530	novel.4562	novel.4214
TRINITY_DN15215_c0_g1_i1.path1	novel.8697	TRINITY_DN2337_c0_g1_i6.path2	novel.473	Pepsico2_Contig8796.path2
novel.4401	TRINITY_DN20153_c1_g1_i1.path1	TRINITY_DN4027_c0_g5_i1.path1	TRINITY_DN13142_c0_g1_i3.path1	Pepsico2_Contig19872.path1
TRINITY_DN8174_c0_g1_i4.path1	Pepsico2_Contig1721.path1	TRINITY_DN8242_c0_g2_i11.path1	novel.1806	novel.10043
novel.206	novel.8663	novel.5975	novel.3970	novel.6586
TRINITY_DN112208_c0_g1_i1.path1	TRINITY_DN9509_c0_g1_i4.path1	TRINITY_DN102817_c0_g1_i1.path1	novel.1239	novel.10032
novel.9279	novel.3027	novel.3004	TRINITY_DN44901_c0_g1_i1.path1	novel.9808
novel.8485	TRINITY_DN23219_c0_g3_i3.path1	TRINITY_DN32690_c0_g2_i1.path1	novel.10129	TRINITY_DN3806_c0_g1_i1.path2
novel.10519	novel.2781	TRINITY_DN57575_c0_g1_i2.path2	novel.7500	novel.3210
novel.6037	novel.2963	TRINITY_DN25461_c0_g1_i1.path2	novel.1389	novel.9827
novel.7294	TRINITY_DN18488_c0_g1_i1.path1	novel.6138	novel.8016	novel.4029
novel.5616	TRINITY_DN26449_c0_g1_i1.path2	novel.4879	novel.3586	TRINITY_DN65115_c0_g1_i1.path1
Pepsico2_Contig2883.path1	novel.8322	TRINITY_DN27567_c0_g1_i1.path1	novel.3253	TRINITY_DN42988_c0_g1_i2.path1
TRINITY_DN33567_c0_g1_i1.path2	novel.1646	novel.4543	novel.8142	novel.5683
novel.625	Pepsico2_Contig16273.path2	Pepsico2_Contig13814.path1	TRINITY_DN81975_c0_g1_i1.path1	TRINITY_DN26454_c0_g1_i1.path3
TRINITY_DN13624_c0_g1_i5.path1	novel.3414	novel.5974	Pepsico1_Contig211.path1	novel.324
Pepsico2_Contig1343.path2	novel.10325	Pepsico2_Contig7708.path1	novel.6239	TRINITY_DN4769_c0_g1_i5.path2
Pepsico1_Contig1479.path1	TRINITY_DN13294_c0_g1_i1.path1	TRINITY_DN11478_c0_g1_i4.path2	novel.6611	novel.10504
TRINITY_DN7064_c1_g1_i4.path1	Pepsico1_Contig33288.path1	novel.7847	TRINITY_DN6181_c1_g1_i1.path1	TRINITY_DN3070_c1_g1_i2.path2
novel.6231	novel.1708	novel.7121	Pepsico1_Contig31918.path2	Pepsico2_Contig8462.path1
novel.5958	novel.9486	TRINITY_DN74032_c0_g1_i1.path2	TRINITY_DN28718_c0_g1_i7.path2	TRINITY_DN84648_c0_g1_i1.path2
novel.3762	novel.5813	TRINITY_DN61850_c0_g1_i1.path2	novel.8672	TRINITY_DN15198_c0_g1_i2.path2
TRINITY_DN16555_c0_g1_i2.path1	novel.4897	novel.3027	TRINITY_DN7645_c0_g1_i2.path1	TRINITY_DN108478_c0_g1_i1.path4
Pepsico2_Contig15312.path1	TRINITY_DN249_c1_g1_i1.path1	TRINITY_DN25556_c0_g2_i1.path1	TRINITY_DN16966_c0_g2_i1.path1	novel.1905
novel.6234	TRINITY_DN61508_c0_g1_i1.path1	Pepsico1_Contig5984.path1	novel.10296	novel.4259
TRINITY_DN4456_c0_g2_i10.path3	TRINITY_DN30714_c0_g1_i2.path1	TRINITY_DN22613_c0_g1_i2.path1	novel.10117	TRINITY_DN13591_c0_g1_i5.path1
TRINITY_DN6605_c1_g1_i5.path2	TRINITY_DN8862_c2_g1_i8.path2	TRINITY_DN42581_c0_g1_i1.path1	novel.5330	Pepsico2_Contig14058.path1
Pepsico1_Contig7054.path2	novel.4444	novel.7368	TRINITY_DN88081_c0_g1_i1.path1	novel.133
novel.2965	Pepsico2_Contig20721.path1	TRINITY_DN33054_c4_g1_i1.path4	TRINITY_DN35396_c0_g1_i2.path2	TRINITY_DN37599_c0_g1_i2.path1
novel.8997	novel.9393	novel.2455	TRINITY_DN23256_c0_g1_i1.path1	novel.787
TRINITY_DN8622_c0_g1_i2.path1	TRINITY_DN80711_c0_g1_i1.path3	novel.103	novel.4172	TRINITY_DN9335_c0_g1_i7.path2
TRINITY_DN6513_c0_g2_i1.path1	TRINITY_DN15073_c0_g1_i2.path1	TRINITY_DN11130_c0_g1_i11.path1	TRINITY_DN18254_c0_g1_i1.path1	TRINITY_DN11869_c0_g1_i1.path1
TRINITY_DN7614_c1_g2_i1.path1	TRINITY_DN37898_c0_g1_i2.path1	novel.5923	novel.5020	TRINITY_DN10990_c0_g2_i1.path2
TRINITY_DN18035_c0_g2_i2.path1	novel.3186	TRINITY_DN10990_c0_g2_i1.path2	TRINITY_DN4027_c0_g5_i1.path2	TRINITY_DN9653_c0_g2_i1.path1
TRINITY_DN61511_c1_g1_i1.path1	novel.7677	TRINITY_DN9377_c0_g5_i1.path1	novel.862	TRINITY_DN37142_c0_g1_i1.path2
novel.6209	novel.7695	novel.5885	TRINITY_DN78657_c0_g1_i1.path1	TRINITY_DN4606_c0_g2_i1.path1
Pepsico2_Contig13278.path1	TRINITY_DN28605_c0_g3_i3.path1	TRINITY_DN9289_c0_g1_i1.path1	novel.9676	novel.8
novel.5071	TRINITY_DN2337_c0_g1_i6.path2	Pepsico1_Contig30037.path1	TRINITY_DN31207_c0_g1_i1.path1	TRINITY_DN37492_c0_g1_i1.path1
novel.375	TRINITY_DN84546_c0_g1_i1.path1	novel.7158	Pepsico2_Contig909.path1	TRINITY_DN24742_c0_g3_i1.path2
TRINITY_DN8469_c0_g1_i11.path1	novel.3126	novel.3190	novel.7457	novel.267
Pepsico2_Contig19271.path1	novel.3688	novel.6375	TRINITY_DN68113_c0_g1_i1.path1	novel.9130
novel.3196	novel.7650	TRINITY_DN111692_c0_g1_i1.path1	TRINITY_DN69_c2_g1_i1.path1	Pepsico2_Contig11217.path1
TRINITY_DN10477_c1_g1_i6.path2	novel.4836	novel.4200	novel.3430	novel.10251
novel.4680	novel.5798	novel.1466	TRINITY_DN106297_c0_g1_i1.path1	novel.2582
TRINITY_DN16237_c0_g5_i1.path2	novel.8485	novel.12	TRINITY_DN64826_c0_g1_i1.path2	TRINITY_DN101519_c0_g1_i1.path1
TRINITY_DN15183_c0_g1_i1.path2	novel.3253	TRINITY_DN25788_c0_g1_i1.path2	TRINITY_DN27955_c0_g1_i1.path1	TRINITY_DN16922_c0_g1_i1.path1
TRINITY_DN37195_c0_g1_i7.path1	TRINITY_DN13305_c0_g1_i1.path1	TRINITY_DN20136_c1_g1_i1.path3	TRINITY_DN42926_c0_g1_i1.path1	TRINITY_DN20293_c0_g1_i1.path1
TRINITY_DN3208_c0_g1_i1.path2	TRINITY_DN6513_c0_g2_i1.path1	TRINITY_DN2585_c2_g1_i1.path2	Pepsico2_Contig9798.path1	TRINITY_DN36030_c0_g1_i1.path1
TRINITY_DN20542_c1_g1_i1.path1	novel.8387	novel.7927	TRINITY_DN2194_c0_g1_i2.path1	Pepsico2_Contig15179.path1
novel.787	Pepsico1_Contig4828.path2	TRINITY_DN61247_c0_g1_i1.path1	novel.392	Pepsico2_Contig13141.path1
TRINITY_DN17100_c0_g1_i12.path1	novel.942	novel.4279	TRINITY_DN57903_c0_g2_i1.path5	TRINITY_DN10700_c0_g2_i1.path1
TRINITY_DN13591_c0_g1_i5.path1	TRINITY_DN35396_c0_g1_i2.path2	Pepsico2_Contig19897.path2	TRINITY_DN5920_c1_g2_i3.path1	novel.3259
TRINITY_DN6007_c0_g1_i6.path2	novel.6685	TRINITY_DN4954_c0_g2_i1.path2	TRINITY_DN33567_c0_g1_i1.path2	TRINITY_DN21334_c0_g1_i1.path2
TRINITY_DN14667_c0_g2_i5.path2	novel.10201	Pepsico2_Contig19157.path1	novel.10352	TRINITY_DN30714_c0_g1_i2.path1
TRINITY_DN21483_c0_g2_i3.path1	novel.6095	novel.4468	Pepsico2_Contig20289.path1	novel.8387
novel.9015	TRINITY_DN23219_c0_g5_i1.path1	TRINITY_DN27_c3_g1_i1.path1	TRINITY_DN33640_c0_g1_i1.path1	TRINITY_DN10572_c0_g2_i1.path1
TRINITY_DN9602_c0_g2_i2.path1	novel.3430	TRINITY_DN13168_c0_g1_i1.path1	TRINITY_DN37599_c0_g1_i2.path1	Pepsico2_Contig14543.path2
novel.8001	novel.3756	novel.10555	TRINITY_DN71897_c0_g1_i1.path1	TRINITY_DN87130_c0_g1_i1.path1
TRINITY_DN11731_c0_g3_i1.path1	novel.2532	Pepsico2_Contig11020.path1	TRINITY_DN18237_c1_g5_i1.path1	TRINITY_DN9608_c0_g2_i2.path2
novel.3477	novel.3230	TRINITY_DN19684_c1_g1_i1.path1	TRINITY_DN29706_c0_g2_i2.path1	Pepsico1_Contig37885.path1
TRINITY_DN5730_c0_g2_i2.path1	TRINITY_DN21334_c0_g1_i1.path2	Pepsico1_Contig7716.path1	TRINITY_DN4942_c0_g1_i2.path1	TRINITY_DN19075_c0_g1_i3.path1
TRINITY_DN20454_c1_g1_i1.path1	Pepsico2_Contig5308.path1	TRINITY_DN109518_c0_g1_i1.path3	TRINITY_DN18091_c0_g1_i1.path1	novel.7823
novel.7658	TRINITY_DN5816_c0_g1_i8.path1	TRINITY_DN30892_c0_g1_i1.path1	novel.7650	TRINITY_DN22428_c1_g1_i2.path1
novel.1905	TRINITY_DN12888_c1_g1_i3.path1	novel.6823	novel.6473	TRINITY_DN5585_c0_g2_i1.path1
Pepsico2_Contig2618.path1	novel.6330	novel.455	TRINITY_DN15509_c1_g1_i2.path1	TRINITY_DN571_c0_g2_i1.path1
Pepsico2_Contig7517.path1	TRINITY_DN14377_c0_g2_i1.path1	novel.9486	TRINITY_DN7072_c0_g2_i1.path1	TRINITY_DN21473_c0_g1_i1.path1
Pepsico1_Contig27172.path2	Pepsico2_Contig15299.path2	novel.1905	TRINITY_DN13229_c0_g1_i1.path1	TRINITY_DN34147_c0_g1_i7.path1
TRINITY_DN8622_c0_g3_i1.path1	novel.10349	TRINITY_DN9373_c0_g1_i6.path1	TRINITY_DN7797_c0_g1_i2.path1	novel.7300
novel.9354	TRINITY_DN112208_c0_g1_i1.path1	TRINITY_DN75642_c0_g1_i1.path1	novel.9783	novel.7176
novel.2408	novel.9695	novel.1224	novel.5932	novel.5390
TRINITY_DN22391_c0_g1_i2.path1	Pepsico1_Contig3556.path1	novel.90	novel.5865	TRINITY_DN17100_c0_g1_i12.path1
novel.2682	novel.10234	TRINITY_DN5730_c0_g2_i2.path1	novel.10209	novel.242
novel.7345	novel.6228	Pepsico1_Contig5655.path1	TRINITY_DN13349_c0_g1_i9.path1	TRINITY_DN50826_c0_g1_i13.path1
TRINITY_DN14583_c0_g1_i3.path1	TRINITY_DN12620_c0_g1_i2.path3	novel.6527	TRINITY_DN59954_c0_g1_i3.path1	novel.1760
Pepsico2_Contig12140.path1	novel.5673	TRINITY_DN78952_c0_g1_i1.path1	novel.7514	TRINITY_DN115535_c0_g1_i1.path5
novel.9808	Pepsico2_Contig2154.path1	TRINITY_DN56459_c0_g1_i1.path1	TRINITY_DN3425_c0_g2_i1.path1	TRINITY_DN34912_c0_g1_i2.path1
novel.4543	Pepsico2_Contig10688.path1	TRINITY_DN6181_c1_g1_i1.path1	novel.5276	novel.4720
novel.9996	TRINITY_DN4769_c0_g1_i5.path2	TRINITY_DN13035_c0_g1_i13.path1	TRINITY_DN582_c2_g1_i6.path1	novel.1918
novel.1466	TRINITY_DN11705_c0_g1_i1.path1	novel.6122	TRINITY_DN30461_c0_g1_i14.path1	novel.4668
TRINITY_DN11270_c1_g1_i1.path1	novel.7158	TRINITY_DN29776_c0_g2_i1.path1	novel.4648	novel.6333
TRINITY_DN20837_c0_g1_i1.path2	TRINITY_DN7146_c0_g1_i2.path3	TRINITY_DN27422_c0_g1_i2.path1	TRINITY_DN26763_c0_g1_i1.path1	TRINITY_DN74831_c0_g1_i1.path1
TRINITY_DN6932_c0_g1_i3.path1	TRINITY_DN10990_c0_g2_i1.path2	Pepsico2_Contig426.path1	novel.29	TRINITY_DN31113_c0_g3_i2.path1
TRINITY_DN21449_c0_g6_i1.path1	TRINITY_DN7691_c0_g4_i1.path1	TRINITY_DN373_c0_g2_i8.path1	novel.2139	TRINITY_DN15509_c2_g1_i1.path2
TRINITY_DN4827_c1_g1_i1.path2	Pepsico2_Contig14269.path1	TRINITY_DN28605_c0_g3_i3.path1	TRINITY_DN14013_c0_g1_i2.path2	TRINITY_DN60693_c0_g1_i7.path2
TRINITY_DN15123_c0_g1_i4.path1	Pepsico2_Contig8195.path2	TRINITY_DN17100_c0_g1_i12.path1	Pepsico1_Contig13502.path1	TRINITY_DN4027_c0_g5_i1.path3
TRINITY_DN11709_c0_g1_i4.path2	TRINITY_DN106297_c0_g1_i1.path1	novel.4586	Pepsico1_Contig171.path1	novel.8314
TRINITY_DN33054_c1_g1_i1.path1	novel.9609	TRINITY_DN13190_c0_g1_i1.path1	TRINITY_DN54683_c0_g1_i3.path2	novel.1692
novel.8652	novel.4731	TRINITY_DN11057_c0_g2_i1.path2	novel.4651	TRINITY_DN14220_c0_g2_i6.path1
novel.6517	Pepsico1_Contig982.path1	TRINITY_DN43075_c0_g1_i2.path3	TRINITY_DN36474_c0_g1_i4.path1	TRINITY_DN21116_c0_g1_i2.path1
novel.6527	novel.7425	Pepsico2_Contig17284.path1	TRINITY_DN2854_c0_g1_i1.path1	TRINITY_DN18638_c0_g1_i1.path1
Pepsico2_Contig19897.path2	novel.4793	TRINITY_DN13853_c0_g1_i1.path2	TRINITY_DN49626_c0_g1_i1.path1	novel.5853
TRINITY_DN34756_c0_g1_i5.path1	novel.5524	novel.8827	TRINITY_DN12132_c0_g2_i1.path2	TRINITY_DN582_c2_g1_i6.path2
Pepsico1_Contig4128.path1	TRINITY_DN16286_c0_g1_i4.path1	Pepsico2_Contig2899.path1	TRINITY_DN35061_c1_g1_i2.path1	TRINITY_DN31467_c1_g2_i2.path2
TRINITY_DN32457_c0_g1_i1.path2	novel.6098	novel.6685	TRINITY_DN5987_c0_g1_i3.path1	Pepsico1_Contig28670.path1
Pepsico2_Contig14060.path1	TRINITY_DN31406_c0_g3_i1.path1	Pepsico1_Contig26224.path2	novel.4470	Pepsico2_Contig19388.path2
novel.5224	TRINITY_DN23431_c0_g1_i2.path1	TRINITY_DN6573_c0_g1_i4.path1	TRINITY_DN8494_c1_g2_i1.path1	TRINITY_DN77289_c0_g1_i1.path2
novel.1719	TRINITY_DN47515_c0_g1_i2.path1	novel.5042	Pepsico1_Contig725.path2	Pepsico2_Contig2899.path1
TRINITY_DN111423_c0_g1_i1.path1	TRINITY_DN8599_c1_g1_i3.path3	TRINITY_DN6565_c0_g1_i3.path1	TRINITY_DN37162_c0_g1_i2.path2	novel.7457
TRINITY_DN45534_c0_g1_i1.path1	TRINITY_DN26672_c1_g2_i2.path1	TRINITY_DN52949_c0_g1_i1.path1	TRINITY_DN6605_c1_g2_i1.path1	TRINITY_DN13646_c0_g1_i1.path1
TRINITY_DN10891_c1_g1_i1.path1	novel.4371	TRINITY_DN75269_c0_g1_i1.path1	Pepsico1_Contig32234.path1	TRINITY_DN38929_c0_g1_i2.path1
novel.10246	TRINITY_DN31456_c0_g2_i4.path2	Pepsico2_Contig20774.path2	TRINITY_DN73289_c0_g1_i1.path1	novel.9806
TRINITY_DN4340_c0_g3_i1.path1	TRINITY_DN18123_c0_g1_i6.path1	novel.7466	Pepsico1_Contig4160.path1	TRINITY_DN21044_c2_g1_i1.path3
novel.1946	TRINITY_DN5174_c1_g1_i2.path1	novel.7286	TRINITY_DN15823_c0_g3_i1.path1	Pepsico1_Contig37386.path1
TRINITY_DN13853_c0_g1_i1.path2	TRINITY_DN65604_c0_g1_i1.path1	novel.4244	TRINITY_DN5144_c0_g1_i8.path2	novel.7149
novel.1453	novel.1891	novel.3995	TRINITY_DN4954_c0_g2_i1.path1	novel.3639
Pepsico1_Contig4308.path1	TRINITY_DN59680_c0_g1_i1.path1	TRINITY_DN31406_c0_g3_i1.path1	novel.3434	Pepsico2_Contig6647.path1
novel.1517	novel.3651	TRINITY_DN21547_c0_g2_i1.path2	novel.6105	Pepsico2_Contig17764.path1
TRINITY_DN24481_c0_g1_i3.path1	novel.10536	Pepsico2_Contig18919.path1	TRINITY_DN17603_c0_g2_i2.path1	TRINITY_DN34205_c0_g1_i1.path3
Pepsico2_Contig12767.path1	TRINITY_DN11880_c0_g1_i1.path3	novel.5064	Pepsico2_Contig14892.path2	novel.5220
TRINITY_DN8484_c0_g4_i1.path1	Pepsico2_Contig7656.path1	TRINITY_DN12218_c0_g1_i4.path1	Pepsico1_Contig16695.path1	TRINITY_DN7631_c0_g1_i2.path1
TRINITY_DN7472_c0_g2_i1.path1	TRINITY_DN29573_c0_g1_i8.path1	novel.6259	TRINITY_DN9737_c2_g1_i1.path1	TRINITY_DN23431_c0_g1_i2.path1
TRINITY_DN49704_c0_g1_i1.path1	novel.240	Pepsico2_Contig550.path1	Pepsico2_Contig19672.path2	TRINITY_DN81975_c0_g1_i1.path1
novel.408	novel.2513	TRINITY_DN59441_c0_g1_i2.path2	novel.3221	novel.9843
TRINITY_DN62941_c0_g1_i1.path1	novel.282	novel.9836	TRINITY_DN15066_c0_g1_i2.path4	TRINITY_DN15788_c0_g1_i1.path1
novel.3646	TRINITY_DN43677_c0_g2_i2.path1	TRINITY_DN23242_c0_g2_i5.path1	novel.1140	Pepsico1_Contig725.path2
novel.9751	TRINITY_DN13385_c1_g1_i3.path1	Pepsico2_Contig13651.path1	novel.5253	novel.10308
Pepsico2_Contig8385.path1	TRINITY_DN5346_c1_g1_i4.path1	TRINITY_DN7614_c1_g2_i1.path1	novel.2156	Pepsico1_Contig8217.path2
Pepsico1_Contig342.path1	TRINITY_DN37891_c0_g3_i1.path1	novel.10504	novel.10157	novel.87
novel.2960	novel.2142	Pepsico2_Contig12464.path1	TRINITY_DN17100_c0_g1_i12.path1	TRINITY_DN51081_c0_g1_i1.path1
novel.10160	novel.8875	Pepsico2_Contig6725.path2	TRINITY_DN10891_c0_g1_i1.path3	novel.474
TRINITY_DN10323_c0_g1_i5.path1	TRINITY_DN57429_c0_g1_i1.path1	Pepsico1_Contig1287.path1	TRINITY_DN3174_c1_g1_i2.path1	TRINITY_DN97391_c0_g1_i1.path1
novel.9627	Pepsico2_Contig20342.path1	TRINITY_DN5246_c0_g1_i1.path2	novel.133	TRINITY_DN8826_c1_g6_i1.path4
novel.3941	TRINITY_DN31623_c0_g1_i1.path1	TRINITY_DN4942_c0_g1_i2.path1	novel.10170	TRINITY_DN13853_c0_g1_i1.path2
novel.9695	TRINITY_DN26026_c0_g1_i4.path1	novel.10190	TRINITY_DN18286_c0_g1_i1.path2	TRINITY_DN20215_c0_g1_i3.path1
TRINITY_DN21343_c0_g1_i4.path1	novel.5826	novel.4765	novel.7301	TRINITY_DN105715_c0_g1_i1.path1
novel.6164	TRINITY_DN21449_c0_g6_i1.path1	novel.10329	Pepsico1_Contig6150.path1	TRINITY_DN19237_c0_g1_i2.path1
TRINITY_DN9007_c0_g1_i2.path1	TRINITY_DN65115_c0_g1_i1.path1	novel.4470	novel.10088	TRINITY_DN17604_c0_g2_i4.path1
TRINITY_DN25430_c0_g1_i2.path2	novel.9846	novel.1343	novel.6781	novel.875
TRINITY_DN21334_c0_g1_i1.path2	Pepsico2_Contig12952.path2	Pepsico2_Contig6108.path1	Pepsico2_Contig16780.path1	Pepsico2_Contig14708.path1
TRINITY_DN25005_c0_g1_i1.path1	TRINITY_DN4942_c0_g1_i2.path1	TRINITY_DN49776_c0_g1_i1.path3	TRINITY_DN6605_c1_g4_i2.path1	novel.10536
novel.9719	TRINITY_DN27458_c0_g1_i3.path1	novel.2290	TRINITY_DN63686_c0_g1_i1.path2	TRINITY_DN6829_c1_g1_i1.path1
TRINITY_DN42581_c0_g1_i1.path1	TRINITY_DN9653_c0_g2_i1.path1	Pepsico2_Contig8195.path2	Pepsico2_Contig8228.path1	Pepsico2_Contig2312.path1
Pepsico1_Contig21216.path2	TRINITY_DN11265_c0_g1_i9.path1	novel.4576	Pepsico1_Contig26654.path1	TRINITY_DN22833_c0_g3_i3.path1
Pepsico2_Contig8540.path2	novel.4814	novel.1672	novel.5250	TRINITY_DN5198_c0_g2_i1.path1
Pepsico2_Contig19268.path2	TRINITY_DN75417_c0_g1_i1.path2	TRINITY_DN16922_c0_g1_i1.path1	Pepsico1_Contig11308.path2	novel.2956
TRINITY_DN20723_c1_g1_i1.path1	novel.625	Pepsico1_Contig4308.path1	novel.7229	TRINITY_DN27841_c0_g1_i1.path1
TRINITY_DN9776_c0_g1_i9.path2	TRINITY_DN429_c0_g1_i1.path1	TRINITY_DN7797_c0_g1_i2.path1	Pepsico1_Contig7140.path1	TRINITY_DN13899_c0_g1_i7.path1
TRINITY_DN8756_c9_g1_i1.path1	Pepsico1_Contig14950.path1	novel.7210	novel.10555	TRINITY_DN26990_c0_g1_i3.path1
TRINITY_DN8779_c0_g2_i3.path1	novel.9833	TRINITY_DN21449_c0_g6_i1.path1	Pepsico2_Contig4727.path1	TRINITY_DN16918_c0_g1_i7.path2
Pepsico1_Contig35386.path2	TRINITY_DN7797_c0_g1_i2.path1	novel.5798	novel.8322	TRINITY_DN17221_c0_g1_i5.path2
TRINITY_DN15966_c0_g1_i1.path1	novel.6659	novel.5550	Pepsico2_Contig7319.path1	novel.7082
TRINITY_DN4783_c0_g2_i1.path1	Pepsico2_Contig11832.path1	TRINITY_DN9021_c0_g2_i5.path1	TRINITY_DN32347_c0_g2_i2.path1	TRINITY_DN10559_c0_g1_i12.path1
TRINITY_DN101519_c0_g1_i1.path1	Pepsico2_Contig5745.path1	novel.10177	TRINITY_DN29573_c0_g1_i8.path1	novel.5524
TRINITY_DN16393_c0_g1_i1.path1	novel.5253	TRINITY_DN8916_c0_g2_i1.path1	novel.4200	novel.3854
Pepsico2_Contig3632.path2	TRINITY_DN27422_c0_g1_i2.path1	Pepsico2_Contig14420.path1	Pepsico2_Contig10938.path2	novel.1106
novel.9466	novel.6334	novel.4444	Pepsico2_Contig2408.path4	TRINITY_DN6494_c0_g1_i1.path1
novel.6239	TRINITY_DN1258_c0_g4_i2.path1	novel.2552	TRINITY_DN9504_c0_g1_i1.path1	novel.6183
TRINITY_DN25777_c0_g1_i1.path2	TRINITY_DN61850_c0_g1_i1.path2	TRINITY_DN29573_c0_g1_i8.path1	novel.6927	Pepsico2_Contig10938.path2
TRINITY_DN15040_c0_g1_i1.path1	TRINITY_DN33054_c1_g1_i1.path1	TRINITY_DN10891_c1_g1_i1.path1	novel.4643	TRINITY_DN111692_c0_g1_i1.path3
novel.1410	TRINITY_DN20542_c1_g1_i1.path1	Pepsico2_Contig4029.path1	Pepsico1_Contig1577.path1	Pepsico2_Contig200.path1
TRINITY_DN20293_c0_g1_i1.path1	TRINITY_DN115535_c0_g1_i1.path5	Pepsico2_Contig12616.path1	TRINITY_DN85435_c0_g1_i1.path1	TRINITY_DN8198_c1_g1_i1.path1
novel.6925	novel.6472	novel.2557	TRINITY_DN12758_c1_g1_i2.path1	TRINITY_DN10233_c0_g1_i13.path2
Pepsico2_Contig6858.path1	TRINITY_DN111423_c0_g1_i1.path1	TRINITY_DN31623_c0_g1_i1.path1	TRINITY_DN35429_c0_g1_i1.path2	TRINITY_DN56621_c0_g2_i1.path1
TRINITY_DN2548_c0_g1_i5.path1	novel.5958	novel.787	novel.6114	novel.1177
novel.6391	novel.356	TRINITY_DN23876_c1_g1_i1.path1	novel.455	novel.5924
novel.8942	TRINITY_DN18409_c0_g3_i1.path1	novel.6182	novel.2682	novel.426
TRINITY_DN1241_c1_g1_i1.path1	novel.7113	Pepsico1_Contig1127.path1	novel.7772	TRINITY_DN12218_c0_g1_i4.path1
novel.4380	TRINITY_DN24001_c0_g1_i1.path1	novel.9579	novel.10536	novel.1783
TRINITY_DN55735_c1_g1_i1.path1	TRINITY_DN10812_c0_g1_i2.path1	TRINITY_DN19250_c0_g1_i1.path1	Pepsico2_Contig19872.path1	TRINITY_DN10477_c1_g1_i6.path2
TRINITY_DN11134_c0_g1_i14.path1	novel.5550	novel.2582	novel.2735	novel.9822
novel.90	TRINITY_DN9829_c0_g1_i3.path1	Pepsico2_Contig10651.path1	TRINITY_DN39067_c0_g1_i1.path1	novel.7670
TRINITY_DN42762_c0_g1_i1.path3	novel.4737	Pepsico2_Contig12405.path1	novel.10234	novel.4819
TRINITY_DN81975_c0_g1_i1.path1	TRINITY_DN15262_c0_g1_i1.path1	TRINITY_DN2551_c0_g2_i2.path2	TRINITY_DN21184_c0_g2_i1.path1	TRINITY_DN4944_c0_g2_i1.path1
TRINITY_DN13349_c0_g1_i9.path1	Pepsico2_Contig16813.path2	Pepsico2_Contig19574.path1	novel.1377	TRINITY_DN21802_c0_g2_i1.path1
novel.8889	novel.4528	novel.7636	novel.1419	TRINITY_DN86693_c0_g1_i1.path1
TRINITY_DN22779_c0_g1_i1.path1	Pepsico2_Contig14292.path1	novel.7437	novel.9627	novel.8178
novel.10131	TRINITY_DN17492_c0_g1_i1.path1	novel.2139	TRINITY_DN8471_c0_g1_i4.path1	TRINITY_DN52025_c0_g2_i1.path1
novel.3414	Pepsico1_Contig32360.path1	Pepsico2_Contig12140.path1	TRINITY_DN9230_c0_g1_i2.path2	novel.6649
TRINITY_DN33054_c4_g1_i1.path4	novel.6199	Pepsico2_Contig14270.path1	TRINITY_DN25777_c0_g1_i1.path4	TRINITY_DN21706_c0_g1_i3.path1
novel.4161	TRINITY_DN98696_c0_g1_i1.path1	novel.793	Pepsico2_Contig9316.path1	TRINITY_DN43549_c0_g1_i1.path2
Pepsico2_Contig7020.path1	TRINITY_DN10334_c0_g1_i5.path1	TRINITY_DN9250_c1_g1_i1.path2	novel.2582	Pepsico2_Contig6611.path3
Pepsico1_Contig3556.path1	TRINITY_DN6565_c0_g1_i3.path1	TRINITY_DN8753_c0_g1_i3.path1	TRINITY_DN9396_c0_g1_i1.path2	TRINITY_DN15668_c0_g2_i1.path1
Pepsico2_Contig14991.path2	novel.10531	novel.5163	TRINITY_DN582_c2_g1_i6.path2	TRINITY_DN32267_c0_g1_i1.path1
novel.7292	TRINITY_DN21483_c0_g2_i3.path1	novel.2553	TRINITY_DN26454_c0_g1_i1.path3	TRINITY_DN5970_c0_g2_i1.path2
novel.1935	TRINITY_DN19684_c1_g1_i1.path1	Pepsico2_Contig12871.path2	Pepsico2_Contig8070.path3	TRINITY_DN225_c2_g1_i11.path1
TRINITY_DN15850_c0_g1_i2.path1	TRINITY_DN3209_c0_g3_i1.path2	novel.1783	novel.9843	TRINITY_DN83442_c0_g1_i1.path1
Pepsico1_Contig3834.path1	novel.6338	TRINITY_DN23525_c0_g2_i1.path1	TRINITY_DN37365_c0_g2_i3.path5	novel.6234
TRINITY_DN20136_c1_g1_i1.path1	TRINITY_DN32868_c0_g1_i1.path2	novel.8663	TRINITY_DN7614_c1_g2_i1.path1	TRINITY_DN22076_c0_g2_i1.path1
novel.4527	TRINITY_DN13349_c0_g1_i9.path1	TRINITY_DN10654_c0_g3_i2.path1	TRINITY_DN95630_c0_g1_i1.path1	novel.6651
novel.7149	Pepsico1_Contig2094.path1	novel.9510	novel.8341	TRINITY_DN71109_c0_g1_i1.path2
TRINITY_DN67948_c0_g1_i1.path1	TRINITY_DN15282_c0_g1_i1.path1	TRINITY_DN51625_c0_g1_i1.path1	Pepsico2_Contig17216.path1	TRINITY_DN12108_c0_g2_i1.path1
TRINITY_DN24731_c0_g1_i1.path1	TRINITY_DN4360_c2_g1_i3.path2	novel.1944	Pepsico2_Contig12443.path1	novel.4790
TRINITY_DN1502_c0_g1_i2.path1	novel.3199	novel.1510	Pepsico2_Contig9370.path1	novel.5550
novel.5781	TRINITY_DN24906_c0_g1_i3.path1	TRINITY_DN15509_c2_g1_i1.path2	Pepsico2_Contig17807.path1	TRINITY_DN23256_c0_g1_i1.path1
Pepsico1_Contig1236.path1	novel.7547	TRINITY_DN14377_c0_g2_i1.path1	novel.6341	TRINITY_DN18237_c1_g5_i1.path1
TRINITY_DN38303_c0_g1_i2.path1	TRINITY_DN9377_c0_g5_i1.path1	TRINITY_DN91196_c0_g1_i1.path1	novel.90	TRINITY_DN101747_c0_g1_i1.path2
Pepsico2_Contig19245.path1	novel.4543	TRINITY_DN1167_c0_g2_i1.path1	novel.8743	novel.2831
TRINITY_DN31456_c0_g2_i4.path2	Pepsico2_Contig12859.path1	TRINITY_DN82762_c0_g1_i1.path1	novel.5828	TRINITY_DN16098_c0_g1_i3.path1
TRINITY_DN5976_c0_g1_i12.path2	TRINITY_DN12218_c0_g1_i4.path2	Pepsico1_Contig672.path2	novel.7351	TRINITY_DN12254_c0_g1_i1.path1
TRINITY_DN26562_c0_g1_i1.path1	novel.229	novel.9814	novel.9015	TRINITY_DN6932_c0_g1_i3.path1
TRINITY_DN1258_c0_g4_i2.path1	TRINITY_DN13881_c0_g2_i8.path1	Pepsico2_Contig12701.path2	novel.8997	TRINITY_DN11737_c0_g2_i1.path1
Pepsico1_Contig17968.path1	Pepsico2_Contig18303.path1	novel.7739	novel.3210	novel.8997
novel.33	novel.7210	Pepsico2_Contig7319.path1	TRINITY_DN8230_c1_g1_i1.path1	TRINITY_DN57903_c0_g2_i1.path5
novel.9528	novel.6234	novel.1708	TRINITY_DN12067_c0_g1_i2.path2	novel.7997
novel.6051	TRINITY_DN18904_c0_g1_i1.path2	TRINITY_DN88081_c0_g1_i1.path1	TRINITY_DN13385_c1_g1_i3.path1	novel.4048
TRINITY_DN79387_c0_g1_i1.path1	novel.1510	TRINITY_DN21802_c0_g2_i1.path1	novel.7695	TRINITY_DN7698_c0_g1_i1.path1
Pepsico1_Contig1037.path1	TRINITY_DN8605_c0_g1_i8.path1	novel.4259	novel.1795	TRINITY_DN11525_c0_g1_i21.path1
novel.2764	TRINITY_DN16113_c0_g1_i1.path1	TRINITY_DN52679_c0_g1_i1.path2	TRINITY_DN17990_c0_g1_i15.path1	TRINITY_DN40949_c1_g1_i1.path2
novel.7142	Pepsico2_Contig8546.path1	Pepsico2_Contig17563.path2	Pepsico2_Contig10706.path1	TRINITY_DN39896_c0_g1_i1.path2
novel.7904	Pepsico2_Contig5976.path1	novel.5027	TRINITY_DN1195_c0_g5_i1.path1	novel.5372
TRINITY_DN1502_c0_g4_i1.path2	TRINITY_DN52779_c0_g1_i1.path1	TRINITY_DN9426_c0_g1_i3.path1	novel.1353	TRINITY_DN2294_c1_g3_i1.path2
novel.4783	TRINITY_DN91942_c0_g1_i1.path1	novel.6174	novel.2968	novel.1610
TRINITY_DN45141_c0_g1_i1.path1	novel.9610	TRINITY_DN26562_c0_g1_i1.path1	TRINITY_DN33717_c1_g2_i3.path1	novel.5163
novel.6586	novel.197	TRINITY_DN7147_c0_g1_i3.path1	TRINITY_DN69869_c0_g1_i1.path1	Pepsico1_Contig3556.path1
novel.5550	novel.5616	TRINITY_DN98034_c0_g1_i1.path2	novel.7842	TRINITY_DN13881_c0_g2_i8.path1
novel.230	Pepsico2_Contig19897.path2	novel.4050	novel.7731	Pepsico1_Contig4160.path1
novel.2856	TRINITY_DN46635_c0_g1_i3.path3	TRINITY_DN10621_c0_g1_i7.path1	TRINITY_DN15693_c0_g1_i6.path1	novel.8313
novel.7743	TRINITY_DN14583_c0_g1_i3.path1	novel.8001	TRINITY_DN21826_c0_g1_i1.path1	TRINITY_DN493_c0_g3_i1.path5
novel.9844	TRINITY_DN4954_c0_g2_i1.path2	novel.4737	TRINITY_DN12086_c0_g2_i2.path1	novel.215
TRINITY_DN19150_c0_g1_i2.path2	TRINITY_DN56459_c0_g1_i1.path1	novel.5972	novel.3646	novel.4139
novel.8920	TRINITY_DN54033_c0_g2_i2.path2	TRINITY_DN19898_c0_g5_i2.path1	novel.342	novel.7102
Pepsico2_Contig9798.path1	TRINITY_DN16355_c0_g1_i5.path1	TRINITY_DN6829_c1_g1_i1.path1	novel.6259	novel.5264
TRINITY_DN8896_c0_g1_i3.path2	TRINITY_DN8639_c0_g2_i1.path3	novel.3908	Pepsico1_Contig3671.path2	TRINITY_DN11478_c0_g1_i4.path1
TRINITY_DN23876_c1_g1_i1.path1	Pepsico2_Contig9474.path1	TRINITY_DN3541_c0_g1_i4.path2	Pepsico2_Contig4524.path1	TRINITY_DN397_c0_g2_i1.path1
Pepsico2_Contig15299.path2	novel.2796	novel.5958	TRINITY_DN11076_c0_g1_i1.path1	novel.2532
Pepsico2_Contig15519.path2	novel.2960	novel.1891	TRINITY_DN17358_c1_g2_i4.path1	TRINITY_DN42792_c0_g4_i1.path1
TRINITY_DN14129_c0_g1_i5.path3	novel.2632	TRINITY_DN11435_c0_g1_i6.path1	novel.2990	novel.7292
novel.1927	TRINITY_DN1258_c0_g9_i1.path1	Pepsico2_Contig16985.path1	novel.6715	Pepsico2_Contig12326.path2
novel.348	Pepsico2_Contig6528.path1	Pepsico2_Contig20050.path1	TRINITY_DN9312_c0_g1_i4.path2	TRINITY_DN7475_c0_g2_i1.path1
TRINITY_DN65604_c0_g1_i1.path1	Pepsico2_Contig14039.path1	TRINITY_DN16937_c0_g1_i1.path2	TRINITY_DN9007_c0_g1_i2.path1	novel.10325
TRINITY_DN9268_c1_g2_i1.path1	TRINITY_DN101519_c0_g1_i1.path1	TRINITY_DN19834_c0_g1_i3.path2	novel.5882	TRINITY_DN61850_c0_g1_i1.path2
novel.2980	Pepsico2_Contig14022.path1	Pepsico2_Contig14015.path1	Pepsico2_Contig16986.path1	Pepsico1_Contig4680.path1
TRINITY_DN23743_c0_g1_i1.path1	TRINITY_DN29163_c0_g5_i1.path1	TRINITY_DN37599_c0_g1_i2.path1	TRINITY_DN7651_c0_g1_i4.path1	novel.5257
novel.4014	TRINITY_DN12916_c0_g4_i1.path1	TRINITY_DN5351_c0_g2_i1.path1	Pepsico2_Contig15659.path2	TRINITY_DN21449_c0_g6_i1.path1
novel.1365	TRINITY_DN1502_c0_g4_i1.path2	TRINITY_DN29163_c0_g5_i1.path1	Pepsico2_Contig14411.path2	novel.8977
novel.10352	novel.2079	TRINITY_DN17278_c1_g1_i1.path1	TRINITY_DN12218_c0_g1_i4.path2	novel.308
TRINITY_DN38216_c0_g1_i1.path1	Pepsico2_Contig4727.path1	Pepsico2_Contig12433.path2	TRINITY_DN31147_c0_g1_i1.path1	novel.4284
Pepsico1_Contig37863.path1	novel.3585	TRINITY_DN24932_c0_g1_i1.path1	TRINITY_DN98903_c0_g1_i1.path1	TRINITY_DN19482_c0_g1_i2.path1
Pepsico1_Contig36346.path1	novel.8976	Pepsico2_Contig20717.path1	Pepsico2_Contig18670.path1	TRINITY_DN58726_c0_g1_i1.path1
TRINITY_DN25624_c0_g1_i4.path1	TRINITY_DN17358_c1_g2_i4.path1	TRINITY_DN15164_c0_g1_i4.path1	novel.10237	novel.8827
novel.2360	Pepsico1_Contig3093.path1	TRINITY_DN1543_c0_g1_i1.path1	TRINITY_DN25788_c0_g1_i1.path2	Pepsico1_Contig35398.path1
TRINITY_DN57575_c0_g1_i2.path2	TRINITY_DN14211_c0_g1_i3.path1	novel.3265	TRINITY_DN9309_c0_g1_i2.path1	novel.10201
novel.10624	novel.8967	TRINITY_DN59441_c0_g1_i2.path4	TRINITY_DN18240_c0_g3_i1.path1	TRINITY_DN83410_c0_g1_i1.path1
TRINITY_DN53274_c0_g1_i1.path1	novel.4527	novel.5882	TRINITY_DN6573_c0_g1_i4.path1	novel.3027
Pepsico2_Contig15875.path2	TRINITY_DN27142_c0_g2_i1.path1	TRINITY_DN21483_c0_g2_i3.path1	TRINITY_DN14386_c0_g1_i3.path1	TRINITY_DN4640_c0_g2_i1.path2
TRINITY_DN17818_c0_g1_i3.path2	TRINITY_DN12806_c0_g1_i1.path1	TRINITY_DN36478_c0_g1_i3.path1	TRINITY_DN26719_c0_g1_i1.path1	TRINITY_DN25628_c0_g1_i1.path1
TRINITY_DN32929_c0_g1_i1.path1	Pepsico1_Contig3638.path2	TRINITY_DN30743_c0_g1_i1.path1	novel.2911	novel.4470
TRINITY_DN24505_c0_g1_i1.path1	novel.4259	TRINITY_DN2_c0_g3_i1.path1	TRINITY_DN610_c0_g3_i2.path1	novel.2777
TRINITY_DN107989_c0_g1_i1.path1	novel.8750	TRINITY_DN17993_c0_g1_i5.path1	novel.4371	novel.1461
novel.6783	Pepsico1_Contig2161.path2	novel.4051	TRINITY_DN111530_c0_g1_i1.path2	novel.5636
TRINITY_DN1968_c0_g1_i4.path1	novel.2557	novel.2881	Pepsico1_Contig1082.path1	TRINITY_DN7190_c0_g3_i1.path1
novel.3671	Pepsico1_Contig346.path1	TRINITY_DN27142_c0_g2_i1.path1	TRINITY_DN60693_c0_g1_i7.path2	TRINITY_DN112088_c0_g1_i1.path1
TRINITY_DN12108_c0_g2_i1.path1	novel.2808	novel.3688	TRINITY_DN8826_c1_g6_i1.path4	TRINITY_DN45971_c0_g1_i3.path1
TRINITY_DN10366_c1_g3_i1.path1	novel.8994	TRINITY_DN11475_c0_g5_i1.path1	novel.2845	TRINITY_DN24254_c0_g1_i2.path1
TRINITY_DN23219_c0_g5_i1.path1	Pepsico1_Contig51.path1	TRINITY_DN92594_c0_g1_i1.path1	TRINITY_DN32750_c1_g1_i7.path1	TRINITY_DN5232_c0_g1_i7.path1
Pepsico1_Contig5775.path1	novel.8889	Pepsico2_Contig11832.path1	Pepsico2_Contig4420.path1	novel.8937
TRINITY_DN5752_c0_g1_i1.path1	Pepsico2_Contig4421.path1	TRINITY_DN10323_c0_g1_i5.path1	Pepsico1_Contig795.path1	TRINITY_DN1380_c0_g1_i2.path2
Pepsico2_Contig2607.path1	novel.6051	TRINITY_DN89_c0_g1_i9.path1	novel.347	novel.1688
novel.197	novel.8582	novel.1806	TRINITY_DN14890_c0_g3_i1.path1	novel.5667
TRINITY_DN8198_c1_g1_i1.path1	Pepsico2_Contig2548.path1	TRINITY_DN26545_c0_g1_i1.path2	novel.3013	TRINITY_DN2585_c2_g1_i1.path2
novel.7592	novel.1803	TRINITY_DN13542_c0_g1_i1.path1	novel.4654	TRINITY_DN10620_c0_g1_i4.path1
TRINITY_DN6877_c0_g1_i1.path1	TRINITY_DN25384_c0_g2_i1.path3	Pepsico2_Contig10332.path1	TRINITY_DN37339_c0_g1_i2.path1	novel.9528
TRINITY_DN24150_c0_g2_i3.path2	novel.8909	novel.4345	TRINITY_DN10633_c0_g1_i1.path1	TRINITY_DN18240_c0_g3_i1.path1
novel.3434	TRINITY_DN8484_c0_g4_i1.path1	TRINITY_DN10556_c0_g1_i1.path1	Pepsico2_Contig1343.path2	TRINITY_DN22129_c0_g4_i1.path2
novel.910	novel.2968	TRINITY_DN13385_c1_g1_i3.path1	novel.4790	novel.1776
Pepsico2_Contig10618.path1	novel.3159	Pepsico2_Contig12784.path1	novel.7199	TRINITY_DN72039_c0_g1_i1.path1
TRINITY_DN21802_c0_g2_i1.path1	novel.3908	TRINITY_DN9829_c0_g1_i3.path1	Pepsico2_Contig12548.path1	novel.5859
novel.7855	Pepsico2_Contig14959.path1	TRINITY_DN65115_c0_g1_i1.path1	TRINITY_DN33725_c0_g1_i2.path1	novel.3169
TRINITY_DN31720_c0_g1_i1.path4	Pepsico1_Contig35948.path1	novel.1441	Pepsico2_Contig2456.path1	Pepsico2_Contig12311.path1
novel.7623	novel.1116	Pepsico1_Contig294.path1	TRINITY_DN1623_c1_g1_i8.path2	TRINITY_DN27741_c0_g1_i1.path1
novel.9833	TRINITY_DN80803_c0_g1_i1.path1	novel.10055	TRINITY_DN13591_c0_g1_i5.path1	novel.1801
novel.9475	novel.4279	TRINITY_DN10575_c0_g2_i1.path1	novel.1691	Pepsico2_Contig7855.path1
TRINITY_DN99345_c0_g1_i1.path1	TRINITY_DN8734_c0_g1_i2.path2	Pepsico2_Contig20023.path1	novel.7286	novel.9384
novel.7453	novel.6333	novel.4266	novel.8690	TRINITY_DN6563_c0_g1_i19.path2
TRINITY_DN30795_c0_g1_i1.path1	TRINITY_DN24731_c0_g1_i1.path1	novel.6228	novel.4274	novel.3882
TRINITY_DN23219_c0_g3_i3.path1	novel.6134	TRINITY_DN27981_c0_g1_i1.path1	Pepsico2_Contig4743.path1	TRINITY_DN10575_c0_g2_i1.path1
novel.9827	novel.7121	Pepsico1_Contig33288.path1	TRINITY_DN26107_c0_g1_i2.path1	novel.6793
TRINITY_DN24214_c0_g2_i1.path1	TRINITY_DN4529_c1_g1_i1.path2	novel.8909	TRINITY_DN26083_c0_g1_i3.path1	novel.4731
novel.4263	TRINITY_DN4783_c0_g2_i1.path1	TRINITY_DN75397_c0_g1_i1.path1	novel.10363	TRINITY_DN1212_c0_g1_i1.path1
novel.2823	novel.979	Pepsico2_Contig337.path1	TRINITY_DN19219_c0_g1_i1.path1	TRINITY_DN4027_c2_g1_i1.path2
TRINITY_DN5669_c0_g1_i1.path1	novel.1245	TRINITY_DN14583_c0_g1_i3.path1	TRINITY_DN14481_c1_g2_i1.path1	Pepsico1_Contig2444.path1
TRINITY_DN22428_c1_g1_i2.path1	TRINITY_DN1457_c0_g2_i3.path1	TRINITY_DN82047_c0_g1_i1.path1	novel.7636	TRINITY_DN24505_c0_g1_i1.path1
novel.8492	TRINITY_DN99434_c0_g1_i1.path1	TRINITY_DN16555_c0_g1_i2.path1	TRINITY_DN37195_c0_g1_i7.path1	novel.4517
TRINITY_DN7147_c0_g1_i3.path1	TRINITY_DN69479_c0_g1_i1.path2	novel.6356	TRINITY_DN17270_c0_g1_i3.path2	TRINITY_DN32159_c0_g1_i1.path1
TRINITY_DN27300_c0_g1_i1.path1	novel.10160	Pepsico2_Contig7946.path1	novel.10251	novel.10344
novel.10157	novel.1558	TRINITY_DN14211_c0_g1_i3.path1	Pepsico2_Contig14293.path1	novel.4787
novel.9692	novel.1538	Pepsico2_Contig10040.path1	novel.5859	TRINITY_DN9209_c0_g1_i7.path1
novel.8292	novel.9384	novel.4814	novel.5027	novel.6059
TRINITY_DN70501_c0_g1_i1.path1	TRINITY_DN19075_c0_g1_i3.path1	novel.4527	novel.6234	novel.7199
TRINITY_DN65319_c0_g1_i1.path1	novel.4668	novel.1372	novel.1104	novel.6523
TRINITY_DN11057_c0_g2_i1.path2	novel.349	novel.8996	novel.5372	novel.9332
Pepsico2_Contig11466.path1	novel.473	TRINITY_DN41080_c0_g1_i1.path1	novel.3660	TRINITY_DN28719_c0_g4_i1.path1
novel.5598	TRINITY_DN10979_c0_g2_i8.path1	novel.1711	novel.3651	novel.2808
TRINITY_DN20328_c0_g1_i1.path2	Pepsico2_Contig14572.path1	novel.8823	novel.5970	novel.2713
novel.10147	Pepsico2_Contig19977.path1	TRINITY_DN6605_c1_g1_i5.path2	TRINITY_DN1258_c0_g7_i1.path1	Pepsico2_Contig9966.path1
novel.1224	TRINITY_DN536_c0_g1_i1.path1	TRINITY_DN5245_c0_g1_i2.path1	Pepsico1_Contig2110.path2	Pepsico2_Contig2921.path1
TRINITY_DN31855_c0_g1_i2.path2	TRINITY_DN42989_c1_g1_i1.path1	novel.1731	novel.6055	novel.4757
TRINITY_DN19296_c0_g1_i3.path1	Pepsico2_Contig17956.path1	Pepsico2_Contig2081.path2	TRINITY_DN43172_c0_g1_i1.path2	TRINITY_DN15963_c0_g1_i2.path2
novel.6098	novel.8995	novel.2134	novel.2436	TRINITY_DN60836_c0_g1_i1.path1
TRINITY_DN17463_c0_g1_i3.path1	novel.4774	novel.4204	TRINITY_DN26458_c0_g1_i1.path1	Pepsico2_Contig12140.path1
TRINITY_DN13385_c1_g1_i3.path1	TRINITY_DN87130_c0_g1_i1.path1	TRINITY_DN112740_c0_g1_i1.path2	Pepsico2_Contig3599.path1	TRINITY_DN33572_c0_g2_i1.path2
novel.2808	TRINITY_DN1122_c0_g4_i2.path2	novel.7149	TRINITY_DN62941_c0_g1_i1.path1	TRINITY_DN9918_c0_g2_i11.path1
TRINITY_DN11737_c0_g2_i1.path1	TRINITY_DN99345_c0_g1_i1.path1	TRINITY_DN2755_c0_g2_i1.path2	TRINITY_DN14583_c0_g1_i3.path1	TRINITY_DN12408_c0_g2_i2.path1
novel.1070	novel.6027	Pepsico2_Contig17102.path1	novel.680	TRINITY_DN2755_c0_g2_i1.path1
TRINITY_DN30123_c0_g1_i1.path1	TRINITY_DN23984_c0_g1_i1.path1	Pepsico1_Contig24970.path1	TRINITY_DN15235_c0_g1_i1.path2	novel.403
TRINITY_DN111593_c0_g1_i1.path1	TRINITY_DN1195_c0_g5_i1.path2	novel.10160	novel.10507	TRINITY_DN13249_c0_g2_i1.path1
novel.6685	TRINITY_DN55971_c0_g1_i1.path1	Pepsico2_Contig19114.path1	Pepsico1_Contig1331.path2	TRINITY_DN8494_c1_g2_i1.path1
novel.7437	novel.1344	Pepsico2_Contig11020.path2	TRINITY_DN11709_c0_g1_i4.path2	novel.7425
TRINITY_DN1921_c0_g2_i4.path1	TRINITY_DN3360_c0_g1_i5.path1	TRINITY_DN12193_c0_g2_i1.path1	novel.4645	Pepsico1_Contig38302.path1
novel.609	TRINITY_DN8095_c0_g1_i3.path1	TRINITY_DN59894_c0_g1_i1.path1	novel.9833	Pepsico2_Contig2961.path1
TRINITY_DN26453_c0_g2_i5.path2	TRINITY_DN2548_c0_g1_i5.path1	novel.6334	Pepsico2_Contig17141.path3	TRINITY_DN19565_c0_g1_i3.path1
TRINITY_DN7068_c0_g1_i5.path1	novel.8223	novel.10085	novel.4734	Pepsico2_Contig1343.path2
TRINITY_DN3429_c1_g1_i2.path1	novel.5935	Pepsico2_Contig16813.path2	novel.1151	novel.8582
novel.5935	novel.793	novel.7547	novel.313	novel.6110
Pepsico2_Contig2134.path1	novel.5002	TRINITY_DN21149_c0_g3_i1.path1	novel.4765	novel.7531
novel.6930	TRINITY_DN12386_c0_g2_i1.path1	Pepsico2_Contig1933.path1	TRINITY_DN11869_c0_g1_i1.path1	TRINITY_DN28959_c0_g1_i1.path1
novel.8223	TRINITY_DN12571_c0_g1_i13.path1	TRINITY_DN9396_c0_g1_i1.path2	novel.8810	TRINITY_DN91798_c0_g1_i1.path4
Pepsico2_Contig7178.path1	novel.7299	TRINITY_DN34430_c1_g1_i1.path1	novel.7833	TRINITY_DN98034_c0_g1_i1.path2
novel.2647	Pepsico2_Contig20393.path1	novel.1524	novel.10297	novel.1093
TRINITY_DN13881_c0_g2_i8.path2	TRINITY_DN10612_c0_g1_i14.path1	Pepsico2_Contig9474.path1	Pepsico1_Contig1404.path1	TRINITY_DN39280_c0_g1_i6.path2
novel.6928	Pepsico1_Contig7138.path1	TRINITY_DN10366_c1_g3_i1.path1	TRINITY_DN10806_c1_g1_i1.path1	TRINITY_DN23959_c1_g1_i3.path1
novel.8697	Pepsico2_Contig12464.path1	novel.6164	TRINITY_DN17358_c1_g3_i2.path1	TRINITY_DN23525_c0_g2_i1.path1
TRINITY_DN9829_c0_g1_i3.path1	novel.3595	novel.2963	TRINITY_DN9509_c0_g1_i4.path1	TRINITY_DN14890_c0_g3_i1.path1
novel.9244	novel.7300	novel.7719	TRINITY_DN14976_c1_g2_i1.path1	TRINITY_DN27638_c0_g1_i9.path1
novel.8730	novel.10554	novel.9805	Pepsico2_Contig14724.path4	TRINITY_DN7199_c0_g4_i2.path1
novel.3027	TRINITY_DN10366_c1_g3_i1.path1	novel.1355	novel.5235	novel.10139
TRINITY_DN51625_c0_g1_i1.path1	TRINITY_DN83999_c0_g1_i1.path1	novel.5034	novel.515	TRINITY_DN12171_c0_g1_i7.path2
TRINITY_DN8916_c0_g2_i1.path1	novel.5845	TRINITY_DN13217_c0_g1_i1.path3	TRINITY_DN6605_c1_g1_i5.path2	TRINITY_DN24283_c0_g1_i2.path1
novel.4459	novel.7593	TRINITY_DN9653_c0_g2_i1.path1	TRINITY_DN14012_c0_g1_i1.path2	TRINITY_DN90250_c0_g1_i1.path2
Pepsico2_Contig6342.path2	novel.83	Pepsico1_Contig1082.path1	TRINITY_DN108772_c0_g1_i1.path1	novel.1524
novel.2964	TRINITY_DN11737_c0_g2_i1.path1	Pepsico1_Contig4393.path1	TRINITY_DN6228_c0_g3_i1.path1	TRINITY_DN92594_c0_g1_i1.path1
TRINITY_DN17599_c0_g1_i1.path1	TRINITY_DN36403_c0_g4_i2.path1	novel.4694	novel.3040	TRINITY_DN9350_c0_g1_i3.path1
novel.8632	TRINITY_DN15712_c0_g1_i2.path1	TRINITY_DN12806_c0_g1_i1.path1	TRINITY_DN5346_c1_g1_i4.path1	Pepsico2_Contig12172.path1
novel.6715	novel.6823	TRINITY_DN23431_c0_g1_i2.path1	novel.2455	TRINITY_DN106693_c0_g1_i1.path1
novel.3585	novel.9475	novel.5533	TRINITY_DN29568_c0_g1_i1.path1	TRINITY_DN2551_c0_g2_i2.path2
Pepsico2_Contig2458.path1	Pepsico1_Contig2674.path1	TRINITY_DN112208_c0_g1_i1.path1	TRINITY_DN10049_c0_g1_i6.path1	novel.9674
TRINITY_DN13092_c0_g1_i4.path1	Pepsico1_Contig4046.path1	TRINITY_DN21334_c0_g1_i1.path2	novel.5613	novel.1690
TRINITY_DN101536_c0_g1_i1.path1	novel.2971	TRINITY_DN21553_c0_g1_i5.path4	Pepsico2_Contig20331.path1	novel.10146
TRINITY_DN34600_c0_g1_i1.path1	TRINITY_DN12408_c4_g1_i1.path1	Pepsico2_Contig8540.path2	Pepsico1_Contig26224.path2	TRINITY_DN25501_c0_g1_i1.path1
TRINITY_DN3857_c0_g2_i1.path2	novel.9782	TRINITY_DN6470_c2_g1_i3.path2	TRINITY_DN37359_c0_g1_i1.path2	novel.1841
TRINITY_DN18663_c0_g3_i1.path1	novel.660	TRINITY_DN9899_c0_g1_i1.path1	novel.7113	TRINITY_DN9637_c0_g1_i4.path1
Pepsico1_Contig35398.path1	TRINITY_DN23525_c0_g2_i1.path1	TRINITY_DN25384_c0_g1_i1.path2	TRINITY_DN9250_c1_g1_i1.path1	TRINITY_DN9608_c0_g1_i4.path2
TRINITY_DN87130_c0_g1_i1.path1	TRINITY_DN29732_c0_g1_i1.path1	novel.8203	TRINITY_DN3559_c0_g2_i1.path1	TRINITY_DN21288_c0_g2_i2.path1
TRINITY_DN54316_c0_g1_i1.path1	TRINITY_DN43172_c0_g1_i1.path2	TRINITY_DN2294_c1_g3_i1.path2	novel.5267	TRINITY_DN30736_c0_g1_i1.path1
Pepsico2_Contig17149.path2	TRINITY_DN2490_c0_g2_i1.path2	TRINITY_DN21346_c0_g1_i2.path1	Pepsico1_Contig2552.path1	TRINITY_DN45793_c0_g1_i1.path1
Pepsico2_Contig12952.path2	novel.9016	novel.8504	novel.10224	TRINITY_DN8596_c0_g7_i1.path1
novel.6966	novel.6818	TRINITY_DN27677_c0_g1_i2.path1	Pepsico2_Contig1864.path1	novel.5
TRINITY_DN18123_c0_g1_i6.path1	Pepsico1_Contig5655.path1	Pepsico2_Contig19695.path1	novel.3664	novel.1445
TRINITY_DN87787_c0_g1_i1.path1	TRINITY_DN11475_c0_g6_i1.path1	novel.6051	novel.6218	TRINITY_DN111601_c0_g1_i1.path2
novel.4464	TRINITY_DN16663_c1_g1_i1.path2	novel.10179	TRINITY_DN30719_c0_g1_i1.path2	TRINITY_DN4885_c0_g4_i1.path1
novel.309	novel.1768	novel.356	novel.2956	novel.9809
TRINITY_DN8094_c0_g1_i2.path1	Pepsico2_Contig17839.path1	novel.7677	novel.5592	novel.8465
novel.3577	Pepsico2_Contig11667.path1	TRINITY_DN20401_c0_g2_i1.path1	novel.6220	TRINITY_DN45842_c0_g1_i1.path2
TRINITY_DN8756_c10_g1_i1.path1	novel.5027	novel.10551	TRINITY_DN11234_c0_g2_i1.path1	Pepsico2_Contig15340.path1
TRINITY_DN27300_c0_g1_i1.path2	novel.2014	novel.8387	TRINITY_DN10416_c0_g2_i1.path1	TRINITY_DN51625_c0_g1_i1.path1
novel.3040	Pepsico1_Contig38400.path1	Pepsico2_Contig5514.path1	TRINITY_DN92652_c0_g1_i1.path1	TRINITY_DN103146_c0_g1_i1.path1
TRINITY_DN34430_c0_g3_i1.path1	TRINITY_DN82762_c0_g1_i1.path1	novel.7791	novel.1443	TRINITY_DN62350_c0_g1_i1.path1
novel.5813	TRINITY_DN30361_c0_g1_i2.path1	novel.8232	TRINITY_DN9385_c2_g1_i1.path1	novel.6665
TRINITY_DN40249_c0_g1_i1.path1	Pepsico2_Contig6148.path1	TRINITY_DN24546_c0_g1_i1.path1	Pepsico1_Contig3448.path1	novel.6027
Pepsico2_Contig9071.path1	TRINITY_DN32929_c0_g1_i1.path1	novel.9384	novel.9610	Pepsico1_Contig29617.path1
Pepsico2_Contig14792.path2	TRINITY_DN21547_c0_g2_i1.path2	TRINITY_DN11737_c0_g2_i1.path1	TRINITY_DN111692_c0_g1_i1.path3	TRINITY_DN15667_c0_g2_i1.path1
novel.8160	TRINITY_DN30743_c0_g1_i1.path1	TRINITY_DN26719_c0_g1_i1.path1	TRINITY_DN56621_c0_g2_i1.path1	TRINITY_DN10891_c1_g1_i1.path2
TRINITY_DN61850_c0_g1_i1.path2	novel.10099	novel.3824	novel.4646	TRINITY_DN52145_c0_g1_i1.path4
novel.1115	Pepsico1_Contig7129.path1	TRINITY_DN18610_c0_g2_i1.path1	TRINITY_DN79972_c0_g1_i1.path1	novel.4879
TRINITY_DN17710_c0_g1_i1.path1	novel.4509	novel.9695	TRINITY_DN24768_c0_g2_i1.path2	Pepsico1_Contig3168.path3
TRINITY_DN1092_c1_g1_i1.path2	Pepsico2_Contig20227.path3	TRINITY_DN103146_c0_g1_i1.path1	TRINITY_DN59894_c0_g1_i1.path1	novel.921
novel.9905	novel.9808	TRINITY_DN54316_c0_g1_i1.path1	novel.3291	TRINITY_DN94953_c0_g1_i1.path1
TRINITY_DN46218_c0_g1_i1.path1	novel.2	novel.7199	novel.6231	novel.793
TRINITY_DN60836_c0_g1_i1.path1	novel.2582	novel.7453	novel.1536	novel.6037
novel.2997	Pepsico1_Contig3571.path1	novel.4836	Pepsico1_Contig2081.path1	TRINITY_DN21086_c0_g1_i1.path1
Pepsico1_Contig31806.path1	novel.10043	TRINITY_DN32381_c0_g1_i1.path1	TRINITY_DN10595_c0_g2_i2.path2	novel.6072
TRINITY_DN92130_c0_g1_i1.path1	novel.3939	novel.2781	TRINITY_DN31855_c0_g1_i2.path2	Pepsico2_Contig2246.path2
TRINITY_DN17993_c0_g1_i5.path1	TRINITY_DN56541_c0_g1_i1.path1	novel.4541	novel.7742	novel.1221
TRINITY_DN6722_c0_g1_i1.path1	novel.315	TRINITY_DN60842_c0_g4_i3.path1	novel.9826	novel.6216
Pepsico2_Contig16273.path2	novel.3187	novel.7044	novel.2738	Pepsico2_Contig8070.path3
Pepsico2_Contig3356.path1	Pepsico2_Contig10933.path1	Pepsico1_Contig2546.path3	novel.6174	novel.3646
Pepsico1_Contig4160.path1	Pepsico2_Contig6486.path1	TRINITY_DN3559_c0_g2_i1.path1	Pepsico2_Contig18289.path2	TRINITY_DN9891_c0_g4_i1.path2
novel.7924	TRINITY_DN73847_c0_g1_i1.path1	novel.9027	TRINITY_DN8013_c0_g1_i1.path1	novel.10107
novel.5110	novel.5163	Pepsico2_Contig10682.path1	novel.1646	TRINITY_DN13881_c0_g2_i8.path2
novel.5820	TRINITY_DN14386_c0_g1_i3.path1	novel.426	novel.6159	novel.10160
novel.242	TRINITY_DN50072_c0_g1_i1.path1	TRINITY_DN29296_c0_g1_i3.path1	novel.4586	novel.5064
novel.6079	TRINITY_DN26957_c0_g1_i1.path1	novel.1409	Pepsico2_Contig12140.path1	Pepsico2_Contig20331.path1
TRINITY_DN98679_c0_g1_i1.path1	TRINITY_DN89062_c0_g1_i1.path1	TRINITY_DN23579_c0_g1_i1.path1	TRINITY_DN33640_c0_g3_i1.path1	TRINITY_DN31406_c0_g3_i1.path1
TRINITY_DN83655_c0_g1_i1.path1	Pepsico1_Contig4308.path1	TRINITY_DN20293_c0_g1_i1.path1	novel.7309	novel.4785
TRINITY_DN29507_c0_g1_i2.path1	Pepsico2_Contig20286.path2	Pepsico2_Contig20718.path1	novel.8652	novel.8745
Pepsico2_Contig12598.path1	TRINITY_DN1240_c0_g2_i1.path2	novel.1397	TRINITY_DN115535_c0_g1_i1.path5	novel.7500
novel.3753	TRINITY_DN493_c0_g3_i1.path2	TRINITY_DN29732_c0_g1_i1.path1	TRINITY_DN31586_c0_g1_i9.path1	Pepsico2_Contig16099.path1
novel.8797	TRINITY_DN69493_c0_g1_i1.path1	novel.8697	novel.1708	novel.1476
novel.8690	TRINITY_DN7964_c0_g1_i2.path1	Pepsico2_Contig640.path1	novel.4963	TRINITY_DN40362_c0_g1_i1.path1
TRINITY_DN23525_c0_g2_i1.path1	novel.9698	Pepsico2_Contig16986.path1	novel.4581	novel.7119
TRINITY_DN11475_c0_g6_i1.path1	novel.342	TRINITY_DN49192_c0_g1_i1.path2	novel.5826	TRINITY_DN15612_c0_g1_i10.path3
TRINITY_DN16411_c0_g1_i5.path1	novel.9814	TRINITY_DN38440_c0_g1_i2.path1	Pepsico1_Contig8217.path2	novel.6391
novel.4731	TRINITY_DN26562_c0_g2_i1.path1	TRINITY_DN11367_c0_g1_i3.path1	novel.9827	TRINITY_DN21149_c0_g3_i1.path1
TRINITY_DN9373_c0_g1_i6.path1	Pepsico2_Contig20430.path1	novel.5667	novel.6095	TRINITY_DN21483_c0_g2_i3.path1
novel.9592	TRINITY_DN115449_c0_g1_i1.path1	novel.9826	novel.10564	TRINITY_DN26499_c0_g3_i2.path2
TRINITY_DN11108_c0_g1_i6.path1	Pepsico2_Contig20183.path1	TRINITY_DN17492_c0_g1_i1.path1	TRINITY_DN13332_c0_g1_i6.path1	TRINITY_DN20697_c0_g1_i3.path1
TRINITY_DN26449_c0_g1_i1.path2	novel.7474	TRINITY_DN19135_c0_g3_i1.path1	TRINITY_DN7389_c2_g4_i2.path1	TRINITY_DN76151_c0_g1_i1.path1
novel.5271	novel.3004	novel.9371	novel.9681	novel.6165
TRINITY_DN10686_c1_g1_i1.path1	novel.4284	TRINITY_DN16511_c0_g1_i6.path1	novel.2498	Pepsico1_Contig33503.path2
TRINITY_DN3209_c0_g3_i1.path2	Pepsico1_Contig25437.path1	novel.5386	novel.1442	Pepsico1_Contig14704.path1
novel.6157	Pepsico1_Contig6988.path1	TRINITY_DN3299_c0_g1_i18.path1	TRINITY_DN17386_c0_g1_i6.path1	novel.9815
novel.4577	novel.2833	novel.5950	novel.9354	TRINITY_DN102781_c0_g1_i1.path1
TRINITY_DN25461_c0_g1_i1.path1	TRINITY_DN98936_c0_g1_i1.path1	novel.9808	Pepsico2_Contig16881.path1	novel.5032
TRINITY_DN11076_c0_g1_i1.path1	TRINITY_DN5734_c0_g1_i5.path2	Pepsico1_Contig8217.path2	novel.877	TRINITY_DN26345_c0_g1_i1.path1
TRINITY_DN30706_c0_g1_i2.path1	TRINITY_DN25826_c0_g2_i1.path1	TRINITY_DN43286_c0_g1_i1.path1	TRINITY_DN25217_c0_g1_i1.path1	Pepsico2_Contig12940.path1
TRINITY_DN31771_c0_g3_i1.path1	Pepsico2_Contig19669.path1	TRINITY_DN31074_c0_g1_i2.path2	Pepsico2_Contig13314.path2	TRINITY_DN22405_c0_g2_i1.path2
TRINITY_DN26562_c0_g2_i1.path1	TRINITY_DN86613_c0_g1_i1.path1	TRINITY_DN25304_c0_g1_i2.path2	novel.7251	TRINITY_DN10556_c0_g1_i1.path1
novel.474	TRINITY_DN15612_c0_g1_i10.path3	novel.1093	TRINITY_DN2_c0_g1_i2.path2	TRINITY_DN21683_c0_g1_i1.path1
TRINITY_DN4456_c0_g2_i10.path2	novel.6151	Pepsico2_Contig3196.path2	TRINITY_DN9300_c0_g1_i5.path3	novel.2460
TRINITY_DN32090_c0_g1_i1.path1	novel.4459	novel.7165	TRINITY_DN15251_c0_g1_i1.path2	TRINITY_DN13856_c2_g1_i1.path1
novel.1558	TRINITY_DN24768_c0_g2_i1.path1	TRINITY_DN39335_c0_g1_i1.path1	novel.2966	TRINITY_DN25461_c0_g1_i1.path2
TRINITY_DN36154_c1_g1_i1.path2	TRINITY_DN9412_c0_g3_i1.path1	TRINITY_DN26115_c0_g2_i3.path1	TRINITY_DN20837_c0_g1_i1.path2	TRINITY_DN31490_c0_g2_i1.path1
TRINITY_DN1148_c0_g1_i2.path1	TRINITY_DN31143_c0_g1_i14.path1	Pepsico1_Contig3556.path1	novel.10156	TRINITY_DN29950_c0_g1_i1.path1
TRINITY_DN14491_c0_g1_i4.path1	TRINITY_DN10059_c0_g2_i4.path1	TRINITY_DN50134_c0_g1_i1.path1	novel.3477	TRINITY_DN15838_c0_g1_i1.path1
novel.6134	TRINITY_DN34473_c0_g1_i1.path3	novel.2971	novel.1226	TRINITY_DN24113_c3_g2_i1.path1
TRINITY_DN15375_c0_g1_i2.path1	TRINITY_DN27_c3_g1_i1.path1	TRINITY_DN5346_c1_g1_i4.path1	Pepsico2_Contig8796.path2	TRINITY_DN47085_c0_g1_i1.path1
novel.133	novel.10007	novel.7790	Pepsico2_Contig12172.path1	TRINITY_DN51484_c0_g2_i1.path2
novel.4259	TRINITY_DN506_c0_g1_i4.path2	novel.8967	Pepsico1_Contig36864.path2	novel.3004
Pepsico2_Contig7517.path2	TRINITY_DN11195_c1_g1_i1.path2	TRINITY_DN11668_c0_g1_i19.path1	Pepsico2_Contig8385.path1	TRINITY_DN31623_c0_g1_i1.path1
novel.4003	novel.8207	Pepsico1_Contig2258.path1	novel.2441	TRINITY_DN8605_c0_g1_i8.path1
TRINITY_DN19194_c0_g1_i2.path1	novel.3196	novel.4668	TRINITY_DN17432_c0_g1_i2.path2	TRINITY_DN13887_c0_g1_i1.path1
Pepsico2_Contig10529.path2	TRINITY_DN62941_c0_g1_i1.path1	TRINITY_DN12916_c0_g4_i1.path1	novel.2007	novel.7303
novel.5673	TRINITY_DN7275_c0_g2_i2.path1	novel.942	Pepsico1_Contig2216.path2	TRINITY_DN94969_c0_g1_i1.path1
novel.6247	novel.9920	TRINITY_DN5258_c0_g1_i20.path1	Pepsico2_Contig17072.path2	TRINITY_DN27737_c0_g1_i1.path1
TRINITY_DN30783_c0_g1_i6.path1	TRINITY_DN52196_c0_g1_i1.path2	Pepsico2_Contig13783.path2	TRINITY_DN9373_c0_g1_i6.path1	Pepsico2_Contig9316.path1
novel.6814	novel.7165	novel.5524	novel.3941	novel.7772
TRINITY_DN52679_c0_g1_i1.path2	novel.1368	novel.1709	TRINITY_DN4798_c1_g1_i7.path2	TRINITY_DN19135_c0_g1_i1.path1
novel.6158	TRINITY_DN31207_c0_g1_i1.path1	Pepsico1_Contig16695.path1	TRINITY_DN9412_c0_g3_i1.path1	TRINITY_DN9975_c0_g2_i5.path1
TRINITY_DN8148_c0_g1_i1.path2	Pepsico2_Contig19460.path2	novel.5556	TRINITY_DN20748_c0_g2_i1.path1	novel.2927
novel.4737	Pepsico1_Contig3168.path3	TRINITY_DN9600_c0_g1_i1.path1	novel.6441	TRINITY_DN958_c0_g2_i1.path1
TRINITY_DN12913_c0_g3_i1.path1	TRINITY_DN75642_c0_g1_i1.path1	TRINITY_DN11067_c0_g1_i1.path2	novel.6415	TRINITY_DN5337_c0_g1_i4.path1
TRINITY_DN44840_c1_g1_i1.path5	novel.8315	TRINITY_DN37782_c0_g2_i1.path1	Pepsico2_Contig3417.path3	TRINITY_DN8596_c4_g1_i1.path1
novel.2603	TRINITY_DN46281_c0_g1_i1.path3	TRINITY_DN10700_c0_g2_i1.path1	TRINITY_DN13249_c0_g2_i1.path1	novel.8552
TRINITY_DN30601_c0_g1_i1.path1	Pepsico2_Contig5798.path1	TRINITY_DN18897_c2_g1_i1.path1	novel.4638	TRINITY_DN2490_c0_g2_i1.path2
TRINITY_DN57903_c0_g2_i1.path5	novel.8987	TRINITY_DN9236_c0_g2_i5.path1	novel.5381	TRINITY_DN36478_c0_g2_i1.path1
TRINITY_DN13332_c0_g1_i6.path1	TRINITY_DN98034_c0_g1_i1.path2	Pepsico2_Contig12221.path2	TRINITY_DN27_c3_g1_i1.path1	TRINITY_DN99636_c0_g1_i1.path1
Pepsico2_Contig2081.path2	TRINITY_DN20519_c0_g1_i1.path1	TRINITY_DN10686_c1_g1_i1.path1	TRINITY_DN13996_c0_g1_i2.path1	novel.400
novel.2988	TRINITY_DN19565_c0_g1_i3.path1	TRINITY_DN28718_c0_g1_i7.path2	novel.9528	TRINITY_DN13663_c1_g1_i1.path1
TRINITY_DN109564_c0_g1_i1.path1	TRINITY_DN58767_c0_g1_i1.path1	TRINITY_DN83999_c0_g1_i1.path1	Pepsico2_Contig20590.path1	Pepsico1_Contig3579.path1
novel.7468	novel.1524	novel.6169	Pepsico1_Contig526.path2	TRINITY_DN25217_c0_g1_i1.path1
TRINITY_DN20418_c0_g1_i1.path1	TRINITY_DN21802_c0_g2_i1.path1	novel.9029	novel.1524	TRINITY_DN57575_c0_g1_i2.path2
novel.9027	novel.8272	TRINITY_DN6677_c0_g2_i2.path1	TRINITY_DN2753_c0_g1_i1.path1	novel.2885
Pepsico1_Contig30037.path1	novel.9021	novel.4528	novel.5	Pepsico2_Contig20592.path1
TRINITY_DN18694_c0_g1_i1.path1	TRINITY_DN15354_c1_g2_i1.path1	TRINITY_DN16283_c0_g2_i1.path1	Pepsico2_Contig12701.path2	TRINITY_DN9943_c1_g1_i1.path1
novel.7650	Pepsico1_Contig7140.path1	TRINITY_DN49890_c0_g1_i1.path1	Pepsico2_Contig19956.path1	TRINITY_DN65604_c0_g1_i1.path1
novel.2853	TRINITY_DN88746_c0_g1_i1.path1	novel.7206	TRINITY_DN11522_c0_g1_i4.path2	novel.1557
novel.6808	Pepsico2_Contig18542.path1	TRINITY_DN45971_c0_g1_i3.path1	novel.10326	TRINITY_DN106731_c0_g1_i1.path1
novel.8116	novel.1517	TRINITY_DN25777_c0_g1_i1.path4	novel.1672	TRINITY_DN25384_c0_g1_i1.path1
TRINITY_DN22497_c1_g2_i1.path1	TRINITY_DN27316_c0_g1_i2.path1	TRINITY_DN4515_c0_g1_i17.path2	novel.3027	TRINITY_DN3922_c0_g1_i1.path3
TRINITY_DN4954_c0_g2_i1.path2	TRINITY_DN25777_c0_g1_i1.path4	novel.7474	novel.6165	novel.7842
TRINITY_DN5439_c0_g1_i1.path1	TRINITY_DN22267_c0_g1_i4.path1	TRINITY_DN4515_c0_g1_i17.path1	novel.4085	novel.5079
novel.1510	TRINITY_DN79182_c0_g1_i1.path1	TRINITY_DN13881_c0_g2_i8.path2	Pepsico2_Contig20050.path1	Pepsico1_Contig37632.path2
novel.4469	TRINITY_DN9608_c0_g2_i2.path2	TRINITY_DN23852_c0_g1_i1.path1	novel.7970	TRINITY_DN30818_c0_g1_i1.path1
novel.8327	novel.9826	Pepsico2_Contig10142.path1	TRINITY_DN7190_c0_g3_i1.path1	novel.10573
novel.8204	Pepsico2_Contig8385.path1	TRINITY_DN24906_c0_g1_i3.path1	Pepsico2_Contig11219.path2	novel.620
TRINITY_DN23984_c0_g1_i1.path1	TRINITY_DN17599_c0_g1_i1.path1	Pepsico1_Contig17817.path1	TRINITY_DN23431_c0_g1_i2.path1	TRINITY_DN35708_c0_g1_i1.path1
novel.2260	TRINITY_DN2180_c0_g1_i3.path1	Pepsico2_Contig19932.path1	novel.4595	novel.5592
TRINITY_DN25826_c0_g2_i1.path1	TRINITY_DN2657_c0_g1_i2.path1	TRINITY_DN77785_c0_g1_i1.path2	TRINITY_DN68790_c0_g1_i1.path1	novel.6138
Pepsico2_Contig12464.path1	novel.9371	TRINITY_DN6513_c0_g2_i1.path1	novel.7149	TRINITY_DN65319_c0_g1_i1.path1
TRINITY_DN11360_c0_g1_i1.path1	novel.7125	TRINITY_DN21086_c0_g1_i1.path1	TRINITY_DN4942_c0_g1_i2.path2	novel.5907
Pepsico1_Contig92.path1	Pepsico1_Contig35386.path2	novel.2619	novel.9955	TRINITY_DN64736_c0_g1_i1.path2
TRINITY_DN89619_c0_g1_i1.path1	TRINITY_DN22767_c0_g1_i1.path4	TRINITY_DN112261_c0_g1_i1.path1	TRINITY_DN74032_c0_g1_i1.path2	novel.774
TRINITY_DN11705_c0_g1_i1.path1	TRINITY_DN16393_c0_g1_i1.path1	TRINITY_DN8639_c0_g2_i1.path5	TRINITY_DN5732_c0_g1_i3.path2	novel.6341
Pepsico1_Contig7140.path1	TRINITY_DN16976_c0_g1_i9.path2	Pepsico2_Contig14557.path1	TRINITY_DN1550_c3_g1_i2.path1	TRINITY_DN11035_c0_g3_i5.path1
TRINITY_DN46317_c0_g1_i1.path2	novel.1786	TRINITY_DN12922_c0_g1_i4.path2	TRINITY_DN1167_c0_g2_i1.path1	TRINITY_DN106173_c0_g1_i1.path1
novel.83	novel.4783	novel.7670	TRINITY_DN15087_c1_g1_i1.path1	novel.1510
TRINITY_DN4494_c0_g2_i2.path1	novel.10504	TRINITY_DN20136_c1_g1_i1.path1	TRINITY_DN6533_c0_g1_i1.path1	TRINITY_DN7118_c1_g2_i1.path1
novel.63	TRINITY_DN40642_c0_g1_i1.path3	novel.6333	Pepsico1_Contig35386.path2	TRINITY_DN109695_c0_g1_i1.path1
TRINITY_DN42872_c0_g1_i1.path1	TRINITY_DN5816_c1_g1_i1.path1	novel.6106	TRINITY_DN8605_c0_g1_i8.path1	novel.386
TRINITY_DN5322_c0_g2_i1.path1	TRINITY_DN9608_c0_g1_i4.path2	TRINITY_DN16742_c0_g2_i1.path1	novel.6216	novel.2559
novel.324	novel.8224	TRINITY_DN44309_c1_g1_i2.path1	TRINITY_DN11054_c1_g2_i2.path1	Pepsico2_Contig2408.path3
TRINITY_DN32251_c0_g1_i1.path1	TRINITY_DN588_c0_g2_i1.path1	novel.6586	novel.7658	TRINITY_DN19898_c0_g5_i2.path1
TRINITY_DN9204_c0_g2_i4.path1	novel.1770	Pepsico2_Contig9117.path1	Pepsico2_Contig19795.path1	TRINITY_DN24920_c1_g1_i1.path1
Pepsico1_Contig5362.path2	novel.1140	TRINITY_DN56751_c0_g3_i1.path1	novel.2734	novel.10075
novel.7299	TRINITY_DN7983_c0_g1_i3.path2	Pepsico2_Contig8093.path2	novel.4699	TRINITY_DN21382_c1_g1_i1.path1
novel.7251	TRINITY_DN16565_c0_g1_i1.path1	Pepsico2_Contig2458.path1	TRINITY_DN8779_c0_g2_i3.path2	novel.4464
novel.5667	novel.6930	TRINITY_DN23584_c0_g1_i4.path2	TRINITY_DN35418_c0_g2_i1.path1	novel.2288
TRINITY_DN7926_c3_g1_i1.path1	novel.6164	novel.5907	TRINITY_DN44751_c0_g1_i1.path1	TRINITY_DN30719_c0_g1_i1.path2
Pepsico2_Contig20185.path1	novel.5224	TRINITY_DN1258_c0_g8_i1.path1	Pepsico1_Contig31538.path1	TRINITY_DN1240_c0_g2_i1.path2
novel.1419	Pepsico1_Contig27163.path2	novel.1387	TRINITY_DN42395_c0_g1_i1.path1	novel.1731
TRINITY_DN26499_c0_g3_i2.path2	novel.3577	TRINITY_DN16507_c0_g1_i2.path1	novel.8996	novel.3196
novel.1690	Pepsico2_Contig19157.path1	TRINITY_DN46635_c0_g1_i3.path3	Pepsico1_Contig4680.path1	Pepsico1_Contig3833.path2
Pepsico2_Contig18201.path1	TRINITY_DN33167_c0_g1_i2.path1	TRINITY_DN3197_c0_g2_i1.path1	novel.403	TRINITY_DN8575_c0_g2_i5.path2
TRINITY_DN13856_c2_g1_i1.path2	novel.9805	novel.5856	novel.6356	novel.7026
novel.7474	TRINITY_DN11785_c1_g1_i1.path1	TRINITY_DN4252_c0_g3_i1.path2	TRINITY_DN9377_c0_g5_i1.path1	novel.3378
TRINITY_DN21382_c1_g1_i1.path1	TRINITY_DN8753_c0_g1_i3.path1	novel.1655	novel.1709	novel.8079
TRINITY_DN25377_c0_g1_i2.path1	TRINITY_DN12102_c0_g1_i2.path1	novel.9258	Pepsico2_Contig12616.path1	Pepsico2_Contig4927.path1
novel.9394	TRINITY_DN8070_c0_g1_i2.path1	Pepsico1_Contig556.path1	Pepsico2_Contig9341.path1	Pepsico1_Contig32400.path1
TRINITY_DN16570_c0_g1_i4.path1	Pepsico2_Contig9193.path1	novel.7658	TRINITY_DN49776_c0_g1_i1.path3	Pepsico1_Contig36309.path1
novel.10067	TRINITY_DN27638_c0_g1_i9.path1	Pepsico1_Contig35386.path2	Pepsico1_Contig3804.path1	novel.9510
novel.7175	TRINITY_DN8122_c0_g1_i5.path1	Pepsico2_Contig14014.path1	novel.3378	TRINITY_DN16507_c0_g1_i2.path1
Pepsico1_Contig4097.path1	novel.8327	TRINITY_DN99434_c0_g1_i1.path1	Pepsico1_Contig32100.path1	novel.5969
novel.3110	TRINITY_DN53146_c0_g1_i2.path1	TRINITY_DN5893_c0_g1_i1.path1	novel.1757	novel.6159
TRINITY_DN10295_c0_g2_i1.path1	novel.6825	TRINITY_DN21761_c0_g1_i1.path2	TRINITY_DN13351_c0_g1_i2.path2	TRINITY_DN83999_c0_g1_i1.path1
TRINITY_DN55971_c0_g1_i1.path1	Pepsico2_Contig1590.path1	TRINITY_DN4488_c1_g1_i2.path1	TRINITY_DN10332_c0_g2_i2.path1	novel.9390
novel.4486	Pepsico2_Contig11059.path1	novel.7300	TRINITY_DN17604_c0_g2_i4.path1	novel.5798
TRINITY_DN54033_c0_g2_i2.path2	novel.1537	TRINITY_DN43172_c0_g1_i1.path2	novel.10087	TRINITY_DN32157_c1_g1_i2.path1
TRINITY_DN53146_c0_g1_i2.path1	TRINITY_DN31623_c1_g1_i1.path1	Pepsico2_Contig2180.path1	Pepsico2_Contig19897.path2	TRINITY_DN11406_c0_g1_i1.path2
TRINITY_DN13887_c0_g1_i1.path1	TRINITY_DN95555_c0_g1_i1.path1	novel.6807	TRINITY_DN2548_c0_g1_i5.path1	novel.6937
novel.10537	Pepsico1_Contig4160.path1	TRINITY_DN87711_c0_g1_i1.path1	novel.6245	novel.4737
TRINITY_DN107476_c0_g1_i1.path1	novel.360	TRINITY_DN18237_c1_g3_i1.path1	TRINITY_DN44615_c1_g2_i1.path1	TRINITY_DN8002_c0_g1_i1.path1
Pepsico2_Contig14533.path1	TRINITY_DN13542_c0_g1_i1.path2	Pepsico2_Contig19542.path1	TRINITY_DN19404_c0_g1_i1.path1	novel.9610
TRINITY_DN27741_c0_g1_i1.path1	TRINITY_DN9300_c0_g1_i5.path3	TRINITY_DN8509_c0_g1_i3.path1	TRINITY_DN1258_c0_g9_i1.path1	TRINITY_DN8992_c0_g2_i1.path1
TRINITY_DN37891_c0_g3_i1.path1	TRINITY_DN20293_c0_g1_i1.path1	novel.3577	TRINITY_DN68988_c0_g1_i1.path2	Pepsico1_Contig25437.path1
novel.1475	TRINITY_DN24481_c0_g1_i3.path1	TRINITY_DN27308_c0_g1_i1.path1	TRINITY_DN28605_c0_g3_i3.path1	TRINITY_DN25489_c0_g1_i1.path1
novel.6151	novel.1783	TRINITY_DN18638_c0_g1_i1.path1	TRINITY_DN15668_c0_g2_i1.path1	TRINITY_DN35061_c1_g1_i2.path1
novel.3655	TRINITY_DN13432_c0_g1_i1.path1	Pepsico2_Contig6342.path1	novel.10109	TRINITY_DN37797_c0_g2_i1.path1
novel.2890	TRINITY_DN89_c0_g1_i9.path1	Pepsico2_Contig746.path1	novel.9990	novel.10593
TRINITY_DN1380_c0_g1_i2.path2	TRINITY_DN3216_c0_g1_i3.path2	novel.4835	TRINITY_DN75397_c0_g1_i1.path1	TRINITY_DN13856_c2_g1_i1.path2
novel.10329	TRINITY_DN27290_c0_g1_i1.path1	novel.2442	novel.10179	novel.9410
novel.2828	TRINITY_DN15850_c0_g1_i2.path1	TRINITY_DN22428_c1_g1_i2.path1	TRINITY_DN17070_c0_g2_i3.path1	TRINITY_DN73325_c0_g1_i1.path1
TRINITY_DN17803_c1_g2_i1.path1	novel.1070	TRINITY_DN6676_c0_g1_i1.path2	TRINITY_DN47897_c0_g1_i1.path1	novel.4459
novel.6823	TRINITY_DN22824_c0_g1_i2.path1	TRINITY_DN25751_c0_g1_i2.path1	Pepsico2_Contig18919.path1	TRINITY_DN75397_c0_g1_i1.path3
TRINITY_DN16918_c0_g1_i7.path2	novel.7670	novel.4361	TRINITY_DN30113_c1_g1_i1.path1	novel.5972
novel.3180	TRINITY_DN49442_c0_g1_i1.path1	novel.9833	novel.4737	novel.10562
TRINITY_DN18327_c0_g4_i1.path1	novel.3530	TRINITY_DN14953_c0_g1_i3.path1	Pepsico1_Contig3802.path1	TRINITY_DN48283_c1_g1_i1.path1
TRINITY_DN17732_c0_g6_i1.path1	TRINITY_DN16513_c0_g1_i5.path1	novel.83	Pepsico2_Contig11358.path1	TRINITY_DN59511_c0_g1_i1.path1
TRINITY_DN64120_c0_g1_i1.path1	Pepsico1_Contig2484.path1	TRINITY_DN27067_c1_g1_i1.path1	Pepsico1_Contig6988.path1	TRINITY_DN7981_c0_g2_i2.path1
TRINITY_DN31614_c0_g1_i3.path1	novel.2648	novel.4284	TRINITY_DN31052_c0_g2_i1.path1	TRINITY_DN20519_c0_g1_i1.path1
Pepsico2_Contig16242.path1	TRINITY_DN10826_c0_g1_i2.path1	TRINITY_DN11265_c0_g1_i9.path1	TRINITY_DN36669_c0_g1_i1.path1	TRINITY_DN112208_c0_g1_i1.path1
TRINITY_DN13653_c0_g1_i2.path1	TRINITY_DN1669_c0_g1_i8.path1	TRINITY_DN12396_c0_g1_i1.path1	TRINITY_DN29776_c0_g2_i1.path1	TRINITY_DN8753_c0_g1_i3.path1
TRINITY_DN15904_c0_g1_i9.path1	Pepsico2_Contig19530.path1	TRINITY_DN101519_c0_g1_i1.path1	Pepsico2_Contig13875.path1	TRINITY_DN13745_c0_g1_i7.path1
Pepsico1_Contig6482.path2	novel.8437	novel.2632	novel.1783	TRINITY_DN11478_c0_g1_i4.path2
novel.8458	novel.4758	novel.6105	novel.6517	novel.8204
Pepsico1_Contig1649.path1	TRINITY_DN5091_c1_g2_i1.path1	TRINITY_DN87130_c0_g1_i1.path1	novel.6196	novel.1924
TRINITY_DN53177_c0_g1_i3.path2	novel.5747	TRINITY_DN13491_c0_g1_i1.path4	TRINITY_DN49735_c0_g1_i1.path1	TRINITY_DN3559_c0_g2_i1.path1
novel.8746	TRINITY_DN50492_c0_g2_i1.path2	TRINITY_DN2548_c0_g1_i5.path1	TRINITY_DN27308_c0_g1_i1.path1	Pepsico2_Contig14039.path1
TRINITY_DN20486_c0_g1_i4.path1	Pepsico2_Contig19388.path2	novel.1892	TRINITY_DN27620_c0_g7_i1.path1	novel.4244
Pepsico2_Contig3671.path1	TRINITY_DN91480_c0_g1_i1.path1	TRINITY_DN16522_c0_g1_i3.path2	TRINITY_DN45793_c0_g1_i1.path1	TRINITY_DN55418_c0_g1_i1.path1
Pepsico2_Contig12299.path1	TRINITY_DN8198_c1_g1_i1.path1	Pepsico2_Contig15299.path2	Pepsico2_Contig21149.path1	novel.1343
novel.4507	Pepsico1_Contig4897.path1	TRINITY_DN107989_c0_g1_i1.path1	TRINITY_DN14238_c1_g1_i1.path1	TRINITY_DN6979_c0_g1_i6.path1
novel.9682	TRINITY_DN92594_c0_g1_i1.path1	TRINITY_DN582_c2_g1_i6.path2	TRINITY_DN13963_c1_g1_i1.path1	TRINITY_DN10891_c0_g1_i1.path3
novel.10247	novel.2553	TRINITY_DN16357_c0_g3_i1.path1	novel.4814	TRINITY_DN16237_c0_g3_i1.path2
TRINITY_DN83545_c0_g1_i1.path1	novel.9227	Pepsico2_Contig18421.path2	TRINITY_DN13703_c0_g1_i2.path2	TRINITY_DN2337_c0_g1_i6.path2
novel.6807	novel.1651	novel.10510	TRINITY_DN20047_c0_g2_i1.path2	TRINITY_DN1258_c0_g4_i2.path1
TRINITY_DN41659_c0_g1_i1.path1	TRINITY_DN11017_c0_g2_i4.path3	novel.9820	novel.5626	novel.3059
novel.10542	TRINITY_DN20097_c0_g1_i1.path1	novel.1115	novel.2368	TRINITY_DN12238_c0_g3_i1.path1
TRINITY_DN50909_c0_g1_i1.path1	TRINITY_DN27841_c0_g1_i1.path1	novel.5616	novel.875	TRINITY_DN107396_c0_g1_i1.path1
TRINITY_DN20156_c0_g1_i2.path2	Pepsico2_Contig15057.path1	novel.5367	TRINITY_DN9829_c0_g1_i3.path1	Pepsico1_Contig6775.path1
novel.403	Pepsico2_Contig18169.path2	Pepsico2_Contig12155.path1	novel.5531	TRINITY_DN12132_c0_g2_i1.path2
novel.7639	TRINITY_DN23273_c0_g1_i2.path1	novel.9995	TRINITY_DN27290_c0_g1_i1.path1	Pepsico2_Contig2570.path3
Pepsico2_Contig2921.path1	novel.9627	TRINITY_DN38413_c0_g1_i1.path1	TRINITY_DN1594_c0_g1_i8.path1	TRINITY_DN64431_c0_g1_i3.path1
Pepsico2_Contig18276.path1	novel.10177	TRINITY_DN8198_c1_g1_i1.path1	TRINITY_DN17893_c0_g1_i3.path1	TRINITY_DN12806_c0_g1_i1.path1
TRINITY_DN22833_c0_g3_i3.path1	novel.2139	novel.4654	novel.9946	TRINITY_DN19684_c1_g1_i1.path1
TRINITY_DN25639_c0_g1_i1.path1	TRINITY_DN102490_c0_g1_i1.path2	Pepsico1_Contig7017.path2	TRINITY_DN11705_c0_g1_i1.path1	TRINITY_DN7934_c2_g1_i7.path1
TRINITY_DN7897_c2_g1_i3.path1	Pepsico1_Contig30037.path1	novel.7766	TRINITY_DN276_c1_g1_i1.path1	TRINITY_DN30446_c0_g1_i1.path2
TRINITY_DN105715_c0_g1_i1.path1	Pepsico2_Contig10332.path1	TRINITY_DN33167_c0_g1_i2.path1	novel.6183	Pepsico2_Contig19897.path2
TRINITY_DN8715_c0_g1_i2.path2	TRINITY_DN3393_c0_g1_i2.path1	Pepsico2_Contig13659.path1	TRINITY_DN10891_c1_g1_i1.path2	TRINITY_DN4449_c0_g1_i3.path1
Pepsico2_Contig14383.path1	novel.148	novel.1916	Pepsico2_Contig16466.path1	TRINITY_DN13940_c0_g1_i1.path1
novel.6502	TRINITY_DN25461_c0_g1_i1.path1	Pepsico2_Contig7855.path1	novel.5673	Pepsico2_Contig9193.path1
TRINITY_DN13645_c0_g2_i1.path2	Pepsico2_Contig1768.path1	TRINITY_DN8820_c0_g1_i1.path1	TRINITY_DN44861_c0_g1_i1.path1	TRINITY_DN79972_c0_g1_i1.path1
novel.2968	Pepsico2_Contig8853.path1	TRINITY_DN21003_c1_g1_i7.path2	novel.6937	novel.1372
Pepsico2_Contig11157.path1	TRINITY_DN2852_c0_g1_i3.path2	TRINITY_DN48822_c0_g1_i2.path1	TRINITY_DN25384_c0_g2_i1.path3	novel.7771
TRINITY_DN8399_c2_g1_i1.path1	TRINITY_DN10252_c0_g1_i3.path2	TRINITY_DN37160_c0_g1_i1.path1	TRINITY_DN18898_c0_g1_i1.path2	TRINITY_DN62021_c0_g1_i1.path1
TRINITY_DN6829_c1_g1_i1.path1	novel.5821	TRINITY_DN8925_c0_g1_i1.path1	novel.2962	TRINITY_DN65545_c0_g1_i1.path1
TRINITY_DN8002_c0_g1_i1.path1	TRINITY_DN23841_c0_g1_i1.path1	TRINITY_DN11187_c0_g1_i1.path1	novel.4541	novel.8019
TRINITY_DN21690_c0_g2_i2.path1	Pepsico1_Contig2324.path2	Pepsico2_Contig5976.path1	novel.6784	TRINITY_DN10366_c1_g3_i1.path1
TRINITY_DN91774_c0_g1_i1.path1	novel.5220	Pepsico2_Contig20218.path1	novel.2781	TRINITY_DN15235_c0_g1_i1.path2
Pepsico1_Contig8217.path2	TRINITY_DN12193_c0_g2_i1.path1	TRINITY_DN24742_c0_g3_i1.path2	TRINITY_DN4108_c0_g1_i5.path2	TRINITY_DN10863_c0_g1_i3.path2
novel.7132	novel.10116	Pepsico2_Contig16099.path1	TRINITY_DN28889_c0_g1_i2.path1	TRINITY_DN12620_c0_g1_i2.path3
TRINITY_DN50836_c0_g1_i1.path1	TRINITY_DN13035_c0_g1_i13.path1	TRINITY_DN30714_c0_g1_i2.path1	Pepsico1_Contig34145.path1	TRINITY_DN12767_c0_g1_i2.path1
Pepsico2_Contig7372.path1	novel.787	novel.133	novel.1378	novel.6045
novel.6794	Pepsico1_Contig37632.path2	TRINITY_DN21288_c0_g2_i2.path1	TRINITY_DN66384_c0_g1_i1.path1	novel.2760
TRINITY_DN90454_c0_g1_i1.path1	TRINITY_DN42872_c0_g1_i1.path1	novel.346	Pepsico2_Contig7708.path1	novel.3159
novel.10251	TRINITY_DN17371_c0_g1_i18.path3	novel.33	novel.2833	novel.4500
TRINITY_DN16511_c0_g1_i6.path1	novel.6955	novel.342	novel.3169	novel.8198
TRINITY_DN39197_c0_g1_i5.path1	TRINITY_DN1380_c0_g1_i2.path2	TRINITY_DN6808_c0_g3_i1.path2	TRINITY_DN4775_c0_g1_i1.path1	TRINITY_DN92110_c0_g1_i1.path1
Pepsico1_Contig38400.path1	TRINITY_DN9335_c0_g1_i7.path2	novel.10224	novel.9771	novel.2472
TRINITY_DN97391_c0_g1_i1.path1	TRINITY_DN5337_c0_g1_i4.path1	novel.9881	TRINITY_DN10664_c1_g6_i1.path2	TRINITY_DN10686_c1_g1_i1.path1
Pepsico2_Contig19917.path4	TRINITY_DN21860_c1_g1_i1.path1	novel.8875	Pepsico2_Contig13308.path1	novel.7021
Pepsico2_Contig17919.path1	TRINITY_DN10709_c0_g1_i3.path2	novel.8889	TRINITY_DN1397_c0_g3_i1.path1	TRINITY_DN20324_c0_g1_i1.path1
TRINITY_DN12224_c0_g1_i6.path2	novel.1120	TRINITY_DN1543_c0_g1_i1.path2	TRINITY_DN20723_c1_g1_i1.path1	novel.7229
novel.1386	Pepsico1_Contig6527.path2	TRINITY_DN37508_c0_g2_i1.path1	novel.1944	TRINITY_DN6400_c0_g1_i1.path1
TRINITY_DN16211_c1_g1_i1.path1	TRINITY_DN27300_c0_g1_i1.path2	TRINITY_DN15612_c0_g1_i10.path3	Pepsico2_Contig19690.path1	TRINITY_DN19110_c0_g3_i1.path1
novel.2751	novel.2890	TRINITY_DN27605_c0_g1_i2.path1	novel.321	novel.9027
novel.2886	TRINITY_DN18284_c0_g1_i2.path1	novel.9751	TRINITY_DN37142_c0_g1_i1.path2	TRINITY_DN25481_c0_g1_i1.path1
TRINITY_DN7356_c0_g1_i8.path1	TRINITY_DN32319_c0_g1_i1.path1	TRINITY_DN9814_c1_g1_i2.path2	TRINITY_DN45102_c0_g1_i3.path1	Pepsico1_Contig5252.path1
Pepsico1_Contig2142.path1	TRINITY_DN22664_c0_g1_i3.path1	Pepsico2_Contig19245.path1	TRINITY_DN29504_c0_g1_i2.path1	TRINITY_DN8198_c0_g1_i2.path1
TRINITY_DN21556_c0_g1_i1.path2	TRINITY_DN38413_c0_g1_i1.path1	TRINITY_DN5669_c0_g1_i1.path1	TRINITY_DN3299_c0_g1_i18.path1	TRINITY_DN13615_c0_g1_i1.path1
novel.4006	TRINITY_DN5322_c0_g2_i1.path1	novel.1177	TRINITY_DN30361_c0_g1_i2.path1	TRINITY_DN13542_c0_g1_i1.path2
novel.1891	Pepsico2_Contig12412.path1	TRINITY_DN7691_c0_g2_i1.path1	TRINITY_DN2140_c0_g2_i1.path1	TRINITY_DN25384_c0_g1_i1.path2
TRINITY_DN15712_c0_g1_i2.path1	novel.107	novel.7095	TRINITY_DN9558_c0_g1_i5.path1	TRINITY_DN73289_c0_g1_i1.path1
TRINITY_DN20519_c0_g1_i1.path1	TRINITY_DN18035_c0_g2_i2.path1	novel.51	Pepsico1_Contig28299.path1	TRINITY_DN17309_c0_g1_i8.path2
novel.8141	novel.8005	TRINITY_DN17599_c0_g1_i1.path1	Pepsico2_Contig19574.path1	TRINITY_DN22358_c0_g1_i2.path1
TRINITY_DN53356_c0_g1_i3.path2	novel.133	TRINITY_DN34274_c0_g1_i1.path1	Pepsico2_Contig12221.path2	Pepsico1_Contig2504.path1
novel.148	novel.7437	novel.1538	TRINITY_DN37516_c0_g1_i1.path1	novel.2965
TRINITY_DN42661_c0_g1_i1.path3	TRINITY_DN61198_c0_g1_i1.path1	novel.8942	novel.324	novel.932
TRINITY_DN21106_c0_g1_i1.path2	novel.7858	TRINITY_DN13305_c0_g1_i1.path1	novel.10174	TRINITY_DN32500_c0_g1_i1.path1
novel.6104	TRINITY_DN18193_c0_g2_i1.path2	novel.656	Pepsico2_Contig7607.path2	TRINITY_DN14890_c1_g1_i1.path1
novel.1524	Pepsico2_Contig7596.path1	TRINITY_DN19732_c1_g1_i2.path1	Pepsico2_Contig16099.path1	TRINITY_DN13858_c0_g1_i1.path1
TRINITY_DN24254_c0_g1_i2.path1	TRINITY_DN3299_c0_g1_i18.path1	TRINITY_DN71605_c0_g1_i1.path1	TRINITY_DN18638_c0_g1_i1.path1	novel.5748
TRINITY_DN3106_c1_g1_i1.path1	Pepsico2_Contig14690.path1	novel.7345	novel.774	novel.10216
novel.7502	TRINITY_DN16357_c0_g3_i1.path1	Pepsico2_Contig20227.path3	novel.5969	TRINITY_DN20136_c1_g1_i1.path1
TRINITY_DN12913_c0_g4_i1.path1	TRINITY_DN576_c0_g3_i8.path2	TRINITY_DN1030_c0_g1_i11.path1	novel.12	TRINITY_DN11825_c1_g3_i1.path1
TRINITY_DN2389_c0_g1_i4.path1	novel.8977	TRINITY_DN98903_c0_g1_i1.path1	TRINITY_DN104216_c0_g1_i1.path1	novel.8099
Pepsico2_Contig27.path1	novel.4464	novel.8659	novel.3190	TRINITY_DN4050_c1_g1_i10.path1
novel.8535	novel.7148	novel.10349	novel.9872	Pepsico2_Contig19932.path1
novel.7970	TRINITY_DN56751_c0_g3_i1.path1	novel.2648	novel.2552	TRINITY_DN16565_c0_g1_i1.path1
TRINITY_DN45363_c0_g1_i1.path2	Pepsico2_Contig8115.path1	TRINITY_DN88045_c0_g1_i1.path1	Pepsico2_Contig19194.path2	Pepsico2_Contig20667.path1
novel.2782	TRINITY_DN59441_c0_g1_i2.path3	TRINITY_DN94912_c0_g1_i1.path1	Pepsico2_Contig6083.path1	novel.1891
novel.1363	novel.203	novel.107	TRINITY_DN18020_c0_g1_i5.path1	Pepsico1_Contig3923.path1
novel.8818	novel.3765	TRINITY_DN25501_c0_g1_i1.path1	TRINITY_DN44353_c0_g1_i1.path1	TRINITY_DN17371_c0_g1_i18.path3
TRINITY_DN27422_c0_g1_i2.path1	novel.10624	novel.2532	novel.5907	novel.5381
TRINITY_DN4942_c0_g1_i2.path2	TRINITY_DN26947_c0_g1_i2.path1	Pepsico2_Contig9123.path2	novel.4500	novel.972
TRINITY_DN11608_c2_g1_i1.path1	TRINITY_DN21963_c0_g5_i1.path1	Pepsico2_Contig10474.path1	Pepsico1_Contig340.path1	novel.7251
TRINITY_DN52145_c0_g1_i1.path4	TRINITY_DN12218_c0_g1_i4.path1	Pepsico2_Contig3282.path1	TRINITY_DN20215_c0_g1_i3.path1	novel.2676
TRINITY_DN9734_c0_g2_i1.path1	novel.7735	novel.4509	Pepsico2_Contig17265.path1	novel.1365
TRINITY_DN1122_c0_g4_i2.path2	Pepsico2_Contig14412.path3	TRINITY_DN30535_c3_g1_i1.path1	novel.1573	Pepsico2_Contig1979.path1
Pepsico2_Contig8556.path2	Pepsico1_Contig1382.path2	TRINITY_DN92905_c0_g1_i1.path2	novel.8314	TRINITY_DN12383_c0_g1_i2.path1
TRINITY_DN9814_c1_g1_i2.path2	TRINITY_DN14953_c0_g1_i3.path1	Pepsico2_Contig6378.path1	TRINITY_DN10323_c0_g1_i5.path1	Pepsico1_Contig34145.path1
novel.10460	novel.90	TRINITY_DN5970_c0_g2_i1.path2	novel.1397	TRINITY_DN10750_c0_g1_i2.path1
TRINITY_DN12126_c0_g1_i1.path2	TRINITY_DN25501_c0_g1_i1.path1	TRINITY_DN34598_c0_g1_i2.path1	TRINITY_DN11130_c0_g1_i11.path1	novel.2139
novel.918	novel.181	Pepsico2_Contig12543.path1	TRINITY_DN12408_c0_g2_i2.path1	novel.6055
TRINITY_DN45842_c0_g1_i1.path2	novel.7500	novel.7842	Pepsico1_Contig37533.path4	novel.2583
TRINITY_DN6494_c0_g1_i1.path1	TRINITY_DN16607_c0_g4_i3.path3	novel.1693	TRINITY_DN16393_c1_g1_i1.path2	TRINITY_DN15610_c0_g2_i1.path1
novel.8582	Pepsico2_Contig19542.path1	novel.8916	Pepsico2_Contig4749.path1	novel.7469
TRINITY_DN13946_c0_g1_i2.path1	TRINITY_DN30783_c0_g1_i6.path1	novel.7336	TRINITY_DN9621_c0_g1_i4.path3	TRINITY_DN95630_c0_g1_i1.path1
TRINITY_DN102464_c0_g1_i1.path2	TRINITY_DN3739_c0_g1_i2.path1	TRINITY_DN33054_c1_g1_i1.path1	TRINITY_DN6047_c1_g1_i1.path1	TRINITY_DN43172_c0_g1_i1.path2
novel.10177	TRINITY_DN24214_c0_g2_i1.path1	TRINITY_DN1195_c0_g5_i1.path2	novel.6345	TRINITY_DN26074_c0_g1_i1.path1
novel.1783	Pepsico2_Contig337.path1	novel.2645	novel.1191	novel.4421
TRINITY_DN51761_c3_g2_i3.path1	TRINITY_DN20418_c0_g1_i1.path1	TRINITY_DN27638_c0_g1_i9.path1	TRINITY_DN383_c1_g2_i1.path1	Pepsico2_Contig9970.path1
TRINITY_DN23201_c0_g1_i2.path2	novel.474	novel.1114	novel.9685	TRINITY_DN14238_c1_g1_i1.path1
novel.8995	Pepsico1_Contig5607.path1	Pepsico1_Contig7054.path2	novel.9486	TRINITY_DN13444_c0_g1_i1.path1
TRINITY_DN25471_c0_g1_i4.path1	TRINITY_DN71897_c0_g1_i1.path3	Pepsico2_Contig14026.path1	novel.4584	TRINITY_DN23948_c0_g1_i1.path1
novel.7425	novel.6523	Pepsico1_Contig3357.path1	novel.3946	novel.3660
novel.1646	novel.1189	novel.5774	novel.8061	Pepsico2_Contig14019.path1
novel.7836	Pepsico1_Contig556.path1	novel.349	Pepsico1_Contig1338.path2	TRINITY_DN21078_c0_g3_i2.path1
novel.8224	TRINITY_DN8516_c0_g1_i1.path1	TRINITY_DN15354_c1_g2_i1.path1	TRINITY_DN4225_c0_g1_i11.path1	TRINITY_DN109518_c0_g1_i1.path3
novel.181	TRINITY_DN21357_c0_g1_i1.path1	novel.8188	novel.3567	novel.5213
TRINITY_DN10564_c1_g3_i3.path2	Pepsico2_Contig13314.path2	TRINITY_DN111423_c0_g1_i1.path1	TRINITY_DN54354_c0_g1_i1.path1	novel.6079
TRINITY_DN32683_c0_g1_i1.path1	novel.2957	TRINITY_DN29938_c0_g1_i1.path1	novel.8928	Pepsico1_Contig5480.path2
Pepsico1_Contig6958.path2	TRINITY_DN26562_c0_g1_i1.path1	TRINITY_DN53177_c0_g1_i3.path2	novel.3766	TRINITY_DN5821_c0_g1_i8.path2
novel.7456	TRINITY_DN7475_c0_g2_i1.path1	TRINITY_DN11608_c0_g3_i3.path1	Pepsico1_Contig15443.path1	TRINITY_DN17080_c0_g2_i1.path1
novel.2971	novel.6586	novel.6649	novel.9707	Pepsico2_Contig8532.path2
Pepsico2_Contig4522.path1	Pepsico2_Contig16352.path2	TRINITY_DN23219_c0_g5_i1.path1	novel.6138	TRINITY_DN26746_c0_g1_i1.path1
TRINITY_DN14779_c0_g2_i1.path1	TRINITY_DN36669_c0_g1_i1.path1	TRINITY_DN1380_c0_g1_i2.path2	Pepsico2_Contig3196.path1	TRINITY_DN17599_c0_g1_i1.path1
Pepsico1_Contig27196.path1	novel.5005	TRINITY_DN20519_c0_g1_i1.path1	novel.8823	novel.7437
TRINITY_DN35686_c0_g2_i1.path1	novel.3854	TRINITY_DN57429_c0_g1_i1.path1	Pepsico1_Contig3210.path1	TRINITY_DN3299_c0_g1_i18.path1
TRINITY_DN19075_c0_g1_i3.path1	TRINITY_DN25430_c0_g1_i2.path2	TRINITY_DN108478_c0_g1_i1.path4	Pepsico1_Contig4907.path2	Pepsico2_Contig1209.path1
novel.10052	TRINITY_DN46537_c0_g1_i2.path1	TRINITY_DN12086_c0_g2_i2.path1	TRINITY_DN45971_c0_g1_i3.path1	TRINITY_DN9236_c0_g2_i5.path1
TRINITY_DN6550_c0_g1_i1.path3	novel.1781	TRINITY_DN19173_c0_g1_i3.path2	novel.6209	novel.811
TRINITY_DN26345_c0_g1_i1.path1	TRINITY_DN8849_c1_g1_i7.path1	novel.1368	TRINITY_DN8659_c0_g2_i1.path1	TRINITY_DN4463_c0_g1_i6.path1
novel.9456	TRINITY_DN8756_c10_g1_i1.path1	Pepsico2_Contig12548.path1	novel.9855	Pepsico1_Contig1024.path1
TRINITY_DN9843_c0_g1_i3.path1	TRINITY_DN22428_c1_g1_i2.path1	TRINITY_DN22311_c0_g1_i7.path1	novel.9391	novel.508
TRINITY_DN306_c0_g1_i5.path1	Pepsico2_Contig14825.path1	TRINITY_DN29073_c0_g1_i3.path2	TRINITY_DN6513_c0_g2_i1.path1	novel.356
novel.6651	TRINITY_DN15645_c1_g1_i8.path1	TRINITY_DN24094_c0_g1_i2.path1	TRINITY_DN94969_c0_g1_i1.path1	Pepsico2_Contig8726.path1
novel.3665	novel.6441	TRINITY_DN47488_c0_g2_i1.path1	TRINITY_DN24113_c3_g2_i1.path1	Pepsico2_Contig9541.path1
TRINITY_DN6808_c0_g3_i1.path2	Pepsico2_Contig7545.path2	TRINITY_DN14475_c0_g2_i3.path1	novel.8125	TRINITY_DN9148_c0_g1_i1.path2
novel.3659	TRINITY_DN25280_c2_g1_i1.path1	TRINITY_DN17371_c0_g2_i2.path4	TRINITY_DN21003_c1_g1_i7.path2	novel.6716
TRINITY_DN19259_c1_g1_i1.path1	Pepsico2_Contig12172.path1	novel.5916	Pepsico2_Contig11466.path1	TRINITY_DN26449_c0_g1_i1.path2
TRINITY_DN8605_c0_g1_i8.path1	TRINITY_DN19477_c0_g1_i2.path1	novel.5271	novel.3824	TRINITY_DN67225_c0_g1_i1.path4
Pepsico2_Contig15984.path2	Pepsico1_Contig38302.path1	novel.8976	novel.1224	TRINITY_DN77785_c0_g1_i1.path2
novel.7735	TRINITY_DN7242_c0_g1_i2.path1	Pepsico1_Contig2504.path1	novel.4259	novel.4507
novel.1050	TRINITY_DN60222_c0_g1_i2.path1	novel.8258	TRINITY_DN31406_c0_g3_i1.path1	novel.1913
Pepsico2_Contig11409.path1	novel.8991	novel.2964	TRINITY_DN29283_c0_g1_i1.path2	TRINITY_DN101536_c0_g1_i1.path1
TRINITY_DN5591_c0_g1_i3.path1	novel.6807	TRINITY_DN17019_c5_g1_i1.path1	novel.8659	Pepsico1_Contig32793.path1
Pepsico2_Contig13209.path1	novel.9015	novel.9955	TRINITY_DN5931_c0_g1_i7.path1	novel.3577
novel.675	TRINITY_DN28234_c0_g2_i1.path2	novel.3012	novel.9332	novel.8928
TRINITY_DN44309_c1_g1_i2.path1	Pepsico2_Contig3005.path1	novel.7469	TRINITY_DN20133_c0_g1_i3.path2	Pepsico1_Contig1072.path1
Pepsico1_Contig2324.path2	TRINITY_DN4288_c0_g1_i3.path1	TRINITY_DN12620_c0_g1_i2.path3	novel.158	TRINITY_DN19079_c0_g1_i1.path1
TRINITY_DN115535_c0_g1_i1.path5	novel.616	TRINITY_DN17221_c0_g1_i5.path2	TRINITY_DN57700_c0_g1_i1.path1	TRINITY_DN26591_c0_g1_i1.path1
Pepsico2_Contig204.path2	TRINITY_DN19341_c0_g1_i1.path2	TRINITY_DN11357_c0_g1_i1.path1	novel.3854	TRINITY_DN41708_c0_g2_i6.path1
TRINITY_DN34205_c0_g1_i1.path1	TRINITY_DN32457_c0_g1_i1.path2	novel.751	TRINITY_DN71109_c0_g1_i1.path2	TRINITY_DN39072_c0_g1_i1.path2
TRINITY_DN19684_c1_g1_i1.path1	novel.5271	TRINITY_DN16102_c0_g1_i2.path2	novel.2763	novel.4164
TRINITY_DN13816_c0_g2_i1.path1	novel.4882	novel.9782	novel.7766	TRINITY_DN80213_c0_g1_i1.path1
novel.5255	TRINITY_DN11429_c1_g1_i3.path1	TRINITY_DN21382_c1_g1_i1.path1	TRINITY_DN23201_c0_g1_i2.path2	Pepsico2_Contig6836.path1
Pepsico1_Contig2275.path1	TRINITY_DN23584_c0_g1_i4.path2	novel.7294	novel.5671	TRINITY_DN69401_c0_g1_i1.path1
TRINITY_DN9335_c0_g1_i7.path2	TRINITY_DN22779_c0_g1_i1.path1	TRINITY_DN17358_c1_g3_i2.path1	TRINITY_DN15969_c0_g1_i3.path1	Pepsico1_Contig36221.path1
novel.7062	TRINITY_DN10905_c0_g1_i6.path2	TRINITY_DN14491_c0_g1_i4.path1	TRINITY_DN34430_c1_g1_i1.path1	novel.4346
novel.1464	TRINITY_DN50909_c0_g1_i1.path1	novel.3651	novel.4471	novel.5042
novel.2079	TRINITY_DN24316_c0_g1_i3.path1	novel.9905	Pepsico2_Contig2456.path2	Pepsico2_Contig5879.path1
TRINITY_DN75642_c0_g1_i1.path1	novel.4734	novel.10071	novel.5798	Pepsico2_Contig13814.path1
novel.4211	novel.1221	Pepsico2_Contig18201.path1	TRINITY_DN11608_c0_g3_i3.path1	TRINITY_DN11731_c0_g3_i1.path1
TRINITY_DN89062_c0_g1_i1.path1	TRINITY_DN10564_c1_g2_i1.path1	TRINITY_DN85720_c0_g1_i1.path3	novel.4026	TRINITY_DN9384_c0_g1_i3.path1
novel.3834	novel.8805	TRINITY_DN25217_c0_g1_i1.path1	TRINITY_DN11414_c1_g1_i1.path1	TRINITY_DN89_c0_g1_i9.path2
TRINITY_DN7412_c0_g1_i1.path1	TRINITY_DN2294_c1_g3_i1.path2	novel.10075	TRINITY_DN22824_c0_g1_i2.path1	TRINITY_DN40802_c0_g3_i1.path2
novel.8553	TRINITY_DN21382_c1_g1_i1.path1	TRINITY_DN105250_c0_g1_i1.path3	Pepsico2_Contig15240.path1	Pepsico2_Contig19194.path2
TRINITY_DN1911_c0_g1_i10.path1	TRINITY_DN25070_c0_g1_i1.path2	Pepsico2_Contig1768.path1	novel.8929	TRINITY_DN97688_c0_g1_i1.path1
Pepsico2_Contig2197.path1	TRINITY_DN3027_c0_g1_i4.path1	Pepsico1_Contig1451.path1	TRINITY_DN9602_c0_g2_i2.path1	novel.7642
TRINITY_DN61083_c0_g2_i1.path1	novel.2964	novel.9370	TRINITY_DN8714_c0_g1_i6.path1	TRINITY_DN108784_c0_g1_i1.path2
TRINITY_DN9608_c0_g2_i2.path2	TRINITY_DN107476_c0_g1_i1.path1	TRINITY_DN10070_c0_g2_i4.path1	TRINITY_DN9250_c1_g1_i1.path2	TRINITY_DN21106_c0_g1_i1.path3
TRINITY_DN91900_c0_g1_i1.path1	novel.9665	TRINITY_DN23034_c0_g1_i1.path1	TRINITY_DN21288_c0_g2_i2.path1	TRINITY_DN88734_c0_g1_i1.path1
novel.5012	novel.8553	TRINITY_DN2504_c2_g1_i1.path3	TRINITY_DN1258_c0_g4_i2.path1	TRINITY_DN66806_c0_g1_i1.path1
TRINITY_DN10559_c0_g1_i12.path1	TRINITY_DN32251_c0_g1_i1.path1	novel.7735	Pepsico2_Contig17223.path2	TRINITY_DN23463_c1_g1_i1.path1
TRINITY_DN19086_c0_g1_i2.path1	Pepsico2_Contig1209.path1	TRINITY_DN27978_c0_g2_i1.path1	Pepsico1_Contig916.path1	TRINITY_DN2266_c0_g1_i4.path2
TRINITY_DN30963_c0_g1_i1.path1	TRINITY_DN86160_c0_g1_i1.path1	TRINITY_DN1968_c0_g1_i4.path1	TRINITY_DN493_c0_g3_i1.path2	novel.10551
TRINITY_DN57413_c0_g2_i1.path1	TRINITY_DN15407_c0_g1_i3.path2	TRINITY_DN14890_c1_g1_i1.path1	TRINITY_DN6565_c0_g1_i3.path1	novel.5974
TRINITY_DN42796_c0_g1_i4.path4	novel.2988	novel.2973	TRINITY_DN23242_c0_g2_i5.path1	Pepsico1_Contig36264.path1
novel.2005	novel.8808	TRINITY_DN77068_c0_g1_i1.path2	novel.6037	TRINITY_DN13490_c0_g1_i5.path1
Pepsico2_Contig11484.path2	novel.8258	TRINITY_DN10796_c0_g1_i1.path1	Pepsico1_Contig17817.path1	novel.5146
novel.8299	TRINITY_DN7934_c2_g5_i1.path2	TRINITY_DN88881_c0_g1_i1.path1	novel.4346	TRINITY_DN16355_c0_g1_i5.path1
TRINITY_DN18442_c1_g1_i2.path2	Pepsico2_Contig16099.path1	TRINITY_DN86093_c0_g1_i1.path1	TRINITY_DN19075_c0_g1_i3.path1	novel.3394
TRINITY_DN12045_c0_g1_i2.path1	TRINITY_DN49704_c0_g1_i1.path1	TRINITY_DN24412_c0_g1_i5.path1	novel.10078	novel.4018
TRINITY_DN23431_c0_g1_i2.path1	novel.7424	Pepsico2_Contig12951.path1	novel.7492	Pepsico1_Contig51.path1
Pepsico2_Contig8093.path2	Pepsico2_Contig16837.path1	Pepsico2_Contig14269.path1	novel.8232	Pepsico2_Contig14026.path1
Pepsico1_Contig36.path1	TRINITY_DN10718_c0_g4_i1.path1	TRINITY_DN19075_c0_g1_i3.path1	TRINITY_DN6544_c0_g2_i1.path1	novel.9387
novel.9815	novel.5316	TRINITY_DN24001_c0_g1_i1.path1	TRINITY_DN70282_c0_g1_i1.path1	Pepsico1_Contig1795.path2
novel.8258	novel.5277	novel.5932	novel.661	novel.9016
TRINITY_DN73847_c0_g1_i1.path1	Pepsico2_Contig18212.path1	Pepsico2_Contig7478.path1	novel.6823	TRINITY_DN17530_c0_g1_i1.path2
TRINITY_DN13856_c2_g1_i1.path1	TRINITY_DN7118_c1_g2_i1.path1	TRINITY_DN25759_c0_g1_i1.path1	novel.10308	novel.7138
novel.10498	TRINITY_DN27835_c0_g1_i1.path2	TRINITY_DN7356_c0_g1_i8.path1	TRINITY_DN10575_c0_g2_i1.path1	novel.282
TRINITY_DN9519_c0_g1_i4.path1	novel.1260	novel.4450	TRINITY_DN14129_c0_g1_i5.path2	TRINITY_DN34220_c0_g2_i3.path1
novel.8460	novel.7766	novel.9817	novel.10055	Pepsico1_Contig8378.path2
novel.8718	TRINITY_DN20486_c0_g1_i4.path1	TRINITY_DN10288_c0_g1_i1.path2	TRINITY_DN11608_c2_g1_i1.path1	TRINITY_DN18991_c0_g2_i4.path1
TRINITY_DN32867_c0_g1_i1.path2	TRINITY_DN8132_c0_g1_i1.path1	TRINITY_DN9421_c0_g2_i6.path1	TRINITY_DN11478_c0_g1_i4.path1	TRINITY_DN64775_c0_g1_i1.path1
novel.1140	TRINITY_DN37160_c0_g1_i1.path1	novel.10258	TRINITY_DN18134_c0_g1_i2.path2	TRINITY_DN608_c3_g1_i1.path3
TRINITY_DN92594_c0_g1_i1.path1	Pepsico2_Contig13278.path1	TRINITY_DN5439_c0_g1_i1.path1	novel.4339	novel.10064
TRINITY_DN7118_c1_g2_i1.path1	TRINITY_DN75397_c0_g1_i1.path1	TRINITY_DN11548_c0_g1_i5.path1	TRINITY_DN10700_c0_g2_i1.path1	TRINITY_DN32602_c0_g1_i1.path2
TRINITY_DN9250_c0_g2_i2.path2	novel.8141	TRINITY_DN22129_c0_g4_i1.path2	novel.1355	Pepsico2_Contig14861.path1
TRINITY_DN36607_c0_g1_i1.path1	TRINITY_DN9696_c0_g1_i1.path1	TRINITY_DN7064_c1_g1_i4.path1	TRINITY_DN75642_c0_g1_i1.path1	novel.5942
Pepsico2_Contig17225.path2	TRINITY_DN11478_c0_g1_i4.path2	Pepsico2_Contig16540.path1	novel.6244	TRINITY_DN9600_c0_g1_i1.path1
TRINITY_DN13905_c0_g1_i1.path2	TRINITY_DN22833_c0_g3_i3.path1	Pepsico2_Contig12058.path1	novel.9820	TRINITY_DN11190_c5_g1_i1.path1
TRINITY_DN15612_c0_g1_i10.path3	novel.7790	novel.862	TRINITY_DN15878_c0_g1_i6.path1	TRINITY_DN97549_c0_g1_i1.path1
Pepsico2_Contig7749.path1	Pepsico2_Contig14796.path1	TRINITY_DN54033_c0_g2_i2.path2	novel.8697	TRINITY_DN18409_c0_g3_i1.path1
TRINITY_DN15215_c0_g1_i1.path2	Pepsico1_Contig1213.path1	novel.1348	TRINITY_DN5585_c0_g2_i1.path1	Pepsico2_Contig15428.path1
novel.356	TRINITY_DN4532_c0_g1_i4.path2	novel.10116	TRINITY_DN2755_c0_g2_i1.path2	TRINITY_DN26200_c0_g1_i1.path1
novel.3183	Pepsico1_Contig36346.path1	TRINITY_DN18924_c0_g1_i1.path1	novel.4967	novel.5367
TRINITY_DN98417_c0_g1_i1.path1	TRINITY_DN19933_c1_g5_i1.path1	TRINITY_DN19834_c0_g1_i3.path1	novel.3837	TRINITY_DN61383_c0_g1_i2.path1
novel.8875	Pepsico2_Contig12504.path1	TRINITY_DN12387_c0_g1_i1.path1	novel.10032	novel.2436
TRINITY_DN98402_c0_g1_i1.path1	TRINITY_DN8013_c0_g1_i1.path1	novel.5924	novel.8238	novel.4404
TRINITY_DN48093_c0_g1_i1.path2	TRINITY_DN78750_c0_g1_i1.path1	TRINITY_DN18185_c0_g1_i6.path1	TRINITY_DN5235_c1_g2_i1.path1	TRINITY_DN45363_c0_g1_i1.path2
TRINITY_DN8916_c1_g3_i1.path1	TRINITY_DN27295_c0_g1_i1.path1	novel.6104	TRINITY_DN34101_c0_g2_i1.path1	TRINITY_DN8771_c0_g1_i1.path1
TRINITY_DN22358_c0_g1_i2.path1	novel.7927	TRINITY_DN34261_c0_g1_i1.path1	TRINITY_DN49221_c0_g1_i1.path1	TRINITY_DN31614_c0_g1_i3.path1
TRINITY_DN41659_c0_g1_i1.path2	novel.6391	TRINITY_DN12571_c0_g1_i13.path1	novel.1916	TRINITY_DN52145_c0_g1_i1.path2
TRINITY_DN22426_c0_g1_i1.path1	TRINITY_DN14549_c0_g2_i3.path1	novel.2007	TRINITY_DN16685_c0_g1_i2.path2	TRINITY_DN42872_c0_g1_i1.path1
novel.2532	TRINITY_DN10288_c0_g1_i1.path2	novel.868	TRINITY_DN1212_c0_g1_i1.path1	novel.2699
novel.3090	TRINITY_DN24494_c0_g2_i1.path2	Pepsico2_Contig13889.path2	TRINITY_DN17877_c2_g1_i6.path1	TRINITY_DN31281_c0_g1_i2.path1
TRINITY_DN12571_c0_g1_i13.path1	TRINITY_DN90250_c0_g1_i1.path2	TRINITY_DN15668_c0_g2_i1.path1	TRINITY_DN29732_c0_g1_i1.path1	TRINITY_DN23584_c0_g1_i4.path2
TRINITY_DN15735_c0_g4_i1.path1	Pepsico2_Contig20774.path2	Pepsico2_Contig15659.path2	novel.7399	Pepsico1_Contig4169.path1
novel.4018	novel.8942	Pepsico2_Contig18606.path1	TRINITY_DN105250_c0_g1_i1.path1	TRINITY_DN11414_c1_g1_i1.path1
novel.8146	TRINITY_DN54476_c0_g1_i1.path1	TRINITY_DN10794_c1_g1_i3.path1	TRINITY_DN37171_c0_g1_i1.path1	novel.9406
novel.9016	novel.7743	Pepsico2_Contig9193.path1	novel.6333	TRINITY_DN38810_c0_g2_i2.path1
TRINITY_DN37419_c0_g1_i1.path1	TRINITY_DN2567_c0_g1_i1.path1	novel.3253	TRINITY_DN10334_c0_g1_i5.path1	novel.7462
novel.3187	novel.8292	TRINITY_DN8114_c0_g1_i6.path1	novel.8994	novel.979
Pepsico2_Contig8195.path2	novel.348	novel.1770	TRINITY_DN8596_c0_g7_i1.path1	Pepsico1_Contig3870.path2
novel.10201	novel.9751	TRINITY_DN7691_c1_g1_i3.path1	TRINITY_DN20793_c0_g1_i2.path1	novel.6094
novel.9021	novel.3655	TRINITY_DN7651_c0_g1_i4.path1	novel.7175	TRINITY_DN17069_c0_g1_i1.path1
Pepsico2_Contig11667.path1	TRINITY_DN5536_c1_g1_i4.path2	novel.1558	TRINITY_DN1734_c1_g1_i1.path1	TRINITY_DN7319_c0_g3_i1.path2
Pepsico1_Contig1404.path1	TRINITY_DN88632_c0_g1_i1.path1	TRINITY_DN99345_c0_g1_i1.path1	novel.6027	TRINITY_DN14623_c0_g1_i1.path1
novel.6262	TRINITY_DN45954_c0_g1_i1.path1	novel.4783	TRINITY_DN6932_c0_g1_i3.path1	Pepsico1_Contig244.path1
novel.3981	TRINITY_DN2755_c0_g2_i1.path2	novel.229	TRINITY_DN27062_c0_g1_i1.path1	novel.2800
novel.6103	TRINITY_DN12178_c0_g1_i2.path1	novel.8971	Pepsico2_Contig11843.path1	Pepsico1_Contig17817.path1
novel.6167	TRINITY_DN12224_c0_g1_i6.path2	TRINITY_DN44615_c1_g1_i1.path1	TRINITY_DN26560_c0_g2_i1.path2	TRINITY_DN54033_c0_g2_i2.path2
novel.6376	TRINITY_DN40411_c0_g1_i1.path1	novel.4272	TRINITY_DN22428_c1_g1_i2.path1	TRINITY_DN53070_c0_g1_i1.path1
TRINITY_DN41167_c0_g1_i3.path1	TRINITY_DN5970_c0_g2_i1.path2	Pepsico1_Contig3108.path2	novel.6045	TRINITY_DN4456_c0_g1_i1.path4
TRINITY_DN7357_c0_g2_i1.path1	TRINITY_DN34261_c0_g1_i1.path1	Pepsico2_Contig1209.path1	TRINITY_DN32537_c1_g1_i1.path1	TRINITY_DN12703_c0_g2_i1.path1
novel.8661	Pepsico2_Contig11466.path1	Pepsico2_Contig10852.path2	TRINITY_DN11668_c0_g1_i19.path1	novel.175
TRINITY_DN19696_c0_g1_i3.path1	Pepsico2_Contig20717.path1	TRINITY_DN7838_c0_g1_i2.path1	novel.2725	novel.2049
novel.6259	novel.455	Pepsico2_Contig426.path2	novel.620	TRINITY_DN11608_c2_g1_i1.path1
Pepsico1_Contig5630.path1	TRINITY_DN3106_c0_g2_i1.path1	Pepsico1_Contig2960.path1	novel.10023	TRINITY_DN77068_c0_g1_i1.path2
Pepsico2_Contig5526.path1	TRINITY_DN8094_c0_g1_i2.path1	TRINITY_DN26581_c0_g1_i1.path1	novel.10075	TRINITY_DN30055_c0_g1_i1.path1
TRINITY_DN13663_c1_g1_i1.path1	Pepsico1_Contig36039.path1	Pepsico1_Contig106.path1	TRINITY_DN29879_c0_g1_i4.path1	TRINITY_DN99345_c0_g1_i1.path1
TRINITY_DN27698_c0_g1_i1.path2	TRINITY_DN14129_c0_g1_i5.path3	Pepsico2_Contig19223.path1	novel.3655	TRINITY_DN18897_c2_g1_i1.path1
TRINITY_DN44006_c0_g1_i1.path2	TRINITY_DN16570_c0_g1_i4.path1	novel.7364	TRINITY_DN12386_c0_g2_i1.path1	TRINITY_DN24412_c0_g1_i5.path1
TRINITY_DN88372_c0_g1_i1.path3	Pepsico2_Contig2735.path1	TRINITY_DN12747_c0_g1_i1.path1	TRINITY_DN21802_c0_g2_i1.path1	TRINITY_DN70282_c0_g1_i1.path1
novel.7083	TRINITY_DN24150_c0_g2_i3.path2	novel.7743	TRINITY_DN4449_c0_g1_i3.path2	novel.1478
novel.2772	TRINITY_DN24094_c0_g1_i2.path1	TRINITY_DN1258_c0_g8_i1.path2	novel.4569	novel.6157
TRINITY_DN27316_c0_g1_i2.path1	TRINITY_DN25217_c0_g1_i1.path1	Pepsico2_Contig9211.path2	TRINITY_DN79513_c0_g1_i1.path1	TRINITY_DN109491_c0_g1_i1.path1
novel.4882	Pepsico2_Contig1223.path1	novel.9302	TRINITY_DN17371_c0_g1_i18.path3	novel.7840
Pepsico1_Contig4093.path1	Pepsico1_Contig865.path1	TRINITY_DN55073_c0_g1_i1.path1	novel.1690	Pepsico2_Contig11910.path1
novel.7147	TRINITY_DN7072_c5_g1_i2.path1	novel.10146	TRINITY_DN5970_c0_g2_i1.path2	novel.4051
TRINITY_DN18193_c0_g2_i1.path2	TRINITY_DN22229_c0_g2_i1.path1	novel.8181	TRINITY_DN7121_c0_g1_i8.path2	TRINITY_DN32584_c0_g1_i1.path1
TRINITY_DN6400_c0_g1_i1.path1	TRINITY_DN43549_c0_g1_i1.path2	TRINITY_DN18442_c0_g1_i1.path1	Pepsico1_Contig36238.path1	Pepsico2_Contig8286.path1
novel.6243	novel.2527	novel.10519	novel.1610	TRINITY_DN14213_c0_g1_i11.path1
novel.6606	TRINITY_DN31614_c0_g1_i3.path1	novel.8359	Pepsico2_Contig8853.path1	Pepsico2_Contig2154.path1
novel.5664	TRINITY_DN20136_c1_g1_i1.path1	TRINITY_DN16237_c0_g5_i1.path2	TRINITY_DN7964_c0_g1_i2.path1	TRINITY_DN102490_c0_g1_i1.path2
TRINITY_DN20875_c0_g1_i1.path2	TRINITY_DN11668_c0_g1_i19.path1	novel.8238	novel.6825	novel.1758
TRINITY_DN20500_c0_g3_i1.path1	TRINITY_DN76869_c0_g1_i1.path1	novel.10043	TRINITY_DN19684_c1_g1_i1.path1	TRINITY_DN22613_c0_g1_i2.path1
novel.8941	TRINITY_DN40802_c0_g3_i1.path2	TRINITY_DN16393_c0_g1_i1.path1	TRINITY_DN89960_c0_g1_i1.path1	novel.6131
novel.10504	TRINITY_DN12747_c0_g1_i1.path1	TRINITY_DN45102_c0_g1_i3.path1	Pepsico1_Contig25437.path1	novel.2886
novel.10064	TRINITY_DN25384_c0_g2_i1.path1	novel.6095	novel.6649	Pepsico2_Contig512.path1
Pepsico1_Contig32360.path1	TRINITY_DN66659_c0_g1_i1.path1	Pepsico2_Contig11466.path1	TRINITY_DN22129_c0_g4_i1.path2	TRINITY_DN19350_c0_g1_i2.path1
TRINITY_DN23702_c0_g1_i2.path1	TRINITY_DN22584_c0_g2_i1.path1	novel.7326	Pepsico2_Contig1158.path1	novel.9083
novel.2973	Pepsico2_Contig1491.path1	novel.8262	novel.2648	novel.4160
Pepsico2_Contig5409.path1	novel.5947	Pepsico2_Contig16877.path1	Pepsico2_Contig3027.path2	TRINITY_DN3857_c0_g2_i1.path2
novel.7746	TRINITY_DN5730_c0_g2_i2.path1	TRINITY_DN14667_c0_g2_i5.path2	TRINITY_DN1457_c0_g2_i3.path1	novel.6243
novel.9782	TRINITY_DN6942_c0_g1_i2.path1	novel.9847	novel.10057	novel.3393
novel.1107	TRINITY_DN24406_c0_g1_i1.path1	TRINITY_DN36403_c0_g4_i2.path1	novel.9475	TRINITY_DN89_c0_g1_i9.path1
TRINITY_DN43808_c0_g4_i1.path1	TRINITY_DN10860_c0_g1_i2.path1	Pepsico2_Contig11289.path2	TRINITY_DN4954_c0_g2_i1.path2	TRINITY_DN28071_c0_g1_i4.path1
TRINITY_DN4720_c0_g2_i2.path1	Pepsico2_Contig12590.path1	Pepsico2_Contig2978.path2	novel.9865	Pepsico2_Contig13278.path1
Pepsico1_Contig964.path1	TRINITY_DN74032_c0_g1_i1.path2	TRINITY_DN13917_c0_g1_i1.path1	novel.9510	novel.6115
TRINITY_DN34101_c0_g2_i1.path1	TRINITY_DN78221_c0_g1_i1.path1	TRINITY_DN8596_c0_g6_i2.path2	TRINITY_DN48806_c0_g1_i1.path2	TRINITY_DN1564_c1_g1_i2.path2
TRINITY_DN25501_c0_g1_i1.path1	TRINITY_DN16760_c0_g1_i1.path1	novel.6330	novel.4543	TRINITY_DN12408_c4_g1_i1.path1
TRINITY_DN11360_c0_g2_i1.path1	novel.10494	TRINITY_DN20875_c0_g1_i1.path2	novel.8387	novel.8064
TRINITY_DN33167_c0_g1_i2.path1	TRINITY_DN9079_c0_g1_i1.path1	novel.7299	TRINITY_DN4076_c0_g1_i5.path1	TRINITY_DN45570_c0_g1_i1.path1
TRINITY_DN34024_c0_g1_i1.path1	TRINITY_DN11877_c0_g2_i4.path1	Pepsico2_Contig14959.path1	novel.8971	TRINITY_DN20793_c0_g1_i2.path1
TRINITY_DN27406_c0_g1_i1.path2	Pepsico2_Contig779.path1	novel.5316	novel.7838	TRINITY_DN86956_c0_g1_i1.path1
novel.6076	TRINITY_DN12808_c0_g1_i3.path1	novel.7130	novel.5974	TRINITY_DN28393_c0_g1_i1.path1
novel.1537	novel.8056	novel.7746	TRINITY_DN25304_c0_g1_i2.path2	TRINITY_DN32929_c0_g1_i1.path1
novel.10344	novel.1363	novel.9475	novel.6201	TRINITY_DN7066_c0_g1_i2.path1
TRINITY_DN22405_c0_g2_i1.path2	novel.7294	Pepsico1_Contig216.path2	TRINITY_DN34220_c0_g2_i3.path1	Pepsico2_Contig11466.path1
TRINITY_DN14991_c1_g1_i1.path1	TRINITY_DN80029_c0_g1_i1.path1	TRINITY_DN22833_c0_g3_i3.path1	novel.9751	TRINITY_DN23219_c0_g5_i1.path1
Pepsico2_Contig5904.path1	novel.8099	TRINITY_DN49704_c0_g1_i1.path1	novel.5850	TRINITY_DN21826_c0_g1_i1.path1
novel.4038	TRINITY_DN53636_c0_g1_i1.path1	TRINITY_DN29879_c0_g1_i4.path1	novel.7300	TRINITY_DN10718_c0_g2_i1.path1
novel.3854	TRINITY_DN103453_c0_g1_i1.path1	novel.2494	TRINITY_DN11057_c0_g2_i1.path2	TRINITY_DN9734_c0_g2_i1.path1
novel.10061	TRINITY_DN13856_c2_g1_i1.path1	TRINITY_DN7983_c0_g1_i3.path2	TRINITY_DN19135_c0_g3_i1.path1	TRINITY_DN21860_c1_g1_i1.path1
TRINITY_DN15446_c0_g2_i1.path1	Pepsico2_Contig2160.path1	TRINITY_DN14386_c0_g1_i3.path1	Pepsico2_Contig14837.path1	novel.3009
TRINITY_DN10890_c0_g2_i1.path1	novel.10603	novel.2473	novel.10198	novel.4247
TRINITY_DN24412_c0_g1_i5.path1	TRINITY_DN27605_c0_g1_i2.path1	novel.5813	novel.6334	TRINITY_DN4973_c2_g1_i1.path1
Pepsico1_Contig3168.path3	novel.6058	Pepsico2_Contig17550.path2	TRINITY_DN16922_c0_g1_i1.path1	TRINITY_DN15198_c0_g3_i1.path1
novel.656	TRINITY_DN24796_c1_g2_i1.path3	TRINITY_DN30123_c0_g1_i1.path1	Pepsico1_Contig8052.path2	novel.9782
TRINITY_DN47146_c0_g1_i1.path2	novel.3169	Pepsico1_Contig2674.path1	novel.2527	novel.5855
TRINITY_DN12471_c0_g1_i1.path2	Pepsico2_Contig2387.path1	Pepsico1_Contig28824.path2	TRINITY_DN37834_c0_g4_i1.path1	Pepsico2_Contig20597.path2
Pepsico2_Contig16986.path2	novel.7206	TRINITY_DN20542_c1_g1_i1.path1	novel.6475	Pepsico1_Contig1451.path1
TRINITY_DN22824_c0_g1_i2.path1	TRINITY_DN14475_c0_g2_i3.path1	novel.348	TRINITY_DN13444_c0_g1_i1.path1	novel.6517
TRINITY_DN38190_c0_g1_i1.path2	TRINITY_DN8973_c0_g2_i2.path1	TRINITY_DN15838_c0_g1_i1.path1	novel.9565	TRINITY_DN37171_c0_g1_i1.path1
novel.8232	TRINITY_DN4538_c0_g1_i3.path2	Pepsico1_Contig3093.path1	novel.6921	TRINITY_DN31052_c0_g2_i1.path1
TRINITY_DN28498_c0_g1_i7.path1	TRINITY_DN10559_c0_g1_i12.path1	TRINITY_DN3582_c0_g1_i2.path2	TRINITY_DN23908_c0_g1_i2.path1	TRINITY_DN11234_c0_g1_i2.path1
TRINITY_DN33358_c0_g2_i1.path1	novel.8176	novel.625	TRINITY_DN14890_c1_g1_i1.path1	Pepsico2_Contig10698.path1
TRINITY_DN86693_c0_g1_i1.path1	novel.2863	TRINITY_DN25628_c0_g1_i1.path1	novel.1099	novel.6191
novel.5457	TRINITY_DN41708_c0_g2_i6.path1	TRINITY_DN16192_c0_g1_i1.path1	TRINITY_DN5911_c0_g1_i27.path1	novel.10498
TRINITY_DN30064_c0_g3_i2.path3	novel.1766	novel.8184	TRINITY_DN20293_c0_g1_i1.path1	TRINITY_DN63686_c0_g1_i1.path2
novel.4169	TRINITY_DN86093_c0_g1_i1.path1	Pepsico2_Contig14383.path1	TRINITY_DN23077_c0_g2_i1.path2	novel.2973
TRINITY_DN23584_c0_g1_i4.path2	TRINITY_DN18237_c1_g3_i1.path1	novel.1464	novel.148	Pepsico2_Contig12213.path2
novel.6339	Pepsico2_Contig14912.path1	Pepsico2_Contig16837.path1	novel.2730	TRINITY_DN18924_c0_g1_i1.path1
novel.4719	Pepsico1_Contig4661.path1	Pepsico2_Contig4966.path2	novel.8764	TRINITY_DN16393_c0_g1_i1.path1
TRINITY_DN41201_c0_g1_i1.path2	novel.4932	TRINITY_DN53472_c0_g1_i1.path1	TRINITY_DN65115_c0_g1_i1.path1	TRINITY_DN65_c0_g2_i1.path1
TRINITY_DN19565_c0_g1_i3.path1	novel.9354	novel.6199	TRINITY_DN3664_c0_g3_i1.path2	TRINITY_DN32541_c0_g1_i1.path1
TRINITY_DN7691_c0_g1_i1.path1	novel.7368	TRINITY_DN249_c1_g1_i1.path1	TRINITY_DN97436_c0_g1_i1.path1	novel.197
TRINITY_DN12806_c0_g1_i1.path1	novel.1690	novel.5220	TRINITY_DN14377_c0_g2_i1.path1	TRINITY_DN6578_c0_g1_i14.path3
TRINITY_DN21086_c0_g1_i1.path1	novel.5850	TRINITY_DN14064_c0_g1_i2.path1	TRINITY_DN43227_c1_g1_i2.path1	TRINITY_DN12256_c0_g1_i2.path2
TRINITY_DN46469_c0_g1_i1.path1	TRINITY_DN5246_c0_g1_i1.path2	Pepsico2_Contig16355.path1	TRINITY_DN57429_c0_g1_i1.path1	novel.5950
novel.4814	Pepsico1_Contig638.path1	Pepsico2_Contig13510.path1	TRINITY_DN13059_c0_g1_i13.path2	TRINITY_DN15969_c0_g1_i3.path1
Pepsico2_Contig18037.path1	TRINITY_DN12475_c1_g2_i5.path2	novel.2513	TRINITY_DN11183_c0_g2_i1.path2	TRINITY_DN80453_c0_g1_i1.path1
novel.360	TRINITY_DN23955_c0_g1_i1.path1	TRINITY_DN22358_c0_g1_i2.path1	Pepsico2_Contig11140.path1	novel.3797
Pepsico1_Contig1451.path1	novel.6104	TRINITY_DN7279_c0_g3_i1.path1	novel.4251	novel.4595
novel.8591	TRINITY_DN11731_c0_g3_i1.path1	TRINITY_DN9608_c0_g2_i2.path2	TRINITY_DN14211_c0_g1_i3.path1	novel.4437
TRINITY_DN16701_c0_g1_i2.path1	novel.215	Pepsico2_Contig7839.path1	novel.2496	TRINITY_DN103489_c0_g1_i1.path1
novel.6115	TRINITY_DN11349_c0_g1_i2.path2	TRINITY_DN36562_c0_g1_i1.path2	TRINITY_DN3565_c0_g2_i1.path1	novel.10052
TRINITY_DN20960_c0_g1_i1.path2	novel.1224	TRINITY_DN25195_c0_g1_i1.path1	TRINITY_DN32584_c0_g1_i1.path1	TRINITY_DN39169_c0_g1_i1.path1
Pepsico2_Contig19467.path2	TRINITY_DN8925_c0_g1_i1.path1	Pepsico2_Contig18303.path1	novel.6106	TRINITY_DN45843_c0_g1_i1.path2
novel.7515	TRINITY_DN8659_c0_g2_i1.path1	TRINITY_DN8283_c0_g1_i1.path1	TRINITY_DN50826_c0_g1_i13.path1	TRINITY_DN2091_c0_g2_i1.path2
Pepsico2_Contig1071.path1	novel.1205	novel.3180	TRINITY_DN14541_c0_g1_i1.path2	TRINITY_DN7824_c0_g1_i1.path2
TRINITY_DN26581_c0_g1_i1.path1	novel.4706	Pepsico2_Contig17047.path1	TRINITY_DN69304_c0_g1_i1.path1	TRINITY_DN11475_c0_g5_i1.path1
novel.3228	TRINITY_DN53024_c0_g1_i1.path2	TRINITY_DN11475_c0_g6_i1.path1	novel.6191	TRINITY_DN114213_c0_g1_i1.path1
novel.3815	TRINITY_DN34009_c0_g1_i1.path1	novel.3414	novel.8967	Pepsico2_Contig11832.path1
novel.1101	Pepsico2_Contig8540.path2	novel.4578	Pepsico2_Contig20617.path1	Pepsico2_Contig10736.path1
TRINITY_DN24786_c0_g1_i1.path2	TRINITY_DN13856_c2_g1_i1.path2	TRINITY_DN39189_c1_g1_i3.path1	novel.6059	TRINITY_DN23219_c0_g3_i3.path1
TRINITY_DN7205_c0_g1_i1.path3	TRINITY_DN71337_c0_g1_i1.path1	TRINITY_DN43075_c0_g1_i2.path2	novel.5550	TRINITY_DN50116_c0_g2_i1.path1
TRINITY_DN105250_c0_g1_i1.path1	novel.2881	novel.7485	TRINITY_DN1766_c0_g2_i2.path1	novel.1855
novel.4542	Pepsico2_Contig8093.path2	Pepsico1_Contig37885.path1	TRINITY_DN13190_c0_g1_i1.path1	TRINITY_DN15776_c0_g2_i1.path3
TRINITY_DN63358_c1_g1_i1.path1	TRINITY_DN91900_c0_g1_i1.path1	novel.972	TRINITY_DN87130_c0_g1_i1.path1	TRINITY_DN30892_c0_g1_i1.path1
TRINITY_DN3591_c0_g1_i2.path1	novel.9786	TRINITY_DN4027_c0_g5_i1.path2	novel.10349	TRINITY_DN44861_c0_g1_i1.path1
TRINITY_DN18237_c1_g3_i1.path1	novel.8204	TRINITY_DN16918_c0_g1_i7.path2	TRINITY_DN14427_c1_g1_i1.path1	novel.10525
novel.3394	novel.8591	TRINITY_DN21352_c0_g2_i1.path1	novel.6115	TRINITY_DN42523_c0_g1_i1.path2
Pepsico2_Contig4411.path1	TRINITY_DN17221_c0_g1_i5.path2	Pepsico2_Contig3417.path1	novel.8178	novel.375
TRINITY_DN1397_c0_g3_i1.path1	TRINITY_DN52375_c0_g1_i2.path1	TRINITY_DN8916_c1_g3_i1.path2	Pepsico2_Contig19697.path1	TRINITY_DN11880_c0_g1_i1.path3
TRINITY_DN111866_c0_g1_i1.path1	novel.2946	novel.4638	TRINITY_DN8399_c1_g2_i1.path1	TRINITY_DN80419_c0_g1_i1.path1
novel.9385	TRINITY_DN9421_c0_g1_i1.path1	Pepsico2_Contig15466.path2	TRINITY_DN12888_c1_g1_i3.path1	TRINITY_DN15354_c1_g2_i1.path1
TRINITY_DN9943_c1_g1_i1.path1	novel.6202	TRINITY_DN34473_c0_g1_i1.path3	TRINITY_DN13777_c0_g1_i4.path1	Pepsico2_Contig643.path2
Pepsico2_Contig20105.path1	TRINITY_DN10416_c0_g5_i1.path3	TRINITY_DN98062_c0_g1_i1.path1	novel.317	TRINITY_DN13491_c0_g1_i1.path4
TRINITY_DN44824_c0_g1_i1.path4	TRINITY_DN9899_c0_g1_i1.path1	TRINITY_DN588_c0_g2_i1.path1	TRINITY_DN44615_c1_g1_i1.path1	TRINITY_DN8315_c0_g1_i2.path2
TRINITY_DN32868_c0_g1_i1.path2	TRINITY_DN38367_c0_g1_i1.path1	TRINITY_DN20282_c0_g1_i3.path1	TRINITY_DN15668_c0_g3_i2.path1	Pepsico2_Contig8093.path2
novel.7697	novel.7345	novel.6932	Pepsico2_Contig14543.path2	Pepsico2_Contig6342.path2
TRINITY_DN35560_c0_g1_i1.path4	TRINITY_DN16742_c0_g2_i1.path1	TRINITY_DN32868_c0_g1_i1.path2	Pepsico2_Contig19255.path1	Pepsico1_Contig22880.path1
novel.2878	TRINITY_DN23337_c0_g1_i1.path1	TRINITY_DN90969_c0_g1_i1.path1	TRINITY_DN78535_c0_g1_i1.path1	novel.9245
novel.1349	novel.7904	novel.9233	novel.1093	TRINITY_DN29717_c0_g3_i1.path3
novel.5924	novel.10067	TRINITY_DN97391_c0_g1_i1.path1	TRINITY_DN31256_c0_g1_i1.path1	TRINITY_DN5091_c1_g2_i1.path1
TRINITY_DN33640_c0_g3_i1.path1	novel.3180	novel.1443	Pepsico2_Contig2978.path2	TRINITY_DN8639_c0_g2_i1.path5
TRINITY_DN13797_c1_g1_i1.path1	novel.3201	TRINITY_DN27643_c0_g1_i3.path2	TRINITY_DN5491_c1_g5_i1.path1	TRINITY_DN3394_c1_g2_i1.path1
Pepsico2_Contig5308.path1	novel.9736	novel.2140	TRINITY_DN9135_c0_g1_i1.path1	TRINITY_DN16257_c1_g1_i5.path2
novel.1750	novel.6932	TRINITY_DN43227_c1_g1_i2.path1	TRINITY_DN31143_c0_g1_i14.path1	TRINITY_DN6047_c1_g1_i1.path1
TRINITY_DN47298_c0_g3_i1.path1	TRINITY_DN13853_c0_g1_i1.path2	novel.10538	TRINITY_DN43074_c0_g1_i1.path1	novel.4023
TRINITY_DN26038_c0_g6_i1.path1	TRINITY_DN20282_c0_g1_i3.path1	novel.5224	novel.5884	TRINITY_DN39340_c0_g1_i2.path3
novel.3201	Pepsico2_Contig12871.path2	TRINITY_DN86693_c0_g1_i1.path1	TRINITY_DN6300_c0_g1_i3.path1	novel.2782
Pepsico2_Contig11017.path1	TRINITY_DN19018_c0_g1_i1.path1	novel.8207	novel.4214	TRINITY_DN13905_c0_g1_i1.path2
Pepsico1_Contig3350.path2	TRINITY_DN56964_c0_g2_i1.path2	TRINITY_DN22405_c0_g2_i1.path2	TRINITY_DN8198_c0_g1_i2.path1	TRINITY_DN11431_c0_g1_i1.path2
novel.4509	TRINITY_DN5821_c0_g1_i8.path2	TRINITY_DN19219_c0_g1_i1.path1	novel.375	TRINITY_DN9_c0_g1_i1.path1
TRINITY_DN31143_c0_g1_i14.path1	TRINITY_DN26078_c0_g1_i1.path1	TRINITY_DN79890_c0_g1_i1.path1	TRINITY_DN17128_c0_g1_i1.path1	novel.6036
TRINITY_DN9608_c0_g1_i4.path2	TRINITY_DN27818_c0_g1_i1.path2	TRINITY_DN13229_c0_g1_i1.path1	novel.7414	TRINITY_DN25394_c0_g1_i3.path1
TRINITY_DN65812_c0_g1_i1.path2	TRINITY_DN18442_c0_g1_i1.path1	Pepsico1_Contig4130.path1	TRINITY_DN89_c0_g1_i9.path1	TRINITY_DN18940_c0_g2_i1.path1
TRINITY_DN8978_c0_g1_i11.path1	TRINITY_DN11842_c0_g1_i1.path1	TRINITY_DN29865_c0_g1_i1.path1	TRINITY_DN36314_c0_g1_i1.path1	TRINITY_DN85720_c0_g1_i1.path3
TRINITY_DN24316_c0_g1_i3.path1	novel.6076	TRINITY_DN15762_c0_g2_i2.path1	novel.9027	Pepsico2_Contig17265.path1
TRINITY_DN10283_c0_g1_i4.path2	TRINITY_DN48907_c0_g1_i1.path2	TRINITY_DN42989_c1_g1_i1.path1	novel.3585	TRINITY_DN101486_c0_g1_i1.path2
novel.583	Pepsico2_Contig16933.path2	TRINITY_DN43845_c0_g1_i13.path1	TRINITY_DN21149_c0_g3_i1.path1	TRINITY_DN8008_c0_g2_i1.path1
novel.4528	novel.4846	TRINITY_DN35718_c0_g3_i2.path1	TRINITY_DN77564_c0_g1_i1.path1	Pepsico1_Contig32540.path1
TRINITY_DN9509_c0_g1_i4.path2	Pepsico2_Contig17067.path1	novel.1365	novel.8979	novel.2881
novel.6036	Pepsico2_Contig19574.path1	novel.1205	novel.1116	TRINITY_DN26834_c1_g1_i1.path1
novel.2921	novel.6729	TRINITY_DN18372_c0_g1_i1.path2	novel.10004	TRINITY_DN26672_c1_g2_i2.path1
TRINITY_DN52538_c0_g1_i1.path1	Pepsico2_Contig14557.path1	TRINITY_DN42306_c0_g1_i3.path2	Pepsico1_Contig34786.path2	TRINITY_DN6115_c1_g1_i2.path2
TRINITY_DN9971_c0_g1_i1.path1	TRINITY_DN9148_c0_g1_i1.path2	novel.6058	TRINITY_DN34912_c0_g1_i2.path1	novel.8592
TRINITY_DN27067_c1_g1_i1.path1	novel.1959	TRINITY_DN16456_c0_g2_i15.path2	Pepsico2_Contig20373.path1	novel.9394
TRINITY_DN1229_c0_g2_i1.path2	TRINITY_DN87_c0_g1_i1.path2	TRINITY_DN11147_c0_g2_i1.path1	novel.6157	Pepsico2_Contig2890.path1
TRINITY_DN2294_c1_g3_i1.path2	TRINITY_DN6405_c0_g1_i7.path2	TRINITY_DN12244_c1_g2_i1.path1	novel.3560	TRINITY_DN25826_c0_g2_i1.path1
novel.8184	TRINITY_DN18237_c1_g1_i2.path1	novel.3694	novel.7642	TRINITY_DN30477_c0_g1_i2.path1
TRINITY_DN56964_c0_g2_i1.path2	TRINITY_DN13217_c0_g1_i1.path3	TRINITY_DN7275_c0_g2_i2.path1	TRINITY_DN7279_c0_g3_i1.path1	novel.7474
novel.10297	novel.3408	TRINITY_DN12888_c1_g1_i3.path1	TRINITY_DN13490_c0_g1_i5.path1	TRINITY_DN37342_c0_g1_i1.path3
TRINITY_DN10990_c0_g2_i1.path2	Pepsico2_Contig13099.path1	novel.1481	novel.10510	Pepsico2_Contig14724.path4
TRINITY_DN12397_c0_g2_i1.path2	TRINITY_DN17358_c1_g3_i2.path1	novel.6134	novel.197	novel.10329
novel.3947	TRINITY_DN21352_c0_g2_i1.path1	TRINITY_DN62350_c0_g1_i1.path1	TRINITY_DN53070_c0_g1_i1.path2	Pepsico2_Contig10651.path1
novel.1074	TRINITY_DN1580_c0_g1_i4.path1	Pepsico1_Contig516.path1	TRINITY_DN26562_c0_g1_i1.path1	novel.4578
TRINITY_DN58518_c0_g2_i1.path1	TRINITY_DN4944_c0_g2_i1.path1	Pepsico1_Contig36152.path1	TRINITY_DN24094_c0_g1_i2.path1	TRINITY_DN15610_c0_g1_i1.path1
TRINITY_DN10668_c0_g1_i5.path1	novel.1390	TRINITY_DN98696_c0_g1_i1.path1	TRINITY_DN42903_c0_g1_i1.path2	novel.2441
TRINITY_DN1258_c0_g9_i1.path1	TRINITY_DN12396_c0_g1_i1.path1	TRINITY_DN63686_c0_g1_i1.path2	TRINITY_DN11927_c0_g1_i7.path1	TRINITY_DN26530_c1_g1_i1.path1
TRINITY_DN9129_c0_g1_i1.path2	TRINITY_DN16098_c0_g1_i3.path1	TRINITY_DN6909_c0_g1_i6.path2	novel.215	Pepsico1_Contig36060.path1
TRINITY_DN17687_c0_g2_i2.path1	TRINITY_DN36833_c1_g1_i1.path1	TRINITY_DN30361_c0_g1_i2.path1	novel.8916	TRINITY_DN18513_c0_g1_i1.path1
Pepsico2_Contig11017.path2	novel.4755	Pepsico2_Contig17130.path1	Pepsico2_Contig20717.path1	novel.9369
novel.7107	Pepsico1_Contig4399.path1	TRINITY_DN2294_c24_g1_i1.path4	novel.1150	Pepsico2_Contig1590.path1
novel.9720	novel.8184	TRINITY_DN16045_c1_g1_i4.path2	Pepsico2_Contig19542.path1	novel.8580
TRINITY_DN52817_c0_g1_i1.path1	novel.8299	TRINITY_DN109687_c0_g1_i1.path1	novel.10504	TRINITY_DN18977_c0_g1_i1.path1
TRINITY_DN8473_c0_g2_i2.path1	Pepsico2_Contig9071.path1	TRINITY_DN31249_c1_g3_i1.path1	TRINITY_DN22311_c0_g1_i7.path1	Pepsico1_Contig30037.path1
TRINITY_DN1195_c0_g5_i1.path2	novel.5653	TRINITY_DN10595_c0_g2_i2.path2	novel.6807	TRINITY_DN1146_c1_g1_i1.path1
Pepsico2_Contig10468.path1	TRINITY_DN9637_c0_g1_i4.path1	TRINITY_DN15449_c0_g1_i1.path1	novel.10325	novel.4451
TRINITY_DN11511_c0_g1_i2.path1	Pepsico2_Contig3356.path1	TRINITY_DN8636_c1_g1_i5.path2	TRINITY_DN3659_c2_g1_i1.path1	TRINITY_DN15648_c0_g1_i4.path1
TRINITY_DN8636_c1_g1_i5.path2	TRINITY_DN31490_c0_g2_i1.path1	novel.10162	novel.2885	TRINITY_DN9335_c0_g1_i7.path1
TRINITY_DN10654_c0_g3_i2.path1	novel.6323	TRINITY_DN18409_c0_g3_i1.path1	novel.4048	novel.3585
novel.7304	TRINITY_DN21074_c0_g1_i1.path1	TRINITY_DN61422_c1_g1_i1.path1	TRINITY_DN22391_c0_g1_i2.path1	TRINITY_DN22565_c0_g2_i2.path1
TRINITY_DN8096_c0_g1_i4.path1	TRINITY_DN31249_c1_g3_i1.path1	Pepsico1_Contig1872.path2	novel.9349	TRINITY_DN21218_c0_g2_i1.path2
TRINITY_DN7275_c0_g2_i2.path1	TRINITY_DN7651_c0_g1_i4.path1	novel.4462	TRINITY_DN20269_c0_g1_i2.path1	Pepsico2_Contig2036.path2
TRINITY_DN10241_c0_g2_i1.path1	novel.1892	TRINITY_DN8973_c0_g2_i2.path1	TRINITY_DN16237_c0_g3_i1.path2	TRINITY_DN588_c0_g2_i1.path1
TRINITY_DN40781_c0_g1_i1.path1	Pepsico2_Contig4899.path1	TRINITY_DN38601_c0_g1_i1.path1	novel.2979	novel.8466
novel.1770	Pepsico2_Contig640.path1	novel.9409	TRINITY_DN16237_c0_g1_i1.path1	TRINITY_DN18324_c0_g1_i1.path2
novel.8253	novel.2183	TRINITY_DN80213_c0_g1_i1.path1	TRINITY_DN52025_c0_g2_i1.path1	TRINITY_DN8779_c0_g2_i3.path2
TRINITY_DN5794_c0_g2_i5.path1	novel.3671	Pepsico1_Contig1213.path1	TRINITY_DN9426_c0_g1_i3.path1	novel.4969
novel.4163	novel.8730	TRINITY_DN7319_c0_g3_i1.path2	Pepsico2_Contig6342.path1	TRINITY_DN8978_c0_g1_i11.path1
TRINITY_DN23463_c1_g1_i1.path1	novel.5987	TRINITY_DN40802_c0_g3_i1.path2	TRINITY_DN12916_c0_g4_i1.path1	TRINITY_DN2417_c4_g1_i1.path1
Pepsico2_Contig15984.path1	Pepsico2_Contig752.path1	novel.6784	novel.10030	TRINITY_DN91302_c0_g1_i1.path1
TRINITY_DN56186_c0_g1_i1.path1	TRINITY_DN37782_c0_g2_i1.path1	Pepsico2_Contig4818.path1	novel.8831	TRINITY_DN16993_c1_g2_i2.path2
novel.4519	TRINITY_DN38763_c0_g1_i1.path1	TRINITY_DN14410_c0_g1_i1.path1	novel.7142	novel.4786
Pepsico2_Contig3417.path2	TRINITY_DN52679_c0_g1_i1.path2	TRINITY_DN108805_c0_g1_i1.path1	TRINITY_DN60842_c0_g4_i3.path1	novel.7658
Pepsico2_Contig16837.path1	TRINITY_DN113859_c0_g1_i1.path2	TRINITY_DN5198_c0_g2_i1.path1	novel.6228	TRINITY_DN5931_c0_g1_i7.path1
novel.10234	novel.3428	TRINITY_DN19933_c1_g5_i1.path1	TRINITY_DN16098_c0_g1_i3.path1	TRINITY_DN37834_c0_g4_i1.path1
TRINITY_DN63001_c0_g1_i1.path1	TRINITY_DN24254_c0_g1_i2.path1	Pepsico1_Contig25437.path1	TRINITY_DN106494_c0_g1_i1.path1	novel.6441
TRINITY_DN108749_c0_g1_i1.path1	novel.426	TRINITY_DN18284_c0_g1_i2.path1	Pepsico1_Contig5077.path1	TRINITY_DN7064_c1_g1_i4.path1
TRINITY_DN15838_c0_g1_i1.path1	novel.67	Pepsico1_Contig3132.path4	Pepsico1_Contig2876.path1	Pepsico2_Contig4727.path1
TRINITY_DN32537_c0_g1_i2.path2	TRINITY_DN105250_c0_g1_i1.path1	TRINITY_DN24832_c0_g3_i1.path1	novel.1891	novel.2689
Pepsico2_Contig9193.path1	TRINITY_DN13887_c0_g1_i1.path1	novel.10319	Pepsico2_Contig9973.path1	TRINITY_DN79890_c0_g1_i1.path2
TRINITY_DN12888_c1_g1_i3.path1	Pepsico1_Contig29617.path1	TRINITY_DN42792_c0_g4_i1.path1	Pepsico2_Contig17952.path2	TRINITY_DN51823_c0_g1_i1.path1
novel.3908	TRINITY_DN14943_c0_g1_i1.path1	TRINITY_DN35_c0_g2_i1.path1	novel.9808	Pepsico2_Contig21149.path1
TRINITY_DN6405_c0_g1_i7.path2	TRINITY_DN79503_c0_g1_i1.path1	Pepsico2_Contig10800.path2	novel.7165	novel.6122
Pepsico2_Contig11083.path1	Pepsico2_Contig10795.path1	TRINITY_DN11880_c0_g1_i1.path3	novel.6897	novel.946
novel.4585	novel.2742	TRINITY_DN26591_c0_g2_i3.path1	TRINITY_DN10556_c0_g1_i1.path1	TRINITY_DN32743_c0_g1_i1.path2
TRINITY_DN40665_c0_g2_i1.path1	novel.5209	TRINITY_DN22767_c0_g1_i1.path4	novel.6729	Pepsico2_Contig14938.path1
TRINITY_DN23596_c0_g1_i3.path1	Pepsico2_Contig5514.path1	Pepsico1_Contig1338.path2	novel.5257	TRINITY_DN55353_c0_g1_i2.path1
TRINITY_DN40653_c0_g1_i1.path1	novel.5248	TRINITY_DN28365_c0_g1_i3.path1	TRINITY_DN18327_c0_g4_i1.path1	TRINITY_DN30783_c0_g1_i6.path1
novel.8939	TRINITY_DN16918_c0_g1_i7.path2	TRINITY_DN4_c0_g1_i6.path1	novel.10153	Pepsico2_Contig5686.path1
TRINITY_DN14375_c0_g1_i3.path1	TRINITY_DN21086_c0_g1_i1.path1	novel.193	TRINITY_DN3073_c1_g1_i2.path1	novel.1538
TRINITY_DN7687_c0_g1_i2.path2	Pepsico2_Contig18201.path1	novel.8582	novel.1416	novel.8976
Pepsico2_Contig20617.path1	Pepsico2_Contig7855.path1	novel.4774	novel.10168	TRINITY_DN11234_c0_g3_i1.path1
novel.2139	TRINITY_DN25481_c0_g1_i1.path1	TRINITY_DN12913_c0_g3_i1.path1	novel.6932	novel.5885
novel.5156	novel.3513	novel.4720	TRINITY_DN24494_c0_g2_i1.path3	TRINITY_DN8670_c1_g1_i8.path2
novel.9786	Pepsico2_Contig11020.path2	TRINITY_DN19404_c0_g1_i1.path1	TRINITY_DN32159_c0_g1_i1.path1	TRINITY_DN8916_c1_g2_i1.path1
TRINITY_DN30929_c0_g1_i2.path1	novel.267	TRINITY_DN9975_c0_g2_i5.path1	TRINITY_DN17584_c0_g2_i6.path1	Pepsico2_Contig9474.path1
novel.9698	TRINITY_DN56381_c0_g1_i1.path1	Pepsico2_Contig14627.path1	novel.928	TRINITY_DN6181_c1_g1_i1.path1
Pepsico2_Contig5229.path1	Pepsico1_Contig1795.path1	novel.1667	novel.793	TRINITY_DN29528_c0_g1_i1.path1
TRINITY_DN14220_c0_g2_i6.path1	TRINITY_DN11360_c0_g2_i1.path1	Pepsico1_Contig51.path1	TRINITY_DN18442_c0_g1_i1.path1	TRINITY_DN34195_c0_g1_i2.path1
novel.7779	novel.8146	TRINITY_DN83410_c0_g1_i1.path1	novel.67	novel.10512
TRINITY_DN10664_c1_g6_i1.path2	TRINITY_DN3493_c0_g1_i3.path1	novel.4594	novel.7529	TRINITY_DN87787_c0_g1_i1.path1
TRINITY_DN1968_c0_g1_i4.path2	TRINITY_DN38440_c0_g1_i2.path1	TRINITY_DN14375_c0_g1_i3.path1	Pepsico1_Contig826.path1	Pepsico1_Contig24342.path2
Pepsico2_Contig7738.path2	TRINITY_DN14330_c0_g1_i1.path1	TRINITY_DN881_c0_g1_i4.path1	TRINITY_DN12952_c0_g5_i1.path2	TRINITY_DN16231_c0_g1_i2.path2
TRINITY_DN8893_c0_g1_i7.path1	novel.8504	TRINITY_DN13444_c0_g1_i1.path1	TRINITY_DN51625_c0_g1_i1.path1	novel.12
Pepsico2_Contig16525.path1	TRINITY_DN20837_c0_g1_i1.path2	Pepsico2_Contig7369.path1	Pepsico2_Contig14420.path1	TRINITY_DN10324_c0_g1_i2.path1
novel.5525	novel.35	novel.3196	TRINITY_DN10194_c2_g1_i1.path1	TRINITY_DN12502_c0_g5_i1.path1
novel.4583	TRINITY_DN9814_c1_g1_i2.path2	novel.1517	novel.9995	TRINITY_DN30795_c0_g1_i1.path1
Pepsico2_Contig15621.path1	TRINITY_DN32267_c0_g1_i1.path1	TRINITY_DN99651_c0_g1_i1.path2	TRINITY_DN25759_c0_g1_i1.path1	TRINITY_DN18193_c0_g2_i1.path2
TRINITY_DN97655_c0_g1_i1.path2	Pepsico2_Contig6624.path1	TRINITY_DN14481_c1_g2_i1.path1	novel.426	novel.8966
novel.4775	TRINITY_DN1229_c0_g2_i1.path2	TRINITY_DN8457_c0_g1_i1.path2	novel.4662	TRINITY_DN17687_c0_g2_i2.path1
TRINITY_DN111834_c0_g1_i1.path1	TRINITY_DN38216_c0_g1_i1.path1	TRINITY_DN64431_c0_g1_i3.path1	novel.7677	TRINITY_DN22453_c1_g3_i1.path2
novel.972	TRINITY_DN24494_c0_g2_i1.path3	novel.6523	TRINITY_DN28719_c0_g4_i1.path1	TRINITY_DN28038_c0_g1_i1.path1
TRINITY_DN86093_c0_g1_i1.path1	TRINITY_DN14972_c0_g1_i3.path2	TRINITY_DN32157_c1_g1_i2.path1	TRINITY_DN11307_c0_g2_i1.path1	TRINITY_DN3601_c0_g1_i1.path2
TRINITY_DN21332_c0_g2_i2.path2	TRINITY_DN14890_c1_g1_i1.path1	TRINITY_DN1212_c0_g1_i1.path1	TRINITY_DN18185_c0_g1_i6.path1	TRINITY_DN17256_c1_g2_i2.path1
TRINITY_DN11877_c0_g2_i4.path1	novel.4541	TRINITY_DN18688_c0_g3_i2.path1	TRINITY_DN108499_c0_g1_i1.path1	TRINITY_DN27316_c0_g1_i2.path1
TRINITY_DN17466_c0_g1_i1.path1	TRINITY_DN582_c1_g1_i4.path1	TRINITY_DN13142_c0_g1_i3.path1	TRINITY_DN61422_c1_g1_i1.path1	novel.2368
TRINITY_DN42306_c0_g1_i3.path2	TRINITY_DN3797_c0_g1_i2.path1	TRINITY_DN1446_c0_g1_i1.path2	TRINITY_DN13853_c0_g1_i1.path2	TRINITY_DN38876_c3_g1_i1.path1
TRINITY_DN9952_c0_g3_i1.path2	novel.4616	Pepsico2_Contig14494.path1	TRINITY_DN31252_c0_g1_i4.path2	TRINITY_DN66520_c0_g1_i1.path1
novel.7771	novel.8592	novel.10057	novel.5853	Pepsico2_Contig13308.path1
TRINITY_DN7406_c1_g1_i1.path1	TRINITY_DN47146_c0_g1_i1.path2	novel.1690	Pepsico2_Contig9541.path1	Pepsico1_Contig7942.path1
novel.5200	TRINITY_DN324_c0_g2_i1.path1	Pepsico2_Contig15761.path3	TRINITY_DN79961_c0_g1_i1.path1	TRINITY_DN114157_c0_g1_i1.path1
novel.4555	TRINITY_DN51163_c0_g1_i1.path1	TRINITY_DN24494_c0_g2_i1.path3	novel.625	TRINITY_DN10241_c0_g2_i1.path1
novel.5980	novel.63	novel.9875	novel.7437	TRINITY_DN46281_c0_g1_i1.path3
novel.3218	TRINITY_DN56964_c0_g1_i1.path1	novel.2092	TRINITY_DN15788_c0_g1_i1.path1	novel.5250
novel.7689	novel.10009	TRINITY_DN6662_c0_g1_i6.path1	TRINITY_DN35638_c0_g1_i4.path2	novel.1390
TRINITY_DN24796_c1_g2_i1.path3	Pepsico2_Contig6161.path1	TRINITY_DN23219_c0_g3_i3.path1	Pepsico1_Contig36306.path1	novel.9599
novel.1917	TRINITY_DN44751_c0_g1_i1.path1	TRINITY_DN18610_c0_g1_i2.path1	novel.23	TRINITY_DN23034_c0_g1_i1.path1
TRINITY_DN42370_c0_g1_i1.path1	TRINITY_DN5337_c0_g1_i4.path2	Pepsico2_Contig13035.path1	novel.4785	TRINITY_DN14439_c0_g2_i1.path1
TRINITY_DN56541_c0_g1_i1.path3	TRINITY_DN10595_c0_g2_i2.path2	Pepsico1_Contig36309.path1	novel.7294	TRINITY_DN7127_c0_g1_i1.path1
TRINITY_DN25378_c0_g1_i1.path1	TRINITY_DN5109_c0_g1_i2.path1	Pepsico1_Contig33634.path1	TRINITY_DN21553_c0_g1_i5.path4	TRINITY_DN33848_c0_g1_i2.path2
TRINITY_DN34544_c0_g1_i2.path1	TRINITY_DN41090_c0_g1_i2.path2	TRINITY_DN7934_c2_g5_i1.path1	novel.1837	novel.4783
Pepsico1_Contig725.path1	novel.5390	Pepsico2_Contig14999.path1	novel.9384	Pepsico1_Contig3775.path1
TRINITY_DN30194_c0_g1_i5.path1	TRINITY_DN1462_c0_g4_i1.path1	novel.3765	novel.1177	TRINITY_DN10806_c1_g2_i8.path2
TRINITY_DN45534_c0_g1_i1.path2	TRINITY_DN18442_c1_g1_i2.path2	TRINITY_DN16237_c0_g1_i1.path1	novel.9409	TRINITY_DN4640_c1_g2_i1.path2
TRINITY_DN8318_c0_g1_i3.path3	TRINITY_DN452_c0_g1_i2.path1	novel.9920	novel.7485	novel.1384
TRINITY_DN11195_c1_g1_i1.path2	novel.1093	novel.8099	TRINITY_DN26562_c0_g2_i1.path1	TRINITY_DN19482_c0_g2_i1.path1
TRINITY_DN48874_c0_g1_i2.path3	novel.868	novel.215	novel.7299	TRINITY_DN29405_c0_g1_i1.path1
TRINITY_DN65545_c0_g1_i1.path1	TRINITY_DN10837_c0_g1_i1.path1	TRINITY_DN13542_c0_g1_i1.path2	novel.2973	Pepsico2_Contig9211.path2
TRINITY_DN15354_c1_g2_i1.path1	novel.5683	TRINITY_DN26039_c0_g1_i1.path1	TRINITY_DN9265_c0_g2_i1.path1	novel.10137
novel.9860	novel.7703	TRINITY_DN17319_c0_g1_i7.path1	TRINITY_DN11360_c0_g1_i1.path1	Pepsico1_Contig4382.path1
Pepsico2_Contig37.path1	TRINITY_DN19259_c1_g1_i1.path1	novel.282	TRINITY_DN26591_c0_g1_i1.path1	TRINITY_DN9693_c0_g1_i7.path1
Pepsico1_Contig33771.path1	Pepsico2_Contig13783.path2	novel.10624	Pepsico2_Contig9315.path5	TRINITY_DN6605_c1_g1_i5.path2
TRINITY_DN15963_c0_g1_i2.path2	TRINITY_DN3429_c1_g1_i2.path1	novel.5935	novel.2511	novel.3808
TRINITY_DN12929_c1_g1_i1.path1	Pepsico1_Contig52.path2	TRINITY_DN74_c0_g2_i1.path1	novel.4244	novel.1477
TRINITY_DN4944_c0_g2_i1.path1	TRINITY_DN8283_c0_g1_i1.path1	TRINITY_DN10605_c0_g1_i2.path1	TRINITY_DN24742_c0_g3_i1.path2	TRINITY_DN5662_c0_g1_i3.path1
TRINITY_DN13333_c2_g1_i2.path1	TRINITY_DN32096_c0_g1_i1.path1	Pepsico1_Contig5029.path1	TRINITY_DN34473_c0_g1_i1.path3	TRINITY_DN107989_c0_g1_i1.path1
novel.4284	Pepsico2_Contig9211.path2	novel.4214	Pepsico1_Contig4585.path1	Pepsico2_Contig7702.path1
TRINITY_DN27458_c0_g1_i3.path1	Pepsico2_Contig1309.path1	novel.2757	TRINITY_DN73847_c0_g1_i1.path1	novel.2898
TRINITY_DN10226_c0_g1_i1.path1	TRINITY_DN1258_c0_g8_i1.path1	Pepsico2_Contig1790.path2	novel.9840	novel.8690
Pepsico2_Contig17986.path1	novel.6105	Pepsico2_Contig15227.path1	novel.10146	Pepsico2_Contig5262.path2
TRINITY_DN9600_c0_g1_i1.path1	novel.5147	novel.4709	TRINITY_DN25501_c0_g1_i1.path1	TRINITY_DN24307_c0_g1_i1.path1
TRINITY_DN9370_c0_g2_i1.path1	novel.2138	TRINITY_DN110160_c0_g1_i1.path1	Pepsico2_Contig16832.path1	TRINITY_DN65812_c0_g1_i1.path2
TRINITY_DN19110_c0_g3_i1.path1	TRINITY_DN10605_c0_g1_i2.path1	TRINITY_DN12488_c0_g1_i5.path1	novel.1410	TRINITY_DN49160_c0_g3_i1.path2
TRINITY_DN29289_c0_g1_i1.path1	novel.4787	TRINITY_DN52779_c0_g1_i1.path1	TRINITY_DN27841_c0_g1_i1.path1	Pepsico1_Contig2723.path1
TRINITY_DN29879_c0_g1_i4.path1	TRINITY_DN16237_c0_g1_i1.path1	Pepsico1_Contig3168.path3	TRINITY_DN11731_c0_g3_i1.path1	TRINITY_DN50492_c0_g2_i1.path2
TRINITY_DN82273_c0_g1_i1.path1	novel.8936	novel.7423	novel.7884	novel.2984
novel.9406	TRINITY_DN29283_c0_g1_i1.path2	TRINITY_DN32251_c0_g1_i1.path1	Pepsico1_Contig3168.path3	TRINITY_DN383_c1_g2_i1.path1
Pepsico2_Contig5745.path1	novel.10075	novel.9674	TRINITY_DN115818_c0_g1_i1.path1	novel.661
novel.6272	novel.2500	TRINITY_DN20418_c0_g1_i1.path1	TRINITY_DN15712_c0_g1_i2.path1	novel.148
novel.4272	novel.9995	novel.5845	TRINITY_DN42581_c0_g1_i1.path1	TRINITY_DN25978_c0_g3_i1.path2
novel.9838	TRINITY_DN16397_c0_g1_i4.path3	TRINITY_DN79890_c0_g1_i1.path2	TRINITY_DN99636_c0_g1_i1.path1	TRINITY_DN67089_c0_g1_i1.path2
TRINITY_DN14240_c0_g1_i1.path2	TRINITY_DN47982_c0_g1_i1.path1	novel.8292	Pepsico1_Contig2504.path1	novel.8619
novel.1397	TRINITY_DN97391_c0_g1_i1.path1	TRINITY_DN68988_c0_g1_i1.path2	Pepsico2_Contig3137.path1	novel.9321
TRINITY_DN20136_c1_g1_i1.path3	novel.1513	TRINITY_DN44459_c0_g1_i1.path1	TRINITY_DN27399_c2_g1_i1.path1	TRINITY_DN57243_c0_g1_i1.path3
TRINITY_DN2800_c1_g1_i1.path5	Pepsico2_Contig17563.path2	Pepsico2_Contig11140.path1	TRINITY_DN1083_c3_g1_i3.path2	TRINITY_DN35103_c2_g1_i1.path1
TRINITY_DN24191_c0_g1_i2.path1	novel.6965	novel.8966	novel.2863	TRINITY_DN16062_c0_g1_i1.path1
TRINITY_DN91_c0_g1_i1.path2	Pepsico2_Contig2961.path1	Pepsico2_Contig1721.path1	Pepsico2_Contig8540.path2	Pepsico2_Contig9596.path1
Pepsico2_Contig12764.path1	TRINITY_DN4289_c0_g2_i1.path2	TRINITY_DN4663_c1_g2_i1.path1	novel.6093	TRINITY_DN12748_c0_g1_i2.path1
novel.1046	TRINITY_DN102464_c0_g1_i1.path2	novel.6793	novel.8746	TRINITY_DN8652_c0_g1_i6.path1
TRINITY_DN2451_c0_g1_i3.path1	Pepsico2_Contig5179.path1	TRINITY_DN115818_c0_g1_i1.path1	novel.10551	TRINITY_DN7176_c0_g2_i4.path1
TRINITY_DN10664_c1_g6_i1.path3	TRINITY_DN64431_c0_g1_i3.path1	TRINITY_DN8174_c0_g1_i4.path1	Pepsico2_Contig16621.path1	TRINITY_DN18327_c0_g4_i1.path3
TRINITY_DN8973_c0_g2_i2.path1	TRINITY_DN32690_c0_g2_i1.path1	TRINITY_DN71027_c0_g1_i1.path1	novel.293	Pepsico2_Contig2590.path1
Pepsico2_Contig12859.path1	TRINITY_DN38190_c0_g1_i1.path2	TRINITY_DN7897_c2_g1_i3.path1	TRINITY_DN2354_c0_g1_i4.path2	TRINITY_DN8471_c0_g3_i1.path1
TRINITY_DN5258_c0_g1_i20.path1	TRINITY_DN7897_c2_g1_i3.path1	TRINITY_DN4076_c0_g1_i5.path1	Pepsico2_Contig11484.path2	novel.5110
novel.4569	TRINITY_DN56070_c0_g1_i1.path1	novel.2725	TRINITY_DN17278_c1_g1_i1.path1	TRINITY_DN98076_c0_g1_i1.path1
TRINITY_DN7772_c0_g2_i1.path2	novel.972	Pepsico2_Contig18136.path1	novel.4517	TRINITY_DN14036_c1_g1_i3.path2
TRINITY_DN8471_c0_g3_i1.path1	novel.4474	TRINITY_DN26026_c0_g1_i4.path1	novel.356	Pepsico1_Contig31535.path2
TRINITY_DN29983_c0_g1_i2.path1	TRINITY_DN21185_c0_g1_i1.path2	TRINITY_DN11877_c0_g2_i4.path1	TRINITY_DN1564_c1_g1_i2.path1	TRINITY_DN21624_c0_g1_i1.path1
TRINITY_DN13938_c0_g1_i2.path1	TRINITY_DN11187_c0_g1_i1.path1	novel.9185	TRINITY_DN15509_c2_g1_i1.path2	TRINITY_DN8070_c0_g1_i2.path1
TRINITY_DN57429_c0_g1_i1.path1	novel.3956	novel.9815	TRINITY_DN6979_c0_g1_i6.path1	TRINITY_DN19890_c0_g1_i4.path1
novel.8052	TRINITY_DN6829_c1_g1_i1.path1	novel.10344	novel.5064	TRINITY_DN37359_c0_g1_i1.path3
Pepsico2_Contig2408.path3	TRINITY_DN33691_c0_g1_i1.path1	Pepsico2_Contig2033.path1	novel.7633	TRINITY_DN21900_c0_g1_i2.path1
novel.7463	novel.3981	novel.2469	TRINITY_DN3939_c0_g2_i1.path2	novel.7142
TRINITY_DN16062_c0_g1_i1.path1	TRINITY_DN53472_c0_g1_i1.path1	novel.6079	TRINITY_DN54033_c0_g2_i2.path2	novel.7099
TRINITY_DN13954_c0_g1_i1.path1	novel.4161	Pepsico2_Contig7656.path1	novel.10160	Pepsico1_Contig32245.path1
TRINITY_DN24835_c0_g4_i1.path1	Pepsico2_Contig18214.path1	novel.3217	TRINITY_DN48193_c0_g1_i1.path1	novel.10200
novel.9610	TRINITY_DN233_c0_g2_i1.path1	TRINITY_DN9920_c0_g1_i11.path1	Pepsico1_Contig5854.path2	Pepsico2_Contig2113.path1
TRINITY_DN78930_c0_g1_i1.path1	TRINITY_DN45181_c0_g1_i2.path1	Pepsico1_Contig38400.path1	Pepsico1_Contig3556.path1	TRINITY_DN15735_c0_g4_i1.path1
TRINITY_DN12193_c0_g2_i1.path1	TRINITY_DN3394_c1_g2_i1.path1	Pepsico1_Contig2034.path2	novel.6586	TRINITY_DN14240_c0_g1_i1.path2
novel.7791	novel.8125	TRINITY_DN19851_c0_g1_i1.path1	TRINITY_DN11853_c0_g1_i6.path2	Pepsico2_Contig14654.path1
TRINITY_DN9056_c1_g1_i1.path1	Pepsico1_Contig5249.path1	Pepsico1_Contig1331.path2	novel.4761	novel.5849
Pepsico1_Contig1764.path1	Pepsico1_Contig22407.path1	TRINITY_DN1457_c0_g2_i3.path1	novel.4279	novel.4026
novel.35	Pepsico2_Contig6151.path2	TRINITY_DN6007_c0_g1_i6.path2	TRINITY_DN21483_c0_g2_i3.path1	TRINITY_DN30123_c0_g1_i1.path1
Pepsico1_Contig36309.path1	TRINITY_DN4502_c2_g1_i1.path1	TRINITY_DN65319_c0_g1_i1.path1	novel.10112	novel.2652
TRINITY_DN233_c0_g2_i1.path1	TRINITY_DN21288_c0_g2_i2.path1	TRINITY_DN8916_c1_g2_i1.path2	TRINITY_DN22363_c1_g1_i2.path1	novel.7553
novel.10124	TRINITY_DN8596_c0_g6_i2.path2	TRINITY_DN104848_c0_g1_i1.path3	TRINITY_DN18284_c0_g1_i2.path1	TRINITY_DN9373_c0_g1_i6.path1
TRINITY_DN42989_c1_g1_i1.path1	TRINITY_DN16277_c0_g1_i4.path1	TRINITY_DN8756_c10_g1_i1.path1	novel.1905	novel.7725
TRINITY_DN11187_c0_g1_i1.path1	TRINITY_DN77785_c0_g1_i1.path2	TRINITY_DN26947_c0_g1_i2.path1	novel.210	TRINITY_DN27671_c0_g1_i2.path1
TRINITY_DN7472_c0_g3_i1.path1	novel.6260	TRINITY_DN34297_c0_g1_i3.path1	Pepsico2_Contig14015.path1	TRINITY_DN39682_c0_g2_i2.path1
novel.1479	TRINITY_DN11367_c0_g1_i3.path1	TRINITY_DN26562_c0_g2_i1.path1	TRINITY_DN56751_c0_g3_i1.path1	TRINITY_DN23067_c0_g1_i1.path1
TRINITY_DN20282_c0_g1_i3.path1	Pepsico2_Contig18206.path2	novel.7904	novel.2676	TRINITY_DN11773_c0_g2_i1.path2
novel.7150	TRINITY_DN9426_c0_g1_i3.path1	TRINITY_DN32457_c0_g1_i1.path2	TRINITY_DN10621_c0_g1_i7.path1	Pepsico1_Contig1809.path1
novel.9281	novel.3480	novel.1615	TRINITY_DN8596_c4_g1_i1.path1	novel.8746
novel.1120	novel.9858	TRINITY_DN45954_c0_g1_i1.path1	TRINITY_DN18634_c0_g1_i6.path1	TRINITY_DN11357_c0_g1_i1.path1
TRINITY_DN14132_c0_g2_i2.path1	TRINITY_DN13294_c1_g1_i1.path1	TRINITY_DN15885_c0_g1_i1.path1	Pepsico1_Contig340.path2	TRINITY_DN10416_c0_g3_i1.path1
Pepsico1_Contig32400.path1	TRINITY_DN24742_c0_g3_i1.path2	TRINITY_DN88746_c0_g1_i1.path1	TRINITY_DN26343_c0_g2_i1.path2	TRINITY_DN17980_c0_g1_i4.path1
Pepsico1_Contig33288.path1	novel.3002	novel.1919	Pepsico1_Contig7022.path1	Pepsico1_Contig14274.path2
TRINITY_DN10342_c1_g1_i1.path1	novel.4169	TRINITY_DN23832_c0_g1_i1.path1	TRINITY_DN42872_c0_g1_i1.path1	TRINITY_DN41072_c0_g1_i1.path1
TRINITY_DN11190_c5_g1_i1.path1	novel.10551	Pepsico2_Contig16881.path1	novel.7469	TRINITY_DN12913_c0_g2_i1.path1
TRINITY_DN79972_c0_g1_i1.path1	TRINITY_DN7199_c0_g4_i2.path1	novel.10068	TRINITY_DN30714_c0_g1_i2.path1	novel.6182
TRINITY_DN10572_c0_g2_i1.path1	novel.8188	Pepsico2_Contig4524.path2	TRINITY_DN14202_c3_g1_i1.path1	TRINITY_DN25759_c0_g1_i1.path1
novel.259	novel.8130	Pepsico1_Contig982.path1	Pepsico1_Contig1695.path1	novel.5480
TRINITY_DN8138_c1_g1_i1.path1	TRINITY_DN25195_c0_g1_i1.path1	Pepsico2_Contig5798.path1	TRINITY_DN10686_c1_g1_i1.path1	novel.2345
Pepsico2_Contig1434.path1	Pepsico1_Contig37308.path1	TRINITY_DN13887_c0_g1_i1.path1	Pepsico2_Contig5745.path1	Pepsico2_Contig19478.path1
TRINITY_DN90969_c0_g1_i1.path1	TRINITY_DN77068_c0_g1_i1.path2	TRINITY_DN30446_c0_g1_i1.path2	TRINITY_DN28469_c0_g1_i4.path1	TRINITY_DN21432_c0_g2_i1.path1
TRINITY_DN32267_c0_g1_i1.path1	TRINITY_DN25015_c0_g1_i1.path1	novel.4507	TRINITY_DN11880_c0_g1_i1.path3	novel.1409
TRINITY_DN3104_c1_g2_i1.path1	novel.1709	Pepsico2_Contig18169.path2	TRINITY_DN9608_c0_g1_i4.path2	novel.1517
novel.314	TRINITY_DN14014_c0_g3_i1.path1	TRINITY_DN31787_c0_g1_i2.path1	TRINITY_DN869_c0_g1_i1.path2	TRINITY_DN276_c1_g1_i1.path1
Pepsico2_Contig8600.path1	Pepsico2_Contig12616.path1	novel.6076	Pepsico2_Contig16449.path1	TRINITY_DN18098_c0_g1_i1.path2
Pepsico2_Contig16992.path1	TRINITY_DN10164_c0_g1_i10.path1	novel.6652	novel.9971	novel.6715
Pepsico1_Contig26224.path2	TRINITY_DN105904_c0_g1_i1.path3	Pepsico1_Contig6738.path1	Pepsico2_Contig18251.path1	TRINITY_DN828_c3_g1_i1.path2
TRINITY_DN31290_c1_g1_i1.path1	Pepsico2_Contig11843.path1	novel.4335	novel.6512	TRINITY_DN16237_c0_g5_i1.path2
TRINITY_DN10252_c0_g1_i3.path2	TRINITY_DN25572_c0_g1_i1.path2	TRINITY_DN34009_c0_g1_i1.path1	TRINITY_DN11475_c0_g5_i1.path1	TRINITY_DN107476_c0_g1_i1.path1
TRINITY_DN107810_c0_g1_i1.path2	TRINITY_DN33572_c0_g2_i1.path2	TRINITY_DN14167_c0_g1_i1.path1	TRINITY_DN12396_c0_g1_i1.path1	TRINITY_DN10891_c1_g1_i1.path1
TRINITY_DN33707_c0_g1_i5.path1	TRINITY_DN65545_c0_g1_i1.path1	Pepsico2_Contig204.path2	TRINITY_DN19174_c0_g1_i1.path1	TRINITY_DN91900_c0_g1_i1.path1
TRINITY_DN33835_c0_g1_i1.path1	Pepsico2_Contig3578.path2	novel.4161	TRINITY_DN25195_c0_g1_i1.path1	TRINITY_DN17834_c0_g1_i1.path1
TRINITY_DN47844_c0_g1_i1.path1	novel.2772	TRINITY_DN582_c2_g1_i6.path1	TRINITY_DN10891_c1_g1_i1.path1	TRINITY_DN11877_c0_g2_i4.path1
novel.7955	TRINITY_DN32584_c0_g1_i1.path1	TRINITY_DN9335_c0_g1_i7.path2	TRINITY_DN11562_c0_g1_i1.path1	TRINITY_DN40112_c0_g1_i1.path1
TRINITY_DN40534_c0_g1_i1.path1	novel.1616	Pepsico2_Contig2408.path3	novel.87	novel.4705
TRINITY_DN30_c3_g1_i1.path1	TRINITY_DN7448_c0_g1_i5.path1	TRINITY_DN2755_c0_g2_i1.path1	novel.9371	novel.8663
TRINITY_DN10190_c0_g1_i5.path1	novel.8714	novel.8714	novel.8981	TRINITY_DN100023_c0_g1_i1.path2
novel.7475	novel.7462	novel.7425	Pepsico2_Contig8195.path2	Pepsico1_Contig1632.path2
TRINITY_DN50072_c0_g1_i1.path1	TRINITY_DN70567_c0_g1_i1.path1	Pepsico2_Contig1298.path1	TRINITY_DN18897_c2_g1_i1.path1	TRINITY_DN12927_c0_g2_i1.path1
Pepsico1_Contig847.path1	novel.8232	TRINITY_DN61294_c0_g1_i1.path3	novel.6255	novel.3180
novel.4851	novel.1103	novel.3596	novel.5524	novel.9053
Pepsico1_Contig2831.path1	novel.10307	TRINITY_DN5337_c0_g1_i4.path2	Pepsico2_Contig2365.path1	TRINITY_DN431_c0_g1_i7.path1
novel.8682	TRINITY_DN2294_c24_g1_i1.path3	TRINITY_DN19194_c0_g1_i2.path1	TRINITY_DN18324_c0_g1_i1.path2	novel.10542
novel.1445	TRINITY_DN18814_c0_g1_i4.path1	TRINITY_DN13467_c0_g1_i2.path2	TRINITY_DN24254_c0_g1_i2.path1	TRINITY_DN15904_c0_g1_i9.path1
novel.1344	TRINITY_DN40781_c0_g1_i1.path1	novel.4464	TRINITY_DN54399_c0_g1_i1.path2	TRINITY_DN40642_c0_g1_i1.path3
TRINITY_DN37171_c0_g1_i1.path1	TRINITY_DN18897_c2_g1_i1.path1	novel.6536	TRINITY_DN5198_c0_g2_i1.path1	TRINITY_DN42581_c0_g1_i1.path1
TRINITY_DN45155_c0_g1_i1.path2	TRINITY_DN50536_c0_g1_i2.path1	TRINITY_DN8659_c0_g2_i1.path1	novel.6079	Pepsico2_Contig20541.path1
TRINITY_DN24742_c0_g3_i1.path2	TRINITY_DN57575_c0_g1_i2.path2	novel.4343	TRINITY_DN101519_c0_g1_i1.path1	TRINITY_DN26458_c0_g1_i1.path1
Pepsico2_Contig10491.path1	TRINITY_DN2354_c0_g1_i4.path2	Pepsico1_Contig5522.path4	novel.836	TRINITY_DN4785_c0_g1_i7.path2
TRINITY_DN21706_c0_g1_i3.path1	novel.7218	TRINITY_DN16672_c0_g2_i1.path1	novel.7425	Pepsico2_Contig10750.path2
novel.1245	novel.2807	Pepsico2_Contig20459.path2	TRINITY_DN19135_c0_g1_i1.path1	TRINITY_DN91494_c0_g1_i1.path1
TRINITY_DN59863_c0_g1_i1.path1	TRINITY_DN65319_c0_g1_i1.path1	TRINITY_DN19110_c0_g3_i1.path1	TRINITY_DN45898_c0_g1_i3.path3	TRINITY_DN10382_c0_g1_i3.path2
TRINITY_DN30361_c0_g1_i2.path1	TRINITY_DN10372_c0_g2_i1.path1	TRINITY_DN15850_c0_g1_i2.path1	TRINITY_DN9653_c0_g2_i1.path1	TRINITY_DN28700_c0_g4_i1.path1
Pepsico2_Contig12997.path1	novel.1445	TRINITY_DN6877_c0_g1_i1.path1	TRINITY_DN12171_c0_g1_i7.path2	novel.6753
Pepsico2_Contig11020.path2	Pepsico1_Contig37736.path1	Pepsico2_Contig18212.path1	novel.567	novel.10207
TRINITY_DN684_c1_g1_i1.path1	novel.7149	novel.1226	Pepsico2_Contig12543.path1	novel.5598
TRINITY_DN29796_c0_g1_i1.path1	TRINITY_DN74622_c0_g1_i1.path1	TRINITY_DN12224_c0_g1_i6.path2	TRINITY_DN102479_c0_g1_i1.path1	novel.7158
Pepsico1_Contig37404.path1	Pepsico2_Contig15659.path2	TRINITY_DN55971_c0_g1_i1.path1	TRINITY_DN29528_c0_g1_i1.path1	TRINITY_DN23475_c0_g1_i5.path2
TRINITY_DN26906_c0_g1_i7.path1	novel.5071	Pepsico2_Contig2456.path5	TRINITY_DN21382_c1_g1_i1.path1	TRINITY_DN49471_c0_g1_i1.path1
TRINITY_DN7127_c0_g2_i6.path2	TRINITY_DN8636_c1_g1_i5.path2	TRINITY_DN53169_c0_g1_i1.path1	TRINITY_DN23841_c0_g1_i1.path1	TRINITY_DN12664_c0_g1_i3.path2
Pepsico2_Contig20774.path2	TRINITY_DN26038_c0_g6_i1.path1	novel.4283	TRINITY_DN62350_c0_g1_i1.path1	TRINITY_DN7964_c0_g1_i2.path1
TRINITY_DN22879_c0_g1_i2.path1	Pepsico2_Contig13697.path1	novel.7703	TRINITY_DN26115_c0_g2_i3.path1	TRINITY_DN72273_c0_g1_i1.path1
TRINITY_DN30268_c0_g5_i1.path1	Pepsico1_Contig1433.path1	novel.6103	TRINITY_DN9920_c0_g1_i11.path1	TRINITY_DN23337_c0_g1_i1.path2
novel.1892	novel.3394	TRINITY_DN5562_c0_g1_i5.path1	TRINITY_DN1502_c0_g4_i1.path1	TRINITY_DN37871_c0_g1_i1.path1
TRINITY_DN80176_c0_g1_i1.path1	TRINITY_DN7934_c2_g3_i1.path1	TRINITY_DN20627_c0_g1_i1.path1	novel.7840	TRINITY_DN17371_c0_g2_i2.path4
novel.5524	Pepsico1_Contig19917.path1	TRINITY_DN15577_c0_g1_i4.path2	TRINITY_DN36958_c0_g2_i1.path1	TRINITY_DN8893_c0_g1_i7.path1
TRINITY_DN83999_c0_g1_i1.path1	TRINITY_DN923_c0_g3_i1.path1	TRINITY_DN10241_c0_g2_i1.path1	novel.8966	TRINITY_DN22779_c0_g1_i1.path1
novel.6375	novel.1729	novel.8141	TRINITY_DN4027_c5_g1_i1.path3	TRINITY_DN34931_c0_g2_i1.path1
TRINITY_DN94953_c0_g1_i1.path1	novel.33	novel.6167	TRINITY_DN34205_c0_g1_i1.path3	Pepsico1_Contig1214.path2
TRINITY_DN36320_c0_g1_i2.path2	Pepsico2_Contig17047.path1	TRINITY_DN37891_c0_g3_i1.path1	novel.10177	TRINITY_DN21706_c0_g2_i1.path1
TRINITY_DN11478_c0_g1_i4.path2	novel.7689	TRINITY_DN10334_c0_g1_i5.path1	Pepsico2_Contig1209.path1	Pepsico2_Contig15585.path1
novel.7602	TRINITY_DN18924_c0_g1_i1.path1	TRINITY_DN38179_c0_g1_i1.path1	TRINITY_DN608_c3_g1_i1.path3	TRINITY_DN26590_c0_g1_i1.path1
TRINITY_DN2294_c0_g2_i1.path1	Pepsico1_Contig33634.path1	TRINITY_DN11720_c0_g1_i3.path3	TRINITY_DN88746_c0_g1_i1.path1	TRINITY_DN19239_c0_g1_i1.path1
TRINITY_DN6846_c0_g2_i1.path1	novel.3990	TRINITY_DN19565_c0_g1_i3.path1	Pepsico1_Contig38168.path1	TRINITY_DN11360_c0_g1_i1.path1
Pepsico2_Contig19268.path3	TRINITY_DN25489_c0_g1_i1.path1	TRINITY_DN8978_c0_g1_i11.path1	novel.5667	TRINITY_DN18634_c0_g1_i6.path1
novel.2919	TRINITY_DN65812_c0_g1_i1.path2	TRINITY_DN1201_c2_g1_i2.path1	Pepsico1_Contig721.path1	TRINITY_DN60223_c0_g1_i1.path1
Pepsico2_Contig10332.path1	TRINITY_DN5591_c0_g1_i3.path2	TRINITY_DN5337_c0_g1_i4.path1	Pepsico2_Contig9474.path1	novel.7563
TRINITY_DN15334_c0_g1_i2.path2	novel.1347	novel.4252	TRINITY_DN12758_c2_g2_i1.path1	novel.928
TRINITY_DN37492_c0_g1_i1.path1	TRINITY_DN27300_c0_g1_i1.path1	novel.1537	TRINITY_DN23034_c0_g1_i1.path1	Pepsico2_Contig15299.path2
Pepsico2_Contig16917.path2	novel.7968	novel.2927	TRINITY_DN18829_c1_g1_i1.path2	TRINITY_DN7989_c2_g1_i1.path1
novel.2140	novel.2645	novel.5824	Pepsico2_Contig8556.path2	TRINITY_DN40809_c0_g1_i1.path1
novel.4275	TRINITY_DN13350_c0_g1_i1.path1	TRINITY_DN36422_c0_g1_i5.path2	novel.5275	Pepsico2_Contig16355.path1
TRINITY_DN4456_c0_g2_i10.path1	novel.4813	TRINITY_DN105904_c0_g1_i1.path3	TRINITY_DN112208_c0_g1_i1.path1	TRINITY_DN40685_c0_g1_i4.path1
Pepsico2_Contig12291.path1	TRINITY_DN40968_c0_g1_i1.path1	novel.3261	novel.5683	Pepsico2_Contig9614.path2
TRINITY_DN19477_c0_g1_i2.path1	novel.4272	Pepsico1_Contig36037.path1	TRINITY_DN10230_c0_g1_i5.path2	novel.2605
Pepsico1_Contig6170.path1	novel.10246	novel.6201	Pepsico2_Contig10040.path1	novel.3688
TRINITY_DN28718_c0_g4_i1.path1	TRINITY_DN2867_c0_g1_i4.path2	Pepsico2_Contig14938.path1	TRINITY_DN15966_c0_g1_i1.path1	TRINITY_DN3429_c1_g1_i2.path1
Pepsico1_Contig35948.path1	TRINITY_DN73289_c0_g1_i1.path1	TRINITY_DN19029_c0_g1_i1.path1	novel.7155	novel.3186
novel.8899	novel.3947	TRINITY_DN50909_c0_g1_i1.path1	TRINITY_DN12206_c1_g1_i1.path4	TRINITY_DN4783_c0_g2_i1.path1
TRINITY_DN24782_c0_g1_i1.path2	TRINITY_DN36488_c0_g2_i1.path1	TRINITY_DN22504_c0_g2_i1.path1	Pepsico2_Contig18100.path2	TRINITY_DN70348_c0_g1_i1.path1
TRINITY_DN12280_c0_g2_i1.path2	TRINITY_DN11431_c0_g1_i1.path2	novel.6391	TRINITY_DN10979_c0_g2_i8.path1	novel.9837
TRINITY_DN27737_c0_g1_i1.path1	novel.2457	TRINITY_DN10633_c0_g1_i1.path1	TRINITY_DN15354_c1_g2_i1.path1	novel.6295
Pepsico1_Contig6988.path1	TRINITY_DN76026_c0_g1_i1.path1	novel.1445	TRINITY_DN231_c2_g3_i1.path1	Pepsico1_Contig1188.path2
novel.4248	novel.10202	novel.4700	novel.7158	TRINITY_DN54463_c0_g1_i1.path1
TRINITY_DN25070_c0_g1_i1.path1	TRINITY_DN9291_c0_g1_i1.path1	Pepsico2_Contig3417.path2	TRINITY_DN43549_c0_g1_i1.path2	TRINITY_DN68746_c0_g1_i1.path1
TRINITY_DN32245_c0_g3_i1.path2	novel.10052	novel.2856	Pepsico1_Contig5480.path2	TRINITY_DN15697_c1_g1_i1.path5
Pepsico1_Contig3132.path4	novel.6103	novel.4230	TRINITY_DN16393_c0_g1_i1.path1	TRINITY_DN102507_c0_g1_i1.path1
novel.2800	Pepsico1_Contig882.path1	novel.3513	TRINITY_DN20295_c0_g1_i3.path1	TRINITY_DN23876_c1_g1_i1.path1
TRINITY_DN54221_c0_g1_i1.path2	TRINITY_DN37195_c1_g1_i1.path2	TRINITY_DN12206_c1_g1_i1.path4	Pepsico2_Contig17284.path1	novel.1069
TRINITY_DN1665_c1_g1_i1.path1	novel.7840	Pepsico2_Contig12326.path2	TRINITY_DN12806_c0_g1_i1.path1	TRINITY_DN37195_c1_g1_i1.path2
novel.1409	novel.6146	Pepsico1_Contig4939.path2	TRINITY_DN23525_c0_g2_i1.path1	novel.6388
Pepsico1_Contig10997.path1	TRINITY_DN7064_c1_g1_i4.path1	novel.9990	novel.10116	TRINITY_DN10981_c1_g1_i2.path1
Pepsico2_Contig7217.path2	TRINITY_DN64120_c0_g1_i1.path1	TRINITY_DN11773_c0_g2_i1.path3	TRINITY_DN55122_c0_g1_i1.path4	novel.3218
novel.3199	TRINITY_DN25628_c0_g1_i1.path1	TRINITY_DN16062_c0_g1_i1.path1	novel.10121	TRINITY_DN16922_c0_g5_i1.path3
novel.8161	TRINITY_DN23579_c0_g1_i1.path1	TRINITY_DN24307_c0_g1_i1.path1	novel.9993	TRINITY_DN57903_c0_g1_i1.path1
[truncated: 6,876 more rows]
