# Supplementary material for: Using transcriptome sequencing (RNA-Seq) to screen genes involved in β-glucan biosynthesis and accumulation during oat seed development
Source: PeerJ. 2024 Sep 25;12:e17804. doi: 10.7717/peerj.17804 (PMC11438436; doi:10.7717/peerj.17804)
Supplement: Supplemental Information 10 [file peerj-12-17804-s010.xlsx]

## Sheet: up
BY1vsDY1	BY2vsDY2	BY3vsDY3	BY4vsDY4	BY5vsDY5
Pepsico2_Contig14530.path1	Pepsico2_Contig14530.path1	TRINITY_DN80635_c0_g1_i1.path1	Pepsico2_Contig14530.path1	TRINITY_DN80635_c0_g1_i1.path1
TRINITY_DN497_c0_g1_i2.path1	TRINITY_DN22767_c0_g1_i1.path2	TRINITY_DN22767_c0_g1_i1.path2	Pepsico2_Contig19816.path1	TRINITY_DN22767_c0_g1_i1.path2
TRINITY_DN80635_c0_g1_i1.path1	novel.4050	Pepsico2_Contig19816.path1	TRINITY_DN80635_c0_g1_i1.path1	novel.751
novel.6646	Pepsico2_Contig19535.path1	Pepsico2_Contig14530.path1	novel.6653	Pepsico2_Contig14530.path1
TRINITY_DN3201_c0_g1_i4.path1	Pepsico1_Contig6915.path1	Pepsico1_Contig6915.path1	TRINITY_DN22767_c0_g1_i1.path2	Pepsico1_Contig5243.path1
Pepsico2_Contig19672.path3	TRINITY_DN1843_c0_g1_i4.path1	TRINITY_DN497_c0_g1_i2.path1	novel.751	novel.6653
TRINITY_DN1412_c0_g1_i1.path1	novel.751	novel.6646	TRINITY_DN497_c0_g1_i2.path1	TRINITY_DN27290_c0_g1_i1.path1
Pepsico2_Contig19816.path1	TRINITY_DN497_c0_g1_i2.path1	novel.8026	TRINITY_DN1843_c0_g1_i4.path1	TRINITY_DN6144_c0_g2_i2.path2
novel.301	Pepsico2_Contig8726.path1	Pepsico2_Contig2152.path1	novel.6646	TRINITY_DN497_c0_g1_i2.path1
TRINITY_DN10545_c0_g1_i3.path1	novel.8026	Pepsico1_Contig1188.path2	TRINITY_DN1412_c0_g1_i1.path1	novel.8026
Pepsico1_Contig27806.path1	novel.301	Pepsico2_Contig12395.path1	Pepsico2_Contig19535.path1	Pepsico2_Contig19816.path1
novel.8751	Pepsico2_Contig7908.path1	TRINITY_DN2977_c0_g1_i11.path1	Pepsico2_Contig12395.path1	novel.6646
novel.9909	Pepsico1_Contig1188.path2	TRINITY_DN33186_c0_g2_i1.path1	TRINITY_DN5942_c1_g1_i4.path1	novel.9793
novel.10331	TRINITY_DN1004_c0_g1_i1.path1	Pepsico2_Contig7908.path1	Pepsico1_Contig38.path2	novel.4758
novel.7503	novel.2589	TRINITY_DN19850_c0_g1_i11.path2	Pepsico1_Contig7725.path1	novel.8751
Pepsico2_Contig7908.path1	novel.8751	Pepsico1_Contig38.path2	novel.8026	novel.7503
TRINITY_DN22767_c0_g1_i1.path2	Pepsico2_Contig12395.path1	TRINITY_DN28508_c0_g1_i6.path1	novel.7686	TRINITY_DN1004_c0_g1_i1.path1
novel.316	Pepsico2_Contig20783.path1	Pepsico2_Contig1861.path1	TRINITY_DN7068_c0_g1_i5.path1	novel.301
novel.2852	novel.6646	novel.301	Pepsico1_Contig1181.path2	novel.2589
TRINITY_DN1004_c0_g1_i1.path1	TRINITY_DN11760_c0_g1_i2.path1	Pepsico2_Contig19535.path1	TRINITY_DN19850_c0_g1_i11.path2	TRINITY_DN107613_c0_g1_i1.path1
TRINITY_DN107613_c0_g1_i1.path1	TRINITY_DN19850_c0_g1_i11.path2	Pepsico1_Contig36309.path2	TRINITY_DN6144_c0_g2_i2.path2	Pepsico1_Contig5522.path4
TRINITY_DN69_c1_g2_i2.path1	TRINITY_DN33186_c0_g2_i1.path1	TRINITY_DN1004_c0_g1_i1.path1	TRINITY_DN4449_c0_g3_i2.path2	Pepsico2_Contig20783.path1
Pepsico1_Contig6915.path1	novel.2953	Pepsico1_Contig3100.path2	Pepsico1_Contig6915.path1	Pepsico2_Contig1861.path1
TRINITY_DN2977_c0_g1_i11.path1	TRINITY_DN28508_c0_g1_i6.path1	novel.8751	novel.2589	TRINITY_DN22077_c0_g1_i12.path2
TRINITY_DN8645_c0_g1_i16.path1	Pepsico1_Contig1181.path2	Pepsico2_Contig9370.path1	novel.4758	Pepsico1_Contig37863.path1
TRINITY_DN323_c0_g1_i2.path1	Pepsico2_Contig11265.path1	novel.1361	Pepsico1_Contig5243.path1	TRINITY_DN69_c1_g1_i1.path3
TRINITY_DN34912_c0_g1_i2.path1	Pepsico2_Contig1861.path1	TRINITY_DN107613_c0_g1_i1.path1	Pepsico2_Contig20783.path1	TRINITY_DN25384_c0_g2_i1.path1
TRINITY_DN69_c1_g1_i1.path3	novel.1361	Pepsico2_Contig15428.path1	TRINITY_DN1004_c0_g1_i1.path1	TRINITY_DN3201_c0_g1_i4.path1
TRINITY_DN31113_c0_g3_i2.path1	TRINITY_DN2977_c0_g1_i11.path1	novel.6233	novel.2953	TRINITY_DN1412_c0_g1_i1.path1
Pepsico1_Contig4492.path1	novel.9622	novel.2953	novel.5747	TRINITY_DN19850_c0_g1_i11.path2
TRINITY_DN5482_c0_g1_i1.path1	novel.8	novel.2852	novel.7326	TRINITY_DN33186_c0_g2_i1.path1
TRINITY_DN10665_c0_g1_i2.path1	TRINITY_DN323_c0_g1_i2.path1	TRINITY_DN25186_c0_g1_i1.path3	Pepsico2_Contig8726.path1	novel.5747
novel.1361	novel.7503	novel.4536	novel.301	novel.10331
novel.6907	Pepsico2_Contig19444.path1	Pepsico1_Contig5243.path1	novel.10331	novel.4532
TRINITY_DN6144_c0_g2_i2.path2	novel.10331	novel.7098	novel.4532	TRINITY_DN10594_c0_g1_i4.path1
Pepsico2_Contig12395.path1	TRINITY_DN1412_c0_g1_i1.path1	TRINITY_DN24_c2_g1_i1.path1	novel.8751	TRINITY_DN2389_c0_g1_i4.path1
Pepsico2_Contig14131.path1	Pepsico1_Contig5522.path4	Pepsico1_Contig4492.path1	TRINITY_DN5174_c1_g1_i2.path1	TRINITY_DN35472_c2_g1_i1.path1
novel.897	Pepsico2_Contig15428.path1	novel.6221	TRINITY_DN28508_c0_g1_i6.path1	novel.7686
novel.8	TRINITY_DN24_c2_g1_i1.path1	Pepsico1_Contig1181.path2	novel.897	Pepsico2_Contig2152.path1
TRINITY_DN12381_c0_g2_i1.path1	novel.2989	TRINITY_DN1502_c0_g1_i2.path1	TRINITY_DN107613_c0_g1_i1.path1	novel.8920
TRINITY_DN10081_c0_g1_i2.path1	TRINITY_DN69_c1_g1_i1.path3	novel.897	Pepsico2_Contig1861.path1	TRINITY_DN11134_c0_g1_i14.path1
novel.6233	TRINITY_DN107613_c0_g1_i1.path1	TRINITY_DN6144_c0_g2_i2.path2	novel.1283	novel.3230
Pepsico2_Contig16302.path2	novel.2852	TRINITY_DN14220_c0_g2_i6.path1	novel.2160	novel.7988
TRINITY_DN8645_c0_g1_i16.path2	novel.10104	Pepsico1_Contig7725.path1	Pepsico2_Contig550.path1	TRINITY_DN22830_c0_g2_i1.path1
Pepsico2_Contig1861.path1	Pepsico2_Contig12819.path1	novel.316	TRINITY_DN2977_c0_g1_i11.path1	TRINITY_DN21589_c1_g1_i1.path1
novel.2989	novel.316	TRINITY_DN1502_c0_g4_i1.path1	novel.10187	TRINITY_DN4708_c1_g1_i2.path1
Pepsico2_Contig14131.path2	novel.897	Pepsico2_Contig15229.path2	TRINITY_DN3664_c0_g3_i1.path1	TRINITY_DN4027_c0_g2_i1.path1
TRINITY_DN35472_c2_g1_i1.path1	Pepsico2_Contig20185.path1	Pepsico2_Contig19672.path3	novel.9227	TRINITY_DN2977_c0_g1_i11.path1
Pepsico2_Contig3599.path1	novel.7686	TRINITY_DN4708_c1_g1_i2.path1	TRINITY_DN826_c0_g1_i8.path2	novel.897
novel.8929	Pepsico1_Contig4492.path1	TRINITY_DN15163_c0_g1_i1.path1	novel.8601	novel.4544
novel.4967	novel.6233	novel.2589	TRINITY_DN11785_c1_g1_i1.path1	TRINITY_DN25186_c0_g1_i1.path3
novel.4544	TRINITY_DN10594_c0_g1_i4.path1	novel.10331	Pepsico2_Contig7217.path2	novel.6930
novel.8026	Pepsico2_Contig2921.path1	TRINITY_DN15073_c0_g1_i2.path1	Pepsico1_Contig36309.path2	novel.4538
Pepsico2_Contig12871.path3	Pepsico2_Contig17521.path1	TRINITY_DN1843_c0_g1_i4.path1	TRINITY_DN36478_c0_g1_i3.path1	TRINITY_DN78620_c0_g1_i1.path1
TRINITY_DN33878_c0_g1_i2.path1	TRINITY_DN15163_c0_g1_i1.path1	TRINITY_DN35472_c2_g1_i1.path1	novel.7949	Pepsico2_Contig14412.path3
TRINITY_DN25530_c0_g1_i1.path1	Pepsico2_Contig16302.path2	novel.4544	novel.9302	Pepsico1_Contig6915.path1
TRINITY_DN78620_c0_g1_i1.path1	TRINITY_DN8751_c0_g1_i3.path1	TRINITY_DN38303_c0_g1_i2.path1	Pepsico1_Contig37863.path1	TRINITY_DN14481_c1_g2_i1.path1
TRINITY_DN28508_c0_g1_i6.path1	TRINITY_DN1502_c0_g1_i2.path1	novel.4532	novel.2	novel.4536
Pepsico2_Contig16720.path1	TRINITY_DN73349_c0_g1_i1.path1	novel.9622	Pepsico1_Contig4492.path1	Pepsico1_Contig4492.path1
Pepsico2_Contig11468.path1	Pepsico1_Contig36309.path2	novel.6041	novel.7823	Pepsico1_Contig1181.path2
TRINITY_DN10626_c0_g1_i1.path1	TRINITY_DN13168_c0_g1_i1.path1	TRINITY_DN38626_c0_g3_i1.path1	novel.2852	Pepsico2_Contig6237.path2
novel.4050	novel.6041	TRINITY_DN59680_c0_g1_i1.path1	novel.6124	TRINITY_DN31855_c0_g1_i2.path2
TRINITY_DN13415_c0_g3_i3.path1	novel.9245	TRINITY_DN33186_c0_g1_i2.path1	Pepsico2_Contig2921.path1	novel.1283
novel.4536	novel.4536	Pepsico2_Contig8726.path1	TRINITY_DN25384_c0_g2_i1.path1	TRINITY_DN22959_c0_g1_i1.path2
novel.1283	TRINITY_DN5246_c0_g1_i1.path1	Pepsico2_Contig5160.path1	novel.6221	novel.2633
TRINITY_DN18390_c0_g1_i1.path1	TRINITY_DN4708_c1_g1_i2.path1	TRINITY_DN323_c0_g1_i2.path1	novel.4050	TRINITY_DN4027_c0_g5_i1.path1
TRINITY_DN21589_c1_g1_i1.path1	Pepsico2_Contig3599.path1	TRINITY_DN13881_c0_g2_i8.path1	novel.6041	Pepsico2_Contig12395.path1
TRINITY_DN4027_c0_g2_i1.path1	TRINITY_DN21589_c1_g1_i1.path1	novel.10104	TRINITY_DN11134_c0_g1_i14.path1	Pepsico2_Contig15229.path2
novel.10104	TRINITY_DN13415_c0_g3_i3.path1	TRINITY_DN14238_c1_g1_i1.path1	TRINITY_DN21589_c1_g1_i1.path1	Pepsico2_Contig13697.path1
novel.7301	TRINITY_DN16546_c0_g1_i4.path1	TRINITY_DN69_c1_g1_i1.path3	Pepsico2_Contig2152.path1	Pepsico2_Contig3775.path1
Pepsico2_Contig8726.path1	TRINITY_DN23493_c0_g1_i1.path1	novel.8	Pepsico2_Contig20778.path1	novel.6941
Pepsico2_Contig5160.path1	TRINITY_DN35543_c0_g1_i4.path1	Pepsico1_Contig37863.path1	Pepsico2_Contig7908.path1	Pepsico1_Contig32548.path2
Pepsico2_Contig8462.path1	Pepsico1_Contig37533.path3	novel.9991	novel.316	TRINITY_DN28508_c0_g1_i6.path1
Pepsico1_Contig3957.path1	novel.9392	TRINITY_DN6439_c0_g1_i1.path2	Pepsico1_Contig24342.path2	novel.6221
novel.6343	Pepsico2_Contig8462.path1	TRINITY_DN2389_c0_g1_i4.path1	TRINITY_DN4708_c1_g1_i2.path1	Pepsico1_Contig37537.path1
Pepsico2_Contig9477.path1	Pepsico2_Contig5160.path1	TRINITY_DN12964_c1_g1_i1.path2	novel.3834	TRINITY_DN4532_c0_g1_i4.path2
TRINITY_DN10665_c0_g1_i2.path2	novel.10525	TRINITY_DN13415_c0_g3_i3.path1	Pepsico1_Contig2510.path2	Pepsico1_Contig556.path1
TRINITY_DN33186_c0_g2_i1.path1	novel.6221	Pepsico2_Contig4524.path1	TRINITY_DN4532_c0_g1_i4.path2	TRINITY_DN106297_c0_g1_i1.path1
TRINITY_DN4708_c1_g1_i2.path1	novel.8632	TRINITY_DN556_c0_g1_i1.path3	TRINITY_DN21916_c0_g1_i1.path1	TRINITY_DN4515_c0_g1_i17.path1
TRINITY_DN33186_c0_g1_i2.path1	Pepsico1_Contig24342.path2	TRINITY_DN25384_c0_g2_i1.path1	TRINITY_DN15163_c0_g1_i1.path1	novel.2852
Pepsico2_Contig9200.path1	Pepsico2_Contig2152.path1	Pepsico2_Contig4927.path1	novel.4536	Pepsico2_Contig4571.path1
TRINITY_DN11760_c0_g1_i2.path1	Pepsico1_Contig32548.path2	TRINITY_DN78620_c0_g1_i1.path1	Pepsico2_Contig14412.path3	novel.9622
Pepsico2_Contig12819.path1	TRINITY_DN4449_c0_g3_i2.path2	Pepsico1_Contig37533.path3	TRINITY_DN17463_c0_g1_i3.path1	novel.8378
Pepsico2_Contig5219.path1	Pepsico2_Contig9370.path1	Pepsico1_Contig32548.path2	TRINITY_DN20133_c0_g1_i3.path1	novel.4196
TRINITY_DN5482_c0_g1_i1.path2	TRINITY_DN5457_c0_g1_i2.path1	Pepsico2_Contig6644.path1	novel.2989	Pepsico1_Contig3453.path1
TRINITY_DN2551_c0_g2_i2.path2	novel.4544	TRINITY_DN10626_c0_g1_i1.path1	Pepsico2_Contig13697.path1	TRINITY_DN13294_c0_g1_i1.path1
novel.3826	TRINITY_DN35472_c2_g1_i1.path1	novel.2989	novel.8920	TRINITY_DN82762_c0_g1_i1.path1
Pepsico2_Contig2484.path1	Pepsico2_Contig7217.path2	Pepsico1_Contig37537.path1	TRINITY_DN323_c0_g1_i2.path1	TRINITY_DN476_c0_g1_i1.path1
novel.6696	Pepsico1_Contig28299.path1	TRINITY_DN11785_c1_g1_i1.path1	TRINITY_DN35472_c2_g1_i1.path1	Pepsico2_Contig17149.path2
Pepsico1_Contig6110.path1	Pepsico2_Contig1343.path2	Pepsico1_Contig24342.path2	TRINITY_DN2389_c0_g1_i4.path1	TRINITY_DN38303_c0_g1_i2.path1
TRINITY_DN46389_c0_g1_i1.path1	Pepsico2_Contig15229.path2	TRINITY_DN4027_c0_g2_i1.path1	Pepsico2_Contig13314.path1	TRINITY_DN69_c1_g2_i2.path1
novel.4742	Pepsico2_Contig14708.path1	Pepsico2_Contig9200.path1	Pepsico1_Contig3100.path2	TRINITY_DN9366_c0_g1_i4.path1
Pepsico1_Contig7932.path1	TRINITY_DN33186_c0_g1_i2.path1	Pepsico2_Contig20778.path1	TRINITY_DN38303_c0_g1_i2.path1	TRINITY_DN9386_c0_g1_i5.path1
Pepsico1_Contig32548.path2	TRINITY_DN31113_c0_g3_i2.path1	TRINITY_DN10594_c0_g1_i4.path1	novel.9793	novel.3205
TRINITY_DN36154_c0_g1_i3.path1	Pepsico2_Contig16720.path1	Pepsico2_Contig10529.path2	novel.4544	TRINITY_DN582_c2_g1_i6.path1
novel.7923	TRINITY_DN29983_c0_g1_i2.path1	novel.8378	novel.9622	novel.4772
novel.5908	TRINITY_DN7147_c0_g1_i3.path1	novel.2633	Pepsico2_Contig10700.path1	Pepsico2_Contig7217.path2
TRINITY_DN10594_c0_g1_i4.path1	novel.10140	novel.2160	TRINITY_DN69_c1_g1_i1.path3	TRINITY_DN44353_c0_g1_i1.path1
Pepsico2_Contig19535.path1	Pepsico1_Contig5243.path1	Pepsico2_Contig13697.path1	TRINITY_DN3201_c0_g1_i4.path1	Pepsico2_Contig3409.path1
TRINITY_DN9020_c0_g1_i24.path1	Pepsico2_Contig11468.path1	Pepsico1_Contig7932.path1	novel.6928	novel.8218
TRINITY_DN22830_c0_g2_i1.path1	Pepsico1_Contig37537.path1	TRINITY_DN53999_c0_g1_i1.path1	novel.4538	novel.3208
novel.620	novel.8378	TRINITY_DN9776_c0_g1_i9.path2	Pepsico1_Contig556.path1	TRINITY_DN9055_c0_g1_i3.path1
novel.3786	Pepsico2_Contig2618.path1	novel.4758	novel.10104	TRINITY_DN11195_c1_g1_i1.path2
novel.5176	Pepsico1_Contig3978.path1	TRINITY_DN17463_c0_g1_i3.path1	TRINITY_DN78620_c0_g1_i1.path1	Pepsico1_Contig38.path2
TRINITY_DN11328_c0_g1_i1.path1	TRINITY_DN7084_c0_g1_i3.path1	TRINITY_DN7084_c0_g1_i3.path1	Pepsico1_Contig771.path1	TRINITY_DN4449_c0_g3_i2.path2
Pepsico2_Contig3775.path1	TRINITY_DN78620_c0_g1_i1.path1	TRINITY_DN3201_c0_g1_i4.path1	TRINITY_DN14202_c0_g3_i2.path1	TRINITY_DN15073_c0_g1_i2.path1
novel.6221	TRINITY_DN4027_c0_g2_i1.path1	TRINITY_DN9020_c0_g1_i24.path1	Pepsico2_Contig15229.path2	Pepsico2_Contig5160.path1
TRINITY_DN7072_c7_g1_i1.path1	TRINITY_DN59441_c0_g1_i2.path4	TRINITY_DN22830_c0_g2_i1.path1	TRINITY_DN5457_c0_g1_i2.path1	novel.5092
novel.1226	novel.8740	Pepsico2_Contig11265.path1	Pepsico2_Contig16986.path2	novel.9673
novel.10227	TRINITY_DN9020_c0_g1_i24.path1	TRINITY_DN29983_c0_g1_i2.path1	TRINITY_DN17793_c0_g3_i2.path1	TRINITY_DN12040_c0_g1_i15.path2
novel.5859	Pepsico2_Contig10529.path2	novel.6055	novel.6930	TRINITY_DN31623_c1_g1_i1.path1
TRINITY_DN476_c0_g1_i1.path1	novel.10047	novel.10047	TRINITY_DN9637_c0_g1_i4.path1	Pepsico1_Contig32542.path1
novel.9676	TRINITY_DN10626_c0_g1_i1.path1	Pepsico1_Contig3453.path1	Pepsico1_Contig3453.path1	TRINITY_DN1019_c0_g2_i1.path2
TRINITY_DN21549_c0_g1_i1.path1	TRINITY_DN476_c0_g1_i1.path1	novel.7686	novel.4836	novel.2863
novel.7944	novel.9673	novel.8740	novel.8378	novel.4680
TRINITY_DN34221_c0_g1_i1.path2	Pepsico2_Contig9200.path1	Pepsico2_Contig16720.path1	TRINITY_DN53548_c0_g1_i1.path1	TRINITY_DN4954_c0_g2_i1.path1
Pepsico2_Contig426.path1	novel.4532	Pepsico2_Contig14570.path1	TRINITY_DN25461_c0_g1_i1.path1	novel.2
novel.6659	novel.7137	TRINITY_DN5457_c0_g1_i2.path1	TRINITY_DN5246_c0_g1_i1.path1	novel.4542
novel.9673	Pepsico1_Contig8217.path2	TRINITY_DN8605_c0_g1_i8.path1	TRINITY_DN8849_c1_g1_i7.path1	novel.2160
TRINITY_DN13168_c0_g1_i1.path1	TRINITY_DN57903_c0_g2_i1.path5	TRINITY_DN44840_c1_g1_i1.path5	novel.6233	TRINITY_DN16546_c0_g1_i4.path1
Pepsico1_Contig37533.path3	novel.7923	Pepsico1_Contig32542.path1	TRINITY_DN33186_c0_g1_i2.path1	TRINITY_DN15163_c0_g1_i1.path1
novel.6080	novel.9827	novel.9793	Pepsico2_Contig5160.path1	novel.7886
Pepsico2_Contig20783.path1	novel.6055	Pepsico2_Contig4571.path1	novel.8682	TRINITY_DN7068_c0_g1_i5.path1
Pepsico1_Contig415.path1	TRINITY_DN3201_c0_g1_i4.path1	TRINITY_DN22959_c0_g1_i1.path2	Pepsico2_Contig7195.path2	TRINITY_DN44840_c1_g1_i1.path5
novel.8740	novel.5908	novel.4538	TRINITY_DN22830_c0_g2_i1.path1	Pepsico2_Contig426.path1
novel.5862	novel.3660	novel.1239	TRINITY_DN10594_c0_g1_i4.path1	Pepsico2_Contig20778.path1
novel.5556	Pepsico2_Contig17149.path2	novel.2	TRINITY_DN44840_c1_g1_i1.path5	Pepsico2_Contig337.path1
novel.6658	TRINITY_DN34912_c0_g1_i2.path1	TRINITY_DN9055_c0_g1_i3.path1	Pepsico1_Contig37537.path1	TRINITY_DN9020_c0_g1_i24.path1
TRINITY_DN8471_c0_g2_i2.path1	novel.2633	TRINITY_DN17793_c0_g3_i2.path1	Pepsico1_Contig37533.path3	TRINITY_DN25005_c0_g1_i1.path1
novel.7098	novel.1672	Pepsico2_Contig11468.path1	TRINITY_DN13415_c0_g3_i3.path1	novel.4050
TRINITY_DN56186_c0_g1_i1.path2	novel.9991	novel.4742	Pepsico2_Contig6237.path2	novel.8962
novel.8378	TRINITY_DN6144_c0_g2_i2.path2	Pepsico2_Contig2921.path1	novel.2633	novel.9302
novel.3208	TRINITY_DN53999_c0_g1_i1.path1	novel.5092	novel.4680	novel.1245
Pepsico1_Contig7725.path1	TRINITY_DN22830_c0_g2_i1.path1	TRINITY_DN7127_c0_g2_i6.path2	Pepsico1_Contig865.path1	novel.4448
TRINITY_DN53621_c0_g1_i1.path1	novel.7301	Pepsico2_Contig1343.path2	TRINITY_DN8639_c0_g2_i1.path3	novel.316
TRINITY_DN5457_c0_g1_i2.path1	novel.1795	TRINITY_DN10081_c0_g1_i2.path1	Pepsico2_Contig10529.path2	TRINITY_DN5457_c0_g1_i2.path1
TRINITY_DN18240_c0_g3_i1.path1	novel.9699	TRINITY_DN34205_c0_g1_i1.path3	novel.10047	Pepsico2_Contig550.path1
TRINITY_DN18254_c0_g1_i1.path1	Pepsico1_Contig3453.path1	TRINITY_DN53621_c0_g1_i1.path1	Pepsico1_Contig32542.path1	TRINITY_DN8484_c0_g4_i1.path1
TRINITY_DN6677_c0_g2_i2.path1	TRINITY_DN23256_c0_g1_i1.path1	TRINITY_DN5246_c0_g1_i1.path1	novel.3230	novel.6402
Pepsico2_Contig20590.path1	TRINITY_DN12320_c0_g1_i2.path1	novel.4680	Pepsico2_Contig11265.path1	Pepsico2_Contig11468.path1
TRINITY_DN12703_c0_g2_i1.path1	TRINITY_DN4092_c0_g1_i3.path2	novel.9673	novel.9392	TRINITY_DN13415_c0_g3_i3.path1
Pepsico1_Contig17817.path1	novel.7098	Pepsico2_Contig17149.path2	novel.7886	TRINITY_DN8471_c0_g2_i2.path1
TRINITY_DN6102_c0_g1_i1.path1	novel.354	novel.7923	novel.6941	novel.4103
TRINITY_DN7084_c0_g1_i3.path1	Pepsico1_Contig1180.path1	novel.3660	novel.7988	TRINITY_DN34497_c1_g1_i1.path3
TRINITY_DN13776_c0_g1_i3.path1	TRINITY_DN9055_c0_g1_i3.path1	TRINITY_DN14129_c0_g1_i5.path3	TRINITY_DN25384_c0_g1_i1.path1	TRINITY_DN31456_c0_g2_i4.path2
Pepsico1_Contig37537.path1	TRINITY_DN7072_c7_g1_i1.path1	novel.2456	TRINITY_DN19031_c0_g2_i1.path1	TRINITY_DN13624_c0_g1_i5.path1
TRINITY_DN14314_c1_g1_i2.path1	Pepsico2_Contig4524.path1	novel.5747	TRINITY_DN22959_c0_g1_i1.path2	TRINITY_DN4515_c0_g1_i17.path2
TRINITY_DN69_c2_g1_i1.path1	novel.4790	novel.6653	Pepsico2_Contig4893.path1	novel.1491
novel.354	Pepsico2_Contig19672.path3	TRINITY_DN1567_c0_g1_i5.path1	Pepsico1_Contig1514.path1	novel.7120
Pepsico2_Contig12122.path1	TRINITY_DN22689_c0_g1_i1.path1	Pepsico1_Contig3978.path1	Pepsico2_Contig19672.path3	novel.7121
Pepsico1_Contig37847.path1	novel.4103	novel.9392	TRINITY_DN10626_c0_g1_i1.path1	TRINITY_DN4027_c0_g5_i1.path2
novel.2633	TRINITY_DN59441_c0_g1_i2.path2	Pepsico2_Contig12299.path1	Pepsico2_Contig4571.path1	TRINITY_DN29983_c0_g1_i2.path1
novel.751	TRINITY_DN18254_c0_g1_i1.path1	TRINITY_DN20133_c0_g1_i3.path1	Pepsico2_Contig11468.path1	TRINITY_DN31207_c0_g1_i1.path1
Pepsico2_Contig8546.path1	Pepsico2_Contig19824.path1	TRINITY_DN7072_c7_g1_i1.path1	TRINITY_DN9693_c0_g1_i7.path1	TRINITY_DN5174_c1_g1_i2.path1
novel.2963	TRINITY_DN24376_c0_g3_i1.path1	Pepsico1_Contig1180.path1	Pepsico2_Contig3775.path1	TRINITY_DN21549_c0_g1_i1.path1
TRINITY_DN59017_c0_g1_i1.path1	TRINITY_DN78715_c0_g1_i1.path1	TRINITY_DN42926_c0_g1_i1.path1	Pepsico1_Contig1451.path1	novel.3206
Pepsico2_Contig17466.path1	novel.4742	novel.3434	TRINITY_DN9366_c0_g1_i4.path1	novel.5020
Pepsico2_Contig3409.path1	TRINITY_DN18161_c0_g1_i10.path1	novel.6080	TRINITY_DN9055_c0_g1_i3.path1	novel.10047
TRINITY_DN15163_c0_g1_i1.path1	TRINITY_DN2551_c0_g2_i2.path2	novel.8314	TRINITY_DN31456_c0_g2_i4.path2	novel.7098
TRINITY_DN9393_c0_g1_i1.path1	novel.5933	Pepsico2_Contig10700.path1	novel.10042	TRINITY_DN33186_c0_g1_i2.path1
Pepsico1_Contig37386.path1	TRINITY_DN7630_c0_g1_i1.path3	TRINITY_DN73349_c0_g1_i1.path1	Pepsico2_Contig9200.path1	novel.6928
TRINITY_DN40822_c0_g1_i1.path2	Pepsico2_Contig14747.path1	novel.7988	TRINITY_DN4027_c0_g2_i1.path1	novel.6080
novel.8218	novel.8142	TRINITY_DN12703_c0_g2_i1.path1	Pepsico2_Contig3196.path2	Pepsico2_Contig7195.path2
novel.6055	Pepsico2_Contig9276.path1	novel.3208	Pepsico1_Contig37308.path1	TRINITY_DN1567_c0_g1_i5.path1
novel.121	novel.7886	TRINITY_DN26454_c0_g1_i1.path3	Pepsico1_Contig32548.path2	Pepsico2_Contig7908.path1
novel.8962	TRINITY_DN45056_c0_g2_i1.path1	Pepsico2_Contig20185.path1	TRINITY_DN53621_c0_g1_i1.path1	novel.4742
TRINITY_DN10416_c0_g2_i1.path1	novel.1381	novel.3230	TRINITY_DN6439_c0_g1_i1.path2	TRINITY_DN53472_c0_g1_i1.path1
TRINITY_DN17122_c0_g1_i2.path1	TRINITY_DN11944_c0_g1_i1.path1	TRINITY_DN21589_c1_g1_i1.path1	novel.1361	novel.10447
novel.6932	Pepsico2_Contig17466.path1	novel.9373	novel.4542	TRINITY_DN20313_c0_g1_i6.path3
novel.9674	TRINITY_DN26301_c0_g1_i2.path1	novel.1736	novel.4742	Pepsico1_Contig28299.path1
novel.3660	TRINITY_DN82047_c0_g1_i1.path1	TRINITY_DN28069_c0_g1_i5.path1	TRINITY_DN26560_c0_g2_i1.path1	TRINITY_DN11705_c0_g1_i1.path1
novel.5092	novel.7944	TRINITY_DN11134_c0_g1_i14.path1	TRINITY_DN13881_c0_g2_i8.path1	novel.1239
novel.6224	Pepsico2_Contig18053.path1	TRINITY_DN9385_c2_g1_i1.path1	TRINITY_DN53999_c0_g1_i1.path1	TRINITY_DN323_c0_g1_i2.path1
TRINITY_DN12320_c0_g1_i2.path1	Pepsico2_Contig3775.path1	novel.3205	Pepsico1_Contig36152.path1	TRINITY_DN33640_c0_g3_i1.path1
novel.9699	TRINITY_DN42926_c0_g1_i1.path1	novel.9676	novel.8632	novel.4815
Pepsico2_Contig6725.path2	TRINITY_DN1502_c0_g4_i1.path1	TRINITY_DN476_c0_g1_i1.path1	novel.4103	novel.1226
novel.9622	TRINITY_DN11357_c0_g1_i1.path1	TRINITY_DN24376_c0_g3_i1.path1	Pepsico2_Contig200.path1	Pepsico2_Contig15659.path2
novel.5126	novel.3786	novel.3198	TRINITY_DN69_c1_g2_i2.path1	TRINITY_DN12320_c0_g1_i2.path1
novel.6341	novel.5533	Pepsico2_Contig3775.path1	novel.9373	TRINITY_DN49890_c0_g1_i1.path1
novel.7120	TRINITY_DN2389_c0_g1_i4.path1	TRINITY_DN9366_c0_g1_i4.path1	novel.4196	TRINITY_DN10626_c0_g1_i1.path1
TRINITY_DN17710_c0_g2_i2.path1	novel.5092	novel.4815	TRINITY_DN9020_c0_g1_i24.path1	TRINITY_DN6501_c0_g1_i1.path1
Pepsico1_Contig34145.path1	Pepsico2_Contig2484.path1	TRINITY_DN45056_c0_g2_i1.path1	TRINITY_DN10081_c0_g1_i2.path1	TRINITY_DN6439_c0_g1_i1.path2
TRINITY_DN1843_c0_g1_i4.path1	novel.3208	novel.9699	novel.3205	TRINITY_DN8639_c0_g2_i1.path3
TRINITY_DN16546_c0_g1_i4.path1	Pepsico1_Contig34145.path1	novel.3206	novel.9057	TRINITY_DN24376_c0_g3_i1.path1
TRINITY_DN12383_c0_g1_i2.path1	Pepsico1_Contig32542.path1	TRINITY_DN26301_c0_g1_i2.path1	TRINITY_DN20313_c0_g1_i6.path3	TRINITY_DN20226_c0_g1_i3.path1
novel.3198	Pepsico1_Contig7932.path1	novel.6059	TRINITY_DN37359_c0_g1_i1.path3	novel.1186
TRINITY_DN9366_c0_g1_i4.path1	novel.4967	Pepsico2_Contig13314.path1	novel.3208	novel.9227
novel.4815	Pepsico2_Contig3449.path1	novel.7944	TRINITY_DN4027_c0_g5_i1.path1	TRINITY_DN10860_c0_g1_i2.path1
novel.5385	TRINITY_DN8494_c1_g2_i1.path1	Pepsico1_Contig34145.path1	novel.8218	TRINITY_DN19732_c1_g1_i2.path1
Pepsico1_Contig5243.path1	TRINITY_DN7127_c0_g2_i6.path2	novel.7886	novel.7132	TRINITY_DN8849_c1_g1_i7.path1
TRINITY_DN24376_c0_g3_i1.path1	novel.8962	TRINITY_DN8862_c2_g1_i8.path2	novel.9991	novel.5670
TRINITY_DN26813_c0_g1_i5.path1	novel.2456	TRINITY_DN8494_c1_g2_i1.path1	Pepsico1_Contig66.path1	novel.9392
novel.6924	TRINITY_DN9366_c0_g1_i4.path1	novel.7772	TRINITY_DN7242_c0_g1_i2.path1	TRINITY_DN21044_c2_g1_i1.path4
TRINITY_DN28959_c0_g1_i1.path1	Pepsico2_Contig7839.path1	novel.4448	Pepsico2_Contig8462.path1	novel.10104
novel.4444	novel.1283	TRINITY_DN20313_c0_g1_i6.path3	TRINITY_DN41957_c0_g1_i1.path1	Pepsico2_Contig12443.path1
TRINITY_DN5246_c0_g1_i1.path1	TRINITY_DN22992_c0_g1_i1.path1	TRINITY_DN4954_c0_g2_i1.path1	novel.9673	TRINITY_DN25461_c0_g1_i1.path1
novel.1736	novel.3210	TRINITY_DN6501_c0_g1_i1.path1	TRINITY_DN42400_c4_g1_i1.path1	novel.1356
Pepsico1_Contig6150.path1	novel.7292	TRINITY_DN17793_c0_g1_i1.path1	novel.5556	Pepsico2_Contig19672.path3
novel.79	novel.6355	novel.354	Pepsico1_Contig2846.path1	novel.6992
TRINITY_DN9055_c0_g1_i3.path1	TRINITY_DN17440_c0_g1_i1.path1	TRINITY_DN18254_c0_g1_i1.path1	TRINITY_DN10664_c1_g6_i1.path1	TRINITY_DN71743_c0_g1_i1.path1
TRINITY_DN7355_c0_g1_i2.path2	Pepsico2_Contig14570.path1	Pepsico2_Contig14412.path3	Pepsico1_Contig33505.path1	TRINITY_DN4076_c0_g1_i5.path1
novel.7833	TRINITY_DN9737_c2_g1_i1.path1	novel.5908	Pepsico2_Contig17149.path2	novel.2989
novel.3221	novel.1717	novel.1491	Pepsico1_Contig3978.path1	TRINITY_DN8471_c0_g1_i4.path1
TRINITY_DN26301_c0_g1_i2.path1	TRINITY_DN53621_c0_g1_i1.path1	TRINITY_DN10891_c0_g1_i1.path3	TRINITY_DN476_c0_g1_i1.path1	Pepsico1_Contig37533.path3
novel.4790	Pepsico1_Contig1896.path1	novel.1717	novel.8740	novel.7944
TRINITY_DN23256_c0_g1_i1.path1	TRINITY_DN28069_c0_g1_i5.path1	novel.8218	TRINITY_DN21549_c0_g1_i1.path1	TRINITY_DN53999_c0_g1_i1.path1
TRINITY_DN78715_c0_g1_i1.path1	novel.8016	novel.4772	TRINITY_DN13294_c0_g1_i1.path1	Pepsico2_Contig3599.path1
novel.7686	novel.6224	novel.6341	TRINITY_DN7084_c0_g1_i3.path1	novel.5908
novel.6225	TRINITY_DN8471_c0_g2_i2.path1	Pepsico2_Contig3599.path1	Pepsico2_Contig426.path1	TRINITY_DN5246_c0_g1_i1.path1
novel.4103	novel.7120	novel.6224	TRINITY_DN1567_c0_g1_i5.path1	Pepsico2_Contig2484.path1
Pepsico1_Contig4680.path1	TRINITY_DN25186_c0_g1_i1.path3	TRINITY_DN7993_c0_g1_i8.path1	TRINITY_DN24376_c0_g3_i1.path1	TRINITY_DN12145_c0_g1_i1.path1
TRINITY_DN42926_c0_g1_i1.path1	novel.4450	TRINITY_DN23256_c0_g1_i1.path1	novel.1245	TRINITY_DN6342_c0_g1_i1.path1
TRINITY_DN53999_c0_g1_i1.path1	Pepsico1_Contig37847.path1	novel.8142	TRINITY_DN7072_c7_g1_i1.path1	novel.6927
novel.3302	novel.5640	novel.4790	novel.5092	TRINITY_DN28069_c0_g1_i5.path1
TRINITY_DN9494_c0_g1_i2.path1	TRINITY_DN9693_c0_g1_i7.path1	novel.3210	TRINITY_DN82762_c0_g1_i1.path1	novel.9373
TRINITY_DN10467_c0_g1_i3.path1	novel.3198	TRINITY_DN10664_c1_g6_i1.path1	TRINITY_DN10905_c0_g1_i6.path2	Pepsico2_Contig9973.path1
novel.10371	TRINITY_DN38303_c0_g1_i2.path1	novel.10187	TRINITY_DN78715_c0_g1_i1.path1	TRINITY_DN10081_c0_g1_i2.path1
Pepsico2_Contig3578.path2	novel.79	novel.3221	TRINITY_DN34497_c1_g1_i1.path3	TRINITY_DN8862_c2_g1_i8.path2
TRINITY_DN7772_c0_g1_i4.path1	TRINITY_DN98933_c0_g1_i1.path1	TRINITY_DN4092_c0_g1_i3.path2	TRINITY_DN15073_c0_g1_i2.path1	TRINITY_DN2854_c0_g1_i1.path1
TRINITY_DN89105_c0_g1_i1.path1	Pepsico2_Contig17102.path1	novel.7884	novel.8	novel.6225
novel.6730	TRINITY_DN7355_c0_g1_i2.path2	novel.3786	TRINITY_DN19177_c0_g1_i1.path1	novel.9991
TRINITY_DN3601_c0_g1_i1.path2	Pepsico2_Contig2180.path1	novel.1488	novel.7138	Pepsico2_Contig9200.path1
TRINITY_DN8471_c0_g1_i4.path1	TRINITY_DN9385_c2_g1_i1.path1	TRINITY_DN7355_c0_g1_i2.path2	Pepsico1_Contig37386.path1	TRINITY_DN7242_c0_g2_i1.path1
novel.8016	novel.1491	novel.6928	TRINITY_DN11478_c0_g1_i4.path2	novel.8016
novel.3210	Pepsico2_Contig5219.path1	TRINITY_DN12320_c0_g1_i2.path1	novel.1491	novel.473
novel.1491	TRINITY_DN6342_c0_g1_i1.path1	TRINITY_DN25005_c0_g1_i1.path1	TRINITY_DN8445_c0_g1_i4.path2	TRINITY_DN25777_c0_g1_i1.path2
Pepsico1_Contig33914.path1	novel.4815	novel.6355	novel.2456	TRINITY_DN7355_c0_g1_i2.path2
TRINITY_DN8494_c1_g2_i1.path1	novel.3221	TRINITY_DN21549_c0_g1_i1.path1	novel.7120	novel.4836
Pepsico2_Contig9370.path1	TRINITY_DN7068_c0_g1_i5.path1	TRINITY_DN14890_c0_g3_i1.path1	TRINITY_DN16546_c0_g1_i4.path1	Pepsico2_Contig14570.path1
TRINITY_DN5199_c0_g2_i1.path2	TRINITY_DN50046_c0_g1_i1.path1	novel.6225	TRINITY_DN13908_c0_g4_i1.path1	TRINITY_DN30361_c0_g1_i2.path1
Pepsico1_Contig1180.path1	novel.6225	novel.4196	TRINITY_DN26301_c0_g1_i2.path1	TRINITY_DN17932_c0_g2_i5.path2
novel.10179	TRINITY_DN23242_c0_g2_i5.path1	novel.79	TRINITY_DN12040_c0_g1_i15.path2	Pepsico2_Contig20289.path1
Pepsico1_Contig36309.path2	TRINITY_DN7311_c0_g1_i1.path1	novel.5933	novel.4772	TRINITY_DN78715_c0_g1_i1.path1
Pepsico1_Contig1188.path2	TRINITY_DN15969_c0_g1_i3.path1	Pepsico2_Contig17466.path1	TRINITY_DN22077_c0_g1_i12.path2	TRINITY_DN43074_c0_g1_i1.path1
novel.2441	novel.6343	Pepsico2_Contig8462.path1	TRINITY_DN16355_c0_g1_i5.path1	TRINITY_DN19029_c0_g1_i1.path1
TRINITY_DN22689_c0_g1_i1.path1	TRINITY_DN14890_c0_g3_i1.path1	TRINITY_DN9007_c0_g1_i2.path1	TRINITY_DN19898_c0_g5_i2.path1	TRINITY_DN7072_c7_g1_i1.path1
Pepsico1_Contig1181.path2	Pepsico2_Contig7935.path1	novel.5670	novel.2272	novel.7923
Pepsico1_Contig38.path2	novel.3205	TRINITY_DN25461_c0_g1_i1.path1	Pepsico2_Contig3409.path1	novel.2272
novel.6041	novel.4196	TRINITY_DN21357_c0_g1_i1.path1	novel.7923	TRINITY_DN1167_c0_g2_i1.path1
novel.1449	Pepsico2_Contig13314.path1	novel.7120	TRINITY_DN98933_c0_g1_i1.path1	TRINITY_DN38115_c0_g1_i1.path1
TRINITY_DN35061_c1_g1_i2.path1	TRINITY_DN21549_c0_g1_i1.path1	novel.6937	TRINITY_DN23337_c0_g1_i1.path1	TRINITY_DN13349_c0_g1_i9.path1
TRINITY_DN8596_c4_g1_i1.path1	novel.3694	TRINITY_DN215_c0_g4_i1.path1	TRINITY_DN8484_c0_g4_i1.path1	TRINITY_DN38137_c0_g1_i1.path1
novel.7158	TRINITY_DN1968_c0_g1_i4.path1	TRINITY_DN53548_c0_g1_i1.path1	TRINITY_DN7127_c0_g2_i6.path2	Pepsico2_Contig10882.path2
Pepsico2_Contig14708.path1	TRINITY_DN10891_c0_g1_i1.path3	novel.8920	novel.354	novel.1702
TRINITY_DN28069_c0_g1_i5.path1	TRINITY_DN7993_c0_g1_i8.path1	TRINITY_DN6342_c0_g1_i1.path1	TRINITY_DN25005_c0_g1_i1.path1	novel.8536
TRINITY_DN53548_c0_g1_i1.path1	TRINITY_DN1040_c0_g1_i1.path1	novel.2272	novel.10447	novel.5932
TRINITY_DN61322_c0_g1_i1.path1	TRINITY_DN26454_c0_g1_i1.path3	Pepsico2_Contig2484.path1	Pepsico2_Contig4927.path1	novel.6343
novel.8142	Pepsico2_Contig2408.path3	Pepsico2_Contig16302.path2	TRINITY_DN23390_c0_g1_i1.path1	TRINITY_DN8469_c0_g1_i11.path1
TRINITY_DN45056_c0_g2_i1.path1	TRINITY_DN8469_c0_g1_i11.path1	novel.4103	novel.7503	TRINITY_DN13385_c1_g1_i3.path1
novel.4835	novel.3762	novel.1186	Pepsico2_Contig12871.path3	novel.8672
novel.5885	TRINITY_DN9386_c0_g1_i5.path1	novel.10447	TRINITY_DN13624_c0_g1_i5.path1	Pepsico2_Contig19535.path1
TRINITY_DN6501_c0_g1_i1.path1	TRINITY_DN8939_c0_g1_i1.path1	Pepsico2_Contig10938.path2	Pepsico2_Contig2180.path1	Pepsico2_Contig16302.path2
novel.1717	TRINITY_DN10664_c1_g6_i1.path1	TRINITY_DN37195_c0_g1_i7.path1	novel.6225	novel.9787
novel.10047	novel.566	TRINITY_DN20226_c0_g1_i3.path1	novel.4815	novel.3941
novel.3206	novel.6341	TRINITY_DN4449_c0_g3_i2.path2	Pepsico2_Contig19460.path2	TRINITY_DN7127_c0_g2_i6.path2
novel.4532	novel.4538	TRINITY_DN11760_c0_g1_i2.path1	novel.1186	TRINITY_DN25055_c0_g1_i1.path1
Pepsico1_Contig5656.path1	Pepsico1_Contig37386.path1	TRINITY_DN11869_c0_g1_i1.path1	TRINITY_DN98417_c0_g1_i1.path1	Pepsico2_Contig9614.path3
TRINITY_DN30461_c0_g1_i14.path1	TRINITY_DN10416_c0_g2_i1.path1	TRINITY_DN5174_c1_g1_i2.path1	novel.3206	TRINITY_DN11785_c1_g1_i1.path1
TRINITY_DN15969_c0_g1_i3.path1	novel.10447	novel.8016	novel.5390	novel.5933
novel.5670	novel.7833	Pepsico2_Contig10882.path2	Pepsico2_Contig12299.path1	TRINITY_DN7084_c0_g1_i3.path1
novel.5267	novel.620	TRINITY_DN8849_c1_g1_i7.path1	TRINITY_DN16825_c0_g1_i7.path1	TRINITY_DN6573_c0_g1_i4.path1
novel.1488	novel.4448	TRINITY_DN43686_c0_g1_i1.path1	novel.6992	novel.7507
novel.7336	TRINITY_DN9007_c0_g1_i2.path1	TRINITY_DN9737_c2_g1_i1.path1	Pepsico2_Contig16720.path1	novel.2456
novel.9371	novel.29	novel.9827	Pepsico2_Contig2484.path1	TRINITY_DN45056_c0_g2_i1.path1
TRINITY_DN29706_c0_g2_i2.path1	novel.4680	TRINITY_DN8639_c0_g2_i1.path3	Pepsico2_Contig12326.path2	Pepsico2_Contig7319.path1
novel.2956	TRINITY_DN20313_c0_g1_i6.path3	novel.7301	TRINITY_DN21044_c2_g1_i1.path4	TRINITY_DN6228_c0_g3_i1.path1
TRINITY_DN10812_c0_g1_i2.path1	Pepsico2_Contig2036.path2	Pepsico2_Contig4411.path1	TRINITY_DN11938_c0_g1_i1.path1	Pepsico1_Contig34834.path3
TRINITY_DN4954_c0_g2_i1.path1	novel.1365	TRINITY_DN7242_c0_g2_i1.path1	Pepsico1_Contig34834.path3	Pepsico2_Contig5323.path1
novel.2272	novel.3834	TRINITY_DN8596_c4_g1_i1.path1	novel.1275	TRINITY_DN37195_c0_g1_i7.path1
novel.6170	Pepsico2_Contig19816.path1	TRINITY_DN16355_c0_g1_i5.path1	Pepsico2_Contig7452.path1	novel.10087
novel.2137	novel.9676	Pepsico1_Contig37847.path1	TRINITY_DN4515_c0_g1_i17.path1	TRINITY_DN37160_c0_g1_i1.path1
TRINITY_DN14890_c0_g3_i1.path1	novel.1736	novel.7132	novel.6949	Pepsico2_Contig6725.path2
TRINITY_DN4261_c0_g1_i2.path1	TRINITY_DN4954_c0_g2_i1.path1	TRINITY_DN4261_c0_g1_i2.path1	novel.1477	novel.7695
Pepsico2_Contig15229.path2	TRINITY_DN35061_c1_g1_i2.path1	TRINITY_DN111530_c0_g1_i1.path2	novel.6006	Pepsico2_Contig17466.path1
novel.3190	Pepsico2_Contig20778.path1	novel.8962	novel.1974	novel.5911
TRINITY_DN215_c0_g4_i1.path1	TRINITY_DN29706_c0_g2_i2.path1	TRINITY_DN17932_c0_g2_i5.path2	Pepsico1_Contig1188.path2	Pepsico1_Contig5951.path2
novel.9353	TRINITY_DN21116_c0_g1_i2.path1	TRINITY_DN3601_c0_g1_i1.path2	novel.5670	novel.2682
TRINITY_DN7472_c0_g1_i1.path1	novel.1488	novel.8929	novel.6402	novel.1488
TRINITY_DN10664_c1_g6_i1.path1	novel.8218	novel.3941	TRINITY_DN4515_c0_g1_i17.path2	novel.1806
novel.1186	novel.8827	novel.1381	TRINITY_DN11195_c1_g1_i1.path2	TRINITY_DN7993_c0_g1_i8.path1
TRINITY_DN15616_c0_g1_i5.path3	novel.3206	novel.6098	novel.7424	novel.8632
TRINITY_DN99656_c0_g1_i1.path1	novel.3437	novel.2966	TRINITY_DN6501_c0_g1_i1.path1	novel.6041
TRINITY_DN17932_c0_g2_i5.path2	novel.347	Pepsico2_Contig16486.path1	TRINITY_DN29983_c0_g1_i2.path1	Pepsico1_Contig2462.path1
TRINITY_DN10891_c0_g1_i1.path3	Pepsico2_Contig10040.path1	novel.10326	novel.5137	novel.3302
novel.6165	TRINITY_DN10477_c1_g1_i6.path2	Pepsico2_Contig12871.path3	TRINITY_DN24307_c0_g1_i1.path1	TRINITY_DN33725_c0_g1_i2.path1
novel.3664	novel.2272	novel.10525	Pepsico1_Contig32360.path1	TRINITY_DN12913_c0_g3_i1.path1
novel.6191	Pepsico2_Contig12767.path1	novel.6941	novel.3786	TRINITY_DN7242_c0_g1_i2.path1
novel.6402	TRINITY_DN1567_c0_g1_i5.path1	TRINITY_DN15645_c1_g1_i8.path1	TRINITY_DN931_c0_g2_i2.path1	novel.2539
novel.680	TRINITY_DN215_c0_g4_i1.path1	TRINITY_DN79972_c0_g1_i1.path1	TRINITY_DN8862_c2_g1_i8.path2	novel.10561
TRINITY_DN9737_c2_g1_i1.path1	TRINITY_DN69_c1_g2_i2.path1	TRINITY_DN31207_c0_g1_i1.path1	Pepsico2_Contig10882.path2	novel.5523
novel.2142	Pepsico1_Contig34834.path3	TRINITY_DN1019_c0_g2_i1.path2	TRINITY_DN31113_c0_g3_i2.path1	novel.7286
TRINITY_DN45877_c0_g1_i1.path1	TRINITY_DN32665_c0_g1_i1.path1	TRINITY_DN106297_c0_g1_i1.path1	Pepsico2_Contig16302.path2	TRINITY_DN6565_c0_g1_i3.path1
novel.10447	TRINITY_DN6501_c0_g1_i1.path1	TRINITY_DN32665_c0_g1_i1.path1	novel.9787	novel.3786
novel.2966	novel.10326	TRINITY_DN98933_c0_g1_i1.path1	TRINITY_DN31623_c1_g1_i1.path1	novel.1717
Pepsico2_Contig4524.path1	novel.5556	TRINITY_DN4225_c0_g1_i11.path1	TRINITY_DN12145_c0_g1_i1.path1	novel.3040
TRINITY_DN32750_c1_g1_i7.path1	novel.6191	novel.6402	novel.1736	TRINITY_DN25777_c0_g1_i1.path4
novel.2589	TRINITY_DN8704_c0_g1_i2.path1	TRINITY_DN18240_c0_g3_i1.path1	TRINITY_DN3394_c1_g2_i1.path1	Pepsico2_Contig16832.path1
TRINITY_DN20313_c0_g1_i6.path3	Pepsico2_Contig10882.path2	TRINITY_DN40642_c0_g1_i1.path3	novel.1576	Pepsico1_Contig1180.path1
novel.2456	novel.6375	TRINITY_DN8704_c0_g1_i2.path1	TRINITY_DN3601_c0_g1_i1.path2	Pepsico2_Contig16486.path1
novel.4765	novel.8743	TRINITY_DN34912_c0_g1_i2.path1	TRINITY_DN28069_c0_g1_i5.path1	novel.3190
novel.7695	Pepsico2_Contig10938.path2	TRINITY_DN22689_c0_g1_i1.path1	TRINITY_DN89105_c0_g1_i1.path1	TRINITY_DN17545_c0_g1_i1.path1
TRINITY_DN5536_c1_g1_i4.path2	novel.7132	TRINITY_DN1258_c0_g4_i2.path1	TRINITY_DN7242_c0_g2_i1.path1	novel.8740
TRINITY_DN8704_c0_g1_i2.path1	TRINITY_DN8471_c0_g1_i4.path1	novel.6517	novel.6080	novel.6220
novel.8314	TRINITY_DN17463_c0_g1_i3.path1	TRINITY_DN8471_c0_g2_i2.path1	TRINITY_DN22689_c0_g1_i1.path1	TRINITY_DN14211_c0_g1_i3.path1
TRINITY_DN6342_c0_g1_i1.path1	Pepsico2_Contig20590.path1	Pepsico2_Contig3409.path1	novel.994	TRINITY_DN31076_c0_g1_i4.path1
novel.6355	TRINITY_DN37195_c0_g1_i7.path1	Pepsico1_Contig6150.path1	TRINITY_DN19732_c1_g1_i2.path1	novel.7424
novel.1795	TRINITY_DN111530_c0_g1_i1.path2	novel.4500	novel.10525	TRINITY_DN22689_c0_g1_i1.path1
novel.6138	TRINITY_DN556_c0_g1_i1.path3	novel.3302	novel.8079	novel.8810
novel.9991	novel.6527	TRINITY_DN20215_c0_g1_i3.path1	novel.10201	TRINITY_DN18185_c0_g1_i6.path1
Pepsico1_Contig5655.path1	TRINITY_DN28719_c0_g4_i1.path1	TRINITY_DN19880_c0_g1_i1.path1	Pepsico1_Contig1180.path1	Pepsico1_Contig37847.path1
novel.7886	novel.1186	Pepsico2_Contig14708.path1	Pepsico2_Contig337.path1	novel.7326
TRINITY_DN30714_c0_g1_i2.path1	novel.5862	novel.4785	novel.7098	Pepsico1_Contig3100.path2
TRINITY_DN1040_c0_g1_i1.path1	Pepsico2_Contig20227.path2	TRINITY_DN10416_c0_g2_i1.path1	Pepsico1_Contig421.path1	novel.877
TRINITY_DN11600_c0_g1_i1.path1	Pepsico2_Contig6725.path2	TRINITY_DN71109_c0_g1_i1.path2	novel.6355	TRINITY_DN20131_c0_g1_i4.path1
novel.8743	novel.3302	TRINITY_DN21044_c2_g1_i1.path4	TRINITY_DN4261_c0_g1_i2.path1	novel.1795
novel.10525	novel.1239	TRINITY_DN15969_c0_g1_i3.path1	Pepsico1_Contig3957.path1	TRINITY_DN26301_c0_g1_i2.path1
TRINITY_DN47515_c0_g1_i2.path1	TRINITY_DN12171_c0_g1_i7.path2	novel.2845	Pepsico1_Contig7763.path1	TRINITY_DN10664_c1_g6_i1.path1
novel.566	Pepsico2_Contig3409.path1	TRINITY_DN81975_c0_g1_i1.path1	TRINITY_DN25777_c0_g1_i1.path2	TRINITY_DN64836_c0_g1_i1.path1
Pepsico2_Contig9474.path1	TRINITY_DN55735_c1_g1_i1.path1	TRINITY_DN29706_c0_g2_i2.path1	Pepsico1_Contig6507.path1	novel.4761
TRINITY_DN13621_c0_g1_i1.path1	novel.7772	novel.7500	TRINITY_DN10815_c0_g1_i1.path1	novel.6355
novel.4785	Pepsico2_Contig4927.path1	TRINITY_DN32750_c1_g1_i7.path1	novel.5911	novel.1708
TRINITY_DN21149_c0_g3_i1.path1	TRINITY_DN8596_c4_g1_i1.path1	novel.774	TRINITY_DN215_c0_g4_i1.path1	TRINITY_DN18254_c0_g1_i1.path1
TRINITY_DN111530_c0_g1_i1.path2	novel.5878	novel.347	novel.3198	novel.1736
novel.5970	TRINITY_DN89105_c0_g1_i1.path1	TRINITY_DN69_c2_g1_i1.path1	novel.1381	TRINITY_DN25751_c0_g1_i2.path1
novel.6923	TRINITY_DN71109_c0_g1_i1.path2	Pepsico2_Contig20289.path1	TRINITY_DN8471_c0_g2_i2.path1	novel.7113
novel.7884	TRINITY_DN18513_c0_g1_i1.path1	TRINITY_DN78715_c0_g1_i1.path1	novel.5849	novel.392
TRINITY_DN8925_c0_g1_i1.path1	novel.2823	TRINITY_DN98417_c0_g1_i1.path1	novel.5878	Pepsico2_Contig13314.path1
TRINITY_DN10837_c0_g1_i1.path1	novel.3682	novel.5	Pepsico1_Contig2723.path1	Pepsico2_Contig7708.path1
TRINITY_DN9920_c0_g1_i11.path1	Pepsico2_Contig20617.path1	novel.1245	TRINITY_DN12320_c0_g1_i2.path1	novel.5970
TRINITY_DN27142_c0_g2_i1.path1	TRINITY_DN98417_c0_g1_i1.path1	Pepsico1_Contig33914.path1	TRINITY_DN7355_c0_g1_i2.path2	TRINITY_DN87460_c0_g1_i1.path1
novel.2962	novel.9793	Pepsico2_Contig17314.path1	Pepsico2_Contig14708.path1	TRINITY_DN28605_c0_g3_i3.path1
novel.9787	novel.7884	novel.5330	Pepsico1_Contig5775.path1	TRINITY_DN53621_c0_g1_i1.path1
TRINITY_DN98933_c0_g1_i1.path1	novel.5	novel.5849	TRINITY_DN6342_c0_g1_i1.path1	TRINITY_DN9509_c0_g1_i4.path1
TRINITY_DN2585_c2_g1_i1.path2	TRINITY_DN88081_c0_g1_i1.path1	TRINITY_DN69_c1_g2_i2.path1	novel.9699	Pepsico2_Contig10529.path2
novel.2155	novel.4785	TRINITY_DN16546_c0_g1_i4.path1	novel.7944	TRINITY_DN75397_c0_g1_i1.path1
TRINITY_DN27677_c0_g1_i2.path1	TRINITY_DN6228_c0_g3_i1.path1	novel.10201	TRINITY_DN17932_c0_g2_i5.path2	Pepsico1_Contig5775.path1
TRINITY_DN14238_c1_g1_i1.path1	TRINITY_DN75269_c0_g1_i1.path1	TRINITY_DN12171_c0_g1_i7.path2	TRINITY_DN26530_c1_g1_i1.path2	TRINITY_DN69_c2_g1_i1.path1
novel.9391	novel.10032	novel.6159	novel.5885	TRINITY_DN2567_c0_g1_i1.path1
novel.3378	novel.3664	novel.473	novel.4448	novel.6224
Pepsico1_Contig5677.path1	TRINITY_DN12145_c0_g1_i1.path1	TRINITY_DN8484_c0_g4_i1.path1	novel.1702	TRINITY_DN14583_c0_g1_i3.path1
novel.240	TRINITY_DN20226_c0_g1_i3.path1	novel.392	Pepsico1_Contig37847.path1	Pepsico1_Contig3978.path1
TRINITY_DN49221_c0_g1_i1.path1	novel.1115	TRINITY_DN31855_c0_g1_i2.path2	novel.8962	novel.8831
TRINITY_DN20215_c0_g1_i3.path1	Pepsico2_Contig16486.path1	novel.6191	Pepsico2_Contig16813.path2	TRINITY_DN29706_c0_g2_i2.path1
novel.210	novel.9027	TRINITY_DN31113_c0_g3_i2.path1	Pepsico2_Contig2408.path3	novel.354
TRINITY_DN25489_c0_g1_i1.path1	Pepsico2_Contig12140.path1	Pepsico2_Contig363.path1	novel.3302	novel.10187
novel.7424	TRINITY_DN10891_c1_g1_i1.path2	novel.29	TRINITY_DN8704_c0_g1_i2.path1	TRINITY_DN31256_c0_g1_i1.path1
novel.9349	novel.4500	Pepsico2_Contig17265.path1	TRINITY_DN1019_c0_g2_i1.path2	TRINITY_DN13996_c0_g1_i2.path1
novel.4244	Pepsico2_Contig19697.path1	TRINITY_DN4532_c0_g1_i4.path2	novel.79	Pepsico1_Contig33914.path1
Pepsico2_Contig2548.path1	novel.5970	novel.6992	TRINITY_DN4769_c0_g1_i5.path2	TRINITY_DN9776_c0_g1_i9.path2
Pepsico2_Contig18303.path1	Pepsico2_Contig16947.path2	novel.5020	novel.1717	TRINITY_DN215_c0_g4_i1.path1
novel.10308	novel.5267	Pepsico1_Contig415.path1	Pepsico2_Contig6725.path2	TRINITY_DN27607_c0_g1_i10.path1
Pepsico2_Contig1053.path2	novel.3378	TRINITY_DN8471_c0_g1_i4.path1	TRINITY_DN1502_c0_g1_i2.path1	TRINITY_DN8704_c0_g1_i2.path1
Pepsico2_Contig12255.path1	TRINITY_DN27677_c0_g1_i2.path1	TRINITY_DN26107_c0_g1_i2.path1	novel.7121	TRINITY_DN4954_c0_g2_i1.path2
novel.4458	novel.5911	novel.5911	TRINITY_DN10654_c0_g3_i2.path1	TRINITY_DN4261_c0_g1_i2.path1
novel.347	TRINITY_DN26107_c0_g1_i2.path1	Pepsico1_Contig5775.path1	TRINITY_DN7993_c0_g1_i8.path1	TRINITY_DN32750_c1_g1_i7.path1
TRINITY_DN24_c2_g1_i1.path1	TRINITY_DN11869_c0_g1_i1.path1	TRINITY_DN12218_c0_g1_i4.path2	Pepsico1_Contig4650.path1	TRINITY_DN10812_c0_g1_i2.path1
novel.4538	Pepsico2_Contig16834.path1	TRINITY_DN25777_c0_g1_i1.path2	TRINITY_DN45056_c0_g2_i1.path1	TRINITY_DN69304_c0_g1_i1.path1
TRINITY_DN6439_c0_g1_i1.path2	novel.6080	novel.3040	novel.1488	TRINITY_DN10905_c0_g1_i6.path2
TRINITY_DN8639_c0_g2_i1.path3	novel.5330	Pepsico2_Contig20783.path1	novel.6141	TRINITY_DN9920_c0_g1_i11.path1
novel.4774	TRINITY_DN10081_c0_g1_i2.path1	novel.6037	TRINITY_DN52949_c0_g1_i1.path1	novel.10078
TRINITY_DN11869_c0_g1_i1.path1	TRINITY_DN34497_c1_g1_i1.path3	novel.9015	novel.6224	novel.8652
novel.9793	TRINITY_DN19029_c0_g1_i1.path1	novel.6231	Pepsico2_Contig17466.path1	Pepsico2_Contig12871.path3
Pepsico2_Contig13314.path1	Pepsico2_Contig12299.path1	TRINITY_DN31623_c1_g1_i1.path1	TRINITY_DN23152_c0_g1_i1.path1	Pepsico2_Contig2978.path2
novel.3651	TRINITY_DN7934_c2_g1_i7.path1	novel.2591	TRINITY_DN13168_c0_g1_i1.path1	novel.4967
novel.10531	novel.8314	novel.5878	TRINITY_DN8469_c0_g1_i11.path1	TRINITY_DN9007_c0_g1_i2.path1
novel.1672	TRINITY_DN21044_c2_g1_i1.path4	novel.4967	Pepsico1_Contig33914.path1	TRINITY_DN9737_c2_g1_i1.path1
TRINITY_DN6228_c0_g3_i1.path1	novel.12	Pepsico2_Contig5323.path1	Pepsico2_Contig9970.path1	novel.10177
Pepsico2_Contig7839.path1	novel.9674	novel.6045	TRINITY_DN20226_c0_g1_i3.path1	Pepsico1_Contig7725.path1
TRINITY_DN18513_c0_g1_i1.path1	novel.774	Pepsico2_Contig12952.path2	TRINITY_DN12383_c0_g1_i2.path1	TRINITY_DN97436_c0_g1_i1.path1
TRINITY_DN13996_c0_g1_i2.path1	novel.2956	TRINITY_DN102507_c0_g1_i1.path1	Pepsico2_Contig16486.path1	novel.3198
Pepsico2_Contig20289.path1	Pepsico2_Contig12871.path3	TRINITY_DN33725_c0_g1_i2.path1	novel.10329	Pepsico2_Contig8385.path1
Pepsico2_Contig14292.path1	novel.9707	TRINITY_DN12145_c0_g1_i1.path1	novel.9393	Pepsico1_Contig865.path1
novel.7121	TRINITY_DN10891_c1_g1_i1.path1	TRINITY_DN17687_c0_g2_i2.path1	TRINITY_DN8648_c0_g1_i4.path2	Pepsico2_Contig10700.path1
TRINITY_DN7691_c0_g1_i1.path2	novel.2962	Pepsico2_Contig14022.path1	TRINITY_DN225_c2_g1_i11.path1	TRINITY_DN18286_c0_g1_i1.path2
novel.9360	novel.10179	novel.8672	Pepsico2_Contig5323.path1	TRINITY_DN7614_c1_g2_i1.path1
TRINITY_DN7934_c2_g1_i7.path1	novel.5969	TRINITY_DN8469_c0_g1_i11.path1	Pepsico2_Contig2978.path1	TRINITY_DN12086_c0_g2_i2.path1
TRINITY_DN9509_c0_g1_i4.path1	TRINITY_DN18240_c0_g3_i1.path1	novel.6930	novel.473	TRINITY_DN931_c0_g2_i2.path1
novel.8514	novel.6517	TRINITY_DN11195_c1_g1_i1.path2	novel.1806	TRINITY_DN13217_c0_g1_i1.path3
TRINITY_DN12386_c0_g2_i1.path1	TRINITY_DN4789_c0_g1_i1.path3	TRINITY_DN46999_c0_g1_i1.path1	novel.1239	TRINITY_DN42926_c0_g1_i1.path1
Pepsico2_Contig19697.path1	TRINITY_DN44840_c1_g1_i1.path5	novel.7503	novel.7500	TRINITY_DN10595_c0_g2_i2.path2
novel.10349	novel.6720	novel.6157	novel.8016	novel.5556
novel.5969	novel.2966	novel.6183	novel.3253	TRINITY_DN33640_c0_g1_i1.path1
TRINITY_DN12408_c0_g2_i2.path1	novel.5849	TRINITY_DN69132_c0_g1_i1.path1	novel.8142	TRINITY_DN7279_c0_g3_i1.path1
novel.12	novel.7823	TRINITY_DN10891_c1_g1_i1.path2	TRINITY_DN81975_c0_g1_i1.path1	novel.3664
novel.10326	Pepsico2_Contig4571.path1	TRINITY_DN26591_c0_g1_i1.path1	novel.8672	TRINITY_DN105250_c0_g1_i1.path1
TRINITY_DN20153_c1_g1_i1.path1	novel.2291	Pepsico2_Contig19444.path1	novel.5330	TRINITY_DN26562_c0_g1_i1.path1
TRINITY_DN22030_c0_g1_i4.path1	novel.1477	TRINITY_DN7242_c0_g1_i2.path1	TRINITY_DN88081_c0_g1_i1.path1	Pepsico1_Contig5499.path1
novel.7516	TRINITY_DN18286_c0_g1_i1.path2	novel.2959	TRINITY_DN35396_c0_g1_i2.path2	Pepsico1_Contig32360.path1
novel.7847	TRINITY_DN20215_c0_g1_i3.path1	TRINITY_DN49221_c0_g1_i1.path1	TRINITY_DN23256_c0_g1_i1.path1	TRINITY_DN29283_c0_g1_i1.path2
TRINITY_DN10718_c0_g4_i1.path1	novel.9528	TRINITY_DN9693_c0_g1_i7.path1	TRINITY_DN18254_c0_g1_i1.path1	novel.5673
novel.4191	TRINITY_DN26591_c0_g1_i1.path1	novel.9393	novel.5020	TRINITY_DN10979_c0_g2_i8.path1
TRINITY_DN111692_c0_g1_i1.path1	novel.7847	novel.6323	TRINITY_DN4027_c0_g5_i1.path2	TRINITY_DN19404_c0_g1_i1.path1
novel.4448	novel.1527	TRINITY_DN9637_c0_g1_i4.path1	novel.9676	TRINITY_DN17789_c0_g1_i2.path3
novel.9384	Pepsico2_Contig6644.path1	TRINITY_DN28719_c0_g4_i1.path1	TRINITY_DN31207_c0_g1_i1.path1	TRINITY_DN54399_c0_g1_i1.path2
TRINITY_DN15509_c1_g1_i2.path1	Pepsico2_Contig6259.path1	TRINITY_DN12964_c1_g1_i1.path1	TRINITY_DN68113_c0_g1_i1.path1	TRINITY_DN22391_c0_g1_i2.path1
TRINITY_DN1567_c0_g1_i5.path1	TRINITY_DN33725_c0_g1_i2.path1	novel.4542	TRINITY_DN69_c2_g1_i1.path1	TRINITY_DN24832_c0_g3_i1.path1
novel.2953	TRINITY_DN8587_c1_g1_i1.path1	novel.5850	TRINITY_DN106297_c0_g1_i1.path1	TRINITY_DN74032_c0_g1_i1.path2
TRINITY_DN2657_c0_g1_i2.path1	TRINITY_DN22391_c0_g1_i2.path1	novel.8743	TRINITY_DN42926_c0_g1_i1.path1	novel.8823
novel.857	novel.4244	Pepsico1_Contig28299.path1	novel.392	TRINITY_DN12386_c0_g2_i1.path1
novel.3682	novel.6653	TRINITY_DN18286_c0_g1_i1.path2	TRINITY_DN57903_c0_g2_i1.path5	novel.3595
TRINITY_DN8862_c2_g1_i8.path2	Pepsico1_Contig37863.path1	novel.8652	TRINITY_DN33567_c0_g1_i1.path2	novel.3651
Pepsico2_Contig7708.path1	TRINITY_DN12381_c0_g2_i1.path1	novel.2956	Pepsico2_Contig20289.path1	TRINITY_DN111530_c0_g1_i1.path2
TRINITY_DN29573_c0_g1_i8.path1	Pepsico2_Contig1053.path2	novel.10078	TRINITY_DN33640_c0_g1_i1.path1	Pepsico2_Contig8532.path1
novel.6159	Pepsico2_Contig5323.path1	novel.3682	TRINITY_DN29706_c0_g2_i2.path1	TRINITY_DN35396_c0_g1_i2.path2
novel.7300	novel.10329	novel.5673	TRINITY_DN4942_c0_g1_i2.path1	TRINITY_DN2548_c0_g1_i5.path1
TRINITY_DN7335_c0_g1_i7.path1	TRINITY_DN79972_c0_g1_i1.path1	TRINITY_DN11608_c2_g1_i1.path1	TRINITY_DN15509_c1_g1_i2.path1	novel.7833
TRINITY_DN73349_c0_g1_i1.path1	novel.5670	novel.3834	TRINITY_DN7797_c0_g1_i2.path1	TRINITY_DN59745_c0_g1_i1.path1
novel.979	novel.6045	novel.9698	novel.5932	novel.8743
novel.5974	Pepsico2_Contig19114.path1	TRINITY_DN13996_c0_g1_i2.path1	TRINITY_DN13349_c0_g1_i9.path1	Pepsico2_Contig19460.path2
Pepsico2_Contig20286.path2	TRINITY_DN69825_c0_g1_i1.path1	Pepsico1_Contig36864.path2	TRINITY_DN59954_c0_g1_i3.path1	novel.3253
Pepsico2_Contig19268.path1	Pepsico1_Contig33914.path1	novel.2142	TRINITY_DN582_c2_g1_i6.path1	Pepsico2_Contig4524.path1
TRINITY_DN10437_c0_g1_i2.path1	TRINITY_DN13996_c0_g1_i2.path1	novel.386	TRINITY_DN30461_c0_g1_i14.path1	TRINITY_DN33567_c0_g1_i1.path2
TRINITY_DN69132_c0_g1_i1.path1	novel.5900	novel.1795	novel.29	Pepsico2_Contig6644.path1
Pepsico1_Contig15322.path1	Pepsico1_Contig5775.path1	novel.3664	Pepsico1_Contig171.path1	novel.1535
novel.10078	novel.2441	novel.3762	TRINITY_DN2854_c0_g1_i1.path1	TRINITY_DN68790_c0_g1_i1.path1
Pepsico2_Contig11832.path1	TRINITY_DN30461_c0_g1_i14.path1	novel.5970	TRINITY_DN35061_c1_g1_i2.path1	TRINITY_DN29788_c0_g2_i1.path1
novel.386	Pepsico2_Contig19875.path1	TRINITY_DN40822_c0_g1_i1.path2	TRINITY_DN5987_c0_g1_i3.path1	novel.6527
novel.5	Pepsico2_Contig17265.path1	TRINITY_DN13294_c0_g1_i1.path1	novel.4470	Pepsico2_Contig20774.path2
novel.4772	TRINITY_DN8596_c0_g2_i1.path1	novel.1283	TRINITY_DN8494_c1_g2_i1.path1	TRINITY_DN29879_c0_g1_i4.path1
TRINITY_DN26591_c0_g1_i1.path1	Pepsico1_Contig4680.path1	TRINITY_DN22077_c0_g1_i12.path2	Pepsico1_Contig725.path2	novel.6098
TRINITY_DN7993_c0_g1_i8.path1	novel.1719	novel.9787	TRINITY_DN73289_c0_g1_i1.path1	Pepsico1_Contig33288.path1
TRINITY_DN26107_c0_g1_i2.path1	novel.5020	TRINITY_DN31456_c0_g2_i4.path2	TRINITY_DN4954_c0_g2_i1.path1	Pepsico1_Contig3957.path1
TRINITY_DN20200_c1_g1_i5.path5	TRINITY_DN11608_c2_g1_i1.path1	TRINITY_DN33567_c0_g1_i1.path2	novel.3434	TRINITY_DN57429_c0_g1_i1.path1
novel.9486	Pepsico2_Contig426.path1	TRINITY_DN79208_c0_g1_i1.path1	TRINITY_DN9737_c2_g1_i1.path1	TRINITY_DN9250_c1_g1_i1.path2
novel.1806	novel.8997	novel.9391	novel.3221	novel.9354
novel.5064	Pepsico2_Contig7319.path1	TRINITY_DN13624_c0_g1_i5.path1	TRINITY_DN17100_c0_g1_i12.path1	novel.9391
Pepsico2_Contig4571.path1	novel.9787	novel.6216	TRINITY_DN10891_c0_g1_i1.path3	TRINITY_DN19219_c0_g1_i1.path1
novel.5878	novel.7336	novel.4793	TRINITY_DN3174_c1_g1_i2.path1	novel.10042
Pepsico1_Contig4661.path1	TRINITY_DN6439_c0_g1_i1.path2	novel.6220	TRINITY_DN18286_c0_g1_i1.path2	Pepsico1_Contig3802.path1
TRINITY_DN12171_c0_g1_i7.path2	TRINITY_DN17932_c0_g2_i5.path2	TRINITY_DN35061_c1_g1_i2.path1	novel.7301	TRINITY_DN14427_c1_g1_i1.path1
Pepsico2_Contig14570.path1	TRINITY_DN7242_c0_g2_i1.path1	novel.9227	Pepsico1_Contig6150.path1	TRINITY_DN9250_c1_g1_i1.path1
TRINITY_DN27_c3_g1_i1.path1	novel.8928	Pepsico2_Contig5745.path1	novel.7229	novel.347
Pepsico2_Contig13697.path1	novel.386	Pepsico2_Contig14449.path1	Pepsico1_Contig7140.path1	TRINITY_DN5752_c0_g1_i1.path1
novel.4500	TRINITY_DN69132_c0_g1_i1.path1	TRINITY_DN10664_c1_g6_i1.path2	Pepsico2_Contig7319.path1	Pepsico1_Contig36309.path2
novel.8928	Pepsico1_Contig6150.path1	Pepsico2_Contig16986.path2	TRINITY_DN29573_c0_g1_i8.path1	TRINITY_DN1258_c0_g9_i1.path1
novel.6183	novel.3434	novel.210	Pepsico2_Contig10938.path2	TRINITY_DN26562_c0_g2_i1.path1
novel.6941	TRINITY_DN53548_c0_g1_i1.path1	TRINITY_DN11705_c0_g1_i1.path1	novel.6927	novel.7770
TRINITY_DN6230_c1_g1_i1.path1	novel.6183	Pepsico2_Contig18206.path2	TRINITY_DN85435_c0_g1_i1.path1	novel.5267
TRINITY_DN12145_c0_g1_i1.path1	TRINITY_DN2585_c2_g1_i1.path2	novel.3378	TRINITY_DN12758_c1_g1_i2.path1	TRINITY_DN6513_c0_g2_i1.path1
TRINITY_DN12218_c0_g1_i4.path2	TRINITY_DN11076_c0_g1_i1.path1	TRINITY_DN30461_c0_g1_i14.path1	novel.2682	novel.9393
novel.6220	novel.6356	TRINITY_DN89105_c0_g1_i1.path1	novel.7772	novel.4765
TRINITY_DN20226_c0_g1_i3.path1	TRINITY_DN26467_c0_g1_i1.path1	TRINITY_DN57903_c0_g2_i1.path5	novel.10536	Pepsico2_Contig13875.path1
TRINITY_DN15406_c0_g1_i1.path1	TRINITY_DN32553_c0_g1_i1.path1	Pepsico2_Contig3549.path1	novel.10234	TRINITY_DN92905_c0_g1_i1.path2
TRINITY_DN26078_c0_g1_i1.path1	novel.4470	novel.8997	TRINITY_DN21184_c0_g2_i1.path1	Pepsico1_Contig1795.path1
TRINITY_DN19850_c0_g1_i11.path2	novel.9353	Pepsico1_Contig34834.path3	novel.9627	novel.3221
TRINITY_DN14953_c0_g1_i3.path1	Pepsico1_Contig415.path1	Pepsico2_Contig19697.path1	TRINITY_DN8471_c0_g1_i4.path1	novel.67
TRINITY_DN81327_c0_g1_i1.path1	Pepsico2_Contig3010.path1	novel.8928	TRINITY_DN25777_c0_g1_i1.path4	Pepsico2_Contig8195.path2
novel.8207	TRINITY_DN31317_c1_g1_i2.path1	novel.2962	novel.2582	TRINITY_DN26115_c0_g2_i3.path1
novel.8827	TRINITY_DN32750_c1_g1_i7.path1	novel.3186	TRINITY_DN582_c2_g1_i6.path2	novel.9699
novel.1239	novel.4191	TRINITY_DN25384_c0_g1_i1.path1	TRINITY_DN26454_c0_g1_i1.path3	novel.5878
TRINITY_DN5491_c1_g5_i1.path1	Pepsico2_Contig5526.path1	TRINITY_DN6228_c0_g3_i1.path1	TRINITY_DN7614_c1_g2_i1.path1	novel.7299
TRINITY_DN13646_c0_g1_i1.path1	TRINITY_DN373_c0_g2_i8.path1	novel.9349	TRINITY_DN95630_c0_g1_i1.path1	TRINITY_DN12913_c0_g4_i1.path1
Pepsico2_Contig10882.path2	novel.5257	novel.566	Pepsico2_Contig17216.path1	novel.2648
novel.7842	novel.3190	novel.10308	Pepsico2_Contig12443.path1	novel.7506
Pepsico2_Contig9383.path2	Pepsico2_Contig3536.path1	novel.7695	Pepsico2_Contig9370.path1	TRINITY_DN17278_c1_g1_i1.path1
novel.4398	novel.6402	TRINITY_DN26074_c0_g1_i1.path1	novel.6341	novel.7949
Pepsico1_Contig32542.path1	TRINITY_DN12408_c0_g2_i2.path1	novel.1356	novel.8743	TRINITY_DN11076_c0_g1_i1.path2
novel.4196	Pepsico1_Contig38.path2	novel.10032	novel.9015	TRINITY_DN27142_c0_g2_i1.path1
novel.6216	TRINITY_DN5199_c0_g2_i1.path2	novel.403	novel.8997	novel.1224
TRINITY_DN11902_c0_g2_i2.path1	TRINITY_DN9971_c0_g1_i1.path1	novel.5257	novel.3210	TRINITY_DN3591_c0_g1_i2.path1
novel.392	Pepsico2_Contig20289.path1	TRINITY_DN5491_c1_g5_i1.path1	TRINITY_DN13385_c1_g1_i3.path1	Pepsico2_Contig2180.path1
TRINITY_DN79340_c0_g1_i1.path1	novel.6157	TRINITY_DN55735_c1_g1_i1.path1	novel.7695	novel.10326
TRINITY_DN109518_c0_g1_i1.path3	novel.4542	novel.1719	novel.1795	novel.1361
novel.29	novel.6159	TRINITY_DN20153_c1_g1_i1.path1	novel.1353	TRINITY_DN10416_c0_g2_i1.path1
TRINITY_DN97436_c0_g1_i1.path1	novel.375	TRINITY_DN13349_c0_g1_i9.path1	novel.7842	TRINITY_DN52949_c0_g1_i1.path1
novel.6649	novel.6216	TRINITY_DN97436_c0_g1_i1.path1	TRINITY_DN12086_c0_g2_i2.path1	TRINITY_DN9829_c0_g1_i3.path1
TRINITY_DN29057_c0_g1_i1.path1	TRINITY_DN102817_c0_g1_i1.path1	TRINITY_DN4789_c0_g1_i1.path3	Pepsico2_Contig4524.path1	novel.7165
TRINITY_DN16922_c0_g1_i1.path1	TRINITY_DN52949_c0_g1_i1.path1	novel.2808	TRINITY_DN11076_c0_g1_i1.path1	TRINITY_DN26107_c0_g1_i2.path1
TRINITY_DN114306_c0_g1_i1.path1	novel.6165	novel.979	TRINITY_DN9007_c0_g1_i2.path1	Pepsico1_Contig6150.path1
novel.6182	TRINITY_DN13591_c0_g1_i5.path1	TRINITY_DN27841_c0_g1_i1.path1	Pepsico2_Contig15659.path2	TRINITY_DN7797_c0_g1_i2.path1
novel.9392	TRINITY_DN5491_c1_g5_i1.path1	novel.6165	TRINITY_DN12218_c0_g1_i4.path2	TRINITY_DN12218_c0_g1_i4.path2
TRINITY_DN9250_c1_g1_i1.path1	Pepsico2_Contig9614.path3	novel.7097	TRINITY_DN31147_c0_g1_i1.path1	TRINITY_DN29732_c0_g1_i1.path1
TRINITY_DN8753_c0_g1_i3.path1	TRINITY_DN7335_c0_g1_i7.path1	novel.197	TRINITY_DN9309_c0_g1_i2.path1	TRINITY_DN1843_c0_g1_i4.path1
TRINITY_DN21706_c0_g1_i3.path2	TRINITY_DN27567_c0_g1_i1.path1	TRINITY_DN9971_c0_g1_i1.path1	TRINITY_DN18240_c0_g3_i1.path1	TRINITY_DN49221_c0_g1_i1.path1
Pepsico2_Contig17102.path1	novel.4835	TRINITY_DN6932_c0_g1_i3.path1	TRINITY_DN6573_c0_g1_i4.path1	TRINITY_DN32665_c0_g1_i1.path1
novel.1711	TRINITY_DN8969_c0_g1_i5.path2	TRINITY_DN9509_c0_g1_i4.path1	TRINITY_DN111530_c0_g1_i1.path2	novel.210
Pepsico2_Contig14330.path1	TRINITY_DN27067_c1_g1_i1.path1	TRINITY_DN43549_c0_g1_i1.path2	novel.2845	novel.79
TRINITY_DN3986_c0_g1_i1.path1	TRINITY_DN4261_c0_g1_i2.path1	TRINITY_DN7934_c2_g1_i7.path1	TRINITY_DN32750_c1_g1_i7.path1	TRINITY_DN29573_c0_g1_i8.path1
TRINITY_DN23242_c0_g2_i5.path1	novel.7719	TRINITY_DN9250_c1_g1_i1.path1	Pepsico1_Contig795.path1	novel.2966
TRINITY_DN4942_c0_g1_i2.path1	TRINITY_DN49221_c0_g1_i1.path1	novel.2441	novel.347	TRINITY_DN79673_c0_g1_i1.path1
TRINITY_DN34009_c0_g1_i1.path1	Pepsico2_Contig3417.path2	TRINITY_DN12408_c0_g2_i2.path1	TRINITY_DN14890_c0_g3_i1.path1	TRINITY_DN53548_c0_g1_i1.path1
TRINITY_DN6565_c0_g1_i3.path1	novel.4772	novel.5969	TRINITY_DN37339_c0_g1_i2.path1	TRINITY_DN30461_c0_g1_i14.path1
novel.8672	novel.8492	TRINITY_DN33640_c0_g3_i1.path1	Pepsico2_Contig1343.path2	Pepsico1_Contig6988.path1
TRINITY_DN14211_c0_g1_i3.path1	novel.51	novel.6472	novel.4790	TRINITY_DN43845_c0_g1_i13.path1
novel.774	Pepsico2_Contig4918.path1	novel.5267	novel.7199	novel.3560
Pepsico2_Contig8286.path1	novel.3040	novel.5862	TRINITY_DN33725_c0_g1_i2.path1	TRINITY_DN19203_c0_g1_i2.path1
Pepsico2_Contig11020.path1	Pepsico1_Contig28824.path2	TRINITY_DN12386_c0_g2_i1.path1	TRINITY_DN13591_c0_g1_i5.path1	TRINITY_DN4942_c0_g1_i2.path1
TRINITY_DN28719_c0_g4_i1.path1	novel.3941	Pepsico1_Contig6988.path1	novel.7286	TRINITY_DN19135_c0_g3_i1.path1
TRINITY_DN83410_c0_g1_i1.path1	Pepsico1_Contig4053.path1	novel.2682	TRINITY_DN26107_c0_g1_i2.path1	TRINITY_DN15509_c1_g1_i2.path1
TRINITY_DN14274_c1_g1_i7.path2	TRINITY_DN7614_c1_g2_i1.path1	Pepsico2_Contig12443.path1	TRINITY_DN19219_c0_g1_i1.path1	TRINITY_DN2657_c0_g1_i2.path1
novel.6058	Pepsico2_Contig2978.path2	novel.1527	TRINITY_DN14481_c1_g2_i1.path1	novel.10349
novel.6965	TRINITY_DN3106_c1_g1_i1.path1	novel.7833	novel.7636	TRINITY_DN34473_c0_g1_i1.path3
TRINITY_DN18409_c0_g3_i1.path1	TRINITY_DN4139_c0_g1_i1.path1	novel.1702	TRINITY_DN37195_c0_g1_i7.path1	TRINITY_DN40822_c0_g1_i1.path2
Pepsico1_Contig28299.path1	TRINITY_DN14095_c0_g1_i2.path1	novel.10536	novel.5859	Pepsico1_Contig7140.path1
TRINITY_DN15500_c0_g1_i3.path1	novel.2959	TRINITY_DN35396_c0_g1_i2.path2	novel.6234	novel.5330
TRINITY_DN7242_c0_g2_i1.path1	TRINITY_DN10575_c0_g2_i1.path1	novel.1390	novel.5372	Pepsico1_Contig3210.path1
Pepsico2_Contig17265.path1	novel.5859	novel.1477	novel.3660	Pepsico2_Contig14015.path1
novel.7113	TRINITY_DN10654_c0_g3_i2.path1	novel.5390	novel.3651	TRINITY_DN26751_c0_g1_i2.path1
novel.4879	TRINITY_DN13881_c0_g2_i8.path2	TRINITY_DN7072_c5_g1_i2.path1	novel.5970	novel.4829
novel.346	TRINITY_DN16555_c0_g1_i2.path1	novel.9627	novel.6055	novel.6231
Pepsico2_Contig2961.path1	novel.7326	TRINITY_DN2846_c0_g1_i1.path1	TRINITY_DN43172_c0_g1_i1.path2	novel.10234
Pepsico2_Contig19444.path1	novel.7988	novel.10234	Pepsico2_Contig3599.path1	Pepsico2_Contig20220.path1
novel.5911	TRINITY_DN17793_c0_g3_i2.path1	TRINITY_DN31586_c0_g1_i9.path1	TRINITY_DN14583_c0_g1_i3.path1	TRINITY_DN38440_c0_g1_i2.path1
TRINITY_DN225_c2_g1_i11.path1	novel.8652	TRINITY_DN8587_c1_g1_i1.path1	novel.680	novel.29
novel.10228	novel.6138	TRINITY_DN5322_c0_g2_i1.path1	novel.4765	novel.2962
Pepsico2_Contig5323.path1	Pepsico2_Contig9426.path1	novel.4191	TRINITY_DN11869_c0_g1_i1.path1	TRINITY_DN11130_c0_g1_i11.path1
novel.7547	Pepsico1_Contig3957.path1	Pepsico2_Contig11843.path1	novel.8810	novel.3640
novel.6356	novel.210	TRINITY_DN3394_c1_g2_i1.path1	novel.7833	TRINITY_DN4538_c0_g1_i3.path2
novel.2959	Pepsico1_Contig7725.path1	TRINITY_DN26449_c0_g1_i1.path2	Pepsico1_Contig1404.path1	Pepsico1_Contig886.path1
novel.9393	Pepsico2_Contig7708.path1	novel.50	TRINITY_DN9509_c0_g1_i4.path1	Pepsico2_Contig20590.path1
novel.1538	TRINITY_DN22560_c0_g1_i4.path1	TRINITY_DN18513_c0_g1_i1.path1	novel.5235	novel.9015
TRINITY_DN97971_c0_g1_i1.path1	TRINITY_DN12383_c0_g1_i2.path1	novel.7289	TRINITY_DN14012_c0_g1_i1.path2	TRINITY_DN16555_c0_g1_i2.path1
novel.3004	TRINITY_DN9250_c1_g1_i1.path2	novel.620	TRINITY_DN6228_c0_g3_i1.path1	novel.4541
TRINITY_DN98696_c0_g1_i1.path1	TRINITY_DN25005_c0_g1_i1.path1	TRINITY_DN20723_c1_g1_i1.path1	novel.3040	novel.7301
novel.3253	TRINITY_DN18638_c0_g1_i1.path1	Pepsico2_Contig5409.path1	TRINITY_DN29568_c0_g1_i1.path1	novel.7294
novel.8176	TRINITY_DN3601_c0_g1_i1.path2	TRINITY_DN15509_c1_g1_i2.path1	TRINITY_DN37359_c0_g1_i1.path2	novel.9627
TRINITY_DN10556_c0_g1_i1.path1	novel.680	novel.1116	novel.7113	TRINITY_DN11668_c0_g1_i19.path1
novel.5163	TRINITY_DN16922_c0_g1_i1.path1	novel.7424	TRINITY_DN9250_c1_g1_i1.path1	Pepsico2_Contig9071.path1
novel.1708	TRINITY_DN34274_c0_g1_i1.path1	Pepsico1_Contig37386.path1	TRINITY_DN3559_c0_g2_i1.path1	TRINITY_DN21706_c0_g1_i3.path2
novel.473	TRINITY_DN20136_c1_g1_i1.path3	TRINITY_DN12383_c0_g1_i2.path1	novel.5267	TRINITY_DN88081_c0_g1_i1.path1
novel.3962	TRINITY_DN81975_c0_g1_i1.path1	TRINITY_DN31317_c1_g1_i2.path1	novel.3664	TRINITY_DN85435_c0_g1_i1.path1
TRINITY_DN71109_c0_g1_i1.path2	TRINITY_DN49890_c0_g1_i1.path1	TRINITY_DN26672_c1_g2_i2.path1	TRINITY_DN30719_c0_g1_i1.path2	novel.3434
novel.315	Pepsico2_Contig12951.path1	novel.3159	novel.2956	TRINITY_DN22549_c0_g2_i1.path1
Pepsico2_Contig12326.path2	Pepsico2_Contig19245.path1	TRINITY_DN10718_c0_g4_i1.path1	novel.6220	TRINITY_DN7214_c0_g3_i2.path1
novel.7326	TRINITY_DN12703_c0_g2_i1.path1	novel.8632	TRINITY_DN10416_c0_g2_i1.path1	TRINITY_DN30931_c0_g2_i1.path1
Pepsico2_Contig15428.path1	TRINITY_DN11130_c0_g1_i11.path1	Pepsico2_Contig11484.path2	TRINITY_DN92652_c0_g1_i1.path1	TRINITY_DN10873_c0_g2_i1.path1
Pepsico2_Contig14015.path1	TRINITY_DN106836_c0_g1_i1.path1	TRINITY_DN13591_c0_g1_i5.path1	TRINITY_DN9385_c2_g1_i1.path1	TRINITY_DN31586_c0_g1_i9.path1
Pepsico2_Contig18009.path1	TRINITY_DN33567_c0_g1_i1.path2	novel.5598	Pepsico1_Contig3448.path1	Pepsico2_Contig5526.path1
TRINITY_DN34274_c0_g1_i1.path1	TRINITY_DN28234_c1_g1_i1.path1	novel.375	TRINITY_DN79972_c0_g1_i1.path1	TRINITY_DN20723_c1_g1_i1.path1
TRINITY_DN112475_c0_g1_i1.path1	novel.4051	novel.10325	novel.6231	novel.8142
TRINITY_DN102817_c0_g1_i1.path1	novel.1226	Pepsico2_Contig8385.path1	Pepsico1_Contig2081.path1	TRINITY_DN1502_c0_g1_i2.path1
novel.8936	TRINITY_DN17687_c0_g2_i2.path1	Pepsico2_Contig20349.path1	TRINITY_DN10595_c0_g2_i2.path2	TRINITY_DN44824_c0_g1_i1.path3
TRINITY_DN25186_c0_g1_i1.path3	novel.9349	novel.9528	TRINITY_DN31855_c0_g1_i2.path2	TRINITY_DN15123_c0_g1_i4.path1
TRINITY_DN31586_c0_g1_i9.path1	TRINITY_DN17993_c0_g1_i5.path1	novel.8746	novel.6159	TRINITY_DN27_c3_g1_i1.path1
TRINITY_DN10891_c1_g1_i1.path2	TRINITY_DN111692_c0_g1_i1.path1	novel.6151	Pepsico2_Contig12140.path1	TRINITY_DN34811_c1_g1_i1.path3
TRINITY_DN11880_c0_g1_i1.path3	novel.6992	TRINITY_DN2854_c0_g1_i1.path1	TRINITY_DN33640_c0_g3_i1.path1	novel.6334
Pepsico1_Contig34834.path3	TRINITY_DN53024_c0_g1_i1.path1	novel.5859	novel.8652	TRINITY_DN87722_c0_g1_i1.path3
novel.5257	TRINITY_DN9250_c1_g1_i1.path1	novel.7113	TRINITY_DN31586_c0_g1_i9.path1	TRINITY_DN23242_c0_g2_i5.path1
TRINITY_DN33725_c0_g1_i2.path1	novel.10308	Pepsico1_Contig7140.path1	novel.1708	Pepsico2_Contig16720.path1
TRINITY_DN31463_c0_g1_i1.path1	novel.8746	Pepsico2_Contig20590.path1	novel.4963	TRINITY_DN15032_c0_g1_i1.path2
TRINITY_DN4769_c0_g1_i5.path2	TRINITY_DN1697_c0_g1_i1.path2	TRINITY_DN1412_c0_g1_i1.path1	Pepsico1_Contig8217.path2	novel.9486
TRINITY_DN30268_c0_g3_i2.path1	novel.403	TRINITY_DN31143_c0_g1_i14.path1	novel.9827	novel.10032
TRINITY_DN30892_c0_g1_i1.path1	TRINITY_DN31855_c0_g1_i2.path2	TRINITY_DN1122_c0_g4_i2.path2	novel.9681	novel.9808
TRINITY_DN9250_c1_g1_i1.path2	TRINITY_DN51625_c0_g1_i1.path1	TRINITY_DN2337_c0_g1_i6.path2	novel.9354	novel.3210
TRINITY_DN79265_c0_g1_i1.path1	novel.5064	TRINITY_DN4027_c0_g5_i1.path1	novel.877	novel.9827
TRINITY_DN5122_c0_g1_i5.path1	novel.2647	TRINITY_DN102817_c0_g1_i1.path1	TRINITY_DN25217_c0_g1_i1.path1	novel.4029
novel.6045	novel.8672	novel.3004	novel.2966	TRINITY_DN65115_c0_g1_i1.path1
TRINITY_DN41519_c0_g1_i1.path1	novel.392	TRINITY_DN25461_c0_g1_i1.path2	novel.1226	TRINITY_DN42988_c0_g1_i2.path1
TRINITY_DN40112_c0_g1_i1.path1	TRINITY_DN107989_c0_g1_i1.path1	novel.6138	Pepsico1_Contig36864.path2	novel.5683
novel.9029	novel.6220	novel.4879	Pepsico2_Contig8385.path1	TRINITY_DN26454_c0_g1_i1.path3
TRINITY_DN41641_c0_g1_i2.path1	TRINITY_DN31586_c0_g1_i9.path1	TRINITY_DN27567_c0_g1_i1.path1	novel.2441	TRINITY_DN4769_c0_g1_i5.path2
novel.5330	TRINITY_DN9600_c0_g1_i1.path1	Pepsico2_Contig13814.path1	Pepsico2_Contig17072.path2	Pepsico2_Contig8462.path1
TRINITY_DN26957_c0_g1_i1.path1	TRINITY_DN14667_c0_g2_i5.path2	novel.5974	TRINITY_DN9373_c0_g1_i6.path1	TRINITY_DN84648_c0_g1_i1.path2
novel.5020	TRINITY_DN6932_c0_g1_i3.path1	Pepsico2_Contig7708.path1	novel.3941	TRINITY_DN15198_c0_g1_i2.path2
TRINITY_DN2518_c0_g1_i3.path1	novel.6079	TRINITY_DN11478_c0_g1_i4.path2	novel.6441	TRINITY_DN13591_c0_g1_i5.path1
novel.6199	novel.5974	novel.7847	TRINITY_DN13249_c0_g2_i1.path1	novel.787
TRINITY_DN80506_c0_g1_i1.path1	TRINITY_DN13624_c0_g1_i5.path1	novel.7121	TRINITY_DN27_c3_g1_i1.path1	TRINITY_DN9335_c0_g1_i7.path2
TRINITY_DN11598_c0_g1_i1.path1	novel.2682	TRINITY_DN74032_c0_g1_i1.path2	TRINITY_DN13996_c0_g1_i2.path1	TRINITY_DN11869_c0_g1_i1.path1
novel.2490	novel.7453	TRINITY_DN61850_c0_g1_i1.path2	novel.9528	TRINITY_DN10990_c0_g2_i1.path2
novel.7466	TRINITY_DN42581_c0_g1_i1.path1	TRINITY_DN42581_c0_g1_i1.path1	Pepsico2_Contig20590.path1	TRINITY_DN9653_c0_g2_i1.path1
Pepsico1_Contig24342.path2	Pepsico1_Contig1025.path1	novel.7368	novel.1524	TRINITY_DN4606_c0_g2_i1.path1
Pepsico2_Contig2978.path2	novel.4879	TRINITY_DN11130_c0_g1_i11.path1	novel.5	novel.8
TRINITY_DN6846_c1_g1_i1.path1	novel.7466	TRINITY_DN10990_c0_g2_i1.path2	novel.10326	TRINITY_DN24742_c0_g3_i1.path2
novel.3159	TRINITY_DN19898_c0_g5_i2.path1	novel.5885	novel.1672	novel.267
novel.9387	novel.6037	Pepsico1_Contig30037.path1	novel.6165	novel.9130
novel.6330	novel.1711	novel.7158	TRINITY_DN7190_c0_g3_i1.path1	novel.2582
novel.10325	novel.6941	novel.3190	TRINITY_DN23431_c0_g1_i2.path1	TRINITY_DN101519_c0_g1_i1.path1
TRINITY_DN7797_c0_g1_i2.path1	novel.346	novel.6375	TRINITY_DN68790_c0_g1_i1.path1	TRINITY_DN16922_c0_g1_i1.path1
novel.215	TRINITY_DN30929_c0_g1_i2.path1	TRINITY_DN111692_c0_g1_i1.path1	novel.7149	TRINITY_DN36030_c0_g1_i1.path1
novel.349	TRINITY_DN109518_c0_g1_i1.path3	novel.12	TRINITY_DN74032_c0_g1_i1.path2	TRINITY_DN10700_c0_g2_i1.path1
TRINITY_DN6293_c0_g1_i1.path1	TRINITY_DN15509_c1_g1_i2.path1	TRINITY_DN20136_c1_g1_i1.path3	TRINITY_DN1167_c0_g2_i1.path1	novel.3259
novel.426	TRINITY_DN10664_c1_g6_i1.path2	TRINITY_DN2585_c2_g1_i1.path2	TRINITY_DN8605_c0_g1_i8.path1	TRINITY_DN30714_c0_g1_i2.path1
Pepsico2_Contig2180.path1	novel.8920	TRINITY_DN61247_c0_g1_i1.path1	novel.6216	TRINITY_DN10572_c0_g2_i1.path1
novel.4793	TRINITY_DN21149_c0_g3_i1.path1	TRINITY_DN4954_c0_g2_i1.path2	novel.7658	TRINITY_DN87130_c0_g1_i1.path1
Pepsico2_Contig2154.path1	TRINITY_DN25777_c0_g1_i1.path2	novel.4468	Pepsico2_Contig19795.path1	TRINITY_DN9608_c0_g2_i2.path2
novel.3688	novel.10078	TRINITY_DN27_c3_g1_i1.path1	TRINITY_DN44751_c0_g1_i1.path1	Pepsico1_Contig37885.path1
TRINITY_DN21044_c2_g1_i1.path4	novel.1702	TRINITY_DN13168_c0_g1_i1.path1	Pepsico1_Contig4680.path1	TRINITY_DN19075_c0_g1_i3.path1
TRINITY_DN9653_c0_g2_i1.path1	TRINITY_DN22405_c0_g2_i1.path2	Pepsico2_Contig11020.path1	novel.403	novel.7823
Pepsico2_Contig16486.path1	TRINITY_DN20723_c1_g1_i1.path1	TRINITY_DN19684_c1_g1_i1.path1	novel.6356	TRINITY_DN21473_c0_g1_i1.path1
novel.6333	novel.2690	TRINITY_DN109518_c0_g1_i1.path3	novel.1709	TRINITY_DN34147_c0_g1_i7.path1
TRINITY_DN7703_c1_g1_i1.path2	TRINITY_DN10556_c0_g1_i1.path1	TRINITY_DN30892_c0_g1_i1.path1	novel.3378	novel.7300
TRINITY_DN18286_c0_g1_i1.path2	novel.7658	novel.9486	novel.1757	novel.7176
TRINITY_DN28605_c0_g3_i3.path1	TRINITY_DN97436_c0_g1_i1.path1	TRINITY_DN9373_c0_g1_i6.path1	novel.10087	novel.5390
Pepsico2_Contig7319.path1	novel.6928	TRINITY_DN75642_c0_g1_i1.path1	TRINITY_DN2548_c0_g1_i5.path1	TRINITY_DN17100_c0_g1_i12.path1
TRINITY_DN98034_c0_g1_i1.path2	novel.5598	novel.1224	TRINITY_DN19404_c0_g1_i1.path1	TRINITY_DN34912_c0_g1_i2.path1
TRINITY_DN11130_c0_g1_i11.path1	TRINITY_DN30892_c0_g1_i1.path1	TRINITY_DN5730_c0_g2_i2.path1	TRINITY_DN1258_c0_g9_i1.path1	novel.4668
novel.9338	TRINITY_DN10323_c0_g1_i5.path1	Pepsico1_Contig5655.path1	TRINITY_DN28605_c0_g3_i3.path1	novel.6333
novel.10538	novel.6182	novel.6527	TRINITY_DN75397_c0_g1_i1.path1	TRINITY_DN31113_c0_g3_i2.path1
novel.8663	TRINITY_DN11057_c0_g2_i1.path2	TRINITY_DN78952_c0_g1_i1.path1	novel.10179	TRINITY_DN15509_c2_g1_i1.path2
Pepsico2_Contig17130.path1	novel.9391	TRINITY_DN56459_c0_g1_i1.path1	TRINITY_DN30113_c1_g1_i1.path1	TRINITY_DN4027_c0_g5_i1.path3
novel.3186	Pepsico2_Contig19917.path4	TRINITY_DN13035_c0_g1_i13.path1	Pepsico1_Contig3802.path1	novel.8314
TRINITY_DN8587_c1_g1_i1.path1	novel.4765	Pepsico2_Contig426.path1	Pepsico1_Contig6988.path1	TRINITY_DN14220_c0_g2_i6.path1
TRINITY_DN36403_c0_g4_i2.path1	novel.1806	TRINITY_DN373_c0_g2_i8.path1	TRINITY_DN36669_c0_g1_i1.path1	TRINITY_DN21116_c0_g1_i2.path1
novel.7772	TRINITY_DN17100_c0_g1_i12.path1	TRINITY_DN28605_c0_g3_i3.path1	Pepsico2_Contig13875.path1	TRINITY_DN18638_c0_g1_i1.path1
Pepsico2_Contig20015.path1	TRINITY_DN53995_c0_g1_i1.path1	TRINITY_DN17100_c0_g1_i12.path1	novel.6517	TRINITY_DN582_c2_g1_i6.path2
TRINITY_DN69493_c0_g1_i1.path1	novel.2160	TRINITY_DN11057_c0_g2_i1.path2	TRINITY_DN49735_c0_g1_i1.path1	Pepsico1_Contig28670.path1
TRINITY_DN21332_c0_g2_i2.path1	Pepsico2_Contig19479.path1	TRINITY_DN13853_c0_g1_i1.path2	TRINITY_DN45793_c0_g1_i1.path1	TRINITY_DN77289_c0_g1_i1.path2
novel.229	TRINITY_DN69_c2_g1_i1.path1	novel.8827	Pepsico2_Contig21149.path1	TRINITY_DN13646_c0_g1_i1.path1
TRINITY_DN8599_c1_g1_i3.path3	Pepsico2_Contig11020.path1	novel.6685	TRINITY_DN14238_c1_g1_i1.path1	TRINITY_DN38929_c0_g1_i2.path1
novel.5798	Pepsico2_Contig14060.path1	TRINITY_DN6573_c0_g1_i4.path1	TRINITY_DN13963_c1_g1_i1.path1	novel.9806
novel.6334	TRINITY_DN23876_c1_g1_i1.path1	TRINITY_DN6565_c0_g1_i3.path1	novel.5626	TRINITY_DN21044_c2_g1_i1.path3
TRINITY_DN7964_c0_g1_i2.path1	TRINITY_DN8916_c0_g2_i1.path1	TRINITY_DN52949_c0_g1_i1.path1	TRINITY_DN9829_c0_g1_i3.path1	Pepsico1_Contig37386.path1
novel.560	novel.9029	TRINITY_DN75269_c0_g1_i1.path1	TRINITY_DN27290_c0_g1_i1.path1	novel.7149
TRINITY_DN20497_c0_g1_i1.path4	novel.7842	Pepsico2_Contig20774.path2	TRINITY_DN11705_c0_g1_i1.path1	novel.3639
TRINITY_DN4252_c0_g3_i1.path2	TRINITY_DN13022_c0_g1_i1.path1	novel.7466	TRINITY_DN276_c1_g1_i1.path1	Pepsico2_Contig17764.path1
TRINITY_DN106711_c0_g1_i1.path1	novel.6231	novel.7286	novel.6183	TRINITY_DN34205_c0_g1_i1.path3
TRINITY_DN14711_c1_g4_i1.path1	TRINITY_DN22747_c0_g1_i3.path1	novel.4244	TRINITY_DN10891_c1_g1_i1.path2	novel.5220
TRINITY_DN10575_c0_g2_i1.path1	TRINITY_DN40822_c0_g1_i1.path2	novel.5064	novel.5673	TRINITY_DN7631_c0_g1_i2.path1
TRINITY_DN11147_c0_g1_i1.path1	Pepsico1_Contig1514.path1	Pepsico2_Contig550.path1	novel.6937	TRINITY_DN23431_c0_g1_i2.path1
TRINITY_DN38440_c0_g1_i2.path1	Pepsico2_Contig10700.path1	TRINITY_DN59441_c0_g1_i2.path2	TRINITY_DN25384_c0_g2_i1.path3	TRINITY_DN81975_c0_g1_i1.path1
TRINITY_DN88081_c0_g1_i1.path1	novel.1372	novel.9836	novel.2962	TRINITY_DN15788_c0_g1_i1.path1
TRINITY_DN35396_c0_g1_i2.path2	TRINITY_DN16237_c0_g5_i1.path2	TRINITY_DN23242_c0_g2_i5.path1	novel.4541	Pepsico1_Contig725.path2
TRINITY_DN34221_c0_g1_i1.path1	Pepsico2_Contig14015.path1	TRINITY_DN7614_c1_g2_i1.path1	Pepsico1_Contig34145.path1	novel.10308
TRINITY_DN4789_c0_g1_i1.path3	TRINITY_DN20153_c1_g1_i1.path1	Pepsico2_Contig12464.path1	Pepsico2_Contig7708.path1	Pepsico1_Contig8217.path2
novel.4401	novel.8663	Pepsico2_Contig6725.path2	TRINITY_DN10664_c1_g6_i1.path2	novel.87
TRINITY_DN8174_c0_g1_i4.path1	TRINITY_DN9509_c0_g1_i4.path1	TRINITY_DN4942_c0_g1_i2.path1	Pepsico2_Contig13308.path1	novel.474
TRINITY_DN112208_c0_g1_i1.path1	TRINITY_DN23219_c0_g3_i3.path1	novel.4765	TRINITY_DN20723_c1_g1_i1.path1	TRINITY_DN13853_c0_g1_i1.path2
novel.6037	novel.2963	novel.10329	TRINITY_DN3299_c0_g1_i18.path1	TRINITY_DN20215_c0_g1_i3.path1
novel.7294	TRINITY_DN18488_c0_g1_i1.path1	novel.4470	TRINITY_DN30361_c0_g1_i2.path1	TRINITY_DN105715_c0_g1_i1.path1
TRINITY_DN33567_c0_g1_i1.path2	TRINITY_DN26449_c0_g1_i1.path2	novel.1343	Pepsico1_Contig28299.path1	Pepsico2_Contig14708.path1
novel.625	novel.3414	Pepsico2_Contig8195.path2	TRINITY_DN37516_c0_g1_i1.path1	novel.10536
TRINITY_DN13624_c0_g1_i5.path1	novel.10325	novel.1672	Pepsico2_Contig16099.path1	TRINITY_DN6829_c1_g1_i1.path1
Pepsico2_Contig1343.path2	TRINITY_DN13294_c0_g1_i1.path1	TRINITY_DN16922_c0_g1_i1.path1	TRINITY_DN18638_c0_g1_i1.path1	Pepsico2_Contig2312.path1
Pepsico1_Contig1479.path1	Pepsico1_Contig33288.path1	Pepsico1_Contig4308.path1	novel.774	TRINITY_DN22833_c0_g3_i3.path1
TRINITY_DN7064_c1_g1_i4.path1	novel.1708	TRINITY_DN7797_c0_g1_i2.path1	novel.5969	novel.2956
novel.6231	novel.9486	novel.7210	novel.12	TRINITY_DN27841_c0_g1_i1.path1
novel.5958	novel.5813	novel.5798	novel.3190	TRINITY_DN13899_c0_g1_i7.path1
novel.3762	novel.4897	novel.5550	TRINITY_DN44353_c0_g1_i1.path1	TRINITY_DN16918_c0_g1_i7.path2
TRINITY_DN16555_c0_g1_i2.path1	TRINITY_DN249_c1_g1_i1.path1	novel.10177	novel.4500	novel.7082
Pepsico2_Contig15312.path1	TRINITY_DN30714_c0_g1_i2.path1	TRINITY_DN8916_c0_g2_i1.path1	Pepsico1_Contig340.path1	TRINITY_DN10559_c0_g1_i12.path1
novel.6234	TRINITY_DN8862_c2_g1_i8.path2	novel.4444	TRINITY_DN20215_c0_g1_i3.path1	novel.1106
TRINITY_DN4456_c0_g2_i10.path3	novel.4444	TRINITY_DN29573_c0_g1_i8.path1	Pepsico2_Contig17265.path1	TRINITY_DN6494_c0_g1_i1.path1
novel.8997	Pepsico2_Contig20721.path1	TRINITY_DN10891_c1_g1_i1.path1	novel.8314	novel.6183
TRINITY_DN8622_c0_g1_i2.path1	novel.9393	TRINITY_DN31623_c0_g1_i1.path1	TRINITY_DN10323_c0_g1_i5.path1	Pepsico2_Contig10938.path2
TRINITY_DN6513_c0_g2_i1.path1	TRINITY_DN15073_c0_g1_i2.path1	novel.787	TRINITY_DN11130_c0_g1_i11.path1	Pepsico2_Contig200.path1
TRINITY_DN7614_c1_g2_i1.path1	TRINITY_DN37898_c0_g1_i2.path1	TRINITY_DN23876_c1_g1_i1.path1	TRINITY_DN12408_c0_g2_i2.path1	TRINITY_DN8198_c1_g1_i1.path1
TRINITY_DN61511_c1_g1_i1.path1	novel.3186	novel.6182	Pepsico1_Contig37533.path4	novel.1177
novel.5071	novel.7695	novel.2582	TRINITY_DN383_c1_g2_i1.path1	novel.5924
novel.375	TRINITY_DN28605_c0_g3_i3.path1	TRINITY_DN2551_c0_g2_i2.path2	novel.9685	novel.426
TRINITY_DN8469_c0_g1_i11.path1	TRINITY_DN2337_c0_g1_i6.path2	novel.7636	novel.9486	TRINITY_DN10477_c1_g1_i6.path2
Pepsico2_Contig19271.path1	novel.3126	Pepsico2_Contig12140.path1	TRINITY_DN4225_c0_g1_i11.path1	novel.7670
novel.3196	novel.3688	novel.793	novel.8928	TRINITY_DN4944_c0_g2_i1.path1
TRINITY_DN10477_c1_g1_i6.path2	novel.4836	TRINITY_DN9250_c1_g1_i1.path2	novel.9707	TRINITY_DN21802_c0_g2_i1.path1
novel.4680	novel.5798	TRINITY_DN8753_c0_g1_i3.path1	novel.6138	novel.6649
TRINITY_DN16237_c0_g5_i1.path2	novel.3253	novel.5163	Pepsico2_Contig3196.path1	TRINITY_DN21706_c0_g1_i3.path1
TRINITY_DN15183_c0_g1_i1.path2	TRINITY_DN6513_c0_g2_i1.path1	TRINITY_DN23525_c0_g2_i1.path1	novel.8823	TRINITY_DN43549_c0_g1_i1.path2
TRINITY_DN37195_c0_g1_i7.path1	Pepsico1_Contig4828.path2	novel.8663	Pepsico1_Contig3210.path1	TRINITY_DN32267_c0_g1_i1.path1
novel.787	TRINITY_DN35396_c0_g1_i2.path2	TRINITY_DN10654_c0_g3_i2.path1	TRINITY_DN45971_c0_g1_i3.path1	TRINITY_DN5970_c0_g2_i1.path2
TRINITY_DN17100_c0_g1_i12.path1	novel.6685	novel.9510	novel.9855	TRINITY_DN225_c2_g1_i11.path1
TRINITY_DN13591_c0_g1_i5.path1	novel.10201	TRINITY_DN51625_c0_g1_i1.path1	novel.9391	TRINITY_DN83442_c0_g1_i1.path1
TRINITY_DN14667_c0_g2_i5.path2	TRINITY_DN23219_c0_g5_i1.path1	novel.1510	TRINITY_DN6513_c0_g2_i1.path1	novel.6234
TRINITY_DN21483_c0_g2_i3.path1	novel.3756	TRINITY_DN15509_c2_g1_i1.path2	TRINITY_DN94969_c0_g1_i1.path1	TRINITY_DN22076_c0_g2_i1.path1
novel.9015	novel.3230	TRINITY_DN91196_c0_g1_i1.path1	novel.8125	novel.6651
TRINITY_DN11731_c0_g3_i1.path1	Pepsico2_Contig5308.path1	TRINITY_DN1167_c0_g2_i1.path1	Pepsico2_Contig11466.path1	TRINITY_DN71109_c0_g1_i1.path2
TRINITY_DN5730_c0_g2_i2.path1	TRINITY_DN5816_c0_g1_i8.path1	TRINITY_DN82762_c0_g1_i1.path1	novel.1224	TRINITY_DN12108_c0_g2_i1.path1
novel.7658	novel.6330	Pepsico2_Contig7319.path1	TRINITY_DN29283_c0_g1_i1.path2	novel.4790
Pepsico2_Contig2618.path1	Pepsico2_Contig15299.path2	novel.1708	TRINITY_DN5931_c0_g1_i7.path1	novel.5550
Pepsico2_Contig7517.path1	novel.10349	TRINITY_DN88081_c0_g1_i1.path1	novel.158	TRINITY_DN23256_c0_g1_i1.path1
TRINITY_DN8622_c0_g3_i1.path1	TRINITY_DN112208_c0_g1_i1.path1	TRINITY_DN21802_c0_g2_i1.path1	TRINITY_DN57700_c0_g1_i1.path1	TRINITY_DN101747_c0_g1_i1.path2
novel.9354	novel.9695	TRINITY_DN52679_c0_g1_i1.path2	TRINITY_DN71109_c0_g1_i1.path2	novel.2831
novel.2408	Pepsico1_Contig3556.path1	Pepsico2_Contig17563.path2	novel.2763	TRINITY_DN6932_c0_g1_i3.path1
TRINITY_DN22391_c0_g1_i2.path1	novel.10234	TRINITY_DN9426_c0_g1_i3.path1	TRINITY_DN15969_c0_g1_i3.path1	novel.8997
novel.2682	novel.6228	TRINITY_DN26562_c0_g1_i1.path1	novel.5798	TRINITY_DN57903_c0_g2_i1.path5
novel.7345	novel.5673	TRINITY_DN7147_c0_g1_i3.path1	novel.8929	novel.4048
TRINITY_DN14583_c0_g1_i3.path1	Pepsico2_Contig2154.path1	TRINITY_DN98034_c0_g1_i1.path2	TRINITY_DN9250_c1_g1_i1.path2	TRINITY_DN11525_c0_g1_i21.path1
Pepsico2_Contig12140.path1	Pepsico2_Contig10688.path1	novel.4050	TRINITY_DN21288_c0_g2_i2.path1	TRINITY_DN40949_c1_g1_i1.path2
novel.9808	TRINITY_DN4769_c0_g1_i5.path2	TRINITY_DN10621_c0_g1_i7.path1	TRINITY_DN1258_c0_g4_i2.path1	TRINITY_DN39896_c0_g1_i1.path2
TRINITY_DN6932_c0_g1_i3.path1	TRINITY_DN11705_c0_g1_i1.path1	novel.5972	Pepsico1_Contig916.path1	novel.5372
TRINITY_DN15123_c0_g1_i4.path1	novel.7158	TRINITY_DN19898_c0_g5_i2.path1	TRINITY_DN6565_c0_g1_i3.path1	novel.5163
novel.8652	TRINITY_DN10990_c0_g2_i1.path2	TRINITY_DN6829_c1_g1_i1.path1	TRINITY_DN23242_c0_g2_i5.path1	Pepsico1_Contig3556.path1
novel.6517	Pepsico2_Contig8195.path2	novel.3908	novel.6037	TRINITY_DN13881_c0_g2_i8.path1
novel.6527	TRINITY_DN106297_c0_g1_i1.path1	novel.5958	Pepsico1_Contig17817.path1	novel.8313
TRINITY_DN34756_c0_g1_i5.path1	novel.9609	novel.1891	novel.4346	novel.215
TRINITY_DN32457_c0_g1_i1.path2	Pepsico1_Contig982.path1	Pepsico2_Contig16985.path1	TRINITY_DN19075_c0_g1_i3.path1	novel.5264
Pepsico2_Contig14060.path1	novel.7425	TRINITY_DN16937_c0_g1_i1.path2	novel.10078	TRINITY_DN11478_c0_g1_i4.path1
novel.5224	novel.4793	Pepsico2_Contig14015.path1	TRINITY_DN6544_c0_g2_i1.path1	TRINITY_DN397_c0_g2_i1.path1
novel.1719	TRINITY_DN16286_c0_g1_i4.path1	TRINITY_DN17278_c1_g1_i1.path1	novel.10308	novel.7292
TRINITY_DN111423_c0_g1_i1.path1	novel.6098	TRINITY_DN24932_c0_g1_i1.path1	TRINITY_DN10575_c0_g2_i1.path1	Pepsico2_Contig12326.path2
TRINITY_DN10891_c1_g1_i1.path1	TRINITY_DN23431_c0_g1_i2.path1	TRINITY_DN15164_c0_g1_i4.path1	TRINITY_DN11608_c2_g1_i1.path1	TRINITY_DN7475_c0_g2_i1.path1
novel.10246	TRINITY_DN47515_c0_g1_i2.path1	TRINITY_DN59441_c0_g1_i2.path4	TRINITY_DN11478_c0_g1_i4.path1	novel.10325
TRINITY_DN13853_c0_g1_i1.path2	TRINITY_DN8599_c1_g1_i3.path3	TRINITY_DN21483_c0_g2_i3.path1	TRINITY_DN10700_c0_g2_i1.path1	TRINITY_DN61850_c0_g1_i1.path2
Pepsico1_Contig4308.path1	TRINITY_DN26672_c1_g2_i2.path1	TRINITY_DN36478_c0_g1_i3.path1	novel.1355	Pepsico1_Contig4680.path1
novel.1517	TRINITY_DN31456_c0_g2_i4.path2	TRINITY_DN17993_c0_g1_i5.path1	TRINITY_DN75642_c0_g1_i1.path1	novel.5257
Pepsico2_Contig12767.path1	TRINITY_DN18123_c0_g1_i6.path1	novel.4051	TRINITY_DN15878_c0_g1_i6.path1	TRINITY_DN58726_c0_g1_i1.path1
TRINITY_DN8484_c0_g4_i1.path1	TRINITY_DN5174_c1_g1_i2.path1	TRINITY_DN27142_c0_g2_i1.path1	TRINITY_DN2755_c0_g2_i1.path2	novel.8827
TRINITY_DN7472_c0_g2_i1.path1	TRINITY_DN65604_c0_g1_i1.path1	novel.3688	novel.4967	novel.10201
TRINITY_DN49704_c0_g1_i1.path1	novel.1891	Pepsico2_Contig11832.path1	novel.10032	TRINITY_DN83410_c0_g1_i1.path1
Pepsico2_Contig8385.path1	TRINITY_DN59680_c0_g1_i1.path1	TRINITY_DN10323_c0_g1_i5.path1	TRINITY_DN49221_c0_g1_i1.path1	TRINITY_DN4640_c0_g2_i1.path2
novel.2960	novel.3651	novel.1806	TRINITY_DN29732_c0_g1_i1.path1	TRINITY_DN25628_c0_g1_i1.path1
novel.10160	novel.10536	TRINITY_DN13542_c0_g1_i1.path1	TRINITY_DN105250_c0_g1_i1.path1	novel.4470
TRINITY_DN10323_c0_g1_i5.path1	TRINITY_DN11880_c0_g1_i1.path3	TRINITY_DN10556_c0_g1_i1.path1	TRINITY_DN37171_c0_g1_i1.path1	novel.5636
novel.9627	Pepsico2_Contig7656.path1	TRINITY_DN13385_c1_g1_i3.path1	novel.6333	TRINITY_DN7190_c0_g3_i1.path1
novel.3941	TRINITY_DN29573_c0_g1_i8.path1	TRINITY_DN9829_c0_g1_i3.path1	novel.7175	TRINITY_DN112088_c0_g1_i1.path1
novel.9695	novel.240	TRINITY_DN65115_c0_g1_i1.path1	TRINITY_DN1734_c1_g1_i1.path1	TRINITY_DN45971_c0_g1_i3.path1
novel.6164	novel.2513	TRINITY_DN10575_c0_g2_i1.path1	novel.6027	TRINITY_DN24254_c0_g1_i2.path1
TRINITY_DN9007_c0_g1_i2.path1	TRINITY_DN43677_c0_g2_i2.path1	Pepsico2_Contig20023.path1	TRINITY_DN6932_c0_g1_i3.path1	TRINITY_DN5232_c0_g1_i7.path1
TRINITY_DN25430_c0_g1_i2.path2	TRINITY_DN13385_c1_g1_i3.path1	novel.4266	Pepsico2_Contig11843.path1	novel.8937
TRINITY_DN25005_c0_g1_i1.path1	TRINITY_DN37891_c0_g3_i1.path1	novel.6228	TRINITY_DN26560_c0_g2_i1.path2	TRINITY_DN1380_c0_g1_i2.path2
TRINITY_DN42581_c0_g1_i1.path1	novel.2142	Pepsico1_Contig33288.path1	novel.6045	novel.5667
Pepsico1_Contig21216.path2	novel.8875	novel.8909	TRINITY_DN32537_c1_g1_i1.path1	TRINITY_DN2585_c2_g1_i1.path2
Pepsico2_Contig8540.path2	TRINITY_DN57429_c0_g1_i1.path1	TRINITY_DN75397_c0_g1_i1.path1	TRINITY_DN11668_c0_g1_i19.path1	novel.9528
Pepsico2_Contig19268.path2	Pepsico2_Contig20342.path1	Pepsico2_Contig337.path1	novel.620	TRINITY_DN18240_c0_g3_i1.path1
TRINITY_DN20723_c1_g1_i1.path1	TRINITY_DN31623_c0_g1_i1.path1	TRINITY_DN14583_c0_g1_i3.path1	TRINITY_DN29879_c0_g1_i4.path1	TRINITY_DN22129_c0_g4_i1.path2
TRINITY_DN9776_c0_g1_i9.path2	TRINITY_DN65115_c0_g1_i1.path1	TRINITY_DN82047_c0_g1_i1.path1	TRINITY_DN12386_c0_g2_i1.path1	novel.1776
TRINITY_DN8756_c9_g1_i1.path1	Pepsico2_Contig12952.path2	TRINITY_DN16555_c0_g1_i2.path1	TRINITY_DN21802_c0_g2_i1.path1	novel.5859
TRINITY_DN8779_c0_g2_i3.path1	TRINITY_DN4942_c0_g1_i2.path1	novel.6356	TRINITY_DN79513_c0_g1_i1.path1	novel.1801
TRINITY_DN4783_c0_g2_i1.path1	TRINITY_DN27458_c0_g1_i3.path1	TRINITY_DN14211_c0_g1_i3.path1	TRINITY_DN5970_c0_g2_i1.path2	novel.9384
TRINITY_DN101519_c0_g1_i1.path1	TRINITY_DN9653_c0_g2_i1.path1	Pepsico2_Contig10040.path1	Pepsico2_Contig8853.path1	TRINITY_DN6563_c0_g1_i19.path2
TRINITY_DN16393_c0_g1_i1.path1	TRINITY_DN11265_c0_g1_i9.path1	novel.4527	TRINITY_DN19684_c1_g1_i1.path1	novel.3882
Pepsico2_Contig3632.path2	novel.625	novel.1372	novel.6649	TRINITY_DN10575_c0_g2_i1.path1
novel.9466	TRINITY_DN429_c0_g1_i1.path1	TRINITY_DN41080_c0_g1_i1.path1	TRINITY_DN22129_c0_g4_i1.path2	TRINITY_DN4027_c2_g1_i1.path2
TRINITY_DN25777_c0_g1_i1.path2	Pepsico1_Contig14950.path1	novel.1711	novel.2648	novel.4517
TRINITY_DN15040_c0_g1_i1.path1	TRINITY_DN7797_c0_g1_i2.path1	novel.8823	novel.9475	TRINITY_DN32159_c0_g1_i1.path1
Pepsico2_Contig6858.path1	novel.6659	novel.1731	TRINITY_DN4954_c0_g2_i1.path2	TRINITY_DN9209_c0_g1_i7.path1
TRINITY_DN2548_c0_g1_i5.path1	Pepsico2_Contig11832.path1	TRINITY_DN112740_c0_g1_i1.path2	novel.9865	novel.6059
novel.6391	Pepsico2_Contig5745.path1	novel.7149	novel.9510	novel.7199
novel.8942	novel.6334	TRINITY_DN2755_c0_g2_i1.path2	TRINITY_DN4076_c0_g1_i5.path1	novel.6523
TRINITY_DN1241_c1_g1_i1.path1	TRINITY_DN1258_c0_g4_i2.path1	Pepsico2_Contig17102.path1	novel.7838	TRINITY_DN28719_c0_g4_i1.path1
TRINITY_DN55735_c1_g1_i1.path1	TRINITY_DN61850_c0_g1_i1.path2	novel.10160	novel.5974	novel.2808
TRINITY_DN11134_c0_g1_i14.path1	novel.6472	Pepsico2_Contig19114.path1	novel.5850	novel.2713
TRINITY_DN81975_c0_g1_i1.path1	TRINITY_DN111423_c0_g1_i1.path1	Pepsico2_Contig11020.path2	novel.7300	Pepsico2_Contig2921.path1
TRINITY_DN13349_c0_g1_i9.path1	novel.5958	TRINITY_DN12193_c0_g2_i1.path1	TRINITY_DN11057_c0_g2_i1.path2	novel.4757
novel.8889	TRINITY_DN18409_c0_g3_i1.path1	novel.6334	TRINITY_DN19135_c0_g3_i1.path1	TRINITY_DN60836_c0_g1_i1.path1
TRINITY_DN22779_c0_g1_i1.path1	novel.7113	Pepsico2_Contig16813.path2	novel.6334	Pepsico2_Contig12140.path1
novel.3414	TRINITY_DN10812_c0_g1_i2.path1	novel.7547	TRINITY_DN16922_c0_g1_i1.path1	TRINITY_DN33572_c0_g2_i1.path2
Pepsico2_Contig7020.path1	novel.5550	TRINITY_DN21149_c0_g3_i1.path1	TRINITY_DN37834_c0_g4_i1.path1	TRINITY_DN9918_c0_g2_i11.path1
Pepsico1_Contig3556.path1	TRINITY_DN9829_c0_g1_i3.path1	novel.1524	TRINITY_DN23908_c0_g1_i2.path1	TRINITY_DN12408_c0_g2_i2.path1
Pepsico2_Contig14991.path2	TRINITY_DN15262_c0_g1_i1.path1	Pepsico2_Contig9474.path1	novel.1099	TRINITY_DN2755_c0_g2_i1.path1
novel.7292	Pepsico2_Contig16813.path2	TRINITY_DN10366_c1_g3_i1.path1	TRINITY_DN23077_c0_g2_i1.path2	novel.403
TRINITY_DN15850_c0_g1_i2.path1	novel.4528	novel.6164	TRINITY_DN65115_c0_g1_i1.path1	TRINITY_DN13249_c0_g2_i1.path1
TRINITY_DN20136_c1_g1_i1.path1	Pepsico2_Contig14292.path1	novel.2963	TRINITY_DN3664_c0_g3_i1.path2	TRINITY_DN8494_c1_g2_i1.path1
novel.4527	TRINITY_DN17492_c0_g1_i1.path1	novel.7719	TRINITY_DN97436_c0_g1_i1.path1	novel.7425
novel.7149	Pepsico1_Contig32360.path1	novel.1355	TRINITY_DN57429_c0_g1_i1.path1	Pepsico2_Contig2961.path1
TRINITY_DN24731_c0_g1_i1.path1	novel.6199	TRINITY_DN13217_c0_g1_i1.path3	TRINITY_DN14211_c0_g1_i3.path1	TRINITY_DN19565_c0_g1_i3.path1
TRINITY_DN1502_c0_g1_i2.path1	TRINITY_DN98696_c0_g1_i1.path1	TRINITY_DN9653_c0_g2_i1.path1	TRINITY_DN32584_c0_g1_i1.path1	Pepsico2_Contig1343.path2
TRINITY_DN38303_c0_g1_i2.path1	TRINITY_DN6565_c0_g1_i3.path1	novel.4694	TRINITY_DN14541_c0_g1_i1.path2	novel.7531
Pepsico2_Contig19245.path1	novel.10531	TRINITY_DN12806_c0_g1_i1.path1	TRINITY_DN69304_c0_g1_i1.path1	TRINITY_DN28959_c0_g1_i1.path1
TRINITY_DN31456_c0_g2_i4.path2	TRINITY_DN21483_c0_g2_i3.path1	TRINITY_DN23431_c0_g1_i2.path1	novel.6191	TRINITY_DN98034_c0_g1_i1.path2
TRINITY_DN5976_c0_g1_i12.path2	TRINITY_DN19684_c1_g1_i1.path1	novel.5533	Pepsico2_Contig20617.path1	TRINITY_DN23525_c0_g2_i1.path1
TRINITY_DN26562_c0_g1_i1.path1	novel.6338	TRINITY_DN112208_c0_g1_i1.path1	novel.6059	TRINITY_DN14890_c0_g3_i1.path1
TRINITY_DN1258_c0_g4_i2.path1	TRINITY_DN13349_c0_g1_i9.path1	Pepsico2_Contig8540.path2	novel.5550	TRINITY_DN12171_c0_g1_i7.path2
novel.9528	novel.7547	TRINITY_DN25384_c0_g1_i1.path2	TRINITY_DN87130_c0_g1_i1.path1	novel.1524
novel.6051	Pepsico2_Contig12859.path1	TRINITY_DN27677_c0_g1_i2.path1	novel.10349	TRINITY_DN106693_c0_g1_i1.path1
TRINITY_DN79387_c0_g1_i1.path1	TRINITY_DN12218_c0_g1_i4.path2	novel.6051	TRINITY_DN14427_c1_g1_i1.path1	TRINITY_DN2551_c0_g2_i2.path2
novel.2764	novel.229	novel.10179	Pepsico2_Contig19697.path1	novel.9674
novel.7904	TRINITY_DN13881_c0_g2_i8.path1	Pepsico2_Contig5514.path1	TRINITY_DN78535_c0_g1_i1.path1	novel.10146
TRINITY_DN45141_c0_g1_i1.path1	Pepsico2_Contig18303.path1	novel.9384	TRINITY_DN31256_c0_g1_i1.path1	TRINITY_DN25501_c0_g1_i1.path1
novel.5550	novel.7210	novel.9695	Pepsico2_Contig2978.path2	TRINITY_DN9637_c0_g1_i4.path1
novel.7743	novel.6234	TRINITY_DN54316_c0_g1_i1.path1	TRINITY_DN5491_c1_g5_i1.path1	TRINITY_DN9608_c0_g1_i4.path2
novel.9844	novel.1510	novel.7199	TRINITY_DN31143_c0_g1_i14.path1	TRINITY_DN21288_c0_g2_i2.path1
TRINITY_DN19150_c0_g1_i2.path2	TRINITY_DN8605_c0_g1_i8.path1	novel.7453	TRINITY_DN43074_c0_g1_i1.path1	TRINITY_DN30736_c0_g1_i1.path1
novel.8920	TRINITY_DN16113_c0_g1_i1.path1	novel.4836	novel.375	TRINITY_DN45793_c0_g1_i1.path1
TRINITY_DN8896_c0_g1_i3.path2	Pepsico2_Contig8546.path1	TRINITY_DN32381_c0_g1_i1.path1	novel.9027	novel.5
TRINITY_DN23876_c1_g1_i1.path1	Pepsico2_Contig5976.path1	novel.4541	novel.3585	novel.1445
Pepsico2_Contig15299.path2	TRINITY_DN52779_c0_g1_i1.path1	TRINITY_DN3559_c0_g2_i1.path1	TRINITY_DN21149_c0_g3_i1.path1	TRINITY_DN111601_c0_g1_i1.path2
Pepsico2_Contig15519.path2	TRINITY_DN91942_c0_g1_i1.path1	novel.9027	novel.1116	TRINITY_DN4885_c0_g4_i1.path1
TRINITY_DN14129_c0_g1_i5.path3	novel.197	novel.426	TRINITY_DN34912_c0_g1_i2.path1	novel.8465
novel.348	TRINITY_DN46635_c0_g1_i3.path3	Pepsico2_Contig20718.path1	Pepsico2_Contig20373.path1	TRINITY_DN51625_c0_g1_i1.path1
TRINITY_DN65604_c0_g1_i1.path1	TRINITY_DN14583_c0_g1_i3.path1	TRINITY_DN29732_c0_g1_i1.path1	novel.6157	TRINITY_DN62350_c0_g1_i1.path1
TRINITY_DN9268_c1_g2_i1.path1	TRINITY_DN4954_c0_g2_i1.path2	TRINITY_DN38440_c0_g1_i2.path1	novel.3560	novel.6027
novel.2980	TRINITY_DN56459_c0_g1_i1.path1	novel.5667	novel.7642	Pepsico1_Contig29617.path1
TRINITY_DN23743_c0_g1_i1.path1	TRINITY_DN54033_c0_g2_i2.path2	TRINITY_DN17492_c0_g1_i1.path1	TRINITY_DN7279_c0_g3_i1.path1	TRINITY_DN15667_c0_g2_i1.path1
novel.1365	TRINITY_DN16355_c0_g1_i5.path1	TRINITY_DN19135_c0_g3_i1.path1	novel.197	TRINITY_DN10891_c1_g1_i1.path2
TRINITY_DN38216_c0_g1_i1.path1	TRINITY_DN8639_c0_g2_i1.path3	novel.9371	TRINITY_DN53070_c0_g1_i1.path2	TRINITY_DN52145_c0_g1_i1.path4
Pepsico1_Contig37863.path1	Pepsico2_Contig9474.path1	TRINITY_DN16511_c0_g1_i6.path1	TRINITY_DN26562_c0_g1_i1.path1	novel.4879
Pepsico1_Contig36346.path1	novel.2960	TRINITY_DN3299_c0_g1_i18.path1	novel.215	novel.921
novel.2360	novel.2632	novel.5950	novel.8916	TRINITY_DN94953_c0_g1_i1.path1
novel.10624	TRINITY_DN1258_c0_g9_i1.path1	novel.9808	novel.10325	novel.793
TRINITY_DN53274_c0_g1_i1.path1	Pepsico2_Contig6528.path1	Pepsico1_Contig8217.path2	novel.4048	novel.6037
Pepsico2_Contig15875.path2	TRINITY_DN101519_c0_g1_i1.path1	Pepsico2_Contig3196.path2	TRINITY_DN22391_c0_g1_i2.path1	TRINITY_DN21086_c0_g1_i1.path1
TRINITY_DN17818_c0_g1_i3.path2	Pepsico2_Contig14022.path1	novel.7165	novel.9349	novel.6072
TRINITY_DN32929_c0_g1_i1.path1	novel.3585	TRINITY_DN39335_c0_g1_i1.path1	TRINITY_DN16237_c0_g3_i1.path2	novel.1221
TRINITY_DN24505_c0_g1_i1.path1	Pepsico1_Contig3093.path1	TRINITY_DN26115_c0_g2_i3.path1	TRINITY_DN16237_c0_g1_i1.path1	novel.6216
TRINITY_DN107989_c0_g1_i1.path1	TRINITY_DN14211_c0_g1_i3.path1	Pepsico1_Contig3556.path1	TRINITY_DN9426_c0_g1_i3.path1	TRINITY_DN13881_c0_g2_i8.path2
TRINITY_DN1968_c0_g1_i4.path1	novel.4527	novel.2971	novel.8831	novel.10160
TRINITY_DN12108_c0_g2_i1.path1	TRINITY_DN27142_c0_g2_i1.path1	TRINITY_DN11668_c0_g1_i19.path1	novel.6228	novel.5064
TRINITY_DN10366_c1_g3_i1.path1	TRINITY_DN12806_c0_g1_i1.path1	novel.4668	Pepsico1_Contig5077.path1	novel.4785
TRINITY_DN23219_c0_g5_i1.path1	Pepsico1_Contig3638.path2	novel.1709	novel.1891	novel.7500
Pepsico1_Contig5775.path1	novel.8750	novel.5556	Pepsico2_Contig9973.path1	Pepsico2_Contig16099.path1
TRINITY_DN5752_c0_g1_i1.path1	Pepsico1_Contig2161.path2	TRINITY_DN9600_c0_g1_i1.path1	novel.9808	TRINITY_DN40362_c0_g1_i1.path1
Pepsico2_Contig2607.path1	novel.2808	TRINITY_DN11067_c0_g1_i1.path2	novel.7165	TRINITY_DN15612_c0_g1_i10.path3
novel.197	novel.8889	TRINITY_DN37782_c0_g2_i1.path1	TRINITY_DN10556_c0_g1_i1.path1	novel.6391
TRINITY_DN8198_c1_g1_i1.path1	Pepsico2_Contig4421.path1	TRINITY_DN10700_c0_g2_i1.path1	novel.6729	TRINITY_DN21149_c0_g3_i1.path1
TRINITY_DN6877_c0_g1_i1.path1	novel.6051	TRINITY_DN18897_c2_g1_i1.path1	novel.5257	TRINITY_DN21483_c0_g2_i3.path1
novel.3434	Pepsico2_Contig2548.path1	TRINITY_DN10686_c1_g1_i1.path1	novel.6932	TRINITY_DN26499_c0_g3_i2.path2
Pepsico2_Contig10618.path1	TRINITY_DN25384_c0_g2_i1.path3	TRINITY_DN83999_c0_g1_i1.path1	TRINITY_DN32159_c0_g1_i1.path1	TRINITY_DN76151_c0_g1_i1.path1
TRINITY_DN21802_c0_g2_i1.path1	novel.8909	novel.9029	novel.928	novel.6165
novel.9475	TRINITY_DN8484_c0_g4_i1.path1	TRINITY_DN6677_c0_g2_i2.path1	novel.793	Pepsico1_Contig33503.path2
TRINITY_DN99345_c0_g1_i1.path1	novel.3159	novel.4528	novel.67	Pepsico1_Contig14704.path1
novel.7453	novel.3908	TRINITY_DN16283_c0_g2_i1.path1	Pepsico1_Contig826.path1	TRINITY_DN102781_c0_g1_i1.path1
TRINITY_DN30795_c0_g1_i1.path1	novel.1116	TRINITY_DN49890_c0_g1_i1.path1	TRINITY_DN51625_c0_g1_i1.path1	novel.5032
TRINITY_DN23219_c0_g3_i3.path1	novel.6333	novel.7206	novel.426	TRINITY_DN22405_c0_g2_i1.path2
novel.9827	TRINITY_DN24731_c0_g1_i1.path1	TRINITY_DN45971_c0_g1_i3.path1	TRINITY_DN28719_c0_g4_i1.path1	TRINITY_DN10556_c0_g1_i1.path1
novel.2823	novel.6134	TRINITY_DN25777_c0_g1_i1.path4	TRINITY_DN18185_c0_g1_i6.path1	TRINITY_DN21683_c0_g1_i1.path1
novel.8492	novel.7121	TRINITY_DN4515_c0_g1_i17.path2	TRINITY_DN13853_c0_g1_i1.path2	novel.2460
TRINITY_DN7147_c0_g1_i3.path1	TRINITY_DN4529_c1_g1_i1.path2	novel.7474	novel.625	TRINITY_DN25461_c0_g1_i1.path2
TRINITY_DN27300_c0_g1_i1.path1	TRINITY_DN4783_c0_g2_i1.path1	TRINITY_DN4515_c0_g1_i17.path1	TRINITY_DN15788_c0_g1_i1.path1	TRINITY_DN31490_c0_g2_i1.path1
novel.9692	novel.979	TRINITY_DN13881_c0_g2_i8.path2	novel.23	TRINITY_DN29950_c0_g1_i1.path1
TRINITY_DN65319_c0_g1_i1.path1	novel.1245	Pepsico1_Contig17817.path1	novel.4785	TRINITY_DN15838_c0_g1_i1.path1
TRINITY_DN11057_c0_g2_i1.path2	novel.10160	Pepsico2_Contig19932.path1	novel.7294	TRINITY_DN47085_c0_g1_i1.path1
Pepsico2_Contig11466.path1	novel.1558	TRINITY_DN6513_c0_g2_i1.path1	novel.9384	TRINITY_DN51484_c0_g2_i1.path2
novel.5598	novel.1538	TRINITY_DN21086_c0_g1_i1.path1	novel.1177	novel.3004
novel.1224	novel.9384	TRINITY_DN112261_c0_g1_i1.path1	novel.9409	TRINITY_DN31623_c0_g1_i1.path1
TRINITY_DN31855_c0_g1_i2.path2	TRINITY_DN19075_c0_g1_i3.path1	TRINITY_DN12922_c0_g1_i4.path2	TRINITY_DN26562_c0_g2_i1.path1	TRINITY_DN8605_c0_g1_i8.path1
TRINITY_DN19296_c0_g1_i3.path1	novel.4668	novel.7670	novel.7299	TRINITY_DN13887_c0_g1_i1.path1
novel.6098	novel.349	TRINITY_DN20136_c1_g1_i1.path1	TRINITY_DN11360_c0_g1_i1.path1	novel.7303
TRINITY_DN17463_c0_g1_i3.path1	novel.473	novel.6333	TRINITY_DN26591_c0_g1_i1.path1	TRINITY_DN94969_c0_g1_i1.path1
TRINITY_DN13385_c1_g1_i3.path1	TRINITY_DN10979_c0_g2_i8.path1	Pepsico2_Contig8093.path2	novel.2511	TRINITY_DN27737_c0_g1_i1.path1
novel.2808	TRINITY_DN536_c0_g1_i1.path1	Pepsico2_Contig2458.path1	novel.4244	novel.7772
TRINITY_DN30123_c0_g1_i1.path1	TRINITY_DN42989_c1_g1_i1.path1	TRINITY_DN23584_c0_g1_i4.path2	TRINITY_DN24742_c0_g3_i1.path2	TRINITY_DN19135_c0_g1_i1.path1
novel.6685	Pepsico2_Contig17956.path1	TRINITY_DN1258_c0_g8_i1.path1	TRINITY_DN34473_c0_g1_i1.path3	TRINITY_DN9975_c0_g2_i5.path1
TRINITY_DN1921_c0_g2_i4.path1	novel.8995	TRINITY_DN16507_c0_g1_i2.path1	novel.9840	TRINITY_DN5337_c0_g1_i4.path1
TRINITY_DN26453_c0_g2_i5.path2	novel.4774	TRINITY_DN46635_c0_g1_i3.path3	novel.10146	TRINITY_DN8596_c4_g1_i1.path1
TRINITY_DN7068_c0_g1_i5.path1	TRINITY_DN87130_c0_g1_i1.path1	TRINITY_DN4252_c0_g3_i1.path2	TRINITY_DN25501_c0_g1_i1.path1	novel.8552
TRINITY_DN3429_c1_g1_i2.path1	TRINITY_DN1122_c0_g4_i2.path2	novel.1655	Pepsico2_Contig16832.path1	TRINITY_DN2490_c0_g2_i1.path2
Pepsico2_Contig2134.path1	TRINITY_DN99345_c0_g1_i1.path1	Pepsico1_Contig556.path1	TRINITY_DN27841_c0_g1_i1.path1	TRINITY_DN36478_c0_g2_i1.path1
novel.6930	novel.6027	novel.7658	TRINITY_DN11731_c0_g3_i1.path1	TRINITY_DN99636_c0_g1_i1.path1
Pepsico2_Contig7178.path1	TRINITY_DN23984_c0_g1_i1.path1	TRINITY_DN5893_c0_g1_i1.path1	novel.7884	novel.400
novel.2647	TRINITY_DN1195_c0_g5_i1.path2	TRINITY_DN21761_c0_g1_i1.path2	TRINITY_DN15712_c0_g1_i2.path1	TRINITY_DN13663_c1_g1_i1.path1
TRINITY_DN13881_c0_g2_i8.path2	TRINITY_DN55971_c0_g1_i1.path1	TRINITY_DN4488_c1_g1_i2.path1	TRINITY_DN42581_c0_g1_i1.path1	Pepsico1_Contig3579.path1
novel.6928	TRINITY_DN8095_c0_g1_i3.path1	novel.7300	TRINITY_DN99636_c0_g1_i1.path1	TRINITY_DN25217_c0_g1_i1.path1
TRINITY_DN9829_c0_g1_i3.path1	TRINITY_DN2548_c0_g1_i5.path1	TRINITY_DN43172_c0_g1_i1.path2	Pepsico1_Contig2504.path1	Pepsico2_Contig20592.path1
novel.8730	novel.793	Pepsico2_Contig2180.path1	TRINITY_DN27399_c2_g1_i1.path1	TRINITY_DN9943_c1_g1_i1.path1
TRINITY_DN51625_c0_g1_i1.path1	novel.5002	TRINITY_DN18237_c1_g3_i1.path1	novel.2863	TRINITY_DN65604_c0_g1_i1.path1
TRINITY_DN8916_c0_g2_i1.path1	TRINITY_DN12386_c0_g2_i1.path1	TRINITY_DN18638_c0_g1_i1.path1	Pepsico2_Contig8540.path2	novel.1557
novel.4459	TRINITY_DN12571_c0_g1_i13.path1	novel.4835	novel.8746	TRINITY_DN106731_c0_g1_i1.path1
Pepsico2_Contig6342.path2	novel.7299	TRINITY_DN6676_c0_g1_i1.path2	TRINITY_DN2354_c0_g1_i4.path2	TRINITY_DN25384_c0_g1_i1.path1
novel.2964	Pepsico2_Contig20393.path1	TRINITY_DN25751_c0_g1_i2.path1	Pepsico2_Contig11484.path2	TRINITY_DN3922_c0_g1_i1.path3
TRINITY_DN17599_c0_g1_i1.path1	TRINITY_DN10612_c0_g1_i14.path1	TRINITY_DN14953_c0_g1_i3.path1	TRINITY_DN17278_c1_g1_i1.path1	novel.7842
novel.8632	Pepsico1_Contig7138.path1	novel.83	novel.4517	novel.5079
novel.3585	Pepsico2_Contig12464.path1	TRINITY_DN27067_c1_g1_i1.path1	TRINITY_DN15509_c2_g1_i1.path2	Pepsico1_Contig37632.path2
Pepsico2_Contig2458.path1	novel.3595	TRINITY_DN11265_c0_g1_i9.path1	TRINITY_DN6979_c0_g1_i6.path1	TRINITY_DN30818_c0_g1_i1.path1
TRINITY_DN13092_c0_g1_i4.path1	novel.7300	TRINITY_DN101519_c0_g1_i1.path1	novel.5064	novel.620
TRINITY_DN34600_c0_g1_i1.path1	TRINITY_DN10366_c1_g3_i1.path1	novel.2632	novel.7633	TRINITY_DN35708_c0_g1_i1.path1
TRINITY_DN18663_c0_g3_i1.path1	TRINITY_DN83999_c0_g1_i1.path1	TRINITY_DN87130_c0_g1_i1.path1	TRINITY_DN54033_c0_g2_i2.path2	novel.6138
TRINITY_DN87130_c0_g1_i1.path1	novel.83	TRINITY_DN2548_c0_g1_i5.path1	novel.10160	TRINITY_DN65319_c0_g1_i1.path1
TRINITY_DN54316_c0_g1_i1.path1	TRINITY_DN36403_c0_g4_i2.path1	novel.1892	TRINITY_DN48193_c0_g1_i1.path1	TRINITY_DN64736_c0_g1_i1.path2
Pepsico2_Contig17149.path2	TRINITY_DN15712_c0_g1_i2.path1	TRINITY_DN16522_c0_g1_i3.path2	Pepsico1_Contig5854.path2	novel.774
Pepsico2_Contig12952.path2	novel.9475	Pepsico2_Contig15299.path2	Pepsico1_Contig3556.path1	novel.6341
TRINITY_DN18123_c0_g1_i6.path1	Pepsico1_Contig2674.path1	TRINITY_DN107989_c0_g1_i1.path1	novel.4761	TRINITY_DN11035_c0_g3_i5.path1
TRINITY_DN87787_c0_g1_i1.path1	novel.2971	TRINITY_DN582_c2_g1_i6.path2	TRINITY_DN21483_c0_g2_i3.path1	TRINITY_DN106173_c0_g1_i1.path1
novel.4464	TRINITY_DN12408_c4_g1_i1.path1	TRINITY_DN16357_c0_g3_i1.path1	novel.210	novel.1510
TRINITY_DN8756_c10_g1_i1.path1	novel.660	novel.1115	Pepsico2_Contig14015.path1	novel.386
novel.3040	TRINITY_DN23525_c0_g2_i1.path1	novel.5367	novel.2676	novel.2559
novel.5813	TRINITY_DN29732_c0_g1_i1.path1	Pepsico2_Contig12155.path1	TRINITY_DN10621_c0_g1_i7.path1	Pepsico2_Contig2408.path3
TRINITY_DN40249_c0_g1_i1.path1	TRINITY_DN43172_c0_g1_i1.path2	TRINITY_DN38413_c0_g1_i1.path1	TRINITY_DN8596_c4_g1_i1.path1	TRINITY_DN19898_c0_g5_i2.path1
Pepsico2_Contig9071.path1	TRINITY_DN2490_c0_g2_i1.path2	TRINITY_DN8198_c1_g1_i1.path1	TRINITY_DN18634_c0_g1_i6.path1	TRINITY_DN24920_c1_g1_i1.path1
Pepsico2_Contig14792.path2	novel.9016	TRINITY_DN33167_c0_g1_i2.path1	Pepsico1_Contig340.path2	novel.4464
TRINITY_DN61850_c0_g1_i1.path2	novel.6818	TRINITY_DN8820_c0_g1_i1.path1	TRINITY_DN26343_c0_g2_i1.path2	novel.2288
novel.1115	Pepsico1_Contig5655.path1	TRINITY_DN37160_c0_g1_i1.path1	TRINITY_DN30714_c0_g1_i2.path1	TRINITY_DN30719_c0_g1_i1.path2
TRINITY_DN17710_c0_g1_i1.path1	Pepsico2_Contig11667.path1	TRINITY_DN8925_c0_g1_i1.path1	TRINITY_DN14202_c3_g1_i1.path1	TRINITY_DN1240_c0_g2_i1.path2
TRINITY_DN1092_c1_g1_i1.path2	TRINITY_DN82762_c0_g1_i1.path1	Pepsico2_Contig5976.path1	Pepsico1_Contig1695.path1	novel.1731
TRINITY_DN60836_c0_g1_i1.path1	TRINITY_DN30361_c0_g1_i2.path1	TRINITY_DN24742_c0_g3_i1.path2	TRINITY_DN10686_c1_g1_i1.path1	novel.3196
novel.2997	Pepsico2_Contig6148.path1	Pepsico2_Contig16099.path1	Pepsico2_Contig5745.path1	Pepsico1_Contig3833.path2
Pepsico1_Contig31806.path1	TRINITY_DN32929_c0_g1_i1.path1	TRINITY_DN30714_c0_g1_i2.path1	TRINITY_DN11880_c0_g1_i1.path3	novel.3378
TRINITY_DN92130_c0_g1_i1.path1	novel.10099	TRINITY_DN21288_c0_g2_i2.path1	TRINITY_DN9608_c0_g1_i4.path2	novel.8079
TRINITY_DN17993_c0_g1_i5.path1	novel.4509	novel.346	TRINITY_DN10891_c1_g1_i1.path1	Pepsico2_Contig4927.path1
TRINITY_DN6722_c0_g1_i1.path1	novel.9808	TRINITY_DN6808_c0_g3_i1.path2	novel.87	Pepsico1_Contig32400.path1
Pepsico2_Contig3356.path1	novel.2	novel.8875	novel.9371	Pepsico1_Contig36309.path1
novel.6079	novel.2582	novel.8889	Pepsico2_Contig8195.path2	novel.9510
TRINITY_DN98679_c0_g1_i1.path1	Pepsico1_Contig3571.path1	TRINITY_DN37508_c0_g2_i1.path1	TRINITY_DN18897_c2_g1_i1.path1	TRINITY_DN16507_c0_g1_i2.path1
TRINITY_DN83655_c0_g1_i1.path1	TRINITY_DN56541_c0_g1_i1.path1	TRINITY_DN15612_c0_g1_i10.path3	TRINITY_DN24254_c0_g1_i2.path1	novel.5969
TRINITY_DN29507_c0_g1_i2.path1	novel.315	TRINITY_DN9814_c1_g1_i2.path2	TRINITY_DN54399_c0_g1_i1.path2	novel.6159
novel.8797	novel.3187	Pepsico2_Contig19245.path1	novel.6079	TRINITY_DN83999_c0_g1_i1.path1
TRINITY_DN23525_c0_g2_i1.path1	Pepsico2_Contig6486.path1	novel.1177	TRINITY_DN101519_c0_g1_i1.path1	novel.9390
TRINITY_DN16411_c0_g1_i5.path1	novel.5163	novel.51	novel.836	novel.5798
TRINITY_DN9373_c0_g1_i6.path1	TRINITY_DN50072_c0_g1_i1.path1	TRINITY_DN17599_c0_g1_i1.path1	novel.7425	TRINITY_DN32157_c1_g1_i2.path1
TRINITY_DN26449_c0_g1_i1.path2	TRINITY_DN26957_c0_g1_i1.path1	TRINITY_DN34274_c0_g1_i1.path1	TRINITY_DN19135_c0_g1_i1.path1	TRINITY_DN11406_c0_g1_i1.path2
TRINITY_DN10686_c1_g1_i1.path1	TRINITY_DN89062_c0_g1_i1.path1	novel.1538	TRINITY_DN45898_c0_g1_i3.path3	novel.6937
novel.6157	Pepsico1_Contig4308.path1	novel.8942	TRINITY_DN9653_c0_g2_i1.path1	TRINITY_DN8992_c0_g2_i1.path1
TRINITY_DN25461_c0_g1_i1.path1	Pepsico2_Contig20286.path2	TRINITY_DN19732_c1_g1_i2.path1	TRINITY_DN12171_c0_g1_i7.path2	TRINITY_DN25489_c0_g1_i1.path1
TRINITY_DN11076_c0_g1_i1.path1	TRINITY_DN1240_c0_g2_i1.path2	TRINITY_DN71605_c0_g1_i1.path1	TRINITY_DN29528_c0_g1_i1.path1	TRINITY_DN35061_c1_g1_i2.path1
TRINITY_DN30706_c0_g1_i2.path1	TRINITY_DN69493_c0_g1_i1.path1	novel.7345	TRINITY_DN62350_c0_g1_i1.path1	TRINITY_DN37797_c0_g2_i1.path1
TRINITY_DN31771_c0_g3_i1.path1	TRINITY_DN7964_c0_g1_i2.path1	novel.10349	TRINITY_DN26115_c0_g2_i3.path1	novel.4459
TRINITY_DN26562_c0_g2_i1.path1	novel.9698	novel.2648	TRINITY_DN9920_c0_g1_i11.path1	TRINITY_DN75397_c0_g1_i1.path3
novel.474	TRINITY_DN26562_c0_g2_i1.path1	TRINITY_DN94912_c0_g1_i1.path1	TRINITY_DN1502_c0_g4_i1.path1	novel.5972
TRINITY_DN4456_c0_g2_i10.path2	Pepsico2_Contig20430.path1	novel.107	novel.7840	novel.10562
novel.1558	Pepsico2_Contig20183.path1	TRINITY_DN25501_c0_g1_i1.path1	TRINITY_DN4027_c5_g1_i1.path3	TRINITY_DN59511_c0_g1_i1.path1
TRINITY_DN36154_c1_g1_i1.path2	novel.7474	novel.4509	TRINITY_DN34205_c0_g1_i1.path3	TRINITY_DN20519_c0_g1_i1.path1
TRINITY_DN1148_c0_g1_i2.path1	novel.3004	TRINITY_DN92905_c0_g1_i1.path2	novel.10177	TRINITY_DN112208_c0_g1_i1.path1
novel.6134	Pepsico1_Contig6988.path1	Pepsico2_Contig6378.path1	TRINITY_DN88746_c0_g1_i1.path1	TRINITY_DN8753_c0_g1_i3.path1
TRINITY_DN15375_c0_g1_i2.path1	TRINITY_DN98936_c0_g1_i1.path1	TRINITY_DN5970_c0_g2_i1.path2	novel.5667	TRINITY_DN13745_c0_g1_i7.path1
Pepsico2_Contig7517.path2	TRINITY_DN25826_c0_g2_i1.path1	TRINITY_DN34598_c0_g1_i2.path1	Pepsico1_Contig721.path1	TRINITY_DN11478_c0_g1_i4.path2
Pepsico2_Contig10529.path2	Pepsico2_Contig19669.path1	novel.7842	Pepsico2_Contig9474.path1	novel.8204
novel.5673	TRINITY_DN15612_c0_g1_i10.path3	novel.8916	TRINITY_DN12758_c2_g2_i1.path1	novel.1924
TRINITY_DN30783_c0_g1_i6.path1	novel.6151	novel.7336	TRINITY_DN23034_c0_g1_i1.path1	TRINITY_DN3559_c0_g2_i1.path1
TRINITY_DN52679_c0_g1_i1.path2	novel.4459	TRINITY_DN1195_c0_g5_i1.path2	TRINITY_DN18829_c1_g1_i1.path2	novel.4244
TRINITY_DN12913_c0_g3_i1.path1	TRINITY_DN24768_c0_g2_i1.path1	novel.349	TRINITY_DN112208_c0_g1_i1.path1	novel.1343
TRINITY_DN44840_c1_g1_i1.path5	TRINITY_DN31143_c0_g1_i14.path1	TRINITY_DN15354_c1_g2_i1.path1	novel.5683	TRINITY_DN6979_c0_g1_i6.path1
TRINITY_DN57903_c0_g2_i1.path5	TRINITY_DN10059_c0_g2_i4.path1	TRINITY_DN111423_c0_g1_i1.path1	Pepsico2_Contig10040.path1	TRINITY_DN10891_c0_g1_i1.path3
novel.2988	TRINITY_DN34473_c0_g1_i1.path3	TRINITY_DN53177_c0_g1_i3.path2	novel.7155	TRINITY_DN16237_c0_g3_i1.path2
TRINITY_DN109564_c0_g1_i1.path1	TRINITY_DN27_c3_g1_i1.path1	novel.6649	Pepsico2_Contig18100.path2	TRINITY_DN2337_c0_g1_i6.path2
TRINITY_DN20418_c0_g1_i1.path1	novel.10007	TRINITY_DN23219_c0_g5_i1.path1	TRINITY_DN10979_c0_g2_i8.path1	TRINITY_DN1258_c0_g4_i2.path1
novel.9027	TRINITY_DN506_c0_g1_i4.path2	TRINITY_DN1380_c0_g1_i2.path2	TRINITY_DN15354_c1_g2_i1.path1	novel.3059
Pepsico1_Contig30037.path1	TRINITY_DN11195_c1_g1_i1.path2	TRINITY_DN20519_c0_g1_i1.path1	novel.7158	TRINITY_DN12238_c0_g3_i1.path1
novel.2853	novel.8207	TRINITY_DN57429_c0_g1_i1.path1	TRINITY_DN43549_c0_g1_i1.path2	Pepsico1_Contig6775.path1
novel.8116	novel.3196	TRINITY_DN12086_c0_g2_i2.path1	TRINITY_DN16393_c0_g1_i1.path1	Pepsico2_Contig2570.path3
TRINITY_DN22497_c1_g2_i1.path1	TRINITY_DN7275_c0_g2_i2.path1	novel.1368	TRINITY_DN20295_c0_g1_i3.path1	TRINITY_DN64431_c0_g1_i3.path1
TRINITY_DN4954_c0_g2_i1.path2	novel.9920	TRINITY_DN47488_c0_g2_i1.path1	TRINITY_DN12806_c0_g1_i1.path1	TRINITY_DN12806_c0_g1_i1.path1
TRINITY_DN5439_c0_g1_i1.path1	novel.7165	TRINITY_DN14475_c0_g2_i3.path1	TRINITY_DN23525_c0_g2_i1.path1	TRINITY_DN19684_c1_g1_i1.path1
novel.1510	novel.1368	Pepsico1_Contig2504.path1	TRINITY_DN55122_c0_g1_i1.path4	TRINITY_DN7934_c2_g1_i7.path1
novel.4469	TRINITY_DN31207_c0_g1_i1.path1	novel.2964	TRINITY_DN40822_c0_g1_i1.path2	TRINITY_DN30446_c0_g1_i1.path2
novel.8327	Pepsico2_Contig19460.path2	TRINITY_DN11357_c0_g1_i1.path1	novel.5203	TRINITY_DN4449_c0_g1_i3.path1
novel.8204	TRINITY_DN75642_c0_g1_i1.path1	novel.751	TRINITY_DN10815_c0_g2_i1.path1	TRINITY_DN13940_c0_g1_i1.path1
TRINITY_DN23984_c0_g1_i1.path1	novel.8315	novel.7294	TRINITY_DN19259_c1_g1_i1.path1	TRINITY_DN79972_c0_g1_i1.path1
TRINITY_DN25826_c0_g2_i1.path1	Pepsico2_Contig5798.path1	novel.3651	TRINITY_DN53070_c0_g1_i1.path1	novel.1372
Pepsico2_Contig12464.path1	novel.8987	TRINITY_DN85720_c0_g1_i1.path3	novel.2959	novel.7771
TRINITY_DN11360_c0_g1_i1.path1	TRINITY_DN98034_c0_g1_i1.path2	TRINITY_DN25217_c0_g1_i1.path1	TRINITY_DN19880_c0_g1_i1.path1	TRINITY_DN62021_c0_g1_i1.path1
TRINITY_DN89619_c0_g1_i1.path1	TRINITY_DN20519_c0_g1_i1.path1	TRINITY_DN105250_c0_g1_i1.path3	TRINITY_DN25628_c0_g1_i1.path1	TRINITY_DN65545_c0_g1_i1.path1
TRINITY_DN11705_c0_g1_i1.path1	TRINITY_DN19565_c0_g1_i3.path1	Pepsico1_Contig1451.path1	Pepsico1_Contig3839.path1	TRINITY_DN10366_c1_g3_i1.path1
Pepsico1_Contig7140.path1	TRINITY_DN58767_c0_g1_i1.path1	novel.9370	TRINITY_DN16918_c0_g1_i7.path2	TRINITY_DN10863_c0_g1_i3.path2
novel.83	novel.1524	TRINITY_DN23034_c0_g1_i1.path1	TRINITY_DN23219_c0_g5_i1.path1	TRINITY_DN12767_c0_g1_i2.path1
TRINITY_DN4494_c0_g2_i2.path1	TRINITY_DN21802_c0_g2_i1.path1	novel.7735	TRINITY_DN15612_c0_g1_i10.path3	novel.6045
novel.63	novel.9021	TRINITY_DN1968_c0_g1_i4.path1	TRINITY_DN51140_c0_g1_i1.path1	novel.2760
TRINITY_DN5322_c0_g2_i1.path1	TRINITY_DN15354_c1_g2_i1.path1	TRINITY_DN77068_c0_g1_i1.path2	TRINITY_DN11538_c0_g2_i1.path1	novel.3159
TRINITY_DN32251_c0_g1_i1.path1	Pepsico1_Contig7140.path1	TRINITY_DN88881_c0_g1_i1.path1	TRINITY_DN29950_c0_g1_i1.path1	novel.4500
TRINITY_DN9204_c0_g2_i4.path1	TRINITY_DN88746_c0_g1_i1.path1	TRINITY_DN86093_c0_g1_i1.path1	novel.8138	TRINITY_DN92110_c0_g1_i1.path1
Pepsico1_Contig5362.path2	Pepsico2_Contig18542.path1	TRINITY_DN24412_c0_g1_i5.path1	TRINITY_DN12758_c1_g2_i1.path3	TRINITY_DN10686_c1_g1_i1.path1
novel.7299	novel.1517	Pepsico2_Contig12951.path1	TRINITY_DN37195_c1_g1_i1.path2	novel.7021
novel.5667	TRINITY_DN27316_c0_g1_i2.path1	TRINITY_DN19075_c0_g1_i3.path1	TRINITY_DN101247_c0_g1_i1.path2	TRINITY_DN20324_c0_g1_i1.path1
TRINITY_DN7926_c3_g1_i1.path1	TRINITY_DN25777_c0_g1_i1.path4	novel.5932	novel.3159	novel.7229
Pepsico2_Contig20185.path1	TRINITY_DN9608_c0_g2_i2.path2	Pepsico2_Contig7478.path1	TRINITY_DN40817_c0_g1_i1.path1	TRINITY_DN19110_c0_g3_i1.path1
TRINITY_DN26499_c0_g3_i2.path2	Pepsico2_Contig8385.path1	novel.4450	TRINITY_DN50909_c0_g1_i1.path1	novel.9027
novel.7474	TRINITY_DN17599_c0_g1_i1.path1	TRINITY_DN10288_c0_g1_i1.path2	Pepsico2_Contig3961.path1	TRINITY_DN13542_c0_g1_i1.path2
novel.9394	TRINITY_DN2180_c0_g1_i3.path1	TRINITY_DN5439_c0_g1_i1.path1	TRINITY_DN38810_c0_g2_i2.path1	TRINITY_DN25384_c0_g1_i1.path2
TRINITY_DN16570_c0_g1_i4.path1	TRINITY_DN2657_c0_g1_i2.path1	TRINITY_DN11548_c0_g1_i5.path1	TRINITY_DN3429_c1_g1_i2.path1	TRINITY_DN73289_c0_g1_i1.path1
novel.7175	novel.9371	TRINITY_DN22129_c0_g4_i1.path2	Pepsico2_Contig11020.path1	TRINITY_DN17309_c0_g1_i8.path2
Pepsico1_Contig4097.path1	novel.7125	TRINITY_DN7064_c1_g1_i4.path1	novel.7670	TRINITY_DN22358_c0_g1_i2.path1
TRINITY_DN10295_c0_g2_i1.path1	TRINITY_DN22767_c0_g1_i1.path4	TRINITY_DN54033_c0_g2_i2.path2	Pepsico2_Contig3632.path2	Pepsico1_Contig2504.path1
TRINITY_DN55971_c0_g1_i1.path1	TRINITY_DN16393_c0_g1_i1.path1	novel.1348	novel.2123	novel.932
TRINITY_DN54033_c0_g2_i2.path2	TRINITY_DN40642_c0_g1_i1.path3	TRINITY_DN18924_c0_g1_i1.path1	TRINITY_DN15838_c0_g1_i1.path1	TRINITY_DN32500_c0_g1_i1.path1
TRINITY_DN53146_c0_g1_i2.path1	TRINITY_DN5816_c1_g1_i1.path1	TRINITY_DN12387_c0_g1_i1.path1	TRINITY_DN13646_c0_g1_i1.path1	novel.5748
TRINITY_DN13887_c0_g1_i1.path1	TRINITY_DN9608_c0_g1_i4.path2	novel.5924	novel.3720	TRINITY_DN20136_c1_g1_i1.path1
TRINITY_DN37891_c0_g3_i1.path1	novel.8224	TRINITY_DN18185_c0_g1_i6.path1	novel.5924	TRINITY_DN11825_c1_g3_i1.path1
novel.6151	TRINITY_DN588_c0_g2_i1.path1	TRINITY_DN34261_c0_g1_i1.path1	TRINITY_DN8753_c0_g1_i3.path1	TRINITY_DN4050_c1_g1_i10.path1
TRINITY_DN1380_c0_g1_i2.path2	novel.1770	TRINITY_DN12571_c0_g1_i13.path1	TRINITY_DN8198_c1_g1_i1.path1	Pepsico2_Contig19932.path1
novel.10329	novel.6930	Pepsico2_Contig15659.path2	TRINITY_DN21044_c2_g1_i1.path3	novel.1891
TRINITY_DN17803_c1_g2_i1.path1	novel.6164	TRINITY_DN10794_c1_g1_i3.path1	TRINITY_DN27142_c0_g2_i1.path1	novel.972
TRINITY_DN16918_c0_g1_i7.path2	novel.5224	novel.3253	novel.6031	novel.2676
novel.3180	Pepsico1_Contig27163.path2	TRINITY_DN8114_c0_g1_i6.path1	TRINITY_DN4606_c0_g2_i1.path1	novel.1365
TRINITY_DN64120_c0_g1_i1.path1	TRINITY_DN33167_c0_g1_i2.path1	novel.1770	TRINITY_DN2585_c2_g1_i1.path2	TRINITY_DN12383_c0_g1_i2.path1
TRINITY_DN31614_c0_g1_i3.path1	TRINITY_DN11785_c1_g1_i1.path1	novel.1558	Pepsico1_Contig34285.path1	Pepsico1_Contig34145.path1
TRINITY_DN13653_c0_g1_i2.path1	TRINITY_DN8753_c0_g1_i3.path1	TRINITY_DN99345_c0_g1_i1.path1	novel.8536	TRINITY_DN10750_c0_g1_i2.path1
novel.8458	TRINITY_DN8122_c0_g1_i5.path1	novel.229	TRINITY_DN31317_c1_g1_i2.path1	novel.6055
Pepsico1_Contig1649.path1	novel.8327	Pepsico1_Contig3108.path2	Pepsico2_Contig9614.path3	novel.2583
TRINITY_DN53177_c0_g1_i3.path2	TRINITY_DN53146_c0_g1_i2.path1	Pepsico2_Contig10852.path2	novel.3688	TRINITY_DN95630_c0_g1_i1.path1
novel.8746	Pepsico2_Contig11059.path1	TRINITY_DN7838_c0_g1_i2.path1	novel.4191	TRINITY_DN43172_c0_g1_i1.path2
Pepsico2_Contig3671.path1	novel.1537	TRINITY_DN26581_c0_g1_i1.path1	novel.2831	TRINITY_DN26074_c0_g1_i1.path1
Pepsico2_Contig12299.path1	TRINITY_DN31623_c1_g1_i1.path1	novel.7743	Pepsico2_Contig9071.path1	Pepsico2_Contig9970.path1
novel.9682	TRINITY_DN95555_c0_g1_i1.path1	TRINITY_DN1258_c0_g8_i1.path2	TRINITY_DN588_c0_g2_i1.path1	TRINITY_DN14238_c1_g1_i1.path1
TRINITY_DN83545_c0_g1_i1.path1	novel.360	novel.9302	novel.8313	TRINITY_DN23948_c0_g1_i1.path1
TRINITY_DN41659_c0_g1_i1.path1	TRINITY_DN13542_c0_g1_i1.path2	TRINITY_DN55073_c0_g1_i1.path1	TRINITY_DN4595_c0_g3_i1.path2	novel.3660
novel.10542	TRINITY_DN27290_c0_g1_i1.path1	novel.10146	TRINITY_DN56459_c0_g1_i1.path1	Pepsico2_Contig14019.path1
TRINITY_DN50909_c0_g1_i1.path1	TRINITY_DN15850_c0_g1_i2.path1	novel.8181	Pepsico2_Contig12952.path2	TRINITY_DN109518_c0_g1_i1.path3
TRINITY_DN20156_c0_g1_i2.path2	novel.7670	TRINITY_DN16237_c0_g5_i1.path2	TRINITY_DN19764_c0_g1_i1.path1	novel.6079
novel.403	TRINITY_DN49442_c0_g1_i1.path1	TRINITY_DN16393_c0_g1_i1.path1	novel.4668	TRINITY_DN5821_c0_g1_i8.path2
novel.7639	TRINITY_DN16513_c0_g1_i5.path1	Pepsico2_Contig11466.path1	TRINITY_DN8587_c1_g1_i1.path1	Pepsico2_Contig8532.path2
Pepsico2_Contig2921.path1	novel.2648	novel.7326	TRINITY_DN15065_c0_g2_i1.path1	TRINITY_DN26746_c0_g1_i1.path1
Pepsico2_Contig18276.path1	TRINITY_DN10826_c0_g1_i2.path1	TRINITY_DN14667_c0_g2_i5.path2	novel.4879	TRINITY_DN17599_c0_g1_i1.path1
TRINITY_DN22833_c0_g3_i3.path1	Pepsico2_Contig19530.path1	TRINITY_DN36403_c0_g4_i2.path1	TRINITY_DN5122_c0_g1_i5.path1	TRINITY_DN3299_c0_g1_i18.path1
TRINITY_DN25639_c0_g1_i1.path1	novel.4758	Pepsico2_Contig2978.path2	TRINITY_DN9971_c0_g1_i1.path1	novel.811
TRINITY_DN7897_c2_g1_i3.path1	novel.5747	TRINITY_DN8596_c0_g6_i2.path2	novel.2583	TRINITY_DN4463_c0_g1_i6.path1
TRINITY_DN105715_c0_g1_i1.path1	TRINITY_DN50492_c0_g2_i1.path2	novel.6330	novel.267	Pepsico1_Contig1024.path1
TRINITY_DN6829_c1_g1_i1.path1	TRINITY_DN8198_c1_g1_i1.path1	TRINITY_DN20875_c0_g1_i1.path2	TRINITY_DN69132_c0_g1_i1.path1	novel.508
TRINITY_DN21690_c0_g2_i2.path1	Pepsico1_Contig4897.path1	novel.7299	TRINITY_DN102817_c0_g1_i1.path1	Pepsico2_Contig8726.path1
TRINITY_DN91774_c0_g1_i1.path1	novel.9227	novel.9475	TRINITY_DN9608_c0_g2_i2.path2	TRINITY_DN9148_c0_g1_i1.path2
Pepsico1_Contig8217.path2	novel.1651	TRINITY_DN22833_c0_g3_i3.path1	TRINITY_DN15032_c0_g1_i1.path2	novel.6716
novel.7132	TRINITY_DN11017_c0_g2_i4.path3	TRINITY_DN49704_c0_g1_i1.path1	novel.6146	TRINITY_DN26449_c0_g1_i1.path2
TRINITY_DN50836_c0_g1_i1.path1	TRINITY_DN20097_c0_g1_i1.path1	TRINITY_DN29879_c0_g1_i4.path1	TRINITY_DN36978_c0_g1_i1.path1	TRINITY_DN67225_c0_g1_i1.path4
TRINITY_DN16511_c0_g1_i6.path1	TRINITY_DN27841_c0_g1_i1.path1	novel.5813	TRINITY_DN52679_c0_g1_i1.path2	Pepsico1_Contig32793.path1
TRINITY_DN39197_c0_g1_i5.path1	TRINITY_DN23273_c0_g1_i2.path1	Pepsico2_Contig17550.path2	novel.9387	novel.8928
Pepsico2_Contig19917.path4	novel.9627	TRINITY_DN30123_c0_g1_i1.path1	TRINITY_DN37782_c0_g2_i1.path1	TRINITY_DN19079_c0_g1_i1.path1
Pepsico2_Contig17919.path1	novel.10177	Pepsico1_Contig2674.path1	TRINITY_DN6578_c0_g1_i14.path3	TRINITY_DN26591_c0_g1_i1.path1
TRINITY_DN21556_c0_g1_i1.path2	Pepsico1_Contig30037.path1	Pepsico1_Contig28824.path2	TRINITY_DN26530_c1_g1_i1.path1	TRINITY_DN41708_c0_g2_i6.path1
novel.1891	TRINITY_DN25461_c0_g1_i1.path1	novel.348	novel.7466	TRINITY_DN39072_c0_g1_i1.path2
TRINITY_DN15712_c0_g1_i2.path1	Pepsico2_Contig8853.path1	TRINITY_DN15838_c0_g1_i1.path1	TRINITY_DN13705_c0_g3_i1.path2	TRINITY_DN80213_c0_g1_i1.path1
TRINITY_DN20519_c0_g1_i1.path1	TRINITY_DN2852_c0_g1_i3.path2	Pepsico1_Contig3093.path1	novel.972	Pepsico2_Contig6836.path1
novel.8141	Pepsico1_Contig2324.path2	novel.625	Pepsico2_Contig14570.path1	novel.4346
TRINITY_DN42661_c0_g1_i1.path3	novel.5220	TRINITY_DN25628_c0_g1_i1.path1	novel.1711	Pepsico2_Contig13814.path1
novel.1524	TRINITY_DN12193_c0_g2_i1.path1	TRINITY_DN16192_c0_g1_i1.path1	TRINITY_DN52145_c0_g1_i1.path4	TRINITY_DN11731_c0_g3_i1.path1
TRINITY_DN24254_c0_g1_i2.path1	TRINITY_DN13035_c0_g1_i13.path1	TRINITY_DN53472_c0_g1_i1.path1	TRINITY_DN62021_c0_g1_i1.path1	TRINITY_DN9384_c0_g1_i3.path1
TRINITY_DN3106_c1_g1_i1.path1	novel.787	novel.6199	TRINITY_DN7319_c0_g3_i1.path2	novel.7642
novel.7502	Pepsico1_Contig37632.path2	TRINITY_DN249_c1_g1_i1.path1	novel.1365	TRINITY_DN108784_c0_g1_i1.path2
TRINITY_DN12913_c0_g4_i1.path1	TRINITY_DN1380_c0_g1_i2.path2	novel.5220	novel.7021	TRINITY_DN21106_c0_g1_i1.path3
TRINITY_DN2389_c0_g1_i4.path1	TRINITY_DN9335_c0_g1_i7.path2	novel.2513	TRINITY_DN23092_c2_g1_i1.path1	TRINITY_DN23463_c1_g1_i1.path1
novel.8535	TRINITY_DN5337_c0_g1_i4.path1	TRINITY_DN22358_c0_g1_i2.path1	novel.7712	novel.5974
TRINITY_DN45363_c0_g1_i1.path2	TRINITY_DN21860_c1_g1_i1.path1	TRINITY_DN7279_c0_g3_i1.path1	TRINITY_DN32157_c1_g1_i2.path1	novel.5146
novel.1363	novel.1120	TRINITY_DN9608_c0_g2_i2.path2	Pepsico1_Contig3579.path1	TRINITY_DN16355_c0_g1_i5.path1
TRINITY_DN11608_c2_g1_i1.path1	TRINITY_DN32319_c0_g1_i1.path1	Pepsico2_Contig7839.path1	TRINITY_DN4944_c0_g2_i1.path1	novel.3394
TRINITY_DN52145_c0_g1_i1.path4	TRINITY_DN38413_c0_g1_i1.path1	TRINITY_DN36562_c0_g1_i1.path2	TRINITY_DN17309_c0_g1_i8.path2	novel.4018
TRINITY_DN9734_c0_g2_i1.path1	TRINITY_DN5322_c0_g2_i1.path1	Pepsico2_Contig18303.path1	novel.7847	novel.9387
TRINITY_DN1122_c0_g4_i2.path2	Pepsico2_Contig12412.path1	novel.3180	TRINITY_DN8670_c1_g1_i8.path2	Pepsico1_Contig1795.path2
Pepsico2_Contig8556.path2	novel.107	Pepsico2_Contig17047.path1	novel.921	novel.9016
TRINITY_DN9814_c1_g1_i2.path2	novel.8005	novel.3414	Pepsico2_Contig5727.path3	TRINITY_DN17530_c0_g1_i1.path2
novel.10460	TRINITY_DN61198_c0_g1_i1.path1	TRINITY_DN39189_c1_g1_i3.path1	Pepsico2_Contig12464.path1	novel.7138
TRINITY_DN12126_c0_g1_i1.path2	novel.7858	Pepsico1_Contig37885.path1	novel.9266	TRINITY_DN18991_c0_g2_i4.path1
novel.918	TRINITY_DN18193_c0_g2_i1.path2	novel.972	Pepsico1_Contig1795.path1	TRINITY_DN32602_c0_g1_i1.path2
TRINITY_DN6494_c0_g1_i1.path1	Pepsico2_Contig7596.path1	TRINITY_DN4027_c0_g5_i1.path2	novel.9589	novel.5942
TRINITY_DN102464_c0_g1_i1.path2	TRINITY_DN3299_c0_g1_i18.path1	TRINITY_DN16918_c0_g1_i7.path2	TRINITY_DN13899_c0_g1_i7.path1	TRINITY_DN9600_c0_g1_i1.path1
novel.10177	Pepsico2_Contig14690.path1	TRINITY_DN21352_c0_g2_i1.path1	novel.5367	TRINITY_DN18409_c0_g3_i1.path1
TRINITY_DN51761_c3_g2_i3.path1	TRINITY_DN16357_c0_g3_i1.path1	Pepsico2_Contig3417.path1	TRINITY_DN13217_c0_g1_i1.path3	Pepsico2_Contig15428.path1
novel.8995	TRINITY_DN576_c0_g3_i8.path2	TRINITY_DN34473_c0_g1_i1.path3	TRINITY_DN38763_c0_g1_i1.path1	novel.5367
TRINITY_DN25471_c0_g1_i4.path1	novel.4464	TRINITY_DN588_c0_g2_i1.path1	TRINITY_DN38440_c0_g1_i2.path1	TRINITY_DN61383_c0_g1_i2.path1
novel.7425	Pepsico2_Contig8115.path1	TRINITY_DN20282_c0_g1_i3.path1	TRINITY_DN29788_c0_g2_i1.path1	TRINITY_DN45363_c0_g1_i1.path2
novel.7836	TRINITY_DN59441_c0_g1_i2.path3	novel.6932	novel.5220	TRINITY_DN31614_c0_g1_i3.path1
novel.8224	novel.203	TRINITY_DN90969_c0_g1_i1.path1	novel.5163	novel.2699
novel.181	novel.10624	novel.10538	TRINITY_DN11067_c0_g1_i1.path2	TRINITY_DN23584_c0_g1_i4.path2
TRINITY_DN32683_c0_g1_i1.path1	TRINITY_DN21963_c0_g5_i1.path1	novel.5224	Pepsico1_Contig312.path1	TRINITY_DN38810_c0_g2_i2.path1
Pepsico1_Contig6958.path2	novel.7735	novel.8207	TRINITY_DN68386_c0_g1_i1.path1	novel.7462
novel.2971	Pepsico2_Contig14412.path3	TRINITY_DN22405_c0_g2_i1.path2	TRINITY_DN20153_c1_g1_i1.path1	novel.979
Pepsico2_Contig4522.path1	TRINITY_DN14953_c0_g1_i3.path1	TRINITY_DN19219_c0_g1_i1.path1	Pepsico2_Contig9614.path2	Pepsico1_Contig3870.path2
TRINITY_DN14779_c0_g2_i1.path1	TRINITY_DN25501_c0_g1_i1.path1	TRINITY_DN79890_c0_g1_i1.path1	novel.7345	TRINITY_DN7319_c0_g3_i1.path2
TRINITY_DN19075_c0_g1_i3.path1	novel.181	TRINITY_DN29865_c0_g1_i1.path1	novel.3087	Pepsico1_Contig17817.path1
TRINITY_DN6550_c0_g1_i1.path3	novel.7500	TRINITY_DN15762_c0_g2_i2.path1	TRINITY_DN71899_c0_g1_i2.path1	TRINITY_DN54033_c0_g2_i2.path2
TRINITY_DN306_c0_g1_i5.path1	TRINITY_DN30783_c0_g1_i6.path1	TRINITY_DN42989_c1_g1_i1.path1	TRINITY_DN16511_c0_g1_i6.path1	TRINITY_DN53070_c0_g1_i1.path1
novel.6651	Pepsico2_Contig337.path1	TRINITY_DN43845_c0_g1_i13.path1	Pepsico2_Contig18183.path1	TRINITY_DN12703_c0_g2_i1.path1
TRINITY_DN6808_c0_g3_i1.path2	TRINITY_DN20418_c0_g1_i1.path1	TRINITY_DN35718_c0_g3_i2.path1	TRINITY_DN42370_c0_g1_i1.path1	novel.175
novel.3659	novel.474	novel.1365	TRINITY_DN13881_c0_g2_i8.path2	novel.2049
TRINITY_DN19259_c1_g1_i1.path1	Pepsico1_Contig5607.path1	novel.1205	TRINITY_DN65545_c0_g1_i1.path1	TRINITY_DN11608_c2_g1_i1.path1
TRINITY_DN8605_c0_g1_i8.path1	novel.6523	novel.6058	novel.4835	TRINITY_DN77068_c0_g1_i1.path2
Pepsico2_Contig15984.path2	novel.1189	TRINITY_DN11147_c0_g2_i1.path1	TRINITY_DN11525_c0_g1_i21.path1	TRINITY_DN30055_c0_g1_i1.path1
novel.7735	Pepsico1_Contig556.path1	novel.3694	TRINITY_DN17687_c0_g2_i2.path1	TRINITY_DN99345_c0_g1_i1.path1
Pepsico2_Contig11409.path1	TRINITY_DN21357_c0_g1_i1.path1	TRINITY_DN7275_c0_g2_i2.path1	novel.7289	TRINITY_DN18897_c2_g1_i1.path1
Pepsico2_Contig13209.path1	novel.2957	novel.6134	Pepsico2_Contig8166.path1	TRINITY_DN24412_c0_g1_i5.path1
novel.675	TRINITY_DN26562_c0_g1_i1.path1	TRINITY_DN62350_c0_g1_i1.path1	Pepsico2_Contig21012.path1	novel.6157
Pepsico1_Contig2324.path2	TRINITY_DN7475_c0_g2_i1.path1	Pepsico1_Contig36152.path1	novel.787	TRINITY_DN109491_c0_g1_i1.path1
TRINITY_DN19684_c1_g1_i1.path1	TRINITY_DN36669_c0_g1_i1.path1	TRINITY_DN98696_c0_g1_i1.path1	TRINITY_DN2551_c0_g2_i2.path2	novel.7840
TRINITY_DN13816_c0_g2_i1.path1	TRINITY_DN25430_c0_g1_i2.path2	TRINITY_DN30361_c0_g1_i2.path1	novel.6523	Pepsico2_Contig11910.path1
Pepsico1_Contig2275.path1	TRINITY_DN46537_c0_g1_i2.path1	Pepsico2_Contig17130.path1	TRINITY_DN31623_c0_g1_i1.path1	novel.4051
TRINITY_DN9335_c0_g1_i7.path2	novel.1781	TRINITY_DN2294_c24_g1_i1.path4	novel.6651	TRINITY_DN32584_c0_g1_i1.path1
novel.7062	TRINITY_DN8849_c1_g1_i7.path1	TRINITY_DN109687_c0_g1_i1.path1	novel.1103	Pepsico2_Contig8286.path1
TRINITY_DN75642_c0_g1_i1.path1	TRINITY_DN8756_c10_g1_i1.path1	TRINITY_DN31249_c1_g3_i1.path1	Pepsico2_Contig2312.path1	Pepsico2_Contig2154.path1
TRINITY_DN89062_c0_g1_i1.path1	Pepsico2_Contig14825.path1	TRINITY_DN10595_c0_g2_i2.path2	Pepsico2_Contig6417.path1	novel.1758
novel.3834	TRINITY_DN15645_c1_g1_i8.path1	TRINITY_DN15449_c0_g1_i1.path1	TRINITY_DN12767_c0_g1_i2.path1	novel.6131
TRINITY_DN7412_c0_g1_i1.path1	novel.6441	TRINITY_DN18409_c0_g3_i1.path1	novel.7210	TRINITY_DN19350_c0_g1_i2.path1
TRINITY_DN1911_c0_g1_i10.path1	Pepsico2_Contig7545.path2	TRINITY_DN8973_c0_g2_i2.path1	TRINITY_DN6808_c0_g3_i1.path2	novel.9083
Pepsico2_Contig2197.path1	TRINITY_DN25280_c2_g1_i1.path1	novel.9409	novel.4444	novel.4160
TRINITY_DN61083_c0_g2_i1.path1	TRINITY_DN7242_c0_g1_i2.path1	TRINITY_DN80213_c0_g1_i1.path1	TRINITY_DN79688_c0_g1_i1.path1	novel.3393
TRINITY_DN9608_c0_g2_i2.path2	TRINITY_DN60222_c0_g1_i2.path1	Pepsico1_Contig1213.path1	TRINITY_DN92905_c0_g1_i1.path2	TRINITY_DN12408_c4_g1_i1.path1
novel.5012	novel.9015	TRINITY_DN7319_c0_g3_i1.path2	TRINITY_DN24406_c0_g1_i1.path1	novel.8064
TRINITY_DN10559_c0_g1_i12.path1	TRINITY_DN28234_c0_g2_i1.path2	TRINITY_DN14410_c0_g1_i1.path1	novel.566	TRINITY_DN86956_c0_g1_i1.path1
TRINITY_DN57413_c0_g2_i1.path1	Pepsico2_Contig3005.path1	TRINITY_DN108805_c0_g1_i1.path1	TRINITY_DN36562_c0_g1_i1.path2	TRINITY_DN32929_c0_g1_i1.path1
novel.2005	TRINITY_DN4288_c0_g1_i3.path1	TRINITY_DN19933_c1_g5_i1.path1	Pepsico1_Contig1334.path1	TRINITY_DN7066_c0_g1_i2.path1
Pepsico2_Contig11484.path2	TRINITY_DN32457_c0_g1_i1.path2	Pepsico1_Contig3132.path4	Pepsico2_Contig6644.path1	Pepsico2_Contig11466.path1
novel.8299	novel.4882	TRINITY_DN24832_c0_g3_i1.path1	novel.1820	TRINITY_DN23219_c0_g5_i1.path1
TRINITY_DN18442_c1_g1_i2.path2	TRINITY_DN11429_c1_g1_i3.path1	TRINITY_DN35_c0_g2_i1.path1	novel.4460	TRINITY_DN9734_c0_g2_i1.path1
TRINITY_DN12045_c0_g1_i2.path1	TRINITY_DN23584_c0_g1_i4.path2	TRINITY_DN11880_c0_g1_i1.path3	novel.3694	TRINITY_DN21860_c1_g1_i1.path1
TRINITY_DN23431_c0_g1_i2.path1	TRINITY_DN22779_c0_g1_i1.path1	TRINITY_DN22767_c0_g1_i1.path4	novel.5393	novel.3009
Pepsico2_Contig8093.path2	TRINITY_DN10905_c0_g1_i6.path2	novel.4774	TRINITY_DN9335_c0_g1_i7.path2	TRINITY_DN15198_c0_g3_i1.path1
TRINITY_DN9519_c0_g1_i4.path1	TRINITY_DN50909_c0_g1_i1.path1	TRINITY_DN12913_c0_g3_i1.path1	novel.4778	novel.5855
TRINITY_DN9250_c0_g2_i2.path2	novel.1221	TRINITY_DN19404_c0_g1_i1.path1	novel.4793	Pepsico1_Contig1451.path1
TRINITY_DN36607_c0_g1_i1.path1	novel.8805	TRINITY_DN9975_c0_g2_i5.path1	Pepsico2_Contig16961.path1	novel.6517
Pepsico2_Contig17225.path2	novel.2964	Pepsico2_Contig14627.path1	TRINITY_DN25751_c0_g1_i2.path1	TRINITY_DN37171_c0_g1_i1.path1
TRINITY_DN13905_c0_g1_i1.path2	novel.9665	novel.1667	TRINITY_DN29201_c0_g1_i5.path1	TRINITY_DN11234_c0_g1_i2.path1
TRINITY_DN15612_c0_g1_i10.path3	TRINITY_DN32251_c0_g1_i1.path1	TRINITY_DN83410_c0_g1_i1.path1	novel.1731	Pepsico2_Contig10698.path1
novel.3183	TRINITY_DN86160_c0_g1_i1.path1	TRINITY_DN14375_c0_g1_i3.path1	TRINITY_DN40261_c0_g1_i1.path1	novel.6191
TRINITY_DN98417_c0_g1_i1.path1	novel.2988	novel.3196	TRINITY_DN22833_c0_g3_i3.path1	TRINITY_DN18924_c0_g1_i1.path1
novel.8875	novel.8808	novel.1517	TRINITY_DN20994_c0_g1_i1.path2	TRINITY_DN16393_c0_g1_i1.path1
TRINITY_DN8916_c1_g3_i1.path1	TRINITY_DN7934_c2_g5_i1.path2	TRINITY_DN99651_c0_g1_i1.path2	TRINITY_DN26672_c1_g2_i2.path1	novel.197
TRINITY_DN22358_c0_g1_i2.path1	Pepsico2_Contig16099.path1	TRINITY_DN14481_c1_g2_i1.path1	TRINITY_DN4027_c2_g1_i1.path1	TRINITY_DN6578_c0_g1_i14.path3
TRINITY_DN41659_c0_g1_i1.path2	TRINITY_DN49704_c0_g1_i1.path1	TRINITY_DN64431_c0_g1_i3.path1	Pepsico2_Contig2961.path1	novel.5950
TRINITY_DN22426_c0_g1_i1.path1	novel.7424	novel.6523	TRINITY_DN19565_c0_g1_i3.path1	TRINITY_DN15969_c0_g1_i3.path1
TRINITY_DN12571_c0_g1_i13.path1	TRINITY_DN10718_c0_g4_i1.path1	TRINITY_DN32157_c1_g1_i2.path1	novel.979	TRINITY_DN103489_c0_g1_i1.path1
TRINITY_DN15735_c0_g4_i1.path1	novel.5277	TRINITY_DN18688_c0_g3_i2.path1	novel.6340	TRINITY_DN39169_c0_g1_i1.path1
novel.4018	TRINITY_DN27835_c0_g1_i1.path2	novel.2092	Pepsico1_Contig31861.path1	TRINITY_DN2091_c0_g2_i1.path2
novel.8146	novel.1260	TRINITY_DN23219_c0_g3_i3.path1	TRINITY_DN32743_c0_g1_i1.path2	TRINITY_DN7824_c0_g1_i1.path2
novel.9016	TRINITY_DN37160_c0_g1_i1.path1	Pepsico1_Contig36309.path1	TRINITY_DN30446_c0_g1_i1.path2	TRINITY_DN114213_c0_g1_i1.path1
novel.3187	TRINITY_DN75397_c0_g1_i1.path1	TRINITY_DN7934_c2_g5_i1.path1	TRINITY_DN102781_c0_g1_i1.path1	Pepsico2_Contig11832.path1
Pepsico2_Contig8195.path2	novel.8141	TRINITY_DN16237_c0_g1_i1.path1	TRINITY_DN34147_c0_g1_i7.path1	TRINITY_DN23219_c0_g3_i3.path1
novel.10201	TRINITY_DN11478_c0_g1_i4.path2	novel.9920	novel.2142	TRINITY_DN50116_c0_g2_i1.path1
novel.9021	TRINITY_DN22833_c0_g3_i3.path1	novel.215	novel.9130	novel.1855
Pepsico2_Contig11667.path1	Pepsico1_Contig1213.path1	TRINITY_DN13542_c0_g1_i1.path2	TRINITY_DN64431_c0_g1_i3.path1	TRINITY_DN30892_c0_g1_i1.path1
Pepsico1_Contig1404.path1	TRINITY_DN4532_c0_g1_i4.path2	TRINITY_DN17319_c0_g1_i7.path1	TRINITY_DN9975_c0_g2_i5.path1	novel.10525
novel.3981	Pepsico1_Contig36346.path1	novel.10624	TRINITY_DN106731_c0_g1_i1.path1	novel.375
novel.6167	TRINITY_DN19933_c1_g5_i1.path1	TRINITY_DN52779_c0_g1_i1.path1	TRINITY_DN12758_c1_g2_i1.path1	TRINITY_DN11880_c0_g1_i1.path3
TRINITY_DN41167_c0_g1_i3.path1	Pepsico2_Contig12504.path1	TRINITY_DN32251_c0_g1_i1.path1	novel.474	TRINITY_DN80419_c0_g1_i1.path1
novel.8661	TRINITY_DN78750_c0_g1_i1.path1	novel.9674	TRINITY_DN10288_c0_g1_i1.path2	TRINITY_DN15354_c1_g2_i1.path1
TRINITY_DN19696_c0_g1_i3.path1	TRINITY_DN27295_c0_g1_i1.path1	TRINITY_DN20418_c0_g1_i1.path1	TRINITY_DN15850_c0_g1_i2.path1	Pepsico2_Contig643.path2
Pepsico2_Contig5526.path1	novel.6391	TRINITY_DN79890_c0_g1_i1.path2	novel.8827	TRINITY_DN8315_c0_g1_i2.path2
TRINITY_DN13663_c1_g1_i1.path1	TRINITY_DN14549_c0_g2_i3.path1	TRINITY_DN44459_c0_g1_i1.path1	TRINITY_DN9776_c0_g1_i9.path2	Pepsico2_Contig8093.path2
TRINITY_DN27316_c0_g1_i2.path1	TRINITY_DN10288_c0_g1_i1.path2	TRINITY_DN4663_c1_g2_i1.path1	TRINITY_DN47408_c0_g1_i1.path2	Pepsico2_Contig6342.path2
novel.4882	TRINITY_DN24494_c0_g2_i1.path2	TRINITY_DN7897_c2_g1_i3.path1	novel.6151	Pepsico1_Contig22880.path1
novel.7147	Pepsico2_Contig20774.path2	TRINITY_DN4076_c0_g1_i5.path1	TRINITY_DN22518_c0_g1_i2.path1	novel.9245
TRINITY_DN18193_c0_g2_i1.path2	novel.8942	TRINITY_DN11877_c0_g2_i4.path1	novel.1719	TRINITY_DN29717_c0_g3_i1.path3
novel.6606	TRINITY_DN54476_c0_g1_i1.path1	novel.6079	TRINITY_DN11234_c0_g1_i2.path1	TRINITY_DN3394_c1_g2_i1.path1
TRINITY_DN20875_c0_g1_i1.path2	novel.7743	Pepsico2_Contig7656.path1	TRINITY_DN41641_c0_g1_i2.path1	TRINITY_DN16257_c1_g1_i5.path2
TRINITY_DN20500_c0_g3_i1.path1	TRINITY_DN2567_c0_g1_i1.path1	novel.3217	TRINITY_DN111692_c0_g1_i1.path1	TRINITY_DN39340_c0_g1_i2.path3
Pepsico1_Contig32360.path1	novel.348	TRINITY_DN9920_c0_g1_i11.path1	novel.3009	TRINITY_DN13905_c0_g1_i1.path2
TRINITY_DN23702_c0_g1_i2.path1	TRINITY_DN5536_c1_g1_i4.path2	TRINITY_DN19851_c0_g1_i1.path1	novel.4051	TRINITY_DN18940_c0_g2_i1.path1
Pepsico2_Contig5409.path1	TRINITY_DN88632_c0_g1_i1.path1	TRINITY_DN65319_c0_g1_i1.path1	novel.6659	TRINITY_DN85720_c0_g1_i1.path3
novel.1107	TRINITY_DN2755_c0_g2_i1.path2	TRINITY_DN8756_c10_g1_i1.path1	TRINITY_DN40642_c0_g1_i1.path3	Pepsico2_Contig17265.path1
TRINITY_DN43808_c0_g4_i1.path1	TRINITY_DN12178_c0_g1_i2.path1	TRINITY_DN26562_c0_g2_i1.path1	TRINITY_DN32267_c0_g1_i1.path1	TRINITY_DN101486_c0_g1_i1.path2
TRINITY_DN4720_c0_g2_i2.path1	TRINITY_DN5970_c0_g2_i1.path2	novel.7904	novel.3682	TRINITY_DN8008_c0_g2_i1.path1
TRINITY_DN25501_c0_g1_i1.path1	TRINITY_DN34261_c0_g1_i1.path1	TRINITY_DN32457_c0_g1_i1.path2	Pepsico2_Contig11910.path1	TRINITY_DN26672_c1_g2_i2.path1
TRINITY_DN11360_c0_g2_i1.path1	Pepsico2_Contig11466.path1	TRINITY_DN15885_c0_g1_i1.path1	TRINITY_DN23219_c0_g3_i3.path1	TRINITY_DN6115_c1_g1_i2.path2
TRINITY_DN33167_c0_g1_i2.path1	TRINITY_DN3106_c0_g2_i1.path1	TRINITY_DN88746_c0_g1_i1.path1	novel.8493	novel.8592
TRINITY_DN27406_c0_g1_i1.path2	TRINITY_DN14129_c0_g1_i5.path3	TRINITY_DN23832_c0_g1_i1.path1	TRINITY_DN64836_c0_g1_i1.path1	novel.9394
novel.6076	TRINITY_DN16570_c0_g1_i4.path1	Pepsico1_Contig982.path1	TRINITY_DN35103_c2_g1_i1.path1	TRINITY_DN25826_c0_g2_i1.path1
novel.1537	Pepsico2_Contig2735.path1	Pepsico2_Contig5798.path1	Pepsico1_Contig4396.path1	TRINITY_DN30477_c0_g1_i2.path1
TRINITY_DN22405_c0_g2_i1.path2	TRINITY_DN25217_c0_g1_i1.path1	TRINITY_DN13887_c0_g1_i1.path1	TRINITY_DN98034_c0_g1_i1.path2	novel.7474
TRINITY_DN14991_c1_g1_i1.path1	Pepsico2_Contig1223.path1	TRINITY_DN30446_c0_g1_i1.path2	TRINITY_DN18409_c0_g3_i1.path1	TRINITY_DN37342_c0_g1_i1.path3
Pepsico2_Contig5904.path1	Pepsico1_Contig865.path1	TRINITY_DN31787_c0_g1_i2.path1	TRINITY_DN24412_c0_g1_i5.path1	novel.10329
novel.4038	TRINITY_DN7072_c5_g1_i2.path1	novel.6076	novel.933	novel.2441
TRINITY_DN10890_c0_g2_i1.path1	TRINITY_DN22229_c0_g2_i1.path1	TRINITY_DN34009_c0_g1_i1.path1	novel.3939	TRINITY_DN26530_c1_g1_i1.path1
TRINITY_DN24412_c0_g1_i5.path1	TRINITY_DN43549_c0_g1_i1.path2	TRINITY_DN582_c2_g1_i6.path1	TRINITY_DN11877_c0_g2_i4.path1	Pepsico1_Contig36060.path1
TRINITY_DN47146_c0_g1_i1.path2	TRINITY_DN31614_c0_g1_i3.path1	TRINITY_DN9335_c0_g1_i7.path2	TRINITY_DN90969_c0_g1_i1.path1	TRINITY_DN18513_c0_g1_i1.path1
TRINITY_DN12471_c0_g1_i1.path2	TRINITY_DN20136_c1_g1_i1.path1	Pepsico2_Contig2408.path3	TRINITY_DN23876_c1_g1_i1.path1	novel.9369
Pepsico2_Contig16986.path2	TRINITY_DN11668_c0_g1_i19.path1	TRINITY_DN2755_c0_g2_i1.path1	TRINITY_DN29405_c0_g1_i1.path1	novel.8580
TRINITY_DN38190_c0_g1_i1.path2	TRINITY_DN25384_c0_g2_i1.path1	novel.8714	TRINITY_DN34261_c0_g1_i1.path1	Pepsico1_Contig30037.path1
novel.4169	TRINITY_DN22584_c0_g2_i1.path1	novel.7425	TRINITY_DN5337_c0_g1_i4.path1	TRINITY_DN15648_c0_g1_i4.path1
TRINITY_DN23584_c0_g1_i4.path2	Pepsico2_Contig1491.path1	novel.4464	novel.3004	TRINITY_DN9335_c0_g1_i7.path1
novel.6339	novel.5947	Pepsico1_Contig5522.path4	TRINITY_DN11406_c0_g1_i1.path2	novel.3585
TRINITY_DN19565_c0_g1_i3.path1	TRINITY_DN5730_c0_g2_i2.path1	Pepsico2_Contig20459.path2	TRINITY_DN83410_c0_g1_i1.path1	TRINITY_DN22565_c0_g2_i2.path1
TRINITY_DN12806_c0_g1_i1.path1	TRINITY_DN24406_c0_g1_i1.path1	TRINITY_DN19110_c0_g3_i1.path1	TRINITY_DN87787_c0_g1_i1.path1	Pepsico2_Contig2036.path2
TRINITY_DN21086_c0_g1_i1.path1	TRINITY_DN10860_c0_g1_i2.path1	TRINITY_DN15850_c0_g1_i2.path1	novel.7076	TRINITY_DN588_c0_g2_i1.path1
TRINITY_DN46469_c0_g1_i1.path1	TRINITY_DN74032_c0_g1_i1.path2	TRINITY_DN6877_c0_g1_i1.path1	Pepsico1_Contig2398.path2	novel.8466
Pepsico2_Contig18037.path1	TRINITY_DN16760_c0_g1_i1.path1	novel.1226	Pepsico2_Contig13814.path1	TRINITY_DN8978_c0_g1_i11.path1
novel.360	novel.10494	TRINITY_DN55971_c0_g1_i1.path1	TRINITY_DN7934_c2_g1_i7.path1	TRINITY_DN16993_c1_g2_i2.path2
Pepsico1_Contig1451.path1	TRINITY_DN11877_c0_g2_i4.path1	TRINITY_DN53169_c0_g1_i1.path1	TRINITY_DN87460_c0_g1_i1.path1	novel.7658
TRINITY_DN16701_c0_g1_i2.path1	Pepsico2_Contig779.path1	novel.7703	novel.386	TRINITY_DN5931_c0_g1_i7.path1
novel.7515	TRINITY_DN12808_c0_g1_i3.path1	TRINITY_DN20627_c0_g1_i1.path1	TRINITY_DN112088_c0_g1_i1.path1	TRINITY_DN37834_c0_g4_i1.path1
TRINITY_DN26581_c0_g1_i1.path1	novel.1363	TRINITY_DN10241_c0_g2_i1.path1	novel.1106	novel.6441
novel.3228	novel.7294	novel.8141	novel.9836	TRINITY_DN7064_c1_g1_i4.path1
novel.1101	TRINITY_DN80029_c0_g1_i1.path1	novel.6167	Pepsico1_Contig16088.path2	novel.2689
TRINITY_DN24786_c0_g1_i1.path2	TRINITY_DN103453_c0_g1_i1.path1	TRINITY_DN37891_c0_g3_i1.path1	TRINITY_DN44543_c0_g1_i1.path2	TRINITY_DN79890_c0_g1_i1.path2
TRINITY_DN7205_c0_g1_i1.path3	novel.10603	TRINITY_DN38179_c0_g1_i1.path1	TRINITY_DN16570_c0_g1_i4.path1	TRINITY_DN51823_c0_g1_i1.path1
TRINITY_DN105250_c0_g1_i1.path1	novel.6058	TRINITY_DN19565_c0_g1_i3.path1	TRINITY_DN37891_c0_g3_i1.path1	Pepsico2_Contig21149.path1
novel.4542	TRINITY_DN24796_c1_g2_i1.path3	TRINITY_DN8978_c0_g1_i11.path1	novel.7474	TRINITY_DN32743_c0_g1_i1.path2
TRINITY_DN63358_c1_g1_i1.path1	novel.7206	TRINITY_DN1201_c2_g1_i2.path1	TRINITY_DN16277_c0_g1_i4.path1	TRINITY_DN30783_c0_g1_i6.path1
TRINITY_DN3591_c0_g1_i2.path1	TRINITY_DN14475_c0_g2_i3.path1	TRINITY_DN5337_c0_g1_i4.path1	TRINITY_DN13542_c0_g1_i1.path2	novel.1538
TRINITY_DN18237_c1_g3_i1.path1	TRINITY_DN8973_c0_g2_i2.path1	novel.1537	TRINITY_DN49442_c0_g1_i1.path1	TRINITY_DN11234_c0_g3_i1.path1
novel.3394	TRINITY_DN4538_c0_g1_i3.path2	novel.5824	novel.4188	novel.5885
Pepsico2_Contig4411.path1	TRINITY_DN10559_c0_g1_i12.path1	TRINITY_DN19029_c0_g1_i1.path1	TRINITY_DN39189_c1_g1_i3.path1	TRINITY_DN8670_c1_g1_i8.path2
TRINITY_DN1397_c0_g3_i1.path1	novel.8176	TRINITY_DN50909_c0_g1_i1.path1	novel.3186	Pepsico2_Contig9474.path1
TRINITY_DN111866_c0_g1_i1.path1	novel.2863	novel.6391	novel.8909	TRINITY_DN29528_c0_g1_i1.path1
novel.9385	TRINITY_DN41708_c0_g2_i6.path1	novel.1445	Pepsico2_Contig474.path1	TRINITY_DN34195_c0_g1_i2.path1
TRINITY_DN9943_c1_g1_i1.path1	novel.1766	Pepsico2_Contig3417.path2	Pepsico1_Contig30037.path1	TRINITY_DN87787_c0_g1_i1.path1
TRINITY_DN44824_c0_g1_i1.path4	TRINITY_DN86093_c0_g1_i1.path1	novel.3513	novel.3196	Pepsico1_Contig24342.path2
novel.7697	TRINITY_DN18237_c1_g3_i1.path1	Pepsico2_Contig12326.path2	novel.83	TRINITY_DN16231_c0_g1_i2.path2
novel.5924	Pepsico1_Contig4661.path1	TRINITY_DN11773_c0_g2_i1.path3	TRINITY_DN18513_c0_g1_i1.path1	novel.12
TRINITY_DN33640_c0_g3_i1.path1	novel.9354	TRINITY_DN16062_c0_g1_i1.path1	TRINITY_DN91942_c0_g1_i1.path1	TRINITY_DN10324_c0_g1_i2.path1
TRINITY_DN13797_c1_g1_i1.path1	novel.7368	TRINITY_DN24307_c0_g1_i1.path1	novel.6391	TRINITY_DN30795_c0_g1_i1.path1
Pepsico2_Contig5308.path1	novel.5850	TRINITY_DN18161_c0_g1_i10.path1	Pepsico2_Contig17102.path1	TRINITY_DN18193_c0_g2_i1.path2
novel.1750	Pepsico1_Contig638.path1	TRINITY_DN15712_c0_g1_i2.path1	novel.1627	TRINITY_DN17687_c0_g2_i2.path1
TRINITY_DN26038_c0_g6_i1.path1	TRINITY_DN12475_c1_g2_i5.path2	TRINITY_DN30929_c0_g1_i2.path1	Pepsico1_Contig36309.path1	TRINITY_DN22453_c1_g3_i1.path2
novel.3201	TRINITY_DN23955_c0_g1_i1.path1	TRINITY_DN22779_c0_g1_i1.path1	TRINITY_DN13887_c0_g1_i1.path1	TRINITY_DN3601_c0_g1_i1.path2
Pepsico2_Contig11017.path1	TRINITY_DN11731_c0_g3_i1.path1	Pepsico1_Contig6443.path2	novel.3414	TRINITY_DN27316_c0_g1_i2.path1
novel.4509	novel.215	TRINITY_DN65604_c0_g1_i1.path1	TRINITY_DN21473_c0_g1_i1.path1	TRINITY_DN38876_c3_g1_i1.path1
TRINITY_DN31143_c0_g1_i14.path1	TRINITY_DN11349_c0_g1_i2.path2	novel.6222	TRINITY_DN105250_c0_g1_i1.path3	TRINITY_DN66520_c0_g1_i1.path1
TRINITY_DN9608_c0_g1_i4.path2	novel.1224	TRINITY_DN15735_c0_g4_i1.path1	Pepsico1_Contig7066.path2	Pepsico2_Contig13308.path1
TRINITY_DN65812_c0_g1_i1.path2	TRINITY_DN8925_c0_g1_i1.path1	TRINITY_DN59745_c0_g1_i1.path1	Pepsico1_Contig27781.path2	TRINITY_DN10241_c0_g2_i1.path1
TRINITY_DN8978_c0_g1_i11.path1	novel.1205	Pepsico2_Contig16832.path1	Pepsico2_Contig19712.path2	novel.1390
novel.4528	TRINITY_DN53024_c0_g1_i1.path2	novel.10246	TRINITY_DN6829_c1_g1_i1.path1	novel.9599
TRINITY_DN9509_c0_g1_i4.path2	TRINITY_DN34009_c0_g1_i1.path1	novel.918	novel.4550	TRINITY_DN23034_c0_g1_i1.path1
novel.2921	Pepsico2_Contig8540.path2	novel.181	Pepsico2_Contig15875.path2	TRINITY_DN4640_c1_g2_i1.path2
TRINITY_DN52538_c0_g1_i1.path1	Pepsico2_Contig8093.path2	novel.6039	TRINITY_DN6563_c0_g1_i19.path2	TRINITY_DN19482_c0_g2_i1.path1
TRINITY_DN9971_c0_g1_i1.path1	novel.9786	Pepsico2_Contig7984.path2	Pepsico1_Contig6443.path2	TRINITY_DN29405_c0_g1_i1.path1
TRINITY_DN27067_c1_g1_i1.path1	novel.8204	novel.7823	TRINITY_DN26449_c0_g1_i1.path2	Pepsico1_Contig4382.path1
TRINITY_DN1229_c0_g2_i1.path2	novel.2946	TRINITY_DN14132_c0_g2_i2.path1	TRINITY_DN15123_c0_g1_i4.path1	TRINITY_DN9693_c0_g1_i7.path1
TRINITY_DN10990_c0_g2_i1.path2	TRINITY_DN10416_c0_g5_i1.path3	TRINITY_DN19684_c0_g1_i6.path1	TRINITY_DN12677_c0_g1_i1.path1	novel.3808
TRINITY_DN12397_c0_g2_i1.path2	TRINITY_DN38367_c0_g1_i1.path1	TRINITY_DN65545_c0_g1_i1.path1	novel.8200	novel.1477
novel.3947	novel.7345	TRINITY_DN9653_c1_g2_i1.path1	novel.10561	TRINITY_DN107989_c0_g1_i1.path1
TRINITY_DN58518_c0_g2_i1.path1	TRINITY_DN23337_c0_g1_i1.path1	TRINITY_DN85435_c0_g1_i1.path1	TRINITY_DN87722_c0_g1_i1.path3	novel.2898
TRINITY_DN10668_c0_g1_i5.path1	novel.7904	TRINITY_DN18468_c0_g1_i6.path1	TRINITY_DN65319_c0_g1_i1.path1	Pepsico2_Contig5262.path2
TRINITY_DN1258_c0_g9_i1.path1	novel.3180	novel.8253	novel.2960	TRINITY_DN24307_c0_g1_i1.path1
TRINITY_DN17687_c0_g2_i2.path1	novel.3201	TRINITY_DN2720_c0_g1_i2.path1	Pepsico1_Contig1025.path1	TRINITY_DN65812_c0_g1_i1.path2
Pepsico2_Contig11017.path2	novel.9736	TRINITY_DN24524_c0_g1_i2.path1	TRINITY_DN8916_c0_g2_i1.path1	TRINITY_DN49160_c0_g3_i1.path2
novel.7107	novel.6932	TRINITY_DN56945_c0_g1_i1.path1	Pepsico2_Contig19271.path1	Pepsico1_Contig2723.path1
TRINITY_DN52817_c0_g1_i1.path1	TRINITY_DN13853_c0_g1_i1.path2	novel.6651	TRINITY_DN15282_c0_g1_i1.path1	TRINITY_DN50492_c0_g2_i1.path2
TRINITY_DN8473_c0_g2_i2.path1	TRINITY_DN20282_c0_g1_i3.path1	novel.8730	novel.9605	novel.2984
TRINITY_DN1195_c0_g5_i1.path2	TRINITY_DN5821_c0_g1_i8.path2	TRINITY_DN16570_c0_g1_i4.path1	TRINITY_DN7275_c0_g2_i2.path1	TRINITY_DN383_c1_g2_i1.path1
TRINITY_DN11511_c0_g1_i2.path1	TRINITY_DN26078_c0_g1_i1.path1	TRINITY_DN23496_c0_g1_i2.path2	TRINITY_DN18924_c0_g1_i1.path1	TRINITY_DN25978_c0_g3_i1.path2
TRINITY_DN10654_c0_g3_i2.path1	novel.6076	TRINITY_DN15455_c0_g1_i7.path3	novel.7725	novel.8619
novel.7304	Pepsico2_Contig16933.path2	TRINITY_DN49782_c0_g1_i1.path1	TRINITY_DN40225_c0_g1_i1.path2	TRINITY_DN35103_c2_g1_i1.path1
TRINITY_DN8096_c0_g1_i4.path1	novel.4846	novel.8810	TRINITY_DN31490_c0_g2_i1.path1	TRINITY_DN16062_c0_g1_i1.path1
TRINITY_DN7275_c0_g2_i2.path1	Pepsico2_Contig17067.path1	TRINITY_DN7475_c1_g1_i1.path3	Pepsico2_Contig2570.path3	TRINITY_DN12748_c0_g1_i2.path1
TRINITY_DN10241_c0_g2_i1.path1	novel.6729	novel.5372	TRINITY_DN20324_c0_g1_i1.path1	TRINITY_DN8471_c0_g3_i1.path1
TRINITY_DN40781_c0_g1_i1.path1	TRINITY_DN9148_c0_g1_i1.path2	Pepsico2_Contig9973.path1	TRINITY_DN1122_c0_g4_i2.path2	TRINITY_DN98076_c0_g1_i1.path1
novel.1770	novel.1959	novel.224	Pepsico2_Contig13090.path1	TRINITY_DN14036_c1_g1_i3.path2
novel.8253	TRINITY_DN87_c0_g1_i1.path2	TRINITY_DN55875_c0_g1_i2.path1	novel.6199	Pepsico1_Contig31535.path2
TRINITY_DN5794_c0_g2_i5.path1	TRINITY_DN18237_c1_g1_i2.path1	Pepsico2_Contig9000.path1	novel.9618	TRINITY_DN21624_c0_g1_i1.path1
TRINITY_DN23463_c1_g1_i1.path1	TRINITY_DN13217_c0_g1_i1.path3	TRINITY_DN12808_c0_g1_i3.path1	TRINITY_DN24832_c0_g3_i1.path1	TRINITY_DN37359_c0_g1_i1.path3
Pepsico2_Contig15984.path1	Pepsico2_Contig13099.path1	novel.4459	novel.5958	TRINITY_DN21900_c0_g1_i2.path1
TRINITY_DN56186_c0_g1_i1.path1	TRINITY_DN21352_c0_g2_i1.path1	TRINITY_DN27300_c0_g1_i1.path1	novel.1343	novel.7099
novel.4519	TRINITY_DN1580_c0_g1_i4.path1	novel.4513	novel.7462	TRINITY_DN15735_c0_g4_i1.path1
Pepsico2_Contig3417.path2	TRINITY_DN4944_c0_g2_i1.path1	novel.8299	TRINITY_DN16295_c0_g1_i1.path2	TRINITY_DN14240_c0_g1_i1.path2
novel.10234	novel.1390	TRINITY_DN89062_c0_g1_i1.path1	TRINITY_DN16507_c0_g1_i2.path1	novel.5849
TRINITY_DN63001_c0_g1_i1.path1	novel.8299	novel.4048	TRINITY_DN23201_c0_g1_i2.path1	TRINITY_DN30123_c0_g1_i1.path1
TRINITY_DN108749_c0_g1_i1.path1	Pepsico2_Contig9071.path1	TRINITY_DN3429_c1_g1_i2.path1	TRINITY_DN23067_c0_g1_i1.path1	novel.2652
TRINITY_DN15838_c0_g1_i1.path1	TRINITY_DN9637_c0_g1_i4.path1	novel.6234	TRINITY_DN37160_c0_g1_i1.path1	novel.7553
TRINITY_DN32537_c0_g1_i2.path2	Pepsico2_Contig3356.path1	novel.7962	TRINITY_DN5707_c0_g1_i2.path2	TRINITY_DN9373_c0_g1_i6.path1
novel.3908	TRINITY_DN31490_c0_g2_i1.path1	novel.7175	TRINITY_DN10718_c0_g4_i1.path1	novel.7725
TRINITY_DN40665_c0_g2_i1.path1	novel.6323	TRINITY_DN32319_c0_g1_i1.path1	novel.4464	TRINITY_DN27671_c0_g1_i2.path1
TRINITY_DN23596_c0_g1_i3.path1	TRINITY_DN21074_c0_g1_i1.path1	novel.360	TRINITY_DN73578_c0_g1_i1.path1	TRINITY_DN23067_c0_g1_i1.path1
TRINITY_DN14375_c0_g1_i3.path1	TRINITY_DN31249_c1_g3_i1.path1	novel.9354	TRINITY_DN25489_c0_g1_i1.path1	novel.8746
TRINITY_DN7687_c0_g1_i2.path2	novel.1892	novel.267	novel.5598	TRINITY_DN11357_c0_g1_i1.path1
Pepsico2_Contig20617.path1	Pepsico2_Contig4899.path1	TRINITY_DN4944_c0_g2_i1.path1	Pepsico2_Contig19863.path2	TRINITY_DN17980_c0_g1_i4.path1
novel.5156	novel.2183	TRINITY_DN13899_c0_g1_i7.path1	novel.1390	TRINITY_DN12913_c0_g2_i1.path1
novel.9786	novel.8730	TRINITY_DN34147_c0_g1_i7.path1	TRINITY_DN83442_c0_g1_i1.path1	novel.6182
TRINITY_DN30929_c0_g1_i2.path1	Pepsico2_Contig752.path1	Pepsico2_Contig8853.path1	Pepsico2_Contig20820.path2	novel.5480
novel.9698	TRINITY_DN37782_c0_g2_i1.path1	TRINITY_DN18442_c1_g1_i2.path2	Pepsico1_Contig4382.path1	Pepsico2_Contig19478.path1
TRINITY_DN14220_c0_g2_i6.path1	TRINITY_DN38763_c0_g1_i1.path1	Pepsico2_Contig4421.path1	TRINITY_DN30931_c0_g2_i1.path1	TRINITY_DN21432_c0_g2_i1.path1
novel.7779	TRINITY_DN52679_c0_g1_i1.path2	TRINITY_DN29201_c0_g1_i5.path1	novel.1110	novel.1517
TRINITY_DN10664_c1_g6_i1.path2	TRINITY_DN113859_c0_g1_i1.path2	TRINITY_DN38217_c0_g1_i1.path1	TRINITY_DN23336_c0_g2_i1.path1	TRINITY_DN276_c1_g1_i1.path1
TRINITY_DN1968_c0_g1_i4.path2	TRINITY_DN24254_c0_g1_i2.path1	TRINITY_DN53146_c0_g1_i2.path1	TRINITY_DN109518_c0_g1_i1.path3	TRINITY_DN18098_c0_g1_i1.path2
Pepsico2_Contig7738.path2	novel.426	TRINITY_DN14383_c0_g2_i2.path1	TRINITY_DN107989_c0_g1_i1.path1	TRINITY_DN16237_c0_g5_i1.path2
Pepsico2_Contig16525.path1	novel.67	TRINITY_DN2554_c0_g1_i11.path2	Pepsico2_Contig12859.path1	TRINITY_DN10891_c1_g1_i1.path1
novel.5525	TRINITY_DN105250_c0_g1_i1.path1	TRINITY_DN56381_c0_g1_i1.path1	TRINITY_DN10382_c0_g1_i3.path2	TRINITY_DN17834_c0_g1_i1.path1
novel.4775	TRINITY_DN13887_c0_g1_i1.path1	Pepsico2_Contig779.path1	TRINITY_DN27607_c0_g1_i10.path1	TRINITY_DN11877_c0_g2_i4.path1
TRINITY_DN111834_c0_g1_i1.path1	Pepsico1_Contig29617.path1	TRINITY_DN9778_c0_g2_i1.path1	TRINITY_DN32113_c0_g1_i1.path1	TRINITY_DN40112_c0_g1_i1.path1
novel.972	novel.2742	novel.6350	TRINITY_DN20962_c0_g1_i1.path2	novel.4705
TRINITY_DN86093_c0_g1_i1.path1	novel.5209	TRINITY_DN8095_c0_g1_i3.path1	Pepsico2_Contig11832.path1	novel.8663
TRINITY_DN21332_c0_g2_i2.path2	Pepsico2_Contig5514.path1	novel.35	novel.2342	Pepsico1_Contig1632.path2
TRINITY_DN11877_c0_g2_i4.path1	novel.5248	novel.8899	TRINITY_DN30070_c0_g1_i1.path5	TRINITY_DN12927_c0_g2_i1.path1
novel.7771	TRINITY_DN16918_c0_g1_i7.path2	TRINITY_DN25639_c0_g1_i1.path1	TRINITY_DN80213_c0_g1_i1.path1	novel.3180
novel.5200	TRINITY_DN21086_c0_g1_i1.path1	TRINITY_DN103622_c0_g1_i1.path1	Pepsico1_Contig3350.path2	novel.9053
novel.5980	novel.3513	novel.8936	Pepsico1_Contig27244.path1	TRINITY_DN431_c0_g1_i7.path1
novel.3218	Pepsico2_Contig11020.path2	TRINITY_DN1258_c0_g9_i1.path1	novel.6164	novel.10542
TRINITY_DN24796_c1_g2_i1.path3	novel.267	novel.5032	TRINITY_DN106656_c0_g1_i1.path1	TRINITY_DN40642_c0_g1_i1.path3
novel.1917	TRINITY_DN56381_c0_g1_i1.path1	TRINITY_DN86160_c0_g1_i1.path1	novel.5310	TRINITY_DN42581_c0_g1_i1.path1
TRINITY_DN42370_c0_g1_i1.path1	Pepsico1_Contig1795.path1	TRINITY_DN7934_c2_g3_i1.path1	TRINITY_DN18193_c0_g2_i1.path2	TRINITY_DN4785_c0_g1_i7.path2
TRINITY_DN25378_c0_g1_i1.path1	TRINITY_DN11360_c0_g2_i1.path1	TRINITY_DN19135_c0_g1_i1.path1	novel.3639	TRINITY_DN91494_c0_g1_i1.path1
TRINITY_DN34544_c0_g1_i2.path1	novel.8146	TRINITY_DN4783_c0_g2_i1.path1	novel.3908	TRINITY_DN10382_c0_g1_i3.path2
TRINITY_DN30194_c0_g1_i5.path1	TRINITY_DN38440_c0_g1_i2.path1	novel.6246	TRINITY_DN19110_c0_g3_i1.path1	TRINITY_DN28700_c0_g4_i1.path1
TRINITY_DN8318_c0_g1_i3.path3	TRINITY_DN14330_c0_g1_i1.path1	TRINITY_DN15784_c0_g1_i6.path1	TRINITY_DN40949_c1_g1_i1.path2	novel.10207
TRINITY_DN11195_c1_g1_i1.path2	novel.35	TRINITY_DN85794_c0_g1_i1.path1	novel.8224	novel.5598
TRINITY_DN65545_c0_g1_i1.path1	TRINITY_DN9814_c1_g1_i2.path2	TRINITY_DN70835_c0_g1_i1.path1	novel.6828	novel.7158
TRINITY_DN15354_c1_g2_i1.path1	TRINITY_DN32267_c0_g1_i1.path1	TRINITY_DN34600_c0_g1_i1.path1	TRINITY_DN23584_c0_g1_i4.path2	TRINITY_DN49471_c0_g1_i1.path1
novel.9860	Pepsico2_Contig6624.path1	novel.8498	novel.4774	TRINITY_DN72273_c0_g1_i1.path1
TRINITY_DN12929_c1_g1_i1.path1	TRINITY_DN1229_c0_g2_i1.path2	TRINITY_DN99651_c0_g1_i1.path1	Pepsico1_Contig3025.path1	TRINITY_DN23337_c0_g1_i1.path2
TRINITY_DN4944_c0_g2_i1.path1	TRINITY_DN38216_c0_g1_i1.path1	TRINITY_DN22229_c0_g2_i1.path1	TRINITY_DN37797_c0_g2_i1.path1	TRINITY_DN37871_c0_g1_i1.path1
TRINITY_DN13333_c2_g1_i2.path1	TRINITY_DN14972_c0_g1_i3.path2	TRINITY_DN16357_c0_g2_i3.path1	Pepsico2_Contig19444.path1	TRINITY_DN22779_c0_g1_i1.path1
TRINITY_DN27458_c0_g1_i3.path1	novel.4541	novel.7303	TRINITY_DN75397_c0_g1_i1.path3	TRINITY_DN34931_c0_g2_i1.path1
TRINITY_DN10226_c0_g1_i1.path1	TRINITY_DN582_c1_g1_i4.path1	TRINITY_DN99345_c0_g1_i1.path2	TRINITY_DN16555_c0_g1_i2.path1	TRINITY_DN21706_c0_g2_i1.path1
Pepsico2_Contig17986.path1	TRINITY_DN3797_c0_g1_i2.path1	Pepsico2_Contig6836.path1	TRINITY_DN11729_c0_g2_i5.path1	Pepsico2_Contig15585.path1
TRINITY_DN9600_c0_g1_i1.path1	novel.4616	Pepsico2_Contig1676.path1	Pepsico2_Contig19795.path2	TRINITY_DN19239_c0_g1_i1.path1
TRINITY_DN19110_c0_g3_i1.path1	novel.8592	TRINITY_DN14427_c1_g1_i1.path1	TRINITY_DN61850_c0_g1_i1.path2	TRINITY_DN11360_c0_g1_i1.path1
TRINITY_DN29879_c0_g1_i4.path1	TRINITY_DN47146_c0_g1_i1.path2	TRINITY_DN20167_c1_g1_i1.path1	novel.8204	TRINITY_DN18634_c0_g1_i6.path1
TRINITY_DN82273_c0_g1_i1.path1	TRINITY_DN324_c0_g2_i1.path1	novel.6809	novel.6685	TRINITY_DN60223_c0_g1_i1.path1
Pepsico2_Contig5745.path1	TRINITY_DN51163_c0_g1_i1.path1	TRINITY_DN11075_c0_g1_i6.path1	Pepsico1_Contig6230.path1	novel.928
novel.6272	novel.63	Pepsico2_Contig16795.path2	TRINITY_DN4252_c0_g3_i1.path2	Pepsico2_Contig15299.path2
novel.9838	TRINITY_DN56964_c0_g1_i1.path1	novel.2988	TRINITY_DN24042_c0_g1_i2.path1	TRINITY_DN40685_c0_g1_i4.path1
TRINITY_DN14240_c0_g1_i1.path2	Pepsico2_Contig6161.path1	TRINITY_DN31332_c0_g1_i2.path1	novel.3595	Pepsico2_Contig9614.path2
TRINITY_DN20136_c1_g1_i1.path3	TRINITY_DN44751_c0_g1_i1.path1	TRINITY_DN25471_c0_g1_i4.path1	TRINITY_DN20131_c0_g1_i4.path1	novel.2605
TRINITY_DN24191_c0_g1_i2.path1	TRINITY_DN10595_c0_g2_i2.path2	TRINITY_DN7475_c0_g2_i1.path1	novel.1347	novel.3688
TRINITY_DN91_c0_g1_i1.path2	TRINITY_DN5109_c0_g1_i2.path1	TRINITY_DN25621_c0_g2_i1.path1	TRINITY_DN11360_c0_g2_i1.path1	TRINITY_DN3429_c1_g1_i2.path1
Pepsico2_Contig12764.path1	novel.5390	novel.4469	TRINITY_DN7897_c2_g1_i3.path1	novel.3186
TRINITY_DN8973_c0_g2_i2.path1	TRINITY_DN18442_c1_g1_i2.path2	novel.1793	Pepsico2_Contig14019.path1	TRINITY_DN4783_c0_g2_i1.path1
Pepsico2_Contig12859.path1	TRINITY_DN452_c0_g1_i2.path1	TRINITY_DN13333_c2_g1_i2.path1	TRINITY_DN12917_c0_g1_i1.path1	Pepsico1_Contig1188.path2
TRINITY_DN8471_c0_g3_i1.path1	TRINITY_DN10837_c0_g1_i1.path1	TRINITY_DN26343_c0_g2_i1.path2	TRINITY_DN11450_c3_g1_i1.path1	TRINITY_DN54463_c0_g1_i1.path1
TRINITY_DN29983_c0_g1_i2.path1	novel.5683	novel.2980	TRINITY_DN44824_c0_g1_i1.path3	TRINITY_DN68746_c0_g1_i1.path1
TRINITY_DN13938_c0_g1_i2.path1	novel.7703	Pepsico1_Contig6170.path1	TRINITY_DN89062_c0_g1_i1.path1	TRINITY_DN15697_c1_g1_i1.path5
TRINITY_DN57429_c0_g1_i1.path1	TRINITY_DN19259_c1_g1_i1.path1	TRINITY_DN40050_c0_g1_i1.path3	TRINITY_DN112171_c0_g1_i1.path1	TRINITY_DN102507_c0_g1_i1.path1
novel.8052	TRINITY_DN3429_c1_g1_i2.path1	TRINITY_DN923_c0_g3_i1.path1	TRINITY_DN26499_c0_g3_i2.path2	TRINITY_DN23876_c1_g1_i1.path1
Pepsico2_Contig2408.path3	Pepsico2_Contig1309.path1	novel.6515	novel.1855	TRINITY_DN37195_c1_g1_i1.path2
TRINITY_DN16062_c0_g1_i1.path1	TRINITY_DN1258_c0_g8_i1.path1	novel.474	TRINITY_DN6115_c1_g1_i2.path2	TRINITY_DN10981_c1_g1_i2.path1
TRINITY_DN13954_c0_g1_i1.path1	TRINITY_DN16237_c0_g1_i1.path1	novel.4566	novel.3043	novel.3218
TRINITY_DN24835_c0_g4_i1.path1	novel.8936	Pepsico2_Contig12859.path1	novel.5950	TRINITY_DN57903_c0_g1_i1.path1
TRINITY_DN78930_c0_g1_i1.path1	TRINITY_DN29283_c0_g1_i1.path2	TRINITY_DN91942_c0_g1_i1.path1	TRINITY_DN36030_c0_g1_i1.path1	TRINITY_DN8848_c0_g2_i1.path1
TRINITY_DN12193_c0_g2_i1.path1	novel.2500	novel.9387	TRINITY_DN60836_c0_g1_i1.path1	novel.7453
TRINITY_DN9056_c1_g1_i1.path1	novel.1513	novel.7047	TRINITY_DN34348_c0_g2_i1.path2	TRINITY_DN54876_c0_g1_i1.path1
novel.35	Pepsico2_Contig17563.path2	TRINITY_DN52148_c0_g1_i2.path1	TRINITY_DN31840_c0_g1_i1.path2	TRINITY_DN16113_c0_g1_i1.path1
Pepsico1_Contig36309.path1	novel.6965	TRINITY_DN40781_c0_g1_i1.path1	TRINITY_DN34348_c0_g2_i1.path1	TRINITY_DN1122_c0_g4_i2.path2
TRINITY_DN233_c0_g2_i1.path1	Pepsico2_Contig2961.path1	TRINITY_DN10891_c0_g2_i1.path3	novel.1221	TRINITY_DN48193_c0_g1_i1.path1
TRINITY_DN42989_c1_g1_i1.path1	TRINITY_DN102464_c0_g1_i1.path2	TRINITY_DN28959_c0_g1_i1.path1	novel.8663	TRINITY_DN97417_c0_g1_i1.path1
TRINITY_DN7472_c0_g3_i1.path1	TRINITY_DN64431_c0_g1_i3.path1	TRINITY_DN25572_c0_g1_i1.path1	TRINITY_DN55735_c1_g1_i1.path1	Pepsico2_Contig13209.path1
TRINITY_DN20282_c0_g1_i3.path1	TRINITY_DN38190_c0_g1_i1.path2	novel.8757	TRINITY_DN5322_c0_g2_i1.path1	novel.5553
novel.7150	TRINITY_DN7897_c2_g1_i3.path1	TRINITY_DN17309_c0_g1_i8.path2	Pepsico2_Contig7348.path1	novel.1831
novel.1120	novel.972	TRINITY_DN20381_c0_g1_i4.path1	novel.7743	novel.2593
TRINITY_DN14132_c0_g2_i2.path1	novel.4474	TRINITY_DN429_c0_g1_i1.path1	Pepsico1_Contig5769.path1	novel.6167
Pepsico1_Contig32400.path1	TRINITY_DN21185_c0_g1_i1.path2	novel.2960	TRINITY_DN10750_c0_g1_i2.path1	TRINITY_DN19446_c0_g4_i1.path3
Pepsico1_Contig33288.path1	TRINITY_DN6829_c1_g1_i1.path1	TRINITY_DN21963_c0_g5_i1.path1	TRINITY_DN16237_c0_g5_i1.path2	novel.7175
TRINITY_DN10342_c1_g1_i1.path1	novel.3981	TRINITY_DN32977_c0_g2_i1.path1	TRINITY_DN27677_c0_g1_i2.path1	TRINITY_DN23948_c0_g2_i1.path1
TRINITY_DN79972_c0_g1_i1.path1	TRINITY_DN53472_c0_g1_i1.path1	Pepsico2_Contig9040.path1	novel.7740	TRINITY_DN6203_c1_g1_i4.path1
TRINITY_DN10572_c0_g2_i1.path1	Pepsico2_Contig18214.path1	Pepsico2_Contig20569.path1	TRINITY_DN44543_c0_g1_i1.path1	TRINITY_DN105250_c0_g1_i1.path3
Pepsico2_Contig1434.path1	TRINITY_DN233_c0_g2_i1.path1	TRINITY_DN16277_c0_g1_i4.path1	Pepsico2_Contig7277.path2	Pepsico2_Contig11843.path1
TRINITY_DN90969_c0_g1_i1.path1	TRINITY_DN45181_c0_g1_i2.path1	Pepsico2_Contig3611.path1	TRINITY_DN77289_c0_g1_i1.path2	TRINITY_DN79319_c0_g1_i1.path1
TRINITY_DN32267_c0_g1_i1.path1	TRINITY_DN3394_c1_g2_i1.path1	TRINITY_DN7934_c2_g5_i1.path2	TRINITY_DN30892_c0_g1_i1.path1	TRINITY_DN69173_c0_g1_i1.path1
TRINITY_DN3104_c1_g2_i1.path1	Pepsico1_Contig5249.path1	Pepsico1_Contig32400.path1	TRINITY_DN83999_c0_g1_i1.path1	TRINITY_DN30113_c1_g1_i1.path1
Pepsico2_Contig8600.path1	TRINITY_DN4502_c2_g1_i1.path1	novel.7956	TRINITY_DN35708_c0_g1_i1.path1	TRINITY_DN13333_c2_g1_i2.path1
TRINITY_DN31290_c1_g1_i1.path1	TRINITY_DN21288_c0_g2_i2.path1	TRINITY_DN11525_c0_g1_i21.path1	TRINITY_DN21624_c0_g1_i1.path1	novel.5137
TRINITY_DN33707_c0_g1_i5.path1	TRINITY_DN8596_c0_g6_i2.path2	TRINITY_DN14129_c0_g1_i5.path1	TRINITY_DN21086_c0_g1_i1.path1	novel.6659
TRINITY_DN33835_c0_g1_i1.path1	TRINITY_DN16277_c0_g1_i4.path1	novel.8995	TRINITY_DN36881_c1_g1_i1.path1	novel.4694
TRINITY_DN47844_c0_g1_i1.path1	Pepsico2_Contig18206.path2	TRINITY_DN12767_c0_g1_i2.path1	TRINITY_DN245_c0_g2_i1.path1	TRINITY_DN71693_c0_g1_i1.path3
novel.7955	TRINITY_DN9426_c0_g1_i3.path1	Pepsico2_Contig2312.path1	Pepsico2_Contig6601.path2	TRINITY_DN19872_c0_g4_i1.path1
TRINITY_DN40534_c0_g1_i1.path1	novel.3480	TRINITY_DN10750_c0_g1_i2.path1	TRINITY_DN18940_c0_g2_i1.path1	TRINITY_DN14351_c0_g1_i2.path1
TRINITY_DN30_c3_g1_i1.path1	TRINITY_DN13294_c1_g1_i1.path1	TRINITY_DN66852_c0_g1_i1.path1	novel.6338	TRINITY_DN16570_c0_g1_i4.path1
TRINITY_DN10190_c0_g1_i5.path1	TRINITY_DN24742_c0_g3_i1.path2	TRINITY_DN32929_c0_g1_i1.path1	TRINITY_DN104793_c0_g1_i1.path1	TRINITY_DN11067_c0_g1_i1.path2
TRINITY_DN50072_c0_g1_i1.path1	novel.4169	TRINITY_DN6578_c0_g1_i14.path3	TRINITY_DN38411_c1_g1_i1.path1	novel.7962
novel.4851	Pepsico1_Contig37308.path1	novel.9255	novel.5824	novel.9707
novel.8682	TRINITY_DN77068_c0_g1_i1.path2	Pepsico1_Contig37533.path4	novel.1517	TRINITY_DN9653_c1_g2_i1.path1
novel.1445	novel.1709	Pepsico2_Contig19460.path2	TRINITY_DN22358_c0_g1_i2.path1	TRINITY_DN2644_c1_g1_i2.path1
TRINITY_DN37171_c0_g1_i1.path1	TRINITY_DN14014_c0_g3_i1.path1	Pepsico2_Contig13176.path1	TRINITY_DN34274_c0_g1_i1.path1	novel.10015
TRINITY_DN24742_c0_g3_i1.path2	TRINITY_DN10164_c0_g1_i10.path1	novel.3585	TRINITY_DN23463_c1_g1_i1.path1	TRINITY_DN44802_c0_g1_i1.path1
TRINITY_DN21706_c0_g1_i3.path1	Pepsico2_Contig11843.path1	novel.2647	Pepsico1_Contig22880.path1	TRINITY_DN68885_c0_g1_i1.path1
novel.1245	TRINITY_DN25572_c0_g1_i1.path2	TRINITY_DN18940_c0_g2_i1.path1	Pepsico1_Contig7932.path1	TRINITY_DN111692_c0_g1_i1.path1
TRINITY_DN59863_c0_g1_i1.path1	TRINITY_DN33572_c0_g2_i1.path2	TRINITY_DN92719_c0_g1_i1.path1	TRINITY_DN76691_c0_g1_i1.path1	TRINITY_DN52679_c0_g1_i1.path2
TRINITY_DN30361_c0_g1_i2.path1	TRINITY_DN65545_c0_g1_i1.path1	novel.7137	novel.5972	TRINITY_DN47515_c0_g1_i2.path1
Pepsico2_Contig12997.path1	Pepsico2_Contig3578.path2	TRINITY_DN1240_c0_g2_i1.path2	novel.1538	novel.3392
Pepsico2_Contig11020.path2	TRINITY_DN32584_c0_g1_i1.path1	TRINITY_DN102445_c0_g1_i1.path1	TRINITY_DN25826_c0_g2_i1.path1	novel.4793
TRINITY_DN684_c1_g1_i1.path1	novel.8714	TRINITY_DN17793_c0_g3_i2.path2	TRINITY_DN44901_c0_g2_i1.path1	TRINITY_DN5491_c1_g5_i1.path1
TRINITY_DN29796_c0_g1_i1.path1	novel.7462	Pepsico1_Contig32793.path1	novel.9245	Pepsico2_Contig21062.path2
TRINITY_DN26906_c0_g1_i7.path1	TRINITY_DN70567_c0_g1_i1.path1	TRINITY_DN99008_c0_g1_i1.path2	Pepsico2_Contig15929.path1	Pepsico2_Contig12291.path1
TRINITY_DN7127_c0_g2_i6.path2	novel.1103	TRINITY_DN9608_c0_g1_i4.path2	TRINITY_DN115544_c0_g1_i1.path1	TRINITY_DN54316_c0_g1_i1.path1
Pepsico2_Contig20774.path2	novel.10307	TRINITY_DN31256_c0_g1_i1.path1	novel.9369	novel.181
TRINITY_DN22879_c0_g1_i2.path1	TRINITY_DN2294_c24_g1_i1.path3	novel.4277	Pepsico2_Contig2259.path2	novel.7743
TRINITY_DN30268_c0_g5_i1.path1	TRINITY_DN18814_c0_g1_i4.path1	novel.3187	TRINITY_DN29057_c0_g1_i1.path1	TRINITY_DN20136_c1_g1_i1.path3
novel.1892	TRINITY_DN40781_c0_g1_i1.path1	TRINITY_DN13544_c0_g1_i2.path1	novel.6809	TRINITY_DN8596_c0_g2_i1.path1
TRINITY_DN80176_c0_g1_i1.path1	TRINITY_DN18897_c2_g1_i1.path1	novel.327	TRINITY_DN22405_c0_g2_i1.path2	TRINITY_DN4225_c0_g1_i11.path1
TRINITY_DN83999_c0_g1_i1.path1	TRINITY_DN50536_c0_g1_i2.path1	TRINITY_DN98917_c0_g1_i1.path1	TRINITY_DN83317_c0_g1_i1.path1	TRINITY_DN91689_c0_g1_i1.path1
novel.6375	TRINITY_DN2354_c0_g1_i4.path2	Pepsico2_Contig2095.path2	novel.5188	TRINITY_DN103622_c0_g1_i1.path1
TRINITY_DN94953_c0_g1_i1.path1	TRINITY_DN65319_c0_g1_i1.path1	novel.1609	TRINITY_DN36770_c2_g1_i1.path2	novel.9676
TRINITY_DN36320_c0_g1_i2.path2	TRINITY_DN10372_c0_g2_i1.path1	TRINITY_DN63138_c0_g1_i1.path2	novel.2898	novel.3087
TRINITY_DN11478_c0_g1_i4.path2	novel.1445	novel.7062	novel.5473	novel.9349
novel.7602	Pepsico1_Contig37736.path1	Pepsico1_Contig4828.path2	TRINITY_DN9250_c0_g2_i2.path2	Pepsico2_Contig11020.path1
TRINITY_DN6846_c0_g2_i1.path1	novel.7149	TRINITY_DN27737_c0_g1_i1.path1	novel.4528	novel.1576
Pepsico2_Contig19268.path3	TRINITY_DN74622_c0_g1_i1.path1	TRINITY_DN37282_c0_g1_i1.path2	TRINITY_DN20387_c0_g1_i1.path1	TRINITY_DN25044_c0_g1_i3.path1
TRINITY_DN15334_c0_g1_i2.path2	Pepsico2_Contig15659.path2	TRINITY_DN22054_c0_g1_i4.path1	novel.9756	novel.7719
TRINITY_DN4456_c0_g2_i10.path1	novel.5071	TRINITY_DN31490_c0_g2_i1.path1	TRINITY_DN10990_c0_g2_i1.path2	novel.6233
Pepsico2_Contig12291.path1	TRINITY_DN26038_c0_g6_i1.path1	Pepsico2_Contig7195.path2	TRINITY_DN15541_c0_g2_i1.path1	TRINITY_DN11195_c1_g1_i1.path1
Pepsico1_Contig6170.path1	Pepsico2_Contig13697.path1	Pepsico2_Contig10852.path1	Pepsico2_Contig15299.path2	TRINITY_DN75269_c0_g1_i1.path1
TRINITY_DN28718_c0_g4_i1.path1	Pepsico1_Contig1433.path1	novel.108	novel.7719	TRINITY_DN9309_c0_g1_i2.path1
novel.8899	novel.3394	novel.6057	Pepsico1_Contig1940.path1	novel.10538
TRINITY_DN12280_c0_g2_i1.path2	TRINITY_DN7934_c2_g3_i1.path1	novel.7327	TRINITY_DN35942_c0_g1_i1.path2	Pepsico2_Contig16986.path2
TRINITY_DN27737_c0_g1_i1.path1	Pepsico1_Contig19917.path1	Pepsico2_Contig2036.path2	Pepsico1_Contig6170.path1	novel.7636
Pepsico1_Contig6988.path1	TRINITY_DN923_c0_g3_i1.path1	TRINITY_DN26038_c0_g6_i1.path1	TRINITY_DN7072_c5_g1_i2.path1	Pepsico2_Contig7672.path1
TRINITY_DN32245_c0_g3_i1.path2	novel.1729	TRINITY_DN10812_c0_g1_i2.path1	novel.3513	TRINITY_DN86160_c0_g1_i1.path1
Pepsico1_Contig3132.path4	Pepsico2_Contig17047.path1	novel.4517	TRINITY_DN69493_c0_g1_i1.path1	novel.9855
TRINITY_DN1665_c1_g1_i1.path1	TRINITY_DN18924_c0_g1_i1.path1	Pepsico2_Contig21012.path1	TRINITY_DN7066_c0_g1_i2.path1	novel.3659
Pepsico2_Contig7217.path2	TRINITY_DN25489_c0_g1_i1.path1	TRINITY_DN19259_c1_g1_i1.path1	TRINITY_DN20519_c0_g1_i1.path1	TRINITY_DN8587_c1_g1_i1.path1
TRINITY_DN12215_c0_g1_i3.path1	TRINITY_DN65812_c0_g1_i1.path2	novel.2760	TRINITY_DN8789_c0_g2_i3.path1	novel.9409
TRINITY_DN21473_c0_g1_i1.path1	novel.1347	TRINITY_DN48193_c0_g1_i1.path1	TRINITY_DN99345_c0_g1_i1.path1	TRINITY_DN94711_c0_g1_i1.path2
novel.10187	TRINITY_DN27300_c0_g1_i1.path1	TRINITY_DN26499_c0_g3_i2.path2	TRINITY_DN32929_c0_g1_i1.path1	TRINITY_DN21074_c0_g1_i1.path1
TRINITY_DN24644_c0_g2_i1.path1	TRINITY_DN13350_c0_g1_i1.path1	TRINITY_DN17373_c0_g1_i1.path1	TRINITY_DN1380_c0_g1_i2.path2	TRINITY_DN7897_c2_g1_i3.path1
TRINITY_DN52841_c0_g1_i1.path1	novel.4813	novel.1490	TRINITY_DN84422_c0_g1_i1.path1	TRINITY_DN6677_c0_g2_i2.path1
TRINITY_DN22267_c0_g2_i1.path1	TRINITY_DN40968_c0_g1_i1.path1	TRINITY_DN25489_c0_g1_i1.path1	TRINITY_DN3591_c0_g1_i2.path1	Pepsico2_Contig17287.path1
Pepsico1_Contig5050.path2	novel.10246	novel.9394	TRINITY_DN98076_c0_g1_i1.path1	TRINITY_DN18237_c1_g3_i1.path1
TRINITY_DN8095_c0_g1_i3.path1	TRINITY_DN73289_c0_g1_i1.path1	TRINITY_DN32602_c0_g1_i1.path2	novel.7453	TRINITY_DN197_c2_g1_i1.path1
TRINITY_DN36154_c1_g1_i1.path1	novel.3947	TRINITY_DN19482_c0_g2_i1.path1	TRINITY_DN4092_c0_g1_i3.path2	TRINITY_DN11203_c0_g1_i1.path1
TRINITY_DN87764_c0_g1_i1.path1	TRINITY_DN36488_c0_g2_i1.path1	TRINITY_DN28969_c2_g1_i1.path1	novel.4813	TRINITY_DN8599_c1_g1_i3.path3
novel.8909	novel.2457	TRINITY_DN26200_c0_g1_i1.path1	TRINITY_DN68885_c0_g1_i1.path1	TRINITY_DN7032_c0_g6_i1.path2
TRINITY_DN6421_c0_g1_i4.path1	TRINITY_DN76026_c0_g1_i1.path1	TRINITY_DN16231_c0_g1_i2.path2	TRINITY_DN59745_c0_g1_i1.path1	TRINITY_DN12126_c0_g3_i1.path1
TRINITY_DN8138_c0_g4_i5.path1	TRINITY_DN9291_c0_g1_i1.path1	TRINITY_DN6722_c0_g1_i1.path1	novel.4985	Pepsico1_Contig36152.path1
TRINITY_DN11147_c0_g1_i1.path2	Pepsico1_Contig882.path1	TRINITY_DN17563_c0_g1_i6.path1	TRINITY_DN13542_c0_g1_i1.path1	TRINITY_DN5540_c0_g1_i2.path1
novel.3513	TRINITY_DN37195_c1_g1_i1.path2	TRINITY_DN70066_c0_g1_i1.path1	novel.10538	TRINITY_DN38823_c0_g2_i1.path1
novel.6228	novel.7840	novel.8592	novel.346	TRINITY_DN9659_c0_g2_i1.path2
TRINITY_DN62350_c0_g1_i1.path1	novel.6146	novel.4217	TRINITY_DN8973_c0_g2_i2.path1	TRINITY_DN108775_c0_g1_i1.path3
TRINITY_DN14054_c0_g1_i2.path1	TRINITY_DN7064_c1_g1_i4.path1	TRINITY_DN14202_c0_g1_i1.path1	novel.5264	novel.4528
novel.2	TRINITY_DN64120_c0_g1_i1.path1	TRINITY_DN28792_c0_g2_i1.path1	novel.9112	TRINITY_DN16103_c0_g1_i1.path2
TRINITY_DN14730_c0_g1_i3.path1	TRINITY_DN25628_c0_g1_i1.path1	novel.10015	Pepsico2_Contig3454.path1	TRINITY_DN98103_c0_g1_i1.path1
TRINITY_DN5970_c0_g2_i1.path2	Pepsico2_Contig11122.path1	Pepsico2_Contig15875.path2	TRINITY_DN22779_c0_g1_i1.path1	Pepsico1_Contig6170.path1
Pepsico1_Contig29617.path1	TRINITY_DN10686_c1_g1_i1.path1	TRINITY_DN18237_c1_g1_i2.path1	Pepsico2_Contig8514.path1	TRINITY_DN112338_c0_g1_i1.path1
TRINITY_DN10700_c0_g2_i1.path1	Pepsico1_Contig17817.path1	TRINITY_DN6938_c0_g4_i1.path1	TRINITY_DN51484_c0_g2_i1.path2	novel.5224
novel.7334	TRINITY_DN53177_c0_g1_i3.path2	Pepsico1_Contig7066.path2	novel.7336	TRINITY_DN97491_c0_g1_i1.path1
TRINITY_DN9693_c0_g1_i7.path1	TRINITY_DN40050_c0_g1_i1.path3	Pepsico2_Contig1491.path1	TRINITY_DN2170_c1_g1_i1.path2	novel.6685
TRINITY_DN26642_c0_g1_i3.path1	novel.826	Pepsico1_Contig3075.path2	novel.5523	TRINITY_DN60842_c0_g3_i3.path1
Pepsico2_Contig643.path2	TRINITY_DN6573_c0_g1_i4.path1	novel.2997	TRINITY_DN16103_c0_g1_i1.path2	TRINITY_DN81145_c0_g1_i1.path1
TRINITY_DN25777_c0_g1_i1.path4	TRINITY_DN31290_c1_g1_i1.path1	TRINITY_DN16742_c0_g3_i2.path1	TRINITY_DN103489_c0_g1_i1.path1	novel.674
TRINITY_DN5014_c0_g4_i1.path1	TRINITY_DN61511_c1_g1_i1.path1	TRINITY_DN31614_c0_g1_i3.path1	TRINITY_DN79795_c0_g1_i1.path1	novel.8132
novel.8249	novel.1343	TRINITY_DN10372_c0_g2_i1.path1	Pepsico1_Contig1024.path1	TRINITY_DN37533_c0_g1_i1.path1
TRINITY_DN95555_c0_g1_i1.path1	Pepsico2_Contig17883.path1	novel.9998	TRINITY_DN6722_c0_g1_i1.path1	Pepsico2_Contig12299.path1
TRINITY_DN71693_c0_g1_i1.path3	Pepsico2_Contig7831.path1	Pepsico2_Contig6624.path1	Pepsico1_Contig5499.path1	TRINITY_DN42989_c1_g1_i1.path1
novel.7837	novel.2845	TRINITY_DN38411_c1_g1_i1.path1	TRINITY_DN112139_c0_g1_i1.path1	TRINITY_DN110788_c0_g1_i1.path1
novel.7202	TRINITY_DN26115_c0_g2_i3.path1	Pepsico1_Contig17431.path2	novel.9695	TRINITY_DN26642_c0_g1_i3.path1
TRINITY_DN5893_c0_g1_i1.path1	Pepsico1_Contig7006.path1	TRINITY_DN321_c2_g1_i4.path2	TRINITY_DN22076_c0_g2_i1.path1	novel.4778
Pepsico2_Contig2735.path1	TRINITY_DN34147_c0_g1_i7.path1	novel.68	novel.6846	TRINITY_DN9971_c0_g1_i1.path1
TRINITY_DN35464_c0_g1_i1.path1	Pepsico2_Contig15585.path1	TRINITY_DN10891_c2_g1_i1.path1	novel.6786	novel.3908
TRINITY_DN21547_c0_g2_i1.path1	TRINITY_DN15509_c2_g1_i1.path2	TRINITY_DN29283_c0_g1_i1.path2	TRINITY_DN8445_c0_g1_i4.path1	TRINITY_DN25913_c0_g1_i2.path2
TRINITY_DN22245_c0_g1_i1.path1	TRINITY_DN41641_c0_g1_i2.path1	TRINITY_DN576_c0_g3_i8.path2	novel.1527	novel.920
novel.492	novel.6339	Pepsico2_Contig14060.path1	TRINITY_DN22453_c1_g3_i1.path2	TRINITY_DN80060_c0_g1_i1.path3
Pepsico2_Contig8571.path1	TRINITY_DN45916_c0_g1_i1.path1	TRINITY_DN104075_c0_g1_i1.path1	TRINITY_DN6606_c0_g1_i1.path1	TRINITY_DN21931_c0_g1_i2.path1
novel.7978	TRINITY_DN1734_c1_g1_i1.path1	TRINITY_DN32267_c0_g1_i1.path1	novel.2971	TRINITY_DN60222_c0_g1_i2.path1
novel.8923	TRINITY_DN12547_c0_g1_i1.path1	novel.1106	TRINITY_DN27247_c0_g1_i1.path1	TRINITY_DN49782_c0_g1_i1.path1
TRINITY_DN15688_c0_g4_i1.path1	TRINITY_DN83410_c0_g1_i1.path1	TRINITY_DN50492_c0_g2_i1.path2	Pepsico2_Contig20774.path2	novel.9927
TRINITY_DN86160_c0_g1_i1.path1	Pepsico2_Contig17550.path2	TRINITY_DN101486_c0_g1_i1.path2	novel.2327	novel.6932
TRINITY_DN7501_c0_g2_i1.path1	novel.4469	Pepsico1_Contig5216.path1	TRINITY_DN9390_c0_g1_i1.path1	TRINITY_DN14375_c0_g1_i3.path1
TRINITY_DN2863_c0_g1_i3.path2	novel.3173	TRINITY_DN7854_c0_g1_i1.path2	TRINITY_DN73377_c0_g1_i1.path1	novel.9475
novel.7462	novel.2539	Pepsico2_Contig8115.path1	novel.1492	TRINITY_DN8896_c0_g1_i3.path2
TRINITY_DN429_c0_g1_i1.path1	novel.6132	TRINITY_DN19901_c0_g2_i1.path1	TRINITY_DN65812_c0_g1_i1.path2	novel.1719
TRINITY_DN8969_c0_g1_i5.path2	TRINITY_DN17373_c0_g1_i1.path1	TRINITY_DN17531_c0_g1_i5.path2	TRINITY_DN4463_c0_g1_i6.path1	TRINITY_DN103140_c0_g1_i1.path2
novel.7289	TRINITY_DN54316_c0_g1_i1.path1	novel.8987	TRINITY_DN14375_c0_g1_i3.path1	novel.9702
novel.2972	TRINITY_DN9897_c0_g1_i1.path1	TRINITY_DN47146_c0_g1_i1.path2	novel.9698	TRINITY_DN11360_c0_g2_i1.path1
Pepsico2_Contig13925.path2	TRINITY_DN20497_c0_g1_i1.path4	novel.6711	Pepsico1_Contig4308.path1	TRINITY_DN56360_c0_g1_i2.path1
TRINITY_DN49442_c0_g1_i1.path1	novel.921	Pepsico1_Contig37632.path2	novel.107	TRINITY_DN98417_c0_g1_i1.path1
TRINITY_DN14623_c1_g2_i1.path1	novel.9919	Pepsico1_Contig33503.path2	novel.2744	Pepsico1_Contig8039.path1
TRINITY_DN6267_c4_g2_i1.path1	Pepsico2_Contig3845.path1	TRINITY_DN48507_c0_g1_i1.path1	novel.9941	TRINITY_DN22465_c0_g1_i1.path1
TRINITY_DN32157_c1_g1_i2.path1	Pepsico2_Contig4681.path1	novel.7660	TRINITY_DN37359_c0_g1_i1.path1	TRINITY_DN16277_c0_g1_i4.path1
novel.1667	TRINITY_DN15784_c0_g1_i6.path1	novel.4813	novel.9983	TRINITY_DN17531_c1_g1_i4.path2
TRINITY_DN5542_c0_g3_i1.path1	TRINITY_DN12927_c0_g2_i1.path1	TRINITY_DN16544_c0_g2_i2.path1	Pepsico1_Contig3833.path2	TRINITY_DN14093_c0_g1_i3.path1
TRINITY_DN9797_c0_g1_i1.path2	TRINITY_DN33640_c0_g3_i1.path1	TRINITY_DN2850_c0_g3_i1.path1	novel.10244	TRINITY_DN65101_c0_g2_i1.path3
TRINITY_DN34931_c0_g2_i1.path1	Pepsico2_Contig13875.path1	TRINITY_DN4538_c0_g1_i3.path2	novel.7846	TRINITY_DN18034_c0_g1_i1.path1
novel.9639	TRINITY_DN15088_c0_g1_i1.path1	novel.8953	novel.50	TRINITY_DN18723_c2_g1_i1.path1
TRINITY_DN16357_c0_g3_i1.path1	novel.7304	novel.2802	novel.7771	TRINITY_DN50909_c0_g1_i1.path1
TRINITY_DN51026_c0_g1_i1.path1	TRINITY_DN38411_c1_g1_i1.path1	TRINITY_DN24254_c0_g1_i2.path1	TRINITY_DN30150_c0_g1_i1.path1	TRINITY_DN15850_c0_g1_i2.path1
novel.864	Pepsico2_Contig10729.path1	Pepsico2_Contig18182.path4	TRINITY_DN27399_c0_g1_i3.path2	TRINITY_DN99008_c0_g1_i1.path2
novel.1793	TRINITY_DN36562_c0_g1_i1.path2	TRINITY_DN105250_c0_g1_i1.path1	TRINITY_DN10572_c0_g2_i1.path1	novel.3682
novel.7092	TRINITY_DN6139_c0_g2_i2.path1	TRINITY_DN19079_c0_g1_i1.path1	novel.10292	novel.780
novel.7044	novel.7636	TRINITY_DN44824_c0_g1_i1.path3	Pepsico1_Contig35319.path1	TRINITY_DN41102_c2_g1_i1.path1
novel.9706	TRINITY_DN81266_c0_g1_i1.path1	TRINITY_DN38823_c0_g2_i1.path1	novel.6182	novel.3513
TRINITY_DN58060_c0_g1_i1.path1	TRINITY_DN39623_c0_g1_i1.path1	TRINITY_DN6613_c0_g1_i6.path1	TRINITY_DN27737_c0_g1_i1.path1	novel.9682
TRINITY_DN38413_c0_g1_i1.path1	TRINITY_DN60836_c0_g1_i1.path1	Pepsico1_Contig4680.path1	TRINITY_DN47408_c0_g2_i1.path1	Pepsico1_Contig36233.path1
TRINITY_DN56459_c0_g1_i1.path1	novel.5972	novel.2265	novel.7602	TRINITY_DN33085_c0_g1_i1.path1
Pepsico2_Contig19932.path1	TRINITY_DN24835_c0_g4_i1.path1	Pepsico2_Contig7831.path1	novel.7046	novel.2959
TRINITY_DN16513_c0_g1_i5.path1	novel.8823	TRINITY_DN45179_c0_g1_i3.path2	novel.4851	TRINITY_DN39623_c0_g1_i1.path2
novel.4897	novel.9409	TRINITY_DN10477_c1_g1_i6.path2	TRINITY_DN50492_c0_g2_i1.path2	Pepsico2_Contig14548.path1
TRINITY_DN2294_c24_g1_i1.path3	TRINITY_DN8978_c0_g1_i11.path1	novel.1221	TRINITY_DN20124_c1_g1_i1.path3	novel.346
TRINITY_DN879_c0_g2_i1.path1	TRINITY_DN23743_c0_g1_i1.path1	novel.8103	Pepsico1_Contig779.path1	novel.2744
TRINITY_DN47488_c0_g2_i1.path1	TRINITY_DN4885_c0_g2_i1.path1	TRINITY_DN16796_c0_g1_i2.path2	TRINITY_DN16357_c0_g3_i1.path1	TRINITY_DN9250_c0_g2_i2.path2
novel.5824	novel.7289	novel.4169	novel.3218	TRINITY_DN30113_c0_g1_i1.path1
TRINITY_DN23649_c0_g1_i2.path2	TRINITY_DN11150_c0_g1_i1.path1	Pepsico2_Contig2961.path1	novel.349	TRINITY_DN93138_c0_g1_i1.path1
TRINITY_DN38876_c3_g1_i1.path1	TRINITY_DN9412_c0_g2_i1.path1	TRINITY_DN12341_c0_g1_i5.path2	TRINITY_DN18829_c1_g1_i1.path3	TRINITY_DN16796_c0_g1_i2.path2
novel.9351	novel.5824	TRINITY_DN13905_c0_g1_i1.path2	Pepsico2_Contig13176.path1	novel.918
TRINITY_DN91942_c0_g1_i1.path1	TRINITY_DN27737_c0_g1_i1.path1	TRINITY_DN22413_c0_g1_i1.path1	TRINITY_DN65886_c0_g1_i1.path1	TRINITY_DN90744_c0_g1_i1.path1
novel.564	TRINITY_DN105715_c0_g1_i1.path1	novel.6405	TRINITY_DN14036_c1_g1_i3.path2	novel.4012
TRINITY_DN16843_c0_g1_i1.path2	Pepsico2_Contig8305.path1	TRINITY_DN17708_c1_g2_i1.path2	novel.6058	Pepsico2_Contig19697.path1
TRINITY_DN8008_c0_g2_i1.path1	Pepsico2_Contig6342.path2	TRINITY_DN12193_c0_g2_i1.path2	TRINITY_DN5542_c0_g3_i1.path1	TRINITY_DN9390_c0_g1_i1.path1
TRINITY_DN21432_c0_g2_i1.path1	TRINITY_DN19135_c0_g3_i1.path1	TRINITY_DN21473_c0_g1_i1.path1	TRINITY_DN7064_c1_g1_i4.path1	Pepsico1_Contig4899.path1
Pepsico2_Contig11016.path1	Pepsico1_Contig31806.path1	TRINITY_DN18634_c0_g1_i6.path1	novel.6499	novel.9952
novel.4309	TRINITY_DN10241_c0_g2_i1.path1	Pepsico2_Contig9614.path3	novel.5815	Pepsico2_Contig13770.path2
TRINITY_DN32814_c0_g1_i1.path2	TRINITY_DN112261_c0_g1_i1.path1	TRINITY_DN77812_c0_g1_i1.path1	Pepsico1_Contig1795.path2	TRINITY_DN60253_c0_g1_i1.path1
TRINITY_DN18857_c1_g2_i1.path1	novel.8514	TRINITY_DN33572_c0_g2_i1.path2	TRINITY_DN10324_c0_g1_i2.path1	novel.4444
TRINITY_DN88673_c0_g1_i1.path1	Pepsico2_Contig5930.path2	TRINITY_DN87_c0_g1_i1.path2	TRINITY_DN3664_c0_g2_i1.path1	TRINITY_DN40672_c0_g1_i1.path2
TRINITY_DN10416_c0_g5_i1.path3	TRINITY_DN12922_c0_g1_i4.path2	TRINITY_DN27607_c0_g1_i10.path1	TRINITY_DN24551_c0_g1_i1.path1	TRINITY_DN64736_c0_g1_i1.path1
TRINITY_DN28950_c0_g1_i1.path1	TRINITY_DN7934_c2_g5_i1.path1	TRINITY_DN54876_c0_g1_i1.path1	TRINITY_DN47146_c0_g1_i1.path2	novel.1438
Pepsico2_Contig1448.path1	novel.4851	TRINITY_DN22497_c1_g2_i1.path1	TRINITY_DN10337_c0_g1_i8.path1	novel.9395
Pepsico1_Contig556.path1	novel.50	novel.2863	TRINITY_DN6703_c2_g1_i1.path1	novel.8916
novel.7719	TRINITY_DN6808_c0_g3_i1.path2	TRINITY_DN17789_c0_g1_i2.path3	TRINITY_DN3922_c0_g1_i1.path3	novel.6499
TRINITY_DN17783_c0_g1_i3.path1	TRINITY_DN37635_c0_g1_i1.path4	TRINITY_DN87900_c0_g1_i1.path1	novel.2980	TRINITY_DN56948_c0_g1_i1.path1
TRINITY_DN9653_c1_g1_i1.path1	Pepsico2_Contig17253.path1	TRINITY_DN11360_c0_g2_i1.path1	Pepsico1_Contig31535.path2	TRINITY_DN19259_c1_g1_i1.path1
novel.2992	TRINITY_DN1139_c0_g1_i1.path1	TRINITY_DN6497_c0_g1_i2.path1	TRINITY_DN7631_c0_g1_i2.path1	TRINITY_DN26530_c1_g1_i1.path2
TRINITY_DN6441_c0_g1_i2.path2	Pepsico1_Contig36060.path1	TRINITY_DN18757_c0_g2_i1.path1	novel.6343	novel.2273
novel.7703	TRINITY_DN109564_c0_g1_i1.path1	TRINITY_DN106656_c0_g1_i1.path1	TRINITY_DN30736_c0_g1_i1.path1	TRINITY_DN30973_c0_g2_i1.path1
TRINITY_DN59775_c0_g1_i1.path1	TRINITY_DN111834_c0_g1_i1.path1	TRINITY_DN27051_c1_g1_i1.path1	TRINITY_DN64120_c0_g1_i1.path1	TRINITY_DN36263_c0_g1_i1.path1
Pepsico2_Contig14022.path1	TRINITY_DN19110_c0_g3_i1.path1	Pepsico1_Contig32727.path2	TRINITY_DN19482_c0_g2_i1.path1	novel.1772
TRINITY_DN22518_c0_g1_i2.path1	TRINITY_DN20124_c1_g1_i1.path3	Pepsico1_Contig36233.path1	TRINITY_DN86160_c0_g1_i1.path1	TRINITY_DN92240_c0_g1_i1.path1
Pepsico2_Contig10170.path1	TRINITY_DN34756_c0_g1_i5.path1	novel.9369	Pepsico1_Contig28670.path1	novel.2677
TRINITY_DN23178_c0_g1_i1.path1	Pepsico2_Contig20459.path2	TRINITY_DN21185_c0_g1_i1.path2	TRINITY_DN36559_c0_g1_i1.path3	TRINITY_DN27525_c0_g1_i1.path1
TRINITY_DN21074_c0_g1_i1.path1	Pepsico2_Contig3632.path2	TRINITY_DN30783_c0_g1_i6.path1	TRINITY_DN20200_c1_g1_i5.path5	TRINITY_DN37891_c0_g3_i1.path1
Pepsico1_Contig31709.path1	Pepsico2_Contig18121.path1	novel.1834	TRINITY_DN19079_c0_g1_i1.path1	TRINITY_DN52809_c0_g2_i1.path1
TRINITY_DN4885_c0_g3_i1.path1	TRINITY_DN36320_c0_g1_i2.path2	TRINITY_DN20324_c0_g1_i1.path1	TRINITY_DN10366_c1_g3_i1.path1	Pepsico2_Contig21012.path1
TRINITY_DN22824_c0_g2_i1.path1	Pepsico2_Contig17090.path1	TRINITY_DN90744_c0_g1_i1.path1	novel.4509	TRINITY_DN20153_c1_g1_i1.path1
TRINITY_DN24932_c0_g1_i1.path1	TRINITY_DN14351_c0_g1_i2.path1	TRINITY_DN95555_c0_g1_i1.path1	TRINITY_DN21074_c0_g1_i1.path1	novel.134
novel.4470	TRINITY_DN38261_c0_g1_i1.path1	novel.6027	TRINITY_DN55013_c0_g1_i1.path2	TRINITY_DN13241_c0_g4_i1.path1
TRINITY_DN17278_c1_g1_i1.path1	TRINITY_DN18857_c1_g2_i1.path1	TRINITY_DN87787_c0_g1_i1.path1	Pepsico1_Contig8151.path2	TRINITY_DN88203_c0_g1_i1.path1
TRINITY_DN90664_c0_g1_i1.path1	TRINITY_DN26813_c0_g1_i5.path1	novel.6256	Pepsico1_Contig5655.path1	TRINITY_DN111546_c0_g1_i1.path1
novel.6689	TRINITY_DN7412_c0_g1_i1.path1	TRINITY_DN25012_c0_g2_i2.path1	TRINITY_DN15164_c0_g1_i4.path1	TRINITY_DN74024_c0_g1_i1.path1
novel.1766	novel.6828	novel.2969	TRINITY_DN30123_c0_g1_i1.path1	TRINITY_DN23207_c0_g1_i1.path1
TRINITY_DN21288_c0_g2_i2.path1	TRINITY_DN8779_c0_g2_i3.path1	Pepsico1_Contig36060.path1	Pepsico1_Contig7370.path1	TRINITY_DN14330_c0_g1_i1.path1
novel.107	novel.3826	TRINITY_DN108489_c0_g1_i1.path1	TRINITY_DN31614_c0_g1_i3.path1	TRINITY_DN12443_c0_g2_i1.path1
Pepsico1_Contig2227.path2	TRINITY_DN11067_c0_g1_i1.path2	TRINITY_DN7205_c0_g1_i1.path3	TRINITY_DN6938_c0_g4_i1.path1	novel.4277
TRINITY_DN24779_c0_g1_i1.path1	novel.1667	TRINITY_DN14676_c0_g1_i1.path1	Pepsico1_Contig33288.path1	TRINITY_DN36478_c0_g1_i3.path1
TRINITY_DN106796_c0_g1_i1.path1	novel.4018	TRINITY_DN37195_c1_g1_i1.path2	novel.9370	novel.83
TRINITY_DN43323_c0_g4_i1.path1	TRINITY_DN17278_c1_g1_i1.path1	TRINITY_DN64120_c0_g1_i1.path1	TRINITY_DN5752_c0_g1_i1.path1	TRINITY_DN78535_c0_g1_i1.path1
Pepsico2_Contig10040.path1	TRINITY_DN22433_c0_g1_i1.path1	TRINITY_DN35718_c0_g2_i4.path1	TRINITY_DN8978_c0_g1_i11.path1	novel.3689
TRINITY_DN30789_c0_g2_i1.path2	TRINITY_DN10750_c0_g1_i2.path1	TRINITY_DN24731_c0_g1_i1.path1	Pepsico1_Contig550.path1	TRINITY_DN75456_c0_g1_i1.path1
TRINITY_DN18237_c1_g1_i2.path1	TRINITY_DN55073_c0_g1_i1.path1	Pepsico1_Contig5337.path1	novel.7304	TRINITY_DN50536_c0_g1_i2.path1
TRINITY_DN310_c1_g1_i3.path1	novel.9682	TRINITY_DN71565_c0_g1_i1.path1	novel.4469	Pepsico2_Contig6066.path1
TRINITY_DN51801_c0_g3_i2.path1	TRINITY_DN9373_c0_g1_i6.path1	novel.8313	TRINITY_DN65101_c0_g2_i1.path1	TRINITY_DN20133_c0_g1_i3.path1
TRINITY_DN14626_c0_g1_i1.path2	Pepsico1_Contig2677.path1	TRINITY_DN42400_c4_g1_i1.path1	novel.6358	TRINITY_DN22117_c0_g1_i3.path1
novel.5942	novel.6167	TRINITY_DN21650_c0_g3_i2.path1	TRINITY_DN41325_c0_g1_i1.path2	novel.625
Pepsico2_Contig10700.path1	TRINITY_DN4225_c0_g1_i11.path1	TRINITY_DN92366_c0_g1_i1.path1	TRINITY_DN20712_c0_g1_i1.path1	TRINITY_DN12176_c0_g1_i8.path1
novel.2121	novel.2853	TRINITY_DN42370_c0_g1_i1.path1	TRINITY_DN92652_c0_g1_i1.path2	novel.4083
TRINITY_DN4885_c0_g4_i1.path1	novel.8443	novel.8224	TRINITY_DN17980_c0_g1_i4.path1	TRINITY_DN60387_c0_g2_i3.path1
TRINITY_DN103622_c0_g1_i1.path1	novel.1177	TRINITY_DN23178_c0_g1_i1.path1	Pepsico1_Contig14704.path1	TRINITY_DN95000_c0_g1_i1.path2
TRINITY_DN9650_c0_g2_i1.path1	novel.8757	TRINITY_DN25430_c0_g1_i2.path2	TRINITY_DN5014_c0_g4_i1.path1	TRINITY_DN23201_c0_g1_i2.path1
TRINITY_DN10372_c0_g2_i1.path1	TRINITY_DN16237_c0_g3_i1.path2	TRINITY_DN42422_c0_g1_i2.path1	Pepsico2_Contig2458.path1	TRINITY_DN19684_c0_g1_i6.path1
TRINITY_DN21259_c0_g1_i1.path1	TRINITY_DN16511_c0_g1_i6.path1	novel.9682	TRINITY_DN17993_c0_g1_i5.path1	TRINITY_DN95555_c0_g1_i1.path1
novel.267	novel.395	novel.921	TRINITY_DN22822_c0_g1_i2.path2	TRINITY_DN58831_c0_g1_i1.path3
novel.3344	TRINITY_DN12387_c0_g1_i1.path1	novel.9353	TRINITY_DN58751_c0_g1_i1.path1	TRINITY_DN27529_c0_g1_i1.path1
Pepsico2_Contig2029.path1	TRINITY_DN37508_c0_g2_i1.path1	TRINITY_DN16237_c0_g3_i1.path2	TRINITY_DN34212_c0_g2_i3.path1	Pepsico2_Contig16813.path2
novel.4789	TRINITY_DN34600_c0_g1_i1.path1	novel.9130	Pepsico1_Contig27163.path2	novel.6124
TRINITY_DN6267_c4_g5_i1.path1	TRINITY_DN36154_c1_g1_i1.path2	TRINITY_DN102878_c0_g1_i1.path1	TRINITY_DN9600_c0_g1_i1.path1	TRINITY_DN47488_c0_g2_i1.path1
TRINITY_DN77068_c0_g1_i1.path2	novel.1106	TRINITY_DN21044_c2_g1_i1.path3	novel.9682	TRINITY_DN24482_c0_g1_i3.path1
novel.1221	novel.7175	TRINITY_DN76026_c0_g1_i1.path1	Pepsico2_Contig6836.path1	novel.836
Pepsico2_Contig4870.path1	TRINITY_DN62350_c0_g1_i1.path1	TRINITY_DN9734_c0_g2_i1.path1	Pepsico1_Contig7487.path1	TRINITY_DN42098_c0_g1_i1.path1
TRINITY_DN32750_c1_g4_i1.path1	Pepsico2_Contig3519.path1	novel.399	TRINITY_DN18688_c0_g3_i2.path1	TRINITY_DN86768_c0_g1_i1.path1
Pepsico2_Contig9089.path1	TRINITY_DN72299_c0_g1_i1.path1	TRINITY_DN18292_c0_g3_i1.path1	TRINITY_DN8008_c0_g2_i1.path1	TRINITY_DN944_c3_g1_i1.path1
TRINITY_DN31317_c1_g1_i2.path1	novel.4217	TRINITY_DN8732_c0_g1_i10.path1	novel.1101	novel.2865
TRINITY_DN21352_c0_g2_i1.path1	TRINITY_DN52145_c0_g1_i1.path4	TRINITY_DN19042_c0_g1_i1.path1	TRINITY_DN10812_c0_g1_i2.path1	novel.6356
TRINITY_DN48054_c2_g1_i1.path1	TRINITY_DN42854_c0_g1_i1.path1	TRINITY_DN14061_c0_g2_i1.path2	Pepsico2_Contig18257.path1	novel.8253
novel.9409	TRINITY_DN4492_c0_g1_i3.path1	novel.7295	TRINITY_DN26300_c0_g2_i1.path1	novel.6330
Pepsico2_Contig9614.path3	TRINITY_DN90969_c0_g1_i1.path1	Pepsico2_Contig6772.path1	TRINITY_DN34811_c0_g1_i1.path1	Pepsico1_Contig35319.path1
novel.4277	Pepsico2_Contig9464.path1	TRINITY_DN38578_c0_g4_i1.path1	novel.6375	TRINITY_DN29020_c0_g1_i2.path1
novel.4836	novel.1101	Pepsico1_Contig4467.path1	Pepsico1_Contig7368.path1	Pepsico2_Contig2458.path1
TRINITY_DN15377_c0_g1_i2.path1	Pepsico2_Contig7466.path1	Pepsico1_Contig3957.path1	TRINITY_DN1258_c0_g8_i1.path2	TRINITY_DN22880_c0_g2_i2.path1
novel.8714	novel.1777	TRINITY_DN27525_c0_g1_i1.path1	novel.348	novel.3981
novel.9389	novel.9510	Pepsico2_Contig12504.path1	TRINITY_DN15688_c0_g4_i1.path1	TRINITY_DN42718_c0_g1_i1.path1
TRINITY_DN4_c0_g1_i6.path1	TRINITY_DN18231_c0_g1_i1.path1	TRINITY_DN32347_c0_g2_i2.path4	TRINITY_DN103622_c0_g1_i1.path1	TRINITY_DN64231_c0_g1_i1.path3
TRINITY_DN22229_c0_g2_i1.path1	novel.4180	TRINITY_DN37898_c0_g1_i2.path1	novel.8465	TRINITY_DN51163_c0_g2_i1.path2
novel.1834	Pepsico1_Contig1269.path1	TRINITY_DN60834_c0_g1_i1.path1	novel.2932	TRINITY_DN11076_c0_g1_i1.path1
TRINITY_DN31956_c0_g2_i1.path1	Pepsico2_Contig12502.path1	novel.67	TRINITY_DN9659_c0_g2_i1.path2	novel.7169
TRINITY_DN28465_c0_g2_i1.path1	Pepsico2_Contig13822.path1	novel.8661	novel.8511	novel.8829
Pepsico1_Contig1102.path1	TRINITY_DN15639_c0_g1_i2.path1	novel.3934	novel.5942	novel.8146
TRINITY_DN18736_c0_g5_i1.path2	TRINITY_DN20324_c0_g1_i1.path1	novel.8492	novel.1801	TRINITY_DN86093_c0_g1_i1.path1
TRINITY_DN50536_c0_g1_i2.path1	TRINITY_DN28969_c1_g1_i1.path1	TRINITY_DN4477_c0_g1_i1.path2	Pepsico1_Contig928.path1	novel.2632
TRINITY_DN75067_c0_g1_i1.path1	Pepsico2_Contig8571.path1	TRINITY_DN10990_c0_g2_i1.path1	novel.5224	TRINITY_DN87582_c0_g1_i1.path1
TRINITY_DN27592_c0_g1_i1.path1	TRINITY_DN101747_c0_g1_i1.path2	TRINITY_DN24494_c0_g2_i1.path2	novel.4527	TRINITY_DN76177_c0_g1_i1.path1
TRINITY_DN10802_c0_g1_i1.path1	TRINITY_DN108805_c0_g1_i1.path1	novel.240	TRINITY_DN10559_c0_g1_i12.path1	TRINITY_DN15688_c0_g4_i1.path1
TRINITY_DN85720_c0_g1_i1.path3	TRINITY_DN7279_c0_g3_i1.path1	TRINITY_DN98076_c0_g1_i1.path1	novel.6057	TRINITY_DN20079_c0_g1_i1.path1
Pepsico2_Contig18053.path1	TRINITY_DN82127_c0_g1_i1.path2	TRINITY_DN12913_c0_g4_i1.path1	TRINITY_DN38413_c0_g1_i1.path1	TRINITY_DN103548_c0_g1_i1.path1
Pepsico2_Contig4967.path1	TRINITY_DN27525_c0_g1_i1.path2	TRINITY_DN11076_c0_g1_i1.path1	TRINITY_DN42989_c1_g1_i1.path1	novel.4983
TRINITY_DN1167_c0_g2_i1.path1	novel.5367	TRINITY_DN22560_c0_g1_i4.path1	novel.7626	novel.2571
TRINITY_DN15691_c0_g1_i1.path1	novel.10386	TRINITY_DN52145_c0_g1_i1.path4	TRINITY_DN9918_c0_g2_i11.path1	novel.5188
TRINITY_DN11357_c0_g1_i1.path1	TRINITY_DN73832_c0_g1_i1.path1	TRINITY_DN5987_c0_g1_i3.path1	Pepsico1_Contig3373.path1	TRINITY_DN21683_c0_g3_i1.path1
TRINITY_DN27835_c0_g1_i1.path2	Pepsico2_Contig17058.path1	TRINITY_DN13584_c0_g1_i2.path2	Pepsico1_Contig32793.path1	novel.5445
Pepsico1_Contig638.path1	novel.679	TRINITY_DN28089_c0_g1_i1.path1	TRINITY_DN65101_c0_g2_i1.path2	TRINITY_DN27011_c0_g1_i1.path1
TRINITY_DN7319_c0_g3_i1.path2	novel.5924	novel.7374	novel.9973	TRINITY_DN1440_c1_g1_i1.path2
TRINITY_DN20124_c1_g1_i1.path3	TRINITY_DN15334_c0_g1_i2.path2	TRINITY_DN106523_c0_g1_i1.path1	TRINITY_DN47515_c0_g1_i2.path1	TRINITY_DN47472_c0_g1_i1.path1
TRINITY_DN9438_c1_g1_i1.path1	novel.9844	TRINITY_DN2184_c0_g2_i1.path1	TRINITY_DN36505_c0_g1_i3.path1	TRINITY_DN28465_c0_g2_i1.path1
TRINITY_DN22054_c0_g1_i4.path1	TRINITY_DN21332_c0_g2_i2.path2	novel.1353	Pepsico2_Contig15428.path1	TRINITY_DN9454_c0_g1_i8.path1
novel.1368	novel.1834	novel.8831	novel.5032	novel.9400
TRINITY_DN8826_c1_g1_i1.path1	TRINITY_DN22741_c0_g2_i2.path1	TRINITY_DN115544_c0_g1_i1.path1	TRINITY_DN12163_c0_g1_i4.path1	TRINITY_DN53177_c0_g1_i3.path2
Pepsico2_Contig11428.path1	novel.9387	TRINITY_DN19159_c0_g1_i1.path1	TRINITY_DN36559_c0_g1_i1.path2	TRINITY_DN90969_c0_g1_i1.path1
novel.4798	TRINITY_DN3677_c0_g1_i9.path1	novel.5863	TRINITY_DN77068_c0_g1_i1.path2	TRINITY_DN38817_c0_g1_i1.path1
TRINITY_DN4532_c0_g1_i4.path2	TRINITY_DN5010_c0_g1_i1.path1	TRINITY_DN10891_c0_g2_i1.path2	TRINITY_DN26262_c0_g1_i1.path2	TRINITY_DN40240_c0_g1_i1.path3
TRINITY_DN74622_c0_g1_i1.path1	TRINITY_DN582_c2_g1_i6.path1	Pepsico1_Contig4706.path1	Pepsico2_Contig7514.path1	TRINITY_DN26745_c0_g1_i2.path1
novel.5972	Pepsico2_Contig16023.path1	novel.3560	novel.229	TRINITY_DN9586_c0_g1_i1.path1
TRINITY_DN14036_c1_g1_i3.path2	TRINITY_DN87640_c0_g1_i1.path2	TRINITY_DN105715_c0_g1_i1.path1	TRINITY_DN19159_c0_g3_i2.path1	Pepsico1_Contig37669.path1
Pepsico1_Contig886.path1	TRINITY_DN15688_c0_g4_i1.path1	novel.5980	Pepsico1_Contig36060.path1	TRINITY_DN37699_c0_g1_i5.path1
novel.3123	Pepsico2_Contig1862.path1	novel.2948	novel.8875	TRINITY_DN9300_c0_g1_i5.path2
novel.10321	TRINITY_DN71427_c0_g1_i1.path1	TRINITY_DN11729_c0_g2_i5.path1	TRINITY_DN14093_c0_g1_i3.path1	novel.2403
novel.3667	Pepsico2_Contig2458.path1	novel.4130	novel.1537	novel.6164
Pepsico2_Contig5229.path2	TRINITY_DN70066_c0_g1_i1.path1	novel.1376	novel.8619	novel.1368
TRINITY_DN3797_c0_g1_i2.path1	TRINITY_DN25639_c0_g1_i1.path1	novel.6634	TRINITY_DN95901_c0_g1_i1.path3	TRINITY_DN109386_c0_g1_i1.path1
Pepsico2_Contig3621.path2	TRINITY_DN30719_c0_g1_i1.path2	TRINITY_DN38572_c0_g1_i2.path1	Pepsico2_Contig4522.path1	novel.10028
TRINITY_DN81613_c0_g1_i1.path1	TRINITY_DN25572_c0_g1_i1.path1	Pepsico1_Contig32360.path1	novel.4459	TRINITY_DN20282_c0_g1_i3.path1
TRINITY_DN29283_c0_g1_i1.path2	TRINITY_DN4252_c0_g3_i1.path2	TRINITY_DN3294_c1_g1_i1.path1	TRINITY_DN28959_c0_g1_i1.path1	TRINITY_DN9271_c0_g1_i1.path1
TRINITY_DN26399_c0_g1_i2.path1	TRINITY_DN19042_c0_g1_i1.path1	TRINITY_DN46441_c0_g1_i1.path1	TRINITY_DN65101_c0_g1_i1.path1	TRINITY_DN8916_c0_g2_i1.path1
TRINITY_DN29201_c0_g1_i5.path1	TRINITY_DN108350_c0_g1_i1.path1	Pepsico2_Contig9383.path2	Pepsico2_Contig2036.path2	TRINITY_DN8151_c0_g1_i1.path1
novel.10230	Pepsico2_Contig12299.path2	TRINITY_DN37171_c0_g1_i1.path1	novel.7770	novel.2577
TRINITY_DN17806_c0_g3_i1.path1	novel.9871	TRINITY_DN88632_c0_g1_i1.path1	TRINITY_DN79890_c0_g1_i1.path2	novel.9695
TRINITY_DN15371_c0_g1_i6.path3	Pepsico2_Contig1676.path1	TRINITY_DN7202_c0_g1_i2.path2	novel.7374	TRINITY_DN10664_c1_g6_i1.path2
novel.65	novel.5407	TRINITY_DN20124_c1_g1_i1.path3	TRINITY_DN9657_c0_g1_i1.path1	TRINITY_DN25843_c0_g1_i1.path1
TRINITY_DN53045_c0_g1_i2.path1	Pepsico1_Contig27806.path1	TRINITY_DN14890_c0_g3_i1.path3	Pepsico1_Contig2738.path1	novel.4130
TRINITY_DN43371_c0_g1_i2.path1	TRINITY_DN62824_c0_g1_i1.path2	novel.9649	novel.2808	TRINITY_DN11834_c0_g1_i4.path1
TRINITY_DN13217_c0_g1_i1.path3	TRINITY_DN22358_c0_g1_i2.path1	novel.1260	novel.1770	TRINITY_DN71417_c0_g1_i1.path1
TRINITY_DN41898_c0_g1_i1.path2	TRINITY_DN8392_c0_g1_i2.path1	TRINITY_DN79457_c0_g1_i1.path1	novel.10246	TRINITY_DN61543_c0_g1_i1.path1
TRINITY_DN50771_c0_g1_i1.path1	TRINITY_DN15065_c0_g3_i1.path1	Pepsico2_Contig7913.path1	novel.7547	TRINITY_DN76340_c0_g1_i1.path1
Pepsico2_Contig2197.path2	novel.9394	TRINITY_DN24835_c0_g4_i1.path1	TRINITY_DN113040_c0_g1_i1.path1	TRINITY_DN12358_c0_g1_i1.path1
novel.67	novel.5929	TRINITY_DN21432_c0_g2_i1.path1	TRINITY_DN30783_c0_g1_i6.path1	TRINITY_DN64120_c0_g1_i1.path1
novel.3230	Pepsico1_Contig7444.path1	TRINITY_DN25530_c0_g1_i1.path1	TRINITY_DN49704_c0_g1_i1.path1	TRINITY_DN13544_c0_g1_i2.path1
Pepsico2_Contig14733.path1	TRINITY_DN34544_c0_g1_i2.path1	novel.2957	TRINITY_DN14351_c0_g1_i2.path1	TRINITY_DN19361_c1_g1_i1.path1
TRINITY_DN108334_c0_g1_i1.path1	TRINITY_DN17793_c0_g3_i2.path2	Pepsico2_Contig14019.path1	Pepsico1_Contig112.path1	TRINITY_DN10288_c0_g1_i1.path2
TRINITY_DN5087_c0_g1_i4.path1	TRINITY_DN21916_c0_g1_i1.path1	TRINITY_DN22580_c0_g1_i1.path1	Pepsico2_Contig1491.path1	TRINITY_DN24551_c0_g1_i1.path1
novel.7755	novel.10495	TRINITY_DN30795_c0_g1_i1.path1	novel.3721	TRINITY_DN27677_c0_g1_i2.path1
TRINITY_DN37195_c1_g1_i1.path2	TRINITY_DN17319_c0_g1_i7.path1	TRINITY_DN34931_c0_g2_i1.path1	TRINITY_DN60211_c0_g1_i1.path1	TRINITY_DN43018_c0_g2_i1.path1
TRINITY_DN70567_c0_g1_i1.path1	TRINITY_DN6722_c0_g1_i1.path1	TRINITY_DN9718_c0_g1_i1.path1	novel.8592	TRINITY_DN9268_c1_g2_i1.path1
TRINITY_DN29582_c0_g6_i1.path1	Pepsico2_Contig3832.path2	TRINITY_DN22822_c0_g1_i2.path2	TRINITY_DN15667_c0_g2_i1.path1	novel.602
TRINITY_DN8137_c0_g1_i1.path1	Pepsico2_Contig17563.path1	TRINITY_DN59933_c0_g1_i1.path1	TRINITY_DN33580_c0_g1_i1.path2	TRINITY_DN49970_c0_g1_i1.path1
TRINITY_DN18356_c0_g1_i1.path1	TRINITY_DN15449_c0_g1_i1.path1	novel.5947	TRINITY_DN39169_c0_g1_i1.path1	TRINITY_DN22580_c0_g1_i1.path1
TRINITY_DN12589_c0_g1_i2.path2	TRINITY_DN92719_c0_g1_i1.path1	novel.5683	TRINITY_DN39623_c0_g1_i1.path3	TRINITY_DN22267_c0_g2_i1.path1
novel.1038	TRINITY_DN1917_c0_g1_i1.path2	TRINITY_DN101886_c0_g1_i1.path1	TRINITY_DN9814_c1_g1_i2.path2	TRINITY_DN37782_c0_g2_i1.path1
TRINITY_DN19029_c0_g1_i1.path1	novel.8463	TRINITY_DN25978_c0_g3_i1.path2	novel.6140	novel.9241
Pepsico2_Contig583.path2	TRINITY_DN72_c1_g1_i2.path1	TRINITY_DN20497_c0_g1_i1.path4	novel.6330	TRINITY_DN15569_c0_g1_i1.path1
TRINITY_DN27841_c0_g1_i1.path1	TRINITY_DN18736_c0_g5_i1.path2	TRINITY_DN4217_c0_g1_i2.path2	novel.10321	TRINITY_DN95901_c0_g1_i1.path3
TRINITY_DN18269_c0_g1_i4.path1	TRINITY_DN25471_c0_g1_i4.path1	TRINITY_DN4491_c1_g1_i6.path1	novel.8487	TRINITY_DN9065_c0_g1_i1.path2
novel.3878	Pepsico2_Contig3722.path1	Pepsico2_Contig12767.path1	TRINITY_DN48958_c0_g1_i2.path2	TRINITY_DN18442_c1_g1_i2.path2
TRINITY_DN101293_c0_g1_i1.path1	Pepsico2_Contig12144.path1	TRINITY_DN53995_c0_g1_i1.path1	TRINITY_DN60499_c0_g1_i1.path1	TRINITY_DN73046_c0_g1_i1.path1
TRINITY_DN10324_c0_g1_i2.path1	novel.5032	TRINITY_DN29405_c0_g1_i1.path1	Pepsico1_Contig5951.path2	novel.208
TRINITY_DN59441_c0_g1_i2.path1	novel.8131	novel.185	novel.1372	TRINITY_DN34863_c0_g1_i2.path1
TRINITY_DN52025_c0_g2_i1.path2	TRINITY_DN5904_c0_g1_i3.path1	Pepsico2_Contig13770.path2	TRINITY_DN39981_c0_g1_i2.path2	TRINITY_DN26243_c0_g2_i2.path1
novel.4252	Pepsico1_Contig3075.path2	TRINITY_DN69493_c0_g1_i1.path1	TRINITY_DN11834_c0_g1_i4.path1	TRINITY_DN8794_c0_g2_i3.path1
TRINITY_DN18688_c0_g3_i2.path1	novel.6515	TRINITY_DN21541_c0_g3_i2.path2	TRINITY_DN110435_c0_g1_i1.path1	novel.8682
TRINITY_DN9136_c1_g3_i1.path1	Pepsico2_Contig16793.path1	TRINITY_DN44802_c0_g1_i1.path1	TRINITY_DN65228_c0_g1_i1.path1	novel.7080
TRINITY_DN22392_c1_g1_i3.path1	Pepsico2_Contig17169.path1	TRINITY_DN18258_c0_g1_i1.path1	novel.7295	TRINITY_DN76723_c0_g1_i1.path2
TRINITY_DN9390_c0_g1_i1.path1	TRINITY_DN25287_c0_g2_i1.path1	novel.8654	TRINITY_DN18700_c0_g2_i1.path1	novel.8833
novel.8315	TRINITY_DN10700_c0_g2_i1.path1	TRINITY_DN14351_c0_g1_i2.path1	TRINITY_DN11376_c0_g1_i5.path1	novel.7884
TRINITY_DN13881_c0_g2_i8.path1	TRINITY_DN10665_c0_g1_i2.path1	TRINITY_DN10337_c0_g1_i8.path1	TRINITY_DN49782_c0_g1_i1.path1	TRINITY_DN100341_c0_g1_i1.path2
TRINITY_DN14129_c0_g1_i5.path1	novel.6651	novel.7779	Pepsico2_Contig3536.path1	Pepsico2_Contig7754.path1
Pepsico2_Contig20286.path1	novel.1356	novel.3709	TRINITY_DN86093_c0_g1_i1.path1	novel.9712
Pepsico1_Contig855.path1	TRINITY_DN1827_c0_g2_i1.path1	Pepsico1_Contig37830.path1	novel.8833	novel.10186
novel.1356	novel.2980	novel.2208	novel.286	novel.4266
TRINITY_DN56945_c0_g1_i1.path1	novel.7639	novel.1940	novel.3259	TRINITY_DN45179_c0_g1_i3.path2
TRINITY_DN12808_c0_g1_i3.path1	novel.2969	TRINITY_DN4050_c1_g1_i10.path1	novel.4129	TRINITY_DN30719_c0_g1_i1.path3
novel.7295	TRINITY_DN16507_c0_g1_i2.path1	TRINITY_DN13586_c3_g1_i2.path1	novel.7082	TRINITY_DN44459_c0_g1_i1.path1
TRINITY_DN71605_c0_g1_i1.path1	TRINITY_DN6115_c1_g1_i2.path2	TRINITY_DN27290_c0_g1_i1.path1	TRINITY_DN279_c2_g1_i1.path1	TRINITY_DN36978_c0_g1_i1.path1
TRINITY_DN16758_c0_g1_i1.path1	TRINITY_DN70814_c0_g1_i1.path1	TRINITY_DN3707_c0_g1_i10.path2	Pepsico1_Contig32400.path1	TRINITY_DN1502_c0_g4_i1.path1
TRINITY_DN56627_c0_g3_i3.path1	Pepsico2_Contig302.path2	novel.9786	TRINITY_DN5721_c0_g1_i1.path1	novel.5824
TRINITY_DN80213_c0_g1_i1.path1	TRINITY_DN12207_c0_g1_i1.path1	TRINITY_DN60125_c0_g1_i1.path1	novel.2561	TRINITY_DN15691_c0_g1_i1.path1
TRINITY_DN99345_c0_g1_i1.path2	Pepsico2_Contig12326.path2	TRINITY_DN99122_c0_g1_i1.path1	novel.5006	TRINITY_DN4683_c1_g1_i1.path2
novel.1287	TRINITY_DN105250_c0_g1_i1.path3	TRINITY_DN9065_c0_g1_i1.path2	novel.9029	novel.3834
TRINITY_DN12475_c1_g2_i5.path2	TRINITY_DN6293_c0_g1_i1.path1	TRINITY_DN35530_c0_g1_i1.path1	novel.4277	TRINITY_DN15383_c0_g1_i1.path1
novel.5944	TRINITY_DN899_c0_g1_i5.path1	TRINITY_DN11731_c0_g3_i1.path1	TRINITY_DN54627_c0_g1_i1.path1	TRINITY_DN115596_c0_g1_i1.path1
TRINITY_DN10059_c0_g2_i4.path1	TRINITY_DN17812_c0_g1_i4.path1	novel.363	Pepsico2_Contig8093.path2	novel.1101
Pepsico2_Contig9154.path1	TRINITY_DN21473_c0_g1_i1.path1	TRINITY_DN25826_c0_g2_i1.path1	TRINITY_DN83655_c0_g1_i1.path1	TRINITY_DN20875_c0_g1_i1.path2
TRINITY_DN51929_c0_g1_i1.path1	TRINITY_DN9943_c1_g1_i1.path1	Pepsico2_Contig14792.path2	TRINITY_DN9835_c0_g1_i10.path3	TRINITY_DN48169_c1_g1_i1.path1
TRINITY_DN23705_c0_g2_i2.path1	TRINITY_DN4076_c0_g1_i5.path1	TRINITY_DN69173_c0_g1_i1.path1	TRINITY_DN4027_c0_g5_i1.path3	TRINITY_DN22462_c0_g1_i1.path1
TRINITY_DN13542_c0_g1_i1.path2	novel.7767	TRINITY_DN32750_c1_g4_i1.path1	TRINITY_DN1092_c1_g1_i1.path2	TRINITY_DN2548_c2_g1_i1.path3
TRINITY_DN21483_c0_g1_i1.path1	TRINITY_DN12193_c0_g2_i1.path2	TRINITY_DN51163_c0_g2_i1.path2	TRINITY_DN92652_c0_g1_i1.path3	Pepsico2_Contig2259.path2
Pepsico1_Contig3839.path1	Pepsico2_Contig12625.path1	novel.23	TRINITY_DN2098_c0_g2_i1.path1	novel.1099
TRINITY_DN22792_c0_g2_i1.path1	TRINITY_DN69173_c0_g1_i1.path1	TRINITY_DN32770_c2_g1_i1.path1	TRINITY_DN43457_c0_g1_i1.path1	novel.8614
TRINITY_DN18924_c0_g1_i1.path1	novel.7779	novel.9707	TRINITY_DN32251_c0_g1_i1.path1	Pepsico2_Contig19170.path1
novel.7912	TRINITY_DN25461_c0_g1_i1.path2	TRINITY_DN1671_c1_g1_i1.path1	TRINITY_DN44459_c0_g1_i1.path1	TRINITY_DN48223_c0_g1_i1.path1
novel.1390	novel.8899	novel.4018	TRINITY_DN28511_c1_g2_i1.path1	TRINITY_DN40665_c0_g2_i1.path1
TRINITY_DN9412_c0_g2_i1.path1	TRINITY_DN4488_c1_g1_i2.path1	Pepsico1_Contig29617.path1	novel.7176	TRINITY_DN200_c0_g1_i2.path1
novel.3232	novel.263	novel.395	TRINITY_DN53177_c0_g1_i3.path2	novel.2142
novel.4468	Pepsico1_Contig2899.path1	novel.1729	novel.8953	TRINITY_DN10337_c0_g1_i8.path1
novel.5032	TRINITY_DN10324_c0_g1_i2.path1	TRINITY_DN8037_c0_g1_i3.path2	TRINITY_DN47192_c0_g1_i1.path1	novel.6361
TRINITY_DN40354_c0_g3_i1.path1	novel.8953	novel.1757	TRINITY_DN27067_c1_g1_i1.path1	TRINITY_DN8973_c0_g2_i2.path1
TRINITY_DN8542_c1_g1_i1.path2	Pepsico2_Contig19669.path2	TRINITY_DN23067_c0_g1_i1.path1	TRINITY_DN30795_c0_g1_i1.path1	novel.755
TRINITY_DN37150_c0_g1_i1.path1	novel.2676	novel.4797	novel.4189	Pepsico2_Contig12952.path2
Pepsico2_Contig9102.path1	TRINITY_DN33116_c0_g1_i1.path1	TRINITY_DN39335_c0_g1_i1.path2	novel.826	novel.6134
novel.68	TRINITY_DN7875_c1_g1_i1.path1	TRINITY_DN12712_c0_g1_i4.path1	Pepsico2_Contig19932.path1	TRINITY_DN15039_c0_g1_i2.path2
TRINITY_DN16237_c0_g1_i1.path1	TRINITY_DN14607_c0_g1_i1.path1	Pepsico2_Contig301.path1	novel.3352	TRINITY_DN23178_c0_g1_i1.path1
TRINITY_DN10750_c0_g1_i2.path1	novel.1229	TRINITY_DN21074_c0_g1_i1.path1	Pepsico2_Contig21062.path2	TRINITY_DN475_c0_g1_i14.path1
novel.5769	TRINITY_DN1019_c0_g2_i1.path2	Pepsico2_Contig9071.path1	novel.2288	Pepsico1_Contig2398.path2
TRINITY_DN56086_c0_g2_i1.path1	novel.3659	TRINITY_DN27388_c0_g3_i3.path1	TRINITY_DN103140_c0_g1_i1.path2	TRINITY_DN11265_c0_g1_i9.path1
TRINITY_DN65115_c0_g1_i1.path1	TRINITY_DN22937_c0_g1_i3.path1	novel.6441	TRINITY_DN20282_c0_g1_i3.path1	Pepsico1_Contig1605.path1
TRINITY_DN79772_c0_g1_i1.path1	TRINITY_DN11729_c0_g2_i5.path1	TRINITY_DN25186_c0_g1_i1.path2	novel.8327	novel.2626
TRINITY_DN48186_c0_g1_i1.path1	novel.9395	novel.1101	TRINITY_DN65444_c0_g1_i1.path1	novel.4780
Pepsico2_Contig20820.path2	novel.5681	TRINITY_DN37246_c0_g1_i1.path1	novel.1892	TRINITY_DN102817_c0_g1_i1.path1
TRINITY_DN46046_c0_g2_i1.path1	TRINITY_DN80213_c0_g1_i1.path1	TRINITY_DN25572_c0_g1_i1.path2	novel.1123	TRINITY_DN22497_c1_g2_i1.path1
TRINITY_DN5358_c3_g1_i1.path1	Pepsico2_Contig2197.path2	novel.1766	TRINITY_DN85794_c0_g1_i1.path1	novel.4323
TRINITY_DN13035_c0_g1_i13.path1	TRINITY_DN9250_c0_g2_i2.path2	TRINITY_DN22392_c1_g1_i3.path1	TRINITY_DN60652_c0_g1_i1.path1	TRINITY_DN34473_c0_g1_i1.path2
Pepsico1_Contig2161.path2	novel.8448	TRINITY_DN8670_c1_g1_i8.path2	TRINITY_DN24482_c0_g1_i3.path1	novel.6151
novel.3217	novel.2972	novel.6458	TRINITY_DN10835_c0_g1_i2.path1	TRINITY_DN10323_c0_g1_i5.path1
novel.5390	Pepsico2_Contig971.path1	TRINITY_DN11234_c0_g1_i2.path1	novel.1368	TRINITY_DN15032_c0_g2_i4.path1
novel.6653	novel.6649	Pepsico2_Contig18257.path1	novel.3981	novel.589
TRINITY_DN14002_c0_g1_i6.path1	TRINITY_DN85720_c0_g1_i1.path3	TRINITY_DN21179_c0_g1_i1.path1	novel.7703	Pepsico2_Contig11265.path1
novel.66	novel.7147	TRINITY_DN10559_c0_g1_i12.path1	TRINITY_DN15735_c0_g4_i1.path1	TRINITY_DN32245_c0_g3_i1.path2
Pepsico2_Contig15659.path2	novel.9532	TRINITY_DN28950_c0_g1_i1.path1	TRINITY_DN46245_c0_g1_i1.path2	TRINITY_DN20073_c0_g1_i1.path1
TRINITY_DN2019_c0_g1_i1.path1	Pepsico2_Contig2004.path2	TRINITY_DN7335_c0_g1_i7.path1	TRINITY_DN89267_c0_g1_i1.path1	TRINITY_DN4595_c0_g3_i1.path2
Pepsico2_Contig2312.path1	TRINITY_DN38499_c0_g2_i1.path1	TRINITY_DN36050_c0_g2_i2.path1	novel.8299	TRINITY_DN9964_c0_g1_i10.path2
TRINITY_DN55121_c0_g1_i1.path1	TRINITY_DN277_c2_g1_i1.path3	TRINITY_DN38216_c0_g1_i1.path1	novel.7029	TRINITY_DN99345_c0_g1_i1.path2
Pepsico1_Contig6449.path1	TRINITY_DN1968_c0_g1_i4.path2	novel.3232	novel.2216	TRINITY_DN19042_c0_g1_i1.path1
TRINITY_DN1502_c0_g4_i1.path1	Pepsico1_Contig13494.path2	TRINITY_DN32584_c0_g1_i1.path1	Pepsico2_Contig19863.path1	TRINITY_DN70311_c0_g1_i1.path1
TRINITY_DN87_c0_g1_i1.path2	TRINITY_DN97596_c0_g1_i2.path1	TRINITY_DN13734_c0_g2_i1.path1	Pepsico2_Contig2002.path1	TRINITY_DN28950_c0_g1_i1.path1
TRINITY_DN18638_c0_g1_i1.path1	TRINITY_DN20627_c0_g1_i1.path1	novel.1777	TRINITY_DN20136_c1_g1_i1.path3	TRINITY_DN5439_c0_g1_i1.path1
Pepsico1_Contig2271.path1	novel.10187	TRINITY_DN8900_c0_g1_i6.path1	TRINITY_DN249_c1_g1_i1.path1	TRINITY_DN109230_c0_g1_i1.path1
TRINITY_DN106297_c0_g1_i1.path1	TRINITY_DN78930_c0_g1_i1.path1	TRINITY_DN44901_c0_g2_i1.path1	Pepsico2_Contig20220.path1	novel.4468
TRINITY_DN3843_c0_g1_i1.path1	TRINITY_DN410_c2_g1_i8.path2	TRINITY_DN24796_c1_g2_i1.path3	Pepsico1_Contig4979.path1	TRINITY_DN51917_c0_g1_i1.path2
TRINITY_DN19915_c1_g1_i1.path1	TRINITY_DN4139_c0_g2_i1.path1	TRINITY_DN29788_c0_g2_i1.path1	TRINITY_DN32602_c0_g1_i1.path2	novel.2853
novel.4424	novel.8749	TRINITY_DN40362_c0_g1_i1.path1	TRINITY_DN40672_c0_g1_i1.path2	novel.8207
TRINITY_DN95125_c0_g1_i1.path1	TRINITY_DN1167_c0_g2_i1.path1	TRINITY_DN38190_c0_g1_i1.path2	TRINITY_DN14667_c0_g2_i5.path2	Pepsico2_Contig19712.path2
TRINITY_DN899_c0_g1_i5.path1	novel.7991	novel.10212	Pepsico2_Contig12997.path1	TRINITY_DN5817_c1_g1_i1.path1
novel.10101	TRINITY_DN10343_c0_g2_i4.path1	novel.9021	novel.9674	TRINITY_DN23414_c1_g1_i3.path1
TRINITY_DN11741_c1_g1_i2.path1	TRINITY_DN112475_c0_g1_i1.path1	TRINITY_DN15688_c0_g4_i1.path1	TRINITY_DN14330_c0_g1_i1.path1	TRINITY_DN18545_c0_g2_i1.path1
TRINITY_DN46859_c0_g1_i1.path1	TRINITY_DN40112_c0_g1_i1.path1	TRINITY_DN22391_c0_g1_i2.path1	TRINITY_DN12758_c1_g2_i1.path2	novel.7111
TRINITY_DN4540_c0_g2_i1.path1	TRINITY_DN17708_c1_g2_i1.path2	novel.10321	novel.8207	novel.4797
TRINITY_DN12381_c0_g1_i1.path1	novel.7962	Pepsico1_Contig725.path2	Pepsico2_Contig15585.path1	Pepsico1_Contig33505.path1
Pepsico1_Contig7174.path1	TRINITY_DN22129_c0_g4_i1.path2	Pepsico2_Contig13875.path1	TRINITY_DN4488_c1_g1_i2.path1	TRINITY_DN20125_c0_g1_i6.path1
TRINITY_DN34343_c0_g1_i1.path1	TRINITY_DN80506_c0_g1_i1.path1	Pepsico2_Contig10688.path1	TRINITY_DN50550_c0_g1_i1.path2	TRINITY_DN31143_c0_g1_i14.path1
TRINITY_DN11075_c0_g1_i6.path1	TRINITY_DN83655_c0_g1_i1.path1	Pepsico2_Contig15246.path1	TRINITY_DN91049_c0_g1_i1.path2	novel.7755
TRINITY_DN2098_c0_g2_i1.path1	TRINITY_DN19704_c0_g3_i1.path1	TRINITY_DN5568_c2_g2_i1.path1	novel.4797	TRINITY_DN50371_c0_g1_i1.path1
Pepsico1_Contig37664.path1	novel.857	TRINITY_DN5752_c0_g1_i1.path1	TRINITY_DN45363_c0_g1_i1.path2	novel.8675
TRINITY_DN7279_c0_g3_i1.path1	Pepsico2_Contig1180.path1	TRINITY_DN24596_c0_g1_i1.path1	novel.2224	TRINITY_DN15183_c0_g1_i1.path2
novel.920	novel.185	TRINITY_DN19230_c1_g1_i1.path1	novel.1291	novel.4870
TRINITY_DN13745_c0_g1_i7.path1	novel.108	TRINITY_DN102464_c0_g1_i1.path2	TRINITY_DN98069_c0_g1_i1.path1	novel.35
TRINITY_DN31490_c0_g2_i1.path1	TRINITY_DN2850_c0_g3_i1.path1	TRINITY_DN7190_c0_g3_i1.path1	TRINITY_DN12808_c0_g1_i3.path1	TRINITY_DN45898_c0_g1_i3.path3
TRINITY_DN2743_c0_g1_i31.path1	TRINITY_DN43323_c0_g4_i1.path1	TRINITY_DN21900_c0_g1_i2.path1	Pepsico1_Contig847.path1	TRINITY_DN45916_c0_g1_i1.path1
Pepsico2_Contig6846.path1	novel.7107	novel.1001	novel.2116	TRINITY_DN53146_c0_g1_i2.path1
TRINITY_DN10288_c0_g1_i1.path2	TRINITY_DN21615_c0_g1_i2.path1	TRINITY_DN43953_c0_g2_i1.path1	TRINITY_DN12960_c0_g1_i2.path1	TRINITY_DN65059_c0_g1_i1.path2
TRINITY_DN12593_c1_g1_i1.path1	TRINITY_DN1258_c0_g8_i1.path2	TRINITY_DN24779_c0_g1_i1.path1	TRINITY_DN16238_c0_g1_i5.path1	novel.8749
TRINITY_DN22433_c0_g1_i1.path1	TRINITY_DN98076_c0_g1_i1.path1	Pepsico2_Contig20430.path1	novel.5700	Pepsico1_Contig826.path1
Pepsico2_Contig12126.path2	TRINITY_DN24932_c0_g1_i1.path1	novel.3218	novel.5929	novel.7466
TRINITY_DN46441_c0_g1_i1.path1	novel.4319	novel.8200	novel.8552	TRINITY_DN34261_c0_g1_i1.path1
novel.679	TRINITY_DN36731_c0_g1_i1.path1	Pepsico2_Contig6148.path1	Pepsico1_Contig1252.path1	TRINITY_DN24796_c1_g2_i1.path3
TRINITY_DN2756_c0_g1_i2.path1	Pepsico2_Contig10317.path1	novel.5944	TRINITY_DN19177_c0_g1_i1.path2	novel.2944
novel.3173	novel.9370	TRINITY_DN47666_c0_g2_i3.path1	TRINITY_DN88218_c0_g1_i2.path1	TRINITY_DN88746_c0_g1_i1.path1
TRINITY_DN588_c0_g2_i1.path1	Pepsico1_Contig37664.path1	Pepsico1_Contig4800.path2	novel.919	novel.7289
TRINITY_DN18481_c0_g1_i2.path1	TRINITY_DN21483_c0_g1_i1.path1	TRINITY_DN104426_c0_g1_i1.path1	Pepsico2_Contig7576.path3	TRINITY_DN38459_c0_g1_i1.path1
novel.9865	Pepsico1_Contig5216.path1	TRINITY_DN37635_c0_g1_i1.path2	TRINITY_DN20381_c0_g1_i4.path1	TRINITY_DN13092_c0_g1_i4.path1
TRINITY_DN4076_c0_g1_i5.path1	novel.7539	TRINITY_DN19410_c0_g1_i1.path1	TRINITY_DN41312_c0_g1_i1.path1	novel.1110
Pepsico2_Contig20050.path2	TRINITY_DN24832_c0_g3_i1.path1	novel.5979	TRINITY_DN22497_c1_g2_i1.path1	novel.3543
TRINITY_DN28104_c0_g1_i2.path1	novel.924	TRINITY_DN5904_c0_g1_i3.path1	TRINITY_DN47085_c0_g1_i1.path1	TRINITY_DN38451_c0_g1_i8.path1
novel.4826	TRINITY_DN6544_c0_g2_i1.path1	TRINITY_DN60460_c0_g1_i1.path2	TRINITY_DN59339_c0_g1_i2.path2	novel.4033
TRINITY_DN6497_c0_g1_i2.path1	TRINITY_DN52809_c0_g2_i1.path1	novel.8923	TRINITY_DN11203_c0_g1_i1.path1	Pepsico1_Contig31861.path1
TRINITY_DN14351_c0_g1_i2.path1	novel.6039	TRINITY_DN44353_c0_g1_i1.path1	TRINITY_DN65604_c0_g1_i1.path1	Pepsico1_Contig2227.path2
novel.1777	TRINITY_DN16654_c0_g1_i2.path2	TRINITY_DN19468_c0_g2_i2.path1	TRINITY_DN26421_c0_g1_i4.path1	TRINITY_DN16357_c0_g3_i1.path1
TRINITY_DN16257_c1_g1_i5.path2	TRINITY_DN43845_c0_g1_i13.path1	TRINITY_DN14991_c1_g1_i1.path1	TRINITY_DN10241_c0_g2_i1.path1	TRINITY_DN26343_c0_g2_i1.path2
TRINITY_DN5678_c0_g1_i1.path5	Pepsico2_Contig7773.path2	novel.780	Pepsico1_Contig1632.path1	TRINITY_DN18688_c0_g3_i2.path1
novel.51	TRINITY_DN6841_c0_g1_i2.path1	TRINITY_DN73748_c0_g1_i1.path1	novel.2647	novel.4774
Pepsico2_Contig14412.path3	TRINITY_DN42661_c0_g1_i1.path3	novel.10289	TRINITY_DN16231_c0_g1_i2.path2	TRINITY_DN5542_c0_g3_i1.path1
Pepsico1_Contig1373.path1	TRINITY_DN92905_c0_g1_i1.path2	TRINITY_DN2354_c0_g1_i4.path2	TRINITY_DN30069_c0_g2_i1.path1	TRINITY_DN12387_c0_g1_i1.path1
novel.6441	TRINITY_DN17531_c1_g1_i4.path1	TRINITY_DN83655_c0_g1_i1.path1	TRINITY_DN84674_c0_g1_i1.path1	TRINITY_DN73349_c0_g1_i1.path1
TRINITY_DN8151_c0_g1_i1.path1	TRINITY_DN54033_c0_g2_i2.path1	novel.8829	TRINITY_DN86956_c0_g1_i1.path1	novel.9732
TRINITY_DN5609_c0_g1_i1.path2	Pepsico1_Contig6443.path2	TRINITY_DN37635_c0_g1_i1.path4	TRINITY_DN15272_c1_g1_i1.path2	TRINITY_DN4252_c0_g3_i1.path2
TRINITY_DN79969_c0_g1_i1.path2	TRINITY_DN12443_c0_g2_i1.path1	Pepsico2_Contig8782.path3	TRINITY_DN1440_c1_g1_i1.path2	TRINITY_DN48958_c0_g1_i2.path1
TRINITY_DN82127_c0_g1_i1.path2	TRINITY_DN15838_c0_g1_i1.path1	novel.4033	TRINITY_DN38190_c0_g1_i1.path2	novel.5635
TRINITY_DN22560_c0_g1_i4.path1	TRINITY_DN16062_c0_g1_i1.path1	TRINITY_DN36488_c0_g2_i1.path1	TRINITY_DN12193_c0_g2_i1.path1	Pepsico2_Contig5219.path1
TRINITY_DN25978_c0_g3_i1.path2	TRINITY_DN5568_c2_g2_i1.path1	TRINITY_DN13826_c0_g1_i3.path1	novel.9948	TRINITY_DN65444_c0_g1_i1.path1
Pepsico2_Contig3671.path2	TRINITY_DN34205_c0_g1_i1.path3	novel.2490	novel.4382	novel.1490
TRINITY_DN34473_c0_g1_i1.path3	novel.7303	TRINITY_DN10644_c0_g2_i6.path2	TRINITY_DN12927_c0_g2_i1.path1	novel.2306
TRINITY_DN50492_c0_g2_i1.path2	Pepsico2_Contig20820.path2	TRINITY_DN48406_c0_g3_i1.path2	Pepsico2_Contig17130.path1	TRINITY_DN5641_c0_g1_i5.path3
TRINITY_DN51436_c0_g1_i1.path2	novel.5667	TRINITY_DN60842_c0_g3_i3.path1	TRINITY_DN51436_c0_g1_i1.path2	novel.8805
TRINITY_DN56964_c0_g1_i1.path1	TRINITY_DN14443_c0_g2_i4.path1	Pepsico2_Contig8285.path1	Pepsico2_Contig19479.path1	TRINITY_DN102396_c0_g1_i1.path1
TRINITY_DN2526_c0_g1_i8.path2	novel.7047	TRINITY_DN22453_c1_g3_i1.path2	TRINITY_DN35417_c0_g1_i3.path2	TRINITY_DN249_c1_g1_i1.path1
TRINITY_DN7311_c0_g1_i1.path1	TRINITY_DN28089_c0_g1_i1.path1	TRINITY_DN5821_c0_g1_i8.path2	TRINITY_DN13663_c1_g1_i1.path1	TRINITY_DN56459_c0_g1_i1.path1
novel.1381	TRINITY_DN2554_c0_g1_i11.path1	Pepsico2_Contig5930.path1	novel.1662	TRINITY_DN78930_c0_g1_i1.path1
TRINITY_DN12086_c0_g2_i2.path1	novel.3399	TRINITY_DN10676_c0_g1_i1.path2	TRINITY_DN4783_c0_g2_i1.path1	TRINITY_DN8820_c0_g1_i1.path1
Pepsico1_Contig1620.path2	TRINITY_DN12086_c0_g2_i2.path1	novel.589	novel.8470	TRINITY_DN6938_c0_g4_i1.path1
TRINITY_DN3299_c0_g1_i18.path1	TRINITY_DN112522_c0_g1_i1.path1	novel.6205	TRINITY_DN11075_c0_g1_i6.path1	TRINITY_DN15806_c0_g2_i1.path2
TRINITY_DN44560_c0_g2_i1.path2	TRINITY_DN39203_c0_g1_i1.path1	novel.9609	novel.6134	TRINITY_DN33313_c0_g2_i2.path1
novel.4668	novel.82	TRINITY_DN92821_c0_g1_i1.path1	Pepsico1_Contig31806.path1	TRINITY_DN10835_c0_g1_i2.path1
TRINITY_DN76151_c0_g1_i1.path1	TRINITY_DN8318_c0_g1_i3.path3	TRINITY_DN26642_c0_g1_i3.path1	TRINITY_DN13035_c0_g1_i13.path1	TRINITY_DN13241_c0_g3_i1.path1
TRINITY_DN63138_c0_g1_i1.path2	TRINITY_DN9569_c0_g1_i3.path3	TRINITY_DN10059_c0_g2_i4.path1	Pepsico2_Contig1633.path2	TRINITY_DN7472_c0_g1_i1.path1
TRINITY_DN111601_c0_g1_i1.path2	TRINITY_DN21900_c0_g1_i2.path1	TRINITY_DN6356_c0_g6_i1.path4	novel.6593	TRINITY_DN27253_c0_g1_i1.path2
TRINITY_DN11234_c0_g1_i2.path1	novel.3232	TRINITY_DN22267_c0_g2_i1.path1	novel.9732	TRINITY_DN14356_c1_g1_i10.path2
novel.89	TRINITY_DN18011_c0_g1_i4.path1	TRINITY_DN15123_c0_g1_i4.path1	novel.950	Pepsico1_Contig37664.path1
novel.10099	Pepsico1_Contig36309.path1	TRINITY_DN18908_c0_g1_i7.path1	TRINITY_DN9384_c0_g1_i3.path1	TRINITY_DN8963_c0_g1_i5.path2
novel.7613	TRINITY_DN36977_c1_g1_i1.path1	TRINITY_DN109527_c0_g1_i1.path1	TRINITY_DN15919_c0_g1_i1.path1	Pepsico2_Contig16795.path2
TRINITY_DN4849_c0_g2_i1.path1	TRINITY_DN10891_c2_g1_i1.path1	TRINITY_DN83257_c0_g1_i1.path1	TRINITY_DN40362_c0_g1_i1.path1	novel.947
Pepsico1_Contig628.path1	Pepsico2_Contig1496.path1	novel.6339	Pepsico1_Contig15124.path2	TRINITY_DN48538_c0_g1_i1.path2
TRINITY_DN10178_c0_g3_i2.path1	Pepsico1_Contig97.path1	novel.7755	TRINITY_DN4785_c0_g1_i7.path2	Pepsico1_Contig880.path1
novel.6977	Pepsico1_Contig47.path1	TRINITY_DN30055_c0_g1_i1.path1	TRINITY_DN13940_c0_g1_i1.path1	TRINITY_DN215_c0_g4_i1.path3
novel.7858	TRINITY_DN2854_c0_g1_i1.path1	TRINITY_DN14330_c0_g1_i1.path1	TRINITY_DN111423_c0_g1_i1.path1	TRINITY_DN22831_c0_g1_i2.path1
Pepsico2_Contig14140.path1	TRINITY_DN10891_c0_g2_i1.path2	TRINITY_DN82127_c0_g1_i1.path2	Pepsico1_Contig636.path1	novel.4851
novel.10335	novel.9865	novel.6215	TRINITY_DN6494_c0_g1_i1.path1	novel.7857
TRINITY_DN28514_c0_g1_i2.path1	TRINITY_DN35789_c0_g1_i1.path2	novel.52	Pepsico1_Contig36870.path1	TRINITY_DN88632_c0_g1_i1.path1
novel.2368	TRINITY_DN28276_c0_g2_i1.path1	novel.5071	TRINITY_DN24069_c0_g1_i1.path1	TRINITY_DN65886_c0_g1_i1.path1
TRINITY_DN1961_c0_g1_i7.path1	TRINITY_DN18185_c0_g1_i6.path1	TRINITY_DN21106_c0_g1_i1.path3	TRINITY_DN54876_c0_g1_i1.path1	TRINITY_DN80176_c0_g1_i1.path1
novel.1343	TRINITY_DN19159_c0_g4_i1.path1	TRINITY_DN6703_c2_g1_i1.path1	TRINITY_DN46441_c0_g1_i1.path1	TRINITY_DN10654_c0_g3_i2.path1
TRINITY_DN32798_c1_g1_i2.path2	novel.7755	Pepsico2_Contig20765.path1	novel.3776	TRINITY_DN8916_c1_g3_i1.path1
novel.8466	Pepsico1_Contig1860.path1	Pepsico1_Contig473.path1	TRINITY_DN13745_c0_g1_i7.path1	Pepsico2_Contig5038.path1
TRINITY_DN21185_c0_g1_i1.path2	novel.5525	TRINITY_DN3591_c0_g1_i2.path1	novel.5445	Pepsico1_Contig28824.path2
TRINITY_DN78568_c0_g1_i1.path1	TRINITY_DN19960_c0_g1_i4.path1	novel.3201	TRINITY_DN6155_c0_g1_i2.path2	TRINITY_DN35009_c0_g1_i2.path1
TRINITY_DN61640_c0_g1_i1.path1	TRINITY_DN50099_c0_g1_i1.path3	TRINITY_DN2548_c2_g1_i1.path3	TRINITY_DN26581_c0_g1_i1.path1	TRINITY_DN84679_c0_g1_i1.path1
TRINITY_DN27062_c0_g1_i1.path1	TRINITY_DN20899_c0_g1_i1.path1	TRINITY_DN17834_c0_g1_i1.path1	TRINITY_DN29549_c0_g1_i2.path1	TRINITY_DN100959_c0_g1_i1.path2
TRINITY_DN92719_c0_g1_i1.path1	TRINITY_DN9835_c0_g1_i10.path3	TRINITY_DN24644_c0_g2_i1.path1	novel.4266	TRINITY_DN44450_c0_g1_i2.path1
TRINITY_DN11147_c2_g1_i1.path1	novel.3934	TRINITY_DN12108_c0_g2_i1.path1	TRINITY_DN20497_c0_g1_i1.path4	Pepsico2_Contig15246.path1
TRINITY_DN2548_c2_g1_i1.path3	Pepsico2_Contig19497.path1	TRINITY_DN21167_c0_g2_i1.path1	TRINITY_DN10089_c0_g1_i4.path1	TRINITY_DN39013_c0_g1_i1.path1
Pepsico2_Contig19596.path1	TRINITY_DN39409_c4_g1_i1.path1	TRINITY_DN27525_c0_g1_i1.path2	TRINITY_DN13998_c0_g2_i1.path1	TRINITY_DN17834_c0_g2_i1.path1
TRINITY_DN94018_c0_g1_i1.path1	Pepsico1_Contig24063.path2	TRINITY_DN8318_c0_g1_i3.path3	TRINITY_DN17844_c2_g1_i1.path1	TRINITY_DN1734_c1_g1_i1.path1
TRINITY_DN20073_c0_g1_i1.path1	novel.8465	novel.2581	TRINITY_DN1240_c0_g2_i1.path2	TRINITY_DN11167_c2_g1_i1.path2
novel.9712	TRINITY_DN23496_c0_g1_i2.path2	novel.1103	novel.679	TRINITY_DN36727_c1_g1_i1.path1
Pepsico2_Contig3750.path1	TRINITY_DN52537_c0_g1_i1.path1	novel.203	novel.7962	TRINITY_DN34811_c0_g1_i1.path1
TRINITY_DN5621_c0_g2_i1.path1	TRINITY_DN2440_c0_g1_i1.path1	TRINITY_DN52648_c0_g1_i2.path1	TRINITY_DN101710_c0_g1_i1.path1	Pepsico1_Contig7444.path1
Pepsico2_Contig13792.path1	TRINITY_DN17687_c0_g1_i1.path1	Pepsico2_Contig15817.path1	TRINITY_DN5730_c0_g2_i2.path1	TRINITY_DN98199_c0_g1_i1.path1
TRINITY_DN49471_c0_g1_i1.path1	Pepsico2_Contig2978.path1	TRINITY_DN2562_c0_g1_i13.path1	TRINITY_DN2414_c1_g1_i3.path1	TRINITY_DN34274_c0_g1_i1.path1
novel.6222	TRINITY_DN5220_c0_g1_i1.path1	novel.4789	TRINITY_DN19029_c0_g1_i1.path1	TRINITY_DN26540_c0_g1_i1.path1
Pepsico2_Contig10427.path1	TRINITY_DN26453_c0_g2_i5.path2	TRINITY_DN53906_c0_g1_i1.path2	TRINITY_DN26074_c0_g1_i1.path1	TRINITY_DN110324_c0_g1_i1.path1
novel.9370	novel.7327	novel.7462	TRINITY_DN10783_c0_g3_i1.path1	TRINITY_DN101710_c0_g1_i1.path1
TRINITY_DN7092_c0_g1_i1.path2	TRINITY_DN103622_c0_g1_i1.path1	TRINITY_DN12358_c0_g1_i1.path1	TRINITY_DN25978_c0_g3_i1.path2	TRINITY_DN114453_c0_g1_i1.path1
novel.5367	TRINITY_DN96412_c0_g1_i1.path1	TRINITY_DN57202_c0_g1_i1.path2	TRINITY_DN31249_c1_g3_i1.path1	TRINITY_DN37907_c0_g1_i1.path1
Pepsico2_Contig3010.path1	TRINITY_DN22476_c0_g1_i1.path1	TRINITY_DN25998_c0_g1_i2.path2	TRINITY_DN79890_c0_g1_i1.path1	TRINITY_DN4027_c5_g1_i1.path3
TRINITY_DN53472_c0_g1_i1.path1	TRINITY_DN5014_c0_g4_i1.path1	TRINITY_DN20295_c0_g1_i3.path1	TRINITY_DN102445_c0_g1_i1.path1	Pepsico1_Contig340.path1
TRINITY_DN50099_c0_g1_i1.path3	Pepsico1_Contig4766.path1	TRINITY_DN14526_c0_g1_i3.path1	novel.6051	Pepsico1_Contig3839.path1
TRINITY_DN17793_c0_g3_i2.path1	Pepsico2_Contig19932.path1	novel.7107	novel.1834	TRINITY_DN36056_c0_g1_i1.path1
TRINITY_DN14475_c0_g2_i3.path1	Pepsico2_Contig17130.path1	TRINITY_DN9384_c0_g1_i3.path1	TRINITY_DN33572_c0_g2_i1.path2	TRINITY_DN16511_c0_g1_i6.path1
TRINITY_DN11265_c0_g1_i9.path1	novel.7701	TRINITY_DN69304_c0_g1_i1.path1	TRINITY_DN24832_c0_g3_i1.path4	novel.7796
TRINITY_DN10806_c1_g3_i2.path1	Pepsico2_Contig1696.path1	TRINITY_DN28341_c3_g1_i1.path1	novel.8942	TRINITY_DN89230_c0_g1_i1.path1
novel.3934	Pepsico2_Contig13814.path1	TRINITY_DN20994_c0_g1_i1.path2	TRINITY_DN10241_c1_g3_i1.path1	TRINITY_DN69132_c0_g1_i1.path1
novel.7137	TRINITY_DN25100_c0_g2_i2.path1	Pepsico2_Contig12255.path1	TRINITY_DN64736_c0_g1_i1.path2	novel.349
TRINITY_DN12505_c0_g2_i1.path1	TRINITY_DN21421_c0_g1_i1.path2	novel.8908	TRINITY_DN81600_c0_g1_i1.path1	novel.7062
TRINITY_DN90744_c0_g1_i1.path1	TRINITY_DN61636_c0_g1_i1.path1	TRINITY_DN29528_c0_g1_i1.path1	TRINITY_DN98103_c0_g1_i1.path1	TRINITY_DN59954_c0_g1_i3.path1
TRINITY_DN12767_c0_g1_i2.path1	TRINITY_DN13899_c0_g1_i7.path1	TRINITY_DN15272_c1_g1_i1.path1	TRINITY_DN47488_c0_g2_i1.path1	TRINITY_DN15065_c0_g2_i1.path1
TRINITY_DN12913_c0_g2_i1.path1	TRINITY_DN78624_c0_g1_i1.path1	TRINITY_DN43018_c0_g1_i1.path1	novel.360	novel.5419
TRINITY_DN31249_c1_g3_i1.path1	TRINITY_DN46441_c0_g1_i1.path1	TRINITY_DN111283_c0_g1_i1.path1	TRINITY_DN25471_c0_g1_i4.path1	TRINITY_DN113106_c0_g1_i1.path1
TRINITY_DN108805_c0_g1_i1.path1	TRINITY_DN16391_c0_g1_i1.path1	novel.4761	TRINITY_DN4683_c1_g1_i1.path2	TRINITY_DN91955_c0_g1_i1.path3
TRINITY_DN7687_c0_g1_i2.path1	novel.2701	TRINITY_DN38261_c0_g1_i1.path1	TRINITY_DN12397_c0_g2_i1.path2	novel.7107
TRINITY_DN73832_c0_g1_i1.path1	TRINITY_DN24412_c0_g1_i5.path1	TRINITY_DN8893_c0_g2_i1.path1	TRINITY_DN53472_c0_g1_i1.path1	Pepsico2_Contig3536.path1
TRINITY_DN4288_c0_g1_i3.path1	TRINITY_DN60462_c0_g1_i1.path1	TRINITY_DN17829_c0_g1_i1.path2	TRINITY_DN89078_c0_g1_i1.path1	TRINITY_DN32297_c0_g1_i2.path1
TRINITY_DN16113_c0_g1_i1.path1	Pepsico2_Contig2197.path1	TRINITY_DN7328_c3_g1_i1.path3	TRINITY_DN29568_c0_g1_i1.path2	TRINITY_DN115544_c0_g1_i1.path1
TRINITY_DN7072_c5_g1_i2.path1	novel.1940	novel.9702	TRINITY_DN9887_c0_g3_i1.path1	TRINITY_DN38413_c0_g1_i1.path1
Pepsico2_Contig5514.path1	TRINITY_DN12126_c0_g1_i1.path2	novel.8749	TRINITY_DN44802_c0_g1_i1.path1	TRINITY_DN5306_c1_g1_i1.path1
TRINITY_DN78428_c0_g1_i1.path1	TRINITY_DN3174_c1_g1_i2.path1	novel.6460	TRINITY_DN8794_c0_g2_i3.path1	TRINITY_DN111597_c0_g1_i1.path1
TRINITY_DN92905_c0_g1_i1.path2	novel.9897	TRINITY_DN31290_c1_g1_i1.path1	novel.1666	novel.7345
novel.7792	TRINITY_DN18814_c0_g2_i1.path2	novel.2539	TRINITY_DN21900_c0_g1_i2.path1	novel.7029
novel.395	TRINITY_DN79340_c0_g1_i1.path1	TRINITY_DN28494_c0_g1_i1.path1	TRINITY_DN28069_c0_g2_i1.path2	TRINITY_DN42759_c0_g1_i4.path3
TRINITY_DN91955_c0_g1_i1.path3	novel.2208	TRINITY_DN46656_c0_g1_i1.path1	TRINITY_DN30929_c0_g1_i2.path1	TRINITY_DN65161_c0_g1_i1.path1
TRINITY_DN115019_c0_g1_i1.path3	novel.2547	Pepsico2_Contig11020.path3	novel.6405	TRINITY_DN12264_c0_g1_i2.path1
TRINITY_DN113859_c0_g1_i1.path2	TRINITY_DN16333_c0_g1_i1.path1	TRINITY_DN31069_c0_g1_i1.path3	TRINITY_DN71598_c0_g1_i1.path1	novel.7132
TRINITY_DN38725_c0_g3_i1.path1	TRINITY_DN3559_c0_g2_i1.path1	novel.6927	TRINITY_DN6676_c0_g1_i1.path2	TRINITY_DN29051_c0_g1_i1.path2
TRINITY_DN26083_c0_g1_i3.path1	TRINITY_DN7475_c1_g1_i1.path3	TRINITY_DN45283_c0_g1_i1.path2	TRINITY_DN112261_c0_g1_i1.path1	TRINITY_DN19508_c1_g1_i1.path2
Pepsico1_Contig35521.path1	TRINITY_DN10451_c0_g1_i2.path2	novel.7858	Pepsico1_Contig17431.path2	novel.2740
Pepsico2_Contig19460.path2	TRINITY_DN7472_c0_g1_i1.path1	TRINITY_DN54033_c0_g2_i2.path1	TRINITY_DN26560_c0_g3_i2.path1	novel.10531
novel.4813	Pepsico1_Contig4097.path1	TRINITY_DN23092_c2_g1_i1.path1	TRINITY_DN40521_c0_g1_i2.path1	TRINITY_DN197_c2_g2_i1.path1
Pepsico1_Contig8039.path1	novel.8923	Pepsico2_Contig7594.path1	novel.9021	TRINITY_DN12904_c0_g1_i11.path1
TRINITY_DN91407_c0_g1_i1.path1	novel.4130	Pepsico2_Contig4927.path2	Pepsico2_Contig14559.path1	TRINITY_DN32609_c0_g1_i2.path2
Pepsico2_Contig9973.path1	TRINITY_DN30795_c0_g1_i1.path1	TRINITY_DN215_c0_g4_i1.path3	Pepsico1_Contig517.path2	TRINITY_DN9367_c0_g1_i1.path1
TRINITY_DN2365_c0_g1_i15.path2	Pepsico1_Contig1404.path1	TRINITY_DN98936_c0_g1_i1.path1	Pepsico2_Contig11016.path1	Pepsico2_Contig12767.path1
TRINITY_DN74032_c0_g1_i1.path2	TRINITY_DN5937_c0_g1_i5.path1	Pepsico2_Contig643.path2	TRINITY_DN38499_c0_g2_i1.path1	Pepsico2_Contig19106.path1
TRINITY_DN4488_c1_g1_i2.path1	novel.8661	TRINITY_DN7194_c0_g1_i17.path1	TRINITY_DN7934_c2_g5_i1.path1	TRINITY_DN7319_c0_g4_i2.path2
TRINITY_DN112308_c0_g1_i1.path1	TRINITY_DN2377_c0_g1_i1.path1	TRINITY_DN72284_c0_g1_i1.path2	TRINITY_DN61504_c0_g1_i1.path1	TRINITY_DN9659_c0_g2_i1.path1
TRINITY_DN10891_c2_g1_i1.path1	TRINITY_DN11147_c0_g2_i1.path1	Pepsico2_Contig18100.path1	TRINITY_DN53146_c0_g1_i2.path1	TRINITY_DN36321_c0_g1_i1.path1
TRINITY_DN22691_c0_g1_i3.path1	novel.719	Pepsico2_Contig17959.path1	Pepsico1_Contig66.path2	TRINITY_DN52148_c0_g1_i2.path1
TRINITY_DN46951_c0_g1_i1.path1	Pepsico2_Contig14792.path2	novel.1347	TRINITY_DN18442_c1_g1_i2.path2	TRINITY_DN11455_c0_g1_i2.path1
TRINITY_DN104618_c0_g1_i1.path1	Pepsico2_Contig13792.path1	TRINITY_DN4640_c0_g1_i2.path1	TRINITY_DN71079_c0_g1_i1.path1	TRINITY_DN10164_c0_g1_i10.path1
TRINITY_DN302_c0_g1_i4.path1	TRINITY_DN109902_c0_g1_i1.path1	TRINITY_DN13663_c1_g1_i1.path1	TRINITY_DN5821_c0_g1_i8.path2	TRINITY_DN626_c0_g3_i1.path2
novel.3330	TRINITY_DN91049_c0_g1_i1.path2	novel.10090	novel.7441	TRINITY_DN15185_c0_g1_i1.path1
Pepsico1_Contig28824.path2	TRINITY_DN34931_c0_g2_i1.path1	TRINITY_DN32743_c0_g1_i1.path2	novel.10546	novel.5478
TRINITY_DN487_c0_g2_i7.path1	TRINITY_DN53045_c0_g1_i2.path1	TRINITY_DN69780_c0_g1_i1.path1	novel.3394	TRINITY_DN11167_c1_g1_i1.path2
TRINITY_DN61305_c0_g1_i1.path1	TRINITY_DN21432_c0_g2_i1.path1	Pepsico2_Contig10500.path4	TRINITY_DN54316_c0_g1_i1.path1	novel.8995
novel.3223	novel.6222	Pepsico2_Contig2528.path1	TRINITY_DN22992_c0_g1_i1.path1	Pepsico1_Contig1404.path1
TRINITY_DN40151_c0_g2_i3.path2	TRINITY_DN26577_c0_g1_i1.path1	TRINITY_DN931_c0_g2_i2.path1	TRINITY_DN18034_c0_g1_i1.path1	Pepsico1_Contig36870.path1
TRINITY_DN7934_c2_g3_i1.path1	novel.639	TRINITY_DN3677_c0_g1_i9.path1	novel.912	TRINITY_DN15334_c0_g1_i2.path2
novel.9926	TRINITY_DN26611_c0_g2_i1.path1	TRINITY_DN89601_c0_g1_i1.path2	novel.9388	novel.10135
TRINITY_DN31325_c0_g1_i2.path2	Pepsico2_Contig3196.path2	TRINITY_DN14093_c0_g1_i3.path1	TRINITY_DN19042_c0_g1_i1.path1	novel.7125
TRINITY_DN25621_c0_g2_i1.path1	TRINITY_DN8916_c1_g3_i1.path1	TRINITY_DN32798_c1_g1_i2.path2	TRINITY_DN30055_c0_g1_i1.path1	TRINITY_DN5678_c0_g1_i1.path5
TRINITY_DN27607_c0_g1_i10.path1	TRINITY_DN19410_c0_g1_i1.path1	novel.5773	novel.6039	Pepsico1_Contig3414.path1
Pepsico2_Contig337.path1	Pepsico2_Contig18009.path1	Pepsico2_Contig302.path2	novel.7796	TRINITY_DN32319_c0_g1_i1.path1
novel.9871	Pepsico2_Contig301.path1	TRINITY_DN63288_c0_g1_i1.path2	novel.7483	TRINITY_DN48197_c0_g1_i1.path1
TRINITY_DN11729_c0_g2_i5.path1	Pepsico2_Contig13451.path1	novel.1243	TRINITY_DN6497_c0_g1_i2.path1	TRINITY_DN14132_c0_g2_i2.path1
TRINITY_DN20079_c0_g1_i1.path1	novel.4566	TRINITY_DN10752_c0_g1_i1.path1	TRINITY_DN69173_c0_g1_i1.path1	TRINITY_DN24837_c0_g1_i2.path1
novel.7029	TRINITY_DN21044_c2_g1_i1.path3	TRINITY_DN26240_c0_g1_i1.path2	novel.1438	TRINITY_DN7475_c1_g1_i1.path3
TRINITY_DN10133_c0_g1_i1.path1	TRINITY_DN10873_c0_g2_i1.path1	TRINITY_DN12126_c0_g1_i1.path2	Pepsico1_Contig4159.path2	TRINITY_DN57712_c0_g1_i1.path1
novel.134	TRINITY_DN111088_c0_g1_i1.path1	novel.63	TRINITY_DN95555_c0_g1_i1.path1	TRINITY_DN1671_c1_g1_i1.path1
Pepsico2_Contig859.path2	novel.10619	Pepsico2_Contig19478.path1	TRINITY_DN48902_c0_g1_i1.path2	Pepsico2_Contig11037.path2
TRINITY_DN19855_c0_g2_i1.path1	novel.6907	TRINITY_DN9964_c0_g1_i10.path2	TRINITY_DN2337_c0_g1_i6.path2	novel.6458
Pepsico2_Contig10308.path1	TRINITY_DN7205_c0_g1_i1.path3	TRINITY_DN4463_c0_g1_i6.path1	TRINITY_DN12475_c1_g2_i5.path2	Pepsico2_Contig5745.path1
TRINITY_DN17687_c0_g1_i1.path1	TRINITY_DN16609_c0_g1_i1.path1	TRINITY_DN12605_c0_g1_i7.path1	Pepsico1_Contig4939.path2	novel.7255
TRINITY_DN87033_c0_g1_i1.path1	TRINITY_DN26343_c0_g2_i1.path2	TRINITY_DN20062_c0_g1_i1.path1	TRINITY_DN24644_c0_g2_i1.path1	TRINITY_DN28762_c1_g1_i1.path1
TRINITY_DN6573_c0_g1_i4.path1	TRINITY_DN9776_c0_g1_i9.path2	TRINITY_DN82584_c0_g1_i1.path1	TRINITY_DN40695_c0_g2_i2.path2	novel.7847
TRINITY_DN30719_c0_g1_i1.path2	Pepsico2_Contig20237.path1	TRINITY_DN22433_c0_g1_i1.path1	novel.7080	TRINITY_DN19914_c0_g2_i3.path1
novel.3205	novel.2265	Pepsico2_Contig5308.path1	TRINITY_DN75958_c0_g1_i1.path1	novel.4713
TRINITY_DN13319_c0_g2_i3.path1	novel.7371	TRINITY_DN9633_c1_g1_i3.path1	TRINITY_DN65609_c0_g1_i1.path1	novel.3594
TRINITY_DN5568_c2_g2_i1.path1	TRINITY_DN12767_c0_g1_i2.path1	TRINITY_DN17961_c0_g1_i1.path1	TRINITY_DN45719_c0_g1_i1.path2	novel.2762
TRINITY_DN19933_c1_g5_i1.path1	novel.9427	TRINITY_DN5358_c3_g1_i1.path1	novel.1223	TRINITY_DN103142_c0_g1_i1.path1
TRINITY_DN14002_c2_g1_i1.path1	novel.7792	TRINITY_DN81600_c0_g1_i1.path1	TRINITY_DN29096_c0_g1_i9.path1	novel.7304
novel.2701	Pepsico2_Contig550.path1	TRINITY_DN27592_c0_g1_i1.path1	TRINITY_DN33959_c0_g1_i1.path1	TRINITY_DN104075_c0_g1_i1.path1
Pepsico1_Contig22443.path2	TRINITY_DN90744_c0_g1_i1.path1	TRINITY_DN6676_c0_g3_i1.path1	TRINITY_DN87640_c0_g1_i1.path2	novel.10544
TRINITY_DN13445_c0_g2_i1.path2	Pepsico2_Contig4411.path1	TRINITY_DN6979_c0_g1_i6.path1	Pepsico2_Contig3508.path2	Pepsico2_Contig6858.path1
TRINITY_DN110188_c0_g1_i1.path1	TRINITY_DN10657_c0_g1_i4.path1	TRINITY_DN18857_c1_g2_i1.path1	novel.1356	TRINITY_DN36129_c2_g1_i1.path1
TRINITY_DN22822_c0_g1_i2.path2	TRINITY_DN99313_c0_g1_i1.path1	TRINITY_DN14036_c1_g1_i3.path2	TRINITY_DN53906_c0_g1_i1.path2	novel.1336
TRINITY_DN45645_c0_g1_i2.path2	TRINITY_DN83524_c0_g1_i1.path1	novel.2046	TRINITY_DN31290_c1_g1_i1.path1	TRINITY_DN89601_c0_g1_i1.path2
TRINITY_DN549_c0_g1_i4.path1	Pepsico2_Contig8783.path1	TRINITY_DN56641_c0_g1_i2.path1	novel.7292	TRINITY_DN556_c0_g1_i1.path3
novel.1490	Pepsico2_Contig632.path1	TRINITY_DN15185_c0_g1_i1.path1	Pepsico2_Contig7869.path1	TRINITY_DN12_c0_g1_i1.path2
Pepsico2_Contig14542.path1	novel.4684	TRINITY_DN23201_c0_g1_i2.path1	TRINITY_DN6677_c0_g2_i2.path1	TRINITY_DN38190_c0_g1_i1.path2
TRINITY_DN42863_c0_g1_i1.path2	novel.7329	TRINITY_DN34863_c0_g1_i2.path1	TRINITY_DN11773_c0_g2_i1.path3	Pepsico2_Contig1053.path2
TRINITY_DN2554_c0_g1_i11.path1	TRINITY_DN26642_c0_g1_i3.path1	Pepsico2_Contig15929.path1	novel.719	novel.1627
TRINITY_DN23955_c0_g1_i1.path1	novel.10015	novel.9948	TRINITY_DN27104_c0_g1_i3.path1	Pepsico2_Contig20820.path2
TRINITY_DN79353_c0_g1_i1.path1	Pepsico1_Contig21216.path2	TRINITY_DN25843_c0_g1_i1.path1	Pepsico2_Contig10698.path1	novel.8942
novel.7636	TRINITY_DN5752_c0_g1_i1.path1	TRINITY_DN6115_c1_g1_i2.path2	TRINITY_DN19684_c0_g1_i6.path1	TRINITY_DN6703_c2_g1_i1.path1
novel.4217	TRINITY_DN31382_c1_g1_i1.path1	novel.9339	novel.678	TRINITY_DN40830_c1_g2_i1.path1
TRINITY_DN16742_c0_g3_i2.path1	TRINITY_DN14676_c0_g1_i1.path1	TRINITY_DN5030_c0_g1_i7.path1	Pepsico1_Contig5551.path1	novel.950
TRINITY_DN23034_c0_g1_i1.path1	TRINITY_DN82273_c0_g1_i1.path1	Pepsico2_Contig12126.path2	TRINITY_DN5893_c0_g1_i1.path1	novel.4539
TRINITY_DN34497_c1_g1_i1.path3	Pepsico2_Contig6836.path1	novel.8932	Pepsico2_Contig13901.path1	novel.9389
novel.363	TRINITY_DN10835_c0_g1_i2.path1	TRINITY_DN45363_c0_g1_i1.path2	TRINITY_DN112475_c0_g1_i1.path1	TRINITY_DN107684_c0_g1_i1.path1
novel.9376	Pepsico1_Contig2049.path1	TRINITY_DN13350_c0_g1_i1.path1	TRINITY_DN94685_c0_g1_i1.path2	TRINITY_DN40261_c0_g1_i1.path1
novel.185	novel.8654	novel.7502	Pepsico1_Contig37830.path1	TRINITY_DN34533_c0_g1_i1.path1
TRINITY_DN12163_c0_g1_i4.path1	TRINITY_DN79673_c0_g1_i1.path1	TRINITY_DN4027_c5_g1_i1.path3	TRINITY_DN85720_c0_g1_i1.path3	TRINITY_DN33191_c0_g1_i2.path1
TRINITY_DN32187_c0_g1_i1.path1	Pepsico2_Contig9973.path1	TRINITY_DN97596_c0_g1_i2.path1	TRINITY_DN34600_c0_g1_i1.path1	TRINITY_DN4431_c0_g1_i2.path2
novel.2273	TRINITY_DN13166_c1_g1_i1.path1	novel.101	TRINITY_DN22392_c1_g1_i3.path1	novel.2964
novel.366	TRINITY_DN28959_c0_g1_i1.path1	novel.3981	TRINITY_DN40240_c0_g1_i1.path3	novel.5712
TRINITY_DN82047_c0_g1_i1.path1	Pepsico2_Contig17288.path1	novel.8204	novel.3742	novel.8177
Pepsico2_Contig12237.path1	TRINITY_DN9920_c0_g1_i11.path1	TRINITY_DN24768_c0_g2_i1.path1	Pepsico1_Contig29617.path1	TRINITY_DN40665_c0_g1_i1.path1
TRINITY_DN100126_c0_g1_i1.path1	TRINITY_DN4515_c0_g1_i17.path1	TRINITY_DN26300_c0_g2_i1.path1	TRINITY_DN17373_c0_g1_i1.path1	novel.1546
TRINITY_DN9886_c0_g1_i1.path1	novel.10538	Pepsico2_Contig17563.path1	TRINITY_DN60842_c0_g3_i3.path1	TRINITY_DN22478_c0_g1_i1.path1
novel.1756	Pepsico2_Contig11418.path2	TRINITY_DN112740_c0_g1_i1.path1	TRINITY_DN64231_c0_g1_i1.path1	TRINITY_DN27835_c0_g1_i1.path2
TRINITY_DN17774_c0_g2_i1.path1	TRINITY_DN10337_c0_g1_i8.path1	novel.9865	TRINITY_DN38876_c3_g1_i1.path1	TRINITY_DN31840_c0_g1_i1.path2
TRINITY_DN10979_c0_g2_i8.path1	Pepsico1_Contig33364.path3	TRINITY_DN21365_c0_g1_i1.path1	novel.9351	TRINITY_DN90456_c0_g1_i1.path1
TRINITY_DN8548_c0_g1_i1.path1	Pepsico2_Contig7984.path2	Pepsico2_Contig12329.path1	TRINITY_DN38817_c0_g1_i1.path1	TRINITY_DN37839_c0_g2_i1.path1
Pepsico2_Contig11747.path1	Pepsico1_Contig5974.path1	Pepsico2_Contig11928.path1	Pepsico1_Contig37664.path1	TRINITY_DN29845_c1_g1_i1.path1
novel.9941	TRINITY_DN46245_c0_g1_i1.path2	novel.950	novel.2141	novel.2023
novel.729	novel.6256	TRINITY_DN1229_c0_g2_i1.path2	novel.9927	TRINITY_DN18857_c1_g2_i1.path1
novel.372	TRINITY_DN20133_c0_g1_i3.path1	TRINITY_DN18991_c0_g2_i4.path1	Pepsico1_Contig29476.path1	TRINITY_DN78660_c0_g1_i1.path1
TRINITY_DN23428_c0_g1_i1.path1	Pepsico1_Contig4627.path1	TRINITY_DN9250_c0_g2_i2.path2	TRINITY_DN8916_c1_g3_i1.path1	Pepsico2_Contig17571.path2
novel.3468	TRINITY_DN88607_c0_g1_i1.path1	TRINITY_DN24562_c0_g3_i20.path1	TRINITY_DN47472_c0_g1_i1.path1	TRINITY_DN16165_c0_g1_i1.path3
TRINITY_DN40802_c0_g2_i2.path1	Pepsico2_Contig12997.path1	TRINITY_DN34195_c0_g1_i2.path2	novel.9353	TRINITY_DN18962_c0_g1_i4.path1
TRINITY_DN53881_c0_g1_i1.path1	TRINITY_DN27525_c0_g1_i1.path1	novel.302	Pepsico1_Contig3024.path1	Pepsico2_Contig12358.path3
novel.8703	TRINITY_DN33623_c0_g1_i3.path1	TRINITY_DN10860_c0_g1_i2.path1	TRINITY_DN29051_c0_g1_i1.path2	TRINITY_DN42155_c0_g1_i1.path1
novel.4599	TRINITY_DN9975_c0_g2_i5.path1	novel.4882	TRINITY_DN101247_c0_g1_i1.path1	TRINITY_DN5122_c0_g1_i5.path1
TRINITY_DN8261_c0_g1_i2.path1	TRINITY_DN26300_c0_g2_i1.path1	TRINITY_DN48634_c0_g1_i1.path2	TRINITY_DN46656_c0_g1_i1.path1	TRINITY_DN93535_c0_g1_i1.path1
TRINITY_DN6703_c2_g1_i1.path1	novel.2855	TRINITY_DN20073_c0_g1_i1.path1	novel.3689	TRINITY_DN4885_c0_g3_i1.path1
Pepsico1_Contig4627.path1	TRINITY_DN38122_c0_g1_i1.path1	novel.1427	TRINITY_DN42664_c0_g1_i9.path1	novel.5533
Pepsico2_Contig17958.path1	TRINITY_DN78666_c0_g1_i1.path1	TRINITY_DN13745_c0_g1_i7.path1	TRINITY_DN28091_c0_g1_i1.path2	TRINITY_DN10498_c0_g1_i8.path1
TRINITY_DN44200_c0_g1_i1.path1	novel.52	Pepsico1_Contig33380.path1	Pepsico2_Contig12914.path1	TRINITY_DN16237_c0_g1_i1.path1
novel.7361	novel.68	TRINITY_DN14370_c0_g2_i1.path1	novel.2964	TRINITY_DN37315_c0_g1_i3.path1
Pepsico1_Contig37632.path2	TRINITY_DN16513_c0_g2_i1.path1	TRINITY_DN19021_c0_g2_i1.path1	Pepsico2_Contig13457.path1	novel.7103
TRINITY_DN2554_c0_g1_i11.path2	TRINITY_DN29057_c0_g1_i1.path1	TRINITY_DN16742_c0_g3_i2.path2	novel.8466	TRINITY_DN28276_c0_g2_i1.path1
novel.7488	Pepsico2_Contig11020.path3	TRINITY_DN17017_c0_g2_i3.path1	TRINITY_DN9056_c1_g1_i1.path1	TRINITY_DN50265_c0_g1_i1.path1
TRINITY_DN66650_c0_g1_i1.path1	novel.2997	TRINITY_DN48253_c2_g1_i2.path1	TRINITY_DN22433_c0_g1_i1.path1	Pepsico2_Contig1978.path1
Pepsico2_Contig4734.path1	novel.1336	TRINITY_DN39409_c4_g1_i1.path1	TRINITY_DN12108_c0_g2_i1.path1	TRINITY_DN6676_c0_g1_i1.path2
TRINITY_DN19327_c0_g1_i2.path1	TRINITY_DN32157_c1_g1_i2.path1	TRINITY_DN60072_c0_g1_i1.path1	TRINITY_DN9734_c0_g2_i1.path1	TRINITY_DN95947_c0_g1_i1.path1
Pepsico2_Contig1718.path1	TRINITY_DN14890_c0_g3_i1.path3	TRINITY_DN16238_c0_g1_i5.path1	TRINITY_DN28792_c0_g2_i1.path1	TRINITY_DN11513_c0_g1_i3.path1
TRINITY_DN10385_c0_g1_i1.path1	TRINITY_DN14240_c0_g1_i1.path2	TRINITY_DN1961_c0_g1_i7.path1	Pepsico2_Contig19415.path1	Pepsico2_Contig7984.path2
TRINITY_DN13022_c0_g1_i1.path1	TRINITY_DN18059_c1_g1_i1.path4	TRINITY_DN111088_c0_g1_i1.path1	TRINITY_DN15357_c0_g1_i1.path1	TRINITY_DN9712_c0_g2_i1.path1
Pepsico2_Contig1633.path2	TRINITY_DN4885_c0_g4_i1.path1	novel.2274	TRINITY_DN11898_c0_g1_i5.path1	novel.4813
Pepsico2_Contig4658.path1	TRINITY_DN26045_c0_g1_i4.path1	TRINITY_DN17980_c0_g1_i4.path1	TRINITY_DN4431_c0_g1_i2.path2	TRINITY_DN38411_c1_g1_i1.path1
TRINITY_DN23498_c0_g1_i1.path1	TRINITY_DN5857_c0_g1_i1.path1	TRINITY_DN4492_c0_g1_i3.path1	TRINITY_DN11190_c3_g1_i1.path2	TRINITY_DN7275_c0_g2_i2.path1
TRINITY_DN37425_c0_g1_i3.path1	TRINITY_DN99651_c0_g1_i1.path1	novel.6892	TRINITY_DN14383_c0_g1_i1.path1	novel.9583
TRINITY_DN107375_c0_g1_i1.path1	novel.7021	TRINITY_DN102263_c0_g1_i1.path1	TRINITY_DN76026_c0_g1_i1.path1	novel.6006
TRINITY_DN33163_c1_g1_i1.path1	novel.658	Pepsico1_Contig21216.path2	novel.3659	TRINITY_DN16373_c0_g1_i1.path1
novel.4397	TRINITY_DN5938_c0_g3_i1.path1	TRINITY_DN78930_c0_g1_i1.path1	Pepsico2_Contig16645.path1	novel.7336
TRINITY_DN25628_c0_g1_i1.path1	novel.5950	TRINITY_DN47515_c0_g1_i2.path1	TRINITY_DN19794_c0_g1_i1.path1	novel.9003
TRINITY_DN25843_c0_g1_i1.path1	TRINITY_DN16522_c0_g1_i3.path2	novel.1099	novel.3762	TRINITY_DN55547_c0_g1_i2.path1
TRINITY_DN11190_c3_g1_i1.path2	novel.2046	TRINITY_DN34343_c0_g1_i1.path1	TRINITY_DN17834_c0_g1_i1.path1	TRINITY_DN20381_c0_g1_i4.path1
TRINITY_DN4449_c0_g3_i2.path2	novel.4381	novel.2491	Pepsico1_Contig2462.path1	TRINITY_DN37359_c0_g3_i1.path2
novel.4051	TRINITY_DN21428_c0_g1_i3.path1	TRINITY_DN61636_c0_g1_i1.path1	TRINITY_DN16993_c1_g2_i2.path2	Pepsico2_Contig12914.path1
TRINITY_DN24482_c0_g1_i3.path1	TRINITY_DN108229_c0_g1_i1.path1	TRINITY_DN51436_c0_g1_i1.path2	TRINITY_DN38459_c0_g1_i1.path1	novel.8909
TRINITY_DN85456_c0_g1_i1.path1	novel.4517	TRINITY_DN36154_c1_g1_i1.path2	TRINITY_DN18857_c1_g2_i1.path1	novel.5813
TRINITY_DN31623_c1_g1_i1.path1	TRINITY_DN19684_c0_g1_i6.path1	Pepsico2_Contig12625.path1	novel.9390	TRINITY_DN48538_c0_g1_i1.path1
TRINITY_DN32977_c0_g1_i1.path1	novel.918	TRINITY_DN65342_c0_g1_i1.path2	novel.6167	TRINITY_DN108099_c0_g1_i1.path1
TRINITY_DN88632_c0_g1_i1.path1	TRINITY_DN81195_c0_g1_i1.path1	novel.4189	TRINITY_DN109491_c0_g1_i1.path1	TRINITY_DN20824_c0_g1_i1.path1
TRINITY_DN41267_c0_g1_i1.path1	novel.8172	novel.3918	Pepsico1_Contig7109.path2	TRINITY_DN33890_c0_g1_i3.path1
Pepsico2_Contig11020.path3	TRINITY_DN5439_c0_g1_i1.path1	novel.7304	TRINITY_DN78669_c0_g1_i1.path1	Pepsico2_Contig18542.path1
TRINITY_DN16757_c0_g1_i1.path1	Pepsico2_Contig20718.path1	TRINITY_DN17596_c0_g1_i1.path4	novel.2760	TRINITY_DN44059_c0_g1_i1.path1
novel.4995	novel.10197	novel.4424	TRINITY_DN43018_c0_g2_i1.path1	TRINITY_DN65812_c0_g1_i1.path1
novel.9314	TRINITY_DN20500_c0_g3_i1.path1	Pepsico2_Contig7773.path2	TRINITY_DN14704_c0_g1_i1.path2	Pepsico2_Contig1676.path1
novel.7738	TRINITY_DN5893_c0_g1_i1.path1	TRINITY_DN22565_c0_g2_i2.path1	Pepsico2_Contig10815.path1	Pepsico2_Contig3632.path2
novel.9180	TRINITY_DN6497_c0_g1_i2.path1	TRINITY_DN10462_c0_g1_i1.path1	novel.3947	TRINITY_DN7147_c0_g1_i3.path1
TRINITY_DN59441_c0_g1_i2.path2	novel.363	TRINITY_DN78666_c0_g1_i1.path1	novel.2642	TRINITY_DN5893_c0_g1_i1.path1
novel.1651	novel.4266	TRINITY_DN19704_c0_g3_i1.path1	TRINITY_DN28628_c0_g1_i1.path1	TRINITY_DN40106_c0_g1_i6.path2
Pepsico1_Contig39106.path1	TRINITY_DN9154_c0_g2_i1.path1	TRINITY_DN11825_c1_g3_i1.path1	TRINITY_DN22054_c0_g1_i4.path1	TRINITY_DN28628_c0_g1_i1.path1
TRINITY_DN32213_c0_g1_i1.path1	TRINITY_DN27080_c0_g4_i1.path1	TRINITY_DN80506_c0_g1_i1.path1	TRINITY_DN19306_c0_g1_i4.path1	novel.8990
novel.8808	TRINITY_DN24644_c0_g2_i1.path1	novel.7949	TRINITY_DN18237_c1_g3_i1.path1	Pepsico2_Contig14371.path1
TRINITY_DN43172_c0_g1_i1.path2	TRINITY_DN22054_c0_g1_i4.path1	novel.1566	novel.1831	Pepsico2_Contig20617.path1
novel.507	TRINITY_DN9384_c0_g1_i3.path1	TRINITY_DN11834_c0_g1_i4.path1	novel.4018	TRINITY_DN67544_c0_g1_i1.path1
novel.921	Pepsico2_Contig17370.path1	TRINITY_DN27316_c0_g1_i2.path1	TRINITY_DN32457_c0_g1_i1.path2	novel.6405
TRINITY_DN16760_c0_g1_i1.path1	TRINITY_DN15272_c1_g1_i1.path1	TRINITY_DN6494_c0_g1_i1.path1	novel.5813	TRINITY_DN88044_c0_g1_i1.path2
TRINITY_DN34104_c1_g1_i1.path2	TRINITY_DN25812_c3_g1_i1.path1	novel.8944	novel.2513	TRINITY_DN52894_c0_g1_i1.path1
TRINITY_DN22129_c0_g4_i1.path2	Pepsico1_Contig725.path2	novel.7539	TRINITY_DN27529_c0_g1_i1.path1	novel.8885
TRINITY_DN108772_c0_g1_i1.path1	novel.9255	TRINITY_DN22792_c0_g2_i1.path1	Pepsico2_Contig9000.path1	TRINITY_DN11560_c0_g1_i2.path3
TRINITY_DN16192_c0_g1_i1.path1	TRINITY_DN28246_c0_g1_i1.path2	TRINITY_DN9509_c0_g1_i4.path2	Pepsico1_Contig4467.path1	TRINITY_DN15697_c1_g1_i1.path4
TRINITY_DN92698_c0_g1_i1.path1	TRINITY_DN15919_c0_g1_i1.path1	TRINITY_DN16993_c1_g2_i2.path2	TRINITY_DN36403_c0_g4_i2.path1	TRINITY_DN6544_c0_g2_i1.path1
novel.7200	Pepsico1_Contig36152.path1	TRINITY_DN50099_c0_g1_i1.path3	novel.181	novel.2992
novel.50	TRINITY_DN15500_c0_g1_i3.path1	novel.1495	novel.5480	TRINITY_DN15693_c0_g1_i6.path2
TRINITY_DN22790_c1_g1_i1.path1	TRINITY_DN32603_c0_g1_i1.path1	Pepsico2_Contig18121.path1	novel.586	novel.796
Pepsico2_Contig15278.path1	novel.1731	TRINITY_DN23270_c0_g3_i1.path1	novel.8710	TRINITY_DN26421_c0_g1_i4.path1
novel.7114	TRINITY_DN109527_c0_g1_i1.path1	TRINITY_DN27835_c0_g1_i1.path2	TRINITY_DN21352_c0_g1_i1.path2	TRINITY_DN49472_c0_g1_i1.path2
Pepsico2_Contig280.path1	Pepsico1_Contig3100.path2	TRINITY_DN35708_c0_g1_i1.path1	Pepsico1_Contig4532.path1	novel.3414
novel.2500	TRINITY_DN24409_c0_g1_i2.path1	novel.3947	TRINITY_DN89601_c0_g1_i1.path2	TRINITY_DN53906_c0_g1_i1.path2
TRINITY_DN71148_c0_g1_i1.path1	Pepsico1_Contig32400.path1	novel.65	TRINITY_DN43845_c0_g1_i13.path1	Pepsico2_Contig11428.path1
novel.2836	TRINITY_DN106656_c0_g1_i1.path1	TRINITY_DN59836_c0_g2_i2.path3	TRINITY_DN215_c0_g4_i1.path3	Pepsico1_Contig36864.path2
TRINITY_DN3003_c0_g4_i1.path1	novel.10289	TRINITY_DN14212_c0_g1_i1.path1	TRINITY_DN21106_c0_g1_i1.path3	Pepsico2_Contig474.path1
novel.2863	TRINITY_DN8826_c1_g1_i1.path1	TRINITY_DN16612_c0_g1_i2.path1	TRINITY_DN13390_c0_g1_i1.path2	TRINITY_DN106501_c0_g1_i1.path1
novel.126	Pepsico1_Contig3373.path1	TRINITY_DN19195_c0_g1_i2.path1	TRINITY_DN26642_c0_g1_i3.path1	TRINITY_DN24125_c0_g1_i1.path1
TRINITY_DN34261_c0_g1_i1.path1	TRINITY_DN99345_c0_g1_i1.path2	Pepsico2_Contig3632.path2	novel.5669	novel.4527
TRINITY_DN43845_c0_g1_i13.path1	Pepsico2_Contig9477.path1	novel.9447	TRINITY_DN18364_c1_g1_i1.path2	novel.6828
TRINITY_DN23160_c0_g1_i2.path1	novel.9706	Pepsico1_Contig3638.path2	TRINITY_DN80419_c0_g1_i1.path1	TRINITY_DN8233_c2_g1_i1.path1
novel.1103	Pepsico2_Contig6107.path1	TRINITY_DN34713_c0_g1_i1.path1	TRINITY_DN28245_c0_g2_i1.path2	TRINITY_DN16378_c0_g1_i2.path1
novel.203	TRINITY_DN87840_c0_g1_i1.path1	novel.912	TRINITY_DN23337_c0_g1_i1.path2	Pepsico1_Contig17431.path2
Pepsico2_Contig17926.path1	TRINITY_DN59836_c0_g2_i2.path3	TRINITY_DN19578_c0_g2_i1.path1	TRINITY_DN10462_c0_g1_i1.path1	TRINITY_DN4702_c1_g1_i1.path1
novel.6256	TRINITY_DN58166_c0_g1_i1.path1	TRINITY_DN12397_c0_g2_i1.path2	novel.2969	TRINITY_DN86694_c0_g1_i1.path1
novel.1348	TRINITY_DN50734_c1_g1_i1.path1	TRINITY_DN29865_c0_g1_i1.path2	TRINITY_DN45645_c0_g1_i2.path1	novel.1376
novel.3742	novel.1490	TRINITY_DN37522_c0_g1_i1.path1	TRINITY_DN15183_c0_g1_i1.path2	TRINITY_DN10621_c0_g1_i7.path1
Pepsico2_Contig8130.path1	TRINITY_DN5942_c1_g1_i4.path1	TRINITY_DN23845_c0_g1_i1.path1	novel.6076	Pepsico2_Contig5587.path2
TRINITY_DN33116_c0_g1_i1.path1	novel.2948	TRINITY_DN6625_c0_g1_i4.path1	TRINITY_DN19350_c0_g1_i2.path1	TRINITY_DN233_c0_g2_i1.path1
Pepsico2_Contig13451.path1	Pepsico2_Contig3315.path1	novel.6659	TRINITY_DN82747_c0_g1_i1.path2	TRINITY_DN15475_c0_g1_i1.path1
TRINITY_DN3106_c0_g2_i1.path1	TRINITY_DN37171_c0_g1_i1.path1	TRINITY_DN7926_c3_g1_i1.path1	TRINITY_DN49793_c0_g1_i6.path1	novel.8875
TRINITY_DN45283_c0_g1_i1.path2	TRINITY_DN60834_c0_g1_i1.path1	TRINITY_DN94977_c0_g1_i1.path2	novel.920	TRINITY_DN74224_c0_g1_i1.path1
novel.1888	Pepsico2_Contig21062.path2	TRINITY_DN22905_c0_g1_i1.path1	TRINITY_DN5439_c0_g1_i1.path1	Pepsico2_Contig11849.path2
Pepsico2_Contig4439.path1	TRINITY_DN107723_c0_g1_i1.path1	TRINITY_DN52537_c0_g1_i1.path1	TRINITY_DN12776_c0_g1_i2.path1	TRINITY_DN5722_c0_g1_i1.path1
novel.5625	TRINITY_DN15164_c0_g1_i4.path1	Pepsico2_Contig16939.path1	novel.4453	Pepsico1_Contig29476.path1
TRINITY_DN35821_c0_g1_i2.path1	TRINITY_DN19880_c0_g1_i1.path1	TRINITY_DN2554_c0_g1_i11.path1	novel.5300	TRINITY_DN41641_c0_g1_i2.path1
TRINITY_DN21615_c0_g1_i2.path1	TRINITY_DN32653_c0_g1_i1.path1	TRINITY_DN21483_c0_g1_i1.path1	TRINITY_DN20136_c1_g1_i1.path1	TRINITY_DN56875_c0_g1_i1.path1
TRINITY_DN582_c1_g1_i4.path1	TRINITY_DN31256_c0_g1_i1.path1	Pepsico2_Contig20617.path1	Pepsico1_Contig35133.path1	TRINITY_DN13963_c1_g1_i1.path1
TRINITY_DN17531_c1_g1_i4.path2	TRINITY_DN18390_c0_g1_i1.path1	TRINITY_DN46859_c0_g1_i1.path1	TRINITY_DN23832_c0_g1_i1.path1	novel.1348
TRINITY_DN1966_c0_g1_i1.path1	TRINITY_DN38459_c0_g1_i1.path1	TRINITY_DN11360_c0_g1_i1.path1	Pepsico1_Contig32635.path1	Pepsico2_Contig8540.path2
TRINITY_DN98960_c0_g1_i1.path1	TRINITY_DN44059_c0_g1_i1.path1	TRINITY_DN88088_c0_g1_i1.path1	TRINITY_DN20616_c0_g1_i1.path1	novel.4853
TRINITY_DN19042_c0_g1_i1.path1	novel.3361	Pepsico2_Contig12308.path2	TRINITY_DN8596_c0_g6_i2.path2	TRINITY_DN25186_c0_g1_i1.path2
Pepsico1_Contig13494.path2	TRINITY_DN23566_c0_g1_i9.path1	novel.8465	TRINITY_DN74467_c0_g1_i1.path1	TRINITY_DN55364_c0_g1_i1.path1
TRINITY_DN25280_c2_g1_i1.path1	TRINITY_DN11360_c0_g1_i1.path1	TRINITY_DN50265_c0_g1_i1.path1	TRINITY_DN24192_c1_g2_i1.path1	TRINITY_DN14274_c1_g1_i7.path2
TRINITY_DN6185_c0_g1_i2.path1	novel.9369	TRINITY_DN6189_c0_g2_i2.path1	TRINITY_DN7934_c2_g5_i1.path2	novel.1554
novel.1284	TRINITY_DN14054_c0_g1_i2.path1	TRINITY_DN28712_c0_g1_i1.path1	TRINITY_DN10873_c0_g2_i1.path1	TRINITY_DN6115_c0_g2_i1.path1
novel.1172	TRINITY_DN9718_c0_g1_i1.path1	TRINITY_DN103140_c0_g1_i1.path2	TRINITY_DN38929_c0_g1_i2.path1	TRINITY_DN89105_c0_g1_i1.path1
TRINITY_DN10632_c0_g1_i6.path1	TRINITY_DN11075_c0_g1_i6.path1	TRINITY_DN19392_c2_g2_i1.path2	TRINITY_DN17793_c0_g1_i1.path1	novel.4089
TRINITY_DN11155_c0_g1_i2.path1	TRINITY_DN66852_c0_g1_i1.path1	Pepsico2_Contig12384.path1	TRINITY_DN78251_c0_g1_i1.path1	TRINITY_DN10990_c0_g2_i1.path1
Pepsico2_Contig7853.path1	TRINITY_DN14730_c0_g1_i3.path1	TRINITY_DN22638_c1_g1_i18.path1	TRINITY_DN16522_c0_g1_i3.path2	novel.4469
TRINITY_DN15262_c0_g1_i1.path1	Pepsico2_Contig12255.path1	TRINITY_DN20980_c0_g2_i1.path1	TRINITY_DN42522_c0_g1_i1.path1	TRINITY_DN102263_c0_g1_i1.path1
TRINITY_DN33568_c0_g2_i2.path2	novel.1495	novel.5866	TRINITY_DN24562_c0_g3_i20.path1	TRINITY_DN76723_c0_g1_i1.path1
TRINITY_DN4027_c4_g1_i1.path2	TRINITY_DN14036_c1_g1_i3.path2	TRINITY_DN64952_c0_g2_i1.path1	novel.185	novel.498
TRINITY_DN6909_c0_g1_i6.path1	novel.7985	Pepsico2_Contig8849.path1	TRINITY_DN7824_c0_g1_i1.path2	novel.9298
TRINITY_DN37782_c0_g2_i1.path1	TRINITY_DN31534_c0_g1_i1.path1	novel.8824	TRINITY_DN34005_c0_g1_i1.path1	TRINITY_DN32457_c0_g1_i1.path2
novel.4188	Pepsico2_Contig16242.path2	TRINITY_DN106836_c0_g1_i1.path1	novel.2865	novel.10321
Pepsico2_Contig21062.path2	TRINITY_DN10669_c0_g1_i2.path2	TRINITY_DN29862_c0_g1_i1.path2	novel.2944	TRINITY_DN49836_c0_g1_i2.path3
TRINITY_DN79263_c0_g1_i1.path1	TRINITY_DN3664_c0_g3_i1.path2	Pepsico1_Contig37664.path1	TRINITY_DN45179_c0_g1_i3.path2	Pepsico2_Contig20306.path2
TRINITY_DN8680_c0_g1_i1.path2	TRINITY_DN13200_c0_g1_i1.path2	TRINITY_DN233_c0_g2_i1.path1	novel.446	TRINITY_DN50550_c0_g1_i1.path2
TRINITY_DN11951_c0_g1_i1.path1	novel.4277	TRINITY_DN37797_c0_g2_i1.path1	TRINITY_DN17599_c0_g1_i1.path1	TRINITY_DN35464_c0_g1_i1.path1
novel.9369	TRINITY_DN23705_c0_g2_i2.path1	TRINITY_DN62021_c0_g1_i1.path1	TRINITY_DN70835_c0_g1_i1.path1	Pepsico1_Contig37533.path4
TRINITY_DN55287_c0_g1_i1.path4	novel.7646	TRINITY_DN44200_c0_g1_i1.path1	TRINITY_DN26038_c0_g6_i1.path1	novel.108
TRINITY_DN87840_c0_g1_i1.path1	TRINITY_DN15735_c0_g4_i1.path1	TRINITY_DN99992_c0_g1_i1.path5	novel.9181	Pepsico1_Contig4308.path1
TRINITY_DN10990_c0_g2_i1.path1	TRINITY_DN23034_c0_g1_i1.path1	Pepsico1_Contig19917.path1	TRINITY_DN10166_c0_g1_i1.path1	TRINITY_DN5950_c0_g3_i1.path1
TRINITY_DN1697_c0_g1_i1.path2	Pepsico2_Contig17718.path1	TRINITY_DN6563_c0_g1_i19.path2	TRINITY_DN62574_c0_g1_i1.path2	TRINITY_DN86597_c0_g1_i1.path1
novel.4760	TRINITY_DN83257_c0_g1_i1.path1	novel.9919	TRINITY_DN80060_c0_g1_i1.path3	novel.566
novel.589	Pepsico2_Contig14734.path1	TRINITY_DN72713_c0_g1_i1.path2	novel.7368	TRINITY_DN22433_c0_g1_i1.path1
TRINITY_DN43163_c0_g2_i1.path1	TRINITY_DN18958_c0_g1_i3.path1	novel.3225	Pepsico1_Contig28741.path1	TRINITY_DN17844_c2_g1_i1.path1
novel.5686	TRINITY_DN23526_c0_g1_i1.path1	TRINITY_DN25100_c0_g2_i2.path1	novel.6222	novel.2063
TRINITY_DN82304_c0_g1_i1.path1	Pepsico2_Contig2312.path1	TRINITY_DN23955_c0_g1_i1.path1	Pepsico1_Contig39171.path1	TRINITY_DN19350_c0_g2_i1.path1
TRINITY_DN44059_c0_g1_i1.path1	TRINITY_DN49471_c0_g1_i1.path1	TRINITY_DN36607_c0_g1_i1.path1	TRINITY_DN45719_c0_g1_i1.path1	TRINITY_DN96647_c0_g1_i1.path1
TRINITY_DN27406_c0_g1_i1.path1	Pepsico2_Contig10799.path1	TRINITY_DN59383_c0_g1_i1.path1	novel.7857	novel.2064
novel.7188	Pepsico2_Contig7195.path2	TRINITY_DN28606_c1_g1_i1.path1	novel.8280	novel.107
TRINITY_DN52148_c0_g1_i2.path1	novel.329	Pepsico2_Contig12819.path1	TRINITY_DN19933_c1_g5_i1.path1	TRINITY_DN32798_c1_g1_i2.path2
TRINITY_DN17309_c0_g1_i8.path2	TRINITY_DN16231_c0_g1_i2.path2	novel.6338	TRINITY_DN88203_c0_g1_i1.path1	novel.3762
TRINITY_DN106656_c0_g1_i1.path1	TRINITY_DN47675_c0_g1_i2.path1	TRINITY_DN5122_c0_g1_i5.path1	TRINITY_DN36154_c1_g1_i1.path2	novel.2123
TRINITY_DN23201_c0_g1_i2.path1	Pepsico1_Contig3866.path1	TRINITY_DN30966_c0_g1_i1.path1	Pepsico1_Contig982.path1	TRINITY_DN15712_c0_g1_i2.path1
TRINITY_DN12904_c0_g1_i11.path1	Pepsico2_Contig14078.path1	TRINITY_DN41641_c0_g1_i2.path1	novel.674	TRINITY_DN10676_c0_g1_i1.path2
TRINITY_DN26454_c0_g1_i1.path3	TRINITY_DN6865_c0_g1_i14.path1	TRINITY_DN76723_c0_g1_i1.path1	novel.918	TRINITY_DN8365_c0_g1_i7.path2
TRINITY_DN94977_c0_g1_i1.path2	TRINITY_DN14375_c0_g1_i3.path1	novel.87	TRINITY_DN26751_c0_g1_i2.path1	novel.241
TRINITY_DN38459_c0_g1_i1.path1	TRINITY_DN2414_c1_g1_i3.path1	TRINITY_DN42661_c0_g1_i1.path3	novel.9003	TRINITY_DN17319_c0_g1_i7.path1
novel.735	Pepsico2_Contig9000.path1	novel.4319	novel.2274	Pepsico1_Contig6958.path2
novel.8757	TRINITY_DN87900_c0_g1_i1.path1	TRINITY_DN17687_c0_g1_i1.path1	novel.7147	TRINITY_DN29786_c0_g1_i1.path1
novel.10140	TRINITY_DN47488_c0_g2_i1.path1	novel.1110	TRINITY_DN60460_c0_g1_i1.path2	TRINITY_DN7117_c0_g1_i2.path1
TRINITY_DN9835_c0_g1_i10.path3	Pepsico2_Contig3301.path1	novel.10244	TRINITY_DN13586_c3_g1_i2.path1	TRINITY_DN70066_c0_g1_i1.path1
novel.8953	TRINITY_DN40297_c1_g1_i1.path1	TRINITY_DN14523_c1_g4_i1.path1	TRINITY_DN14730_c0_g1_i3.path1	TRINITY_DN8945_c0_g1_i3.path1
TRINITY_DN18777_c0_g1_i1.path1	TRINITY_DN4456_c0_g2_i10.path2	Pepsico1_Contig3307.path1	TRINITY_DN2548_c2_g1_i1.path3	novel.638
TRINITY_DN39409_c4_g1_i1.path1	novel.9948	Pepsico2_Contig7020.path1	TRINITY_DN99345_c0_g1_i1.path2	TRINITY_DN28979_c0_g1_i1.path1
TRINITY_DN71427_c0_g1_i1.path1	Pepsico1_Contig473.path1	Pepsico1_Contig886.path1	TRINITY_DN70066_c0_g1_i1.path1	TRINITY_DN112261_c0_g1_i1.path1
Pepsico2_Contig4663.path1	Pepsico2_Contig21198.path2	Pepsico2_Contig2570.path3	TRINITY_DN29020_c0_g1_i2.path1	TRINITY_DN24832_c0_g3_i1.path4
novel.5947	TRINITY_DN72407_c0_g1_i1.path1	TRINITY_DN80166_c0_g1_i1.path1	novel.1510	TRINITY_DN11190_c3_g1_i1.path2
TRINITY_DN27333_c0_g1_i1.path1	novel.290	TRINITY_DN39981_c0_g1_i2.path1	TRINITY_DN5618_c0_g1_i5.path2	novel.5980
TRINITY_DN2490_c0_g2_i1.path2	Pepsico2_Contig13121.path1	Pepsico2_Contig18864.path1	TRINITY_DN63224_c0_g1_i1.path2	TRINITY_DN60072_c0_g1_i1.path1
Pepsico1_Contig1213.path1	novel.1129	novel.9053	TRINITY_DN60747_c0_g1_i1.path2	TRINITY_DN8318_c0_g1_i3.path3
Pepsico1_Contig14704.path1	TRINITY_DN37797_c0_g2_i1.path1	Pepsico1_Contig1341.path1	Pepsico2_Contig7355.path1	novel.8566
TRINITY_DN56086_c0_g1_i1.path1	novel.3517	TRINITY_DN49970_c0_g1_i1.path1	novel.6840	novel.5740
TRINITY_DN4419_c0_g1_i1.path1	TRINITY_DN5132_c0_g1_i1.path2	novel.3076	novel.7531	TRINITY_DN42370_c0_g1_i1.path1
TRINITY_DN45898_c0_g1_i3.path3	novel.2358	TRINITY_DN51216_c0_g1_i1.path1	novel.9053	TRINITY_DN17829_c0_g1_i1.path2
TRINITY_DN49782_c0_g1_i1.path1	TRINITY_DN20073_c0_g1_i1.path1	TRINITY_DN23876_c1_g2_i2.path1	TRINITY_DN10863_c0_g1_i3.path2	novel.10054
TRINITY_DN7934_c2_g5_i1.path1	TRINITY_DN35821_c0_g1_i2.path1	TRINITY_DN10835_c0_g1_i2.path1	TRINITY_DN10752_c0_g1_i1.path1	TRINITY_DN10644_c0_g2_i6.path2
[truncated: 3,136 more rows]

## Sheet: down
BY1vsDY1	BY2vsDY2	BY3vsDY3	BY4vsDY4	BY5vsDY5
Pepsico1_Contig838.path1	Pepsico1_Contig838.path1	Pepsico1_Contig838.path1	Pepsico1_Contig2161.path1	novel.7423
novel.5269	Pepsico1_Contig7260.path2	TRINITY_DN1462_c0_g4_i1.path1	novel.7423	TRINITY_DN8148_c0_g1_i1.path2
Pepsico1_Contig34345.path1	novel.5269	TRINITY_DN8148_c0_g1_i1.path2	TRINITY_DN10470_c0_g1_i2.path1	Pepsico1_Contig838.path1
Pepsico1_Contig2960.path1	Pepsico1_Contig34345.path1	Pepsico2_Contig19104.path1	Pepsico2_Contig19104.path1	TRINITY_DN69_c1_g1_i1.path4
TRINITY_DN8779_c0_g2_i3.path2	TRINITY_DN8148_c0_g1_i1.path2	Pepsico1_Contig7260.path2	TRINITY_DN393_c0_g1_i1.path1	novel.1687
TRINITY_DN10594_c0_g1_i4.path2	novel.8593	novel.5269	Pepsico2_Contig17727.path1	novel.317
novel.8452	TRINITY_DN61132_c0_g1_i1.path1	novel.317	TRINITY_DN31076_c0_g1_i4.path2	Pepsico2_Contig14668.path1
Pepsico1_Contig672.path2	Pepsico1_Contig1046.path1	TRINITY_DN3469_c0_g1_i3.path1	TRINITY_DN8148_c0_g1_i1.path2	novel.9878
novel.10175	novel.5275	TRINITY_DN10470_c0_g1_i2.path1	TRINITY_DN27339_c0_g1_i1.path1	Pepsico1_Contig4611.path1
novel.2978	novel.317	Pepsico2_Contig16992.path1	Pepsico2_Contig14932.path1	TRINITY_DN4456_c0_g2_i10.path4
novel.2520	novel.8452	Pepsico2_Contig8.path1	novel.7494	Pepsico1_Contig27196.path1
novel.5275	TRINITY_DN10470_c0_g1_i2.path1	novel.8452	Pepsico2_Contig6205.path1	Pepsico2_Contig12405.path1
novel.2531	Pepsico2_Contig3093.path2	Pepsico1_Contig34345.path1	novel.4347	novel.10567
Pepsico1_Contig2933.path1	Pepsico2_Contig11289.path2	Pepsico2_Contig17380.path1	novel.5269	TRINITY_DN1146_c0_g1_i1.path1
novel.7600	Pepsico2_Contig16992.path1	Pepsico1_Contig585.path1	novel.9878	Pepsico2_Contig3093.path2
novel.2489	novel.7924	Pepsico2_Contig13838.path2	Pepsico1_Contig883.path1	novel.9882
novel.942	novel.10567	novel.9846	Pepsico1_Contig896.path1	novel.7600
TRINITY_DN12913_c0_g1_i2.path2	Pepsico1_Contig1451.path2	novel.8361	TRINITY_DN12913_c0_g1_i2.path2	Pepsico1_Contig3350.path1
novel.10567	novel.8361	novel.8593	Pepsico2_Contig16877.path1	novel.2796
Pepsico2_Contig7831.path2	TRINITY_DN10594_c0_g1_i4.path2	novel.5604	novel.10175	TRINITY_DN10594_c0_g1_i4.path2
TRINITY_DN3478_c0_g1_i6.path1	Pepsico2_Contig16302.path1	novel.5717	Pepsico2_Contig8992.path1	TRINITY_DN4576_c0_g2_i2.path1
novel.5845	Pepsico1_Contig672.path2	novel.6752	Pepsico1_Contig34345.path1	Pepsico1_Contig8205.path2
Pepsico2_Contig3093.path2	Pepsico1_Contig7432.path3	novel.10567	Pepsico2_Contig17603.path1	novel.2520
TRINITY_DN7966_c0_g2_i3.path2	TRINITY_DN9140_c1_g1_i1.path1	Pepsico2_Contig3093.path2	TRINITY_DN46636_c0_g1_i1.path1	TRINITY_DN12913_c0_g1_i2.path2
novel.4484	novel.2520	novel.336	TRINITY_DN3469_c0_g1_i3.path1	TRINITY_DN553_c0_g2_i1.path1
Pepsico1_Contig4939.path2	Pepsico2_Contig11358.path1	novel.5147	novel.6184	TRINITY_DN1030_c0_g1_i11.path1
novel.8153	Pepsico2_Contig17380.path1	novel.2978	Pepsico2_Contig16947.path1	TRINITY_DN34205_c0_g1_i1.path1
novel.6513	novel.2978	TRINITY_DN10802_c0_g1_i1.path2	Pepsico2_Contig13659.path1	novel.2531
novel.2894	novel.2531	TRINITY_DN22363_c1_g1_i2.path1	Pepsico2_Contig17568.path1	novel.6752
novel.4425	novel.336	novel.8734	novel.1413	TRINITY_DN20837_c0_g1_i1.path2
novel.336	novel.10250	TRINITY_DN9737_c1_g3_i1.path1	Pepsico1_Contig37105.path1	Pepsico1_Contig2933.path1
TRINITY_DN9737_c1_g3_i1.path1	Pepsico1_Contig2933.path1	novel.5592	Pepsico2_Contig19239.path1	Pepsico2_Contig10871.path1
novel.265	novel.5592	Pepsico1_Contig2933.path1	Pepsico2_Contig19157.path1	Pepsico2_Contig19157.path1
novel.10554	novel.4425	novel.265	Pepsico1_Contig27196.path1	novel.1137
TRINITY_DN28718_c0_g1_i7.path2	novel.265	novel.7600	Pepsico2_Contig7831.path2	Pepsico2_Contig15327.path1
novel.9760	TRINITY_DN17816_c0_g1_i1.path2	novel.5275	Pepsico2_Contig15327.path1	Pepsico2_Contig2081.path2
novel.3162	novel.8734	novel.941	TRINITY_DN8726_c0_g1_i2.path1	TRINITY_DN14491_c0_g1_i4.path1
Pepsico1_Contig4611.path1	TRINITY_DN8639_c0_g2_i1.path5	Pepsico1_Contig185.path1	TRINITY_DN5199_c0_g2_i1.path1	novel.4725
TRINITY_DN22613_c0_g1_i2.path1	novel.7600	novel.2531	TRINITY_DN8330_c1_g3_i2.path1	novel.3162
TRINITY_DN9140_c1_g1_i1.path1	novel.6513	novel.4425	TRINITY_DN20401_c0_g2_i1.path1	novel.9760
novel.8626	TRINITY_DN3478_c0_g1_i6.path1	novel.2520	novel.656	novel.8563
novel.2779	novel.2894	TRINITY_DN9140_c1_g1_i1.path1	Pepsico2_Contig7439.path1	novel.10147
Pepsico1_Contig3350.path1	Pepsico1_Contig1034.path1	TRINITY_DN3936_c0_g1_i5.path1	novel.8257	novel.8452
Pepsico2_Contig746.path1	TRINITY_DN22504_c0_g2_i1.path1	novel.6722	TRINITY_DN69_c1_g1_i1.path4	novel.9982
TRINITY_DN4576_c0_g2_i2.path1	Pepsico2_Contig7831.path2	Pepsico2_Contig7310.path1	novel.8452	TRINITY_DN3469_c0_g1_i3.path1
novel.1137	novel.3627	novel.3627	TRINITY_DN4108_c0_g1_i5.path1	novel.10511
Pepsico2_Contig14938.path1	novel.8626	novel.1386	novel.3627	TRINITY_DN69_c1_g2_i2.path2
novel.8734	TRINITY_DN1030_c0_g1_i11.path1	TRINITY_DN3478_c0_g1_i6.path1	Pepsico2_Contig12367.path2	novel.6380
TRINITY_DN17550_c0_g1_i2.path1	novel.6752	novel.6243	Pepsico2_Contig9320.path1	novel.10110
TRINITY_DN104219_c0_g1_i1.path1	TRINITY_DN19704_c0_g1_i1.path1	TRINITY_DN4576_c0_g2_i2.path1	novel.307	Pepsico2_Contig17583.path1
Pepsico2_Contig16941.path1	Pepsico2_Contig14892.path2	TRINITY_DN19704_c0_g1_i1.path1	TRINITY_DN10802_c0_g1_i1.path2	novel.4503
novel.2389	Pepsico1_Contig16695.path1	Pepsico2_Contig8228.path1	TRINITY_DN1446_c0_g1_i1.path2	Pepsico2_Contig9798.path1
Pepsico1_Contig8011.path1	novel.4952	Pepsico2_Contig8796.path2	Pepsico1_Contig6482.path2	novel.2389
TRINITY_DN26026_c0_g1_i4.path1	novel.9760	Pepsico2_Contig15327.path1	novel.10110	novel.8532
novel.4952	novel.8459	TRINITY_DN12148_c0_g1_i2.path1	Pepsico2_Contig3212.path1	novel.336
Pepsico2_Contig11219.path2	novel.8055	novel.6513	Pepsico1_Contig1451.path2	TRINITY_DN19092_c0_g1_i1.path1
novel.2888	novel.8563	Pepsico1_Contig7129.path1	novel.1687	novel.941
Pepsico2_Contig20979.path1	Pepsico2_Contig8228.path1	Pepsico1_Contig4611.path1	novel.7728	Pepsico1_Contig1577.path1
novel.4503	TRINITY_DN8826_c1_g6_i1.path4	TRINITY_DN10594_c0_g1_i4.path2	Pepsico2_Contig204.path2	novel.2978
novel.8563	TRINITY_DN7514_c0_g1_i3.path2	Pepsico2_Contig16352.path2	TRINITY_DN16045_c1_g1_i4.path2	Pepsico1_Contig264.path1
Pepsico2_Contig16302.path1	TRINITY_DN9737_c1_g3_i1.path1	novel.9760	TRINITY_DN13467_c0_g1_i2.path2	novel.6187
TRINITY_DN23852_c0_g1_i1.path1	TRINITY_DN8779_c0_g2_i3.path2	Pepsico1_Contig836.path1	TRINITY_DN65750_c0_g1_i1.path2	Pepsico1_Contig4160.path2
novel.616	novel.6855	Pepsico2_Contig4727.path1	Pepsico2_Contig7310.path1	novel.6513
TRINITY_DN80711_c0_g1_i1.path3	TRINITY_DN4576_c0_g2_i2.path1	novel.5961	novel.9982	novel.7311
novel.1114	novel.2779	Pepsico2_Contig16302.path1	TRINITY_DN5258_c0_g1_i20.path1	novel.3781
novel.3781	TRINITY_DN12148_c0_g1_i2.path1	TRINITY_DN4719_c0_g1_i3.path2	TRINITY_DN5865_c0_g2_i1.path1	novel.8459
novel.4471	novel.3162	novel.1927	Pepsico1_Contig4611.path1	novel.9585
TRINITY_DN22177_c0_g1_i5.path1	novel.941	novel.7863	Pepsico1_Contig7129.path1	novel.2026
novel.1530	TRINITY_DN28718_c0_g1_i7.path2	TRINITY_DN12952_c0_g5_i1.path2	Pepsico1_Contig165.path1	novel.7888
novel.2527	TRINITY_DN7966_c0_g2_i3.path2	Pepsico2_Contig2387.path1	novel.10250	Pepsico2_Contig19544.path1
TRINITY_DN869_c0_g1_i1.path2	novel.8914	novel.2894	Pepsico2_Contig426.path2	novel.10148
novel.8568	Pepsico1_Contig2960.path1	novel.1530	Pepsico1_Contig1127.path1	novel.4425
novel.3530	TRINITY_DN17550_c0_g1_i2.path1	novel.6380	TRINITY_DN3541_c0_g1_i4.path2	TRINITY_DN14386_c0_g1_i3.path1
TRINITY_DN7333_c1_g1_i4.path1	Pepsico2_Contig20979.path1	novel.8914	Pepsico2_Contig4818.path1	novel.9913
novel.6382	TRINITY_DN12960_c0_g1_i2.path2	novel.8459	novel.1461	novel.314
Pepsico1_Contig2013.path1	novel.8572	novel.7924	Pepsico1_Contig2555.path1	novel.2779
TRINITY_DN15518_c0_g1_i5.path1	novel.4682	novel.4503	novel.8361	novel.9839
TRINITY_DN24281_c0_g1_i3.path2	Pepsico2_Contig19223.path1	novel.1461	Pepsico2_Contig20515.path1	novel.3627
novel.4682	novel.7863	novel.2779	Pepsico1_Contig672.path2	novel.2894
TRINITY_DN18904_c0_g1_i1.path2	novel.4503	novel.4706	Pepsico1_Contig7726.path1	TRINITY_DN32690_c0_g2_i1.path1
novel.5592	novel.3146	novel.1809	Pepsico1_Contig1872.path2	TRINITY_DN14017_c0_g1_i1.path1
novel.941	TRINITY_DN15251_c0_g1_i1.path2	TRINITY_DN8500_c0_g1_i2.path1	novel.10240	TRINITY_DN22596_c0_g1_i7.path1
novel.9410	novel.7610	novel.4952	novel.10162	Pepsico2_Contig20979.path1
TRINITY_DN8826_c1_g6_i1.path4	TRINITY_DN6606_c0_g1_i1.path2	Pepsico1_Contig1534.path1	Pepsico2_Contig14244.path1	Pepsico2_Contig13314.path2
novel.5381	TRINITY_DN12913_c0_g1_i2.path2	TRINITY_DN5767_c0_g1_i5.path1	Pepsico2_Contig14668.path1	novel.2661
Pepsico1_Contig26654.path1	Pepsico2_Contig18919.path1	novel.3146	novel.10567	novel.2716
TRINITY_DN37142_c0_g1_i1.path2	novel.4471	novel.4682	novel.9882	novel.5528
novel.5386	novel.1530	novel.3162	Pepsico2_Contig6108.path1	TRINITY_DN95322_c0_g1_i1.path1
novel.3033	TRINITY_DN10709_c0_g1_i3.path1	TRINITY_DN4498_c0_g1_i10.path1	TRINITY_DN10664_c1_g6_i1.path3	TRINITY_DN2_c0_g1_i2.path2
Pepsico2_Contig14572.path1	novel.2888	novel.10537	Pepsico2_Contig20241.path1	Pepsico2_Contig7732.path2
novel.5528	Pepsico1_Contig3816.path2	novel.9968	TRINITY_DN8754_c0_g1_i2.path1	Pepsico1_Contig26224.path2
Pepsico2_Contig16986.path1	novel.2389	novel.7451	novel.10221	novel.6259
novel.8756	TRINITY_DN12244_c1_g2_i1.path1	TRINITY_DN17816_c0_g1_i1.path2	Pepsico1_Contig1822.path1	novel.4682
Pepsico1_Contig4160.path2	novel.1809	TRINITY_DN20918_c0_g3_i1.path1	novel.2796	novel.5164
Pepsico1_Contig16695.path1	novel.8451	novel.8563	TRINITY_DN6909_c0_g1_i6.path2	novel.862
novel.6260	TRINITY_DN20918_c0_g3_i1.path1	TRINITY_DN5491_c0_g1_i3.path1	Pepsico2_Contig19695.path1	novel.7451
TRINITY_DN19018_c0_g1_i1.path1	Pepsico2_Contig19104.path1	Pepsico2_Contig14796.path1	novel.10085	TRINITY_DN2111_c0_g1_i1.path1
novel.7720	novel.2961	Pepsico2_Contig20979.path1	Pepsico2_Contig12405.path1	Pepsico2_Contig4472.path1
novel.4909	TRINITY_DN21106_c0_g1_i1.path2	Pepsico2_Contig12984.path1	TRINITY_DN1146_c0_g1_i1.path1	TRINITY_DN17550_c0_g1_i2.path1
novel.4755	novel.8359	novel.213	novel.6752	Pepsico2_Contig9248.path1
TRINITY_DN17816_c0_g1_i1.path2	novel.8003	TRINITY_DN43155_c0_g1_i1.path1	Pepsico2_Contig2718.path1	TRINITY_DN7966_c0_g2_i3.path2
Pepsico2_Contig9614.path1	novel.1680	TRINITY_DN9136_c0_g1_i2.path1	novel.9893	TRINITY_DN6419_c0_g1_i9.path1
novel.10313	novel.5604	novel.8003	Pepsico1_Contig1218.path1	TRINITY_DN30743_c0_g1_i1.path1
novel.1142	novel.6380	TRINITY_DN17550_c0_g1_i2.path1	TRINITY_DN1483_c0_g2_i1.path1	novel.2645
novel.4940	novel.7451	Pepsico1_Contig743.path1	Pepsico2_Contig14383.path1	novel.2014
novel.7451	Pepsico2_Contig9864.path1	Pepsico2_Contig4472.path1	Pepsico1_Contig654.path1	TRINITY_DN9737_c1_g3_i1.path1
TRINITY_DN19704_c0_g1_i1.path1	TRINITY_DN5491_c0_g1_i3.path1	Pepsico2_Contig9864.path1	Pepsico2_Contig640.path1	novel.8223
novel.10027	TRINITY_DN44508_c0_g1_i1.path1	novel.3013	TRINITY_DN22596_c0_g1_i7.path1	Pepsico2_Contig16273.path2
novel.7888	Pepsico2_Contig17284.path1	novel.2961	TRINITY_DN14491_c0_g1_i4.path1	novel.4734
TRINITY_DN6768_c0_g1_i1.path2	novel.8568	novel.1646	Pepsico2_Contig12841.path2	TRINITY_DN7333_c1_g1_i4.path1
TRINITY_DN17093_c0_g1_i1.path1	Pepsico2_Contig2899.path1	Pepsico1_Contig37105.path1	TRINITY_DN2451_c0_g1_i3.path1	novel.8572
novel.10555	novel.9461	novel.3212	Pepsico1_Contig2324.path1	TRINITY_DN5245_c0_g1_i2.path1
TRINITY_DN13842_c0_g2_i2.path1	TRINITY_DN7333_c1_g1_i4.path1	TRINITY_DN7966_c0_g2_i3.path2	TRINITY_DN16456_c0_g2_i15.path2	Pepsico2_Contig14383.path1
Pepsico1_Contig51.path1	TRINITY_DN50134_c0_g1_i1.path1	novel.9461	Pepsico2_Contig13651.path1	novel.9461
novel.3995	novel.7888	novel.3781	novel.6235	novel.2707
TRINITY_DN6436_c0_g1_i2.path1	TRINITY_DN23852_c0_g1_i1.path1	Pepsico2_Contig1967.path1	TRINITY_DN3936_c0_g1_i5.path1	novel.1530
TRINITY_DN79182_c0_g1_i1.path1	Pepsico1_Contig26224.path2	novel.314	novel.7458	novel.8451
novel.8914	novel.6806	novel.1671	novel.1479	novel.8232
Pepsico1_Contig7353.path1	novel.213	Pepsico2_Contig10642.path2	novel.2520	novel.1142
TRINITY_DN16719_c1_g2_i2.path3	novel.10537	Pepsico1_Contig3816.path2	novel.5147	Pepsico2_Contig13651.path1
Pepsico2_Contig12984.path1	TRINITY_DN24832_c0_g2_i4.path1	novel.8572	Pepsico1_Contig26.path1	TRINITY_DN34430_c1_g1_i1.path1
TRINITY_DN17990_c0_g1_i15.path1	novel.6243	Pepsico1_Contig3350.path1	Pepsico1_Contig7260.path2	TRINITY_DN13842_c0_g2_i2.path1
Pepsico2_Contig15364.path1	TRINITY_DN5865_c0_g2_i1.path1	novel.1680	TRINITY_DN17812_c0_g1_i4.path2	TRINITY_DN6909_c0_g1_i6.path2
novel.8178	novel.4026	TRINITY_DN1766_c0_g2_i2.path1	novel.4655	novel.2888
novel.6613	novel.1927	novel.6806	Pepsico2_Contig10073.path1	novel.3146
novel.1387	TRINITY_DN95322_c0_g1_i1.path1	novel.1142	Pepsico2_Contig18201.path1	TRINITY_DN3425_c0_g2_i1.path1
TRINITY_DN38837_c0_g2_i3.path1	novel.3521	Pepsico2_Contig20515.path1	Pepsico2_Contig2081.path2	TRINITY_DN37365_c0_g2_i3.path5
TRINITY_DN9891_c0_g4_i1.path2	TRINITY_DN869_c0_g1_i1.path2	TRINITY_DN12913_c0_g1_i2.path2	novel.9863	novel.321
novel.4335	Pepsico2_Contig7310.path1	TRINITY_DN4340_c0_g3_i1.path1	novel.2138	novel.2833
TRINITY_DN64826_c0_g1_i1.path2	novel.1137	novel.2389	novel.7600	TRINITY_DN1502_c0_g4_i1.path2
novel.3430	TRINITY_DN14877_c0_g1_i2.path1	novel.1692	Pepsico2_Contig17583.path1	Pepsico1_Contig1331.path2
novel.317	Pepsico2_Contig2081.path2	TRINITY_DN7333_c1_g1_i4.path1	Pepsico2_Contig7855.path1	Pepsico1_Contig32234.path1
TRINITY_DN75757_c0_g1_i1.path1	Pepsico2_Contig12433.path2	Pepsico2_Contig13314.path2	TRINITY_DN4576_c0_g2_i2.path1	TRINITY_DN38837_c0_g2_i3.path1
TRINITY_DN8984_c0_g1_i4.path1	novel.6382	TRINITY_DN4449_c0_g1_i3.path2	TRINITY_DN4719_c0_g1_i3.path2	novel.4952
TRINITY_DN24832_c0_g2_i4.path1	TRINITY_DN4340_c0_g3_i1.path1	novel.8195	novel.2978	TRINITY_DN16719_c1_g2_i2.path3
novel.6107	TRINITY_DN17850_c2_g1_i1.path1	novel.6382	novel.4725	TRINITY_DN64826_c0_g1_i1.path2
TRINITY_DN9350_c0_g1_i3.path1	TRINITY_DN11615_c0_g1_i1.path1	novel.641	Pepsico2_Contig15179.path1	TRINITY_DN15185_c0_g3_i5.path2
TRINITY_DN95322_c0_g1_i1.path1	novel.10555	novel.3970	Pepsico2_Contig10871.path1	Pepsico2_Contig14892.path2
TRINITY_DN14937_c0_g1_i2.path2	novel.6209	TRINITY_DN95322_c0_g1_i1.path1	Pepsico2_Contig9614.path1	TRINITY_DN4340_c0_g3_i1.path1
novel.4062	TRINITY_DN9350_c0_g1_i3.path1	novel.8451	Pepsico2_Contig20254.path2	TRINITY_DN20133_c0_g1_i3.path2
novel.6806	novel.3766	TRINITY_DN8826_c1_g6_i1.path4	novel.7460	TRINITY_DN40419_c0_g1_i1.path1
TRINITY_DN40924_c0_g1_i4.path1	TRINITY_DN19935_c0_g1_i10.path1	Pepsico2_Contig10102.path2	novel.8734	novel.10537
TRINITY_DN20918_c0_g3_i1.path1	TRINITY_DN22613_c0_g1_i2.path1	novel.3820	TRINITY_DN74489_c0_g1_i1.path1	novel.1646
novel.2961	Pepsico2_Contig20050.path1	novel.2138	Pepsico1_Contig8200.path1	Pepsico2_Contig3417.path3
novel.5027	TRINITY_DN3936_c0_g1_i5.path1	novel.1610	novel.4342	TRINITY_DN6533_c1_g1_i2.path1
novel.7677	TRINITY_DN87711_c0_g1_i1.path1	novel.9967	TRINITY_DN3478_c0_g1_i6.path1	TRINITY_DN2202_c0_g1_i2.path2
novel.8451	TRINITY_DN78657_c0_g1_i1.path1	TRINITY_DN17850_c2_g1_i1.path1	novel.2531	Pepsico2_Contig8228.path1
TRINITY_DN2111_c0_g1_i1.path1	TRINITY_DN14979_c0_g1_i6.path1	novel.3646	novel.314	novel.2637
Pepsico1_Contig4300.path1	novel.2835	TRINITY_DN6436_c0_g1_i2.path1	Pepsico1_Contig2933.path1	novel.8568
novel.6105	TRINITY_DN38837_c0_g2_i3.path1	novel.1137	Pepsico2_Contig10730.path1	TRINITY_DN20918_c0_g3_i1.path1
novel.5180	novel.5528	Pepsico2_Contig11157.path1	Pepsico2_Contig12461.path1	TRINITY_DN3857_c0_g1_i1.path1
novel.8203	TRINITY_DN16719_c1_g2_i2.path3	TRINITY_DN11598_c0_g1_i1.path1	Pepsico1_Contig6794.path1	novel.7630
novel.8003	TRINITY_DN2111_c0_g1_i1.path1	novel.7630	novel.4594	novel.2961
Pepsico1_Contig4060.path1	Pepsico1_Contig14374.path1	novel.4679	Pepsico2_Contig19399.path1	novel.2138
Pepsico1_Contig3047.path3	novel.1836	Pepsico2_Contig14892.path2	TRINITY_DN69_c1_g2_i2.path2	TRINITY_DN16966_c0_g2_i1.path1
TRINITY_DN7983_c0_g1_i3.path2	novel.8195	TRINITY_DN33358_c0_g2_i1.path1	novel.3212	novel.10221
novel.641	novel.8673	novel.6229	TRINITY_DN97745_c0_g1_i2.path1	Pepsico2_Contig14837.path1
novel.5276	Pepsico1_Contig1037.path1	novel.7383	Pepsico2_Contig17247.path1	novel.2156
Pepsico1_Contig32234.path1	Pepsico1_Contig37105.path1	TRINITY_DN6605_c1_g2_i1.path1	TRINITY_DN506_c0_g1_i4.path1	novel.9197
novel.2530	TRINITY_DN19194_c0_g1_i2.path1	TRINITY_DN11148_c0_g2_i1.path1	TRINITY_DN12148_c0_g1_i2.path1	novel.10085
TRINITY_DN27638_c0_g1_i9.path1	novel.9476	novel.7888	novel.9961	novel.9476
Pepsico2_Contig6462.path2	novel.9687	TRINITY_DN20837_c0_g1_i1.path2	Pepsico2_Contig3720.path2	Pepsico2_Contig19721.path2
Pepsico1_Contig2110.path2	TRINITY_DN37142_c0_g1_i1.path2	Pepsico2_Contig14572.path1	novel.10509	novel.641
TRINITY_DN9396_c0_g1_i1.path2	novel.10518	TRINITY_DN38837_c0_g2_i3.path1	Pepsico2_Contig21370.path1	TRINITY_DN103518_c0_g1_i1.path1
Pepsico1_Contig3816.path2	Pepsico2_Contig12984.path1	novel.6187	novel.2673	novel.7383
novel.1118	novel.6715	TRINITY_DN22824_c0_g1_i2.path1	novel.265	TRINITY_DN19935_c0_g1_i10.path1
novel.2781	TRINITY_DN8984_c0_g1_i4.path1	TRINITY_DN14545_c0_g1_i1.path2	TRINITY_DN102054_c0_g1_i1.path1	novel.4371
novel.4371	TRINITY_DN14976_c1_g2_i1.path1	TRINITY_DN19935_c0_g1_i10.path1	novel.336	novel.5180
TRINITY_DN29163_c0_g5_i1.path1	Pepsico2_Contig746.path1	TRINITY_DN1502_c0_g4_i1.path2	novel.6380	novel.8003
TRINITY_DN13305_c0_g1_i1.path1	TRINITY_DN25070_c0_g1_i1.path1	novel.4471	novel.9760	novel.8001
TRINITY_DN42172_c0_g1_i1.path2	TRINITY_DN12917_c0_g1_i1.path1	TRINITY_DN9350_c0_g1_i3.path1	TRINITY_DN22193_c0_g1_i2.path1	novel.2557
novel.5253	Pepsico2_Contig14938.path1	novel.2835	novel.3063	novel.3477
novel.282	novel.656	novel.8673	novel.650	Pepsico2_Contig441.path1
novel.1165	novel.1386	novel.9837	TRINITY_DN42306_c0_g1_i3.path2	TRINITY_DN12019_c0_g1_i3.path1
TRINITY_DN6942_c0_g1_i2.path1	novel.5276	novel.3430	Pepsico2_Contig15466.path2	TRINITY_DN610_c0_g3_i2.path1
novel.6752	TRINITY_DN86693_c0_g1_i1.path1	TRINITY_DN7691_c0_g5_i1.path1	TRINITY_DN2476_c0_g1_i22.path2	novel.9990
TRINITY_DN30417_c0_g1_i2.path1	Pepsico1_Contig4198.path2	TRINITY_DN15251_c0_g1_i1.path2	Pepsico2_Contig12871.path2	novel.2553
novel.8459	novel.9410	novel.6715	TRINITY_DN9140_c1_g1_i1.path1	Pepsico1_Contig35386.path2
TRINITY_DN9851_c0_g1_i1.path1	TRINITY_DN13842_c0_g2_i2.path1	novel.3766	TRINITY_DN37597_c0_g1_i1.path1	novel.5276
novel.1944	Pepsico1_Contig5732.path2	Pepsico1_Contig6482.path2	novel.2037	novel.3291
novel.7630	novel.5828	Pepsico2_Contig9798.path1	TRINITY_DN7310_c0_g1_i1.path1	TRINITY_DN47897_c0_g1_i1.path1
TRINITY_DN59894_c0_g1_i1.path1	novel.7383	novel.9476	Pepsico1_Contig843.path1	novel.6095
TRINITY_DN9998_c0_g2_i1.path1	novel.641	TRINITY_DN6009_c0_g1_i6.path1	novel.2026	TRINITY_DN6047_c0_g2_i3.path1
TRINITY_DN16565_c0_g1_i1.path1	TRINITY_DN13332_c0_g1_i6.path1	novel.10251	novel.10145	novel.2530
novel.5961	TRINITY_DN64826_c0_g1_i1.path2	novel.1836	Pepsico1_Contig5136.path1	novel.7970
novel.10055	novel.3646	TRINITY_DN21826_c0_g1_i1.path1	novel.6722	Pepsico2_Contig19238.path1
novel.6106	novel.1114	TRINITY_DN78657_c0_g1_i1.path1	Pepsico2_Contig17686.path1	novel.455
novel.9461	novel.3477	novel.1935	novel.8772	Pepsico1_Contig526.path2
novel.7383	Pepsico2_Contig11219.path2	TRINITY_DN27818_c0_g1_i1.path2	TRINITY_DN553_c0_g2_i1.path1	novel.10157
novel.9476	TRINITY_DN40924_c0_g1_i4.path1	novel.6473	Pepsico2_Contig3093.path2	novel.2968
TRINITY_DN21011_c0_g1_i7.path1	novel.8203	TRINITY_DN5662_c0_g1_i3.path1	Pepsico1_Contig3350.path1	novel.10555
novel.10363	novel.10180	novel.5528	TRINITY_DN95322_c0_g1_i1.path1	novel.3430
novel.213	novel.3781	TRINITY_DN10471_c0_g2_i1.path1	TRINITY_DN1462_c0_g4_i1.path1	novel.4755
Pepsico2_Contig14892.path2	TRINITY_DN6533_c0_g1_i1.path1	novel.6855	novel.3820	TRINITY_DN3337_c1_g1_i2.path2
novel.3766	Pepsico1_Contig3350.path1	TRINITY_DN40924_c0_g1_i4.path1	TRINITY_DN4934_c0_g1_i2.path1	TRINITY_DN11615_c0_g1_i1.path1
novel.3291	Pepsico1_Contig26654.path1	novel.2990	TRINITY_DN15790_c0_g1_i3.path2	novel.90
Pepsico2_Contig16925.path1	TRINITY_DN9396_c0_g1_i1.path2	TRINITY_DN2111_c0_g1_i1.path1	novel.1466	novel.10105
TRINITY_DN9851_c0_g1_i1.path2	novel.2530	novel.6239	novel.3162	novel.8485
novel.3765	novel.5865	TRINITY_DN64826_c0_g1_i1.path2	novel.7311	Pepsico1_Contig6661.path2
novel.1374	TRINITY_DN6605_c1_g1_i5.path2	TRINITY_DN9621_c0_g1_i4.path3	TRINITY_DN5767_c0_g1_i5.path1	novel.5253
novel.8673	novel.5180	novel.3291	novel.5604	novel.8195
novel.8195	novel.3212	novel.5180	novel.2733	novel.7309
novel.6229	novel.8178	novel.729	novel.1386	TRINITY_DN5920_c1_g2_i3.path1
Pepsico2_Contig7855.path1	Pepsico2_Contig16540.path1	Pepsico2_Contig14039.path1	TRINITY_DN24832_c0_g2_i4.path1	novel.10363
novel.10043	novel.7004	Pepsico2_Contig7831.path2	Pepsico2_Contig7702.path1	Pepsico1_Contig165.path1
novel.2557	novel.4484	novel.7650	TRINITY_DN2_c0_g3_i1.path1	TRINITY_DN39067_c0_g1_i1.path1
Pepsico2_Contig17380.path1	novel.10251	TRINITY_DN8984_c0_g1_i4.path1	TRINITY_DN88045_c0_g1_i1.path1	novel.10518
Pepsico1_Contig37105.path1	TRINITY_DN26763_c0_g1_i1.path1	TRINITY_DN1550_c3_g1_i2.path1	Pepsico2_Contig7732.path2	Pepsico2_Contig2456.path2
TRINITY_DN5732_c0_g1_i3.path2	TRINITY_DN75610_c0_g1_i1.path1	TRINITY_DN13432_c0_g1_i1.path1	TRINITY_DN37365_c0_g2_i3.path1	novel.10519
Pepsico1_Contig14374.path1	novel.1944	novel.8568	Pepsico2_Contig1933.path1	TRINITY_DN29640_c0_g3_i1.path1
novel.342	novel.4003	Pepsico2_Contig11358.path1	Pepsico2_Contig18493.path1	novel.2781
TRINITY_DN12620_c0_g1_i2.path3	TRINITY_DN9891_c0_g4_i1.path2	novel.8055	TRINITY_DN9737_c1_g3_i1.path1	novel.9847
Pepsico1_Contig4996.path1	TRINITY_DN4719_c0_g1_i3.path2	TRINITY_DN16719_c1_g2_i2.path3	TRINITY_DN35472_c1_g1_i1.path1	novel.2990
TRINITY_DN17093_c0_g1_i1.path2	novel.1935	TRINITY_DN9696_c0_g1_i1.path1	novel.4503	TRINITY_DN13229_c0_g1_i1.path1
Pepsico2_Contig16925.path2	novel.1387	Pepsico2_Contig16273.path2	novel.7863	TRINITY_DN17386_c0_g1_i6.path1
novel.8572	novel.8690	Pepsico2_Contig14877.path1	TRINITY_DN2202_c0_g1_i2.path2	TRINITY_DN14372_c0_g1_i1.path2
TRINITY_DN74782_c0_g1_i1.path1	TRINITY_DN3180_c0_g2_i1.path2	novel.5865	novel.4425	novel.9833
Pepsico2_Contig17548.path1	novel.3291	Pepsico2_Contig9614.path1	novel.1809	Pepsico2_Contig14411.path2
novel.10518	novel.1466	TRINITY_DN17358_c1_g2_i4.path1	TRINITY_DN14241_c0_g1_i1.path1	TRINITY_DN8659_c0_g2_i1.path1
TRINITY_DN8659_c0_g2_i1.path1	Pepsico1_Contig3448.path1	Pepsico2_Contig12172.path1	novel.3781	TRINITY_DN9300_c0_g1_i5.path3
novel.2911	novel.1419	novel.5828	Pepsico2_Contig19544.path1	TRINITY_DN36958_c0_g2_i1.path1
Pepsico2_Contig7732.path2	novel.862	novel.4003	novel.4252	Pepsico2_Contig4524.path2
Pepsico1_Contig1878.path1	novel.2990	Pepsico1_Contig14374.path1	TRINITY_DN618_c0_g1_i2.path1	TRINITY_DN11054_c1_g2_i2.path1
novel.1294	novel.5177	novel.8690	TRINITY_DN1030_c0_g1_i11.path1	novel.7428
TRINITY_DN24094_c0_g1_i2.path1	Pepsico2_Contig4472.path1	novel.10247	novel.1927	novel.213
TRINITY_DN12917_c0_g1_i1.path1	novel.1905	TRINITY_DN4769_c0_g1_i5.path1	novel.6238	TRINITY_DN17816_c0_g1_i1.path2
TRINITY_DN21343_c0_g1_i4.path2	novel.6239	TRINITY_DN14976_c1_g2_i1.path1	TRINITY_DN69_c2_g1_i1.path2	novel.4584
novel.2990	novel.10055	Pepsico1_Contig1320.path1	novel.10319	TRINITY_DN92266_c0_g1_i1.path1
novel.6583	Pepsico2_Contig14420.path1	TRINITY_DN71897_c0_g1_i1.path1	TRINITY_DN2038_c0_g1_i6.path1	Pepsico1_Contig3047.path3
novel.7235	Pepsico1_Contig7353.path1	TRINITY_DN869_c0_g1_i1.path2	TRINITY_DN4868_c0_g1_i1.path2	TRINITY_DN22311_c0_g1_i7.path1
novel.5865	novel.10352	novel.6109	novel.8532	TRINITY_DN52025_c0_g1_i2.path1
novel.3428	novel.324	TRINITY_DN14975_c0_g1_i4.path1	Pepsico1_Contig216.path2	Pepsico1_Contig14696.path1
TRINITY_DN23116_c0_g1_i1.path1	novel.5452	novel.4755	TRINITY_DN11601_c0_g1_i2.path1	novel.10055
TRINITY_DN11897_c0_g1_i1.path2	novel.8001	Pepsico2_Contig12367.path2	novel.2731	TRINITY_DN231_c2_g3_i1.path1
novel.3212	novel.7251	TRINITY_DN24907_c0_g1_i4.path1	Pepsico2_Contig3093.path1	Pepsico2_Contig16302.path1
novel.6187	TRINITY_DN26545_c0_g1_i1.path2	novel.2911	novel.10511	novel.7650
novel.8387	Pepsico2_Contig7732.path2	novel.4666	TRINITY_DN7514_c0_g1_i3.path2	novel.6415
novel.6380	TRINITY_DN71897_c0_g1_i1.path1	TRINITY_DN5865_c0_g2_i1.path1	Pepsico2_Contig20249.path1	novel.1410
Pepsico1_Contig33634.path1	TRINITY_DN3886_c0_g1_i7.path2	novel.5276	novel.9740	TRINITY_DN75417_c0_g1_i1.path2
Pepsico2_Contig14796.path1	TRINITY_DN6436_c0_g1_i2.path1	TRINITY_DN6047_c1_g1_i1.path1	novel.8914	TRINITY_DN29776_c0_g2_i1.path1
TRINITY_DN66437_c0_g1_i1.path1	Pepsico1_Contig2142.path1	novel.2888	TRINITY_DN34205_c0_g1_i1.path1	Pepsico2_Contig19695.path1
novel.4344	TRINITY_DN23079_c0_g1_i1.path1	novel.2098	novel.9881	novel.5865
Pepsico2_Contig14557.path1	TRINITY_DN25788_c0_g1_i1.path2	TRINITY_DN24832_c0_g2_i4.path1	TRINITY_DN24505_c0_g1_i1.path1	TRINITY_DN15668_c0_g3_i2.path1
TRINITY_DN9300_c0_g1_i5.path3	TRINITY_DN33054_c4_g1_i1.path4	novel.2833	TRINITY_DN19704_c0_g1_i1.path1	Pepsico2_Contig17223.path2
TRINITY_DN19935_c0_g1_i10.path1	TRINITY_DN59894_c0_g1_i1.path1	TRINITY_DN7514_c0_g1_i3.path2	Pepsico2_Contig9864.path1	novel.1140
TRINITY_DN48093_c0_g1_i1.path1	Pepsico1_Contig7054.path2	Pepsico1_Contig1822.path1	TRINITY_DN27590_c0_g1_i2.path1	novel.10116
novel.2783	novel.10363	novel.324	novel.2894	TRINITY_DN6605_c1_g2_i1.path1
novel.8523	TRINITY_DN7645_c0_g1_i2.path1	TRINITY_DN6533_c0_g1_i1.path1	Pepsico2_Contig18659.path1	novel.6114
novel.6722	novel.4584	novel.4645	TRINITY_DN1502_c0_g4_i1.path2	TRINITY_DN39232_c0_g3_i1.path1
TRINITY_DN12218_c0_g1_i4.path1	novel.2911	novel.159	Pepsico2_Contig9211.path2	Pepsico1_Contig211.path1
TRINITY_DN15215_c0_g1_i1.path1	novel.7630	novel.1419	TRINITY_DN13914_c0_g1_i2.path1	novel.4814
novel.206	novel.8697	novel.6209	novel.6513	TRINITY_DN6605_c1_g4_i2.path1
novel.9279	Pepsico2_Contig1721.path1	novel.8977	novel.1137	Pepsico1_Contig672.path2
novel.8485	novel.3027	Pepsico2_Contig14533.path1	novel.941	Pepsico1_Contig7022.path1
novel.10519	novel.2781	novel.9610	Pepsico2_Contig9117.path1	Pepsico1_Contig26.path1
novel.5616	novel.8322	novel.3477	novel.6526	novel.2725
Pepsico2_Contig2883.path1	novel.1646	Pepsico1_Contig2258.path2	novel.6912	TRINITY_DN9135_c0_g1_i1.path1
TRINITY_DN6605_c1_g1_i5.path2	Pepsico2_Contig16273.path2	TRINITY_DN9891_c0_g4_i1.path2	TRINITY_DN5246_c0_g1_i1.path2	TRINITY_DN35638_c0_g1_i4.path2
Pepsico1_Contig7054.path2	TRINITY_DN61508_c0_g1_i1.path1	TRINITY_DN11709_c0_g1_i4.path2	novel.2779	novel.8341
novel.2965	TRINITY_DN80711_c0_g1_i1.path3	TRINITY_DN13842_c0_g2_i2.path1	TRINITY_DN4456_c0_g2_i10.path4	novel.4643
TRINITY_DN18035_c0_g2_i2.path1	novel.7677	TRINITY_DN26763_c0_g1_i1.path1	Pepsico2_Contig13157.path1	Pepsico2_Contig12221.path2
novel.6209	TRINITY_DN84546_c0_g1_i1.path1	TRINITY_DN11615_c0_g1_i1.path1	novel.10226	novel.1419
Pepsico2_Contig13278.path1	novel.7650	novel.4731	Pepsico2_Contig9123.path2	novel.7677
TRINITY_DN3208_c0_g1_i1.path2	novel.8485	Pepsico2_Contig31.path1	novel.10563	Pepsico2_Contig11038.path1
TRINITY_DN20542_c1_g1_i1.path1	TRINITY_DN13305_c0_g1_i1.path1	novel.5253	novel.1692	novel.2290
TRINITY_DN6007_c0_g1_i6.path2	novel.8387	novel.6925	Pepsico2_Contig8262.path1	novel.4471
TRINITY_DN9602_c0_g2_i2.path1	novel.942	TRINITY_DN7691_c0_g4_i1.path1	TRINITY_DN7966_c0_g2_i3.path2	novel.2734
novel.8001	novel.6095	novel.4371	novel.10190	TRINITY_DN17128_c0_g1_i1.path1
novel.3477	novel.3430	TRINITY_DN13914_c0_g1_i2.path1	Pepsico2_Contig17142.path1	TRINITY_DN8599_c1_g1_i3.path2
TRINITY_DN20454_c1_g1_i1.path1	novel.2532	TRINITY_DN30626_c0_g1_i1.path1	novel.10148	novel.9955
novel.1905	TRINITY_DN21334_c0_g1_i1.path2	novel.8178	Pepsico1_Contig3816.path2	novel.6808
Pepsico1_Contig27172.path2	TRINITY_DN12888_c1_g1_i3.path1	TRINITY_DN2038_c0_g1_i6.path1	novel.1530	novel.7766
novel.4543	TRINITY_DN14377_c0_g2_i1.path1	TRINITY_DN37142_c0_g1_i1.path2	TRINITY_DN10594_c0_g1_i4.path2	TRINITY_DN7072_c0_g2_i1.path1
novel.9996	TRINITY_DN12620_c0_g1_i2.path3	Pepsico1_Contig1382.path2	TRINITY_DN22972_c0_g1_i1.path1	Pepsico2_Contig6342.path1
novel.1466	TRINITY_DN7146_c0_g1_i2.path3	novel.7251	TRINITY_DN11435_c0_g1_i6.path1	novel.6806
TRINITY_DN11270_c1_g1_i1.path1	TRINITY_DN7691_c0_g4_i1.path1	TRINITY_DN10806_c1_g1_i1.path1	novel.4289	Pepsico2_Contig12731.path1
TRINITY_DN20837_c0_g1_i1.path2	Pepsico2_Contig14269.path1	TRINITY_DN8779_c0_g2_i3.path2	Pepsico1_Contig4160.path2	Pepsico2_Contig16540.path1
TRINITY_DN21449_c0_g6_i1.path1	novel.4731	novel.3033	TRINITY_DN2761_c0_g2_i3.path1	TRINITY_DN18326_c0_g1_i2.path1
TRINITY_DN4827_c1_g1_i1.path2	novel.5524	novel.2530	Pepsico2_Contig17799.path1	novel.313
TRINITY_DN11709_c0_g1_i4.path2	TRINITY_DN31406_c0_g3_i1.path1	TRINITY_DN20744_c0_g1_i2.path2	novel.9912	Pepsico1_Contig1872.path2
TRINITY_DN33054_c1_g1_i1.path1	novel.4371	novel.10352	novel.2014	novel.6807
Pepsico2_Contig19897.path2	novel.282	TRINITY_DN44861_c0_g1_i1.path1	novel.2553	novel.10352
Pepsico1_Contig4128.path1	TRINITY_DN5346_c1_g1_i4.path1	Pepsico2_Contig17568.path1	novel.7888	TRINITY_DN29163_c0_g5_i1.path1
TRINITY_DN45534_c0_g1_i1.path1	TRINITY_DN26026_c0_g1_i4.path1	Pepsico1_Contig11308.path2	Pepsico1_Contig37116.path1	novel.2007
TRINITY_DN4340_c0_g3_i1.path1	novel.5826	TRINITY_DN47113_c0_g3_i1.path1	Pepsico2_Contig20979.path1	TRINITY_DN45789_c0_g1_i1.path1
novel.1946	TRINITY_DN21449_c0_g6_i1.path1	novel.4584	novel.9197	TRINITY_DN9260_c0_g1_i7.path2
novel.1453	novel.9846	novel.8322	TRINITY_DN8242_c0_g2_i11.path1	TRINITY_DN79182_c0_g1_i1.path1
TRINITY_DN24481_c0_g1_i3.path1	novel.4814	novel.2968	novel.1396	novel.2911
novel.408	TRINITY_DN75417_c0_g1_i1.path2	TRINITY_DN111692_c0_g1_i1.path3	novel.8982	Pepsico2_Contig646.path1
TRINITY_DN62941_c0_g1_i1.path1	novel.9833	novel.6260	novel.662	TRINITY_DN17584_c0_g2_i6.path1
novel.3646	novel.5253	novel.4787	novel.2389	novel.9881
novel.9751	TRINITY_DN27422_c0_g1_i2.path1	novel.6206	novel.4663	novel.1201
Pepsico1_Contig342.path1	TRINITY_DN33054_c1_g1_i1.path1	TRINITY_DN15790_c0_g1_i3.path2	Pepsico2_Contig14026.path1	novel.8322
TRINITY_DN21343_c0_g1_i4.path1	TRINITY_DN20542_c1_g1_i1.path1	TRINITY_DN52375_c0_g1_i2.path1	TRINITY_DN15210_c0_g1_i2.path1	Pepsico2_Contig14269.path1
TRINITY_DN21334_c0_g1_i1.path2	TRINITY_DN115535_c0_g1_i1.path5	Pepsico2_Contig4950.path1	Pepsico1_Contig6351.path1	Pepsico2_Contig19574.path1
novel.9719	novel.356	Pepsico1_Contig2484.path1	Pepsico2_Contig7383.path1	novel.5147
Pepsico1_Contig35386.path2	TRINITY_DN24001_c0_g1_i1.path1	Pepsico1_Contig2110.path2	novel.2645	novel.9872
TRINITY_DN15966_c0_g1_i1.path1	novel.4737	TRINITY_DN6606_c0_g1_i1.path2	novel.9726	novel.7728
novel.6239	TRINITY_DN10334_c0_g1_i5.path1	novel.6247	novel.4242	novel.7288
novel.1410	TRINITY_DN3209_c0_g3_i1.path2	novel.10554	Pepsico2_Contig17816.path1	novel.1691
TRINITY_DN20293_c0_g1_i1.path1	TRINITY_DN32868_c0_g1_i1.path2	TRINITY_DN13332_c0_g1_i6.path1	novel.4682	novel.2856
novel.6925	Pepsico1_Contig2094.path1	TRINITY_DN22284_c0_g2_i1.path1	novel.7451	novel.4543
novel.4380	TRINITY_DN15282_c0_g1_i1.path1	novel.1840	TRINITY_DN6951_c0_g1_i14.path1	Pepsico2_Contig12616.path1
novel.90	TRINITY_DN4360_c2_g1_i3.path2	novel.1050	novel.213	novel.6382
TRINITY_DN42762_c0_g1_i1.path3	novel.3199	novel.3199	novel.3146	novel.2751
novel.10131	TRINITY_DN24906_c0_g1_i3.path1	novel.1140	TRINITY_DN14017_c0_g1_i1.path1	TRINITY_DN15966_c0_g1_i1.path1
TRINITY_DN33054_c4_g1_i1.path4	TRINITY_DN9377_c0_g5_i1.path1	Pepsico1_Contig26654.path1	TRINITY_DN25556_c0_g2_i1.path1	TRINITY_DN66384_c0_g1_i1.path1
novel.4161	novel.4543	novel.5451	novel.4095	novel.2527
novel.1935	TRINITY_DN18904_c0_g1_i1.path2	novel.148	novel.9944	novel.5600
Pepsico1_Contig3834.path1	novel.9610	TRINITY_DN84546_c0_g1_i1.path1	novel.4787	TRINITY_DN13914_c0_g1_i2.path1
TRINITY_DN67948_c0_g1_i1.path1	novel.5616	TRINITY_DN39067_c0_g1_i1.path1	novel.9585	Pepsico1_Contig16695.path1
novel.5781	Pepsico2_Contig19897.path2	TRINITY_DN17371_c0_g1_i18.path3	novel.7746	novel.6239
Pepsico1_Contig1236.path1	novel.2796	novel.10363	novel.2661	novel.1387
Pepsico1_Contig17968.path1	Pepsico2_Contig14039.path1	novel.6121	Pepsico2_Contig16540.path1	novel.2871
novel.33	TRINITY_DN29163_c0_g5_i1.path1	novel.3854	novel.6683	novel.6121
Pepsico1_Contig1037.path1	TRINITY_DN12916_c0_g4_i1.path1	TRINITY_DN12254_c0_g1_i1.path1	Pepsico2_Contig14014.path1	TRINITY_DN27826_c0_g1_i1.path1
novel.7142	TRINITY_DN1502_c0_g4_i1.path2	novel.5826	novel.6217	Pepsico2_Contig11063.path1
TRINITY_DN1502_c0_g4_i1.path2	novel.2079	TRINITY_DN20630_c0_g1_i1.path1	novel.9839	TRINITY_DN24214_c0_g2_i1.path1
novel.4783	Pepsico2_Contig4727.path1	TRINITY_DN115535_c0_g1_i1.path5	TRINITY_DN285_c1_g1_i1.path1	novel.33
novel.6586	novel.8976	TRINITY_DN2760_c0_g1_i8.path1	TRINITY_DN8984_c0_g1_i4.path1	TRINITY_DN12396_c0_g1_i1.path1
novel.230	TRINITY_DN17358_c1_g2_i4.path1	novel.3530	novel.9967	TRINITY_DN22632_c0_g2_i1.path1
novel.2856	novel.8967	TRINITY_DN8242_c0_g2_i11.path1	novel.641	Pepsico2_Contig3137.path1
Pepsico2_Contig9798.path1	novel.4259	novel.5975	Pepsico2_Contig12984.path1	novel.4214
novel.1927	novel.2557	TRINITY_DN32690_c0_g2_i1.path1	novel.5164	Pepsico2_Contig8796.path2
novel.4014	Pepsico1_Contig346.path1	TRINITY_DN57575_c0_g1_i2.path2	TRINITY_DN103518_c0_g1_i1.path1	Pepsico2_Contig19872.path1
novel.10352	novel.8994	novel.4543	Pepsico2_Contig14572.path1	novel.10043
TRINITY_DN25624_c0_g1_i4.path1	Pepsico1_Contig51.path1	novel.3027	novel.10518	novel.6586
TRINITY_DN57575_c0_g1_i2.path2	novel.8582	TRINITY_DN25556_c0_g2_i1.path1	novel.8003	TRINITY_DN3806_c0_g1_i1.path2
novel.6783	novel.1803	Pepsico1_Contig5984.path1	TRINITY_DN8330_c1_g1_i1.path1	novel.324
novel.3671	novel.2968	TRINITY_DN22613_c0_g1_i2.path1	novel.7364	novel.10504
novel.7592	Pepsico2_Contig14959.path1	TRINITY_DN33054_c4_g1_i1.path4	novel.10537	TRINITY_DN3070_c1_g1_i2.path2
TRINITY_DN24150_c0_g2_i3.path2	Pepsico1_Contig35948.path1	novel.2455	TRINITY_DN6533_c1_g1_i2.path1	TRINITY_DN108478_c0_g1_i1.path4
novel.910	TRINITY_DN80803_c0_g1_i1.path1	novel.103	novel.7668	novel.1905
novel.7855	novel.4279	novel.5923	novel.1680	novel.4259
TRINITY_DN31720_c0_g1_i1.path4	TRINITY_DN8734_c0_g1_i2.path2	TRINITY_DN9377_c0_g5_i1.path1	novel.8001	Pepsico2_Contig14058.path1
novel.7623	TRINITY_DN1457_c0_g2_i3.path1	TRINITY_DN9289_c0_g1_i1.path1	novel.9913	novel.133
novel.9833	TRINITY_DN99434_c0_g1_i1.path1	novel.4200	novel.2961	TRINITY_DN37599_c0_g1_i2.path1
TRINITY_DN24214_c0_g2_i1.path1	TRINITY_DN69479_c0_g1_i1.path2	novel.1466	TRINITY_DN27095_c0_g1_i1.path1	TRINITY_DN37142_c0_g1_i1.path2
novel.4263	Pepsico2_Contig14572.path1	TRINITY_DN25788_c0_g1_i1.path2	TRINITY_DN51144_c0_g1_i3.path1	TRINITY_DN37492_c0_g1_i1.path1
TRINITY_DN5669_c0_g1_i1.path1	Pepsico2_Contig19977.path1	novel.7927	Pepsico2_Contig16302.path1	Pepsico2_Contig11217.path1
TRINITY_DN22428_c1_g1_i2.path1	novel.1344	novel.4279	novel.9814	novel.10251
novel.10157	TRINITY_DN3360_c0_g1_i5.path1	Pepsico2_Contig19897.path2	Pepsico1_Contig838.path1	TRINITY_DN20293_c0_g1_i1.path1
novel.8292	novel.8223	Pepsico2_Contig19157.path1	TRINITY_DN17550_c0_g1_i2.path1	Pepsico2_Contig15179.path1
TRINITY_DN70501_c0_g1_i1.path1	novel.5935	novel.10555	novel.10508	Pepsico2_Contig13141.path1
TRINITY_DN20328_c0_g1_i1.path2	novel.10554	Pepsico1_Contig7716.path1	Pepsico2_Contig20218.path1	TRINITY_DN21334_c0_g1_i1.path2
novel.10147	novel.5845	novel.6823	Pepsico2_Contig11944.path1	novel.8387
TRINITY_DN11737_c0_g2_i1.path1	novel.7593	novel.455	Pepsico2_Contig1953.path1	Pepsico2_Contig14543.path2
novel.1070	TRINITY_DN11737_c0_g2_i1.path1	novel.1905	TRINITY_DN11475_c0_g2_i2.path1	TRINITY_DN22428_c1_g1_i2.path1
TRINITY_DN111593_c0_g1_i1.path1	novel.6823	novel.90	novel.6482	TRINITY_DN5585_c0_g2_i1.path1
novel.7437	Pepsico1_Contig4046.path1	TRINITY_DN6181_c1_g1_i1.path1	TRINITY_DN86693_c0_g1_i1.path1	TRINITY_DN571_c0_g2_i1.path1
novel.609	novel.9782	novel.6122	novel.2716	novel.242
novel.5935	TRINITY_DN11475_c0_g6_i1.path1	TRINITY_DN29776_c0_g2_i1.path1	Pepsico2_Contig9248.path1	TRINITY_DN50826_c0_g1_i13.path1
novel.8223	TRINITY_DN16663_c1_g1_i1.path2	TRINITY_DN27422_c0_g1_i2.path1	TRINITY_DN6133_c4_g1_i1.path1	novel.1760
novel.8697	novel.1768	novel.4586	TRINITY_DN9402_c0_g1_i1.path1	TRINITY_DN115535_c0_g1_i1.path5
novel.9244	Pepsico2_Contig17839.path1	TRINITY_DN13190_c0_g1_i1.path1	novel.4272	novel.4720
novel.3027	novel.5027	TRINITY_DN43075_c0_g1_i2.path3	TRINITY_DN6812_c1_g1_i11.path1	novel.1918
novel.6715	novel.2014	Pepsico2_Contig17284.path1	TRINITY_DN8599_c1_g1_i3.path2	TRINITY_DN74831_c0_g1_i1.path1
TRINITY_DN101536_c0_g1_i1.path1	Pepsico1_Contig38400.path1	Pepsico2_Contig2899.path1	Pepsico2_Contig20195.path1	TRINITY_DN60693_c0_g1_i7.path2
TRINITY_DN3857_c0_g2_i1.path2	TRINITY_DN21547_c0_g2_i1.path2	Pepsico1_Contig26224.path2	novel.9553	novel.1692
Pepsico1_Contig35398.path1	TRINITY_DN30743_c0_g1_i1.path1	novel.5042	novel.4952	novel.5853
novel.6966	Pepsico1_Contig7129.path1	novel.3995	Pepsico1_Contig758.path2	TRINITY_DN31467_c1_g2_i2.path2
novel.309	Pepsico2_Contig20227.path3	TRINITY_DN31406_c0_g3_i1.path1	TRINITY_DN11920_c0_g1_i2.path1	Pepsico2_Contig19388.path2
TRINITY_DN8094_c0_g1_i2.path1	novel.10043	TRINITY_DN21547_c0_g2_i1.path2	Pepsico1_Contig6661.path2	Pepsico2_Contig2899.path1
novel.3577	novel.3939	Pepsico2_Contig18919.path1	TRINITY_DN4340_c0_g3_i1.path1	novel.7457
TRINITY_DN27300_c0_g1_i1.path2	Pepsico2_Contig10933.path1	TRINITY_DN12218_c0_g1_i4.path1	TRINITY_DN6419_c0_g1_i9.path1	Pepsico2_Contig6647.path1
TRINITY_DN34430_c0_g3_i1.path1	TRINITY_DN73847_c0_g1_i1.path1	novel.6259	TRINITY_DN9796_c0_g1_i1.path1	novel.9843
novel.8160	TRINITY_DN14386_c0_g1_i3.path1	Pepsico2_Contig13651.path1	Pepsico2_Contig16273.path2	TRINITY_DN51081_c0_g1_i1.path1
novel.9905	TRINITY_DN493_c0_g3_i1.path2	novel.10504	novel.4101	TRINITY_DN97391_c0_g1_i1.path1
TRINITY_DN46218_c0_g1_i1.path1	novel.342	Pepsico1_Contig1287.path1	novel.9461	TRINITY_DN8826_c1_g6_i1.path4
Pepsico2_Contig16273.path2	novel.9814	TRINITY_DN5246_c0_g1_i1.path2	novel.4234	TRINITY_DN19237_c0_g1_i2.path1
Pepsico1_Contig4160.path1	TRINITY_DN115449_c0_g1_i1.path1	novel.10190	TRINITY_DN19935_c0_g1_i10.path1	TRINITY_DN17604_c0_g2_i4.path1
novel.7924	novel.4284	Pepsico2_Contig6108.path1	novel.4666	novel.875
novel.5110	Pepsico1_Contig25437.path1	TRINITY_DN49776_c0_g1_i1.path3	TRINITY_DN2867_c0_g1_i4.path2	TRINITY_DN5198_c0_g2_i1.path1
novel.5820	novel.2833	novel.2290	novel.9873	TRINITY_DN26990_c0_g1_i3.path1
novel.242	TRINITY_DN5734_c0_g1_i5.path2	novel.4576	TRINITY_DN20918_c0_g3_i1.path1	TRINITY_DN17221_c0_g1_i5.path2
Pepsico2_Contig12598.path1	TRINITY_DN86613_c0_g1_i1.path1	TRINITY_DN21449_c0_g6_i1.path1	novel.1142	novel.5524
novel.3753	TRINITY_DN9412_c0_g3_i1.path1	TRINITY_DN9021_c0_g2_i5.path1	novel.8780	novel.3854
novel.8690	TRINITY_DN62941_c0_g1_i1.path1	Pepsico2_Contig14420.path1	TRINITY_DN24114_c0_g1_i2.path1	TRINITY_DN111692_c0_g1_i1.path3
TRINITY_DN11475_c0_g6_i1.path1	TRINITY_DN52196_c0_g1_i1.path2	novel.2552	TRINITY_DN12254_c0_g1_i1.path1	TRINITY_DN10233_c0_g1_i13.path2
novel.4731	Pepsico1_Contig3168.path3	Pepsico2_Contig4029.path1	TRINITY_DN5245_c0_g1_i2.path1	TRINITY_DN56621_c0_g2_i1.path1
novel.9592	TRINITY_DN46281_c0_g1_i1.path3	Pepsico2_Contig12616.path1	TRINITY_DN32690_c0_g2_i1.path1	TRINITY_DN12218_c0_g1_i4.path1
TRINITY_DN11108_c0_g1_i6.path1	novel.8272	novel.2557	TRINITY_DN39677_c0_g1_i1.path1	novel.1783
novel.5271	TRINITY_DN22267_c0_g1_i4.path1	Pepsico1_Contig1127.path1	Pepsico1_Contig264.path1	novel.9822
TRINITY_DN3209_c0_g3_i1.path2	TRINITY_DN79182_c0_g1_i1.path1	novel.9579	novel.10105	novel.4819
novel.4577	novel.9826	TRINITY_DN19250_c0_g1_i1.path1	TRINITY_DN19092_c0_g1_i1.path1	TRINITY_DN86693_c0_g1_i1.path1
TRINITY_DN32090_c0_g1_i1.path1	Pepsico1_Contig35386.path2	Pepsico2_Contig10651.path1	novel.8071	novel.8178
TRINITY_DN14491_c0_g1_i4.path1	TRINITY_DN16976_c0_g1_i9.path2	Pepsico2_Contig12405.path1	novel.7674	TRINITY_DN52025_c0_g2_i1.path1
novel.133	novel.1786	Pepsico2_Contig19574.path1	TRINITY_DN5491_c0_g1_i3.path1	Pepsico2_Contig6611.path3
novel.4259	novel.4783	novel.7437	TRINITY_DN30743_c0_g1_i1.path1	TRINITY_DN15668_c0_g2_i1.path1
novel.4003	novel.10504	novel.2139	novel.2888	TRINITY_DN18237_c1_g5_i1.path1
TRINITY_DN19194_c0_g1_i2.path1	novel.1140	Pepsico2_Contig14270.path1	TRINITY_DN7333_c1_g1_i4.path1	TRINITY_DN16098_c0_g1_i3.path1
novel.6247	TRINITY_DN7983_c0_g1_i3.path2	novel.2553	Pepsico2_Contig10790.path1	TRINITY_DN12254_c0_g1_i1.path1
novel.6814	TRINITY_DN16565_c0_g1_i1.path1	Pepsico2_Contig12871.path2	Pepsico2_Contig441.path1	TRINITY_DN11737_c0_g2_i1.path1
novel.6158	novel.3577	novel.1783	novel.2728	novel.7997
TRINITY_DN8148_c0_g1_i1.path2	Pepsico2_Contig19157.path1	novel.1944	novel.4731	TRINITY_DN7698_c0_g1_i1.path1
novel.4737	novel.9805	TRINITY_DN14377_c0_g2_i1.path1	TRINITY_DN16260_c0_g5_i1.path1	TRINITY_DN2294_c1_g3_i1.path2
novel.2603	TRINITY_DN12102_c0_g1_i2.path1	Pepsico1_Contig672.path2	TRINITY_DN2760_c0_g1_i8.path1	novel.1610
TRINITY_DN30601_c0_g1_i1.path1	TRINITY_DN8070_c0_g1_i2.path1	novel.9814	Pepsico1_Contig7017.path2	Pepsico1_Contig4160.path1
TRINITY_DN13332_c0_g1_i6.path1	Pepsico2_Contig9193.path1	Pepsico2_Contig12701.path2	novel.2637	TRINITY_DN493_c0_g3_i1.path5
Pepsico2_Contig2081.path2	TRINITY_DN27638_c0_g1_i9.path1	novel.7739	TRINITY_DN11148_c0_g2_i1.path1	novel.4139
novel.7468	novel.6825	novel.4259	novel.8846	novel.7102
TRINITY_DN18694_c0_g1_i1.path1	Pepsico2_Contig1590.path1	novel.5027	novel.10248	novel.2532
novel.7650	Pepsico1_Contig4160.path1	novel.6174	novel.5034	TRINITY_DN42792_c0_g4_i1.path1
novel.6808	TRINITY_DN9300_c0_g1_i5.path3	novel.8001	Pepsico2_Contig2890.path1	TRINITY_DN21449_c0_g6_i1.path1
novel.2260	TRINITY_DN20293_c0_g1_i1.path1	novel.4737	novel.7383	novel.8977
Pepsico1_Contig92.path1	TRINITY_DN24481_c0_g1_i3.path1	TRINITY_DN3541_c0_g1_i4.path2	TRINITY_DN17850_c2_g1_i1.path1	novel.308
TRINITY_DN46317_c0_g1_i1.path2	novel.1783	TRINITY_DN11435_c0_g1_i6.path1	novel.6855	novel.4284
TRINITY_DN42872_c0_g1_i1.path1	TRINITY_DN13432_c0_g1_i1.path1	Pepsico2_Contig20050.path1	novel.10147	TRINITY_DN19482_c0_g1_i2.path1
novel.324	TRINITY_DN89_c0_g1_i9.path1	TRINITY_DN19834_c0_g1_i3.path2	novel.9972	Pepsico1_Contig35398.path1
novel.7251	TRINITY_DN3216_c0_g1_i3.path2	TRINITY_DN37599_c0_g1_i2.path1	TRINITY_DN12062_c0_g3_i1.path1	novel.3027
novel.1419	novel.1070	TRINITY_DN5351_c0_g2_i1.path1	TRINITY_DN13842_c0_g2_i2.path1	novel.2777
novel.1690	TRINITY_DN22824_c0_g1_i2.path1	TRINITY_DN29163_c0_g5_i1.path1	novel.8055	novel.1461
Pepsico2_Contig18201.path1	novel.3530	Pepsico2_Contig12433.path2	TRINITY_DN14685_c0_g1_i1.path1	novel.1688
TRINITY_DN13856_c2_g1_i1.path2	Pepsico1_Contig2484.path1	Pepsico2_Contig20717.path1	novel.10223	TRINITY_DN10620_c0_g1_i4.path1
TRINITY_DN21382_c1_g1_i1.path1	TRINITY_DN1669_c0_g1_i8.path1	TRINITY_DN1543_c0_g1_i1.path1	TRINITY_DN727_c0_g3_i1.path2	TRINITY_DN72039_c0_g1_i1.path1
TRINITY_DN25377_c0_g1_i2.path1	novel.8437	novel.3265	novel.5964	novel.3169
novel.10067	TRINITY_DN5091_c1_g2_i1.path1	novel.5882	novel.10115	Pepsico2_Contig12311.path1
novel.3110	Pepsico2_Contig19388.path2	TRINITY_DN30743_c0_g1_i1.path1	TRINITY_DN16719_c1_g2_i2.path3	TRINITY_DN27741_c0_g1_i1.path1
novel.4486	TRINITY_DN91480_c0_g1_i1.path1	TRINITY_DN2_c0_g3_i1.path1	novel.299	Pepsico2_Contig7855.path1
novel.10537	TRINITY_DN92594_c0_g1_i1.path1	novel.2881	novel.9940	novel.6793
TRINITY_DN107476_c0_g1_i1.path1	novel.2553	TRINITY_DN11475_c0_g5_i1.path1	novel.2530	novel.4731
Pepsico2_Contig14533.path1	Pepsico2_Contig15057.path1	TRINITY_DN92594_c0_g1_i1.path1	TRINITY_DN4463_c2_g2_i2.path3	TRINITY_DN1212_c0_g1_i1.path1
TRINITY_DN27741_c0_g1_i1.path1	Pepsico2_Contig18169.path2	TRINITY_DN89_c0_g1_i9.path1	Pepsico2_Contig7639.path1	Pepsico1_Contig2444.path1
novel.1475	novel.2139	TRINITY_DN26545_c0_g1_i1.path2	novel.2881	TRINITY_DN24505_c0_g1_i1.path1
novel.3655	TRINITY_DN102490_c0_g1_i1.path2	Pepsico2_Contig10332.path1	novel.8195	novel.10344
novel.2890	Pepsico2_Contig10332.path1	novel.4345	TRINITY_DN6057_c0_g1_i2.path1	novel.4787
novel.2828	TRINITY_DN3393_c0_g1_i2.path1	Pepsico2_Contig12784.path1	novel.1384	novel.9332
novel.6823	novel.148	novel.1441	novel.5528	Pepsico2_Contig9966.path1
TRINITY_DN18327_c0_g4_i1.path1	Pepsico2_Contig1768.path1	Pepsico1_Contig294.path1	novel.9847	TRINITY_DN15963_c0_g1_i2.path2
TRINITY_DN17732_c0_g6_i1.path1	TRINITY_DN10252_c0_g1_i3.path2	novel.10055	TRINITY_DN26672_c1_g1_i7.path1	Pepsico1_Contig38302.path1
Pepsico2_Contig16242.path1	novel.5821	TRINITY_DN27981_c0_g1_i1.path1	Pepsico2_Contig11063.path1	novel.8582
TRINITY_DN15904_c0_g1_i9.path1	TRINITY_DN23841_c0_g1_i1.path1	Pepsico2_Contig7946.path1	novel.8673	novel.6110
Pepsico1_Contig6482.path2	novel.10116	novel.4814	novel.6787	TRINITY_DN91798_c0_g1_i1.path4
TRINITY_DN20486_c0_g1_i4.path1	TRINITY_DN42872_c0_g1_i1.path1	novel.8996	TRINITY_DN42792_c0_g4_i1.path1	novel.1093
novel.4507	TRINITY_DN17371_c0_g1_i18.path3	TRINITY_DN6605_c1_g1_i5.path2	novel.9397	TRINITY_DN39280_c0_g1_i6.path2
novel.10247	novel.6955	TRINITY_DN5245_c0_g1_i2.path1	TRINITY_DN34205_c0_g1_i1.path2	TRINITY_DN23959_c1_g1_i3.path1
novel.6807	TRINITY_DN10709_c0_g1_i3.path2	Pepsico2_Contig2081.path2	TRINITY_DN38837_c0_g2_i3.path1	TRINITY_DN27638_c0_g1_i9.path1
TRINITY_DN8715_c0_g1_i2.path2	Pepsico1_Contig6527.path2	novel.2134	Pepsico1_Contig3830.path1	TRINITY_DN7199_c0_g4_i2.path1
Pepsico2_Contig14383.path1	TRINITY_DN27300_c0_g1_i1.path2	novel.4204	novel.1836	novel.10139
novel.6502	novel.2890	Pepsico1_Contig24970.path1	Pepsico1_Contig14374.path1	TRINITY_DN24283_c0_g1_i2.path1
TRINITY_DN13645_c0_g2_i1.path2	TRINITY_DN18284_c0_g1_i2.path1	TRINITY_DN59894_c0_g1_i1.path1	novel.4577	TRINITY_DN90250_c0_g1_i1.path2
novel.2968	TRINITY_DN22664_c0_g1_i3.path1	novel.10085	TRINITY_DN6436_c0_g1_i2.path1	TRINITY_DN92594_c0_g1_i1.path1
Pepsico2_Contig11157.path1	TRINITY_DN18035_c0_g2_i2.path1	Pepsico2_Contig1933.path1	novel.7630	TRINITY_DN9350_c0_g1_i3.path1
TRINITY_DN8399_c2_g1_i1.path1	novel.133	TRINITY_DN9396_c0_g1_i1.path2	TRINITY_DN2111_c0_g1_i1.path1	Pepsico2_Contig12172.path1
TRINITY_DN8002_c0_g1_i1.path1	novel.7437	TRINITY_DN34430_c1_g1_i1.path1	TRINITY_DN14523_c0_g1_i1.path1	novel.1690
Pepsico2_Contig7372.path1	novel.8977	novel.9805	novel.1440	novel.1841
novel.6794	novel.7148	novel.5034	TRINITY_DN7127_c0_g1_i1.path1	TRINITY_DN8596_c0_g7_i1.path1
TRINITY_DN90454_c0_g1_i1.path1	TRINITY_DN56751_c0_g3_i1.path1	Pepsico1_Contig1082.path1	TRINITY_DN40924_c0_g1_i4.path1	novel.9809
novel.10251	novel.3765	Pepsico1_Contig4393.path1	TRINITY_DN39187_c0_g2_i1.path1	TRINITY_DN45842_c0_g1_i1.path2
Pepsico1_Contig38400.path1	TRINITY_DN26947_c0_g1_i2.path1	TRINITY_DN21334_c0_g1_i1.path2	Pepsico2_Contig7946.path1	Pepsico2_Contig15340.path1
TRINITY_DN97391_c0_g1_i1.path1	TRINITY_DN12218_c0_g1_i4.path1	TRINITY_DN21553_c0_g1_i5.path4	novel.7739	TRINITY_DN103146_c0_g1_i1.path1
TRINITY_DN12224_c0_g1_i6.path2	Pepsico1_Contig1382.path2	TRINITY_DN6470_c2_g1_i3.path2	novel.10180	novel.6665
novel.1386	novel.90	TRINITY_DN9899_c0_g1_i1.path1	TRINITY_DN3337_c1_g1_i2.path2	Pepsico1_Contig3168.path3
TRINITY_DN16211_c1_g1_i1.path1	TRINITY_DN16607_c0_g4_i3.path3	novel.8203	novel.5975	Pepsico2_Contig2246.path2
novel.2751	Pepsico2_Contig19542.path1	TRINITY_DN2294_c1_g3_i1.path2	novel.9476	Pepsico2_Contig8070.path3
novel.2886	TRINITY_DN3739_c0_g1_i2.path1	TRINITY_DN21346_c0_g1_i2.path1	novel.6806	novel.3646
TRINITY_DN7356_c0_g1_i8.path1	TRINITY_DN24214_c0_g2_i1.path1	novel.8504	novel.5633	TRINITY_DN9891_c0_g4_i1.path2
Pepsico1_Contig2142.path1	TRINITY_DN71897_c0_g1_i1.path3	Pepsico2_Contig19695.path1	novel.7732	novel.10107
novel.4006	TRINITY_DN8516_c0_g1_i1.path1	novel.356	Pepsico2_Contig16352.path2	Pepsico2_Contig20331.path1
TRINITY_DN53356_c0_g1_i3.path2	Pepsico2_Contig13314.path2	novel.7677	TRINITY_DN28406_c0_g1_i5.path1	TRINITY_DN31406_c0_g3_i1.path1
novel.148	novel.6586	TRINITY_DN20401_c0_g2_i1.path1	Pepsico2_Contig1052.path1	novel.8745
TRINITY_DN21106_c0_g1_i1.path2	Pepsico2_Contig16352.path2	novel.10551	novel.1935	novel.1476
novel.6104	novel.5005	novel.8387	Pepsico1_Contig2134.path1	novel.7119
Pepsico2_Contig27.path1	novel.3854	novel.7791	TRINITY_DN40419_c0_g1_i1.path1	TRINITY_DN20697_c0_g1_i3.path1
novel.7970	TRINITY_DN22428_c1_g1_i2.path1	novel.8232	novel.6382	novel.9815
novel.2782	Pepsico2_Contig12172.path1	TRINITY_DN24546_c0_g1_i1.path1	novel.8741	TRINITY_DN26345_c0_g1_i1.path1
novel.8818	TRINITY_DN19477_c0_g1_i2.path1	TRINITY_DN11737_c0_g2_i1.path1	novel.1919	Pepsico2_Contig12940.path1
TRINITY_DN27422_c0_g1_i2.path1	Pepsico1_Contig38302.path1	TRINITY_DN26719_c0_g1_i1.path1	novel.9867	TRINITY_DN13856_c2_g1_i1.path1
TRINITY_DN4942_c0_g1_i2.path2	novel.8991	novel.3824	TRINITY_DN15185_c0_g3_i5.path2	TRINITY_DN24113_c3_g2_i1.path1
TRINITY_DN45842_c0_g1_i1.path2	novel.6807	TRINITY_DN18610_c0_g2_i1.path1	Pepsico1_Contig1631.path1	Pepsico2_Contig9316.path1
novel.8582	novel.616	TRINITY_DN103146_c0_g1_i1.path1	novel.4003	novel.2927
TRINITY_DN13946_c0_g1_i2.path1	TRINITY_DN19341_c0_g1_i1.path2	novel.2781	Pepsico2_Contig3263.path1	TRINITY_DN958_c0_g2_i1.path1
novel.1783	novel.5271	TRINITY_DN60842_c0_g4_i3.path1	novel.9851	TRINITY_DN57575_c0_g1_i2.path2
TRINITY_DN23201_c0_g1_i2.path2	TRINITY_DN24316_c0_g1_i3.path1	novel.7044	TRINITY_DN39232_c0_g3_i1.path1	novel.2885
novel.1646	novel.4734	Pepsico1_Contig2546.path3	TRINITY_DN16607_c0_g4_i3.path3	novel.10573
TRINITY_DN10564_c1_g3_i3.path2	TRINITY_DN10564_c1_g2_i1.path1	Pepsico2_Contig10682.path1	novel.7428	novel.5592
novel.7456	TRINITY_DN2294_c1_g3_i1.path2	TRINITY_DN29296_c0_g1_i3.path1	novel.8145	novel.5907
Pepsico1_Contig27196.path1	TRINITY_DN21382_c1_g1_i1.path1	novel.1409	TRINITY_DN10442_c0_g1_i18.path2	TRINITY_DN7118_c1_g2_i1.path1
TRINITY_DN35686_c0_g2_i1.path1	TRINITY_DN25070_c0_g1_i1.path2	TRINITY_DN23579_c0_g1_i1.path1	TRINITY_DN31467_c1_g2_i2.path2	TRINITY_DN109695_c0_g1_i1.path1
novel.10052	TRINITY_DN3027_c0_g1_i4.path1	TRINITY_DN20293_c0_g1_i1.path1	novel.4576	novel.10075
TRINITY_DN26345_c0_g1_i1.path1	TRINITY_DN107476_c0_g1_i1.path1	novel.1397	Pepsico2_Contig12311.path1	TRINITY_DN21382_c1_g1_i1.path1
novel.9456	novel.8553	novel.8697	novel.10193	TRINITY_DN8575_c0_g2_i5.path2
TRINITY_DN9843_c0_g1_i3.path1	Pepsico2_Contig1209.path1	Pepsico2_Contig640.path1	Pepsico2_Contig4524.path2	novel.7026
novel.3665	TRINITY_DN15407_c0_g1_i3.path2	Pepsico2_Contig16986.path1	novel.6187	novel.4737
novel.1050	novel.8258	TRINITY_DN49192_c0_g1_i1.path2	TRINITY_DN20744_c0_g1_i2.path2	TRINITY_DN8002_c0_g1_i1.path1
TRINITY_DN5591_c0_g1_i3.path1	Pepsico2_Contig16837.path1	TRINITY_DN11367_c0_g1_i3.path1	TRINITY_DN12019_c0_g1_i3.path1	novel.9610
TRINITY_DN44309_c1_g1_i2.path1	novel.5316	novel.9826	novel.5180	Pepsico1_Contig25437.path1
TRINITY_DN115535_c0_g1_i1.path5	Pepsico2_Contig18212.path1	novel.5386	novel.4562	novel.10593
Pepsico2_Contig204.path2	TRINITY_DN7118_c1_g2_i1.path1	TRINITY_DN43286_c0_g1_i1.path1	TRINITY_DN13142_c0_g1_i3.path1	TRINITY_DN13856_c2_g1_i1.path2
TRINITY_DN34205_c0_g1_i1.path1	novel.7766	TRINITY_DN31074_c0_g1_i2.path2	novel.3970	novel.9410
novel.5255	TRINITY_DN20486_c0_g1_i4.path1	TRINITY_DN25304_c0_g1_i2.path2	TRINITY_DN44901_c0_g1_i1.path1	TRINITY_DN73325_c0_g1_i1.path1
novel.1464	TRINITY_DN8132_c0_g1_i1.path1	novel.1093	novel.10129	TRINITY_DN48283_c1_g1_i1.path1
novel.2079	Pepsico2_Contig13278.path1	TRINITY_DN50134_c0_g1_i1.path1	novel.1389	TRINITY_DN7981_c0_g2_i2.path1
novel.4211	TRINITY_DN9696_c0_g1_i1.path1	TRINITY_DN5346_c1_g1_i4.path1	novel.3586	Pepsico2_Contig14039.path1
novel.8553	novel.7790	novel.7790	Pepsico1_Contig211.path1	TRINITY_DN55418_c0_g1_i1.path1
TRINITY_DN91900_c0_g1_i1.path1	Pepsico2_Contig14796.path1	novel.8967	novel.6239	TRINITY_DN107396_c0_g1_i1.path1
TRINITY_DN19086_c0_g1_i2.path1	TRINITY_DN8013_c0_g1_i1.path1	Pepsico1_Contig2258.path1	novel.6611	TRINITY_DN12132_c0_g2_i1.path2
TRINITY_DN30963_c0_g1_i1.path1	novel.7927	TRINITY_DN12916_c0_g4_i1.path1	TRINITY_DN6181_c1_g1_i1.path1	Pepsico2_Contig19897.path2
TRINITY_DN42796_c0_g1_i4.path4	TRINITY_DN90250_c0_g1_i1.path2	novel.942	Pepsico1_Contig31918.path2	Pepsico2_Contig9193.path1
Pepsico1_Contig36.path1	novel.8292	TRINITY_DN5258_c0_g1_i20.path1	TRINITY_DN28718_c0_g1_i7.path2	novel.8019
novel.9815	novel.9751	Pepsico2_Contig13783.path2	TRINITY_DN7645_c0_g1_i2.path1	TRINITY_DN15235_c0_g1_i1.path2
novel.8258	novel.3655	novel.5524	TRINITY_DN16966_c0_g2_i1.path1	TRINITY_DN12620_c0_g1_i2.path3
TRINITY_DN73847_c0_g1_i1.path1	TRINITY_DN45954_c0_g1_i1.path1	Pepsico1_Contig16695.path1	novel.10296	novel.8198
TRINITY_DN13856_c2_g1_i1.path1	TRINITY_DN12224_c0_g1_i6.path2	TRINITY_DN9236_c0_g2_i5.path1	novel.10117	novel.2472
novel.10498	TRINITY_DN40411_c0_g1_i1.path1	Pepsico2_Contig12221.path2	novel.4172	TRINITY_DN6400_c0_g1_i1.path1
novel.8460	Pepsico2_Contig20717.path1	TRINITY_DN28718_c0_g1_i7.path2	novel.862	TRINITY_DN25481_c0_g1_i1.path1
novel.8718	novel.455	novel.6169	TRINITY_DN78657_c0_g1_i1.path1	Pepsico1_Contig5252.path1
TRINITY_DN32867_c0_g1_i1.path2	TRINITY_DN8094_c0_g1_i2.path1	TRINITY_DN23852_c0_g1_i1.path1	Pepsico2_Contig909.path1	TRINITY_DN8198_c0_g1_i2.path1
novel.1140	Pepsico1_Contig36039.path1	Pepsico2_Contig10142.path1	novel.7457	TRINITY_DN13615_c0_g1_i1.path1
TRINITY_DN92594_c0_g1_i1.path1	TRINITY_DN24150_c0_g2_i3.path2	TRINITY_DN24906_c0_g1_i3.path1	novel.3430	novel.2965
TRINITY_DN7118_c1_g2_i1.path1	TRINITY_DN24094_c0_g1_i2.path1	TRINITY_DN77785_c0_g1_i1.path2	TRINITY_DN64826_c0_g1_i1.path2	TRINITY_DN14890_c1_g1_i1.path1
Pepsico2_Contig7749.path1	novel.2527	novel.2619	TRINITY_DN27955_c0_g1_i1.path1	TRINITY_DN13858_c0_g1_i1.path1
TRINITY_DN15215_c0_g1_i1.path2	TRINITY_DN76869_c0_g1_i1.path1	TRINITY_DN8639_c0_g2_i1.path5	Pepsico2_Contig9798.path1	novel.10216
novel.356	TRINITY_DN40802_c0_g3_i1.path2	Pepsico2_Contig14557.path1	TRINITY_DN2194_c0_g1_i2.path1	novel.8099
TRINITY_DN98402_c0_g1_i1.path1	TRINITY_DN12747_c0_g1_i1.path1	novel.6106	TRINITY_DN5920_c1_g2_i3.path1	TRINITY_DN16565_c0_g1_i1.path1
TRINITY_DN48093_c0_g1_i1.path2	TRINITY_DN66659_c0_g1_i1.path1	TRINITY_DN16742_c0_g2_i1.path1	novel.10352	Pepsico2_Contig20667.path1
novel.2532	TRINITY_DN6942_c0_g1_i2.path1	TRINITY_DN44309_c1_g1_i2.path1	TRINITY_DN37599_c0_g1_i2.path1	Pepsico1_Contig3923.path1
novel.3090	Pepsico2_Contig12590.path1	novel.6586	TRINITY_DN71897_c0_g1_i1.path1	TRINITY_DN17371_c0_g1_i18.path3
TRINITY_DN37419_c0_g1_i1.path1	TRINITY_DN78221_c0_g1_i1.path1	Pepsico2_Contig9117.path1	TRINITY_DN18237_c1_g5_i1.path1	novel.5381
novel.6262	TRINITY_DN9079_c0_g1_i1.path1	TRINITY_DN56751_c0_g3_i1.path1	TRINITY_DN18091_c0_g1_i1.path1	novel.7251
novel.6103	novel.8056	novel.5907	novel.7650	Pepsico2_Contig1979.path1
novel.6376	novel.8099	novel.1387	novel.6473	novel.2139
TRINITY_DN7357_c0_g2_i1.path1	TRINITY_DN53636_c0_g1_i1.path1	TRINITY_DN3197_c0_g2_i1.path1	TRINITY_DN7072_c0_g2_i1.path1	TRINITY_DN15610_c0_g2_i1.path1
novel.6259	TRINITY_DN13856_c2_g1_i1.path1	novel.5856	TRINITY_DN13229_c0_g1_i1.path1	novel.7469
Pepsico1_Contig5630.path1	Pepsico2_Contig2160.path1	novel.9258	novel.9783	novel.4421
TRINITY_DN27698_c0_g1_i1.path2	TRINITY_DN27605_c0_g1_i2.path1	Pepsico1_Contig35386.path2	novel.5865	TRINITY_DN13444_c0_g1_i1.path1
TRINITY_DN44006_c0_g1_i1.path2	novel.3169	Pepsico2_Contig14014.path1	novel.10209	TRINITY_DN21078_c0_g3_i2.path1
TRINITY_DN88372_c0_g1_i1.path3	Pepsico2_Contig2387.path1	TRINITY_DN99434_c0_g1_i1.path1	novel.7514	novel.5213
novel.7083	Pepsico2_Contig14912.path1	novel.6807	TRINITY_DN3425_c0_g2_i1.path1	Pepsico1_Contig5480.path2
novel.2772	novel.4932	TRINITY_DN87711_c0_g1_i1.path1	novel.5276	TRINITY_DN17080_c0_g2_i1.path1
Pepsico1_Contig4093.path1	novel.1690	Pepsico2_Contig19542.path1	novel.4648	novel.7437
TRINITY_DN6400_c0_g1_i1.path1	TRINITY_DN5246_c0_g1_i1.path2	TRINITY_DN8509_c0_g1_i3.path1	TRINITY_DN26763_c0_g1_i1.path1	Pepsico2_Contig1209.path1
novel.6243	novel.6104	novel.3577	novel.2139	TRINITY_DN9236_c0_g2_i5.path1
novel.5664	TRINITY_DN8659_c0_g2_i1.path1	TRINITY_DN27308_c0_g1_i1.path1	TRINITY_DN14013_c0_g1_i2.path2	novel.356
novel.8941	novel.4706	Pepsico2_Contig6342.path1	Pepsico1_Contig13502.path1	Pepsico2_Contig9541.path1
novel.10504	TRINITY_DN13856_c2_g1_i1.path2	Pepsico2_Contig746.path1	TRINITY_DN54683_c0_g1_i3.path2	TRINITY_DN77785_c0_g1_i1.path2
novel.10064	TRINITY_DN71337_c0_g1_i1.path1	novel.2442	novel.4651	novel.4507
novel.2973	novel.2881	TRINITY_DN22428_c1_g1_i2.path1	TRINITY_DN36474_c0_g1_i4.path1	novel.1913
novel.7746	TRINITY_DN91900_c0_g1_i1.path1	novel.4361	TRINITY_DN49626_c0_g1_i1.path1	TRINITY_DN101536_c0_g1_i1.path1
novel.9782	novel.8591	novel.9833	TRINITY_DN12132_c0_g2_i1.path2	novel.3577
Pepsico1_Contig964.path1	TRINITY_DN17221_c0_g1_i5.path2	novel.4284	TRINITY_DN37162_c0_g1_i2.path2	Pepsico1_Contig1072.path1
TRINITY_DN34101_c0_g2_i1.path1	TRINITY_DN52375_c0_g1_i2.path1	TRINITY_DN12396_c0_g1_i1.path1	TRINITY_DN6605_c1_g2_i1.path1	novel.4164
TRINITY_DN34024_c0_g1_i1.path1	TRINITY_DN9421_c0_g1_i1.path1	novel.6105	Pepsico1_Contig32234.path1	TRINITY_DN69401_c0_g1_i1.path1
novel.10344	novel.6202	TRINITY_DN13491_c0_g1_i1.path4	Pepsico1_Contig4160.path1	Pepsico1_Contig36221.path1
novel.3854	TRINITY_DN9899_c0_g1_i1.path1	Pepsico2_Contig18421.path2	TRINITY_DN15823_c0_g3_i1.path1	novel.5042
novel.10061	TRINITY_DN16742_c0_g2_i1.path1	novel.10510	TRINITY_DN5144_c0_g1_i8.path2	Pepsico2_Contig5879.path1
TRINITY_DN15446_c0_g2_i1.path1	novel.10067	novel.9820	novel.6105	TRINITY_DN89_c0_g1_i9.path2
Pepsico1_Contig3168.path3	Pepsico2_Contig12871.path2	novel.5616	TRINITY_DN17603_c0_g2_i2.path1	TRINITY_DN40802_c0_g3_i1.path2
novel.656	TRINITY_DN19018_c0_g1_i1.path1	novel.9995	Pepsico2_Contig14892.path2	Pepsico2_Contig19194.path2
TRINITY_DN22824_c0_g1_i2.path1	TRINITY_DN56964_c0_g2_i1.path2	novel.4654	Pepsico1_Contig16695.path1	TRINITY_DN97688_c0_g1_i1.path1
novel.8232	TRINITY_DN27818_c0_g1_i1.path2	Pepsico1_Contig7017.path2	Pepsico2_Contig19672.path2	TRINITY_DN88734_c0_g1_i1.path1
TRINITY_DN28498_c0_g1_i7.path1	TRINITY_DN18442_c0_g1_i1.path1	novel.7766	TRINITY_DN15066_c0_g1_i2.path4	TRINITY_DN66806_c0_g1_i1.path1
TRINITY_DN33358_c0_g2_i1.path1	TRINITY_DN11842_c0_g1_i1.path1	Pepsico2_Contig13659.path1	novel.1140	TRINITY_DN2266_c0_g1_i4.path2
TRINITY_DN86693_c0_g1_i1.path1	TRINITY_DN48907_c0_g1_i1.path2	novel.1916	novel.5253	novel.10551
novel.5457	Pepsico2_Contig19574.path1	Pepsico2_Contig7855.path1	novel.2156	Pepsico1_Contig36264.path1
TRINITY_DN30064_c0_g3_i2.path3	Pepsico2_Contig14557.path1	TRINITY_DN21003_c1_g1_i7.path2	novel.10157	TRINITY_DN13490_c0_g1_i5.path1
novel.4719	TRINITY_DN6405_c0_g1_i7.path2	TRINITY_DN48822_c0_g1_i2.path1	novel.133	Pepsico1_Contig51.path1
TRINITY_DN41201_c0_g1_i1.path2	novel.3408	TRINITY_DN11187_c0_g1_i1.path1	novel.10170	Pepsico2_Contig14026.path1
TRINITY_DN7691_c0_g1_i1.path1	TRINITY_DN17358_c1_g3_i2.path1	Pepsico2_Contig20218.path1	novel.10088	novel.282
novel.4814	TRINITY_DN12396_c0_g1_i1.path1	novel.133	novel.6781	TRINITY_DN34220_c0_g2_i3.path1
novel.8591	TRINITY_DN16098_c0_g1_i3.path1	novel.33	Pepsico2_Contig16780.path1	Pepsico1_Contig8378.path2
novel.6115	TRINITY_DN36833_c1_g1_i1.path1	novel.342	TRINITY_DN6605_c1_g4_i2.path1	TRINITY_DN64775_c0_g1_i1.path1
TRINITY_DN20960_c0_g1_i1.path2	novel.4755	novel.10224	TRINITY_DN63686_c0_g1_i1.path2	TRINITY_DN608_c3_g1_i1.path3
Pepsico2_Contig19467.path2	Pepsico1_Contig4399.path1	novel.9881	Pepsico2_Contig8228.path1	novel.10064
Pepsico2_Contig1071.path1	novel.8184	TRINITY_DN1543_c0_g1_i1.path2	Pepsico1_Contig26654.path1	Pepsico2_Contig14861.path1
novel.3815	novel.5653	TRINITY_DN27605_c0_g1_i2.path1	novel.5250	TRINITY_DN11190_c5_g1_i1.path1
Pepsico2_Contig20105.path1	TRINITY_DN7651_c0_g1_i4.path1	novel.9751	Pepsico1_Contig11308.path2	TRINITY_DN97549_c0_g1_i1.path1
TRINITY_DN32868_c0_g1_i1.path2	Pepsico2_Contig640.path1	TRINITY_DN5669_c0_g1_i1.path1	novel.10555	TRINITY_DN26200_c0_g1_i1.path1
TRINITY_DN35560_c0_g1_i1.path4	novel.3671	TRINITY_DN7691_c0_g2_i1.path1	Pepsico2_Contig4727.path1	novel.2436
novel.2878	novel.5987	novel.7095	novel.8322	novel.4404
novel.1349	novel.3428	TRINITY_DN13305_c0_g1_i1.path1	TRINITY_DN32347_c0_g2_i2.path1	TRINITY_DN8771_c0_g1_i1.path1
TRINITY_DN47298_c0_g3_i1.path1	TRINITY_DN14943_c0_g1_i1.path1	novel.656	novel.4200	TRINITY_DN52145_c0_g1_i1.path2
Pepsico1_Contig3350.path2	TRINITY_DN79503_c0_g1_i1.path1	Pepsico2_Contig20227.path3	Pepsico2_Contig2408.path4	TRINITY_DN42872_c0_g1_i1.path1
TRINITY_DN24316_c0_g1_i3.path1	Pepsico2_Contig10795.path1	TRINITY_DN1030_c0_g1_i11.path1	TRINITY_DN9504_c0_g1_i1.path1	TRINITY_DN31281_c0_g1_i2.path1
TRINITY_DN10283_c0_g1_i4.path2	Pepsico2_Contig18201.path1	TRINITY_DN98903_c0_g1_i1.path1	novel.4643	Pepsico1_Contig4169.path1
novel.583	Pepsico2_Contig7855.path1	novel.8659	Pepsico1_Contig1577.path1	TRINITY_DN11414_c1_g1_i1.path1
novel.6036	TRINITY_DN25481_c0_g1_i1.path1	TRINITY_DN88045_c0_g1_i1.path1	TRINITY_DN35429_c0_g1_i1.path2	novel.9406
TRINITY_DN2294_c1_g3_i1.path2	TRINITY_DN3493_c0_g1_i3.path1	novel.2532	novel.6114	novel.6094
novel.8184	novel.8504	Pepsico2_Contig9123.path2	novel.455	TRINITY_DN17069_c0_g1_i1.path1
TRINITY_DN56964_c0_g2_i1.path2	TRINITY_DN20837_c0_g1_i1.path2	Pepsico2_Contig10474.path1	Pepsico2_Contig19872.path1	TRINITY_DN14623_c0_g1_i1.path1
novel.10297	TRINITY_DN24494_c0_g2_i1.path3	Pepsico2_Contig3282.path1	novel.2735	Pepsico1_Contig244.path1
novel.1074	TRINITY_DN14890_c1_g1_i1.path1	TRINITY_DN30535_c3_g1_i1.path1	TRINITY_DN39067_c0_g1_i1.path1	novel.2800
TRINITY_DN9129_c0_g1_i1.path2	novel.10009	Pepsico2_Contig12543.path1	novel.1377	TRINITY_DN4456_c0_g1_i1.path4
novel.9720	TRINITY_DN5337_c0_g1_i4.path2	novel.1693	novel.1419	TRINITY_DN70282_c0_g1_i1.path1
Pepsico2_Contig10468.path1	TRINITY_DN41090_c0_g1_i2.path2	TRINITY_DN33054_c1_g1_i1.path1	TRINITY_DN9230_c0_g1_i2.path2	novel.1478
TRINITY_DN8636_c1_g1_i5.path2	TRINITY_DN1462_c0_g4_i1.path1	novel.2645	Pepsico2_Contig9316.path1	TRINITY_DN14213_c0_g1_i11.path1
novel.4163	novel.1093	TRINITY_DN27638_c0_g1_i9.path1	TRINITY_DN9396_c0_g1_i1.path2	TRINITY_DN102490_c0_g1_i1.path2
Pepsico2_Contig16837.path1	novel.868	novel.1114	Pepsico2_Contig8070.path3	TRINITY_DN22613_c0_g1_i2.path1
Pepsico2_Contig9193.path1	Pepsico2_Contig13783.path2	Pepsico1_Contig7054.path2	novel.9843	novel.2886
TRINITY_DN12888_c1_g1_i3.path1	Pepsico1_Contig52.path2	Pepsico2_Contig14026.path1	TRINITY_DN37365_c0_g2_i3.path5	Pepsico2_Contig512.path1
TRINITY_DN6405_c0_g1_i7.path2	TRINITY_DN8283_c0_g1_i1.path1	Pepsico1_Contig3357.path1	novel.8341	TRINITY_DN3857_c0_g2_i1.path2
Pepsico2_Contig11083.path1	TRINITY_DN32096_c0_g1_i1.path1	novel.5774	Pepsico2_Contig17807.path1	novel.6243
novel.4585	Pepsico2_Contig9211.path2	novel.8188	novel.90	TRINITY_DN89_c0_g1_i9.path1
TRINITY_DN40653_c0_g1_i1.path1	novel.6105	TRINITY_DN29938_c0_g1_i1.path1	novel.5828	TRINITY_DN28071_c0_g1_i4.path1
novel.8939	novel.5147	TRINITY_DN11608_c0_g3_i3.path1	novel.7351	Pepsico2_Contig13278.path1
novel.2139	novel.2138	TRINITY_DN108478_c0_g1_i1.path4	TRINITY_DN8230_c1_g1_i1.path1	novel.6115
Pepsico2_Contig5229.path1	TRINITY_DN10605_c0_g1_i2.path1	TRINITY_DN19173_c0_g1_i3.path2	TRINITY_DN12067_c0_g1_i2.path2	TRINITY_DN1564_c1_g1_i2.path2
TRINITY_DN8893_c0_g1_i7.path1	novel.4787	Pepsico2_Contig12548.path1	TRINITY_DN17990_c0_g1_i15.path1	TRINITY_DN45570_c0_g1_i1.path1
novel.4583	novel.10075	TRINITY_DN22311_c0_g1_i7.path1	Pepsico2_Contig10706.path1	TRINITY_DN20793_c0_g1_i2.path1
Pepsico2_Contig15621.path1	novel.9995	TRINITY_DN29073_c0_g1_i3.path2	TRINITY_DN1195_c0_g5_i1.path1	TRINITY_DN28393_c0_g1_i1.path1
TRINITY_DN97655_c0_g1_i1.path2	TRINITY_DN16397_c0_g1_i4.path3	TRINITY_DN24094_c0_g1_i2.path1	novel.2968	TRINITY_DN21826_c0_g1_i1.path1
TRINITY_DN17466_c0_g1_i1.path1	TRINITY_DN47982_c0_g1_i1.path1	TRINITY_DN17371_c0_g2_i2.path4	TRINITY_DN33717_c1_g2_i3.path1	TRINITY_DN10718_c0_g2_i1.path1
TRINITY_DN42306_c0_g1_i3.path2	TRINITY_DN97391_c0_g1_i1.path1	novel.5916	TRINITY_DN69869_c0_g1_i1.path1	novel.4247
TRINITY_DN9952_c0_g3_i1.path2	TRINITY_DN4289_c0_g2_i1.path2	novel.5271	novel.7731	TRINITY_DN4973_c2_g1_i1.path1
TRINITY_DN7406_c1_g1_i1.path1	Pepsico2_Contig5179.path1	novel.8976	TRINITY_DN15693_c0_g1_i6.path1	novel.9782
novel.4555	TRINITY_DN32690_c0_g2_i1.path1	novel.8258	TRINITY_DN21826_c0_g1_i1.path1	Pepsico2_Contig20597.path2
novel.7689	TRINITY_DN56070_c0_g1_i1.path1	TRINITY_DN17019_c5_g1_i1.path1	novel.3646	TRINITY_DN31052_c0_g2_i1.path1
TRINITY_DN56541_c0_g1_i1.path3	TRINITY_DN11187_c0_g1_i1.path1	novel.9955	novel.342	novel.10498
Pepsico1_Contig725.path1	novel.3956	novel.3012	novel.6259	TRINITY_DN63686_c0_g1_i1.path2
TRINITY_DN45534_c0_g1_i1.path2	TRINITY_DN33691_c0_g1_i1.path1	novel.7469	Pepsico1_Contig3671.path2	novel.2973
TRINITY_DN48874_c0_g1_i2.path3	novel.4161	TRINITY_DN12620_c0_g1_i2.path3	TRINITY_DN17358_c1_g2_i4.path1	Pepsico2_Contig12213.path2
Pepsico2_Contig37.path1	novel.8125	TRINITY_DN17221_c0_g1_i5.path2	novel.2990	TRINITY_DN65_c0_g2_i1.path1
Pepsico1_Contig33771.path1	Pepsico1_Contig22407.path1	TRINITY_DN16102_c0_g1_i2.path2	novel.6715	TRINITY_DN32541_c0_g1_i1.path1
TRINITY_DN15963_c0_g1_i2.path2	Pepsico2_Contig6151.path2	novel.9782	TRINITY_DN9312_c0_g1_i4.path2	TRINITY_DN12256_c0_g1_i2.path2
novel.4284	TRINITY_DN77785_c0_g1_i1.path2	TRINITY_DN21382_c1_g1_i1.path1	novel.5882	TRINITY_DN80453_c0_g1_i1.path1
TRINITY_DN9370_c0_g2_i1.path1	novel.6260	TRINITY_DN17358_c1_g3_i2.path1	Pepsico2_Contig16986.path1	novel.3797
TRINITY_DN29289_c0_g1_i1.path1	TRINITY_DN11367_c0_g1_i3.path1	TRINITY_DN14491_c0_g1_i4.path1	TRINITY_DN7651_c0_g1_i4.path1	novel.4595
novel.9406	novel.9858	novel.9905	Pepsico2_Contig14411.path2	novel.4437
novel.4272	novel.3002	novel.10071	TRINITY_DN98903_c0_g1_i1.path1	novel.10052
novel.1397	novel.10551	Pepsico2_Contig18201.path1	Pepsico2_Contig18670.path1	TRINITY_DN45843_c0_g1_i1.path2
TRINITY_DN2800_c1_g1_i1.path5	TRINITY_DN7199_c0_g4_i2.path1	novel.10075	novel.10237	TRINITY_DN11475_c0_g5_i1.path1
novel.1046	novel.8188	Pepsico2_Contig1768.path1	TRINITY_DN25788_c0_g1_i1.path2	Pepsico2_Contig10736.path1
TRINITY_DN2451_c0_g1_i3.path1	novel.8130	TRINITY_DN10070_c0_g2_i4.path1	TRINITY_DN14386_c0_g1_i3.path1	TRINITY_DN15776_c0_g2_i1.path3
TRINITY_DN10664_c1_g6_i1.path3	TRINITY_DN25195_c0_g1_i1.path1	TRINITY_DN2504_c2_g1_i1.path3	TRINITY_DN26719_c0_g1_i1.path1	TRINITY_DN44861_c0_g1_i1.path1
TRINITY_DN5258_c0_g1_i20.path1	TRINITY_DN25015_c0_g1_i1.path1	TRINITY_DN27978_c0_g2_i1.path1	novel.2911	TRINITY_DN42523_c0_g1_i1.path2
novel.4569	Pepsico2_Contig12616.path1	TRINITY_DN14890_c1_g1_i1.path1	TRINITY_DN610_c0_g3_i2.path1	TRINITY_DN13491_c0_g1_i1.path4
TRINITY_DN7772_c0_g2_i1.path2	TRINITY_DN105904_c0_g1_i1.path3	novel.2973	novel.4371	TRINITY_DN5091_c1_g2_i1.path1
novel.7463	novel.2772	TRINITY_DN10796_c0_g1_i1.path1	Pepsico1_Contig1082.path1	TRINITY_DN8639_c0_g2_i1.path5
novel.9610	novel.1616	Pepsico2_Contig14269.path1	TRINITY_DN60693_c0_g1_i7.path2	TRINITY_DN6047_c1_g1_i1.path1
novel.7791	TRINITY_DN7448_c0_g1_i5.path1	TRINITY_DN24001_c0_g1_i1.path1	TRINITY_DN8826_c1_g6_i1.path4	novel.4023
Pepsico1_Contig1764.path1	novel.8232	TRINITY_DN25759_c0_g1_i1.path1	Pepsico2_Contig4420.path1	novel.2782
novel.10124	TRINITY_DN57575_c0_g1_i2.path2	TRINITY_DN7356_c0_g1_i8.path1	novel.3013	TRINITY_DN11431_c0_g1_i1.path2
TRINITY_DN11187_c0_g1_i1.path1	novel.7218	novel.9817	novel.4654	TRINITY_DN9_c0_g1_i1.path1
novel.1479	novel.2807	TRINITY_DN9421_c0_g2_i6.path1	TRINITY_DN10633_c0_g1_i1.path1	novel.6036
novel.9281	TRINITY_DN8636_c1_g1_i5.path2	novel.10258	Pepsico2_Contig12548.path1	TRINITY_DN25394_c0_g1_i3.path1
TRINITY_DN11190_c5_g1_i1.path1	novel.33	Pepsico2_Contig16540.path1	Pepsico2_Contig2456.path1	Pepsico1_Contig32540.path1
novel.259	novel.7689	Pepsico2_Contig12058.path1	TRINITY_DN1623_c1_g1_i8.path2	novel.2881
TRINITY_DN8138_c1_g1_i1.path1	Pepsico1_Contig33634.path1	novel.862	novel.1691	TRINITY_DN26834_c1_g1_i1.path1
novel.314	novel.3990	novel.10116	novel.8690	Pepsico2_Contig2890.path1
Pepsico2_Contig16992.path1	TRINITY_DN5591_c0_g1_i3.path2	TRINITY_DN19834_c0_g1_i3.path1	novel.4274	Pepsico2_Contig14724.path4
Pepsico1_Contig26224.path2	novel.7968	novel.6104	Pepsico2_Contig4743.path1	Pepsico2_Contig10651.path1
TRINITY_DN10252_c0_g1_i3.path2	novel.2645	novel.2007	TRINITY_DN26083_c0_g1_i3.path1	novel.4578
TRINITY_DN107810_c0_g1_i1.path2	novel.4272	novel.868	novel.10363	TRINITY_DN15610_c0_g1_i1.path1
novel.7475	TRINITY_DN2867_c0_g1_i4.path2	Pepsico2_Contig13889.path2	TRINITY_DN17270_c0_g1_i3.path2	Pepsico2_Contig1590.path1
Pepsico1_Contig847.path1	TRINITY_DN11431_c0_g1_i1.path2	TRINITY_DN15668_c0_g2_i1.path1	novel.10251	TRINITY_DN18977_c0_g1_i1.path1
Pepsico1_Contig2831.path1	novel.10202	Pepsico2_Contig18606.path1	Pepsico2_Contig14293.path1	TRINITY_DN1146_c1_g1_i1.path1
novel.1344	novel.10052	Pepsico2_Contig9193.path1	novel.5027	novel.4451
TRINITY_DN45155_c0_g1_i1.path2	novel.6103	TRINITY_DN7691_c1_g1_i3.path1	novel.1104	TRINITY_DN21218_c0_g2_i1.path2
Pepsico2_Contig10491.path1	TRINITY_DN23579_c0_g1_i1.path1	TRINITY_DN7651_c0_g1_i4.path1	TRINITY_DN1258_c0_g7_i1.path1	TRINITY_DN18324_c0_g1_i1.path2
Pepsico1_Contig37404.path1	TRINITY_DN23206_c0_g1_i2.path1	novel.4783	Pepsico1_Contig2110.path2	TRINITY_DN8779_c0_g2_i3.path2
novel.5524	TRINITY_DN11302_c0_g1_i3.path1	novel.8971	novel.2436	novel.4969
TRINITY_DN2294_c0_g2_i1.path1	Pepsico2_Contig457.path1	TRINITY_DN44615_c1_g1_i1.path1	TRINITY_DN26458_c0_g1_i1.path1	TRINITY_DN2417_c4_g1_i1.path1
novel.2919	TRINITY_DN33358_c0_g2_i1.path1	novel.4272	TRINITY_DN62941_c0_g1_i1.path1	TRINITY_DN91302_c0_g1_i1.path1
Pepsico2_Contig10332.path1	novel.5890	Pepsico2_Contig1209.path1	TRINITY_DN15235_c0_g1_i1.path2	novel.4786
TRINITY_DN37492_c0_g1_i1.path1	novel.4578	Pepsico2_Contig426.path2	novel.10507	Pepsico2_Contig4727.path1
Pepsico2_Contig16917.path2	novel.9411	Pepsico1_Contig2960.path1	Pepsico1_Contig1331.path2	novel.6122
novel.2140	Pepsico2_Contig1792.path1	Pepsico1_Contig106.path1	TRINITY_DN11709_c0_g1_i4.path2	novel.946
novel.4275	TRINITY_DN101536_c0_g1_i1.path1	Pepsico2_Contig19223.path1	novel.4645	Pepsico2_Contig14938.path1
TRINITY_DN19477_c0_g1_i2.path1	novel.4714	novel.7364	novel.9833	TRINITY_DN55353_c0_g1_i2.path1
Pepsico1_Contig35948.path1	novel.6808	TRINITY_DN12747_c0_g1_i1.path1	Pepsico2_Contig17141.path3	Pepsico2_Contig5686.path1
TRINITY_DN24782_c0_g1_i1.path2	TRINITY_DN8399_c2_g1_i1.path1	Pepsico2_Contig9211.path2	novel.4734	novel.8976
novel.4248	TRINITY_DN28365_c0_g1_i3.path1	TRINITY_DN18442_c0_g1_i1.path1	novel.1151	TRINITY_DN8916_c1_g2_i1.path1
TRINITY_DN25070_c0_g1_i1.path1	TRINITY_DN102242_c0_g1_i1.path5	novel.10519	novel.313	TRINITY_DN6181_c1_g1_i1.path1
novel.2800	novel.4111	novel.8359	novel.10297	novel.10512
TRINITY_DN54221_c0_g1_i1.path2	TRINITY_DN32510_c0_g1_i1.path1	novel.8238	TRINITY_DN10806_c1_g1_i1.path1	TRINITY_DN12502_c0_g5_i1.path1
novel.1409	novel.4786	novel.10043	TRINITY_DN17358_c1_g3_i2.path1	novel.8966
Pepsico1_Contig10997.path1	Pepsico2_Contig10706.path1	TRINITY_DN45102_c0_g1_i3.path1	TRINITY_DN14976_c1_g2_i1.path1	TRINITY_DN28038_c0_g1_i1.path1
novel.3199	novel.4507	novel.6095	Pepsico2_Contig14724.path4	TRINITY_DN17256_c1_g2_i2.path1
novel.8161	novel.8968	novel.8262	novel.515	novel.2368
Pepsico2_Contig5923.path1	novel.4462	Pepsico2_Contig16877.path1	TRINITY_DN6605_c1_g1_i5.path2	Pepsico1_Contig7942.path1
TRINITY_DN12396_c0_g1_i1.path1	novel.5386	novel.9847	TRINITY_DN108772_c0_g1_i1.path1	TRINITY_DN114157_c0_g1_i1.path1
TRINITY_DN5968_c0_g1_i3.path1	novel.9817	Pepsico2_Contig11289.path2	TRINITY_DN5346_c1_g1_i4.path1	TRINITY_DN46281_c0_g1_i1.path3
TRINITY_DN115202_c0_g1_i1.path1	novel.5416	TRINITY_DN13917_c0_g1_i1.path1	novel.2455	novel.5250
Pepsico2_Contig17223.path2	novel.5776	Pepsico2_Contig14959.path1	TRINITY_DN10049_c0_g1_i6.path1	TRINITY_DN14439_c0_g2_i1.path1
novel.5890	Pepsico1_Contig964.path1	novel.5316	novel.5613	TRINITY_DN7127_c0_g1_i1.path1
TRINITY_DN14979_c0_g1_i6.path1	Pepsico1_Contig822.path1	novel.7130	Pepsico2_Contig20331.path1	TRINITY_DN33848_c0_g1_i2.path2
TRINITY_DN13491_c0_g1_i1.path4	novel.2260	novel.7746	Pepsico1_Contig26224.path2	novel.4783
TRINITY_DN39067_c0_g1_i1.path1	TRINITY_DN31074_c0_g1_i2.path2	Pepsico1_Contig216.path2	Pepsico1_Contig2552.path1	Pepsico1_Contig3775.path1
novel.8918	novel.7563	novel.2494	novel.10224	TRINITY_DN10806_c1_g2_i8.path2
TRINITY_DN85368_c0_g1_i1.path1	novel.309	TRINITY_DN7983_c0_g1_i3.path2	Pepsico2_Contig1864.path1	novel.1384
novel.7610	TRINITY_DN5964_c0_g1_i2.path1	TRINITY_DN14386_c0_g1_i3.path1	novel.6218	Pepsico2_Contig9211.path2
TRINITY_DN85815_c0_g1_i1.path2	novel.1410	novel.2473	novel.5592	novel.10137
TRINITY_DN4402_c0_g1_i5.path3	Pepsico2_Contig11822.path2	TRINITY_DN20542_c1_g1_i1.path1	TRINITY_DN11234_c0_g2_i1.path1	TRINITY_DN6605_c1_g1_i5.path2
novel.5861	novel.5323	TRINITY_DN3582_c0_g1_i2.path2	novel.1443	TRINITY_DN5662_c0_g1_i3.path1
Pepsico2_Contig9387.path2	TRINITY_DN18757_c0_g3_i1.path1	novel.8184	novel.9610	Pepsico2_Contig7702.path1
TRINITY_DN8500_c0_g1_i2.path1	TRINITY_DN4646_c1_g1_i1.path1	Pepsico2_Contig14383.path1	TRINITY_DN111692_c0_g1_i1.path3	novel.8690
TRINITY_DN25015_c0_g1_i1.path1	TRINITY_DN33468_c0_g1_i2.path1	novel.1464	TRINITY_DN56621_c0_g2_i1.path1	novel.661
novel.7288	novel.5110	Pepsico2_Contig16837.path1	novel.4646	novel.148
TRINITY_DN30920_c0_g1_i2.path1	TRINITY_DN88372_c0_g1_i1.path3	Pepsico2_Contig4966.path2	TRINITY_DN24768_c0_g2_i1.path2	TRINITY_DN67089_c0_g1_i1.path2
Pepsico1_Contig1725.path1	novel.2494	TRINITY_DN14064_c0_g1_i2.path1	TRINITY_DN59894_c0_g1_i1.path1	novel.9321
TRINITY_DN16321_c0_g1_i8.path2	Pepsico1_Contig3671.path2	Pepsico2_Contig16355.path1	novel.3291	TRINITY_DN57243_c0_g1_i1.path3
TRINITY_DN2292_c0_g2_i1.path3	TRINITY_DN33717_c1_g2_i3.path1	Pepsico2_Contig13510.path1	novel.1536	Pepsico2_Contig9596.path1
novel.2186	TRINITY_DN1064_c0_g1_i2.path1	TRINITY_DN25195_c0_g1_i1.path1	novel.7742	TRINITY_DN8652_c0_g1_i6.path1
TRINITY_DN94055_c0_g1_i1.path2	novel.4214	TRINITY_DN8283_c0_g1_i1.path1	novel.9826	TRINITY_DN7176_c0_g2_i4.path1
novel.10557	TRINITY_DN18327_c0_g4_i1.path1	TRINITY_DN11475_c0_g6_i1.path1	novel.2738	TRINITY_DN18327_c0_g4_i1.path3
TRINITY_DN22361_c0_g1_i4.path1	TRINITY_DN8230_c1_g1_i1.path1	novel.4578	novel.6174	Pepsico2_Contig2590.path1
TRINITY_DN363_c0_g1_i5.path1	TRINITY_DN25377_c0_g1_i2.path1	TRINITY_DN43075_c0_g1_i2.path2	Pepsico2_Contig18289.path2	novel.5110
TRINITY_DN25481_c0_g1_i1.path1	TRINITY_DN97655_c0_g1_i1.path2	novel.7485	TRINITY_DN8013_c0_g1_i1.path1	TRINITY_DN8070_c0_g1_i2.path1
novel.2645	TRINITY_DN19341_c0_g1_i1.path1	TRINITY_DN8916_c1_g3_i1.path2	novel.1646	TRINITY_DN19890_c0_g1_i4.path1
Pepsico2_Contig13314.path2	TRINITY_DN107375_c0_g1_i1.path2	novel.4638	novel.4586	novel.7142
TRINITY_DN90250_c0_g1_i1.path2	Pepsico1_Contig3047.path3	Pepsico2_Contig15466.path2	novel.7309	Pepsico1_Contig32245.path1
TRINITY_DN14219_c0_g1_i13.path2	TRINITY_DN98932_c0_g1_i1.path1	TRINITY_DN98062_c0_g1_i1.path1	TRINITY_DN115535_c0_g1_i1.path5	novel.10200
TRINITY_DN98932_c0_g1_i1.path1	novel.5451	TRINITY_DN32868_c0_g1_i1.path2	novel.4581	Pepsico2_Contig2113.path1
novel.5387	TRINITY_DN23116_c0_g1_i1.path1	novel.9233	novel.5826	Pepsico2_Contig14654.path1
Pepsico2_Contig13071.path1	TRINITY_DN26242_c0_g3_i1.path1	TRINITY_DN97391_c0_g1_i1.path1	novel.6095	novel.4026
novel.3345	TRINITY_DN40653_c0_g1_i1.path1	novel.1443	novel.10564	TRINITY_DN39682_c0_g2_i2.path1
TRINITY_DN16680_c1_g1_i1.path1	TRINITY_DN27339_c0_g1_i1.path1	TRINITY_DN27643_c0_g1_i3.path2	TRINITY_DN13332_c0_g1_i6.path1	TRINITY_DN11773_c0_g2_i1.path2
novel.4969	TRINITY_DN4781_c2_g1_i5.path1	novel.2140	TRINITY_DN7389_c2_g4_i2.path1	Pepsico1_Contig1809.path1
TRINITY_DN473_c2_g1_i2.path2	TRINITY_DN64711_c0_g1_i1.path1	TRINITY_DN43227_c1_g1_i2.path1	novel.2498	TRINITY_DN10416_c0_g3_i1.path1
novel.7998	TRINITY_DN16073_c0_g1_i2.path2	TRINITY_DN86693_c0_g1_i1.path1	novel.1442	Pepsico1_Contig14274.path2
TRINITY_DN30743_c0_g1_i1.path1	novel.8625	TRINITY_DN13229_c0_g1_i1.path1	TRINITY_DN17386_c0_g1_i6.path1	TRINITY_DN41072_c0_g1_i1.path1
Pepsico1_Contig36221.path1	novel.5475	Pepsico1_Contig4130.path1	Pepsico2_Contig16881.path1	TRINITY_DN25759_c0_g1_i1.path1
TRINITY_DN16272_c0_g1_i1.path1	TRINITY_DN32031_c0_g1_i1.path1	TRINITY_DN18372_c0_g1_i1.path2	Pepsico2_Contig13314.path2	novel.2345
novel.3796	novel.5050	TRINITY_DN42306_c0_g1_i3.path2	novel.7251	novel.1409
TRINITY_DN10397_c0_g1_i1.path1	novel.7142	TRINITY_DN16456_c0_g2_i15.path2	TRINITY_DN2_c0_g1_i2.path2	novel.6715
TRINITY_DN22311_c0_g1_i7.path1	novel.8996	TRINITY_DN12244_c1_g2_i1.path1	TRINITY_DN9300_c0_g1_i5.path3	TRINITY_DN828_c3_g1_i1.path2
TRINITY_DN17273_c0_g1_i1.path1	TRINITY_DN4849_c0_g3_i1.path1	TRINITY_DN12888_c1_g1_i3.path1	TRINITY_DN15251_c0_g1_i1.path2	TRINITY_DN107476_c0_g1_i1.path1
TRINITY_DN40695_c0_g2_i2.path1	TRINITY_DN11720_c0_g1_i3.path3	novel.1481	TRINITY_DN20837_c0_g1_i1.path2	TRINITY_DN91900_c0_g1_i1.path1
TRINITY_DN19935_c0_g3_i1.path1	Pepsico2_Contig12476.path2	Pepsico1_Contig516.path1	novel.10156	TRINITY_DN100023_c0_g1_i1.path2
TRINITY_DN1669_c0_g1_i8.path1	TRINITY_DN1014_c0_g1_i1.path1	TRINITY_DN63686_c0_g1_i1.path2	novel.3477	TRINITY_DN15904_c0_g1_i9.path1
TRINITY_DN5876_c0_g1_i1.path1	TRINITY_DN100588_c0_g1_i1.path1	TRINITY_DN6909_c0_g1_i6.path2	Pepsico2_Contig8796.path2	Pepsico2_Contig20541.path1
novel.8723	Pepsico1_Contig5649.path2	TRINITY_DN16045_c1_g1_i4.path2	Pepsico2_Contig12172.path1	TRINITY_DN26458_c0_g1_i1.path1
TRINITY_DN54317_c0_g1_i1.path2	TRINITY_DN56541_c0_g1_i1.path3	TRINITY_DN8636_c1_g1_i5.path2	TRINITY_DN17432_c0_g1_i2.path2	Pepsico2_Contig10750.path2
novel.7766	TRINITY_DN3582_c0_g1_i2.path2	novel.10162	novel.2007	novel.6753
novel.7364	Pepsico1_Contig2521.path2	TRINITY_DN61422_c1_g1_i1.path1	Pepsico1_Contig2216.path2	TRINITY_DN23475_c0_g1_i5.path2
novel.4376	TRINITY_DN54221_c0_g1_i1.path2	Pepsico1_Contig1872.path2	TRINITY_DN4798_c1_g1_i7.path2	TRINITY_DN12664_c0_g1_i3.path2
TRINITY_DN9421_c0_g1_i1.path1	TRINITY_DN82909_c0_g1_i1.path1	novel.4462	TRINITY_DN9412_c0_g3_i1.path1	TRINITY_DN7964_c0_g1_i2.path1
TRINITY_DN14972_c0_g1_i3.path1	Pepsico2_Contig15288.path1	TRINITY_DN38601_c0_g1_i1.path1	TRINITY_DN20748_c0_g2_i1.path1	TRINITY_DN17371_c0_g2_i2.path4
novel.2601	TRINITY_DN37492_c0_g1_i1.path1	TRINITY_DN40802_c0_g3_i1.path2	novel.6415	TRINITY_DN8893_c0_g1_i7.path1
novel.5316	novel.910	novel.6784	Pepsico2_Contig3417.path3	Pepsico1_Contig1214.path2
novel.8677	TRINITY_DN37089_c0_g1_i1.path1	Pepsico2_Contig4818.path1	novel.4638	TRINITY_DN26590_c0_g1_i1.path1
TRINITY_DN1030_c0_g1_i11.path1	novel.6722	TRINITY_DN5198_c0_g2_i1.path1	novel.5381	novel.7563
novel.785	novel.10206	Pepsico1_Contig25437.path1	Pepsico1_Contig526.path2	TRINITY_DN7989_c2_g1_i1.path1
novel.9596	TRINITY_DN71463_c0_g1_i1.path1	TRINITY_DN18284_c0_g1_i2.path1	TRINITY_DN2753_c0_g1_i1.path1	TRINITY_DN40809_c0_g1_i1.path1
TRINITY_DN24281_c0_g1_i3.path1	novel.1464	novel.10319	Pepsico2_Contig12701.path2	Pepsico2_Contig16355.path1
Pepsico2_Contig12399.path1	TRINITY_DN22120_c0_g1_i4.path1	TRINITY_DN42792_c0_g4_i1.path1	Pepsico2_Contig19956.path1	TRINITY_DN70348_c0_g1_i1.path1
TRINITY_DN23294_c0_g2_i1.path2	novel.9555	Pepsico2_Contig10800.path2	TRINITY_DN11522_c0_g1_i4.path2	novel.9837
novel.2055	TRINITY_DN7855_c0_g1_i1.path2	TRINITY_DN26591_c0_g2_i3.path1	novel.3027	novel.6295
TRINITY_DN107375_c0_g1_i1.path2	TRINITY_DN60938_c0_g1_i1.path1	Pepsico1_Contig1338.path2	novel.4085	novel.1069
Pepsico2_Contig15621.path2	TRINITY_DN13491_c0_g1_i1.path4	TRINITY_DN28365_c0_g1_i3.path1	Pepsico2_Contig20050.path1	novel.6388
TRINITY_DN17168_c0_g5_i1.path1	novel.6867	TRINITY_DN4_c0_g1_i6.path1	novel.7970	TRINITY_DN16922_c0_g5_i1.path3
TRINITY_DN33408_c0_g1_i1.path1	TRINITY_DN5968_c0_g1_i3.path1	novel.193	Pepsico2_Contig11219.path2	novel.7075
novel.8551	novel.2554	novel.8582	novel.4595	novel.2703
Pepsico1_Contig7004.path1	novel.5717	novel.4720	TRINITY_DN4942_c0_g1_i2.path2	TRINITY_DN89960_c0_g1_i1.path1
TRINITY_DN4798_c1_g1_i7.path2	novel.1069	Pepsico1_Contig51.path1	novel.9955	novel.5975
TRINITY_DN52666_c0_g1_i1.path2	novel.1294	novel.4594	TRINITY_DN5732_c0_g1_i3.path2	TRINITY_DN15333_c0_g2_i1.path2
novel.1069	TRINITY_DN31232_c0_g2_i1.path1	TRINITY_DN881_c0_g1_i4.path1	TRINITY_DN1550_c3_g1_i2.path1	novel.7485
novel.10075	TRINITY_DN26952_c0_g1_i5.path2	TRINITY_DN13444_c0_g1_i1.path1	TRINITY_DN15087_c1_g1_i1.path1	novel.2878
novel.6304	Pepsico2_Contig16836.path1	Pepsico2_Contig7369.path1	TRINITY_DN6533_c0_g1_i1.path1	novel.1854
novel.1139	novel.7791	TRINITY_DN8457_c0_g1_i1.path2	Pepsico1_Contig35386.path2	Pepsico2_Contig10468.path1
Pepsico2_Contig18606.path1	novel.1349	TRINITY_DN1212_c0_g1_i1.path1	TRINITY_DN11054_c1_g2_i2.path1	TRINITY_DN106575_c0_g1_i1.path1
novel.3478	Pepsico2_Contig4477.path1	TRINITY_DN13142_c0_g1_i3.path1	novel.2734	novel.293
TRINITY_DN19174_c0_g1_i1.path1	novel.6295	TRINITY_DN1446_c0_g1_i1.path2	novel.4699	novel.9853
novel.9687	TRINITY_DN8283_c0_g1_i1.path2	Pepsico2_Contig14494.path1	TRINITY_DN8779_c0_g2_i3.path2	novel.868
novel.7656	TRINITY_DN15078_c0_g1_i5.path1	novel.10057	TRINITY_DN35418_c0_g2_i1.path1	novel.1276
TRINITY_DN6082_c0_g2_i1.path1	TRINITY_DN79961_c0_g1_i1.path1	novel.1690	Pepsico1_Contig31538.path1	TRINITY_DN31089_c0_g1_i5.path2
novel.7707	TRINITY_DN8353_c0_g1_i1.path1	Pepsico2_Contig15761.path3	TRINITY_DN42395_c0_g1_i1.path1	Pepsico2_Contig4417.path1
Pepsico2_Contig13783.path2	novel.242	TRINITY_DN24494_c0_g2_i1.path3	novel.8996	TRINITY_DN114909_c0_g1_i1.path1
Pepsico2_Contig4727.path1	novel.1919	novel.9875	TRINITY_DN9377_c0_g5_i1.path1	novel.1915
Pepsico2_Contig12871.path2	novel.2640	TRINITY_DN6662_c0_g1_i6.path1	Pepsico2_Contig12616.path1	novel.6386
novel.4210	TRINITY_DN6860_c0_g1_i1.path1	TRINITY_DN18610_c0_g1_i2.path1	Pepsico2_Contig9341.path1	TRINITY_DN54317_c0_g1_i1.path2
Pepsico2_Contig12944.path2	TRINITY_DN11190_c5_g1_i1.path1	Pepsico2_Contig13035.path1	TRINITY_DN49776_c0_g1_i1.path3	TRINITY_DN62134_c2_g1_i1.path1
TRINITY_DN24777_c0_g1_i1.path1	Pepsico1_Contig1236.path1	Pepsico1_Contig33634.path1	Pepsico1_Contig3804.path1	TRINITY_DN7983_c0_g1_i3.path2
Pepsico1_Contig3146.path1	novel.9750	Pepsico2_Contig14999.path1	Pepsico1_Contig32100.path1	Pepsico2_Contig204.path2
novel.8019	TRINITY_DN14101_c0_g1_i8.path1	novel.3765	TRINITY_DN13351_c0_g1_i2.path2	TRINITY_DN70741_c0_g1_i1.path2
novel.2138	novel.172	novel.8099	TRINITY_DN10332_c0_g2_i2.path1	TRINITY_DN7448_c0_g1_i5.path1
TRINITY_DN12062_c0_g3_i1.path1	Pepsico2_Contig19763.path1	TRINITY_DN26039_c0_g1_i1.path1	TRINITY_DN17604_c0_g2_i4.path1	TRINITY_DN27300_c0_g1_i1.path2
novel.6287	TRINITY_DN19058_c0_g1_i1.path1	novel.282	Pepsico2_Contig19897.path2	novel.10313
novel.10085	Pepsico1_Contig2216.path2	novel.5935	novel.6245	novel.10069
novel.4980	TRINITY_DN12254_c0_g1_i1.path1	TRINITY_DN74_c0_g2_i1.path1	TRINITY_DN44615_c1_g2_i1.path1	TRINITY_DN37874_c0_g1_i1.path1
Pepsico1_Contig4464.path1	TRINITY_DN28317_c0_g1_i1.path1	TRINITY_DN10605_c0_g1_i2.path1	TRINITY_DN68988_c0_g1_i1.path2	Pepsico2_Contig7310.path1
TRINITY_DN99434_c0_g1_i1.path1	novel.9815	Pepsico1_Contig5029.path1	TRINITY_DN15668_c0_g2_i1.path1	Pepsico2_Contig17380.path1
novel.6114	TRINITY_DN18898_c0_g1_i1.path2	novel.4214	novel.10109	TRINITY_DN74265_c0_g1_i1.path1
Pepsico2_Contig2013.path3	Pepsico2_Contig6647.path1	novel.2757	novel.9990	TRINITY_DN6677_c0_g2_i2.path2
Pepsico1_Contig38215.path1	Pepsico1_Contig37173.path1	Pepsico2_Contig1790.path2	TRINITY_DN17070_c0_g2_i3.path1	TRINITY_DN5534_c0_g1_i1.path1
novel.5853	novel.4199	Pepsico2_Contig15227.path1	TRINITY_DN47897_c0_g1_i1.path1	TRINITY_DN7173_c0_g2_i1.path2
TRINITY_DN36833_c1_g1_i1.path1	Pepsico1_Contig514.path1	novel.4709	Pepsico2_Contig18919.path1	Pepsico2_Contig4300.path1
TRINITY_DN15140_c0_g1_i3.path2	novel.2140	TRINITY_DN110160_c0_g1_i1.path1	novel.4737	TRINITY_DN54221_c0_g1_i1.path2
TRINITY_DN18179_c0_g1_i5.path2	TRINITY_DN29533_c0_g1_i2.path2	TRINITY_DN12488_c0_g1_i5.path1	Pepsico2_Contig11358.path1	TRINITY_DN18809_c0_g1_i2.path1
novel.6384	novel.10319	Pepsico1_Contig3168.path3	TRINITY_DN31052_c0_g2_i1.path1	TRINITY_DN47348_c0_g1_i2.path1
Pepsico2_Contig12221.path2	TRINITY_DN29504_c0_g1_i2.path1	novel.7423	TRINITY_DN29776_c0_g2_i1.path1	novel.1194
Pepsico1_Contig33394.path1	novel.8364	novel.5845	novel.1783	Pepsico2_Contig3730.path1
Pepsico2_Contig14269.path1	TRINITY_DN30562_c0_g1_i1.path2	novel.8292	novel.6196	TRINITY_DN99713_c0_g1_i1.path1
TRINITY_DN17319_c0_g1_i7.path2	novel.6536	TRINITY_DN68988_c0_g1_i1.path2	TRINITY_DN27308_c0_g1_i1.path1	TRINITY_DN27295_c0_g1_i1.path1
Pepsico2_Contig2246.path2	novel.3093	Pepsico2_Contig11140.path1	TRINITY_DN27620_c0_g7_i1.path1	novel.10067
novel.10551	TRINITY_DN1621_c0_g2_i4.path1	novel.8966	novel.4814	TRINITY_DN98037_c0_g1_i1.path1
TRINITY_DN72514_c0_g1_i1.path1	Pepsico1_Contig6482.path2	Pepsico2_Contig1721.path1	TRINITY_DN13703_c0_g1_i2.path2	TRINITY_DN8916_c1_g3_i1.path2
novel.4729	TRINITY_DN71506_c0_g1_i1.path2	novel.6793	TRINITY_DN20047_c0_g2_i1.path2	TRINITY_DN11608_c0_g3_i3.path1
TRINITY_DN8070_c0_g1_i2.path1	novel.6121	TRINITY_DN115818_c0_g1_i1.path1	novel.2368	novel.7241
novel.3163	novel.5526	TRINITY_DN8174_c0_g1_i4.path1	novel.875	TRINITY_DN11586_c0_g2_i3.path1
novel.4249	TRINITY_DN20488_c0_g1_i4.path1	TRINITY_DN71027_c0_g1_i1.path1	novel.5531	novel.8262
novel.7499	TRINITY_DN70311_c0_g1_i1.path2	novel.2725	TRINITY_DN1594_c0_g1_i8.path1	novel.10034
TRINITY_DN4849_c0_g3_i1.path1	Pepsico2_Contig14014.path1	Pepsico2_Contig18136.path1	TRINITY_DN17893_c0_g1_i3.path1	Pepsico1_Contig1027.path1
Pepsico2_Contig12076.path1	TRINITY_DN15966_c0_g1_i1.path1	TRINITY_DN26026_c0_g1_i4.path1	novel.9946	novel.2260
novel.3973	TRINITY_DN29296_c0_g1_i3.path1	novel.9185	Pepsico2_Contig16466.path1	TRINITY_DN52113_c0_g1_i1.path3
TRINITY_DN32690_c0_g2_i1.path1	TRINITY_DN19720_c0_g1_i1.path1	novel.9815	TRINITY_DN44861_c0_g1_i1.path1	TRINITY_DN44188_c0_g1_i1.path1
TRINITY_DN91798_c0_g1_i1.path4	Pepsico2_Contig19415.path1	novel.10344	TRINITY_DN18898_c0_g1_i1.path2	TRINITY_DN31252_c0_g1_i4.path2
Pepsico1_Contig33565.path1	novel.9955	Pepsico2_Contig2033.path1	novel.6784	Pepsico2_Contig12544.path2
Pepsico2_Contig783.path1	novel.3147	novel.2469	novel.2781	novel.7689
Pepsico2_Contig7290.path1	novel.4345	Pepsico1_Contig38400.path1	TRINITY_DN4108_c0_g1_i5.path2	novel.4462
Pepsico1_Contig3412.path1	TRINITY_DN2292_c0_g2_i1.path3	Pepsico1_Contig2034.path2	TRINITY_DN28889_c0_g1_i2.path1	novel.351
TRINITY_DN20955_c0_g1_i1.path1	Pepsico2_Contig9720.path2	Pepsico1_Contig1331.path2	novel.1378	novel.6129
novel.5957	novel.1201	TRINITY_DN1457_c0_g2_i3.path1	TRINITY_DN66384_c0_g1_i1.path1	novel.10557
TRINITY_DN3618_c0_g1_i2.path1	novel.6966	TRINITY_DN6007_c0_g1_i6.path2	novel.2833	novel.5594
Pepsico2_Contig16540.path1	TRINITY_DN24777_c0_g1_i1.path1	TRINITY_DN8916_c1_g2_i1.path2	novel.3169	novel.6143
TRINITY_DN13991_c1_g1_i1.path1	TRINITY_DN6400_c0_g1_i1.path1	TRINITY_DN104848_c0_g1_i1.path3	TRINITY_DN4775_c0_g1_i1.path1	novel.94
Pepsico1_Contig36039.path1	TRINITY_DN22311_c0_g1_i7.path1	TRINITY_DN26947_c0_g1_i2.path1	novel.9771	TRINITY_DN71897_c0_g1_i1.path1
TRINITY_DN11431_c0_g1_i1.path2	TRINITY_DN10015_c0_g1_i1.path2	TRINITY_DN34297_c0_g1_i3.path1	TRINITY_DN1397_c0_g3_i1.path1	TRINITY_DN40581_c1_g1_i1.path2
novel.5530	TRINITY_DN8715_c0_g1_i2.path2	novel.1615	novel.1944	Pepsico2_Contig9685.path2
TRINITY_DN17069_c0_g1_i1.path1	TRINITY_DN45155_c0_g1_i1.path2	TRINITY_DN45954_c0_g1_i1.path1	Pepsico2_Contig19690.path1	novel.9875
Pepsico1_Contig1072.path1	novel.2856	novel.1919	novel.321	TRINITY_DN26751_c0_g1_i2.path2
novel.7485	Pepsico2_Contig9303.path1	Pepsico2_Contig16881.path1	TRINITY_DN37142_c0_g1_i1.path2	Pepsico2_Contig18169.path2
TRINITY_DN86499_c0_g1_i1.path1	TRINITY_DN3543_c0_g3_i1.path1	novel.10068	TRINITY_DN45102_c0_g1_i3.path1	TRINITY_DN14540_c1_g1_i1.path2
novel.9187	novel.7623	Pepsico2_Contig4524.path2	TRINITY_DN29504_c0_g1_i2.path1	novel.417
Pepsico2_Contig2160.path1	novel.7197	novel.4507	TRINITY_DN2140_c0_g2_i1.path1	TRINITY_DN23116_c0_g1_i1.path1
TRINITY_DN29504_c0_g1_i2.path1	novel.2154	Pepsico2_Contig18169.path2	TRINITY_DN9558_c0_g1_i5.path1	TRINITY_DN26591_c0_g2_i3.path1
novel.60	TRINITY_DN17692_c1_g1_i2.path1	novel.6652	Pepsico2_Contig19574.path1	TRINITY_DN16521_c0_g1_i1.path1
TRINITY_DN23360_c0_g1_i1.path3	novel.7997	Pepsico1_Contig6738.path1	Pepsico2_Contig12221.path2	novel.8521
TRINITY_DN11025_c0_g1_i4.path2	TRINITY_DN2504_c2_g1_i1.path3	novel.4335	novel.324	novel.2018
novel.6121	TRINITY_DN33691_c0_g1_i1.path2	TRINITY_DN14167_c0_g1_i1.path1	novel.10174	TRINITY_DN1903_c0_g2_i5.path1
TRINITY_DN8542_c1_g1_i1.path1	TRINITY_DN582_c1_g1_i4.path5	Pepsico2_Contig204.path2	Pepsico2_Contig7607.path2	Pepsico1_Contig5854.path1
Pepsico1_Contig454.path1	TRINITY_DN27881_c3_g1_i1.path1	novel.4161	TRINITY_DN104216_c0_g1_i1.path1	TRINITY_DN22011_c0_g1_i12.path2
TRINITY_DN1122_c0_g2_i1.path1	novel.2885	Pepsico2_Contig1298.path1	novel.9872	Pepsico2_Contig15976.path1
Pepsico1_Contig1410.path1	TRINITY_DN92266_c0_g1_i1.path1	TRINITY_DN61294_c0_g1_i1.path3	novel.2552	TRINITY_DN31495_c0_g1_i1.path2
Pepsico1_Contig2787.path1	TRINITY_DN10389_c0_g1_i1.path2	novel.3596	Pepsico2_Contig19194.path2	TRINITY_DN20955_c0_g1_i1.path1
TRINITY_DN69401_c0_g1_i1.path1	TRINITY_DN19282_c0_g1_i11.path1	TRINITY_DN5337_c0_g1_i4.path2	Pepsico2_Contig6083.path1	Pepsico1_Contig33661.path1
TRINITY_DN7516_c0_g1_i1.path1	Pepsico1_Contig32100.path1	TRINITY_DN19194_c0_g1_i2.path1	TRINITY_DN18020_c0_g1_i5.path1	novel.4700
TRINITY_DN20878_c0_g2_i1.path1	TRINITY_DN20898_c0_g1_i2.path1	TRINITY_DN13467_c0_g1_i2.path2	novel.5907	Pepsico1_Contig4833.path1
Pepsico2_Contig2590.path2	Pepsico1_Contig5252.path1	novel.6536	novel.1573	Pepsico1_Contig2324.path1
TRINITY_DN11075_c0_g1_i6.path4	novel.4138	TRINITY_DN8659_c0_g2_i1.path1	novel.1397	novel.1609
novel.10002	novel.915	novel.4343	TRINITY_DN16393_c1_g1_i1.path2	TRINITY_DN13541_c0_g2_i1.path2
novel.6955	TRINITY_DN28468_c0_g1_i4.path1	TRINITY_DN16672_c0_g2_i1.path1	Pepsico2_Contig4749.path1	TRINITY_DN8893_c0_g2_i1.path2
novel.7180	Pepsico2_Contig1862.path2	Pepsico2_Contig18212.path1	TRINITY_DN9621_c0_g1_i4.path3	Pepsico2_Contig7831.path2
novel.6921	Pepsico2_Contig18606.path1	TRINITY_DN12224_c0_g1_i6.path2	TRINITY_DN6047_c1_g1_i1.path1	novel.8481
TRINITY_DN19425_c0_g2_i1.path2	TRINITY_DN2800_c1_g1_i1.path5	Pepsico2_Contig2456.path5	novel.6345	novel.4199
novel.8447	novel.10313	novel.4283	novel.1191	Pepsico1_Contig32495.path1
novel.2885	TRINITY_DN30_c4_g1_i1.path2	novel.6103	novel.4584	novel.10096
novel.6912	novel.4338	TRINITY_DN5562_c0_g1_i5.path1	novel.3946	TRINITY_DN32007_c0_g2_i1.path1
TRINITY_DN37872_c0_g2_i1.path2	Pepsico1_Contig1725.path1	TRINITY_DN15577_c0_g1_i4.path2	novel.8061	novel.5845
TRINITY_DN15672_c0_g1_i5.path1	TRINITY_DN12916_c0_g1_i3.path1	TRINITY_DN10334_c0_g1_i5.path1	Pepsico1_Contig1338.path2	novel.1685
novel.4283	novel.6345	TRINITY_DN11720_c0_g1_i3.path3	novel.3567	TRINITY_DN12208_c0_g3_i1.path3
TRINITY_DN9742_c0_g1_i1.path1	novel.7469	novel.4252	TRINITY_DN54354_c0_g1_i1.path1	Pepsico1_Contig896.path1
Pepsico2_Contig20218.path1	TRINITY_DN17069_c0_g1_i1.path1	novel.2927	novel.3766	novel.7096
Pepsico2_Contig399.path1	Pepsico2_Contig11431.path1	TRINITY_DN36422_c0_g1_i5.path2	Pepsico1_Contig15443.path1	TRINITY_DN7691_c0_g5_i1.path1
novel.5800	Pepsico1_Contig35398.path1	TRINITY_DN105904_c0_g1_i1.path3	Pepsico1_Contig4907.path2	novel.3209
novel.4786	TRINITY_DN91798_c0_g1_i1.path4	novel.3261	novel.6209	Pepsico2_Contig3141.path2
TRINITY_DN3337_c0_g1_i3.path1	novel.1461	Pepsico1_Contig36037.path1	TRINITY_DN8659_c0_g2_i1.path1	TRINITY_DN112698_c0_g1_i1.path1
TRINITY_DN18350_c0_g1_i4.path1	Pepsico1_Contig2047.path1	novel.6201	TRINITY_DN24113_c3_g2_i1.path1	TRINITY_DN30064_c0_g3_i2.path3
novel.4036	TRINITY_DN19935_c0_g3_i1.path1	Pepsico2_Contig14938.path1	TRINITY_DN21003_c1_g1_i7.path2	TRINITY_DN35910_c0_g1_i1.path1
TRINITY_DN12888_c0_g1_i1.path2	TRINITY_DN16663_c1_g1_i1.path1	TRINITY_DN22504_c0_g2_i1.path1	novel.3824	TRINITY_DN5865_c0_g2_i1.path1
novel.455	TRINITY_DN6662_c0_g1_i6.path1	TRINITY_DN10633_c0_g1_i1.path1	novel.4259	TRINITY_DN6434_c0_g1_i8.path3
TRINITY_DN35560_c0_g1_i1.path1	TRINITY_DN31074_c1_g1_i1.path1	novel.4700	TRINITY_DN31406_c0_g3_i1.path1	TRINITY_DN42796_c0_g1_i4.path4
novel.1981	novel.8718	novel.2856	novel.8659	novel.8712
TRINITY_DN2085_c0_g1_i1.path1	TRINITY_DN98903_c0_g1_i1.path1	novel.4230	novel.9332	TRINITY_DN14283_c0_g2_i3.path1
TRINITY_DN20467_c0_g1_i2.path1	TRINITY_DN59329_c0_g1_i3.path1	TRINITY_DN12206_c1_g1_i1.path4	TRINITY_DN20133_c0_g1_i3.path2	novel.4901
novel.6552	TRINITY_DN28498_c0_g1_i7.path1	Pepsico1_Contig4939.path2	novel.3854	Pepsico1_Contig13502.path1
TRINITY_DN9265_c0_g2_i1.path1	TRINITY_DN38545_c0_g1_i1.path2	novel.9990	novel.7766	Pepsico2_Contig17238.path1
TRINITY_DN13335_c0_g2_i28.path1	novel.1645	novel.3428	TRINITY_DN23201_c0_g1_i2.path2	TRINITY_DN13602_c0_g1_i3.path2
novel.8624	TRINITY_DN40830_c0_g1_i1.path1	TRINITY_DN15966_c0_g1_i1.path1	novel.5671	TRINITY_DN15263_c0_g1_i2.path3
novel.1920	novel.5774	TRINITY_DN11853_c0_g1_i6.path2	TRINITY_DN34430_c1_g1_i1.path1	TRINITY_DN27881_c3_g1_i1.path1
novel.2773	novel.10364	novel.4199	novel.4471	Pepsico2_Contig6846.path1
novel.7478	TRINITY_DN2451_c0_g1_i3.path1	TRINITY_DN70282_c0_g1_i1.path1	Pepsico2_Contig2456.path2	TRINITY_DN99362_c0_g1_i1.path2
TRINITY_DN46466_c0_g1_i1.path2	novel.8677	Pepsico2_Contig14578.path1	TRINITY_DN11608_c0_g3_i3.path1	Pepsico2_Contig9136.path1
novel.10026	novel.10344	TRINITY_DN43075_c0_g1_i2.path1	novel.4026	TRINITY_DN115063_c0_g1_i1.path1
TRINITY_DN29163_c0_g5_i1.path2	TRINITY_DN13645_c0_g2_i1.path1	novel.8626	TRINITY_DN11414_c1_g1_i1.path1	novel.9814
Pepsico2_Contig6647.path1	novel.1020	novel.2014	TRINITY_DN22824_c0_g1_i2.path1	novel.3179
TRINITY_DN24110_c0_g1_i1.path1	TRINITY_DN21711_c0_g1_i1.path2	Pepsico2_Contig72.path1	Pepsico2_Contig15240.path1	TRINITY_DN8626_c0_g1_i1.path1
TRINITY_DN12502_c0_g5_i1.path1	TRINITY_DN27354_c0_g1_i2.path1	Pepsico2_Contig1792.path1	TRINITY_DN9602_c0_g2_i2.path1	Pepsico2_Contig20250.path2
TRINITY_DN52145_c0_g1_i1.path2	TRINITY_DN78521_c0_g1_i1.path1	TRINITY_DN10718_c0_g2_i1.path1	TRINITY_DN8714_c0_g1_i6.path1	Pepsico1_Contig4641.path1
novel.868	TRINITY_DN32587_c0_g1_i1.path1	TRINITY_DN5091_c1_g2_i1.path1	Pepsico2_Contig17223.path2	TRINITY_DN33031_c0_g1_i2.path1
novel.9000	TRINITY_DN1092_c1_g1_i1.path3	novel.7623	TRINITY_DN493_c0_g3_i1.path2	TRINITY_DN50482_c1_g2_i1.path1
Pepsico2_Contig16881.path1	TRINITY_DN65057_c0_g1_i1.path1	TRINITY_DN2610_c0_g1_i2.path2	novel.7492	novel.4487
TRINITY_DN106262_c0_g1_i1.path1	TRINITY_DN18610_c0_g2_i1.path1	novel.1033	novel.8232	TRINITY_DN29533_c0_g1_i2.path2
TRINITY_DN19237_c0_g1_i2.path1	Pepsico2_Contig6611.path4	Pepsico2_Contig5179.path1	TRINITY_DN70282_c0_g1_i1.path1	TRINITY_DN52245_c0_g1_i1.path3
novel.8816	TRINITY_DN69401_c0_g1_i1.path1	TRINITY_DN14372_c0_g1_i1.path2	novel.661	Pepsico1_Contig38456.path1
TRINITY_DN8260_c0_g1_i9.path1	novel.1751	novel.3593	novel.6823	TRINITY_DN27354_c0_g1_i2.path1
TRINITY_DN82631_c0_g1_i1.path2	TRINITY_DN54317_c0_g1_i1.path2	novel.7721	TRINITY_DN14129_c0_g1_i5.path2	TRINITY_DN12952_c0_g5_i1.path2
TRINITY_DN31074_c0_g1_i2.path2	Pepsico1_Contig5029.path1	TRINITY_DN3027_c0_g1_i4.path1	novel.10055	novel.2455
TRINITY_DN17432_c0_g1_i2.path2	TRINITY_DN29163_c0_g8_i1.path1	Pepsico1_Contig7564.path1	TRINITY_DN18134_c0_g1_i2.path2	novel.84
novel.4223	TRINITY_DN3540_c0_g1_i1.path1	novel.4163	novel.4339	novel.6722
novel.2812	novel.9014	novel.5590	novel.6244	novel.5034
Pepsico1_Contig1534.path1	Pepsico2_Contig19169.path1	novel.2986	novel.9820	TRINITY_DN74930_c0_g1_i1.path1
Pepsico1_Contig3010.path1	novel.4487	novel.7689	novel.8697	TRINITY_DN37224_c0_g3_i3.path3
TRINITY_DN69868_c0_g1_i1.path1	TRINITY_DN4976_c0_g3_i1.path1	novel.7051	TRINITY_DN5585_c0_g2_i1.path1	novel.8258
novel.4214	Pepsico2_Contig10033.path1	novel.4734	novel.3837	TRINITY_DN23915_c1_g2_i1.path1
TRINITY_DN98903_c0_g1_i1.path1	TRINITY_DN15991_c0_g1_i1.path2	TRINITY_DN4323_c0_g1_i1.path2	novel.8238	novel.8447
TRINITY_DN24316_c0_g2_i1.path2	TRINITY_DN42796_c0_g1_i4.path4	novel.6808	TRINITY_DN5235_c1_g2_i1.path1	Pepsico1_Contig4530.path1
TRINITY_DN23982_c0_g2_i1.path1	TRINITY_DN8916_c1_g3_i1.path2	TRINITY_DN2145_c0_g1_i1.path1	TRINITY_DN34101_c0_g2_i1.path1	novel.10150
TRINITY_DN40809_c0_g1_i1.path1	novel.1409	novel.10518	novel.1916	TRINITY_DN35913_c0_g1_i1.path2
novel.2656	TRINITY_DN8457_c0_g1_i1.path2	TRINITY_DN73847_c0_g1_i1.path1	TRINITY_DN16685_c0_g1_i2.path2	TRINITY_DN16303_c0_g1_i4.path1
TRINITY_DN11369_c0_g2_i2.path1	novel.6036	TRINITY_DN28393_c0_g1_i1.path1	TRINITY_DN1212_c0_g1_i1.path1	Pepsico2_Contig16947.path2
TRINITY_DN89_c0_g1_i9.path2	Pepsico2_Contig6108.path1	TRINITY_DN48515_c2_g1_i2.path2	TRINITY_DN17877_c2_g1_i6.path1	TRINITY_DN10657_c0_g1_i4.path2
TRINITY_DN12960_c0_g1_i2.path2	Pepsico2_Contig2883.path1	TRINITY_DN13777_c0_g1_i4.path1	novel.7399	novel.1647
Pepsico2_Contig7094.path1	novel.2986	Pepsico2_Contig6211.path1	TRINITY_DN10334_c0_g1_i5.path1	TRINITY_DN28498_c0_g1_i7.path1
TRINITY_DN32451_c0_g1_i2.path1	TRINITY_DN1766_c0_g2_i2.path1	novel.10052	novel.8994	novel.2140
TRINITY_DN10789_c0_g1_i2.path1	Pepsico2_Contig21093.path2	TRINITY_DN6917_c1_g1_i2.path2	TRINITY_DN8596_c0_g7_i1.path1	TRINITY_DN17282_c0_g2_i3.path1
TRINITY_DN13229_c0_g1_i1.path1	TRINITY_DN8916_c1_g2_i1.path2	novel.3655	TRINITY_DN20793_c0_g1_i2.path1	novel.766
TRINITY_DN27874_c0_g2_i2.path1	Pepsico2_Contig3785.path1	novel.7563	TRINITY_DN27062_c0_g1_i1.path1	TRINITY_DN64030_c0_g1_i1.path1
Pepsico2_Contig10328.path1	novel.4067	TRINITY_DN23475_c0_g1_i5.path2	TRINITY_DN22428_c1_g1_i2.path1	Pepsico2_Contig17385.path1
TRINITY_DN8257_c0_g2_i9.path1	TRINITY_DN7262_c0_g2_i1.path2	TRINITY_DN40653_c0_g1_i1.path1	novel.2725	TRINITY_DN8678_c1_g2_i1.path3
novel.1803	Pepsico1_Contig2831.path1	Pepsico2_Contig13838.path1	novel.10023	TRINITY_DN52429_c0_g1_i1.path1
TRINITY_DN4360_c2_g1_i3.path2	TRINITY_DN18372_c0_g1_i1.path1	TRINITY_DN4646_c1_g1_i1.path1	novel.10075	TRINITY_DN42903_c0_g1_i1.path2
TRINITY_DN15776_c0_g2_i1.path3	novel.3820	Pepsico2_Contig17223.path2	novel.3655	TRINITY_DN75290_c0_g1_i1.path2
TRINITY_DN70311_c0_g1_i1.path2	novel.10498	TRINITY_DN582_c1_g1_i4.path5	TRINITY_DN4449_c0_g1_i3.path2	TRINITY_DN32868_c0_g1_i1.path2
novel.9629	TRINITY_DN37597_c0_g2_i1.path1	TRINITY_DN14979_c0_g1_i6.path1	novel.4569	TRINITY_DN36963_c0_g1_i1.path1
novel.8008	novel.10162	TRINITY_DN493_c0_g3_i1.path2	TRINITY_DN17371_c0_g1_i18.path3	TRINITY_DN3933_c2_g1_i1.path1
Pepsico1_Contig3037.path2	TRINITY_DN10789_c0_g1_i2.path1	Pepsico1_Contig7353.path1	novel.1690	TRINITY_DN20837_c0_g1_i1.path3
novel.4131	TRINITY_DN44309_c1_g1_i2.path1	TRINITY_DN31417_c0_g2_i1.path1	TRINITY_DN7121_c0_g1_i8.path2	novel.10339
TRINITY_DN87669_c0_g1_i1.path1	Pepsico2_Contig15761.path3	TRINITY_DN34177_c0_g1_i1.path2	Pepsico1_Contig36238.path1	TRINITY_DN16252_c2_g1_i1.path1
Pepsico2_Contig12213.path2	novel.3031	Pepsico2_Contig17142.path1	novel.1610	TRINITY_DN33584_c0_g1_i1.path1
Pepsico1_Contig12096.path2	novel.4669	Pepsico2_Contig12914.path2	TRINITY_DN7964_c0_g1_i2.path1	TRINITY_DN1083_c3_g1_i3.path2
TRINITY_DN3156_c0_g1_i5.path3	TRINITY_DN19131_c1_g1_i1.path1	Pepsico2_Contig12780.path1	novel.6825	TRINITY_DN3803_c1_g1_i8.path1
novel.4578	TRINITY_DN17371_c0_g2_i2.path4	Pepsico2_Contig11431.path1	TRINITY_DN89960_c0_g1_i1.path1	novel.1523
Pepsico2_Contig19388.path2	novel.10156	TRINITY_DN74265_c0_g1_i1.path1	Pepsico1_Contig25437.path1	TRINITY_DN37224_c0_g3_i3.path4
TRINITY_DN32541_c0_g1_i1.path1	TRINITY_DN10283_c0_g1_i4.path2	novel.5820	Pepsico2_Contig1158.path1	TRINITY_DN21016_c0_g1_i1.path1
TRINITY_DN54224_c0_g1_i1.path1	novel.6793	TRINITY_DN29533_c0_g1_i2.path2	Pepsico2_Contig3027.path2	TRINITY_DN43680_c0_g1_i1.path4
Pepsico1_Contig9405.path1	Pepsico1_Contig350.path1	TRINITY_DN10198_c0_g1_i1.path1	TRINITY_DN1457_c0_g2_i3.path1	Pepsico1_Contig3842.path1
TRINITY_DN107273_c0_g1_i1.path1	Pepsico2_Contig10491.path1	novel.4295	novel.10057	Pepsico2_Contig16947.path1
novel.10248	novel.9565	TRINITY_DN13856_c2_g1_i1.path1	TRINITY_DN48806_c0_g1_i1.path2	novel.6384
novel.7728	novel.3179	novel.2878	novel.4543	novel.8181
TRINITY_DN9312_c0_g1_i4.path2	TRINITY_DN2_c0_g3_i1.path1	TRINITY_DN15078_c0_g1_i5.path1	novel.8387	novel.5616
novel.9411	novel.2603	novel.8056	novel.8971	TRINITY_DN45155_c0_g1_i1.path2
TRINITY_DN33578_c0_g1_i1.path1	TRINITY_DN16037_c0_g1_i2.path1	novel.5848	TRINITY_DN25304_c0_g1_i2.path2	Pepsico2_Contig6438.path1
Pepsico1_Contig192.path1	TRINITY_DN54224_c0_g1_i1.path1	TRINITY_DN25394_c0_g1_i3.path1	novel.6201	TRINITY_DN14594_c0_g1_i1.path3
TRINITY_DN40284_c0_g1_i1.path1	TRINITY_DN18372_c0_g1_i1.path2	TRINITY_DN25508_c0_g1_i1.path1	TRINITY_DN34220_c0_g2_i3.path1	novel.2549
Pepsico1_Contig3742.path1	TRINITY_DN47069_c1_g1_i1.path1	TRINITY_DN21106_c0_g1_i1.path2	novel.9751	novel.3297
novel.8099	novel.769	novel.4714	Pepsico2_Contig14837.path1	novel.2473
novel.9995	novel.9718	TRINITY_DN26199_c0_g1_i1.path1	novel.10198	novel.2877
TRINITY_DN7956_c0_g1_i1.path1	novel.4679	TRINITY_DN68100_c0_g1_i1.path2	Pepsico1_Contig8052.path2	TRINITY_DN25149_c0_g1_i1.path1
novel.768	novel.7721	Pepsico2_Contig12374.path1	novel.2527	Pepsico2_Contig17270.path1
novel.4338	Pepsico2_Contig17743.path1	TRINITY_DN56964_c0_g2_i1.path2	novel.6475	novel.233
TRINITY_DN67035_c0_g1_i1.path1	TRINITY_DN3540_c1_g1_i3.path3	TRINITY_DN23521_c0_g1_i1.path2	TRINITY_DN13444_c0_g1_i1.path1	novel.5640
TRINITY_DN40003_c0_g1_i1.path1	novel.9973	TRINITY_DN31544_c0_g3_i1.path1	novel.9565	novel.7927
Pepsico2_Contig9320.path1	TRINITY_DN91313_c0_g1_i1.path1	Pepsico2_Contig19857.path1	novel.6921	TRINITY_DN9891_c0_g4_i1.path1
novel.7469	TRINITY_DN10015_c0_g1_i1.path1	novel.8969	TRINITY_DN14890_c1_g1_i1.path1	TRINITY_DN36419_c0_g1_i4.path1
TRINITY_DN27881_c3_g1_i1.path1	novel.4162	TRINITY_DN97655_c0_g1_i1.path2	TRINITY_DN5911_c0_g1_i27.path1	novel.2603
Pepsico2_Contig18421.path2	Pepsico2_Contig19834.path1	Pepsico2_Contig8590.path1	TRINITY_DN20293_c0_g1_i1.path1	TRINITY_DN32852_c0_g1_i1.path2
TRINITY_DN10436_c0_g1_i10.path2	novel.10071	novel.6202	novel.148	TRINITY_DN12224_c0_g1_i6.path2
TRINITY_DN9887_c1_g1_i1.path1	novel.8780	TRINITY_DN2867_c0_g1_i4.path2	novel.2730	TRINITY_DN5258_c0_g1_i20.path1
novel.5743	novel.10161	novel.6665	novel.8764	TRINITY_DN8138_c1_g1_i1.path1
novel.6232	TRINITY_DN27978_c0_g2_i1.path1	TRINITY_DN4408_c0_g1_i4.path2	TRINITY_DN14377_c0_g2_i1.path1	TRINITY_DN7469_c0_g1_i1.path1
TRINITY_DN61900_c0_g2_i1.path1	Pepsico2_Contig678.path1	TRINITY_DN11057_c4_g1_i1.path1	TRINITY_DN43227_c1_g1_i2.path1	TRINITY_DN67289_c0_g1_i1.path3
novel.2673	Pepsico2_Contig12543.path1	TRINITY_DN17584_c0_g2_i6.path1	TRINITY_DN13059_c0_g1_i13.path2	TRINITY_DN45482_c0_g1_i2.path1
novel.10512	TRINITY_DN15407_c0_g1_i3.path1	TRINITY_DN27300_c0_g1_i1.path2	TRINITY_DN11183_c0_g2_i1.path2	novel.8959
TRINITY_DN10330_c0_g4_i1.path1	TRINITY_DN27002_c0_g1_i2.path1	Pepsico1_Contig2546.path1	Pepsico2_Contig11140.path1	TRINITY_DN27698_c0_g1_i1.path2
novel.9847	TRINITY_DN17722_c0_g1_i1.path1	TRINITY_DN24567_c0_g2_i1.path1	novel.4251	TRINITY_DN35164_c0_g1_i1.path2
novel.6198	TRINITY_DN8002_c0_g1_i1.path1	TRINITY_DN10183_c0_g2_i1.path1	novel.2496	TRINITY_DN21018_c0_g1_i1.path1
TRINITY_DN22284_c0_g2_i1.path1	TRINITY_DN3262_c0_g1_i4.path1	TRINITY_DN33848_c0_g1_i2.path2	TRINITY_DN3565_c0_g2_i1.path1	novel.4345
TRINITY_DN29426_c0_g1_i1.path1	Pepsico2_Contig13510.path1	TRINITY_DN26791_c0_g1_i1.path1	novel.6106	TRINITY_DN77074_c0_g1_i1.path1
novel.5227	Pepsico2_Contig1071.path1	TRINITY_DN42872_c0_g1_i1.path1	TRINITY_DN50826_c0_g1_i13.path1	novel.7623
Pepsico2_Contig16842.path2	novel.5853	TRINITY_DN46281_c0_g1_i1.path3	novel.8967	TRINITY_DN31047_c0_g1_i2.path2
TRINITY_DN8575_c0_g2_i5.path2	TRINITY_DN12019_c1_g1_i1.path1	Pepsico2_Contig7383.path1	TRINITY_DN1766_c0_g2_i2.path1	TRINITY_DN10561_c0_g1_i1.path1
novel.10593	novel.2965	TRINITY_DN28099_c0_g1_i1.path1	TRINITY_DN13190_c0_g1_i1.path1	TRINITY_DN30616_c0_g1_i1.path4
novel.8623	Pepsico2_Contig11560.path4	TRINITY_DN27698_c0_g1_i1.path2	novel.6115	TRINITY_DN49297_c0_g1_i8.path1
TRINITY_DN16832_c0_g1_i4.path1	Pepsico2_Contig15227.path1	novel.8364	novel.8178	novel.9677
TRINITY_DN28317_c0_g1_i1.path1	novel.2783	TRINITY_DN13856_c2_g1_i1.path2	TRINITY_DN8399_c1_g2_i1.path1	TRINITY_DN8364_c0_g1_i3.path1
TRINITY_DN89899_c0_g1_i1.path1	Pepsico1_Contig5373.path1	novel.1760	TRINITY_DN12888_c1_g1_i3.path1	TRINITY_DN37140_c0_g1_i1.path1
Pepsico1_Contig868.path2	Pepsico1_Contig36726.path1	TRINITY_DN56103_c0_g1_i1.path4	TRINITY_DN13777_c0_g1_i4.path1	TRINITY_DN40690_c0_g1_i1.path1
novel.6954	TRINITY_DN23360_c0_g1_i1.path3	novel.2079	novel.317	TRINITY_DN8636_c1_g1_i5.path2
novel.7095	TRINITY_DN87607_c0_g1_i1.path1	novel.6295	TRINITY_DN44615_c1_g1_i1.path1	TRINITY_DN1437_c1_g1_i1.path3
Pepsico1_Contig8378.path2	TRINITY_DN16509_c1_g1_i2.path1	novel.6912	TRINITY_DN15668_c0_g3_i2.path1	Pepsico2_Contig10730.path1
TRINITY_DN36697_c0_g1_i1.path1	novel.9881	TRINITY_DN20133_c0_g1_i3.path2	Pepsico2_Contig14543.path2	novel.7721
Pepsico2_Contig6151.path2	TRINITY_DN41217_c0_g1_i1.path2	novel.7997	Pepsico2_Contig19255.path1	TRINITY_DN13635_c0_g1_i6.path2
TRINITY_DN6470_c2_g1_i3.path2	Pepsico1_Contig7769.path1	Pepsico1_Contig33222.path1	novel.1093	novel.7406
TRINITY_DN31639_c0_g1_i5.path2	Pepsico2_Contig18231.path1	Pepsico1_Contig27196.path1	TRINITY_DN9135_c0_g1_i1.path1	novel.4204
TRINITY_DN5423_c0_g1_i7.path2	novel.7288	Pepsico2_Contig1862.path2	novel.5884	TRINITY_DN42861_c0_g1_i1.path1
Pepsico1_Contig844.path1	novel.7656	novel.3528	TRINITY_DN6300_c0_g1_i3.path1	Pepsico2_Contig17568.path1
Pepsico1_Contig8496.path1	TRINITY_DN21346_c0_g1_i2.path1	Pepsico2_Contig14293.path1	novel.4214	TRINITY_DN10797_c0_g1_i1.path1
TRINITY_DN20221_c0_g1_i1.path1	novel.4361	TRINITY_DN16150_c0_g1_i1.path1	TRINITY_DN8198_c0_g1_i2.path1	TRINITY_DN14068_c0_g2_i4.path1
novel.4279	TRINITY_DN21011_c0_g1_i7.path1	TRINITY_DN69401_c0_g1_i1.path1	TRINITY_DN17128_c0_g1_i1.path1	novel.82
TRINITY_DN21593_c1_g1_i1.path1	novel.6665	TRINITY_DN8714_c0_g1_i6.path1	novel.7414	novel.2635
novel.6605	TRINITY_DN103146_c0_g1_i1.path1	TRINITY_DN23507_c1_g1_i1.path1	TRINITY_DN89_c0_g1_i9.path1	Pepsico2_Contig16881.path1
TRINITY_DN15676_c0_g1_i4.path1	TRINITY_DN57234_c0_g1_i1.path1	novel.8008	TRINITY_DN36314_c0_g1_i1.path1	TRINITY_DN73454_c0_g1_i1.path3
TRINITY_DN16252_c3_g1_i1.path1	TRINITY_DN63686_c0_g1_i1.path2	Pepsico1_Contig1806.path1	TRINITY_DN77564_c0_g1_i1.path1	Pepsico2_Contig5923.path1
novel.8456	novel.8410	novel.8019	novel.8979	novel.4732
TRINITY_DN23163_c0_g3_i1.path2	TRINITY_DN70282_c0_g1_i1.path1	TRINITY_DN27590_c0_g1_i2.path1	novel.10004	novel.7499
TRINITY_DN6542_c0_g2_i1.path2	Pepsico1_Contig921.path2	Pepsico2_Contig3027.path2	Pepsico1_Contig34786.path2	novel.5671
novel.7493	novel.1915	Pepsico2_Contig4749.path1	TRINITY_DN13490_c0_g1_i5.path1	TRINITY_DN7406_c1_g1_i1.path1
Pepsico1_Contig2427.path1	Pepsico1_Contig38463.path1	novel.1442	novel.10510	TRINITY_DN32738_c0_g1_i1.path4
novel.9955	novel.9406	Pepsico2_Contig668.path1	TRINITY_DN24094_c0_g1_i2.path1	novel.4775
TRINITY_DN19131_c1_g1_i1.path1	novel.6386	Pepsico1_Contig33188.path1	TRINITY_DN42903_c0_g1_i1.path2	Pepsico2_Contig12841.path2
novel.7563	TRINITY_DN12916_c0_g4_i1.path2	novel.8223	TRINITY_DN11927_c0_g1_i7.path1	novel.333
TRINITY_DN6677_c0_g2_i2.path2	TRINITY_DN29163_c0_g5_i1.path2	TRINITY_DN48874_c0_g1_i2.path3	Pepsico2_Contig20717.path1	TRINITY_DN1502_c0_g1_i2.path2
Pepsico2_Contig8228.path1	TRINITY_DN12069_c0_g1_i9.path2	TRINITY_DN23915_c1_g2_i1.path1	novel.1150	TRINITY_DN9558_c0_g1_i5.path1
Pepsico1_Contig35721.path1	TRINITY_DN34076_c0_g1_i1.path1	Pepsico2_Contig20541.path1	Pepsico2_Contig19542.path1	TRINITY_DN28334_c0_g2_i1.path3
TRINITY_DN108142_c0_g1_i1.path2	TRINITY_DN2859_c0_g1_i1.path2	TRINITY_DN38770_c0_g1_i1.path1	novel.10504	TRINITY_DN13305_c0_g1_i1.path1
TRINITY_DN15845_c0_g1_i1.path1	TRINITY_DN11853_c0_g1_i6.path2	TRINITY_DN88372_c0_g1_i1.path3	TRINITY_DN22311_c0_g1_i7.path1	Pepsico1_Contig33710.path1
novel.4911	TRINITY_DN40421_c0_g1_i1.path1	TRINITY_DN52615_c0_g2_i1.path1	novel.6807	TRINITY_DN24494_c0_g2_i1.path3
TRINITY_DN8364_c0_g1_i3.path1	novel.10109	TRINITY_DN89899_c0_g1_i1.path1	TRINITY_DN3659_c2_g1_i1.path1	TRINITY_DN12069_c0_g1_i9.path2
novel.10362	TRINITY_DN13876_c0_g1_i16.path1	novel.10248	novel.2885	novel.3945
TRINITY_DN10332_c0_g2_i2.path1	TRINITY_DN2038_c0_g1_i6.path1	TRINITY_DN79182_c0_g1_i1.path1	TRINITY_DN20269_c0_g1_i2.path1	TRINITY_DN18626_c0_g1_i6.path2
novel.8077	novel.6194	novel.376	novel.2979	novel.3013
novel.1751	novel.4594	TRINITY_DN14594_c0_g2_i1.path1	TRINITY_DN52025_c0_g2_i1.path1	TRINITY_DN19704_c0_g4_i1.path1
Pepsico1_Contig5332.path2	novel.10095	TRINITY_DN7472_c0_g3_i1.path1	Pepsico2_Contig6342.path1	Pepsico2_Contig10648.path1
TRINITY_DN5091_c1_g2_i1.path1	TRINITY_DN17578_c0_g1_i2.path1	novel.7142	TRINITY_DN12916_c0_g4_i1.path1	TRINITY_DN53955_c0_g1_i1.path2
TRINITY_DN7782_c0_g2_i6.path1	Pepsico2_Contig10736.path1	TRINITY_DN32918_c0_g4_i1.path1	novel.10030	TRINITY_DN3367_c1_g1_i5.path1
TRINITY_DN15078_c0_g1_i5.path1	TRINITY_DN79489_c0_g1_i1.path1	Pepsico2_Contig11219.path2	novel.7142	TRINITY_DN33358_c0_g2_i1.path1
Pepsico2_Contig16001.path1	TRINITY_DN107902_c0_g1_i1.path1	Pepsico1_Contig1806.path2	TRINITY_DN60842_c0_g4_i3.path1	TRINITY_DN24796_c0_g1_i2.path2
novel.3056	novel.6784	novel.9723	TRINITY_DN16098_c0_g1_i3.path1	TRINITY_DN20769_c0_g1_i1.path1
TRINITY_DN37224_c0_g3_i3.path3	TRINITY_DN95547_c0_g1_i1.path2	TRINITY_DN19477_c0_g1_i2.path1	TRINITY_DN106494_c0_g1_i1.path1	TRINITY_DN97655_c0_g1_i1.path2
TRINITY_DN6366_c0_g1_i3.path2	TRINITY_DN42881_c1_g1_i1.path1	novel.1410	Pepsico1_Contig2876.path1	novel.2835
novel.10200	novel.6645	TRINITY_DN608_c3_g1_i1.path3	Pepsico2_Contig17952.path2	TRINITY_DN30962_c0_g1_i1.path5
Pepsico2_Contig20050.path1	novel.8198	TRINITY_DN55690_c1_g1_i1.path1	novel.6897	novel.4698
TRINITY_DN14890_c1_g1_i1.path1	TRINITY_DN46317_c0_g1_i1.path2	TRINITY_DN72627_c0_g1_i1.path1	TRINITY_DN18327_c0_g4_i1.path1	Pepsico2_Contig3027.path2
Pepsico1_Contig5029.path1	Pepsico2_Contig20306.path1	TRINITY_DN6605_c1_g4_i2.path2	novel.10153	TRINITY_DN3428_c2_g1_i1.path2
TRINITY_DN81269_c0_g1_i1.path1	TRINITY_DN27643_c0_g1_i3.path2	TRINITY_DN8734_c0_g1_i2.path2	TRINITY_DN3073_c1_g1_i2.path1	TRINITY_DN37827_c0_g1_i1.path1
TRINITY_DN9899_c0_g1_i1.path1	novel.4720	Pepsico1_Contig3037.path2	novel.1416	TRINITY_DN28435_c0_g1_i6.path2
TRINITY_DN16939_c0_g1_i2.path1	Pepsico1_Contig2066.path1	Pepsico1_Contig244.path1	novel.10168	Pepsico1_Contig36951.path1
Pepsico2_Contig8.path1	TRINITY_DN54151_c0_g1_i1.path2	TRINITY_DN24214_c0_g2_i1.path1	TRINITY_DN24494_c0_g2_i1.path3	novel.2749
Pepsico2_Contig24.path2	novel.10073	TRINITY_DN34372_c0_g1_i1.path2	TRINITY_DN17584_c0_g2_i6.path1	TRINITY_DN17128_c0_g1_i1.path2
TRINITY_DN16098_c0_g1_i3.path1	Pepsico1_Contig8012.path1	novel.10118	TRINITY_DN18442_c0_g1_i1.path1	TRINITY_DN107810_c0_g1_i1.path2
TRINITY_DN15693_c0_g1_i6.path1	TRINITY_DN10664_c1_g6_i1.path3	novel.10033	novel.7529	novel.7897
Pepsico2_Contig1394.path1	TRINITY_DN20292_c1_g1_i1.path1	novel.2018	TRINITY_DN12952_c0_g5_i1.path2	TRINITY_DN39682_c0_g3_i1.path1
TRINITY_DN8380_c0_g1_i5.path1	novel.8147	novel.6494	Pepsico2_Contig14420.path1	Pepsico2_Contig17264.path1
TRINITY_DN19852_c1_g1_i9.path2	TRINITY_DN16223_c0_g2_i1.path1	Pepsico2_Contig851.path1	TRINITY_DN10194_c2_g1_i1.path1	Pepsico2_Contig12369.path1
novel.7026	Pepsico1_Contig1064.path1	TRINITY_DN12952_c0_g5_i1.path1	novel.9995	TRINITY_DN72494_c0_g1_i1.path1
novel.9743	TRINITY_DN12888_c0_g1_i1.path2	TRINITY_DN8002_c0_g1_i1.path1	TRINITY_DN25759_c0_g1_i1.path1	TRINITY_DN11025_c0_g1_i4.path2
novel.6218	Pepsico1_Contig2431.path1	novel.351	novel.4662	TRINITY_DN91153_c0_g1_i1.path1
TRINITY_DN11615_c0_g1_i1.path1	Pepsico1_Contig34277.path1	novel.1661	novel.7677	novel.1070
Pepsico2_Contig6260.path2	Pepsico2_Contig12914.path2	novel.2751	TRINITY_DN11307_c0_g2_i1.path1	Pepsico1_Contig5176.path2
novel.8790	Pepsico2_Contig10142.path1	TRINITY_DN18327_c0_g4_i1.path1	TRINITY_DN108499_c0_g1_i1.path1	TRINITY_DN18906_c0_g1_i8.path1
TRINITY_DN17072_c0_g1_i4.path2	novel.4969	TRINITY_DN4780_c1_g1_i1.path1	TRINITY_DN61422_c1_g1_i1.path1	Pepsico2_Contig1790.path2
novel.8262	novel.9088	novel.4002	TRINITY_DN31252_c0_g1_i4.path2	Pepsico1_Contig5319.path1
novel.278	TRINITY_DN45482_c0_g1_i2.path1	TRINITY_DN27339_c0_g1_i1.path1	novel.5853	TRINITY_DN12888_c0_g1_i1.path2
Pepsico1_Contig5975.path2	Pepsico1_Contig1793.path1	TRINITY_DN1903_c0_g2_i5.path1	Pepsico2_Contig9541.path1	TRINITY_DN17070_c0_g2_i3.path1
TRINITY_DN17631_c0_g2_i1.path2	TRINITY_DN3543_c1_g1_i4.path1	TRINITY_DN36958_c0_g2_i1.path1	TRINITY_DN79961_c0_g1_i1.path1	Pepsico1_Contig36362.path2
novel.6081	TRINITY_DN8862_c1_g3_i1.path3	Pepsico1_Contig1451.path2	novel.7437	novel.8238
TRINITY_DN41090_c0_g1_i2.path2	novel.9837	TRINITY_DN21011_c0_g1_i7.path1	TRINITY_DN35638_c0_g1_i4.path2	TRINITY_DN101823_c0_g1_i1.path1
TRINITY_DN828_c3_g1_i1.path2	TRINITY_DN7310_c0_g1_i1.path1	TRINITY_DN2800_c1_g1_i1.path5	Pepsico1_Contig36306.path1	novel.3267
TRINITY_DN87607_c0_g1_i1.path1	novel.4123	novel.9981	TRINITY_DN21553_c0_g1_i5.path4	TRINITY_DN4868_c0_g1_i1.path2
novel.6311	TRINITY_DN26458_c0_g1_i1.path1	Pepsico2_Contig6083.path1	novel.1837	TRINITY_DN10283_c0_g1_i4.path2
Pepsico2_Contig16466.path1	TRINITY_DN47629_c0_g1_i1.path1	novel.5177	novel.7485	Pepsico1_Contig37967.path2
novel.3370	TRINITY_DN11057_c0_g2_i1.path4	novel.3990	novel.2973	novel.9967
TRINITY_DN11057_c0_g2_i1.path4	novel.1476	TRINITY_DN26330_c0_g1_i1.path1	TRINITY_DN9265_c0_g2_i1.path1	novel.10089
novel.9846	Pepsico2_Contig19721.path2	TRINITY_DN11185_c0_g2_i1.path1	Pepsico2_Contig9315.path5	TRINITY_DN30151_c0_g1_i2.path1
novel.8159	TRINITY_DN31720_c0_g1_i1.path4	TRINITY_DN9300_c0_g1_i5.path3	Pepsico1_Contig4585.path1	Pepsico2_Contig7545.path2
novel.5270	novel.2800	novel.9858	TRINITY_DN73847_c0_g1_i1.path1	Pepsico2_Contig3210.path1
Pepsico1_Contig2450.path2	novel.2886	novel.5110	novel.1410	TRINITY_DN1145_c0_g1_i1.path1
novel.4830	TRINITY_DN473_c2_g1_i2.path2	novel.3558	Pepsico1_Contig3168.path3	TRINITY_DN24377_c0_g1_i5.path1
TRINITY_DN70144_c0_g1_i1.path1	novel.5034	novel.309	TRINITY_DN115818_c0_g1_i1.path1	novel.5590
Pepsico1_Contig4046.path1	novel.7906	TRINITY_DN16565_c0_g1_i1.path1	Pepsico2_Contig3137.path1	TRINITY_DN11247_c0_g2_i4.path1
TRINITY_DN12519_c0_g1_i1.path1	TRINITY_DN20748_c0_g2_i1.path1	novel.8994	TRINITY_DN1083_c3_g1_i3.path2	TRINITY_DN11505_c0_g1_i1.path2
TRINITY_DN1488_c0_g2_i1.path2	Pepsico2_Contig5686.path1	TRINITY_DN17250_c0_g3_i1.path1	novel.6093	novel.10506
novel.6123	novel.6192	Pepsico1_Contig1236.path1	novel.10551	TRINITY_DN22311_c2_g1_i1.path1
TRINITY_DN14843_c0_g2_i3.path1	TRINITY_DN54531_c0_g1_i1.path1	TRINITY_DN8201_c0_g3_i1.path1	Pepsico2_Contig16621.path1	Pepsico2_Contig17141.path3
novel.84	TRINITY_DN113966_c0_g1_i1.path1	novel.9358	novel.293	TRINITY_DN46395_c0_g1_i1.path2
novel.9718	Pepsico2_Contig7749.path1	TRINITY_DN12419_c0_g2_i2.path1	novel.356	novel.3766
novel.6295	Pepsico1_Contig1678.path1	novel.9754	TRINITY_DN1564_c1_g1_i2.path1	TRINITY_DN37740_c0_g1_i1.path1
TRINITY_DN2867_c0_g1_i4.path2	TRINITY_DN12642_c0_g2_i1.path1	novel.1915	TRINITY_DN3939_c0_g2_i1.path2	TRINITY_DN21453_c0_g1_i3.path1
Pepsico2_Contig11464.path2	TRINITY_DN13823_c0_g2_i1.path2	novel.905	novel.6586	Pepsico2_Contig7949.path2
novel.6633	novel.5387	novel.2979	TRINITY_DN11853_c0_g1_i6.path2	novel.6218
TRINITY_DN14283_c0_g2_i3.path1	TRINITY_DN20764_c0_g4_i1.path1	TRINITY_DN2859_c0_g1_i1.path2	novel.4279	TRINITY_DN24308_c0_g1_i1.path1
TRINITY_DN56076_c0_g1_i1.path1	TRINITY_DN3523_c1_g2_i2.path1	novel.242	novel.10112	TRINITY_DN6202_c0_g1_i3.path2
TRINITY_DN76465_c0_g1_i1.path1	TRINITY_DN17584_c0_g2_i6.path1	Pepsico1_Contig36264.path1	TRINITY_DN22363_c1_g1_i2.path1	TRINITY_DN75666_c0_g1_i1.path1
Pepsico2_Contig5547.path1	TRINITY_DN27643_c1_g1_i1.path1	TRINITY_DN35418_c0_g2_i1.path1	TRINITY_DN18284_c0_g1_i2.path1	Pepsico2_Contig16536.path1
Pepsico2_Contig15327.path1	novel.3267	TRINITY_DN5876_c0_g2_i1.path1	novel.1905	TRINITY_DN10910_c0_g3_i2.path1
Pepsico2_Contig5121.path1	novel.9051	TRINITY_DN15654_c1_g3_i1.path1	TRINITY_DN56751_c0_g3_i1.path1	TRINITY_DN39880_c0_g1_i1.path2
Pepsico1_Contig2216.path2	Pepsico1_Contig33394.path1	TRINITY_DN49067_c1_g1_i1.path1	Pepsico1_Contig7022.path1	TRINITY_DN14426_c0_g2_i1.path1
Pepsico2_Contig18136.path1	TRINITY_DN3543_c2_g1_i1.path1	TRINITY_DN26227_c0_g1_i2.path1	TRINITY_DN42872_c0_g1_i1.path1	TRINITY_DN20146_c0_g1_i3.path1
novel.9725	TRINITY_DN1581_c0_g1_i3.path2	Pepsico1_Contig20.path1	novel.7469	TRINITY_DN10049_c0_g1_i6.path1
TRINITY_DN17256_c1_g2_i2.path1	novel.8345	novel.9332	TRINITY_DN28469_c0_g1_i4.path1	TRINITY_DN8257_c0_g2_i9.path1
novel.2518	novel.6925	TRINITY_DN40830_c0_g1_i1.path1	TRINITY_DN869_c0_g1_i1.path2	TRINITY_DN79056_c0_g1_i1.path1
novel.2799	novel.4486	TRINITY_DN24150_c0_g2_i3.path2	Pepsico2_Contig16449.path1	novel.5613
Pepsico1_Contig7043.path2	Pepsico2_Contig17270.path1	TRINITY_DN78942_c0_g1_i1.path1	novel.9971	TRINITY_DN5235_c1_g2_i1.path1
TRINITY_DN40238_c1_g1_i1.path2	novel.7051	TRINITY_DN23079_c0_g1_i1.path2	Pepsico2_Contig18251.path1	TRINITY_DN10371_c0_g1_i1.path1
TRINITY_DN57264_c0_g1_i1.path1	TRINITY_DN98402_c0_g1_i1.path1	TRINITY_DN106575_c0_g1_i1.path1	novel.6512	TRINITY_DN99434_c0_g1_i1.path1
TRINITY_DN40830_c0_g1_i1.path1	TRINITY_DN1950_c0_g1_i1.path2	TRINITY_DN19759_c0_g2_i2.path1	TRINITY_DN11475_c0_g5_i1.path1	novel.3012
Pepsico2_Contig13293.path1	TRINITY_DN34852_c0_g1_i1.path1	novel.6835	TRINITY_DN12396_c0_g1_i1.path1	TRINITY_DN36314_c0_g1_i1.path1
TRINITY_DN44562_c0_g1_i1.path1	TRINITY_DN6212_c0_g1_i4.path2	novel.3889	TRINITY_DN19174_c0_g1_i1.path1	TRINITY_DN20153_c1_g2_i1.path1
TRINITY_DN2_c0_g3_i1.path1	novel.8262	novel.7075	TRINITY_DN25195_c0_g1_i1.path1	novel.6680
TRINITY_DN40462_c0_g1_i1.path3	novel.1512	TRINITY_DN56541_c0_g1_i1.path3	TRINITY_DN11562_c0_g1_i1.path1	novel.3675
TRINITY_DN8457_c0_g1_i1.path2	novel.1282	novel.8481	novel.8981	TRINITY_DN8624_c0_g2_i1.path1
TRINITY_DN29776_c0_g2_i1.path1	novel.3593	TRINITY_DN11475_c0_g1_i2.path5	novel.6255	Pepsico1_Contig5463.path1
Pepsico1_Contig1752.path2	novel.10557	TRINITY_DN9891_c0_g4_i1.path1	novel.5524	novel.10153
novel.1093	TRINITY_DN30626_c0_g1_i1.path1	TRINITY_DN16242_c0_g1_i2.path1	Pepsico2_Contig2365.path1	TRINITY_DN92366_c0_g1_i1.path1
TRINITY_DN10932_c1_g1_i1.path1	TRINITY_DN19425_c0_g2_i1.path2	novel.9110	TRINITY_DN18324_c0_g1_i1.path2	TRINITY_DN72514_c0_g1_i1.path1
TRINITY_DN52375_c0_g1_i2.path1	TRINITY_DN8198_c0_g1_i2.path1	novel.6311	TRINITY_DN5198_c0_g2_i1.path1	TRINITY_DN95343_c0_g1_i1.path1
novel.6201	TRINITY_DN2760_c0_g1_i8.path1	Pepsico2_Contig9731.path1	novel.567	novel.2726
TRINITY_DN24638_c0_g1_i3.path1	novel.9847	TRINITY_DN7096_c0_g3_i1.path1	Pepsico2_Contig12543.path1	TRINITY_DN8879_c0_g1_i2.path1
TRINITY_DN74265_c0_g1_i1.path1	TRINITY_DN8257_c0_g2_i9.path1	TRINITY_DN9737_c1_g5_i2.path1	TRINITY_DN102479_c0_g1_i1.path1	Pepsico2_Contig768.path1
TRINITY_DN29533_c0_g1_i2.path2	TRINITY_DN3180_c0_g2_i1.path1	TRINITY_DN6405_c0_g1_i7.path2	TRINITY_DN21382_c1_g1_i1.path1	TRINITY_DN33408_c0_g1_i1.path1
novel.1870	TRINITY_DN1581_c0_g1_i3.path1	Pepsico1_Contig125.path1	TRINITY_DN23841_c0_g1_i1.path1	TRINITY_DN19477_c0_g1_i2.path1
novel.7347	TRINITY_DN6366_c0_g1_i3.path2	TRINITY_DN97496_c0_g1_i1.path1	TRINITY_DN36958_c0_g2_i1.path1	novel.5216
TRINITY_DN8155_c0_g2_i5.path2	novel.4372	novel.6374	novel.8966	TRINITY_DN4402_c0_g1_i5.path3
TRINITY_DN29076_c0_g1_i1.path2	Pepsico2_Contig2151.path2	novel.3761	Pepsico2_Contig1209.path1	novel.10155
TRINITY_DN11613_c0_g1_i1.path1	TRINITY_DN12705_c1_g1_i3.path1	TRINITY_DN101536_c0_g1_i1.path1	TRINITY_DN608_c3_g1_i1.path3	TRINITY_DN4261_c0_g1_i2.path2
TRINITY_DN24316_c0_g2_i1.path1	Pepsico1_Contig720.path1	Pepsico2_Contig17999.path1	Pepsico1_Contig38168.path1	TRINITY_DN80123_c0_g1_i1.path1
TRINITY_DN48853_c0_g1_i1.path2	Pepsico1_Contig2379.path3	novel.1536	Pepsico2_Contig8556.path2	TRINITY_DN67412_c0_g1_i1.path1
novel.9768	TRINITY_DN4828_c0_g1_i22.path1	TRINITY_DN24786_c0_g1_i1.path1	novel.5275	TRINITY_DN3197_c0_g2_i1.path1
Pepsico1_Contig5664.path1	novel.7499	TRINITY_DN12051_c0_g1_i1.path2	TRINITY_DN10230_c0_g1_i5.path2	novel.1464
TRINITY_DN33153_c0_g1_i1.path2	novel.6047	TRINITY_DN65040_c0_g1_i1.path1	TRINITY_DN15966_c0_g1_i1.path1	Pepsico2_Contig3138.path1
TRINITY_DN29598_c0_g1_i1.path1	TRINITY_DN17250_c0_g3_i1.path1	TRINITY_DN17692_c1_g1_i2.path1	TRINITY_DN12206_c1_g1_i1.path4	TRINITY_DN12019_c1_g1_i1.path1
TRINITY_DN44024_c0_g1_i1.path1	TRINITY_DN17818_c0_g1_i3.path1	TRINITY_DN8756_c9_g1_i1.path3	TRINITY_DN231_c2_g3_i1.path1	TRINITY_DN11565_c0_g1_i2.path1
TRINITY_DN84925_c0_g1_i1.path1	TRINITY_DN5734_c0_g1_i5.path1	TRINITY_DN13876_c0_g1_i16.path1	Pepsico1_Contig5480.path2	TRINITY_DN20164_c0_g1_i1.path1
TRINITY_DN113908_c0_g1_i1.path1	Pepsico1_Contig1064.path2	TRINITY_DN64592_c0_g1_i1.path1	Pepsico2_Contig17284.path1	TRINITY_DN11183_c0_g2_i1.path2
novel.7261	TRINITY_DN11833_c0_g1_i4.path2	novel.10557	novel.10116	TRINITY_DN37151_c0_g1_i1.path1
TRINITY_DN6101_c0_g1_i2.path1	Pepsico2_Contig10651.path1	TRINITY_DN19935_c0_g3_i1.path1	novel.10121	novel.7794
novel.6918	TRINITY_DN15610_c0_g1_i1.path1	novel.8285	novel.9993	TRINITY_DN11853_c0_g1_i6.path2
novel.8091	Pepsico1_Contig1886.path2	Pepsico2_Contig4420.path1	novel.3765	novel.8708
novel.7905	Pepsico2_Contig18421.path1	TRINITY_DN81935_c0_g1_i1.path1	novel.84	TRINITY_DN3073_c1_g1_i2.path1
novel.466	TRINITY_DN45102_c0_g1_i3.path1	novel.3512	novel.905	TRINITY_DN40754_c0_g1_i3.path2
TRINITY_DN11057_c0_g2_i1.path1	Pepsico1_Contig2381.path1	novel.1371	novel.9985	TRINITY_DN93142_c0_g1_i1.path1
Pepsico1_Contig2094.path1	TRINITY_DN2610_c0_g1_i2.path2	novel.9957	TRINITY_DN32933_c0_g1_i1.path1	TRINITY_DN57273_c0_g1_i1.path1
TRINITY_DN11247_c0_g2_i4.path1	Pepsico2_Contig10795.path2	novel.5801	TRINITY_DN59329_c0_g1_i3.path1	Pepsico2_Contig3741.path1
TRINITY_DN13584_c0_g2_i1.path1	TRINITY_DN21218_c0_g2_i1.path2	novel.9406	TRINITY_DN3208_c0_g1_i1.path2	Pepsico2_Contig17139.path1
TRINITY_DN28334_c0_g2_i1.path3	TRINITY_DN10436_c0_g1_i10.path2	novel.3093	novel.2707	novel.4669
TRINITY_DN15991_c0_g1_i1.path2	novel.6494	TRINITY_DN7855_c0_g1_i1.path2	novel.2290	novel.2606
Pepsico2_Contig18443.path1	Pepsico2_Contig417.path2	TRINITY_DN10471_c0_g3_i1.path1	Pepsico1_Contig38400.path1	TRINITY_DN23915_c0_g1_i1.path1
TRINITY_DN44006_c0_g1_i1.path1	Pepsico2_Contig17142.path1	novel.6143	Pepsico2_Contig11431.path1	TRINITY_DN17250_c0_g3_i1.path1
TRINITY_DN17099_c0_g1_i1.path1	Pepsico2_Contig9299.path1	TRINITY_DN10096_c0_g1_i4.path1	TRINITY_DN15280_c0_g1_i2.path1	TRINITY_DN3565_c0_g2_i1.path1
Pepsico2_Contig14411.path2	novel.10512	TRINITY_DN1387_c0_g1_i2.path2	TRINITY_DN25394_c0_g1_i3.path1	TRINITY_DN5767_c0_g1_i5.path1
Pepsico2_Contig12169.path1	Pepsico2_Contig1817.path2	novel.1104	TRINITY_DN8399_c2_g1_i1.path1	TRINITY_DN28761_c0_g1_i1.path1
TRINITY_DN2_c0_g1_i2.path2	novel.4153	Pepsico1_Contig1064.path2	TRINITY_DN11586_c0_g2_i3.path1	TRINITY_DN16387_c0_g1_i5.path1
novel.8188	Pepsico2_Contig836.path1	novel.4421	novel.4247	TRINITY_DN2702_c0_g3_i3.path1
novel.5680	TRINITY_DN29289_c0_g1_i1.path1	TRINITY_DN13415_c0_g1_i2.path1	novel.7463	TRINITY_DN8912_c0_g1_i1.path2
Pepsico1_Contig1941.path1	TRINITY_DN48874_c0_g1_i2.path3	novel.7028	novel.7897	novel.4263
Pepsico1_Contig1413.path1	Pepsico2_Contig11035.path1	Pepsico1_Contig34277.path1	TRINITY_DN16565_c0_g1_i1.path1	Pepsico1_Contig33565.path1
TRINITY_DN44088_c0_g1_i1.path1	Pepsico1_Contig2110.path2	Pepsico2_Contig9316.path1	TRINITY_DN24214_c0_g2_i1.path1	Pepsico1_Contig4053.path1
TRINITY_DN18757_c0_g3_i1.path1	novel.2620	TRINITY_DN31089_c0_g1_i5.path2	TRINITY_DN50482_c1_g2_i1.path1	TRINITY_DN12488_c0_g1_i5.path1
TRINITY_DN5198_c0_g2_i1.path1	novel.6613	TRINITY_DN1966_c0_g1_i1.path1	TRINITY_DN110047_c0_g1_i1.path1	novel.4930
TRINITY_DN8364_c0_g1_i3.path2	Pepsico1_Contig32234.path1	Pepsico2_Contig14602.path1	TRINITY_DN10718_c0_g2_i1.path1	TRINITY_DN11367_c0_g1_i3.path1
TRINITY_DN44861_c0_g1_i1.path1	novel.6129	Pepsico1_Contig52.path2	TRINITY_DN4675_c0_g1_i4.path2	novel.9310
novel.7218	novel.997	TRINITY_DN29289_c0_g1_i1.path1	TRINITY_DN40802_c0_g3_i1.path2	TRINITY_DN100611_c0_g1_i1.path2
Pepsico1_Contig5332.path1	novel.6912	TRINITY_DN8839_c0_g3_i1.path1	novel.4204	TRINITY_DN26083_c0_g1_i3.path1
Pepsico1_Contig3021.path1	TRINITY_DN4942_c0_g1_i2.path2	TRINITY_DN3171_c0_g1_i2.path1	Pepsico2_Contig18471.path1	novel.7862
TRINITY_DN47353_c0_g1_i1.path2	TRINITY_DN493_c0_g3_i1.path5	novel.7492	TRINITY_DN92594_c0_g1_i1.path1	Pepsico2_Contig403.path1
Pepsico1_Contig4717.path2	TRINITY_DN34205_c0_g1_i1.path1	novel.10086	novel.10034	TRINITY_DN13379_c0_g3_i1.path1
TRINITY_DN23975_c0_g1_i6.path1	novel.4917	Pepsico1_Contig6747.path1	TRINITY_DN27522_c0_g1_i1.path4	Pepsico2_Contig13709.path1
Pepsico1_Contig4393.path1	novel.8969	novel.2818	TRINITY_DN20785_c0_g1_i2.path1	Pepsico2_Contig7284.path2
Pepsico1_Contig3340.path1	TRINITY_DN20221_c0_g1_i1.path1	Pepsico1_Contig740.path1	novel.3577	TRINITY_DN30920_c0_g1_i2.path1
novel.9993	TRINITY_DN10330_c0_g4_i1.path1	TRINITY_DN27741_c0_g1_i1.path1	TRINITY_DN22613_c0_g1_i2.path1	novel.5823
Pepsico1_Contig14274.path2	TRINITY_DN13895_c0_g1_i2.path1	TRINITY_DN21050_c0_g1_i1.path1	novel.997	Pepsico1_Contig29178.path1
TRINITY_DN22664_c0_g1_i3.path1	TRINITY_DN89960_c0_g1_i1.path1	TRINITY_DN21218_c0_g2_i1.path2	novel.6122	TRINITY_DN7326_c1_g1_i4.path3
TRINITY_DN4827_c1_g1_i1.path1	novel.9981	novel.3010	novel.7790	Pepsico1_Contig32338.path1
TRINITY_DN60611_c0_g1_i1.path1	TRINITY_DN22284_c0_g2_i1.path1	Pepsico2_Contig3304.path1	novel.1225	TRINITY_DN53750_c0_g1_i2.path1
novel.10530	TRINITY_DN24981_c0_g1_i1.path1	Pepsico1_Contig5649.path2	novel.4930	TRINITY_DN73325_c0_g1_i1.path2
novel.4602	TRINITY_DN16211_c1_g1_i1.path1	TRINITY_DN23206_c0_g1_i2.path1	novel.4755	TRINITY_DN20936_c3_g1_i1.path4
novel.622	TRINITY_DN74831_c0_g1_i1.path1	novel.2074	novel.10247	TRINITY_DN27874_c0_g2_i2.path1
novel.7377	TRINITY_DN10332_c0_g2_i2.path1	Pepsico1_Contig165.path1	TRINITY_DN1167_c2_g1_i3.path1	TRINITY_DN3930_c2_g1_i2.path1
TRINITY_DN24494_c0_g2_i1.path3	TRINITY_DN61294_c0_g1_i1.path3	novel.7096	novel.4023	TRINITY_DN10134_c0_g2_i1.path1
TRINITY_DN25418_c1_g1_i1.path1	TRINITY_DN17262_c1_g1_i1.path1	Pepsico2_Contig3842.path1	TRINITY_DN18326_c0_g1_i2.path1	Pepsico2_Contig8713.path1
TRINITY_DN7173_c0_g2_i1.path2	TRINITY_DN48729_c0_g1_i1.path1	Pepsico1_Contig1631.path1	novel.8977	TRINITY_DN34205_c0_g1_i1.path5
TRINITY_DN102140_c0_g1_i1.path2	Pepsico1_Contig8046.path1	TRINITY_DN34359_c0_g1_i1.path1	TRINITY_DN10318_c0_g1_i9.path1	Pepsico2_Contig2004.path2
TRINITY_DN63402_c0_g1_i1.path2	TRINITY_DN19077_c0_g1_i2.path2	TRINITY_DN8353_c0_g1_i1.path1	TRINITY_DN7981_c0_g2_i2.path1	TRINITY_DN29899_c0_g2_i1.path1
TRINITY_DN2554_c1_g1_i1.path1	Pepsico2_Contig16001.path1	TRINITY_DN7691_c0_g1_i1.path1	TRINITY_DN17069_c0_g1_i1.path1	novel.8144
TRINITY_DN10888_c0_g1_i3.path1	novel.6277	TRINITY_DN54317_c0_g1_i1.path2	novel.308	TRINITY_DN9363_c0_g1_i6.path2
TRINITY_DN5337_c0_g1_i4.path2	TRINITY_DN24316_c0_g2_i1.path1	novel.4224	TRINITY_DN19482_c0_g1_i2.path1	TRINITY_DN37419_c0_g1_i1.path1
Pepsico2_Contig11219.path1	TRINITY_DN8242_c0_g2_i11.path1	Pepsico2_Contig1581.path1	Pepsico2_Contig10447.path1	Pepsico1_Contig6752.path1
TRINITY_DN41217_c0_g1_i1.path2	TRINITY_DN7691_c1_g1_i3.path2	novel.6102	novel.7997	TRINITY_DN84740_c0_g1_i1.path1
TRINITY_DN35676_c0_g1_i1.path2	novel.4974	novel.10232	TRINITY_DN9236_c0_g2_i5.path1	novel.7687
Pepsico2_Contig12544.path2	TRINITY_DN56103_c0_g1_i1.path4	novel.4484	TRINITY_DN849_c0_g1_i2.path1	novel.1386
novel.7004	Pepsico2_Contig9316.path1	Pepsico2_Contig11307.path1	TRINITY_DN17256_c1_g2_i2.path1	TRINITY_DN34767_c0_g2_i1.path2
TRINITY_DN75417_c0_g1_i1.path2	Pepsico2_Contig10730.path1	TRINITY_DN5979_c0_g1_i4.path1	TRINITY_DN10048_c0_g1_i2.path1	TRINITY_DN30283_c0_g1_i1.path2
novel.4650	novel.7963	novel.8718	TRINITY_DN17371_c0_g2_i2.path4	Pepsico2_Contig12985.path1
Pepsico2_Contig12487.path1	TRINITY_DN6677_c0_g2_i2.path2	TRINITY_DN1083_c3_g1_i3.path2	Pepsico1_Contig1886.path2	novel.7456
novel.6665	Pepsico2_Contig14383.path1	novel.9986	novel.8976	novel.8243
TRINITY_DN7248_c0_g1_i1.path2	novel.2552	TRINITY_DN26639_c0_g1_i1.path1	TRINITY_DN44309_c1_g1_i2.path1	Pepsico2_Contig10076.path1
Pepsico2_Contig2126.path1	novel.10190	novel.1512	Pepsico1_Contig36037.path1	TRINITY_DN25946_c0_g1_i3.path1
TRINITY_DN111692_c0_g1_i1.path3	TRINITY_DN2010_c0_g1_i1.path1	novel.7970	novel.3424	novel.8454
TRINITY_DN21506_c0_g1_i1.path1	novel.10096	Pepsico2_Contig2050.path1	TRINITY_DN20697_c0_g1_i3.path1	TRINITY_DN34158_c0_g2_i1.path1
novel.2050	TRINITY_DN24343_c3_g1_i1.path1	novel.10311	TRINITY_DN29640_c0_g3_i1.path1	TRINITY_DN33964_c0_g3_i1.path5
TRINITY_DN27104_c0_g1_i3.path1	TRINITY_DN9573_c0_g1_i7.path1	novel.8764	novel.6966	Pepsico2_Contig583.path1
TRINITY_DN84799_c0_g1_i1.path1	TRINITY_DN23473_c0_g1_i1.path1	novel.6746	Pepsico2_Contig14959.path1	novel.6247
novel.1906	TRINITY_DN231_c2_g3_i1.path1	TRINITY_DN17069_c0_g1_i1.path1	novel.2486	TRINITY_DN17682_c0_g1_i1.path1
novel.4199	TRINITY_DN5591_c0_g1_i3.path1	novel.6262	novel.7927	novel.2891
novel.8689	TRINITY_DN8315_c0_g1_i2.path1	novel.2496	TRINITY_DN19932_c0_g1_i2.path1	TRINITY_DN4474_c1_g1_i3.path2
TRINITY_DN9923_c0_g1_i1.path1	TRINITY_DN10718_c0_g2_i1.path1	TRINITY_DN107476_c0_g1_i1.path1	Pepsico2_Contig19960.path1	TRINITY_DN13335_c0_g2_i28.path1
TRINITY_DN27978_c0_g2_i1.path1	TRINITY_DN14283_c0_g2_i3.path1	Pepsico2_Contig10033.path1	TRINITY_DN67002_c0_g1_i1.path1	Pepsico2_Contig19415.path2
novel.6547	TRINITY_DN39067_c0_g1_i1.path1	novel.9879	TRINITY_DN33054_c1_g1_i1.path1	TRINITY_DN19043_c0_g1_i1.path1
TRINITY_DN93142_c0_g1_i1.path1	Pepsico1_Contig695.path1	Pepsico2_Contig11219.path1	novel.10554	TRINITY_DN87607_c0_g1_i1.path1
TRINITY_DN38204_c0_g1_i1.path2	Pepsico2_Contig19981.path1	novel.1561	Pepsico1_Contig31597.path1	Pepsico1_Contig38019.path2
novel.8647	novel.8019	TRINITY_DN72514_c0_g1_i1.path1	novel.9754	Pepsico2_Contig19690.path1
TRINITY_DN25062_c0_g1_i1.path1	TRINITY_DN7691_c1_g2_i1.path1	TRINITY_DN23473_c0_g1_i1.path1	TRINITY_DN31544_c0_g3_i1.path1	Pepsico2_Contig746.path1
novel.1593	Pepsico2_Contig7576.path1	novel.8763	TRINITY_DN46281_c0_g1_i1.path3	TRINITY_DN88826_c0_g1_i1.path1
Pepsico2_Contig6079.path1	TRINITY_DN12952_c0_g4_i1.path1	TRINITY_DN71337_c0_g1_i1.path1	TRINITY_DN2294_c1_g3_i1.path2	novel.5555
Pepsico1_Contig23776.path2	TRINITY_DN53392_c0_g2_i3.path1	TRINITY_DN1621_c0_g2_i4.path1	novel.1760	Pepsico1_Contig2134.path1
Pepsico1_Contig6141.path1	novel.1397	TRINITY_DN18179_c0_g1_i5.path2	Pepsico2_Contig19721.path2	Pepsico1_Contig4393.path1
TRINITY_DN29073_c0_g1_i3.path2	novel.1065	Pepsico2_Contig13690.path1	Pepsico2_Contig1053.path1	TRINITY_DN1457_c0_g2_i3.path1
TRINITY_DN34076_c0_g1_i1.path1	Pepsico2_Contig17856.path1	TRINITY_DN32510_c0_g1_i1.path1	novel.5653	novel.10140
Pepsico2_Contig19834.path1	Pepsico2_Contig4749.path1	TRINITY_DN5585_c0_g2_i1.path1	TRINITY_DN9170_c1_g3_i1.path2	novel.1921
novel.8238	TRINITY_DN63620_c0_g1_i1.path1	Pepsico2_Contig17807.path1	novel.9014	TRINITY_DN21557_c0_g1_i2.path2
novel.7573	TRINITY_DN25095_c0_g2_i1.path1	novel.1344	Pepsico2_Contig1817.path2	novel.9821
TRINITY_DN71897_c0_g1_i1.path1	novel.3808	TRINITY_DN28132_c0_g1_i1.path1	novel.2140	TRINITY_DN107312_c0_g1_i1.path1
TRINITY_DN13467_c0_g1_i2.path2	novel.5590	TRINITY_DN12916_c0_g1_i3.path1	TRINITY_DN11367_c0_g1_i3.path1	TRINITY_DN16818_c0_g3_i1.path2
Pepsico1_Contig37962.path1	novel.4225	Pepsico2_Contig5686.path1	TRINITY_DN4973_c2_g1_i1.path1	Pepsico1_Contig7353.path1
novel.2844	TRINITY_DN15524_c0_g1_i1.path1	TRINITY_DN44454_c0_g1_i1.path2	novel.2473	Pepsico2_Contig18606.path1
novel.330	TRINITY_DN21449_c0_g4_i2.path1	TRINITY_DN28317_c0_g1_i1.path1	novel.6103	TRINITY_DN8916_c1_g2_i1.path2
novel.4281	TRINITY_DN3618_c0_g1_i2.path1	novel.3671	TRINITY_DN11737_c0_g2_i1.path1	TRINITY_DN84840_c0_g1_i1.path1
novel.4782	Pepsico1_Contig239.path1	TRINITY_DN20864_c0_g1_i1.path1	novel.4578	Pepsico1_Contig38616.path1
novel.8395	TRINITY_DN76005_c0_g1_i1.path1	novel.7493	TRINITY_DN5534_c0_g1_i1.path1	TRINITY_DN29017_c0_g1_i1.path2
TRINITY_DN21557_c0_g1_i2.path2	Pepsico2_Contig12290.path1	TRINITY_DN18442_c3_g1_i1.path1	Pepsico2_Contig9731.path1	novel.5826
novel.4487	Pepsico2_Contig12701.path2	TRINITY_DN89960_c0_g1_i1.path1	TRINITY_DN11615_c0_g1_i1.path1	TRINITY_DN107535_c0_g1_i1.path2
TRINITY_DN100983_c0_g1_i1.path1	TRINITY_DN114157_c0_g1_i1.path1	novel.7610	TRINITY_DN14002_c2_g1_i1.path1	novel.8053
TRINITY_DN45534_c0_g1_i1.path3	novel.7872	TRINITY_DN73454_c0_g1_i1.path3	TRINITY_DN14962_c0_g1_i1.path1	TRINITY_DN4425_c1_g1_i1.path2
Pepsico2_Contig11072.path2	TRINITY_DN23163_c0_g3_i1.path2	novel.9939	TRINITY_DN22405_c1_g2_i2.path1	novel.3199
novel.5309	TRINITY_DN8444_c0_g1_i4.path1	Pepsico1_Contig2521.path2	novel.6808	novel.311
TRINITY_DN107120_c0_g1_i1.path1	TRINITY_DN6082_c0_g2_i1.path1	TRINITY_DN11302_c0_g1_i3.path1	TRINITY_DN34759_c0_g2_i1.path1	TRINITY_DN2800_c1_g1_i1.path5
novel.460	novel.294	Pepsico2_Contig1053.path1	TRINITY_DN26990_c0_g1_i3.path1	novel.515
TRINITY_DN60015_c0_g2_i1.path3	TRINITY_DN37419_c0_g1_i1.path1	Pepsico1_Contig538.path1	novel.4285	Pepsico1_Contig4225.path1
TRINITY_DN15280_c0_g1_i2.path1	Pepsico1_Contig3742.path1	Pepsico2_Contig13278.path1	TRINITY_DN20542_c1_g1_i1.path1	novel.6886
TRINITY_DN9270_c0_g2_i1.path1	TRINITY_DN26834_c1_g1_i1.path1	TRINITY_DN3659_c2_g1_i1.path5	TRINITY_DN45570_c0_g1_i1.path1	Pepsico1_Contig7043.path2
TRINITY_DN6129_c0_g1_i1.path1	Pepsico2_Contig6331.path2	TRINITY_DN33334_c0_g1_i1.path1	novel.1201	novel.2986
Pepsico1_Contig7129.path1	TRINITY_DN17429_c0_g1_i1.path1	Pepsico2_Contig14937.path1	TRINITY_DN27638_c0_g1_i9.path1	TRINITY_DN56524_c0_g1_i1.path2
novel.4265	TRINITY_DN27698_c0_g1_i1.path2	TRINITY_DN2833_c0_g2_i1.path1	TRINITY_DN10070_c0_g2_i4.path1	TRINITY_DN7859_c0_g1_i9.path1
novel.4462	TRINITY_DN1451_c0_g1_i1.path2	TRINITY_DN46692_c0_g1_i1.path2	Pepsico1_Contig573.path1	TRINITY_DN14201_c0_g1_i1.path1
novel.9624	TRINITY_DN23279_c1_g1_i1.path1	novel.4669	novel.4284	TRINITY_DN48729_c0_g1_i1.path1
TRINITY_DN63985_c1_g1_i1.path1	TRINITY_DN5860_c0_g1_i6.path2	TRINITY_DN57296_c0_g1_i1.path1	TRINITY_DN1132_c1_g1_i1.path2	TRINITY_DN45450_c0_g1_i1.path3
Pepsico2_Contig17142.path1	TRINITY_DN15597_c0_g1_i6.path1	Pepsico1_Contig2876.path1	novel.10009	Pepsico2_Contig14293.path1
TRINITY_DN43201_c1_g1_i1.path2	TRINITY_DN46570_c0_g1_i4.path1	TRINITY_DN48729_c0_g1_i1.path1	Pepsico1_Contig36399.path1	Pepsico2_Contig6157.path1
novel.2762	novel.8447	Pepsico1_Contig868.path2	novel.4507	TRINITY_DN73722_c0_g1_i1.path1
TRINITY_DN21323_c0_g1_i1.path1	novel.4702	novel.8625	Pepsico1_Contig9692.path1	Pepsico2_Contig1158.path1
Pepsico2_Contig17270.path1	Pepsico1_Contig598.path2	TRINITY_DN15597_c0_g1_i6.path1	Pepsico2_Contig5686.path1	TRINITY_DN26063_c0_g2_i1.path1
TRINITY_DN6605_c1_g4_i2.path3	novel.5270	TRINITY_DN27218_c0_g2_i1.path1	novel.4265	novel.8042
TRINITY_DN3393_c0_g1_i2.path1	Pepsico2_Contig6151.path1	TRINITY_DN23140_c0_g1_i1.path1	TRINITY_DN11720_c0_g1_i3.path3	novel.8018
TRINITY_DN64572_c0_g1_i1.path2	novel.10175	TRINITY_DN6817_c0_g2_i1.path1	TRINITY_DN12924_c0_g2_i1.path1	TRINITY_DN34076_c0_g1_i1.path1
Pepsico2_Contig12208.path2	TRINITY_DN26063_c0_g2_i1.path1	TRINITY_DN47629_c0_g1_i1.path1	TRINITY_DN57234_c0_g1_i1.path1	TRINITY_DN48813_c0_g1_i1.path1
Pepsico1_Contig1082.path1	novel.6143	TRINITY_DN7145_c0_g1_i6.path1	TRINITY_DN1964_c0_g1_i1.path1	novel.10521
TRINITY_DN24216_c0_g3_i1.path1	TRINITY_DN53356_c0_g1_i3.path2	novel.8499	Pepsico2_Contig10472.path1	TRINITY_DN16594_c0_g2_i1.path2
TRINITY_DN48822_c0_g1_i2.path1	Pepsico2_Contig2033.path1	TRINITY_DN55806_c0_g1_i1.path1	novel.4461	TRINITY_DN105904_c0_g1_i1.path3
novel.3114	TRINITY_DN339_c0_g1_i2.path1	novel.1389	novel.5216	Pepsico2_Contig295.path2
TRINITY_DN10633_c0_g1_i1.path1	novel.4210	TRINITY_DN5423_c0_g1_i7.path2	TRINITY_DN12397_c0_g1_i1.path1	Pepsico2_Contig14572.path1
TRINITY_DN23279_c1_g1_i1.path1	TRINITY_DN100023_c0_g1_i1.path2	novel.3147	TRINITY_DN24619_c0_g1_i1.path1	TRINITY_DN4941_c0_g2_i1.path2
TRINITY_DN49059_c0_g1_i1.path1	novel.3665	TRINITY_DN16607_c0_g4_i3.path3	novel.868	TRINITY_DN13891_c1_g1_i4.path1
novel.9332	TRINITY_DN21511_c0_g1_i1.path1	Pepsico2_Contig13971.path1	novel.7478	TRINITY_DN56760_c0_g1_i1.path2
TRINITY_DN37472_c0_g1_i1.path1	Pepsico2_Contig19672.path2	Pepsico2_Contig12487.path1	novel.10462	TRINITY_DN13582_c0_g1_i3.path1
Pepsico2_Contig4468.path1	Pepsico1_Contig1082.path1	TRINITY_DN34852_c0_g1_i1.path1	Pepsico2_Contig14796.path1	TRINITY_DN20966_c0_g3_i1.path1
novel.1412	novel.5139	TRINITY_DN54531_c0_g1_i1.path1	TRINITY_DN70741_c0_g1_i1.path2	Pepsico2_Contig5308.path1
TRINITY_DN39232_c0_g3_i1.path1	TRINITY_DN41963_c0_g1_i1.path1	TRINITY_DN28244_c0_g1_i1.path1	novel.10071	TRINITY_DN28620_c0_g1_i1.path1
TRINITY_DN39651_c0_g2_i1.path2	TRINITY_DN7714_c0_g1_i8.path2	TRINITY_DN18757_c0_g3_i1.path1	TRINITY_DN4769_c0_g1_i5.path1	TRINITY_DN28718_c0_g1_i7.path2
Pepsico1_Contig1789.path1	TRINITY_DN17766_c0_g1_i1.path1	Pepsico1_Contig3224.path1	novel.4161	novel.9751
TRINITY_DN111855_c0_g1_i1.path1	TRINITY_DN5767_c0_g1_i5.path1	TRINITY_DN3618_c0_g1_i2.path1	novel.3558	novel.8188
novel.7051	TRINITY_DN71042_c0_g1_i1.path1	novel.9327	TRINITY_DN65246_c0_g1_i1.path1	TRINITY_DN44647_c0_g1_i1.path1
TRINITY_DN20898_c0_g1_i2.path1	TRINITY_DN30463_c0_g1_i1.path1	TRINITY_DN4868_c0_g1_i1.path2	TRINITY_DN1658_c0_g1_i4.path1	TRINITY_DN15800_c1_g2_i2.path1
TRINITY_DN97229_c0_g1_i1.path2	Pepsico1_Contig669.path1	Pepsico2_Contig1071.path1	TRINITY_DN28365_c0_g1_i3.path1	TRINITY_DN55723_c0_g1_i1.path2
novel.4912	TRINITY_DN1015_c0_g2_i2.path1	Pepsico1_Contig346.path1	TRINITY_DN57575_c0_g1_i2.path2	TRINITY_DN95547_c0_g1_i1.path2
novel.2394	Pepsico2_Contig3282.path1	TRINITY_DN102388_c0_g1_i1.path1	Pepsico2_Contig8343.path1	TRINITY_DN2568_c0_g2_i3.path1
novel.4734	Pepsico1_Contig38215.path1	TRINITY_DN9370_c0_g2_i1.path1	TRINITY_DN8652_c0_g1_i6.path1	novel.10156
Pepsico1_Contig26366.path1	novel.2868	Pepsico2_Contig1590.path1	novel.242	TRINITY_DN103335_c0_g1_i1.path1
TRINITY_DN29673_c1_g1_i1.path1	TRINITY_DN27063_c3_g1_i1.path1	novel.10133	TRINITY_DN15263_c0_g1_i2.path3	novel.4279
TRINITY_DN64775_c0_g1_i1.path1	novel.9719	TRINITY_DN52802_c0_g1_i1.path1	novel.8188	TRINITY_DN112904_c0_g1_i1.path1
TRINITY_DN14943_c0_g1_i1.path1	novel.5255	TRINITY_DN79489_c0_g1_i1.path1	Pepsico2_Contig8618.path1	TRINITY_DN17275_c0_g1_i3.path1
novel.355	TRINITY_DN33468_c0_g1_i2.path2	novel.406	novel.1854	novel.1349
Pepsico2_Contig1862.path2	TRINITY_DN25887_c0_g1_i1.path1	TRINITY_DN8364_c0_g1_i3.path2	TRINITY_DN23481_c0_g1_i1.path1	novel.7454
TRINITY_DN27135_c0_g1_i1.path1	TRINITY_DN15963_c0_g1_i2.path2	Pepsico2_Contig19740.path1	TRINITY_DN16827_c0_g1_i4.path1	Pepsico1_Contig31597.path1
TRINITY_DN17221_c0_g1_i5.path2	TRINITY_DN27013_c2_g1_i1.path1	Pepsico2_Contig305.path1	TRINITY_DN48874_c0_g1_i2.path3	TRINITY_DN89877_c0_g1_i1.path1
TRINITY_DN24684_c0_g1_i4.path2	Pepsico2_Contig13162.path2	TRINITY_DN22972_c0_g1_i1.path1	Pepsico2_Contig16931.path1	TRINITY_DN15602_c0_g1_i1.path1
TRINITY_DN26486_c0_g1_i1.path2	TRINITY_DN7097_c0_g1_i1.path2	TRINITY_DN11234_c0_g2_i1.path1	novel.8203	novel.2186
TRINITY_DN14680_c0_g2_i1.path2	TRINITY_DN37608_c0_g1_i1.path2	TRINITY_DN5957_c0_g1_i2.path1	TRINITY_DN29296_c0_g1_i3.path1	Pepsico2_Contig11431.path1
TRINITY_DN41398_c0_g1_i2.path4	novel.7478	novel.1150	Pepsico2_Contig14269.path1	novel.8591
novel.9280	TRINITY_DN8145_c0_g2_i1.path1	TRINITY_DN20292_c1_g1_i1.path1	TRINITY_DN103340_c0_g1_i1.path2	TRINITY_DN29923_c0_g1_i1.path2
TRINITY_DN21515_c0_g1_i1.path1	novel.2858	TRINITY_DN41321_c0_g2_i1.path1	novel.4345	TRINITY_DN4849_c0_g3_i1.path1
TRINITY_DN112037_c0_g1_i1.path1	Pepsico2_Contig10834.path2	TRINITY_DN10332_c0_g2_i2.path1	novel.9579	Pepsico2_Contig889.path3
novel.2877	novel.9110	TRINITY_DN21098_c0_g1_i1.path2	novel.5987	TRINITY_DN19900_c0_g2_i1.path1
TRINITY_DN29458_c0_g3_i1.path3	novel.9187	novel.10034	novel.7481	TRINITY_DN8230_c1_g1_i1.path1
novel.8449	TRINITY_DN27622_c0_g2_i1.path1	TRINITY_DN4640_c0_g2_i1.path1	TRINITY_DN72382_c0_g1_i1.path1	TRINITY_DN3784_c0_g3_i1.path1
novel.4659	novel.5551	TRINITY_DN66659_c0_g1_i1.path1	novel.8056	TRINITY_DN11452_c0_g2_i1.path2
Pepsico1_Contig11038.path1	novel.1920	TRINITY_DN25015_c0_g1_i1.path1	novel.9310	novel.7790
novel.5617	Pepsico2_Contig4408.path1	Pepsico2_Contig10736.path1	TRINITY_DN4323_c0_g1_i1.path2	TRINITY_DN1550_c3_g1_i2.path1
Pepsico1_Contig6143.path1	novel.4936	novel.10125	novel.4720	TRINITY_DN58774_c0_g1_i1.path2
TRINITY_DN39880_c0_g1_i1.path2	novel.10004	TRINITY_DN16509_c1_g1_i2.path1	novel.9846	novel.9915
novel.2338	Pepsico1_Contig38044.path1	TRINITY_DN40359_c0_g1_i2.path1	Pepsico2_Contig2316.path1	novel.7364
Pepsico1_Contig4198.path2	Pepsico2_Contig1967.path1	TRINITY_DN31771_c0_g3_i1.path1	novel.9815	TRINITY_DN23687_c0_g1_i1.path1
TRINITY_DN16946_c0_g1_i3.path4	novel.333	TRINITY_DN10053_c0_g4_i1.path2	TRINITY_DN16940_c1_g2_i2.path1	TRINITY_DN16272_c0_g1_i1.path1
TRINITY_DN40927_c0_g1_i3.path2	Pepsico1_Contig3357.path1	TRINITY_DN5734_c0_g1_i5.path1	novel.7102	novel.7375
Pepsico1_Contig15345.path1	novel.5014	Pepsico1_Contig5252.path1	novel.8167	TRINITY_DN5741_c1_g1_i4.path1
Pepsico1_Contig3777.path1	Pepsico2_Contig3027.path2	TRINITY_DN15997_c0_g1_i1.path1	Pepsico2_Contig19169.path1	TRINITY_DN29256_c2_g1_i1.path2
novel.3558	novel.84	Pepsico2_Contig9596.path1	TRINITY_DN571_c0_g2_i1.path1	TRINITY_DN71518_c0_g1_i1.path1
TRINITY_DN18065_c0_g1_i3.path2	Pepsico2_Contig14260.path1	TRINITY_DN4976_c0_g3_i1.path1	novel.8970	novel.3147
Pepsico2_Contig19857.path1	novel.7414	Pepsico1_Contig37173.path1	novel.7661	TRINITY_DN23121_c0_g2_i1.path2
novel.447	TRINITY_DN23481_c0_g1_i1.path1	novel.4265	TRINITY_DN2504_c2_g1_i1.path3	TRINITY_DN28244_c0_g1_i1.path1
Pepsico1_Contig3436.path1	TRINITY_DN9843_c0_g1_i3.path1	TRINITY_DN29690_c0_g2_i3.path2	novel.1647	TRINITY_DN97971_c0_g1_i1.path1
novel.1962	novel.1197	TRINITY_DN76869_c0_g1_i1.path1	TRINITY_DN15617_c0_g1_i2.path1	TRINITY_DN34655_c0_g1_i1.path1
Pepsico2_Contig3027.path2	novel.10064	novel.3141	Pepsico2_Contig18136.path1	novel.5750
TRINITY_DN34413_c0_g1_i1.path2	novel.4358	TRINITY_DN79116_c0_g1_i1.path1	TRINITY_DN113519_c0_g1_i1.path1	novel.7963
TRINITY_DN47113_c0_g3_i1.path1	TRINITY_DN22405_c1_g2_i2.path1	TRINITY_DN76552_c0_g1_i1.path1	TRINITY_DN6400_c0_g1_i1.path1	TRINITY_DN69478_c0_g1_i1.path1
TRINITY_DN7357_c0_g1_i1.path1	novel.10209	TRINITY_DN33691_c0_g1_i1.path1	TRINITY_DN24956_c0_g1_i1.path2	TRINITY_DN91373_c0_g1_i1.path1
novel.10127	TRINITY_DN19482_c0_g1_i2.path1	TRINITY_DN26834_c1_g1_i1.path1	TRINITY_DN16242_c0_g1_i2.path1	novel.4038
novel.7790	novel.6835	novel.1416	TRINITY_DN8916_c1_g2_i1.path2	novel.4830
Pepsico1_Contig2341.path1	Pepsico2_Contig7448.path1	TRINITY_DN102054_c0_g1_i1.path1	TRINITY_DN11568_c2_g2_i1.path1	Pepsico2_Contig1957.path1
novel.1013	TRINITY_DN31241_c0_g1_i1.path1	TRINITY_DN28469_c0_g1_i4.path1	Pepsico2_Contig14988.path1	Pepsico2_Contig21247.path1
TRINITY_DN2816_c0_g1_i1.path1	TRINITY_DN30879_c0_g1_i4.path1	TRINITY_DN12466_c0_g1_i5.path1	novel.4598	novel.6056
TRINITY_DN59832_c0_g1_i1.path1	TRINITY_DN8893_c0_g1_i7.path1	novel.4969	TRINITY_DN8916_c1_g3_i1.path2	TRINITY_DN43352_c0_g1_i1.path1
novel.9286	TRINITY_DN8201_c0_g3_i1.path1	novel.8901	TRINITY_DN27422_c0_g1_i2.path1	Pepsico1_Contig5664.path1
Pepsico2_Contig6569.path2	Pepsico2_Contig6800.path1	TRINITY_DN112295_c0_g1_i1.path1	novel.10139	Pepsico2_Contig21106.path1
novel.5448	TRINITY_DN107535_c0_g1_i1.path2	Pepsico2_Contig3621.path1	TRINITY_DN11773_c0_g2_i1.path2	TRINITY_DN27978_c0_g2_i1.path1
novel.1190	Pepsico1_Contig7133.path1	Pepsico2_Contig19929.path1	novel.5176	novel.6823
TRINITY_DN6155_c0_g1_i2.path1	TRINITY_DN3765_c0_g1_i1.path1	TRINITY_DN69001_c0_g1_i1.path2	novel.1751	TRINITY_DN50606_c0_g1_i1.path1
Pepsico2_Contig10736.path1	novel.4283	TRINITY_DN1658_c0_g1_i4.path1	TRINITY_DN19704_c0_g4_i1.path1	TRINITY_DN28276_c0_g1_i1.path1
novel.2871	TRINITY_DN34205_c0_g1_i1.path2	Pepsico2_Contig1441.path1	TRINITY_DN61294_c0_g1_i1.path3	Pepsico1_Contig4742.path1
novel.8125	novel.6765	novel.1645	TRINITY_DN17631_c0_g2_i1.path2	TRINITY_DN95671_c0_g1_i1.path2
novel.7721	novel.2459	novel.8553	novel.1187	TRINITY_DN32149_c0_g1_i1.path1
novel.5047	Pepsico2_Contig9535.path1	novel.9716	novel.5386	TRINITY_DN17280_c0_g1_i1.path1
novel.8067	TRINITY_DN24142_c0_g2_i1.path3	novel.4786	novel.8504	Pepsico2_Contig16466.path1
TRINITY_DN3583_c4_g1_i1.path1	TRINITY_DN17528_c0_g1_i1.path3	novel.9194	TRINITY_DN89129_c0_g1_i1.path1	novel.4210
TRINITY_DN11137_c0_g3_i1.path2	TRINITY_DN24030_c0_g1_i1.path1	Pepsico2_Contig72.path2	TRINITY_DN34006_c0_g1_i1.path1	novel.5982
novel.557	novel.9054	TRINITY_DN17386_c0_g1_i6.path1	TRINITY_DN102490_c0_g1_i1.path2	novel.1282
Pepsico1_Contig6392.path2	Pepsico1_Contig3340.path1	TRINITY_DN69479_c0_g1_i1.path2	TRINITY_DN40454_c0_g1_i1.path1	TRINITY_DN16929_c1_g1_i4.path1
TRINITY_DN38958_c0_g1_i1.path3	TRINITY_DN33848_c0_g1_i2.path2	novel.1946	Pepsico2_Contig12914.path2	Pepsico1_Contig7129.path1
TRINITY_DN6562_c0_g1_i5.path3	TRINITY_DN14943_c0_g1_i1.path2	novel.1603	Pepsico1_Contig8378.path2	TRINITY_DN19529_c0_g1_i1.path1
TRINITY_DN18144_c0_g1_i2.path2	novel.5457	novel.5652	Pepsico1_Contig33222.path1	novel.7493
TRINITY_DN82881_c0_g1_i1.path2	TRINITY_DN74_c0_g2_i1.path1	TRINITY_DN31139_c0_g1_i1.path2	TRINITY_DN13535_c0_g1_i2.path1	novel.7718
novel.3254	Pepsico1_Contig743.path1	Pepsico1_Contig5432.path1	novel.309	Pepsico2_Contig15950.path2
TRINITY_DN26974_c0_g1_i2.path1	TRINITY_DN34006_c0_g1_i1.path1	Pepsico1_Contig239.path1	TRINITY_DN45628_c0_g1_i1.path1	novel.1489
novel.2611	Pepsico2_Contig21247.path1	TRINITY_DN5732_c0_g1_i3.path2	TRINITY_DN90580_c0_g1_i1.path2	TRINITY_DN88984_c0_g1_i1.path1
TRINITY_DN9952_c0_g2_i1.path1	TRINITY_DN53491_c0_g1_i3.path1	TRINITY_DN3939_c0_g2_i1.path2	TRINITY_DN99434_c0_g1_i1.path1	TRINITY_DN100312_c0_g1_i1.path1
novel.8489	novel.6336	Pepsico2_Contig17900.path2	TRINITY_DN11475_c0_g6_i1.path1	TRINITY_DN10797_c0_g2_i1.path1
Pepsico2_Contig19672.path2	novel.8484	novel.9882	novel.4659	TRINITY_DN33964_c0_g3_i1.path4
TRINITY_DN63337_c0_g1_i2.path2	novel.1147	novel.5014	TRINITY_DN20284_c0_g1_i1.path1	Pepsico2_Contig19169.path1
TRINITY_DN24494_c4_g1_i1.path1	Pepsico2_Contig1570.path1	Pepsico1_Contig6901.path2	Pepsico2_Contig15185.path1	TRINITY_DN29458_c0_g3_i1.path3
TRINITY_DN4734_c0_g1_i5.path2	TRINITY_DN12649_c0_g2_i2.path1	novel.3240	TRINITY_DN79182_c0_g1_i1.path1	novel.2552
TRINITY_DN82425_c0_g1_i1.path1	Pepsico2_Contig11400.path1	novel.5987	TRINITY_DN23959_c1_g1_i3.path1	TRINITY_DN40487_c0_g1_i4.path1
TRINITY_DN31006_c1_g1_i1.path1	novel.4732	novel.308	TRINITY_DN13856_c2_g1_i1.path1	Pepsico1_Contig7796.path1
TRINITY_DN12649_c0_g2_i2.path1	TRINITY_DN3020_c1_g1_i4.path1	TRINITY_DN21449_c0_g4_i2.path1	TRINITY_DN48515_c2_g1_i2.path2	TRINITY_DN44615_c1_g1_i1.path1
TRINITY_DN12069_c0_g1_i9.path2	TRINITY_DN5604_c0_g1_i2.path1	TRINITY_DN6162_c0_g3_i1.path1	novel.10202	TRINITY_DN9140_c1_g1_i1.path1
novel.7008	TRINITY_DN48141_c0_g1_i1.path1	Pepsico2_Contig13879.path1	TRINITY_DN7983_c0_g1_i3.path2	TRINITY_DN4108_c0_g1_i5.path2
TRINITY_DN61192_c0_g1_i1.path2	novel.5044	TRINITY_DN10283_c0_g1_i4.path2	novel.10498	TRINITY_DN8839_c0_g3_i1.path1
novel.7593	novel.8647	TRINITY_DN107120_c0_g1_i1.path1	TRINITY_DN9421_c0_g2_i6.path1	Pepsico1_Contig2110.path2
novel.4270	TRINITY_DN107273_c0_g1_i1.path1	TRINITY_DN1564_c1_g1_i2.path1	novel.5616	TRINITY_DN13125_c0_g1_i1.path1
Pepsico1_Contig896.path1	TRINITY_DN16252_c3_g1_i1.path1	TRINITY_DN10015_c0_g1_i1.path3	TRINITY_DN24041_c1_g1_i2.path1	Pepsico2_Contig19295.path2
TRINITY_DN493_c0_g3_i1.path5	Pepsico2_Contig17856.path2	TRINITY_DN34101_c0_g2_i1.path1	Pepsico2_Contig12731.path1	TRINITY_DN65246_c0_g1_i1.path1
novel.6279	Pepsico1_Contig7653.path1	TRINITY_DN79056_c0_g1_i1.path1	novel.10043	TRINITY_DN29018_c0_g1_i1.path1
novel.8994	TRINITY_DN11696_c0_g3_i1.path2	Pepsico2_Contig1817.path2	TRINITY_DN1437_c1_g1_i1.path2	TRINITY_DN19774_c0_g1_i16.path2
Pepsico1_Contig7404.path2	TRINITY_DN29785_c0_g1_i1.path1	TRINITY_DN31380_c0_g1_i1.path1	Pepsico2_Contig18421.path2	TRINITY_DN6365_c0_g1_i3.path1
Pepsico2_Contig132.path1	TRINITY_DN28735_c0_g2_i1.path1	Pepsico2_Contig5353.path1	Pepsico1_Contig5252.path1	TRINITY_DN11927_c0_g1_i7.path1
TRINITY_DN62079_c0_g1_i1.path2	novel.2638	TRINITY_DN74831_c0_g1_i1.path1	Pepsico2_Contig13519.path1	novel.7481
TRINITY_DN44383_c0_g1_i1.path1	TRINITY_DN24595_c0_g2_i4.path1	TRINITY_DN11842_c0_g1_i1.path1	novel.6169	TRINITY_DN19131_c1_g1_i1.path1
TRINITY_DN12812_c0_g1_i2.path2	TRINITY_DN74265_c0_g1_i1.path1	TRINITY_DN17070_c0_g2_i3.path1	TRINITY_DN73757_c0_g1_i1.path2	Pepsico2_Contig4262.path1
TRINITY_DN44647_c0_g1_i1.path1	Pepsico2_Contig8796.path2	Pepsico1_Contig2831.path1	novel.2871	Pepsico2_Contig14796.path1
Pepsico1_Contig32144.path1	TRINITY_DN37599_c0_g1_i2.path1	novel.7897	Pepsico1_Contig26056.path1	TRINITY_DN20296_c0_g1_i1.path4
TRINITY_DN15006_c0_g1_i3.path1	Pepsico2_Contig18136.path1	novel.6114	TRINITY_DN28435_c0_g1_i6.path2	TRINITY_DN85711_c0_g1_i1.path3
TRINITY_DN85833_c0_g1_i1.path1	TRINITY_DN4261_c0_g1_i2.path2	novel.9014	novel.1371	TRINITY_DN5412_c0_g1_i1.path2
Pepsico2_Contig17141.path3	Pepsico2_Contig17223.path2	TRINITY_DN3337_c1_g1_i2.path2	TRINITY_DN55418_c0_g1_i1.path1	TRINITY_DN39677_c0_g1_i1.path1
novel.10301	TRINITY_DN31917_c0_g1_i1.path1	TRINITY_DN1387_c0_g1_i2.path1	TRINITY_DN26947_c0_g1_i2.path1	Pepsico2_Contig648.path1
novel.3563	TRINITY_DN293_c0_g1_i3.path1	novel.10507	TRINITY_DN12206_c1_g1_i1.path1	novel.5900
Pepsico1_Contig4042.path1	TRINITY_DN2665_c1_g1_i3.path2	Pepsico2_Contig12544.path2	novel.6047	TRINITY_DN22062_c0_g1_i3.path1
novel.7096	TRINITY_DN27981_c0_g1_i1.path1	TRINITY_DN8311_c0_g1_i1.path1	novel.33	novel.1385
TRINITY_DN17168_c0_g3_i1.path2	TRINITY_DN11057_c4_g1_i1.path1	TRINITY_DN95829_c0_g1_i1.path1	TRINITY_DN8371_c0_g1_i1.path1	Pepsico2_Contig2332.path2
TRINITY_DN104181_c0_g1_i1.path1	Pepsico2_Contig9003.path1	Pepsico2_Contig14912.path1	novel.10017	TRINITY_DN869_c0_g1_i1.path2
novel.10156	TRINITY_DN24444_c0_g1_i1.path1	novel.1130	novel.6793	TRINITY_DN26583_c3_g1_i1.path1
Pepsico2_Contig19977.path1	novel.2877	TRINITY_DN37308_c0_g1_i1.path2	TRINITY_DN9058_c0_g1_i21.path1	novel.2494
TRINITY_DN15598_c0_g2_i1.path1	TRINITY_DN20750_c0_g1_i1.path1	Pepsico1_Contig788.path1	Pepsico1_Contig3842.path1	Pepsico2_Contig16931.path1
TRINITY_DN52356_c0_g1_i1.path1	Pepsico2_Contig15090.path1	Pepsico2_Contig13071.path1	Pepsico2_Contig15761.path3	TRINITY_DN5614_c0_g2_i1.path2
TRINITY_DN26063_c0_g2_i1.path1	TRINITY_DN8714_c0_g1_i6.path1	TRINITY_DN7146_c0_g1_i2.path3	TRINITY_DN97391_c0_g1_i1.path1	TRINITY_DN93255_c0_g1_i1.path1
novel.2967	TRINITY_DN43758_c0_g2_i1.path1	TRINITY_DN88350_c0_g1_i1.path2	novel.8959	Pepsico2_Contig417.path2
TRINITY_DN9857_c0_g2_i1.path1	TRINITY_DN5876_c0_g2_i1.path2	TRINITY_DN4942_c0_g1_i2.path2	novel.1489	TRINITY_DN22437_c1_g1_i1.path1
TRINITY_DN10442_c0_g1_i18.path2	Pepsico1_Contig106.path2	Pepsico1_Contig36221.path1	TRINITY_DN35314_c0_g1_i3.path2	Pepsico2_Contig6539.path1
TRINITY_DN14638_c0_g1_i4.path2	TRINITY_DN21656_c0_g1_i1.path2	TRINITY_DN21656_c0_g1_i1.path2	TRINITY_DN8862_c1_g3_i1.path3	TRINITY_DN1766_c0_g2_i2.path1
novel.5594	TRINITY_DN18387_c0_g1_i3.path1	TRINITY_DN18372_c0_g1_i1.path1	TRINITY_DN11194_c2_g1_i1.path2	TRINITY_DN18425_c0_g1_i3.path1
Pepsico2_Contig19142.path1	Pepsico1_Contig8012.path2	Pepsico2_Contig10472.path1	novel.2345	TRINITY_DN35963_c0_g1_i1.path2
Pepsico1_Contig2725.path2	TRINITY_DN11522_c0_g1_i4.path2	TRINITY_DN11431_c0_g1_i1.path2	TRINITY_DN11696_c0_g3_i1.path2	novel.2627
TRINITY_DN5911_c0_g1_i27.path1	Pepsico2_Contig11219.path1	TRINITY_DN31074_c1_g1_i1.path1	Pepsico2_Contig4348.path1	Pepsico2_Contig3282.path1
TRINITY_DN36958_c0_g2_i1.path1	TRINITY_DN113908_c0_g1_i1.path1	novel.5416	TRINITY_DN103146_c0_g1_i1.path1	TRINITY_DN48040_c0_g1_i1.path1
Pepsico2_Contig19574.path1	TRINITY_DN13108_c0_g1_i1.path2	Pepsico2_Contig14158.path3	Pepsico1_Contig5839.path1	TRINITY_DN33054_c4_g1_i1.path4
TRINITY_DN13622_c0_g3_i1.path1	Pepsico2_Contig16242.path1	TRINITY_DN11054_c1_g2_i2.path1	novel.1136	TRINITY_DN81196_c0_g1_i1.path1
novel.8009	novel.2297	TRINITY_DN7096_c2_g1_i1.path1	Pepsico2_Contig7369.path1	TRINITY_DN98028_c0_g1_i1.path1
Pepsico1_Contig6014.path1	TRINITY_DN16832_c0_g1_i4.path1	TRINITY_DN34571_c0_g1_i1.path1	Pepsico1_Contig5972.path2	novel.8371
novel.7733	TRINITY_DN2431_c0_g2_i3.path1	Pepsico2_Contig399.path1	novel.9782	novel.4639
TRINITY_DN58940_c0_g1_i1.path1	novel.4306	Pepsico1_Contig2079.path1	Pepsico2_Contig19485.path1	TRINITY_DN17779_c0_g1_i4.path1
TRINITY_DN32846_c0_g1_i1.path1	novel.4563	TRINITY_DN23360_c0_g1_i1.path3	novel.4343	Pepsico1_Contig1393.path1
TRINITY_DN33532_c0_g1_i1.path3	Pepsico2_Contig16882.path1	TRINITY_DN19482_c0_g1_i2.path1	TRINITY_DN14843_c0_g2_i3.path1	TRINITY_DN4210_c0_g1_i1.path1
Pepsico1_Contig3912.path1	TRINITY_DN11185_c0_g2_i1.path1	Pepsico1_Contig2381.path1	TRINITY_DN13491_c0_g1_i1.path4	TRINITY_DN10183_c0_g2_i1.path2
TRINITY_DN15505_c0_g1_i2.path1	Pepsico2_Contig25.path1	Pepsico1_Contig26025.path1	novel.1409	novel.1751
TRINITY_DN14201_c0_g1_i1.path1	novel.8918	Pepsico1_Contig2275.path2	TRINITY_DN4695_c0_g1_i1.path2	TRINITY_DN45628_c0_g1_i1.path1
Pepsico2_Contig5656.path2	Pepsico2_Contig204.path2	TRINITY_DN40454_c0_g1_i1.path1	TRINITY_DN14372_c0_g1_i1.path2	novel.9835
TRINITY_DN9207_c0_g1_i3.path1	novel.4344	novel.8153	TRINITY_DN26199_c0_g1_i1.path1	TRINITY_DN10315_c0_g3_i9.path1
TRINITY_DN46798_c0_g1_i1.path3	novel.8159	TRINITY_DN11050_c0_g1_i1.path1	novel.4295	TRINITY_DN285_c0_g1_i1.path1
TRINITY_DN9047_c1_g1_i3.path2	TRINITY_DN36019_c1_g1_i1.path1	novel.4602	TRINITY_DN52666_c0_g1_i1.path2	TRINITY_DN44993_c1_g1_i1.path1
novel.4930	Pepsico1_Contig11308.path2	novel.10312	novel.2878	Pepsico2_Contig14734.path1
novel.6227	TRINITY_DN16321_c0_g1_i8.path2	Pepsico1_Contig2589.path1	Pepsico2_Contig3730.path1	TRINITY_DN22585_c0_g2_i2.path1
novel.5975	novel.4583	novel.2796	TRINITY_DN13615_c0_g1_i1.path1	TRINITY_DN1964_c0_g1_i1.path1
TRINITY_DN102182_c0_g1_i1.path1	Pepsico1_Contig1982.path1	novel.115	TRINITY_DN106575_c0_g1_i1.path1	TRINITY_DN13190_c0_g1_i1.path1
novel.7655	TRINITY_DN1568_c0_g1_i3.path1	TRINITY_DN15577_c0_g1_i4.path1	TRINITY_DN37492_c0_g1_i1.path1	TRINITY_DN24832_c0_g2_i4.path1
Pepsico2_Contig21247.path1	novel.2730	Pepsico2_Contig15057.path1	TRINITY_DN27741_c0_g1_i1.path1	TRINITY_DN34359_c0_g1_i1.path1
novel.8845	novel.10510	Pepsico2_Contig2151.path2	TRINITY_DN17692_c1_g1_i2.path1	Pepsico2_Contig12402.path1
TRINITY_DN44727_c0_g1_i1.path1	novel.6107	TRINITY_DN37089_c0_g1_i1.path1	TRINITY_DN45842_c0_g1_i1.path2	TRINITY_DN4590_c1_g1_i1.path3
Pepsico2_Contig16375.path1	TRINITY_DN24041_c1_g1_i2.path1	novel.8591	TRINITY_DN16362_c0_g1_i1.path1	Pepsico2_Contig18022.path2
TRINITY_DN20994_c0_g1_i1.path1	novel.3110	novel.7166	novel.7722	novel.6475
TRINITY_DN23079_c0_g1_i1.path1	Pepsico1_Contig18.path2	TRINITY_DN27881_c3_g1_i1.path1	Pepsico2_Contig5179.path1	Pepsico1_Contig486.path1
TRINITY_DN40521_c0_g1_i2.path1	novel.4719	TRINITY_DN62941_c0_g1_i1.path1	Pepsico1_Contig1236.path1	novel.9946
TRINITY_DN25611_c0_g1_i1.path1	TRINITY_DN9170_c1_g3_i1.path2	novel.4732	novel.4462	Pepsico2_Contig3263.path1
TRINITY_DN82315_c0_g1_i1.path1	Pepsico1_Contig125.path2	TRINITY_DN50831_c0_g1_i1.path1	TRINITY_DN17221_c0_g1_i5.path2	TRINITY_DN77119_c0_g1_i1.path2
novel.5608	novel.9996	TRINITY_DN40419_c0_g1_i1.path1	TRINITY_DN5135_c0_g1_i1.path1	novel.7903
Pepsico1_Contig474.path1	TRINITY_DN28393_c0_g1_i1.path1	novel.7438	TRINITY_DN8260_c0_g1_i9.path1	novel.7521
novel.6958	TRINITY_DN16337_c0_g3_i1.path1	TRINITY_DN28498_c0_g1_i7.path1	TRINITY_DN11247_c0_g2_i4.path1	TRINITY_DN11709_c0_g1_i4.path2
novel.9060	Pepsico2_Contig14270.path1	TRINITY_DN12960_c0_g1_i2.path2	novel.1391	TRINITY_DN31752_c0_g1_i1.path1
novel.3267	TRINITY_DN19573_c0_g1_i1.path1	Pepsico1_Contig8378.path2	novel.756	novel.8781
TRINITY_DN3118_c0_g3_i1.path1	TRINITY_DN33475_c0_g1_i2.path1	Pepsico2_Contig20241.path1	TRINITY_DN10720_c0_g2_i3.path1	TRINITY_DN17303_c0_g4_i2.path1
novel.3970	TRINITY_DN21557_c0_g1_i2.path2	novel.5671	TRINITY_DN16818_c0_g3_i1.path2	TRINITY_DN35676_c0_g1_i1.path2
TRINITY_DN9255_c0_g1_i5.path2	TRINITY_DN33901_c0_g1_i1.path2	Pepsico1_Contig38302.path1	TRINITY_DN5091_c1_g2_i1.path1	TRINITY_DN48262_c0_g1_i1.path2
TRINITY_DN72494_c0_g1_i1.path1	novel.10167	TRINITY_DN15512_c0_g1_i3.path1	Pepsico2_Contig13879.path1	TRINITY_DN15820_c0_g2_i1.path1
TRINITY_DN62866_c0_g1_i1.path1	novel.376	TRINITY_DN26952_c0_g1_i5.path2	Pepsico1_Contig7564.path1	TRINITY_DN29541_c0_g1_i2.path1
Pepsico2_Contig11289.path2	Pepsico2_Contig4728.path1	TRINITY_DN22361_c0_g1_i4.path1	TRINITY_DN12664_c0_g1_i3.path2	Pepsico2_Contig20306.path1
novel.558	TRINITY_DN5876_c0_g1_i1.path1	novel.5420	Pepsico2_Contig12433.path2	novel.1185
TRINITY_DN362_c0_g2_i2.path2	TRINITY_DN3337_c1_g1_i2.path2	TRINITY_DN7005_c0_g1_i4.path1	TRINITY_DN13305_c0_g1_i1.path1	TRINITY_DN7712_c0_g2_i1.path2
Pepsico2_Contig11676.path1	TRINITY_DN5902_c0_g2_i1.path2	TRINITY_DN64527_c0_g1_i1.path2	TRINITY_DN13415_c0_g1_i2.path1	Pepsico1_Contig2427.path1
TRINITY_DN17570_c0_g5_i1.path1	novel.5786	TRINITY_DN114146_c0_g1_i1.path1	TRINITY_DN30577_c0_g1_i1.path1	TRINITY_DN24404_c0_g1_i5.path1
TRINITY_DN30283_c0_g1_i1.path2	TRINITY_DN19759_c0_g2_i2.path1	Pepsico1_Contig10291.path1	Pepsico2_Contig15361.path2	novel.7
TRINITY_DN14072_c0_g1_i13.path2	novel.1468	Pepsico1_Contig3047.path3	Pepsico2_Contig6839.path1	TRINITY_DN50251_c0_g1_i1.path2
novel.9282	TRINITY_DN21617_c0_g2_i2.path1	TRINITY_DN19131_c1_g1_i1.path1	Pepsico2_Contig417.path2	Pepsico1_Contig6293.path1
TRINITY_DN65793_c0_g1_i1.path2	TRINITY_DN5876_c0_g2_i1.path1	novel.4026	Pepsico1_Contig2592.path1	TRINITY_DN36655_c0_g1_i2.path1
novel.7479	Pepsico1_Contig2141.path2	novel.567	TRINITY_DN51081_c0_g1_i1.path1	TRINITY_DN55627_c0_g1_i1.path1
TRINITY_DN9079_c0_g1_i1.path1	Pepsico2_Contig2324.path1	Pepsico1_Contig337.path1	TRINITY_DN16742_c0_g2_i1.path1	novel.4193
TRINITY_DN4136_c0_g1_i3.path2	novel.8741	TRINITY_DN44911_c0_g1_i2.path1	Pepsico1_Contig1872.path1	TRINITY_DN22824_c0_g1_i2.path1
[truncated: 3,118 more rows]

## Sheet: compare bar
compare	all	up	down
BY1vsDY1	8443	4931	3512
BY2vsDY2	8866	5135	3731
[truncated: 3 more rows]
