# Supplementary material for: Using transcriptome sequencing (RNA-Seq) to screen genes involved in β-glucan biosynthesis and accumulation during oat seed development
Source: PeerJ. 2024 Sep 25;12:e17804. doi: 10.7717/peerj.17804 (PMC11438436; doi:10.7717/peerj.17804)
Supplement: Supplemental Information 11 [file peerj-12-17804-s011.xlsx]

## Sheet: BY all DEGs
BY2vsBY1	BY3vsBY1	BY4vsBY1	BY5vsBY1
Pepsico1_Contig1046.path1	Pepsico1_Contig882.path1	Pepsico1_Contig882.path1	Pepsico1_Contig882.path1
Pepsico2_Contig7596.path1	Pepsico1_Contig585.path1	novel.6653	novel.329
TRINITY_DN61132_c0_g1_i1.path1	novel.329	TRINITY_DN24505_c0_g1_i1.path1	Pepsico2_Contig19708.path1
novel.8359	TRINITY_DN20167_c1_g1_i1.path1	novel.415	Pepsico2_Contig20183.path1
TRINITY_DN571_c0_g1_i1.path1	Pepsico2_Contig7935.path1	novel.329	Pepsico2_Contig13121.path1
TRINITY_DN35543_c0_g1_i4.path1	Pepsico2_Contig20183.path1	Pepsico2_Contig7935.path1	Pepsico1_Contig2556.path1
novel.6428	novel.6653	Pepsico1_Contig836.path1	Pepsico2_Contig7935.path1
novel.2929	Pepsico2_Contig13121.path1	novel.1189	novel.415
Pepsico2_Contig14182.path1	TRINITY_DN571_c0_g1_i1.path1	Pepsico2_Contig13121.path1	novel.1189
novel.7991	Pepsico2_Contig7596.path1	novel.3063	Pepsico2_Contig1790.path2
novel.7148	TRINITY_DN17440_c0_g1_i1.path1	Pepsico2_Contig20183.path1	TRINITY_DN1196_c0_g1_i1.path1
novel.3756	Pepsico2_Contig19824.path1	TRINITY_DN571_c0_g1_i1.path1	Pepsico2_Contig7596.path1
TRINITY_DN7772_c0_g1_i4.path1	TRINITY_DN4139_c0_g1_i1.path1	TRINITY_DN4139_c0_g1_i1.path1	TRINITY_DN13294_c0_g1_i1.path1
novel.6653	novel.1189	TRINITY_DN13294_c0_g1_i1.path1	novel.7840
novel.5452	novel.6428	Pepsico2_Contig7596.path1	novel.6653
Pepsico2_Contig18542.path1	TRINITY_DN5937_c0_g1_i5.path1	Pepsico2_Contig14131.path2	Pepsico2_Contig19875.path1
Pepsico2_Contig18053.path1	Pepsico2_Contig19669.path2	Pepsico2_Contig19708.path1	novel.7991
novel.3521	Pepsico2_Contig9426.path1	TRINITY_DN17440_c0_g1_i1.path1	novel.6581
TRINITY_DN2180_c0_g1_i3.path1	Pepsico2_Contig2548.path1	Pepsico1_Contig28824.path2	TRINITY_DN5937_c0_g1_i5.path1
Pepsico1_Contig1034.path1	novel.7991	TRINITY_DN5937_c0_g1_i5.path1	TRINITY_DN452_c0_g1_i2.path1
Pepsico2_Contig3519.path1	TRINITY_DN1196_c0_g1_i1.path1	Pepsico2_Contig1790.path2	Pepsico1_Contig28824.path2
novel.1633	Pepsico1_Contig28824.path2	novel.7840	Pepsico2_Contig17883.path1
TRINITY_DN17440_c0_g1_i1.path1	TRINITY_DN9136_c0_g1_i2.path1	novel.6581	TRINITY_DN24505_c0_g1_i1.path1
TRINITY_DN506_c0_g1_i4.path1	TRINITY_DN27290_c0_g1_i1.path1	novel.8145	TRINITY_DN571_c0_g1_i1.path1
Pepsico2_Contig19114.path1	Pepsico2_Contig20237.path2	novel.2619	Pepsico2_Contig19824.path1
Pepsico2_Contig19875.path1	Pepsico2_Contig17883.path1	novel.7602	TRINITY_DN3870_c0_g1_i1.path1
Pepsico1_Contig28824.path2	Pepsico2_Contig8115.path1	TRINITY_DN1454_c0_g1_i1.path1	TRINITY_DN5316_c0_g1_i5.path1
novel.1107	TRINITY_DN14549_c0_g2_i3.path1	Pepsico2_Contig19669.path2	TRINITY_DN27290_c0_g1_i1.path1
TRINITY_DN506_c0_g1_i4.path2	Pepsico2_Contig3005.path1	TRINITY_DN1196_c0_g1_i1.path1	Pepsico2_Contig19669.path2
TRINITY_DN12207_c0_g1_i1.path1	novel.7840	TRINITY_DN27290_c0_g1_i1.path1	TRINITY_DN1454_c0_g1_i1.path1
Pepsico2_Contig10729.path1	novel.3783	novel.7991	TRINITY_DN17440_c0_g1_i1.path1
TRINITY_DN4139_c0_g1_i1.path1	novel.7767	novel.9577	Pepsico2_Contig17571.path2
Pepsico2_Contig17370.path1	TRINITY_DN13294_c0_g1_i1.path1	TRINITY_DN3469_c0_g1_i3.path1	Pepsico2_Contig20237.path1
novel.4115	novel.9577	novel.3995	Pepsico2_Contig3005.path1
TRINITY_DN3677_c0_g1_i9.path1	novel.3756	Pepsico1_Contig97.path1	novel.7767
TRINITY_DN5937_c0_g1_i5.path1	TRINITY_DN9696_c0_g1_i1.path1	Pepsico2_Contig19824.path1	Pepsico2_Contig2548.path1
TRINITY_DN7691_c0_g1_i1.path2	novel.4958	Pepsico2_Contig17883.path1	TRINITY_DN14545_c0_g1_i1.path2
Pepsico2_Contig7773.path2	Pepsico2_Contig6727.path1	TRINITY_DN14549_c0_g2_i3.path1	TRINITY_DN494_c0_g2_i4.path1
TRINITY_DN1201_c2_g1_i2.path1	TRINITY_DN6009_c0_g1_i6.path1	Pepsico2_Contig6727.path1	Pepsico2_Contig20237.path2
TRINITY_DN53024_c0_g1_i1.path1	Pepsico2_Contig19875.path1	Pepsico2_Contig14131.path1	novel.6428
TRINITY_DN8956_c0_g2_i2.path1	novel.8642	Pepsico2_Contig20237.path2	TRINITY_DN4139_c0_g1_i1.path1
Pepsico2_Contig2548.path1	TRINITY_DN5316_c0_g1_i5.path1	TRINITY_DN5316_c0_g1_i5.path1	Pepsico2_Contig6378.path1
novel.9974	Pepsico2_Contig6148.path1	Pepsico2_Contig19875.path1	novel.3063
Pepsico2_Contig6727.path1	Pepsico2_Contig20237.path1	novel.6428	novel.9577
novel.4958	TRINITY_DN14545_c0_g1_i1.path2	novel.4714	novel.7602
Pepsico2_Contig20237.path1	novel.1671	novel.10099	Pepsico2_Contig14675.path1
TRINITY_DN8602_c0_g1_i4.path1	TRINITY_DN2180_c0_g1_i3.path1	novel.7646	TRINITY_DN15602_c0_g1_i1.path1
TRINITY_DN277_c2_g1_i1.path3	Pepsico1_Contig3571.path1	novel.3783	novel.3756
TRINITY_DN7691_c0_g4_i1.path1	novel.10099	Pepsico2_Contig3005.path1	Pepsico2_Contig6727.path1
Pepsico2_Contig2152.path1	Pepsico2_Contig19114.path1	novel.8642	TRINITY_DN2964_c0_g2_i1.path1
TRINITY_DN9696_c0_g1_i1.path1	TRINITY_DN10471_c0_g2_i1.path1	TRINITY_DN32553_c0_g1_i1.path1	TRINITY_DN17793_c0_g1_i1.path1
Pepsico2_Contig20237.path2	novel.2929	Pepsico2_Contig2548.path1	TRINITY_DN21253_c0_g4_i1.path1
Pepsico2_Contig8789.path1	Pepsico2_Contig17067.path1	novel.7767	novel.10099
novel.5640	Pepsico2_Contig19669.path1	TRINITY_DN494_c0_g2_i4.path1	TRINITY_DN14549_c0_g2_i3.path1
novel.3783	novel.9233	TRINITY_DN302_c0_g1_i4.path1	TRINITY_DN9712_c0_g2_i1.path1
novel.8642	Pepsico2_Contig3519.path1	Pepsico2_Contig14675.path1	novel.8642
Pepsico2_Contig7656.path1	novel.5407	Pepsico2_Contig20237.path1	TRINITY_DN32553_c0_g1_i1.path1
Pepsico1_Contig1025.path1	Pepsico2_Contig18053.path1	Pepsico2_Contig19114.path1	novel.3995
TRINITY_DN5482_c0_g1_i1.path2	novel.3995	novel.6729	Pepsico2_Contig19669.path1
novel.6818	Pepsico2_Contig18542.path1	TRINITY_DN25384_c0_g2_i1.path1	Pepsico1_Contig3571.path1
TRINITY_DN10826_c0_g1_i2.path1	TRINITY_DN10451_c0_g1_i2.path2	Pepsico2_Contig18053.path1	TRINITY_DN2180_c0_g1_i3.path1
Pepsico1_Contig3638.path2	TRINITY_DN556_c0_g1_i1.path3	Pepsico2_Contig9426.path1	TRINITY_DN556_c0_g1_i1.path3
Pepsico2_Contig16947.path1	TRINITY_DN97496_c0_g1_i1.path1	TRINITY_DN17463_c0_g1_i3.path1	Pepsico2_Contig19114.path1
Pepsico2_Contig11248.path1	Pepsico2_Contig14022.path1	Pepsico1_Contig3571.path1	TRINITY_DN10451_c0_g1_i2.path2
Pepsico2_Contig7604.path1	Pepsico2_Contig8789.path1	TRINITY_DN2180_c0_g1_i3.path1	TRINITY_DN9897_c0_g1_i1.path1
Pepsico2_Contig17067.path1	TRINITY_DN10059_c0_g2_i4.path1	novel.3756	TRINITY_DN302_c0_g1_i4.path1
Pepsico2_Contig19669.path2	Pepsico1_Contig1046.path1	TRINITY_DN14545_c0_g1_i1.path2	novel.6818
TRINITY_DN606_c0_g1_i1.path1	novel.6818	TRINITY_DN1753_c0_g1_i1.path1	novel.9233
novel.1189	TRINITY_DN506_c0_g1_i4.path1	TRINITY_DN10605_c0_g1_i2.path1	Pepsico2_Contig12625.path1
novel.6729	TRINITY_DN494_c0_g2_i4.path1	TRINITY_DN2964_c0_g2_i1.path1	TRINITY_DN90811_c0_g1_i1.path1
TRINITY_DN11944_c0_g1_i1.path1	novel.4897	Pepsico2_Contig3519.path1	Pepsico2_Contig3519.path1
TRINITY_DN18638_c0_g3_i1.path1	TRINITY_DN38626_c0_g3_i1.path1	TRINITY_DN10451_c0_g1_i2.path2	Pepsico2_Contig17169.path1
TRINITY_DN14877_c0_g1_i2.path1	TRINITY_DN23526_c0_g1_i1.path1	novel.4958	novel.6729
Pepsico1_Contig4053.path1	novel.4115	TRINITY_DN4494_c0_g2_i2.path1	TRINITY_DN16176_c0_g1_i3.path1
Pepsico2_Contig3005.path1	TRINITY_DN1454_c0_g1_i1.path1	TRINITY_DN9897_c0_g1_i1.path1	Pepsico2_Contig18053.path1
Pepsico2_Contig14825.path1	Pepsico2_Contig4411.path1	novel.6818	novel.8145
Pepsico2_Contig1721.path1	Pepsico2_Contig14675.path1	novel.2693	Pepsico2_Contig11248.path1
novel.2448	TRINITY_DN3469_c0_g1_i3.path1	TRINITY_DN452_c0_g1_i2.path1	Pepsico1_Contig97.path1
novel.4897	Pepsico1_Contig2899.path2	TRINITY_DN6047_c1_g1_i1.path1	Pepsico2_Contig8789.path1
Pepsico1_Contig701.path2	Pepsico2_Contig19708.path1	Pepsico2_Contig17169.path1	Pepsico2_Contig9426.path1
TRINITY_DN22584_c0_g3_i1.path1	Pepsico2_Contig6378.path1	TRINITY_DN556_c0_g1_i1.path3	Pepsico2_Contig17067.path1
TRINITY_DN7687_c0_g1_i2.path1	Pepsico2_Contig4421.path1	novel.7508	novel.2693
novel.4684	TRINITY_DN9897_c0_g1_i1.path1	TRINITY_DN12952_c0_g4_i1.path1	TRINITY_DN23526_c0_g1_i1.path1
TRINITY_DN10059_c0_g2_i4.path1	TRINITY_DN23642_c0_g1_i4.path1	novel.2929	Pepsico2_Contig20393.path1
novel.1260	novel.8929	TRINITY_DN9712_c0_g2_i1.path1	TRINITY_DN16122_c0_g1_i2.path1
novel.5643	TRINITY_DN4498_c0_g1_i10.path1	TRINITY_DN17793_c0_g1_i1.path1	Pepsico2_Contig3304.path1
TRINITY_DN5938_c0_g3_i1.path1	novel.7602	TRINITY_DN15559_c0_g2_i2.path2	novel.4958
TRINITY_DN16286_c0_g1_i4.path1	TRINITY_DN7691_c0_g4_i1.path1	TRINITY_DN1634_c0_g1_i5.path1	TRINITY_DN25384_c0_g2_i1.path1
Pepsico2_Contig1768.path1	Pepsico2_Contig17370.path1	Pepsico2_Contig3304.path1	TRINITY_DN23273_c0_g1_i2.path1
TRINITY_DN14607_c0_g1_i1.path1	novel.4714	Pepsico1_Contig7579.path1	Pepsico1_Contig910.path1
TRINITY_DN10709_c0_g1_i3.path1	TRINITY_DN2964_c0_g2_i1.path1	Pepsico2_Contig11248.path1	novel.4897
Pepsico2_Contig10648.path1	TRINITY_DN12747_c0_g1_i1.path1	TRINITY_DN8043_c0_g1_i2.path1	TRINITY_DN1753_c0_g1_i1.path1
novel.8929	Pepsico2_Contig14182.path1	novel.4897	novel.1288
TRINITY_DN10451_c0_g1_i2.path2	TRINITY_DN1634_c0_g1_i5.path1	Pepsico2_Contig8556.path2	novel.5747
novel.1553	Pepsico2_Contig2152.path1	Pepsico2_Contig18542.path1	Pepsico2_Contig9276.path1
TRINITY_DN14549_c0_g2_i3.path1	Pepsico2_Contig17956.path1	novel.8929	Pepsico2_Contig7699.path1
Pepsico2_Contig8025.path1	novel.6652	Pepsico2_Contig8546.path1	Pepsico2_Contig6611.path4
Pepsico2_Contig12144.path1	Pepsico2_Contig5930.path1	TRINITY_DN14607_c0_g1_i1.path1	Pepsico1_Contig14950.path1
TRINITY_DN7819_c0_g1_i1.path1	Pepsico2_Contig17169.path1	Pepsico1_Contig1514.path1	novel.639
Pepsico2_Contig7520.path1	novel.1288	TRINITY_DN24768_c0_g2_i1.path1	novel.7646
TRINITY_DN12747_c0_g1_i1.path1	TRINITY_DN302_c0_g1_i4.path1	TRINITY_DN16122_c0_g1_i2.path1	TRINITY_DN12_c0_g2_i1.path1
TRINITY_DN30939_c0_g1_i2.path1	novel.415	Pepsico2_Contig19669.path1	TRINITY_DN14607_c0_g1_i1.path1
novel.9609	TRINITY_DN23273_c0_g1_i2.path1	TRINITY_DN23526_c0_g1_i1.path1	novel.2651
Pepsico1_Contig97.path1	Pepsico2_Contig7604.path1	Pepsico2_Contig6148.path1	TRINITY_DN15559_c0_g2_i2.path2
Pepsico2_Contig17883.path1	Pepsico1_Contig3638.path2	Pepsico2_Contig6378.path1	Pepsico2_Contig11059.path1
novel.7593	Pepsico2_Contig14825.path1	Pepsico2_Contig17571.path2	Pepsico2_Contig17114.path1
TRINITY_DN12917_c0_g1_i1.path1	TRINITY_DN4_c0_g1_i6.path1	Pepsico1_Contig14950.path1	Pepsico1_Contig1514.path1
Pepsico2_Contig19415.path1	Pepsico2_Contig6259.path1	novel.639	TRINITY_DN3985_c0_g1_i1.path3
TRINITY_DN46218_c0_g1_i1.path1	Pepsico2_Contig20487.path1	TRINITY_DN10451_c0_g1_i2.path1	Pepsico2_Contig18542.path1
Pepsico2_Contig20286.path2	TRINITY_DN1580_c0_g1_i4.path1	novel.6652	TRINITY_DN12040_c0_g1_i15.path1
TRINITY_DN7819_c0_g1_i1.path2	novel.1582	novel.5923	Pepsico2_Contig20487.path1
novel.4714	Pepsico2_Contig2387.path1	Pepsico2_Contig17067.path1	TRINITY_DN60222_c0_g1_i2.path1
novel.9577	Pepsico2_Contig1768.path1	novel.9909	TRINITY_DN6258_c0_g1_i1.path1
novel.1781	TRINITY_DN35487_c0_g1_i2.path1	TRINITY_DN10471_c0_g2_i1.path2	TRINITY_DN5056_c0_g1_i2.path1
TRINITY_DN302_c0_g1_i4.path1	TRINITY_DN6841_c0_g1_i2.path1	Pepsico2_Contig8789.path1	novel.3783
Pepsico2_Contig10795.path1	TRINITY_DN14594_c0_g1_i1.path2	TRINITY_DN16150_c0_g1_i1.path1	TRINITY_DN24768_c0_g2_i1.path1
novel.5044	Pepsico2_Contig5930.path2	novel.4115	TRINITY_DN3634_c0_g1_i4.path2
TRINITY_DN15095_c0_g1_i1.path1	TRINITY_DN10471_c0_g2_i1.path2	Pepsico2_Contig11059.path1	TRINITY_DN3469_c0_g1_i3.path1
Pepsico2_Contig17114.path1	Pepsico1_Contig2258.path2	TRINITY_DN2833_c0_g2_i1.path1	TRINITY_DN1139_c0_g1_i1.path1
TRINITY_DN1454_c0_g1_i1.path1	TRINITY_DN35543_c0_g1_i4.path1	TRINITY_DN15602_c0_g1_i1.path1	TRINITY_DN34766_c0_g1_i6.path1
Pepsico2_Contig11065.path1	TRINITY_DN10451_c0_g1_i2.path1	TRINITY_DN23273_c0_g1_i2.path1	novel.8037
Pepsico1_Contig2899.path1	TRINITY_DN452_c0_g1_i2.path1	Pepsico2_Contig12625.path1	TRINITY_DN14321_c0_g1_i1.path1
Pepsico2_Contig20182.path1	Pepsico2_Contig14131.path2	novel.8071	Pepsico2_Contig6107.path1
Pepsico2_Contig17946.path1	TRINITY_DN14167_c0_g1_i1.path1	TRINITY_DN41323_c0_g1_i2.path1	novel.5207
novel.5177	novel.5652	Pepsico2_Contig6074.path1	Pepsico1_Contig1024.path1
novel.3399	Pepsico1_Contig97.path1	novel.5747	TRINITY_DN35487_c0_g1_i2.path1
Pepsico2_Contig971.path1	TRINITY_DN8043_c0_g1_i2.path1	Pepsico1_Contig910.path1	TRINITY_DN11598_c0_g1_i1.path1
Pepsico2_Contig11300.path1	novel.2693	Pepsico2_Contig7604.path1	Pepsico2_Contig16939.path1
TRINITY_DN7915_c0_g2_i2.path1	novel.3547	Pepsico2_Contig7831.path1	Pepsico1_Contig7579.path1
TRINITY_DN9897_c0_g1_i1.path1	TRINITY_DN506_c0_g1_i4.path2	TRINITY_DN1580_c0_g1_i4.path1	TRINITY_DN41323_c0_g1_i2.path1
novel.4413	Pepsico1_Contig14950.path1	TRINITY_DN24759_c0_g1_i3.path1	Pepsico2_Contig2152.path1
novel.7646	Pepsico2_Contig10729.path1	TRINITY_DN1139_c0_g1_i1.path1	Pepsico2_Contig17849.path1
TRINITY_DN249_c1_g1_i1.path1	TRINITY_DN41323_c0_g1_i2.path1	novel.2036	TRINITY_DN10738_c0_g1_i1.path1
TRINITY_DN16015_c0_g2_i7.path1	novel.193	novel.1633	TRINITY_DN8043_c0_g1_i2.path1
Pepsico2_Contig7935.path1	TRINITY_DN72_c1_g1_i2.path1	TRINITY_DN90811_c0_g1_i1.path1	TRINITY_DN10752_c0_g1_i1.path1
Pepsico2_Contig7514.path1	novel.7646	TRINITY_DN6841_c0_g1_i2.path1	TRINITY_DN1580_c0_g1_i4.path1
TRINITY_DN41323_c0_g1_i2.path1	novel.5923	Pepsico2_Contig14182.path1	TRINITY_DN13048_c0_g1_i1.path1
TRINITY_DN17273_c0_g1_i1.path1	novel.7508	TRINITY_DN22937_c0_g1_i3.path1	TRINITY_DN72_c1_g1_i2.path1
novel.1417	TRINITY_DN24768_c0_g2_i1.path1	TRINITY_DN3985_c0_g1_i1.path3	Pepsico2_Contig17090.path2
TRINITY_DN10709_c0_g1_i3.path2	TRINITY_DN16122_c0_g1_i2.path1	Pepsico1_Contig1024.path1	TRINITY_DN14014_c1_g1_i1.path1
novel.5409	TRINITY_DN14607_c0_g1_i1.path1	Pepsico1_Contig2899.path1	novel.8619
novel.7767	novel.7137	TRINITY_DN5767_c0_g1_i5.path1	Pepsico2_Contig7827.path1
Pepsico2_Contig19824.path1	novel.7791	TRINITY_DN34205_c0_g1_i1.path3	novel.5189
Pepsico1_Contig3571.path1	Pepsico2_Contig10474.path1	novel.1288	novel.2929
TRINITY_DN5816_c1_g1_i1.path1	Pepsico2_Contig7656.path1	Pepsico2_Contig17114.path1	Pepsico1_Contig585.path1
Pepsico2_Contig11059.path1	TRINITY_DN25384_c0_g2_i1.path1	Pepsico2_Contig17370.path1	novel.1633
Pepsico1_Contig2142.path1	Pepsico2_Contig7699.path1	novel.4684	TRINITY_DN7066_c0_g1_i2.path1
Pepsico2_Contig1180.path1	TRINITY_DN5562_c0_g1_i5.path1	TRINITY_DN10035_c0_g1_i1.path1	TRINITY_DN6150_c0_g1_i3.path1
TRINITY_DN16513_c0_g1_i5.path1	novel.5533	Pepsico2_Contig10474.path1	novel.5407
TRINITY_DN771_c0_g1_i2.path1	Pepsico1_Contig185.path1	Pepsico1_Contig4060.path1	TRINITY_DN59339_c0_g1_i2.path2
Pepsico2_Contig6534.path2	TRINITY_DN9136_c1_g3_i1.path1	TRINITY_DN10059_c0_g2_i4.path1	TRINITY_DN10451_c0_g1_i2.path1
TRINITY_DN20167_c1_g1_i1.path1	Pepsico2_Contig1759.path2	TRINITY_DN16176_c0_g1_i3.path1	TRINITY_DN34195_c0_g1_i2.path1
Pepsico2_Contig11289.path2	novel.4413	TRINITY_DN34195_c0_g1_i2.path1	Pepsico1_Contig743.path1
TRINITY_DN15040_c0_g1_i1.path1	TRINITY_DN7691_c1_g1_i3.path1	novel.6168	TRINITY_DN10059_c0_g2_i4.path1
novel.3126	Pepsico2_Contig1790.path2	Pepsico2_Contig6259.path1	Pepsico2_Contig6777.path1
TRINITY_DN16015_c0_g1_i1.path1	novel.7044	TRINITY_DN9136_c0_g1_i2.path1	Pepsico2_Contig6259.path1
Pepsico2_Contig6074.path1	TRINITY_DN1753_c0_g1_i1.path1	novel.5452	Pepsico2_Contig1842.path1
Pepsico1_Contig5029.path1	Pepsico2_Contig12432.path1	TRINITY_DN7066_c0_g1_i2.path1	TRINITY_DN826_c0_g1_i8.path2
Pepsico1_Contig1037.path1	TRINITY_DN11598_c0_g1_i1.path1	TRINITY_DN12_c0_g2_i1.path1	novel.4413
Pepsico2_Contig12144.path2	Pepsico1_Contig1320.path1	Pepsico2_Contig5904.path1	novel.6168
Pepsico1_Contig2677.path1	Pepsico2_Contig17114.path1	novel.1417	Pepsico2_Contig17090.path1
TRINITY_DN8132_c0_g1_i1.path1	TRINITY_DN2833_c0_g2_i1.path1	TRINITY_DN8849_c1_g1_i7.path1	Pepsico2_Contig7604.path1
TRINITY_DN1196_c0_g1_i1.path1	TRINITY_DN842_c0_g1_i1.path1	TRINITY_DN12952_c0_g5_i1.path1	Pepsico2_Contig7831.path1
Pepsico2_Contig7773.path1	Pepsico2_Contig20182.path1	TRINITY_DN8956_c0_g2_i2.path1	novel.1671
TRINITY_DN28145_c0_g3_i2.path1	novel.2651	TRINITY_DN24907_c0_g1_i4.path1	novel.7228
TRINITY_DN7472_c0_g1_i1.path1	novel.2619	Pepsico2_Contig1842.path1	Pepsico2_Contig4918.path1
Pepsico2_Contig135.path1	TRINITY_DN11944_c0_g1_i1.path1	Pepsico2_Contig6611.path4	Pepsico1_Contig185.path1
TRINITY_DN5076_c0_g1_i5.path1	TRINITY_DN6258_c0_g1_i1.path1	TRINITY_DN34766_c0_g1_i6.path1	TRINITY_DN11005_c1_g1_i2.path1
Pepsico2_Contig14558.path1	TRINITY_DN6047_c1_g1_i1.path1	novel.6785	novel.4450
novel.10099	TRINITY_DN21357_c0_g1_i1.path1	TRINITY_DN15095_c0_g1_i1.path1	Pepsico1_Contig195.path1
Pepsico1_Contig1433.path1	novel.5452	TRINITY_DN17793_c0_g3_i2.path1	TRINITY_DN25624_c0_g1_i4.path1
Pepsico2_Contig17794.path1	TRINITY_DN10709_c0_g1_i3.path2	novel.4450	TRINITY_DN2960_c0_g1_i1.path1
TRINITY_DN13323_c0_g2_i1.path1	TRINITY_DN1201_c2_g1_i2.path1	Pepsico2_Contig2387.path1	TRINITY_DN17793_c0_g3_i2.path1
Pepsico2_Contig18178.path1	TRINITY_DN10605_c0_g1_i2.path1	Pepsico2_Contig20182.path1	TRINITY_DN10242_c0_g1_i5.path1
Pepsico2_Contig7699.path1	TRINITY_DN38179_c0_g1_i1.path1	Pepsico1_Contig185.path1	novel.7137
TRINITY_DN13294_c0_g1_i1.path1	TRINITY_DN17793_c0_g1_i1.path1	Pepsico2_Contig12432.path1	TRINITY_DN751_c0_g1_i3.path2
TRINITY_DN3393_c0_g1_i2.path1	Pepsico2_Contig17090.path2	TRINITY_DN20133_c0_g1_i3.path1	novel.4758
TRINITY_DN5857_c0_g1_i1.path1	novel.8103	Pepsico2_Contig7514.path1	Pepsico2_Contig17370.path1
TRINITY_DN21832_c0_g1_i1.path1	TRINITY_DN9712_c0_g2_i1.path1	novel.7228	TRINITY_DN29620_c1_g1_i2.path1
TRINITY_DN11017_c0_g2_i4.path3	TRINITY_DN61132_c0_g1_i1.path1	Pepsico2_Contig2152.path1	Pepsico1_Contig2258.path2
TRINITY_DN496_c0_g1_i1.path1	TRINITY_DN12207_c0_g1_i1.path1	novel.4413	Pepsico1_Contig836.path1
TRINITY_DN10467_c0_g1_i3.path1	TRINITY_DN90811_c0_g1_i1.path1	Pepsico2_Contig12144.path1	Pepsico1_Contig4060.path1
Pepsico2_Contig14213.path1	TRINITY_DN17463_c0_g1_i3.path1	Pepsico2_Contig17305.path4	TRINITY_DN5180_c0_g2_i3.path1
TRINITY_DN10389_c0_g1_i1.path2	TRINITY_DN106836_c0_g1_i1.path1	TRINITY_DN14321_c0_g1_i1.path1	TRINITY_DN7630_c0_g1_i1.path3
Pepsico1_Contig14950.path1	Pepsico2_Contig17090.path1	Pepsico2_Contig20487.path1	TRINITY_DN11944_c0_g1_i1.path1
TRINITY_DN10605_c0_g1_i2.path1	novel.5717	Pepsico2_Contig7699.path1	TRINITY_DN236_c0_g1_i2.path1
novel.9233	Pepsico2_Contig7773.path2	TRINITY_DN5174_c1_g1_i2.path1	Pepsico2_Contig12432.path1
TRINITY_DN6139_c0_g2_i2.path1	Pepsico2_Contig6777.path1	Pepsico2_Contig20286.path2	novel.3628
TRINITY_DN21656_c0_g1_i1.path2	TRINITY_DN12952_c0_g4_i1.path1	TRINITY_DN35487_c0_g1_i2.path1	novel.2036
novel.1098	TRINITY_DN43075_c0_g1_i2.path1	Pepsico2_Contig3085.path1	Pepsico2_Contig10474.path1
TRINITY_DN27335_c0_g1_i1.path1	TRINITY_DN754_c0_g1_i2.path1	TRINITY_DN14356_c1_g1_i10.path2	novel.1582
Pepsico2_Contig3465.path1	Pepsico2_Contig12144.path1	novel.4758	TRINITY_DN4812_c0_g2_i2.path1
Pepsico1_Contig37308.path1	TRINITY_DN22937_c0_g1_i3.path1	Pepsico1_Contig5029.path1	Pepsico2_Contig6456.path1
Pepsico1_Contig882.path1	Pepsico2_Contig3465.path1	Pepsico2_Contig16939.path1	TRINITY_DN21931_c0_g1_i2.path1
TRINITY_DN19898_c0_g5_i2.path1	Pepsico2_Contig20286.path2	novel.2550	novel.1627
Pepsico2_Contig10795.path2	TRINITY_DN47113_c0_g3_i1.path1	novel.9233	Pepsico1_Contig2899.path2
TRINITY_DN83983_c0_g1_i1.path1	TRINITY_DN28452_c0_g1_i8.path1	TRINITY_DN7691_c0_g4_i1.path1	TRINITY_DN15198_c0_g1_i2.path2
TRINITY_DN15095_c0_g1_i1.path2	Pepsico2_Contig7520.path1	TRINITY_DN2385_c0_g1_i1.path2	Pepsico2_Contig2387.path1
TRINITY_DN1580_c0_g1_i4.path1	TRINITY_DN53024_c0_g1_i1.path1	novel.3530	Pepsico2_Contig5904.path1
TRINITY_DN24768_c0_g2_i1.path1	TRINITY_DN20133_c0_g1_i3.path1	TRINITY_DN72_c1_g1_i2.path1	Pepsico2_Contig12076.path1
Pepsico2_Contig13099.path1	Pepsico1_Contig2444.path1	TRINITY_DN969_c0_g2_i1.path1	TRINITY_DN7981_c0_g2_i2.path1
TRINITY_DN27290_c0_g1_i1.path1	TRINITY_DN37282_c0_g1_i1.path2	novel.8037	TRINITY_DN23943_c0_g5_i1.path1
novel.5533	Pepsico1_Contig2258.path1	TRINITY_DN6258_c0_g1_i1.path1	Pepsico2_Contig4435.path1
novel.9736	TRINITY_DN43686_c0_g1_i1.path1	novel.2651	novel.1560
TRINITY_DN21428_c0_g1_i3.path1	TRINITY_DN12040_c0_g1_i15.path1	Pepsico1_Contig2899.path2	Pepsico2_Contig19157.path1
Pepsico2_Contig16793.path1	Pepsico2_Contig14131.path1	novel.5533	Pepsico2_Contig19795.path1
novel.4067	novel.8359	Pepsico1_Contig37308.path1	TRINITY_DN53024_c0_g1_i1.path1
Pepsico2_Contig3085.path1	novel.5183	TRINITY_DN23943_c0_g5_i1.path1	TRINITY_DN754_c0_g1_i2.path1
Pepsico2_Contig9899.path1	Pepsico2_Contig971.path1	Pepsico2_Contig12144.path2	novel.258
Pepsico2_Contig17681.path1	novel.1417	novel.7137	Pepsico2_Contig6237.path1
TRINITY_DN3985_c0_g1_i1.path3	TRINITY_DN17812_c0_g1_i4.path1	novel.4346	Pepsico2_Contig8546.path1
TRINITY_DN44649_c0_g1_i1.path1	TRINITY_DN13432_c0_g1_i1.path1	TRINITY_DN10738_c0_g1_i1.path1	TRINITY_DN1634_c0_g1_i5.path1
TRINITY_DN25287_c0_g2_i1.path1	TRINITY_DN15040_c0_g1_i1.path1	Pepsico2_Contig1759.path2	Pepsico1_Contig2899.path1
TRINITY_DN9385_c2_g1_i1.path1	novel.7148	Pepsico2_Contig17090.path2	Pepsico2_Contig18112.path1
Pepsico2_Contig17521.path1	Pepsico2_Contig16939.path1	TRINITY_DN17812_c0_g1_i4.path1	novel.5611
TRINITY_DN54245_c0_g1_i1.path1	Pepsico2_Contig13099.path1	TRINITY_DN13048_c0_g1_i1.path1	novel.7441
TRINITY_DN14549_c0_g1_i5.path1	TRINITY_DN7691_c0_g1_i1.path2	Pepsico1_Contig2134.path1	novel.7477
novel.9687	TRINITY_DN38367_c0_g1_i1.path1	Pepsico1_Contig1320.path1	TRINITY_DN22284_c0_g2_i1.path1
Pepsico2_Contig20183.path1	TRINITY_DN43075_c0_g1_i2.path3	TRINITY_DN11005_c1_g1_i2.path1	TRINITY_DN9890_c0_g1_i6.path1
Pepsico1_Contig7138.path1	Pepsico1_Contig473.path1	Pepsico2_Contig6107.path1	TRINITY_DN48507_c0_g1_i1.path1
TRINITY_DN26262_c0_g1_i1.path1	TRINITY_DN12_c0_g2_i1.path1	TRINITY_DN13998_c0_g2_i1.path1	TRINITY_DN6841_c0_g1_i2.path1
TRINITY_DN3582_c0_g1_i2.path2	TRINITY_DN29620_c1_g1_i2.path1	TRINITY_DN6150_c0_g1_i3.path1	novel.1476
Pepsico2_Contig3536.path1	Pepsico2_Contig4918.path1	novel.5407	TRINITY_DN14549_c0_g1_i5.path1
TRINITY_DN9701_c0_g1_i1.path1	Pepsico2_Contig17521.path1	Pepsico2_Contig17849.path1	novel.8929
Pepsico1_Contig3021.path1	TRINITY_DN18468_c0_g1_i6.path1	Pepsico1_Contig5974.path1	novel.7949
TRINITY_DN17812_c0_g1_i4.path1	TRINITY_DN22284_c0_g2_i1.path1	Pepsico2_Contig6777.path1	novel.2550
Pepsico2_Contig17958.path1	Pepsico1_Contig836.path1	Pepsico2_Contig12076.path1	novel.5452
TRINITY_DN60462_c0_g1_i1.path1	TRINITY_DN24505_c0_g1_i1.path1	novel.1560	novel.3530
novel.1638	TRINITY_DN8956_c0_g2_i2.path1	TRINITY_DN59339_c0_g1_i2.path2	Pepsico2_Contig6237.path2
Pepsico2_Contig16834.path1	TRINITY_DN60222_c0_g1_i2.path1	Pepsico2_Contig3465.path1	TRINITY_DN30113_c1_g1_i1.path1
TRINITY_DN16801_c1_g1_i1.path2	novel.660	TRINITY_DN11598_c0_g1_i1.path1	novel.2822
TRINITY_DN2964_c0_g2_i1.path1	TRINITY_DN14594_c0_g2_i1.path1	TRINITY_DN3582_c0_g1_i2.path2	TRINITY_DN28452_c0_g1_i8.path1
TRINITY_DN22741_c0_g2_i2.path1	Pepsico2_Contig6074.path1	novel.7076	novel.6785
Pepsico2_Contig5226.path1	Pepsico2_Contig17946.path1	Pepsico2_Contig7984.path2	novel.5209
novel.826	Pepsico2_Contig8062.path1	Pepsico2_Contig10729.path1	Pepsico2_Contig6148.path1
Pepsico2_Contig8546.path1	Pepsico2_Contig17563.path2	novel.7441	TRINITY_DN19092_c0_g2_i1.path1
Pepsico2_Contig4880.path1	Pepsico2_Contig6456.path1	TRINITY_DN10752_c0_g1_i1.path1	TRINITY_DN5220_c0_g1_i1.path1
TRINITY_DN80132_c0_g1_i1.path1	TRINITY_DN14549_c0_g1_i5.path1	novel.7791	TRINITY_DN5562_c0_g1_i5.path1
TRINITY_DN91808_c0_g1_i1.path1	Pepsico2_Contig17438.path1	TRINITY_DN3567_c0_g2_i2.path1	TRINITY_DN2385_c0_g1_i1.path2
novel.2457	novel.9968	novel.4440	Pepsico2_Contig17946.path1
TRINITY_DN7691_c0_g2_i1.path1	TRINITY_DN14594_c0_g1_i1.path1	Pepsico2_Contig17090.path1	TRINITY_DN22937_c0_g1_i3.path1
Pepsico2_Contig9970.path1	TRINITY_DN2960_c0_g1_i1.path1	Pepsico2_Contig4421.path1	TRINITY_DN4714_c0_g1_i9.path1
novel.2651	TRINITY_DN12952_c0_g5_i1.path1	TRINITY_DN8602_c0_g1_i4.path1	novel.5230
Pepsico2_Contig17618.path2	novel.1622	TRINITY_DN12040_c0_g1_i15.path1	TRINITY_DN11593_c1_g1_i7.path1
novel.6992	TRINITY_DN4812_c0_g2_i2.path1	novel.1863	TRINITY_DN10035_c0_g1_i1.path1
Pepsico2_Contig14912.path1	Pepsico1_Contig1269.path1	TRINITY_DN577_c0_g1_i8.path1	Pepsico2_Contig15323.path1
TRINITY_DN22120_c0_g1_i4.path1	novel.9974	TRINITY_DN15251_c0_g1_i1.path1	TRINITY_DN2960_c0_g2_i1.path1
Pepsico2_Contig18089.path1	Pepsico1_Contig4060.path1	novel.1582	Pepsico2_Contig19129.path1
Pepsico2_Contig1759.path2	TRINITY_DN3985_c0_g1_i1.path3	TRINITY_DN4812_c0_g2_i2.path1	Pepsico2_Contig3465.path1
Pepsico2_Contig3449.path1	TRINITY_DN38217_c0_g1_i1.path1	TRINITY_DN16373_c0_g2_i1.path1	TRINITY_DN32968_c0_g1_i1.path1
novel.5900	TRINITY_DN21656_c0_g1_i1.path2	novel.5717	TRINITY_DN10815_c0_g2_i1.path1
Pepsico2_Contig17169.path1	Pepsico2_Contig6534.path2	TRINITY_DN14594_c0_g1_i1.path2	novel.6652
TRINITY_DN14321_c0_g1_i1.path1	TRINITY_DN43075_c0_g1_i2.path2	Pepsico2_Contig4539.path1	Pepsico2_Contig15237.path1
Pepsico2_Contig17849.path1	Pepsico2_Contig7831.path1	TRINITY_DN27443_c0_g1_i1.path1	Pepsico1_Contig3224.path1
novel.7137	TRINITY_DN4491_c1_g1_i6.path1	TRINITY_DN14594_c0_g1_i1.path1	TRINITY_DN16373_c0_g2_i1.path1
TRINITY_DN10389_c0_g1_i1.path1	Pepsico1_Contig701.path2	TRINITY_DN4506_c0_g1_i2.path1	Pepsico1_Contig5974.path1
Pepsico2_Contig20342.path1	Pepsico1_Contig1534.path1	novel.6711	Pepsico2_Contig12144.path2
Pepsico2_Contig2890.path1	TRINITY_DN5904_c0_g1_i3.path1	TRINITY_DN5220_c0_g1_i1.path1	novel.2619
novel.4317	Pepsico2_Contig18037.path1	TRINITY_DN11944_c0_g1_i1.path1	novel.6711
TRINITY_DN23273_c0_g1_i2.path1	Pepsico1_Contig5029.path1	Pepsico2_Contig8136.path1	Pepsico2_Contig17438.path1
novel.6170	Pepsico2_Contig5650.path1	TRINITY_DN60222_c0_g1_i2.path1	TRINITY_DN4515_c0_g1_i17.path1
novel.4631	Pepsico2_Contig10033.path1	TRINITY_DN25624_c0_g1_i4.path1	novel.5533
TRINITY_DN58767_c0_g1_i1.path1	TRINITY_DN2389_c0_g1_i4.path1	TRINITY_DN3634_c0_g1_i4.path2	Pepsico2_Contig7514.path1
novel.7067	TRINITY_DN2053_c0_g1_i15.path1	novel.9968	TRINITY_DN106297_c0_g1_i1.path1
TRINITY_DN60222_c0_g1_i2.path1	TRINITY_DN5220_c0_g1_i1.path1	Pepsico1_Contig2556.path1	novel.4115
Pepsico2_Contig12625.path1	Pepsico1_Contig5974.path1	TRINITY_DN15040_c0_g1_i1.path1	novel.3129
TRINITY_DN27295_c0_g1_i1.path1	novel.4440	TRINITY_DN3489_c0_g1_i2.path1	novel.660
TRINITY_DN21253_c0_g4_i1.path1	novel.4354	TRINITY_DN8509_c0_g1_i3.path1	novel.7111
Pepsico2_Contig16776.path1	novel.8037	Pepsico2_Contig4432.path1	Pepsico2_Contig6417.path1
TRINITY_DN23526_c0_g1_i1.path1	Pepsico2_Contig6148.path2	Pepsico2_Contig6534.path2	TRINITY_DN14533_c0_g1_i4.path1
Pepsico2_Contig6148.path2	TRINITY_DN8509_c0_g1_i3.path1	TRINITY_DN15198_c0_g1_i2.path2	Pepsico2_Contig7277.path2
Pepsico2_Contig3304.path1	TRINITY_DN5174_c1_g1_i2.path1	TRINITY_DN29620_c1_g1_i2.path1	Pepsico2_Contig7773.path2
Pepsico2_Contig7605.path1	novel.1553	Pepsico2_Contig17438.path1	novel.4684
Pepsico1_Contig2444.path1	Pepsico2_Contig12144.path2	TRINITY_DN277_c2_g1_i1.path3	TRINITY_DN2389_c0_g1_i4.path1
novel.8054	TRINITY_DN13998_c0_g2_i1.path1	Pepsico2_Contig6456.path1	novel.4381
TRINITY_DN20133_c0_g1_i3.path1	TRINITY_DN15559_c0_g2_i2.path2	novel.5611	novel.5923
Pepsico2_Contig5308.path1	Pepsico2_Contig17563.path1	TRINITY_DN10242_c0_g1_i5.path1	Pepsico2_Contig9970.path1
TRINITY_DN13048_c0_g1_i1.path1	TRINITY_DN15251_c0_g1_i1.path1	Pepsico2_Contig18037.path1	novel.8506
TRINITY_DN2389_c0_g1_i4.path1	TRINITY_DN4139_c0_g2_i1.path1	Pepsico2_Contig19129.path1	TRINITY_DN19166_c0_g1_i6.path1
TRINITY_DN44508_c0_g1_i1.path1	Pepsico2_Contig17849.path1	Pepsico2_Contig19795.path1	novel.7791
Pepsico2_Contig779.path1	novel.3399	Pepsico2_Contig4435.path1	novel.7076
TRINITY_DN3180_c0_g2_i1.path1	TRINITY_DN6139_c0_g2_i2.path1	novel.1064	novel.6796
novel.2291	Pepsico2_Contig4152.path1	Pepsico2_Contig4918.path1	Pepsico2_Contig12144.path1
TRINITY_DN53024_c0_g1_i1.path2	Pepsico2_Contig8546.path1	TRINITY_DN11593_c1_g1_i7.path1	TRINITY_DN652_c0_g1_i1.path1
Pepsico2_Contig17149.path1	TRINITY_DN13048_c0_g1_i1.path1	TRINITY_DN5938_c0_g3_i1.path1	Pepsico2_Contig6288.path1
Pepsico2_Contig20286.path1	Pepsico2_Contig779.path1	TRINITY_DN5180_c0_g2_i3.path1	Pepsico1_Contig5243.path1
TRINITY_DN28234_c1_g1_i1.path1	Pepsico1_Contig2275.path2	TRINITY_DN2960_c0_g1_i1.path1	TRINITY_DN5321_c0_g1_i10.path1
TRINITY_DN79503_c0_g1_i1.path1	Pepsico2_Contig3449.path1	TRINITY_DN15073_c0_g1_i2.path1	TRINITY_DN16936_c0_g1_i1.path1
TRINITY_DN12178_c0_g1_i2.path1	Pepsico2_Contig3722.path1	TRINITY_DN10815_c0_g2_i1.path1	Pepsico2_Contig7372.path1
TRINITY_DN3262_c0_g1_i4.path1	Pepsico2_Contig9040.path1	Pepsico2_Contig6417.path1	TRINITY_DN9659_c0_g2_i1.path1
TRINITY_DN19139_c0_g1_i1.path1	TRINITY_DN88881_c0_g1_i1.path1	TRINITY_DN24307_c0_g1_i1.path1	TRINITY_DN1580_c0_g1_i4.path2
TRINITY_DN45181_c0_g1_i2.path1	novel.2074	TRINITY_DN53024_c0_g1_i1.path1	TRINITY_DN21428_c0_g1_i3.path1
novel.6131	TRINITY_DN3543_c0_g3_i1.path1	Pepsico2_Contig17946.path1	TRINITY_DN37338_c0_g1_i3.path1
TRINITY_DN24481_c0_g1_i3.path1	TRINITY_DN751_c0_g1_i3.path2	TRINITY_DN13217_c1_g1_i1.path1	TRINITY_DN38217_c0_g1_i1.path1
novel.2550	TRINITY_DN45181_c0_g1_i2.path1	TRINITY_DN38217_c0_g1_i1.path1	TRINITY_DN320_c2_g1_i1.path2
Pepsico2_Contig9426.path1	TRINITY_DN4125_c0_g1_i3.path1	novel.8619	Pepsico2_Contig19649.path2
novel.7602	Pepsico1_Contig743.path1	Pepsico2_Contig1744.path2	TRINITY_DN10241_c1_g3_i1.path1
TRINITY_DN9952_c0_g3_i1.path1	novel.8805	TRINITY_DN3543_c0_g3_i1.path1	Pepsico1_Contig2134.path1
Pepsico2_Contig8115.path1	Pepsico2_Contig19129.path1	novel.2193	novel.1229
TRINITY_DN9749_c0_g1_i1.path1	TRINITY_DN30113_c1_g1_i1.path1	TRINITY_DN754_c0_g1_i2.path1	Pepsico2_Contig3476.path1
novel.5209	TRINITY_DN33313_c0_g2_i2.path1	Pepsico2_Contig5650.path1	novel.732
novel.2402	Pepsico2_Contig1842.path1	Pepsico2_Contig13099.path1	TRINITY_DN431_c0_g1_i7.path2
TRINITY_DN13657_c0_g1_i2.path1	novel.5044	Pepsico2_Contig7827.path1	Pepsico2_Contig20182.path1
Pepsico1_Contig3448.path1	novel.5409	TRINITY_DN30636_c0_g1_i3.path1	TRINITY_DN19139_c0_g1_i1.path1
TRINITY_DN37508_c0_g1_i2.path1	TRINITY_DN16150_c0_g1_i1.path1	TRINITY_DN3174_c1_g1_i2.path1	TRINITY_DN97496_c0_g1_i1.path1
novel.2226	Pepsico2_Contig7827.path1	Pepsico2_Contig550.path1	TRINITY_DN25384_c0_g2_i1.path3
TRINITY_DN14489_c0_g1_i1.path1	Pepsico1_Contig1873.path2	Pepsico1_Contig3350.path2	Pepsico2_Contig5650.path1
TRINITY_DN22937_c0_g1_i3.path1	TRINITY_DN25624_c0_g1_i4.path1	Pepsico2_Contig5226.path1	Pepsico1_Contig1269.path1
TRINITY_DN36019_c1_g1_i1.path2	TRINITY_DN9385_c2_g1_i1.path1	TRINITY_DN3394_c1_g1_i3.path1	TRINITY_DN55287_c0_g1_i1.path3
TRINITY_DN10286_c0_g1_i2.path1	Pepsico2_Contig660.path1	Pepsico1_Contig1534.path1	TRINITY_DN9136_c0_g1_i2.path1
novel.5451	TRINITY_DN2492_c0_g1_i1.path1	novel.4381	novel.6394
Pepsico2_Contig4693.path1	Pepsico2_Contig11259.path1	TRINITY_DN4887_c0_g1_i6.path1	Pepsico1_Contig3350.path2
TRINITY_DN4289_c0_g2_i1.path2	novel.7029	TRINITY_DN97496_c0_g1_i1.path1	TRINITY_DN5321_c0_g1_i10.path2
TRINITY_DN24212_c0_g1_i1.path1	Pepsico2_Contig1180.path1	Pepsico2_Contig6237.path2	TRINITY_DN26096_c0_g1_i4.path1
TRINITY_DN14274_c1_g1_i7.path2	novel.2442	novel.6796	TRINITY_DN506_c0_g1_i4.path2
TRINITY_DN29954_c0_g1_i1.path1	novel.1863	TRINITY_DN2960_c0_g2_i1.path1	Pepsico2_Contig13099.path1
Pepsico2_Contig4408.path1	novel.1098	TRINITY_DN17829_c0_g1_i1.path2	novel.5740
Pepsico1_Contig29309.path1	novel.6711	Pepsico2_Contig6237.path1	TRINITY_DN17463_c0_g1_i3.path1
novel.4381	Pepsico2_Contig3315.path1	TRINITY_DN2389_c0_g1_i4.path1	TRINITY_DN15239_c0_g1_i10.path1
Pepsico2_Contig19350.path1	TRINITY_DN34205_c0_g1_i1.path3	novel.5189	TRINITY_DN2455_c1_g1_i5.path1
novel.6994	novel.2036	Pepsico1_Contig2258.path2	novel.5700
TRINITY_DN25120_c0_g1_i1.path1	TRINITY_DN6877_c0_g1_i1.path1	TRINITY_DN14594_c0_g2_i1.path1	TRINITY_DN16373_c0_g1_i1.path1
Pepsico1_Contig2899.path2	Pepsico2_Contig11059.path1	TRINITY_DN3331_c0_g1_i1.path1	TRINITY_DN4515_c0_g1_i17.path3
Pepsico2_Contig18011.path1	novel.5747	Pepsico1_Contig6507.path1	Pepsico2_Contig1759.path2
Pepsico2_Contig12432.path1	Pepsico2_Contig19604.path1	TRINITY_DN32968_c0_g1_i1.path1	Pepsico2_Contig4432.path1
novel.2977	Pepsico2_Contig14213.path1	novel.7029	TRINITY_DN1928_c0_g1_i7.path1
novel.678	novel.8619	Pepsico1_Contig1269.path1	novel.2798
TRINITY_DN13998_c0_g2_i1.path1	Pepsico2_Contig20048.path1	TRINITY_DN1105_c0_g1_i2.path1	Pepsico2_Contig20048.path1
novel.8144	Pepsico2_Contig11065.path1	Pepsico1_Contig865.path1	novel.1863
TRINITY_DN29620_c1_g1_i2.path1	novel.8499	TRINITY_DN14549_c0_g1_i5.path1	Pepsico2_Contig779.path1
Pepsico2_Contig7893.path1	novel.1260	TRINITY_DN4498_c0_g1_i10.path1	TRINITY_DN14356_c1_g1_i10.path2
Pepsico1_Contig1873.path2	TRINITY_DN3870_c0_g1_i1.path1	TRINITY_DN7691_c1_g1_i3.path1	TRINITY_DN6751_c0_g1_i5.path1
novel.1768	TRINITY_DN2960_c0_g2_i1.path1	Pepsico2_Contig7773.path2	TRINITY_DN22077_c0_g1_i12.path2
Pepsico2_Contig3476.path1	TRINITY_DN62134_c2_g1_i1.path1	TRINITY_DN5562_c0_g1_i5.path1	TRINITY_DN15198_c0_g3_i1.path1
TRINITY_DN15282_c0_g1_i1.path1	novel.7604	TRINITY_DN30113_c1_g1_i1.path1	TRINITY_DN53024_c0_g1_i1.path2
Pepsico1_Contig1269.path1	TRINITY_DN14321_c0_g1_i1.path1	TRINITY_DN34195_c0_g1_i2.path2	TRINITY_DN52891_c0_g1_i1.path1
TRINITY_DN34243_c1_g1_i1.path1	TRINITY_DN10035_c0_g1_i1.path1	Pepsico2_Contig14808.path1	TRINITY_DN2492_c0_g1_i1.path1
TRINITY_DN112522_c0_g1_i1.path1	novel.8054	Pepsico2_Contig13844.path1	novel.3259
novel.8363	TRINITY_DN78952_c0_g1_i1.path1	TRINITY_DN16045_c1_g1_i4.path1	Pepsico1_Contig6901.path2
Pepsico2_Contig6259.path1	Pepsico1_Contig4053.path1	TRINITY_DN11938_c0_g1_i1.path1	TRINITY_DN7691_c1_g1_i3.path1
TRINITY_DN7830_c0_g1_i1.path1	TRINITY_DN24759_c0_g1_i3.path1	TRINITY_DN16295_c0_g1_i1.path2	TRINITY_DN2053_c0_g1_i15.path1
TRINITY_DN13498_c0_g2_i1.path1	TRINITY_DN7356_c0_g1_i8.path1	Pepsico2_Contig7372.path1	TRINITY_DN17829_c0_g1_i1.path2
novel.10016	TRINITY_DN373_c0_g2_i8.path1	TRINITY_DN28452_c0_g1_i8.path1	TRINITY_DN4172_c0_g1_i16.path1
TRINITY_DN44751_c0_g1_i1.path1	Pepsico2_Contig5976.path1	TRINITY_DN22284_c0_g2_i1.path1	novel.5549
TRINITY_DN10451_c0_g1_i2.path1	TRINITY_DN10752_c0_g1_i1.path1	TRINITY_DN16572_c0_g1_i1.path1	novel.4440
novel.3002	TRINITY_DN10738_c0_g1_i1.path1	TRINITY_DN17578_c0_g1_i2.path1	novel.9909
TRINITY_DN13826_c0_g1_i3.path1	Pepsico2_Contig16793.path1	novel.8359	Pepsico2_Contig14131.path1
novel.7021	TRINITY_DN34195_c0_g1_i2.path1	Pepsico1_Contig771.path1	TRINITY_DN9696_c0_g1_i1.path1
Pepsico1_Contig865.path1	novel.4684	Pepsico1_Contig6901.path2	Pepsico2_Contig8136.path1
TRINITY_DN21607_c0_g3_i3.path1	TRINITY_DN11593_c1_g1_i7.path1	novel.660	Pepsico2_Contig6463.path1
novel.8805	Pepsico2_Contig14912.path1	novel.2	TRINITY_DN10097_c0_g1_i2.path1
novel.8619	Pepsico2_Contig19157.path1	TRINITY_DN506_c0_g1_i4.path2	Pepsico2_Contig660.path1
TRINITY_DN24065_c0_g1_i1.path1	TRINITY_DN7691_c0_g2_i1.path1	Pepsico2_Contig779.path1	TRINITY_DN4139_c0_g2_i1.path1
TRINITY_DN23642_c0_g2_i1.path1	TRINITY_DN27295_c0_g1_i1.path1	Pepsico1_Contig1025.path1	Pepsico2_Contig19859.path1
TRINITY_DN9291_c0_g1_i1.path1	novel.5451	Pepsico1_Contig5243.path1	TRINITY_DN16522_c0_g1_i3.path1
TRINITY_DN17793_c0_g1_i1.path1	TRINITY_DN29565_c0_g1_i3.path3	Pepsico1_Contig37830.path1	TRINITY_DN16572_c0_g1_i1.path1
TRINITY_DN7830_c0_g2_i1.path1	novel.1781	TRINITY_DN21931_c0_g1_i2.path1	TRINITY_DN10242_c0_g1_i5.path2
Pepsico1_Contig1795.path1	TRINITY_DN43155_c0_g1_i1.path1	novel.1627	TRINITY_DN3174_c1_g1_i2.path1
TRINITY_DN16767_c0_g1_i2.path1	Pepsico1_Contig1514.path1	TRINITY_DN1397_c0_g3_i1.path1	novel.3594
TRINITY_DN23642_c0_g1_i4.path1	TRINITY_DN11005_c1_g1_i2.path1	Pepsico2_Contig8025.path1	Pepsico2_Contig8025.path1
TRINITY_DN106836_c0_g1_i1.path1	TRINITY_DN577_c0_g1_i8.path1	TRINITY_DN4515_c0_g1_i17.path1	TRINITY_DN34195_c0_g1_i2.path2
Pepsico1_Contig2382.path3	TRINITY_DN1766_c0_g2_i2.path1	TRINITY_DN9438_c1_g1_i1.path1	novel.1576
TRINITY_DN50606_c0_g1_i1.path1	TRINITY_DN6150_c0_g1_i3.path1	novel.7004	novel.5409
TRINITY_DN1064_c0_g1_i2.path1	Pepsico2_Contig14558.path1	TRINITY_DN1201_c2_g1_i2.path1	TRINITY_DN1105_c0_g1_i2.path1
Pepsico2_Contig6456.path1	novel.2550	Pepsico2_Contig9970.path1	TRINITY_DN3634_c0_g1_i4.path1
Pepsico1_Contig346.path1	Pepsico2_Contig3304.path1	novel.1553	TRINITY_DN24307_c0_g1_i1.path1
novel.9427	TRINITY_DN112522_c0_g1_i1.path1	Pepsico2_Contig14213.path1	Pepsico2_Contig10729.path1
Pepsico1_Contig26918.path1	Pepsico1_Contig1029.path1	TRINITY_DN21572_c0_g1_i1.path1	TRINITY_DN3394_c1_g1_i3.path1
Pepsico1_Contig2066.path2	Pepsico1_Contig3093.path2	TRINITY_DN10241_c1_g3_i1.path1	novel.4924
Pepsico2_Contig7718.path1	Pepsico2_Contig4586.path1	novel.5801	Pepsico2_Contig14131.path2
TRINITY_DN2414_c1_g1_i3.path1	Pepsico2_Contig17288.path1	TRINITY_DN236_c0_g1_i2.path1	Pepsico2_Contig6534.path2
novel.1229	Pepsico2_Contig11248.path1	Pepsico2_Contig17794.path1	TRINITY_DN14061_c0_g3_i2.path1
TRINITY_DN32609_c0_g1_i2.path1	novel.2457	Pepsico2_Contig20048.path1	novel.2193
TRINITY_DN24292_c0_g1_i4.path1	TRINITY_DN13826_c0_g1_i3.path1	Pepsico2_Contig19157.path1	Pepsico2_Contig12412.path1
TRINITY_DN33468_c0_g1_i2.path2	Pepsico2_Contig768.path1	TRINITY_DN25384_c0_g2_i1.path3	Pepsico2_Contig7984.path2
Pepsico2_Contig8908.path1	TRINITY_DN53024_c0_g1_i1.path2	novel.5451	Pepsico2_Contig550.path1
Pepsico2_Contig17056.path1	TRINITY_DN3582_c0_g1_i2.path2	TRINITY_DN7068_c0_g1_i5.path1	novel.6254
TRINITY_DN78750_c0_g1_i1.path1	novel.9447	Pepsico2_Contig15237.path1	novel.2676
TRINITY_DN1105_c0_g1_i2.path1	novel.6581	Pepsico1_Contig2552.path1	novel.4354
TRINITY_DN5904_c0_g1_i3.path1	Pepsico2_Contig5904.path1	Pepsico2_Contig14022.path1	novel.8805
Pepsico2_Contig17305.path4	novel.4346	TRINITY_DN2098_c0_g2_i1.path1	TRINITY_DN16045_c1_g1_i4.path1
TRINITY_DN46537_c0_g1_i2.path1	TRINITY_DN108916_c0_g1_i1.path1	novel.8498	TRINITY_DN13657_c0_g1_i2.path1
TRINITY_DN25384_c0_g2_i1.path3	Pepsico1_Contig346.path1	Pepsico2_Contig3722.path1	TRINITY_DN100308_c0_g1_i1.path1
TRINITY_DN22219_c0_g1_i1.path2	Pepsico2_Contig4567.path1	novel.3628	novel.9968
TRINITY_DN4812_c0_g2_i2.path1	TRINITY_DN15073_c0_g1_i2.path1	novel.1229	Pepsico1_Contig7353.path1
novel.7791	novel.1229	Pepsico1_Contig743.path1	TRINITY_DN1928_c0_g1_i7.path2
TRINITY_DN556_c0_g1_i1.path3	Pepsico2_Contig18112.path1	TRINITY_DN10709_c0_g1_i3.path2	Pepsico1_Contig2381.path1
Pepsico2_Contig1309.path1	novel.1560	novel.1880	TRINITY_DN13217_c1_g1_i1.path1
TRINITY_DN29565_c0_g1_i3.path3	novel.4846	Pepsico1_Contig224.path1	novel.8487
TRINITY_DN21081_c0_g1_i1.path1	novel.639	novel.4354	TRINITY_DN13858_c0_g1_i1.path1
TRINITY_DN90920_c0_g1_i1.path1	TRINITY_DN7501_c0_g2_i1.path1	Pepsico2_Contig18112.path1	Pepsico1_Contig8040.path2
novel.769	novel.4317	TRINITY_DN9136_c1_g3_i1.path1	novel.5614
Pepsico2_Contig17090.path1	TRINITY_DN8283_c0_g1_i1.path1	TRINITY_DN4714_c0_g1_i9.path1	TRINITY_DN10471_c0_g2_i1.path1
Pepsico2_Contig17404.path1	Pepsico1_Contig3021.path1	novel.4929	Pepsico2_Contig651.path2
TRINITY_DN21343_c0_g1_i4.path1	Pepsico2_Contig3476.path1	Pepsico1_Contig195.path1	TRINITY_DN32286_c0_g2_i1.path1
novel.380	Pepsico2_Contig5308.path1	novel.7949	Pepsico2_Contig19795.path2
TRINITY_DN7122_c0_g1_i3.path1	Pepsico2_Contig3536.path1	TRINITY_DN9696_c0_g1_i1.path1	TRINITY_DN8849_c1_g1_i7.path1
novel.8037	Pepsico2_Contig18011.path1	TRINITY_DN16936_c0_g1_i1.path1	Pepsico2_Contig17305.path4
Pepsico2_Contig10529.path2	TRINITY_DN22584_c0_g3_i1.path1	TRINITY_DN10286_c0_g1_i2.path1	Pepsico2_Contig7520.path1
novel.1863	TRINITY_DN8392_c0_g1_i2.path1	Pepsico2_Contig7520.path1	TRINITY_DN4_c0_g1_i6.path2
novel.1513	TRINITY_DN8602_c0_g1_i4.path1	novel.10337	novel.1417
TRINITY_DN12163_c0_g1_i4.path1	novel.2402	TRINITY_DN37338_c0_g1_i3.path1	Pepsico2_Contig18257.path1
TRINITY_DN25287_c0_g3_i1.path1	novel.7885	novel.6254	Pepsico1_Contig1320.path1
TRINITY_DN28452_c0_g1_i8.path1	Pepsico2_Contig6161.path1	novel.8058	TRINITY_DN23908_c0_g1_i2.path1
TRINITY_DN23092_c2_g1_i1.path1	TRINITY_DN1580_c0_g1_i4.path2	TRINITY_DN45181_c0_g1_i2.path1	TRINITY_DN12929_c0_g1_i1.path2
Pepsico2_Contig15288.path1	Pepsico2_Contig7984.path2	Pepsico2_Contig10033.path1	TRINITY_DN17812_c0_g1_i4.path1
Pepsico2_Contig17712.path1	TRINITY_DN3567_c0_g2_i2.path1	TRINITY_DN26096_c0_g1_i4.path1	TRINITY_DN3567_c0_g2_i2.path1
TRINITY_DN32286_c0_g2_i1.path1	novel.5230	TRINITY_DN4_c0_g1_i6.path2	TRINITY_DN49146_c0_g1_i1.path2
TRINITY_DN11163_c1_g2_i1.path1	novel.2575	Pepsico2_Contig6463.path1	TRINITY_DN6009_c0_g1_i6.path1
Pepsico1_Contig5249.path1	TRINITY_DN22012_c1_g1_i1.path1	TRINITY_DN61132_c0_g1_i1.path1	Pepsico2_Contig3085.path1
Pepsico2_Contig13865.path1	TRINITY_DN34253_c0_g1_i1.path1	TRINITY_DN12952_c0_g5_i1.path2	novel.8079
TRINITY_DN754_c0_g1_i2.path1	novel.5209	Pepsico2_Contig4586.path1	TRINITY_DN34205_c0_g1_i1.path3
Pepsico1_Contig38.path2	Pepsico2_Contig4899.path1	novel.2676	novel.4360
novel.7165	TRINITY_DN24907_c0_g1_i4.path1	TRINITY_DN9659_c0_g2_i1.path1	TRINITY_DN4604_c0_g2_i1.path1
TRINITY_DN32603_c0_g1_i1.path1	novel.1627	TRINITY_DN4139_c0_g2_i1.path1	TRINITY_DN45181_c0_g1_i2.path1
novel.329	Pepsico1_Contig5319.path1	novel.5230	TRINITY_DN8602_c0_g1_i4.path1
TRINITY_DN15087_c1_g1_i1.path1	Pepsico2_Contig11300.path1	TRINITY_DN19759_c0_g1_i2.path1	TRINITY_DN41786_c0_g1_i3.path1
novel.4061	novel.9846	TRINITY_DN19166_c0_g1_i6.path1	TRINITY_DN2833_c0_g2_i1.path1
TRINITY_DN22425_c0_g1_i1.path1	novel.4381	TRINITY_DN55287_c0_g1_i1.path3	TRINITY_DN59954_c0_g1_i3.path1
Pepsico1_Contig4901.path1	novel.6785	TRINITY_DN1580_c0_g1_i4.path2	TRINITY_DN1387_c0_g1_i2.path1
TRINITY_DN55806_c0_g1_i1.path2	novel.7076	novel.2160	novel.5258
TRINITY_DN36021_c0_g1_i1.path1	Pepsico1_Contig1433.path1	TRINITY_DN9701_c0_g1_i1.path1	TRINITY_DN4606_c0_g2_i1.path1
novel.3826	Pepsico2_Contig19350.path1	novel.6949	Pepsico1_Contig37830.path1
TRINITY_DN2354_c0_g1_i4.path2	TRINITY_DN10709_c0_g1_i3.path1	Pepsico2_Contig11259.path1	TRINITY_DN20837_c0_g1_i1.path3
TRINITY_DN59954_c0_g1_i3.path1	Pepsico2_Contig4432.path1	TRINITY_DN3393_c0_g1_i2.path1	TRINITY_DN4498_c0_g1_i10.path1
TRINITY_DN2053_c0_g1_i15.path1	TRINITY_DN5767_c0_g1_i5.path1	Pepsico2_Contig19795.path2	Pepsico1_Contig7932.path1
TRINITY_DN2010_c0_g1_i1.path1	TRINITY_DN10782_c0_g1_i1.path1	novel.2074	TRINITY_DN12642_c0_g1_i9.path1
TRINITY_DN2185_c0_g1_i8.path1	Pepsico2_Contig20023.path1	Pepsico2_Contig660.path1	TRINITY_DN881_c0_g1_i4.path1
TRINITY_DN31232_c0_g2_i1.path1	TRINITY_DN21253_c0_g4_i1.path1	novel.5700	TRINITY_DN44824_c0_g1_i1.path4
TRINITY_DN842_c0_g1_i1.path1	TRINITY_DN15198_c0_g3_i1.path1	novel.3129	novel.7029
TRINITY_DN138_c0_g1_i1.path1	TRINITY_DN24307_c0_g1_i1.path1	TRINITY_DN13323_c0_g2_i1.path1	TRINITY_DN3543_c0_g3_i1.path1
TRINITY_DN27443_c0_g1_i1.path1	TRINITY_DN106898_c0_g1_i1.path1	TRINITY_DN19139_c0_g1_i1.path1	TRINITY_DN33313_c0_g2_i2.path1
TRINITY_DN19340_c0_g1_i5.path2	Pepsico2_Contig19649.path2	TRINITY_DN652_c0_g1_i1.path1	Pepsico1_Contig244.path1
TRINITY_DN36731_c0_g1_i1.path2	novel.729	novel.3399	TRINITY_DN3489_c0_g1_i2.path1
TRINITY_DN17175_c0_g1_i4.path2	TRINITY_DN4172_c0_g1_i16.path1	TRINITY_DN14533_c0_g1_i4.path1	Pepsico1_Contig37308.path1
TRINITY_DN23079_c0_g1_i1.path1	novel.5549	novel.8487	TRINITY_DN14167_c0_g1_i1.path1
Pepsico2_Contig12290.path1	Pepsico2_Contig3085.path1	novel.1098	TRINITY_DN6047_c1_g1_i1.path1
TRINITY_DN17578_c0_g1_i2.path1	novel.6260	TRINITY_DN78422_c0_g1_i2.path1	novel.8359
novel.3663	TRINITY_DN39335_c0_g1_i1.path1	TRINITY_DN2455_c1_g1_i5.path1	novel.8498
TRINITY_DN3493_c0_g1_i3.path1	Pepsico1_Contig5243.path1	novel.1781	TRINITY_DN17463_c0_g1_i3.path3
Pepsico2_Contig14315.path1	TRINITY_DN16509_c1_g1_i2.path1	TRINITY_DN14167_c0_g1_i1.path1	TRINITY_DN10471_c0_g2_i1.path2
novel.2807	novel.6658	novel.7636	TRINITY_DN35046_c0_g2_i1.path1
TRINITY_DN37868_c0_g1_i1.path1	TRINITY_DN16495_c0_g1_i1.path2	novel.2822	novel.5925
Pepsico2_Contig1781.path1	TRINITY_DN5857_c0_g1_i1.path1	novel.7357	TRINITY_DN7691_c0_g4_i1.path1
TRINITY_DN2960_c0_g1_i1.path1	TRINITY_DN19139_c0_g1_i1.path1	TRINITY_DN13858_c0_g1_i1.path1	TRINITY_DN10752_c0_g1_i1.path2
novel.6006	Pepsico2_Contig7316.path1	TRINITY_DN14061_c0_g3_i2.path1	TRINITY_DN10738_c0_g2_i1.path2
TRINITY_DN107608_c0_g1_i1.path1	TRINITY_DN22959_c0_g1_i1.path2	TRINITY_DN19177_c0_g1_i1.path1	TRINITY_DN112522_c0_g1_i1.path1
Pepsico1_Contig2504.path1	TRINITY_DN16176_c0_g1_i3.path1	Pepsico1_Contig24518.path1	novel.5145
novel.4458	TRINITY_DN23943_c0_g5_i1.path1	TRINITY_DN9890_c0_g1_i6.path1	novel.6949
novel.4974	TRINITY_DN249_c1_g1_i1.path1	Pepsico1_Contig4010.path1	TRINITY_DN70178_c0_g1_i1.path1
Pepsico2_Contig4918.path1	TRINITY_DN35_c0_g2_i1.path1	novel.258	Pepsico2_Contig17052.path1
TRINITY_DN25384_c0_g2_i1.path1	Pepsico2_Contig2890.path1	Pepsico1_Contig701.path2	TRINITY_DN38078_c0_g1_i1.path1
TRINITY_DN15916_c0_g1_i1.path1	Pepsico2_Contig17404.path1	TRINITY_DN10471_c0_g2_i1.path1	TRINITY_DN28245_c0_g2_i1.path2
novel.3530	novel.2556	TRINITY_DN14002_c2_g1_i1.path1	Pepsico2_Contig19917.path4
TRINITY_DN308_c0_g1_i1.path1	TRINITY_DN23079_c0_g1_i1.path1	TRINITY_DN16373_c0_g1_i1.path1	TRINITY_DN23948_c0_g2_i1.path1
Pepsico2_Contig17956.path1	novel.3530	Pepsico2_Contig19649.path2	novel.1781
TRINITY_DN99439_c0_g1_i1.path1	Pepsico2_Contig14533.path1	Pepsico2_Contig3476.path1	TRINITY_DN15272_c0_g3_i1.path1
novel.8593	TRINITY_DN1019_c0_g2_i1.path1	TRINITY_DN15198_c0_g3_i1.path1	Pepsico1_Contig2462.path1
Pepsico2_Contig2406.path1	novel.2822	Pepsico2_Contig3536.path1	Pepsico1_Contig1046.path1
Pepsico2_Contig18037.path1	Pepsico1_Contig2556.path1	TRINITY_DN3870_c0_g1_i1.path1	TRINITY_DN71191_c0_g1_i1.path1
TRINITY_DN34589_c0_g1_i1.path1	Pepsico1_Contig1934.path2	TRINITY_DN9693_c0_g1_i7.path1	TRINITY_DN22959_c0_g1_i1.path2
novel.4372	TRINITY_DN22741_c0_g2_i2.path1	TRINITY_DN50781_c0_g1_i1.path1	TRINITY_DN21916_c0_g1_i1.path1
novel.3043	Pepsico2_Contig16776.path1	TRINITY_DN53024_c0_g1_i1.path2	Pepsico2_Contig9507.path1
TRINITY_DN21860_c1_g1_i1.path1	TRINITY_DN78750_c0_g1_i1.path1	TRINITY_DN43155_c0_g1_i1.path1	Pepsico2_Contig18089.path1
novel.2360	Pepsico2_Contig18182.path1	Pepsico2_Contig1180.path1	Pepsico1_Contig1025.path1
TRINITY_DN27809_c0_g1_i1.path1	TRINITY_DN22103_c0_g1_i1.path1	novel.8805	TRINITY_DN17793_c0_g3_i2.path2
TRINITY_DN13274_c0_g1_i1.path1	TRINITY_DN13622_c0_g3_i1.path1	TRINITY_DN21428_c0_g1_i3.path1	TRINITY_DN4887_c0_g1_i6.path1
TRINITY_DN82040_c0_g1_i1.path1	Pepsico2_Contig135.path1	novel.5863	Pepsico2_Contig21049.path1
TRINITY_DN17766_c0_g1_i1.path1	TRINITY_DN19834_c0_g1_i3.path2	Pepsico1_Contig28290.path1	Pepsico1_Contig2258.path1
TRINITY_DN3543_c0_g3_i1.path1	novel.8153	novel.6394	TRINITY_DN15251_c0_g1_i1.path1
Pepsico1_Contig4345.path1	TRINITY_DN48507_c0_g1_i1.path1	TRINITY_DN7691_c0_g2_i1.path1	Pepsico2_Contig20778.path1
TRINITY_DN1019_c0_g2_i1.path1	TRINITY_DN14475_c0_g2_i3.path1	TRINITY_DN7005_c0_g1_i4.path1	novel.6264
TRINITY_DN2871_c0_g1_i2.path1	Pepsico1_Contig7716.path1	TRINITY_DN82762_c0_g1_i1.path1	TRINITY_DN751_c0_g1_i3.path1
TRINITY_DN39623_c0_g1_i1.path1	TRINITY_DN43500_c0_g1_i1.path1	Pepsico1_Contig2381.path1	Pepsico2_Contig17794.path1
novel.9227	Pepsico2_Contig6528.path1	Pepsico1_Contig636.path1	TRINITY_DN9712_c0_g3_i2.path1
Pepsico2_Contig19917.path4	Pepsico2_Contig15237.path1	TRINITY_DN1945_c0_g1_i3.path1	novel.8833
TRINITY_DN22103_c0_g1_i1.path1	TRINITY_DN26611_c0_g2_i1.path1	Pepsico1_Contig916.path1	TRINITY_DN90920_c0_g1_i1.path1
Pepsico2_Contig16783.path1	Pepsico2_Contig17047.path1	TRINITY_DN22077_c0_g1_i12.path2	TRINITY_DN7068_c0_g1_i5.path1
TRINITY_DN12952_c0_g4_i1.path1	TRINITY_DN14443_c0_g2_i4.path1	Pepsico1_Contig3224.path1	TRINITY_DN2753_c0_g1_i1.path1
novel.6855	TRINITY_DN18638_c0_g3_i1.path1	novel.7111	novel.5478
TRINITY_DN40354_c0_g1_i2.path1	Pepsico2_Contig17305.path4	TRINITY_DN100308_c0_g1_i1.path1	novel.1553
TRINITY_DN32587_c0_g1_i1.path1	novel.5126	TRINITY_DN13432_c0_g1_i1.path1	TRINITY_DN23438_c0_g1_i5.path1
TRINITY_DN11330_c1_g1_i1.path2	novel.9339	TRINITY_DN6009_c0_g1_i6.path1	TRINITY_DN12548_c0_g1_i3.path2
Pepsico2_Contig6528.path1	TRINITY_DN14061_c0_g2_i1.path2	TRINITY_DN19306_c0_g1_i4.path1	TRINITY_DN7125_c0_g1_i8.path1
TRINITY_DN2960_c0_g2_i1.path1	Pepsico1_Contig22407.path1	TRINITY_DN23642_c0_g1_i4.path1	Pepsico1_Contig771.path1
Pepsico1_Contig5974.path1	TRINITY_DN17463_c0_g1_i3.path3	novel.5925	TRINITY_DN14827_c0_g1_i1.path1
Pepsico2_Contig8440.path1	Pepsico2_Contig17681.path1	TRINITY_DN14775_c0_g1_i8.path1	TRINITY_DN27443_c0_g1_i1.path1
TRINITY_DN36019_c1_g1_i1.path1	Pepsico2_Contig19649.path1	Pepsico1_Contig7432.path3	TRINITY_DN9890_c0_g1_i6.path2
TRINITY_DN11951_c0_g1_i1.path1	novel.10016	novel.1616	novel.280
Pepsico2_Contig17438.path1	TRINITY_DN5816_c1_g1_i1.path1	Pepsico2_Contig12692.path5	TRINITY_DN7691_c0_g2_i1.path1
TRINITY_DN50781_c0_g1_i1.path1	TRINITY_DN21428_c0_g1_i3.path1	novel.732	TRINITY_DN5857_c0_g1_i1.path1
novel.660	Pepsico2_Contig7466.path1	TRINITY_DN842_c0_g1_i1.path1	Pepsico2_Contig18037.path1
TRINITY_DN37597_c0_g2_i1.path1	Pepsico2_Contig13724.path2	novel.5310	Pepsico2_Contig17842.path1
TRINITY_DN4901_c0_g2_i1.path1	novel.9333	novel.8506	Pepsico2_Contig19787.path1
Pepsico2_Contig18112.path1	Pepsico2_Contig19245.path1	TRINITY_DN7178_c0_g2_i1.path1	Pepsico2_Contig19649.path1
TRINITY_DN4502_c2_g1_i1.path1	TRINITY_DN9701_c0_g1_i1.path1	novel.4360	TRINITY_DN18491_c0_g1_i3.path1
novel.4450	Pepsico2_Contig18178.path1	TRINITY_DN15718_c0_g1_i3.path1	TRINITY_DN14443_c0_g2_i4.path1
Pepsico1_Contig24518.path1	Pepsico2_Contig16947.path1	TRINITY_DN15455_c0_g1_i7.path3	Pepsico1_Contig3658.path1
TRINITY_DN31771_c0_g3_i1.path1	Pepsico2_Contig7372.path1	TRINITY_DN4172_c0_g1_i16.path1	TRINITY_DN27219_c0_g1_i7.path1
Pepsico2_Contig12502.path1	novel.4631	TRINITY_DN35164_c0_g1_i1.path1	Pepsico1_Contig5029.path1
novel.1477	TRINITY_DN32286_c0_g2_i1.path1	TRINITY_DN881_c0_g1_i4.path1	TRINITY_DN48507_c0_g1_i1.path2
TRINITY_DN24554_c0_g1_i1.path2	TRINITY_DN110160_c0_g1_i1.path1	TRINITY_DN71191_c0_g1_i1.path1	TRINITY_DN23642_c0_g1_i4.path1
Pepsico2_Contig1790.path2	TRINITY_DN9204_c0_g2_i4.path1	novel.193	TRINITY_DN14594_c0_g1_i1.path2
TRINITY_DN10035_c0_g1_i1.path1	Pepsico2_Contig791.path1	TRINITY_DN52891_c0_g1_i1.path1	TRINITY_DN8956_c0_g2_i2.path1
Pepsico2_Contig8136.path1	TRINITY_DN17397_c0_g1_i2.path1	Pepsico2_Contig11065.path1	TRINITY_DN23079_c0_g1_i1.path1
novel.5350	TRINITY_DN13217_c1_g1_i1.path1	novel.7885	Pepsico2_Contig14182.path1
novel.5747	Pepsico2_Contig4435.path1	TRINITY_DN18616_c0_g1_i4.path1	TRINITY_DN12040_c0_g1_i15.path2
TRINITY_DN8375_c1_g1_i2.path1	TRINITY_DN21318_c0_g1_i1.path1	novel.7044	TRINITY_DN15718_c0_g1_i3.path1
TRINITY_DN79144_c0_g1_i1.path1	TRINITY_DN19468_c0_g2_i2.path1	TRINITY_DN14594_c0_g1_i1.path3	TRINITY_DN4_c0_g1_i6.path1
Pepsico1_Contig2960.path1	TRINITY_DN15149_c0_g1_i1.path1	novel.4924	novel.1175
Pepsico1_Contig4198.path2	Pepsico2_Contig19917.path4	novel.8079	TRINITY_DN13998_c0_g2_i1.path1
TRINITY_DN13270_c0_g1_i2.path1	Pepsico1_Contig2677.path1	TRINITY_DN15272_c0_g3_i1.path1	TRINITY_DN842_c0_g1_i1.path1
TRINITY_DN10962_c1_g1_i1.path1	novel.732	TRINITY_DN10097_c0_g1_i2.path1	TRINITY_DN12952_c0_g5_i1.path2
TRINITY_DN11005_c1_g1_i2.path1	TRINITY_DN4289_c0_g2_i1.path2	TRINITY_DN12280_c0_g2_i1.path1	TRINITY_DN16825_c0_g1_i7.path1
Pepsico2_Contig19129.path1	TRINITY_DN34195_c0_g1_i2.path2	Pepsico2_Contig17288.path1	TRINITY_DN28930_c0_g2_i2.path1
TRINITY_DN19392_c0_g2_i1.path1	TRINITY_DN5482_c0_g1_i1.path2	Pepsico2_Contig4893.path1	novel.8149
TRINITY_DN373_c0_g2_i8.path1	TRINITY_DN48202_c0_g1_i2.path1	novel.2442	TRINITY_DN20837_c0_g1_i1.path2
TRINITY_DN23943_c0_g5_i1.path1	Pepsico2_Contig1744.path1	TRINITY_DN2492_c0_g1_i1.path1	TRINITY_DN22012_c1_g1_i1.path1
TRINITY_DN78470_c0_g1_i1.path1	novel.7357	TRINITY_DN3070_c1_g1_i2.path1	Pepsico2_Contig6161.path1
TRINITY_DN13830_c1_g1_i1.path1	novel.5900	Pepsico2_Contig7727.path1	novel.9649
novel.2640	novel.5611	TRINITY_DN21253_c0_g4_i1.path1	novel.4031
novel.6971	TRINITY_DN2385_c0_g1_i1.path2	TRINITY_DN38078_c0_g1_i1.path1	TRINITY_DN32381_c0_g1_i1.path1
Pepsico2_Contig16895.path1	Pepsico2_Contig18269.path1	TRINITY_DN5321_c0_g1_i10.path1	TRINITY_DN1201_c2_g1_i2.path1
TRINITY_DN44202_c0_g1_i1.path1	TRINITY_DN27443_c0_g1_i1.path1	TRINITY_DN751_c0_g1_i3.path1	Pepsico2_Contig18011.path1
novel.9649	novel.8498	TRINITY_DN13963_c0_g1_i1.path1	TRINITY_DN28145_c0_g3_i2.path1
TRINITY_DN6841_c0_g1_i2.path1	Pepsico2_Contig20286.path1	TRINITY_DN87711_c0_g1_i1.path1	novel.4929
TRINITY_DN42170_c0_g1_i1.path1	Pepsico2_Contig12625.path1	TRINITY_DN110160_c0_g1_i1.path1	novel.193
TRINITY_DN5621_c0_g3_i1.path1	TRINITY_DN3180_c0_g2_i1.path1	Pepsico2_Contig4567.path1	novel.7508
TRINITY_DN88385_c0_g1_i1.path1	TRINITY_DN2455_c1_g1_i5.path1	TRINITY_DN22959_c0_g1_i1.path2	novel.3119
Pepsico2_Contig19874.path1	TRINITY_DN37597_c0_g2_i1.path1	TRINITY_DN4532_c0_g1_i4.path2	TRINITY_DN277_c2_g1_i1.path3
novel.4401	novel.2802	TRINITY_DN40530_c0_g1_i1.path2	novel.7044
TRINITY_DN17502_c0_g1_i2.path1	novel.5801	Pepsico2_Contig20465.path1	TRINITY_DN89139_c0_g1_i1.path1
Pepsico2_Contig12060.path1	TRINITY_DN78855_c0_g1_i1.path1	novel.5126	novel.7357
Pepsico1_Contig1783.path1	TRINITY_DN7772_c0_g1_i4.path1	TRINITY_DN43075_c0_g1_i2.path3	TRINITY_DN11525_c0_g1_i21.path1
Pepsico1_Contig22407.path1	Pepsico2_Contig20342.path1	novel.5209	TRINITY_DN38451_c0_g1_i8.path1
Pepsico2_Contig8591.path1	TRINITY_DN5351_c0_g2_i1.path1	novel.5478	TRINITY_DN55013_c0_g1_i1.path2
TRINITY_DN4139_c0_g2_i1.path1	TRINITY_DN25572_c0_g1_i1.path1	Pepsico2_Contig18089.path1	TRINITY_DN11478_c0_g1_i4.path1
TRINITY_DN5604_c0_g1_i2.path1	TRINITY_DN5199_c0_g2_i1.path2	novel.8294	Pepsico2_Contig6611.path2
TRINITY_DN13432_c0_g1_i1.path1	Pepsico2_Contig7514.path1	novel.8499	TRINITY_DN7691_c0_g1_i1.path2
TRINITY_DN19058_c0_g1_i1.path1	Pepsico1_Contig910.path1	novel.7477	novel.7885
novel.4846	TRINITY_DN8849_c1_g1_i7.path1	novel.9974	novel.3680
Pepsico2_Contig18850.path1	novel.9457	Pepsico2_Contig2406.path1	novel.6846
Pepsico1_Contig1064.path2	Pepsico1_Contig1524.path2	TRINITY_DN11478_c0_g1_i4.path1	novel.8499
TRINITY_DN6907_c0_g1_i2.path1	novel.9649	Pepsico2_Contig18257.path1	TRINITY_DN6633_c0_g1_i5.path1
TRINITY_DN8622_c0_g1_i2.path1	Pepsico2_Contig8286.path1	Pepsico2_Contig9786.path1	TRINITY_DN10301_c1_g1_i3.path1
Pepsico2_Contig17839.path1	TRINITY_DN12548_c0_g1_i3.path2	novel.1107	Pepsico2_Contig4456.path2
TRINITY_DN4614_c0_g1_i3.path1	TRINITY_DN21493_c0_g1_i1.path1	Pepsico2_Contig8879.path1	novel.5461
novel.8625	TRINITY_DN55287_c0_g1_i1.path4	TRINITY_DN17793_c0_g3_i2.path2	TRINITY_DN32319_c0_g1_i1.path1
novel.5407	TRINITY_DN7469_c0_g1_i1.path1	TRINITY_DN20837_c0_g1_i1.path3	Pepsico2_Contig13844.path1
Pepsico2_Contig15057.path1	TRINITY_DN23079_c0_g1_i1.path2	TRINITY_DN106297_c0_g1_i1.path1	TRINITY_DN19177_c0_g1_i1.path1
TRINITY_DN16337_c0_g3_i1.path1	novel.4299	Pepsico2_Contig6288.path1	novel.1495
Pepsico1_Contig1880.path1	Pepsico1_Contig1934.path1	TRINITY_DN14443_c0_g2_i4.path1	TRINITY_DN7178_c0_g2_i1.path1
TRINITY_DN29271_c0_g1_i2.path3	TRINITY_DN3027_c0_g1_i4.path1	novel.5409	novel.1820
TRINITY_DN5816_c0_g1_i8.path1	novel.3521	TRINITY_DN71899_c0_g1_i2.path1	TRINITY_DN7005_c0_g1_i4.path1
TRINITY_DN72_c1_g1_i2.path1	TRINITY_DN10097_c0_g1_i2.path1	Pepsico2_Contig19917.path4	Pepsico2_Contig12308.path2
TRINITY_DN102914_c0_g1_i1.path1	Pepsico1_Contig4678.path1	Pepsico2_Contig17681.path1	TRINITY_DN5938_c0_g3_i1.path1
Pepsico2_Contig1861.path1	TRINITY_DN100308_c0_g1_i1.path1	novel.8833	Pepsico2_Contig19106.path1
TRINITY_DN29865_c0_g1_i1.path1	TRINITY_DN29073_c0_g1_i3.path2	TRINITY_DN18491_c0_g1_i3.path1	TRINITY_DN15073_c0_g1_i2.path1
TRINITY_DN35752_c0_g1_i2.path1	Pepsico1_Contig1880.path1	novel.3398	TRINITY_DN10471_c0_g3_i1.path1
TRINITY_DN87900_c0_g1_i1.path1	Pepsico1_Contig7054.path1	Pepsico2_Contig2406.path2	TRINITY_DN249_c1_g1_i1.path1
TRINITY_DN78521_c0_g1_i1.path1	TRINITY_DN1945_c0_g1_i3.path1	novel.9825	novel.4346
novel.2340	novel.2134	TRINITY_DN55013_c0_g1_i1.path2	Pepsico1_Contig865.path1
TRINITY_DN452_c0_g1_i2.path1	Pepsico2_Contig15057.path1	TRINITY_DN249_c1_g1_i1.path1	TRINITY_DN22741_c0_g2_i2.path1
Pepsico2_Contig9173.path1	novel.9609	TRINITY_DN35752_c0_g1_i2.path1	Pepsico2_Contig5727.path3
Pepsico2_Contig19604.path1	TRINITY_DN11548_c0_g1_i5.path1	TRINITY_DN10242_c0_g1_i5.path2	TRINITY_DN14594_c0_g1_i1.path3
TRINITY_DN100588_c0_g1_i1.path1	Pepsico1_Contig1034.path1	Pepsico2_Contig6161.path1	novel.1098
novel.8191	TRINITY_DN24567_c0_g2_i1.path1	Pepsico2_Contig12784.path1	Pepsico2_Contig15659.path1
Pepsico2_Contig9276.path1	Pepsico1_Contig2134.path1	novel.4317	Pepsico1_Contig28290.path1
Pepsico2_Contig17284.path1	Pepsico2_Contig2300.path1	Pepsico2_Contig4456.path2	Pepsico2_Contig1744.path2
novel.10371	TRINITY_DN13584_c0_g2_i1.path1	TRINITY_DN6633_c0_g1_i5.path1	Pepsico2_Contig4411.path1
TRINITY_DN15616_c0_g1_i5.path3	TRINITY_DN9899_c0_g1_i1.path1	TRINITY_DN36478_c0_g1_i3.path1	novel.2226
TRINITY_DN3739_c0_g1_i2.path1	Pepsico2_Contig14315.path1	TRINITY_DN5857_c0_g1_i1.path1	Pepsico2_Contig11300.path1
TRINITY_DN2854_c0_g1_i1.path1	Pepsico2_Contig12060.path1	TRINITY_DN15215_c0_g2_i1.path1	TRINITY_DN931_c0_g2_i2.path1
TRINITY_DN21493_c0_g1_i1.path1	TRINITY_DN7915_c0_g2_i2.path1	TRINITY_DN61085_c0_g1_i1.path1	Pepsico2_Contig17718.path1
TRINITY_DN79556_c0_g1_i1.path1	TRINITY_DN16303_c0_g1_i4.path1	TRINITY_DN41786_c0_g1_i3.path1	Pepsico2_Contig638.path2
Pepsico2_Contig7466.path1	novel.399	TRINITY_DN4289_c0_g2_i1.path2	TRINITY_DN19392_c0_g2_i1.path1
novel.2742	novel.10371	novel.6786	TRINITY_DN43075_c0_g1_i2.path2
Pepsico1_Contig5319.path1	TRINITY_DN11593_c1_g1_i7.path2	TRINITY_DN6662_c0_g1_i6.path1	novel.1064
TRINITY_DN9712_c0_g2_i1.path1	novel.2353	TRINITY_DN23908_c0_g1_i2.path1	TRINITY_DN15455_c0_g1_i7.path3
TRINITY_DN877_c0_g1_i2.path1	TRINITY_DN29865_c0_g1_i1.path2	Pepsico2_Contig1721.path1	TRINITY_DN648_c1_g1_i8.path2
TRINITY_DN37147_c1_g1_i1.path1	TRINITY_DN19834_c0_g1_i3.path1	TRINITY_DN751_c0_g1_i3.path2	TRINITY_DN310_c1_g1_i3.path1
TRINITY_DN2492_c0_g1_i1.path1	TRINITY_DN9952_c0_g3_i1.path1	TRINITY_DN506_c0_g1_i4.path1	Pepsico2_Contig3659.path1
novel.9616	TRINITY_DN7122_c0_g1_i3.path1	TRINITY_DN19092_c0_g2_i1.path1	TRINITY_DN16421_c0_g1_i9.path3
Pepsico1_Contig1678.path1	Pepsico2_Contig6237.path2	TRINITY_DN10166_c0_g1_i1.path1	TRINITY_DN30636_c0_g1_i3.path1
novel.2798	TRINITY_DN11373_c1_g1_i12.path2	TRINITY_DN15239_c0_g1_i10.path1	TRINITY_DN5174_c1_g1_i2.path1
novel.6977	TRINITY_DN24212_c0_g1_i1.path1	TRINITY_DN44824_c0_g1_i1.path4	TRINITY_DN24759_c0_g1_i3.path1
novel.7371	TRINITY_DN23468_c0_g1_i2.path2	Pepsico1_Contig2324.path1	TRINITY_DN52537_c0_g1_i1.path1
Pepsico2_Contig5650.path1	novel.769	TRINITY_DN8648_c0_g1_i4.path2	Pepsico2_Contig7511.path1
TRINITY_DN14061_c0_g2_i1.path2	Pepsico2_Contig1744.path2	novel.4760	novel.7286
TRINITY_DN10295_c0_g2_i1.path1	TRINITY_DN6390_c0_g1_i3.path1	TRINITY_DN27219_c0_g1_i7.path1	novel.8235
TRINITY_DN15251_c0_g1_i1.path2	novel.7111	Pepsico2_Contig9556.path1	Pepsico1_Contig701.path2
Pepsico2_Contig16099.path1	TRINITY_DN26200_c0_g1_i1.path1	TRINITY_DN16279_c0_g1_i1.path3	TRINITY_DN20133_c0_g1_i3.path1
TRINITY_DN5591_c0_g1_i3.path2	TRINITY_DN7005_c0_g1_i4.path1	Pepsico2_Contig11300.path1	TRINITY_DN582_c2_g1_i6.path1
novel.9457	TRINITY_DN1387_c0_g1_i2.path1	novel.280	TRINITY_DN14061_c0_g2_i1.path2
TRINITY_DN20966_c0_g5_i1.path1	TRINITY_DN23493_c0_g1_i1.path1	Pepsico1_Contig7054.path1	TRINITY_DN21572_c0_g1_i1.path1
TRINITY_DN21691_c0_g1_i2.path1	novel.9373	TRINITY_DN7472_c0_g1_i1.path1	novel.7021
TRINITY_DN44824_c0_g1_i1.path4	TRINITY_DN102507_c0_g1_i1.path1	TRINITY_DN11785_c1_g1_i1.path1	TRINITY_DN9136_c1_g3_i1.path1
Pepsico2_Contig17288.path1	TRINITY_DN61247_c0_g1_i1.path1	TRINITY_DN7521_c0_g1_i1.path1	novel.2816
Pepsico2_Contig19497.path1	TRINITY_DN14533_c0_g1_i4.path1	TRINITY_DN9712_c0_g3_i2.path1	novel.2760
TRINITY_DN18199_c0_g1_i1.path2	TRINITY_DN15597_c0_g1_i6.path1	TRINITY_DN10547_c0_g1_i17.path1	TRINITY_DN6979_c0_g1_i6.path1
novel.1616	TRINITY_DN32510_c0_g1_i1.path1	TRINITY_DN70178_c0_g1_i1.path1	TRINITY_DN4027_c0_g5_i1.path1
novel.3782	TRINITY_DN13763_c0_g1_i1.path1	TRINITY_DN4_c0_g1_i6.path1	novel.2819
novel.10460	novel.8181	TRINITY_DN22012_c1_g1_i1.path1	TRINITY_DN71899_c0_g1_i2.path1
Pepsico2_Contig6525.path1	TRINITY_DN32319_c0_g1_i1.path1	TRINITY_DN13657_c0_g1_i2.path1	TRINITY_DN3853_c0_g1_i1.path1
Pepsico1_Contig2094.path1	novel.4602	TRINITY_DN33690_c0_g1_i6.path1	TRINITY_DN12917_c0_g1_i1.path1
TRINITY_DN10166_c0_g1_i1.path1	TRINITY_DN14975_c0_g1_i4.path1	Pepsico1_Contig2444.path1	TRINITY_DN15215_c0_g2_i1.path1
TRINITY_DN17463_c0_g1_i3.path1	TRINITY_DN16767_c0_g1_i2.path1	TRINITY_DN14827_c0_g1_i1.path1	TRINITY_DN5401_c0_g1_i7.path1
TRINITY_DN21916_c0_g1_i1.path1	novel.6946	Pepsico2_Contig19649.path1	TRINITY_DN11687_c0_g1_i1.path1
TRINITY_DN16303_c0_g1_i4.path1	TRINITY_DN12040_c0_g1_i15.path2	TRINITY_DN1766_c0_g2_i2.path1	Pepsico2_Contig3536.path1
Pepsico2_Contig7889.path2	TRINITY_DN5939_c0_g3_i1.path1	TRINITY_DN18815_c0_g2_i2.path1	novel.5863
Pepsico2_Contig19415.path2	TRINITY_DN27643_c0_g1_i3.path2	TRINITY_DN22741_c0_g2_i2.path1	Pepsico2_Contig14627.path1
Pepsico1_Contig18.path2	TRINITY_DN25287_c0_g2_i1.path1	TRINITY_DN12747_c0_g1_i1.path1	TRINITY_DN12952_c0_g4_i1.path1
TRINITY_DN25384_c0_g1_i1.path2	Pepsico2_Contig10688.path1	novel.9846	Pepsico2_Contig19854.path2
TRINITY_DN6999_c0_g2_i1.path1	TRINITY_DN25572_c0_g1_i1.path2	TRINITY_DN7819_c0_g1_i1.path2	Pepsico1_Contig6507.path1
Pepsico2_Contig2406.path2	Pepsico2_Contig6107.path1	Pepsico2_Contig13724.path2	TRINITY_DN22741_c0_g4_i1.path1
Pepsico2_Contig1900.path3	novel.7228	TRINITY_DN22425_c0_g1_i1.path1	Pepsico1_Contig7432.path3
novel.2116	TRINITY_DN881_c0_g1_i4.path1	TRINITY_DN19392_c0_g2_i1.path1	TRINITY_DN4289_c0_g2_i1.path2
TRINITY_DN90864_c0_g1_i1.path1	novel.263	Pepsico2_Contig9173.path1	novel.826
TRINITY_DN15073_c0_g1_i2.path1	TRINITY_DN61085_c0_g1_i1.path1	TRINITY_DN16522_c0_g1_i3.path1	novel.828
TRINITY_DN3106_c1_g1_i1.path1	novel.3826	TRINITY_DN70626_c0_g1_i1.path1	TRINITY_DN61132_c0_g1_i1.path1
novel.5786	novel.6249	novel.1461	Pepsico2_Contig1104.path1
novel.7701	novel.1495	TRINITY_DN37359_c0_g1_i1.path3	TRINITY_DN7521_c0_g1_i1.path1
novel.8005	novel.2098	Pepsico1_Contig2510.path2	TRINITY_DN4879_c0_g2_i1.path1
TRINITY_DN16509_c1_g1_i2.path1	TRINITY_DN11163_c1_g2_i1.path1	Pepsico2_Contig4732.path1	novel.3360
novel.8998	TRINITY_DN8174_c0_g1_i4.path1	TRINITY_DN3180_c0_g2_i1.path1	TRINITY_DN1397_c0_g3_i1.path1
Pepsico1_Contig552.path1	novel.103	novel.1495	TRINITY_DN9120_c1_g1_i2.path1
TRINITY_DN18468_c0_g1_i6.path1	TRINITY_DN32553_c0_g1_i1.path1	Pepsico2_Contig18183.path1	Pepsico2_Contig7727.path1
novel.8488	Pepsico2_Contig17958.path1	TRINITY_DN12464_c0_g1_i1.path1	novel.7636
Pepsico2_Contig14260.path1	novel.6168	TRINITY_DN23079_c0_g1_i1.path1	TRINITY_DN14594_c0_g1_i1.path1
Pepsico2_Contig3637.path1	novel.1633	novel.5856	TRINITY_DN14212_c0_g1_i1.path1
TRINITY_DN55440_c0_g1_i1.path1	Pepsico2_Contig9556.path1	TRINITY_DN16509_c1_g1_i2.path1	novel.5126
TRINITY_DN11593_c1_g1_i7.path1	TRINITY_DN2414_c1_g1_i3.path1	TRINITY_DN59954_c0_g1_i3.path1	TRINITY_DN5816_c1_g1_i1.path1
Pepsico2_Contig20608.path1	TRINITY_DN969_c0_g2_i1.path1	TRINITY_DN21656_c0_g1_i1.path2	TRINITY_DN5933_c0_g1_i1.path1
TRINITY_DN7630_c0_g1_i1.path3	novel.2226	TRINITY_DN7772_c0_g1_i4.path1	Pepsico1_Contig5337.path1
Pepsico2_Contig8073.path1	TRINITY_DN44824_c0_g1_i1.path4	TRINITY_DN7127_c0_g2_i6.path1	TRINITY_DN12548_c0_g1_i3.path1
TRINITY_DN27891_c0_g2_i1.path1	TRINITY_DN11138_c1_g1_i2.path2	Pepsico2_Contig14627.path1	Pepsico2_Contig17052.path2
Pepsico2_Contig20023.path1	TRINITY_DN16373_c0_g1_i1.path1	TRINITY_DN17829_c0_g1_i1.path1	Pepsico2_Contig8757.path1
TRINITY_DN21030_c0_g2_i1.path1	novel.7475	TRINITY_DN49146_c0_g1_i1.path2	TRINITY_DN10806_c1_g3_i2.path1
Pepsico2_Contig19669.path1	Pepsico2_Contig1759.path1	novel.5183	Pepsico2_Contig4732.path1
Pepsico2_Contig3637.path2	TRINITY_DN55287_c0_g1_i1.path2	TRINITY_DN8371_c0_g1_i1.path1	novel.9825
TRINITY_DN1015_c0_g2_i2.path1	novel.3628	TRINITY_DN5904_c0_g1_i3.path1	novel.6927
novel.639	novel.2	TRINITY_DN32319_c0_g1_i1.path1	novel.6460
novel.2079	TRINITY_DN23140_c0_g1_i1.path1	novel.2134	TRINITY_DN12747_c0_g1_i1.path1
Pepsico1_Contig10882.path1	TRINITY_DN9693_c0_g1_i7.path1	TRINITY_DN24567_c0_g2_i1.path1	novel.8916
Pepsico2_Contig3793.path1	TRINITY_DN11150_c1_g2_i1.path1	TRINITY_DN16825_c0_g1_i7.path1	TRINITY_DN7127_c0_g2_i6.path1
novel.3926	TRINITY_DN4714_c0_g1_i9.path1	TRINITY_DN2337_c0_g1_i6.path1	TRINITY_DN39335_c0_g1_i1.path1
Pepsico1_Contig2141.path2	novel.4904	Pepsico1_Contig3093.path2	novel.5132
Pepsico1_Contig2258.path2	Pepsico2_Contig9276.path1	TRINITY_DN16421_c0_g1_i9.path3	TRINITY_DN2414_c1_g1_i3.path1
novel.5033	TRINITY_DN16702_c0_g1_i1.path1	Pepsico2_Contig6148.path2	novel.7569
Pepsico2_Contig5904.path1	TRINITY_DN16015_c0_g1_i1.path1	TRINITY_DN55287_c0_g1_i1.path4	TRINITY_DN43546_c0_g2_i1.path1
TRINITY_DN30724_c1_g1_i1.path1	TRINITY_DN12952_c0_g5_i1.path2	TRINITY_DN108824_c0_g1_i1.path1	novel.9211
novel.5776	TRINITY_DN4289_c0_g1_i2.path1	TRINITY_DN24619_c0_g1_i1.path1	novel.7004
TRINITY_DN31978_c0_g1_i1.path3	TRINITY_DN50781_c0_g1_i1.path1	TRINITY_DN112522_c0_g1_i1.path1	TRINITY_DN60652_c0_g1_i1.path1
Pepsico2_Contig4435.path1	novel.4679	TRINITY_DN16495_c0_g1_i1.path2	TRINITY_DN12207_c0_g1_i1.path1
TRINITY_DN36731_c0_g1_i1.path1	Pepsico2_Contig7727.path1	Pepsico1_Contig6523.path1	Pepsico2_Contig17681.path1
Pepsico2_Contig10033.path1	novel.2160	TRINITY_DN14061_c0_g2_i1.path2	Pepsico2_Contig7466.path1
Pepsico1_Contig2229.path3	TRINITY_DN41080_c0_g1_i1.path1	TRINITY_DN6751_c0_g1_i5.path1	Pepsico2_Contig1309.path1
TRINITY_DN16702_c0_g1_i1.path1	Pepsico2_Contig7773.path1	TRINITY_DN4515_c0_g1_i17.path2	TRINITY_DN14202_c0_g3_i2.path1
TRINITY_DN12758_c2_g2_i1.path1	TRINITY_DN12917_c0_g1_i1.path1	Pepsico2_Contig1104.path1	novel.2442
novel.2719	Pepsico2_Contig4961.path1	novel.4542	Pepsico2_Contig4966.path2
novel.1671	novel.4758	Pepsico2_Contig18011.path1	TRINITY_DN26074_c0_g1_i1.path1
Pepsico1_Contig5607.path1	TRINITY_DN3707_c0_g1_i10.path2	TRINITY_DN35046_c0_g2_i1.path1	TRINITY_DN19759_c0_g1_i2.path1
TRINITY_DN15701_c0_g2_i1.path1	TRINITY_DN1105_c0_g1_i2.path1	TRINITY_DN17463_c0_g1_i3.path3	TRINITY_DN79603_c0_g1_i1.path1
TRINITY_DN41957_c0_g1_i1.path1	Pepsico1_Contig1025.path1	Pepsico2_Contig5727.path3	TRINITY_DN7223_c0_g1_i5.path1
TRINITY_DN13217_c1_g1_i1.path1	TRINITY_DN97533_c0_g1_i1.path1	TRINITY_DN25012_c0_g2_i2.path1	TRINITY_DN2337_c0_g1_i6.path1
TRINITY_DN3870_c0_g1_i1.path1	novel.9616	Pepsico2_Contig15617.path1	novel.5183
TRINITY_DN9899_c0_g1_i1.path1	TRINITY_DN42186_c0_g2_i1.path1	TRINITY_DN11693_c2_g1_i1.path1	TRINITY_DN16614_c0_g2_i1.path1
Pepsico1_Contig910.path1	TRINITY_DN27219_c0_g1_i7.path1	Pepsico1_Contig585.path1	novel.2116
TRINITY_DN109068_c0_g1_i1.path1	novel.3889	novel.1576	novel.1005
TRINITY_DN1040_c0_g1_i1.path1	novel.4694	novel.9227	TRINITY_DN26639_c0_g1_i1.path1
TRINITY_DN24554_c0_g1_i1.path1	TRINITY_DN29785_c0_g1_i1.path1	Pepsico2_Contig9507.path1	TRINITY_DN21656_c0_g1_i1.path2
Pepsico2_Contig660.path1	TRINITY_DN2720_c0_g1_i2.path1	TRINITY_DN8639_c1_g1_i2.path1	Pepsico2_Contig13783.path1
novel.2119	TRINITY_DN96580_c0_g1_i1.path1	TRINITY_DN19468_c0_g2_i2.path1	TRINITY_DN31623_c1_g1_i1.path1
TRINITY_DN4502_c0_g2_i1.path1	novel.2234	novel.9373	TRINITY_DN7772_c0_g1_i4.path1
Pepsico1_Contig4678.path1	TRINITY_DN70626_c0_g1_i1.path1	novel.7148	TRINITY_DN20691_c0_g2_i1.path1
TRINITY_DN11349_c0_g1_i2.path2	Pepsico2_Contig7794.path1	novel.1175	Pepsico1_Contig78.path1
Pepsico2_Contig8062.path1	TRINITY_DN28154_c0_g1_i4.path1	TRINITY_DN320_c2_g1_i1.path2	novel.6006
TRINITY_DN3020_c1_g1_i4.path1	Pepsico2_Contig1967.path1	Pepsico2_Contig13783.path1	TRINITY_DN55287_c0_g1_i1.path4
TRINITY_DN17076_c0_g2_i1.path1	TRINITY_DN6662_c0_g1_i6.path1	TRINITY_DN2185_c0_g1_i8.path1	TRINITY_DN29886_c0_g2_i1.path1
Pepsico2_Contig17042.path1	Pepsico2_Contig10332.path1	TRINITY_DN5942_c1_g1_i4.path2	Pepsico2_Contig12784.path1
TRINITY_DN2720_c0_g1_i2.path1	novel.2818	TRINITY_DN20966_c0_g3_i1.path2	TRINITY_DN29620_c0_g2_i1.path1
novel.8410	TRINITY_DN83482_c0_g1_i1.path1	TRINITY_DN7127_c0_g2_i6.path2	TRINITY_DN18616_c0_g1_i4.path1
Pepsico2_Contig8879.path1	Pepsico2_Contig15617.path1	Pepsico1_Contig1873.path2	novel.2234
TRINITY_DN6488_c0_g1_i1.path3	TRINITY_DN14356_c1_g1_i10.path2	TRINITY_DN9568_c0_g1_i5.path1	Pepsico2_Contig15498.path1
TRINITY_DN18387_c0_g1_i3.path1	novel.7067	TRINITY_DN7819_c0_g1_i1.path1	TRINITY_DN24567_c0_g2_i1.path1
novel.8103	TRINITY_DN35046_c0_g2_i1.path1	novel.3594	TRINITY_DN42793_c0_g2_i1.path1
Pepsico2_Contig12299.path1	novel.6126	novel.2353	TRINITY_DN577_c0_g1_i8.path1
Pepsico1_Contig35948.path1	novel.6977	TRINITY_DN12929_c0_g1_i1.path2	Pepsico2_Contig11065.path1
novel.8861	TRINITY_DN26141_c0_g2_i1.path1	TRINITY_DN16977_c0_g1_i4.path1	TRINITY_DN70626_c0_g1_i1.path1
Pepsico2_Contig18182.path1	Pepsico2_Contig9970.path1	Pepsico2_Contig7466.path1	Pepsico2_Contig12726.path1
TRINITY_DN16585_c0_g1_i1.path1	TRINITY_DN4887_c0_g1_i6.path1	Pepsico2_Contig17321.path1	Pepsico1_Contig37083.path1
novel.4633	TRINITY_DN9291_c0_g1_i1.path1	TRINITY_DN9899_c0_g1_i1.path1	TRINITY_DN4515_c0_g1_i17.path2
TRINITY_DN35046_c0_g2_i1.path1	Pepsico2_Contig14877.path1	Pepsico2_Contig20779.path1	Pepsico2_Contig11254.path1
TRINITY_DN1599_c1_g1_i3.path1	Pepsico2_Contig2202.path1	TRINITY_DN19031_c0_g2_i1.path1	TRINITY_DN19468_c0_g2_i2.path1
TRINITY_DN7469_c0_g1_i1.path1	Pepsico2_Contig9173.path1	Pepsico1_Contig473.path1	Pepsico1_Contig1873.path2
novel.7004	TRINITY_DN80132_c0_g1_i1.path1	novel.6658	TRINITY_DN12664_c0_g1_i3.path2
Pepsico1_Contig3866.path1	TRINITY_DN1122_c0_g2_i1.path1	Pepsico2_Contig4411.path1	TRINITY_DN16509_c1_g1_i2.path1
TRINITY_DN33468_c0_g1_i2.path1	novel.6460	novel.5652	TRINITY_DN20691_c0_g2_i1.path2
TRINITY_DN43500_c0_g1_i1.path1	Pepsico2_Contig17149.path1	novel.2818	TRINITY_DN626_c0_g3_i1.path2
Pepsico1_Contig71.path1	novel.5856	Pepsico1_Contig1393.path1	TRINITY_DN8304_c0_g1_i4.path1
TRINITY_DN32389_c0_g1_i1.path1	novel.8548	Pepsico2_Contig1768.path1	novel.2134
TRINITY_DN13705_c0_g3_i1.path2	TRINITY_DN15198_c0_g1_i2.path2	TRINITY_DN3161_c0_g1_i1.path1	novel.7148
Pepsico1_Contig2258.path1	Pepsico1_Contig4130.path1	TRINITY_DN12040_c0_g1_i15.path2	TRINITY_DN12639_c0_g1_i6.path1
Pepsico2_Contig4421.path1	novel.2466	TRINITY_DN26074_c0_g1_i1.path1	Pepsico2_Contig16082.path1
Pepsico2_Contig1496.path1	novel.51	Pepsico2_Contig8062.path1	TRINITY_DN37359_c0_g1_i1.path3
TRINITY_DN272_c0_g1_i4.path1	TRINITY_DN10094_c0_g3_i1.path1	Pepsico2_Contig4950.path1	TRINITY_DN582_c2_g1_i6.path3
Pepsico2_Contig13209.path1	TRINITY_DN5482_c0_g1_i1.path1	novel.2802	Pepsico2_Contig17795.path1
TRINITY_DN50612_c0_g1_i1.path1	novel.1615	TRINITY_DN5816_c1_g1_i1.path1	TRINITY_DN78422_c0_g1_i2.path1
TRINITY_DN62636_c0_g1_i1.path1	TRINITY_DN15654_c1_g3_i1.path1	Pepsico2_Contig7869.path1	Pepsico2_Contig10148.path1
TRINITY_DN16513_c0_g2_i1.path1	TRINITY_DN18292_c0_g3_i1.path1	TRINITY_DN5401_c0_g1_i7.path1	novel.9681
novel.268	TRINITY_DN1966_c0_g1_i1.path1	Pepsico2_Contig16776.path1	TRINITY_DN25055_c0_g2_i1.path1
TRINITY_DN18638_c0_g1_i1.path1	TRINITY_DN36478_c0_g1_i3.path1	Pepsico2_Contig7843.path1	novel.2067
TRINITY_DN43227_c0_g1_i2.path1	Pepsico2_Contig7511.path1	TRINITY_DN14737_c0_g1_i1.path1	TRINITY_DN43155_c0_g1_i1.path1
novel.6260	Pepsico2_Contig2406.path1	novel.4368	TRINITY_DN32288_c0_g3_i1.path1
TRINITY_DN14541_c0_g1_i1.path2	TRINITY_DN25384_c0_g1_i1.path2	TRINITY_DN14877_c0_g1_i2.path1	TRINITY_DN8089_c0_g1_i3.path1
novel.1064	Pepsico2_Contig6539.path1	TRINITY_DN3163_c0_g1_i6.path1	TRINITY_DN36978_c0_g1_i1.path1
TRINITY_DN7127_c0_g2_i6.path2	TRINITY_DN21572_c0_g1_i1.path1	Pepsico2_Contig12375.path1	Pepsico2_Contig15246.path1
TRINITY_DN8939_c0_g1_i1.path1	TRINITY_DN9899_c0_g1_i1.path2	novel.3547	TRINITY_DN26530_c1_g1_i1.path2
novel.4977	TRINITY_DN13350_c0_g1_i1.path1	TRINITY_DN5942_c1_g1_i4.path1	novel.4038
TRINITY_DN10612_c0_g1_i14.path1	TRINITY_DN2098_c0_g2_i1.path1	Pepsico2_Contig1445.path1	Pepsico2_Contig9786.path1
Pepsico2_Contig20048.path1	TRINITY_DN37508_c0_g1_i2.path1	Pepsico1_Contig32793.path1	Pepsico2_Contig1180.path1
TRINITY_DN21016_c0_g1_i1.path1	TRINITY_DN26262_c0_g1_i1.path1	TRINITY_DN10471_c0_g3_i1.path1	novel.3399
TRINITY_DN14014_c0_g3_i1.path1	TRINITY_DN8820_c0_g1_i1.path1	Pepsico1_Contig415.path1	TRINITY_DN4506_c0_g1_i2.path1
TRINITY_DN4504_c1_g1_i2.path2	novel.5848	novel.9447	novel.8351
novel.8628	TRINITY_DN3634_c0_g1_i4.path2	Pepsico2_Contig14293.path1	TRINITY_DN21860_c0_g3_i2.path1
Pepsico1_Contig6527.path2	TRINITY_DN4523_c1_g1_i1.path1	novel.8153	Pepsico1_Contig916.path1
TRINITY_DN27832_c0_g1_i1.path2	novel.5925	TRINITY_DN4606_c0_g2_i1.path1	Pepsico2_Contig20286.path2
Pepsico2_Contig20393.path1	novel.7729	TRINITY_DN13622_c0_g3_i1.path1	novel.5717
Pepsico2_Contig4567.path1	TRINITY_DN4879_c0_g2_i1.path1	TRINITY_DN12548_c0_g1_i3.path1	TRINITY_DN19031_c0_g2_i1.path1
Pepsico2_Contig7984.path2	TRINITY_DN618_c0_g1_i2.path1	TRINITY_DN7264_c0_g1_i3.path1	TRINITY_DN5904_c0_g1_i3.path1
Pepsico1_Contig1064.path1	TRINITY_DN28145_c0_g3_i2.path1	novel.2098	TRINITY_DN99485_c0_g1_i1.path1
novel.6336	TRINITY_DN11785_c1_g1_i1.path1	TRINITY_DN33313_c0_g2_i2.path1	TRINITY_DN5767_c0_g1_i5.path1
Pepsico1_Contig514.path1	Pepsico2_Contig20393.path1	Pepsico2_Contig17795.path1	TRINITY_DN25461_c0_g1_i1.path1
TRINITY_DN9569_c0_g1_i3.path3	Pepsico2_Contig17571.path2	novel.10546	TRINITY_DN101169_c0_g1_i1.path1
TRINITY_DN61085_c0_g1_i1.path1	novel.7441	TRINITY_DN28245_c0_g2_i1.path2	novel.42
TRINITY_DN97339_c0_g1_i1.path1	TRINITY_DN10826_c0_g1_i2.path1	TRINITY_DN2414_c1_g1_i3.path1	TRINITY_DN35752_c0_g1_i2.path1
novel.1138	TRINITY_DN23496_c0_g1_i2.path2	TRINITY_DN6929_c1_g1_i4.path1	novel.2353
Pepsico1_Contig790.path1	TRINITY_DN79208_c0_g1_i1.path1	TRINITY_DN29073_c0_g1_i3.path2	TRINITY_DN37508_c0_g1_i2.path1
novel.5499	TRINITY_DN9154_c0_g2_i1.path1	TRINITY_DN7501_c0_g2_i1.path1	TRINITY_DN582_c2_g1_i6.path2
novel.368	novel.9353	TRINITY_DN4289_c0_g1_i2.path1	TRINITY_DN61085_c0_g1_i1.path1
TRINITY_DN17528_c0_g1_i1.path3	TRINITY_DN16286_c0_g1_i4.path1	TRINITY_DN3634_c0_g1_i4.path1	TRINITY_DN36478_c0_g1_i3.path1
Pepsico1_Contig854.path1	TRINITY_DN22077_c0_g1_i12.path2	Pepsico2_Contig19350.path1	TRINITY_DN6538_c0_g1_i1.path1
Pepsico2_Contig4818.path1	TRINITY_DN19250_c0_g1_i1.path1	TRINITY_DN21318_c0_g1_i1.path1	TRINITY_DN50781_c0_g1_i1.path1
Pepsico2_Contig1759.path1	TRINITY_DN16045_c1_g1_i4.path1	TRINITY_DN19150_c0_g1_i2.path1	Pepsico2_Contig16776.path1
TRINITY_DN42615_c0_g1_i3.path1	Pepsico2_Contig17803.path1	TRINITY_DN21493_c0_g1_i1.path1	TRINITY_DN41957_c0_g1_i1.path1
Pepsico2_Contig7809.path1	TRINITY_DN13830_c1_g1_i1.path1	TRINITY_DN2145_c0_g1_i1.path1	novel.2
TRINITY_DN15952_c1_g1_i2.path2	TRINITY_DN606_c0_g1_i1.path1	novel.3043	TRINITY_DN9154_c0_g2_i1.path1
Pepsico2_Contig9003.path1	TRINITY_DN23579_c0_g1_i1.path1	TRINITY_DN9385_c2_g1_i1.path1	TRINITY_DN5602_c0_g1_i1.path1
TRINITY_DN7307_c0_g1_i1.path1	TRINITY_DN9712_c0_g3_i2.path1	Pepsico2_Contig16082.path1	TRINITY_DN5931_c0_g1_i7.path1
TRINITY_DN71042_c0_g1_i1.path1	novel.4924	TRINITY_DN18199_c0_g1_i1.path2	TRINITY_DN91483_c0_g1_i1.path1
Pepsico2_Contig4408.path2	Pepsico2_Contig13844.path1	TRINITY_DN6390_c0_g1_i3.path1	TRINITY_DN3180_c0_g2_i1.path1
TRINITY_DN3216_c0_g1_i3.path2	TRINITY_DN11128_c0_g1_i8.path1	TRINITY_DN15455_c0_g1_i7.path1	TRINITY_DN10605_c0_g1_i2.path1
TRINITY_DN21357_c0_g1_i1.path1	novel.4450	Pepsico1_Contig1934.path1	novel.742
novel.1094	TRINITY_DN3271_c0_g1_i4.path3	novel.9649	TRINITY_DN11513_c0_g1_i3.path1
Pepsico2_Contig6624.path1	Pepsico1_Contig2034.path2	TRINITY_DN10738_c0_g2_i1.path2	TRINITY_DN555_c0_g1_i2.path1
TRINITY_DN25100_c0_g2_i2.path1	novel.7166	TRINITY_DN931_c0_g2_i2.path1	TRINITY_DN25287_c0_g2_i1.path1
Pepsico2_Contig13651.path1	TRINITY_DN13274_c0_g1_i1.path1	Pepsico2_Contig17718.path1	TRINITY_DN11076_c0_g1_i1.path2
TRINITY_DN39671_c0_g1_i1.path1	Pepsico2_Contig19859.path1	novel.1431	TRINITY_DN3843_c0_g1_i1.path1
Pepsico2_Contig7827.path1	TRINITY_DN652_c0_g1_i1.path1	Pepsico2_Contig12692.path4	novel.5652
TRINITY_DN19468_c0_g2_i2.path1	TRINITY_DN7687_c0_g1_i2.path1	novel.4538	TRINITY_DN96580_c0_g1_i1.path1
TRINITY_DN7146_c0_g1_i2.path3	Pepsico2_Contig4966.path2	TRINITY_DN43075_c0_g1_i2.path1	Pepsico1_Contig5044.path1
Pepsico2_Contig4262.path1	TRINITY_DN1139_c0_g1_i1.path1	novel.4836	novel.7518
TRINITY_DN10470_c0_g1_i2.path1	Pepsico2_Contig18065.path1	novel.2801	novel.8881
TRINITY_DN26611_c0_g2_i1.path1	novel.6254	TRINITY_DN1122_c0_g2_i1.path1	novel.6658
Pepsico2_Contig20227.path1	Pepsico2_Contig8879.path1	TRINITY_DN13763_c0_g1_i1.path1	Pepsico2_Contig19649.path3
TRINITY_DN98936_c0_g1_i1.path1	TRINITY_DN2188_c0_g1_i5.path1	TRINITY_DN11373_c1_g1_i12.path2	TRINITY_DN14533_c0_g1_i4.path2
TRINITY_DN15407_c0_g1_i3.path2	novel.5189	novel.828	Pepsico2_Contig11259.path1
TRINITY_DN25302_c0_g3_i2.path1	TRINITY_DN26074_c0_g1_i1.path1	TRINITY_DN32286_c0_g2_i1.path1	novel.3805
TRINITY_DN62636_c0_g1_i1.path2	TRINITY_DN5938_c0_g3_i1.path1	novel.4176	TRINITY_DN29096_c0_g1_i9.path1
TRINITY_DN14594_c0_g1_i1.path1	Pepsico2_Contig19397.path1	TRINITY_DN13908_c0_g4_i1.path1	Pepsico2_Contig15617.path1
TRINITY_DN38122_c0_g1_i1.path1	TRINITY_DN8132_c0_g1_i1.path1	TRINITY_DN43919_c0_g1_i1.path1	TRINITY_DN7127_c0_g2_i6.path2
TRINITY_DN14356_c1_g1_i10.path2	novel.1476	TRINITY_DN4640_c0_g2_i1.path1	TRINITY_DN9693_c0_g1_i7.path1
Pepsico2_Contig6161.path1	TRINITY_DN15455_c0_g1_i7.path3	Pepsico2_Contig14912.path1	novel.8153
TRINITY_DN107312_c0_g1_i1.path1	TRINITY_DN22363_c1_g1_i2.path1	TRINITY_DN13274_c0_g1_i1.path1	TRINITY_DN13270_c0_g1_i2.path1
Pepsico1_Contig7353.path1	TRINITY_DN5977_c0_g1_i1.path1	novel.2067	Pepsico1_Contig892.path2
TRINITY_DN23077_c0_g2_i1.path1	novel.1616	Pepsico2_Contig4152.path1	Pepsico2_Contig12957.path1
novel.2693	Pepsico2_Contig10648.path1	TRINITY_DN5482_c0_g1_i1.path1	TRINITY_DN10709_c0_g1_i3.path2
Pepsico1_Contig1934.path1	TRINITY_DN22425_c0_g1_i1.path1	TRINITY_DN6633_c0_g1_i5.path2	Pepsico2_Contig17023.path1
TRINITY_DN32046_c0_g1_i2.path1	Pepsico1_Contig37830.path1	TRINITY_DN9696_c0_g1_i1.path2	Pepsico2_Contig3516.path1
Pepsico1_Contig28290.path1	TRINITY_DN11558_c0_g1_i1.path1	TRINITY_DN52537_c0_g1_i1.path1	TRINITY_DN685_c1_g2_i1.path2
TRINITY_DN494_c0_g2_i4.path1	Pepsico2_Contig4927.path2	TRINITY_DN1984_c0_g1_i3.path1	novel.5635
TRINITY_DN10620_c0_g3_i1.path1	TRINITY_DN13270_c0_g1_i2.path1	TRINITY_DN11525_c0_g1_i21.path1	Pepsico2_Contig12802.path1
TRINITY_DN75967_c0_g1_i1.path1	novel.5132	TRINITY_DN18237_c0_g1_i2.path1	TRINITY_DN3677_c0_g1_i9.path1
novel.5132	TRINITY_DN63191_c0_g1_i1.path1	TRINITY_DN19834_c0_g1_i3.path2	TRINITY_DN7795_c0_g1_i6.path1
TRINITY_DN33151_c0_g1_i1.path1	TRINITY_DN25384_c0_g1_i1.path1	TRINITY_DN106836_c0_g1_i1.path1	TRINITY_DN9845_c0_g1_i2.path1
Pepsico2_Contig10834.path2	TRINITY_DN1387_c0_g1_i2.path2	TRINITY_DN41957_c0_g1_i1.path1	novel.9671
TRINITY_DN12244_c1_g2_i1.path1	novel.9736	TRINITY_DN90920_c0_g1_i1.path1	TRINITY_DN17829_c0_g1_i1.path1
TRINITY_DN53274_c0_g1_i1.path1	TRINITY_DN10471_c0_g3_i1.path1	Pepsico2_Contig14533.path1	novel.1625
novel.7202	TRINITY_DN5449_c0_g2_i1.path1	Pepsico1_Contig7763.path1	TRINITY_DN13622_c0_g3_i1.path1
TRINITY_DN4504_c1_g2_i1.path1	novel.5207	Pepsico2_Contig21049.path1	TRINITY_DN25120_c0_g1_i1.path1
Pepsico1_Contig7653.path1	TRINITY_DN1040_c0_g1_i1.path1	novel.5137	TRINITY_DN9196_c0_g1_i2.path1
novel.1431	novel.1857	Pepsico2_Contig783.path1	Pepsico2_Contig1721.path1
Pepsico2_Contig13689.path3	TRINITY_DN15602_c0_g1_i1.path1	novel.8470	TRINITY_DN4125_c0_g1_i3.path1
Pepsico1_Contig52.path2	TRINITY_DN4437_c0_g1_i2.path2	novel.6580	Pepsico1_Contig3021.path1
TRINITY_DN79208_c0_g1_i1.path1	TRINITY_DN4606_c0_g2_i1.path1	TRINITY_DN11017_c0_g2_i4.path3	TRINITY_DN23713_c0_g1_i1.path1
Pepsico2_Contig19649.path1	TRINITY_DN25100_c0_g2_i2.path1	novel.9333	TRINITY_DN7501_c0_g2_i1.path1
novel.5774	TRINITY_DN5401_c0_g1_i7.path1	Pepsico2_Contig14494.path1	Pepsico2_Contig2406.path2
Pepsico1_Contig686.path2	Pepsico2_Contig851.path1	novel.5132	TRINITY_DN9568_c0_g1_i5.path1
Pepsico2_Contig2387.path1	TRINITY_DN15095_c0_g1_i1.path1	Pepsico2_Contig10148.path1	Pepsico1_Contig7716.path1
Pepsico1_Contig4877.path1	TRINITY_DN7630_c0_g1_i1.path3	novel.6846	TRINITY_DN6551_c0_g4_i2.path1
TRINITY_DN743_c0_g1_i3.path2	Pepsico2_Contig12784.path1	TRINITY_DN11593_c1_g1_i7.path2	Pepsico2_Contig13136.path1
Pepsico2_Contig13724.path2	novel.7286	TRINITY_DN19250_c0_g1_i1.path1	TRINITY_DN11606_c0_g1_i4.path1
novel.1598	novel.9723	TRINITY_DN23079_c0_g1_i1.path2	Pepsico1_Contig3082.path1
TRINITY_DN94140_c0_g1_i1.path2	TRINITY_DN6189_c0_g2_i2.path1	TRINITY_DN13270_c0_g1_i2.path1	TRINITY_DN21493_c0_g1_i1.path1
Pepsico1_Contig1883.path1	novel.5643	TRINITY_DN2098_c1_g1_i5.path1	Pepsico2_Contig2406.path1
Pepsico1_Contig5243.path1	TRINITY_DN5355_c1_g1_i3.path1	TRINITY_DN9120_c1_g1_i2.path1	TRINITY_DN7264_c0_g1_i3.path1
Pepsico1_Contig2066.path1	TRINITY_DN3262_c0_g1_i4.path1	TRINITY_DN4027_c0_g5_i1.path1	TRINITY_DN15475_c0_g1_i1.path1
TRINITY_DN13971_c0_g2_i1.path1	novel.1513	TRINITY_DN22584_c0_g3_i1.path1	Pepsico2_Contig8591.path1
TRINITY_DN43131_c0_g1_i2.path1	TRINITY_DN3394_c1_g1_i3.path1	TRINITY_DN78855_c0_g1_i1.path1	TRINITY_DN1019_c0_g2_i1.path1
TRINITY_DN39008_c0_g1_i2.path1	TRINITY_DN25012_c0_g2_i2.path1	TRINITY_DN47113_c0_g3_i1.path1	Pepsico1_Contig5126.path1
TRINITY_DN8280_c0_g2_i1.path2	Pepsico2_Contig14530.path1	novel.8916	TRINITY_DN4289_c0_g1_i2.path1
novel.2454	TRINITY_DN4494_c0_g2_i2.path1	TRINITY_DN1040_c0_g1_i1.path1	TRINITY_DN35543_c0_g1_i4.path1
TRINITY_DN448_c0_g1_i4.path1	novel.3716	novel.1318	novel.9333
TRINITY_DN21996_c0_g1_i1.path1	TRINITY_DN45971_c0_g1_i3.path1	TRINITY_DN16767_c0_g1_i2.path1	Pepsico1_Contig2275.path2
novel.2313	TRINITY_DN7691_c0_g1_i1.path1	Pepsico1_Contig244.path1	Pepsico2_Contig10033.path1
Pepsico2_Contig9303.path1	Pepsico1_Contig2899.path1	TRINITY_DN8089_c0_g1_i3.path1	TRINITY_DN65056_c0_g1_i1.path1
novel.9447	Pepsico1_Contig3350.path2	TRINITY_DN9899_c0_g1_i1.path2	novel.8580
Pepsico2_Contig11507.path1	TRINITY_DN7127_c0_g2_i6.path1	TRINITY_DN16260_c0_g2_i1.path1	Pepsico2_Contig20779.path1
novel.3031	TRINITY_DN3163_c0_g1_i6.path1	TRINITY_DN14314_c1_g1_i2.path1	TRINITY_DN200_c0_g1_i2.path1
Pepsico1_Contig8045.path2	novel.5769	TRINITY_DN4484_c1_g1_i2.path1	TRINITY_DN10738_c0_g2_i1.path1
novel.5766	novel.6992	Pepsico1_Contig1433.path1	TRINITY_DN4532_c0_g1_i4.path2
novel.4138	TRINITY_DN79513_c0_g1_i1.path1	TRINITY_DN37834_c0_g4_i1.path1	TRINITY_DN17959_c1_g1_i1.path1
TRINITY_DN17226_c0_g1_i4.path2	novel.3962	novel.8601	TRINITY_DN4027_c0_g5_i1.path2
Pepsico2_Contig2217.path1	TRINITY_DN16825_c0_g1_i7.path1	Pepsico2_Contig17842.path1	Pepsico2_Contig367.path1
Pepsico1_Contig8012.path2	TRINITY_DN19392_c0_g2_i1.path1	TRINITY_DN7687_c0_g1_i2.path1	Pepsico2_Contig4961.path1
TRINITY_DN34253_c0_g1_i1.path1	TRINITY_DN9612_c0_g1_i1.path2	Pepsico1_Contig33714.path1	novel.3116
novel.6765	Pepsico2_Contig1104.path1	novel.8711	TRINITY_DN22103_c0_g1_i1.path1
TRINITY_DN43440_c0_g1_i1.path1	novel.4266	Pepsico2_Contig17404.path1	TRINITY_DN34417_c0_g2_i1.path1
TRINITY_DN51934_c0_g1_i1.path1	TRINITY_DN101432_c0_g1_i1.path1	TRINITY_DN431_c0_g1_i7.path2	TRINITY_DN4812_c0_g1_i1.path1
novel.5012	Pepsico1_Contig294.path1	TRINITY_DN27247_c0_g1_i1.path1	Pepsico1_Contig3661.path1
novel.290	TRINITY_DN11593_c1_g2_i1.path1	novel.8182	TRINITY_DN11195_c1_g1_i1.path2
TRINITY_DN52115_c0_g1_i2.path2	Pepsico1_Contig28290.path1	TRINITY_DN6300_c0_g1_i3.path1	Pepsico2_Contig17404.path1
novel.7729	Pepsico2_Contig6624.path1	TRINITY_DN12207_c0_g1_i1.path1	TRINITY_DN33690_c0_g1_i6.path1
novel.263	Pepsico2_Contig17718.path1	TRINITY_DN648_c1_g1_i8.path2	Pepsico2_Contig7426.path1
TRINITY_DN20528_c0_g1_i1.path1	Pepsico1_Contig15322.path1	TRINITY_DN18559_c0_g1_i2.path3	TRINITY_DN397_c0_g2_i1.path1
TRINITY_DN4523_c1_g1_i1.path1	TRINITY_DN14383_c0_g2_i2.path1	novel.3521	TRINITY_DN5482_c0_g1_i1.path1
TRINITY_DN95035_c0_g1_i1.path1	TRINITY_DN15282_c0_g1_i1.path1	TRINITY_DN3027_c0_g1_i4.path1	novel.5146
Pepsico1_Contig2379.path3	Pepsico2_Contig21198.path1	novel.7183	TRINITY_DN9701_c0_g1_i1.path1
novel.51	TRINITY_DN12464_c0_g1_i1.path1	novel.6930	Pepsico1_Contig792.path1
Pepsico1_Contig1933.path1	TRINITY_DN95487_c0_g1_i1.path1	novel.2116	TRINITY_DN19578_c0_g2_i1.path1
novel.2582	TRINITY_DN17793_c0_g3_i2.path1	novel.6977	TRINITY_DN24907_c0_g1_i4.path1
novel.2442	Pepsico1_Contig2381.path1	Pepsico2_Contig6611.path2	Pepsico2_Contig14533.path1
TRINITY_DN11150_c1_g2_i1.path1	TRINITY_DN4132_c1_g1_i1.path1	novel.5258	TRINITY_DN9696_c0_g1_i1.path2
TRINITY_DN1621_c0_g2_i4.path2	TRINITY_DN35164_c0_g1_i1.path1	novel.6264	novel.3717
TRINITY_DN37508_c0_g2_i1.path1	novel.280	novel.9609	TRINITY_DN494_c0_g1_i1.path1
Pepsico1_Contig533.path2	TRINITY_DN90920_c0_g1_i1.path1	TRINITY_DN29785_c0_g1_i1.path1	Pepsico2_Contig4818.path1
TRINITY_DN11138_c1_g1_i2.path2	Pepsico1_Contig6901.path2	TRINITY_DN7915_c0_g2_i2.path1	TRINITY_DN40776_c0_g1_i1.path1
Pepsico2_Contig5879.path1	TRINITY_DN771_c0_g1_i2.path1	novel.4299	TRINITY_DN19250_c0_g1_i1.path1
novel.7029	Pepsico2_Contig18206.path2	TRINITY_DN8237_c0_g1_i1.path1	TRINITY_DN23043_c0_g1_i5.path1
novel.5050	Pepsico1_Contig224.path1	Pepsico2_Contig7195.path2	TRINITY_DN9519_c0_g1_i4.path1
TRINITY_DN22012_c1_g1_i1.path1	TRINITY_DN26976_c0_g1_i3.path1	TRINITY_DN15149_c0_g1_i1.path1	novel.2141
TRINITY_DN12913_c0_g1_i2.path1	Pepsico2_Contig8462.path1	novel.5740	Pepsico2_Contig9173.path1
TRINITY_DN32510_c0_g1_i1.path1	novel.2516	novel.9681	novel.4821
TRINITY_DN15559_c0_g2_i2.path2	novel.4458	novel.826	Pepsico1_Contig5048.path1
TRINITY_DN3664_c0_g3_i1.path2	TRINITY_DN11586_c0_g2_i3.path1	Pepsico2_Contig1309.path1	novel.9353
Pepsico2_Contig17149.path2	TRINITY_DN55806_c0_g1_i1.path1	TRINITY_DN3664_c0_g3_i1.path2	TRINITY_DN7356_c0_g1_i8.path1
TRINITY_DN10097_c0_g1_i2.path1	Pepsico2_Contig10148.path1	TRINITY_DN28145_c0_g3_i2.path1	TRINITY_DN18756_c0_g1_i1.path1
TRINITY_DN32553_c0_g1_i1.path1	Pepsico2_Contig2004.path2	TRINITY_DN73578_c0_g1_i1.path1	novel.3398
novel.9323	TRINITY_DN91196_c0_g1_i1.path1	novel.7569	Pepsico2_Contig7869.path1
TRINITY_DN33361_c0_g1_i5.path2	Pepsico1_Contig7353.path1	novel.6941	novel.4114
TRINITY_DN23493_c0_g1_i1.path1	Pepsico2_Contig7175.path1	Pepsico2_Contig19106.path1	novel.7521
TRINITY_DN1139_c0_g1_i1.path1	TRINITY_DN2854_c0_g1_i1.path1	novel.6861	TRINITY_DN29964_c0_g3_i1.path1
Pepsico2_Contig372.path1	TRINITY_DN29271_c0_g1_i2.path3	TRINITY_DN22741_c0_g4_i1.path1	TRINITY_DN108916_c0_g1_i1.path1
TRINITY_DN33617_c0_g1_i1.path1	Pepsico2_Contig14627.path1	Pepsico1_Contig2034.path2	Pepsico2_Contig8062.path1
Pepsico2_Contig15617.path1	novel.9427	Pepsico2_Contig20349.path1	novel.7989
Pepsico2_Contig12367.path1	Pepsico2_Contig27.path1	Pepsico2_Contig5071.path1	Pepsico1_Contig1029.path1
Pepsico2_Contig17640.path1	Pepsico2_Contig2406.path2	Pepsico2_Contig17803.path1	Pepsico2_Contig11149.path1
Pepsico2_Contig6897.path1	Pepsico1_Contig2546.path3	novel.4694	TRINITY_DN78855_c0_g1_i1.path1
Pepsico2_Contig9370.path1	novel.2193	TRINITY_DN5321_c0_g1_i10.path2	TRINITY_DN82762_c0_g1_i1.path1
TRINITY_DN19573_c0_g1_i1.path1	TRINITY_DN3543_c0_g1_i5.path1	TRINITY_DN10806_c1_g3_i2.path1	Pepsico1_Contig1287.path1
novel.3473	Pepsico2_Contig19649.path3	TRINITY_DN11376_c0_g1_i5.path1	TRINITY_DN47113_c0_g3_i1.path1
Pepsico2_Contig1038.path1	TRINITY_DN15272_c0_g3_i1.path1	Pepsico1_Contig1524.path2	Pepsico2_Contig1744.path1
TRINITY_DN37359_c0_g1_i1.path3	TRINITY_DN94912_c0_g1_i1.path1	TRINITY_DN14955_c0_g1_i1.path1	TRINITY_DN11282_c2_g1_i1.path1
TRINITY_DN1569_c2_g2_i1.path1	TRINITY_DN7127_c0_g2_i6.path2	Pepsico1_Contig5984.path1	TRINITY_DN12676_c0_g1_i7.path1
TRINITY_DN20156_c0_g1_i2.path2	novel.2448	novel.2760	TRINITY_DN30113_c0_g1_i1.path1
TRINITY_DN25572_c0_g1_i1.path1	TRINITY_DN13323_c0_g2_i1.path1	TRINITY_DN19834_c0_g1_i3.path1	TRINITY_DN9659_c0_g2_i1.path2
Pepsico2_Contig11667.path1	novel.9857	TRINITY_DN12536_c0_g1_i4.path2	Pepsico2_Contig15179.path1
TRINITY_DN109491_c0_g1_i1.path1	Pepsico2_Contig6611.path4	TRINITY_DN20769_c0_g1_i1.path2	TRINITY_DN12129_c0_g1_i4.path2
TRINITY_DN18723_c0_g3_i9.path1	TRINITY_DN1459_c0_g2_i3.path1	TRINITY_DN23496_c0_g1_i2.path2	novel.3557
TRINITY_DN87711_c0_g1_i1.path1	TRINITY_DN16614_c0_g2_i1.path1	TRINITY_DN79513_c0_g1_i1.path1	TRINITY_DN21996_c0_g1_i1.path1
Pepsico1_Contig822.path1	Pepsico2_Contig8556.path2	TRINITY_DN23468_c0_g1_i2.path2	Pepsico2_Contig20395.path1
TRINITY_DN3394_c1_g1_i3.path1	TRINITY_DN96191_c0_g1_i1.path1	TRINITY_DN15272_c0_g2_i1.path1	TRINITY_DN42158_c0_g1_i1.path1
TRINITY_DN31087_c1_g1_i1.path1	Pepsico2_Contig4262.path1	TRINITY_DN8283_c0_g1_i1.path1	Pepsico2_Contig8092.path1
TRINITY_DN4453_c0_g1_i1.path1	TRINITY_DN26045_c0_g1_i4.path1	Pepsico1_Contig29103.path2	Pepsico2_Contig8389.path2
Pepsico2_Contig4851.path1	Pepsico2_Contig8591.path1	Pepsico2_Contig12957.path1	TRINITY_DN16522_c0_g1_i3.path2
TRINITY_DN1580_c0_g1_i4.path2	TRINITY_DN277_c2_g1_i1.path3	TRINITY_DN24525_c0_g1_i1.path1	TRINITY_DN42306_c0_g1_i3.path1
TRINITY_DN30113_c1_g1_i1.path1	TRINITY_DN94140_c0_g1_i1.path1	TRINITY_DN5138_c0_g1_i2.path2	novel.4694
TRINITY_DN29865_c0_g1_i1.path2	novel.9213	Pepsico1_Contig6644.path1	TRINITY_DN7687_c0_g1_i2.path1
novel.1041	TRINITY_DN17783_c0_g1_i3.path1	novel.6126	TRINITY_DN11138_c1_g1_i2.path2
TRINITY_DN15878_c0_g2_i1.path1	Pepsico2_Contig4539.path1	TRINITY_DN34220_c0_g1_i1.path1	TRINITY_DN9779_c1_g1_i1.path1
Pepsico2_Contig15090.path1	TRINITY_DN53169_c0_g1_i1.path1	TRINITY_DN1387_c0_g1_i2.path1	novel.7375
TRINITY_DN60733_c0_g1_i1.path2	TRINITY_DN4504_c1_g1_i2.path2	novel.9764	TRINITY_DN102507_c0_g1_i1.path1
TRINITY_DN28234_c0_g2_i1.path2	novel.5640	TRINITY_DN4225_c0_g1_i11.path1	Pepsico1_Contig415.path1
TRINITY_DN19577_c0_g2_i1.path1	TRINITY_DN21081_c0_g1_i1.path1	TRINITY_DN6774_c0_g1_i3.path1	TRINITY_DN79513_c0_g1_i1.path1
Pepsico1_Contig421.path1	novel.6995	Pepsico2_Contig791.path1	novel.1942
TRINITY_DN91480_c0_g1_i1.path1	novel.2116	novel.2361	TRINITY_DN20966_c0_g3_i1.path2
TRINITY_DN8929_c0_g1_i2.path1	novel.6131	novel.5145	novel.8294
TRINITY_DN4976_c0_g3_i1.path1	novel.7636	Pepsico2_Contig8488.path1	TRINITY_DN13963_c0_g1_i1.path1
TRINITY_DN14191_c0_g1_i1.path2	Pepsico2_Contig15364.path1	novel.8235	novel.3521
Pepsico2_Contig748.path1	novel.4368	novel.10125	TRINITY_DN1766_c0_g2_i2.path1
TRINITY_DN80803_c0_g1_i1.path1	TRINITY_DN10794_c1_g1_i3.path1	TRINITY_DN582_c2_g1_i6.path1	Pepsico2_Contig18183.path1
TRINITY_DN41090_c0_g1_i2.path2	novel.2291	Pepsico1_Contig4345.path1	TRINITY_DN1984_c0_g1_i3.path1
novel.2953	TRINITY_DN58751_c0_g1_i1.path1	TRINITY_DN7125_c0_g1_i8.path1	novel.4836
Pepsico2_Contig13121.path1	TRINITY_DN39335_c0_g1_i1.path2	novel.1308	TRINITY_DN2354_c0_g1_i4.path2
TRINITY_DN24316_c0_g1_i3.path1	novel.2119	TRINITY_DN23152_c0_g1_i1.path1	TRINITY_DN12536_c0_g1_i4.path2
Pepsico1_Contig814.path2	TRINITY_DN25287_c0_g3_i1.path1	TRINITY_DN7356_c0_g1_i8.path1	TRINITY_DN19732_c1_g1_i2.path2
TRINITY_DN249_c0_g3_i1.path1	TRINITY_DN35752_c0_g1_i2.path1	Pepsico2_Contig4425.path1	TRINITY_DN29565_c0_g1_i3.path3
TRINITY_DN68113_c0_g1_i1.path1	TRINITY_DN14410_c0_g1_i1.path1	TRINITY_DN22363_c1_g1_i2.path1	TRINITY_DN18140_c1_g1_i1.path2
TRINITY_DN44134_c0_g1_i3.path1	TRINITY_DN36995_c0_g2_i1.path1	Pepsico2_Contig1298.path1	Pepsico1_Contig1783.path1
Pepsico2_Contig16082.path1	TRINITY_DN40354_c0_g1_i2.path1	Pepsico1_Contig1029.path1	TRINITY_DN21918_c0_g1_i3.path1
TRINITY_DN245_c0_g2_i1.path1	TRINITY_DN9897_c0_g2_i1.path2	TRINITY_DN25055_c0_g2_i1.path1	TRINITY_DN20518_c0_g1_i1.path2
Pepsico2_Contig6378.path1	novel.3129	novel.1005	TRINITY_DN19203_c0_g1_i2.path1
TRINITY_DN20397_c0_g1_i1.path1	TRINITY_DN23438_c0_g1_i5.path1	novel.4458	Pepsico1_Contig10341.path1
TRINITY_DN2565_c0_g2_i3.path2	Pepsico2_Contig17842.path1	TRINITY_DN32603_c0_g1_i1.path1	TRINITY_DN5662_c0_g1_i3.path1
Pepsico2_Contig752.path1	TRINITY_DN7146_c0_g1_i2.path3	novel.1942	TRINITY_DN3027_c0_g1_i4.path1
TRINITY_DN25095_c0_g2_i1.path1	Pepsico1_Contig4345.path1	novel.1820	Pepsico2_Contig2980.path1
TRINITY_DN80128_c0_g1_i1.path1	TRINITY_DN28038_c0_g1_i1.path1	novel.7286	Pepsico2_Contig8556.path2
novel.2937	TRINITY_DN4812_c0_g1_i1.path1	TRINITY_DN38451_c0_g1_i8.path1	TRINITY_DN11181_c0_g1_i3.path1
novel.2398	TRINITY_DN21050_c0_g1_i1.path1	TRINITY_DN1928_c0_g1_i7.path1	Pepsico1_Contig32727.path1
TRINITY_DN30284_c0_g1_i1.path1	novel.2121	Pepsico1_Contig8040.path2	Pepsico2_Contig3015.path1
novel.3081	TRINITY_DN90723_c0_g1_i1.path1	Pepsico2_Contig16657.path3	TRINITY_DN23468_c0_g1_i2.path2
TRINITY_DN3567_c0_g2_i2.path1	Pepsico2_Contig7109.path1	Pepsico2_Contig17023.path1	Pepsico2_Contig9556.path1
TRINITY_DN5174_c1_g1_i2.path1	TRINITY_DN16507_c0_g1_i2.path1	Pepsico2_Contig18178.path1	TRINITY_DN46218_c0_g1_i1.path1
Pepsico2_Contig8532.path1	TRINITY_DN7145_c0_g1_i6.path2	TRINITY_DN25384_c0_g1_i1.path1	TRINITY_DN1945_c0_g1_i3.path1
TRINITY_DN75610_c0_g1_i1.path1	TRINITY_DN23642_c0_g2_i1.path1	TRINITY_DN20944_c0_g1_i5.path1	TRINITY_DN13000_c0_g2_i2.path1
TRINITY_DN969_c0_g2_i1.path1	TRINITY_DN4449_c0_g1_i3.path2	novel.7701	novel.1308
Pepsico2_Contig7843.path1	Pepsico2_Contig19853.path1	TRINITY_DN6454_c0_g2_i1.path1	TRINITY_DN24316_c0_g1_i3.path1
novel.7508	TRINITY_DN24554_c0_g1_i1.path1	Pepsico1_Contig2398.path2	TRINITY_DN71743_c0_g1_i1.path1
TRINITY_DN69448_c0_g1_i1.path1	novel.1175	Pepsico2_Contig13783.path2	novel.8470
Pepsico2_Contig4586.path1	Pepsico2_Contig1309.path1	Pepsico2_Contig19649.path3	Pepsico2_Contig4402.path1
TRINITY_DN22429_c0_g2_i1.path1	Pepsico1_Contig2546.path1	TRINITY_DN9897_c0_g2_i1.path2	TRINITY_DN5355_c1_g1_i3.path1
novel.82	Pepsico2_Contig9312.path1	Pepsico2_Contig20286.path1	novel.5192
TRINITY_DN22284_c0_g2_i1.path1	Pepsico2_Contig4029.path1	TRINITY_DN94140_c0_g1_i1.path1	TRINITY_DN14904_c0_g1_i1.path2
TRINITY_DN24179_c1_g1_i1.path1	TRINITY_DN12548_c0_g1_i3.path1	Pepsico1_Contig1880.path1	novel.6170
TRINITY_DN61322_c0_g1_i1.path1	TRINITY_DN26096_c0_g1_i4.path1	novel.8548	novel.9227
TRINITY_DN16818_c0_g3_i1.path1	TRINITY_DN7691_c1_g2_i1.path1	Pepsico1_Contig1934.path2	Pepsico2_Contig15152.path1
Pepsico1_Contig1934.path2	TRINITY_DN53274_c0_g1_i1.path1	novel.1105	TRINITY_DN2864_c0_g1_i5.path1
novel.7110	TRINITY_DN5138_c0_g1_i2.path2	Pepsico1_Contig2462.path1	Pepsico2_Contig3495.path1
TRINITY_DN33623_c0_g1_i3.path1	TRINITY_DN29620_c0_g2_i1.path1	novel.10016	TRINITY_DN4576_c0_g1_i2.path1
TRINITY_DN22560_c0_g1_i4.path1	Pepsico2_Contig20569.path1	Pepsico2_Contig14315.path1	TRINITY_DN29271_c0_g1_i2.path3
TRINITY_DN6390_c0_g1_i3.path1	novel.9909	TRINITY_DN9392_c0_g1_i5.path1	TRINITY_DN6929_c1_g1_i4.path1
novel.6364	novel.6394	novel.6006	novel.2098
TRINITY_DN73289_c0_g1_i1.path1	novel.2953	novel.7138	Pepsico1_Contig171.path1
TRINITY_DN13809_c0_g2_i2.path1	novel.9492	TRINITY_DN18489_c1_g1_i1.path1	TRINITY_DN44353_c0_g1_i1.path1
TRINITY_DN25572_c0_g1_i1.path2	novel.7165	TRINITY_DN15642_c0_g1_i4.path1	novel.4904
TRINITY_DN19341_c0_g1_i1.path2	Pepsico2_Contig21049.path1	Pepsico2_Contig6624.path1	TRINITY_DN6633_c0_g1_i5.path2
TRINITY_DN13715_c0_g1_i1.path1	TRINITY_DN48507_c0_g1_i1.path2	TRINITY_DN9845_c0_g1_i2.path1	novel.6977
TRINITY_DN15613_c0_g1_i3.path2	Pepsico2_Contig6463.path1	novel.9457	TRINITY_DN94140_c0_g1_i1.path1
TRINITY_DN96580_c0_g1_i1.path1	TRINITY_DN3739_c0_g1_i2.path1	TRINITY_DN56218_c0_g1_i1.path1	TRINITY_DN14877_c0_g1_i2.path1
Pepsico1_Contig38218.path1	novel.5258	TRINITY_DN4515_c0_g1_i17.path3	TRINITY_DN13323_c0_g2_i1.path1
TRINITY_DN5968_c0_g1_i3.path1	TRINITY_DN2377_c0_g1_i1.path1	Pepsico2_Contig13724.path1	TRINITY_DN9737_c1_g5_i2.path1
Pepsico2_Contig19818.path2	Pepsico2_Contig18089.path1	Pepsico1_Contig7932.path1	novel.3460
TRINITY_DN15524_c0_g1_i1.path1	TRINITY_DN15272_c0_g2_i1.path1	TRINITY_DN15878_c0_g1_i6.path1	Pepsico2_Contig8879.path1
novel.8808	Pepsico2_Contig13724.path1	Pepsico2_Contig9276.path1	novel.3955
Pepsico1_Contig30548.path2	TRINITY_DN26639_c0_g1_i1.path1	TRINITY_DN14737_c0_g1_i1.path2	TRINITY_DN17775_c0_g2_i1.path1
TRINITY_DN8715_c0_g1_i2.path2	Pepsico2_Contig17410.path1	novel.7507	Pepsico2_Contig18850.path1
TRINITY_DN7311_c0_g1_i1.path1	novel.8916	TRINITY_DN626_c0_g3_i1.path2	TRINITY_DN34811_c1_g1_i1.path1
novel.8401	TRINITY_DN8291_c1_g3_i8.path1	TRINITY_DN5482_c0_g1_i1.path2	TRINITY_DN3419_c0_g1_i1.path1
TRINITY_DN21687_c0_g1_i1.path1	Pepsico2_Contig7843.path1	novel.7846	Pepsico2_Contig27.path1
Pepsico2_Contig2004.path2	TRINITY_DN59680_c0_g1_i1.path1	novel.3904	Pepsico1_Contig1034.path1
Pepsico1_Contig2210.path1	TRINITY_DN15239_c0_g1_i10.path1	TRINITY_DN17775_c0_g2_i1.path1	TRINITY_DN32510_c0_g1_i1.path1
TRINITY_DN99623_c0_g1_i1.path1	Pepsico1_Contig4877.path1	novel.2121	novel.9373
TRINITY_DN50089_c0_g1_i4.path1	TRINITY_DN32603_c0_g1_i1.path1	TRINITY_DN4125_c0_g1_i3.path1	novel.4299
TRINITY_DN59616_c0_g1_i1.path1	TRINITY_DN9120_c1_g1_i2.path1	TRINITY_DN55287_c0_g1_i1.path2	Pepsico1_Contig3093.path2
TRINITY_DN100308_c0_g1_i1.path1	Pepsico2_Contig7732.path2	novel.5044	TRINITY_DN90490_c0_g1_i1.path1
TRINITY_DN6774_c0_g1_i3.path1	TRINITY_DN61322_c0_g1_i1.path1	Pepsico2_Contig15498.path1	TRINITY_DN91049_c0_g1_i1.path2
TRINITY_DN43677_c0_g2_i2.path1	TRINITY_DN43808_c0_g4_i1.path1	novel.678	TRINITY_DN23079_c0_g1_i1.path2
TRINITY_DN35511_c0_g2_i1.path1	TRINITY_DN49612_c0_g1_i1.path1	TRINITY_DN13895_c0_g1_i2.path1	TRINITY_DN25384_c0_g1_i1.path1
novel.3547	Pepsico2_Contig3282.path2	TRINITY_DN42158_c0_g1_i1.path1	TRINITY_DN276_c1_g1_i1.path1
TRINITY_DN10806_c1_g2_i8.path1	TRINITY_DN19150_c0_g1_i2.path1	TRINITY_DN1019_c0_g2_i1.path1	novel.2791
novel.9555	TRINITY_DN32609_c0_g1_i2.path1	Pepsico1_Contig2275.path2	TRINITY_DN13582_c0_g1_i3.path1
novel.7247	TRINITY_DN17766_c0_g1_i1.path1	TRINITY_DN15884_c0_g2_i4.path2	TRINITY_DN10547_c0_g1_i17.path1
novel.4917	TRINITY_DN38775_c0_g1_i1.path1	TRINITY_DN63191_c0_g1_i1.path1	TRINITY_DN61305_c0_g1_i1.path1
TRINITY_DN16373_c0_g1_i1.path1	TRINITY_DN7068_c0_g1_i5.path1	TRINITY_DN25287_c0_g2_i1.path1	TRINITY_DN24042_c0_g1_i2.path1
TRINITY_DN44510_c0_g1_i1.path1	novel.3063	TRINITY_DN12132_c0_g2_i1.path1	TRINITY_DN37834_c0_g4_i1.path1
TRINITY_DN3540_c1_g1_i3.path3	novel.4929	novel.2969	TRINITY_DN4523_c1_g1_i1.path1
TRINITY_DN8448_c0_g1_i3.path1	novel.126	TRINITY_DN8283_c0_g1_i1.path2	TRINITY_DN106700_c0_g1_i1.path1
TRINITY_DN12548_c0_g1_i3.path1	novel.6170	novel.5499	novel.9297
Pepsico2_Contig7109.path1	Pepsico2_Contig19106.path1	novel.4082	TRINITY_DN88632_c0_g1_i1.path1
novel.4266	TRINITY_DN7178_c0_g2_i1.path1	novel.7626	Pepsico2_Contig9040.path1
TRINITY_DN3543_c2_g1_i1.path1	novel.5774	TRINITY_DN23438_c0_g1_i5.path1	TRINITY_DN6454_c0_g2_i1.path1
TRINITY_DN34205_c0_g1_i1.path3	Pepsico2_Contig11122.path1	TRINITY_DN37508_c0_g1_i2.path1	novel.1758
Pepsico2_Contig21049.path1	TRINITY_DN22881_c0_g1_i4.path2	Pepsico1_Contig28749.path1	Pepsico2_Contig19393.path1
TRINITY_DN68974_c0_g1_i1.path1	Pepsico2_Contig13838.path2	TRINITY_DN11128_c0_g1_i8.path1	Pepsico2_Contig16657.path3
Pepsico2_Contig7511.path1	TRINITY_DN18692_c2_g1_i1.path1	TRINITY_DN4595_c0_g3_i1.path2	TRINITY_DN15884_c0_g2_i4.path2
TRINITY_DN21572_c0_g1_i1.path1	novel.8008	TRINITY_DN9196_c0_g1_i2.path1	TRINITY_DN9673_c0_g1_i1.path1
novel.8487	novel.6264	novel.2457	TRINITY_DN24014_c0_g1_i1.path1
TRINITY_DN5232_c0_g1_i7.path1	Pepsico2_Contig12076.path1	novel.5751	TRINITY_DN28511_c0_g1_i5.path1
TRINITY_DN23468_c0_g1_i2.path2	Pepsico2_Contig19497.path1	TRINITY_DN23948_c0_g2_i1.path1	TRINITY_DN52988_c0_g1_i1.path1
TRINITY_DN6662_c0_g1_i6.path1	Pepsico2_Contig13889.path2	novel.7475	TRINITY_DN9421_c0_g2_i6.path1
TRINITY_DN32319_c0_g1_i1.path1	TRINITY_DN22741_c0_g4_i1.path1	TRINITY_DN15878_c0_g1_i6.path2	TRINITY_DN11593_c1_g2_i1.path1
Pepsico1_Contig228.path1	Pepsico2_Contig16082.path1	TRINITY_DN32510_c0_g1_i1.path1	novel.682
Pepsico1_Contig1451.path2	novel.8058	Pepsico2_Contig1759.path1	TRINITY_DN14594_c0_g2_i1.path1
novel.6905	TRINITY_DN106297_c0_g1_i1.path1	Pepsico1_Contig6100.path1	novel.6630
Pepsico2_Contig20651.path2	TRINITY_DN33468_c0_g1_i2.path2	TRINITY_DN33170_c0_g1_i1.path1	TRINITY_DN8237_c0_g1_i1.path1
Pepsico2_Contig12412.path1	Pepsico1_Contig1064.path2	TRINITY_DN36978_c0_g1_i1.path1	TRINITY_DN35240_c0_g1_i15.path1
TRINITY_DN293_c0_g1_i3.path1	TRINITY_DN71191_c0_g1_i1.path1	TRINITY_DN17783_c0_g1_i3.path1	TRINITY_DN14775_c0_g1_i8.path1
TRINITY_DN14443_c0_g2_i4.path1	TRINITY_DN15885_c0_g1_i1.path2	Pepsico2_Contig8462.path1	TRINITY_DN8509_c0_g1_i3.path1
TRINITY_DN31212_c0_g2_i1.path1	novel.8944	Pepsico2_Contig8092.path1	Pepsico2_Contig19350.path1
Pepsico2_Contig9091.path1	TRINITY_DN648_c1_g1_i8.path1	TRINITY_DN2053_c0_g1_i15.path1	novel.4458
novel.4123	Pepsico2_Contig1861.path1	TRINITY_DN89139_c0_g1_i1.path1	novel.3971
TRINITY_DN33104_c0_g2_i1.path1	Pepsico2_Contig15323.path1	Pepsico2_Contig9165.path2	TRINITY_DN37972_c0_g1_i2.path2
Pepsico1_Contig695.path1	novel.5700	TRINITY_DN99485_c0_g1_i1.path1	TRINITY_DN23152_c0_g1_i1.path1
Pepsico1_Contig1984.path1	TRINITY_DN10118_c0_g1_i2.path1	TRINITY_DN582_c2_g1_i6.path2	TRINITY_DN3073_c1_g1_i2.path1
Pepsico1_Contig7260.path2	TRINITY_DN14737_c0_g1_i1.path2	Pepsico2_Contig18624.path1	TRINITY_DN15198_c0_g1_i2.path1
TRINITY_DN55123_c0_g1_i1.path1	TRINITY_DN47812_c0_g1_i2.path1	TRINITY_DN21050_c0_g1_i1.path1	Pepsico2_Contig9003.path1
TRINITY_DN9421_c0_g1_i1.path2	novel.6029	TRINITY_DN49612_c0_g1_i1.path1	TRINITY_DN13498_c0_g2_i1.path1
TRINITY_DN19695_c0_g3_i1.path1	Pepsico1_Contig2378.path1	Pepsico1_Contig10341.path1	TRINITY_DN41312_c0_g1_i1.path1
TRINITY_DN13254_c1_g1_i1.path1	TRINITY_DN19898_c0_g5_i2.path1	novel.5207	novel.6126
Pepsico1_Contig601.path1	TRINITY_DN18815_c0_g2_i2.path1	TRINITY_DN245_c0_g2_i1.path1	Pepsico2_Contig1298.path1
Pepsico2_Contig4899.path1	novel.8601	Pepsico2_Contig14877.path1	novel.4778
Pepsico1_Contig558.path2	TRINITY_DN2850_c0_g3_i1.path1	TRINITY_DN43817_c0_g1_i1.path1	TRINITY_DN2644_c1_g1_i2.path1
novel.9213	TRINITY_DN1968_c0_g1_i4.path2	novel.2117	Pepsico2_Contig4950.path1
Pepsico1_Contig6915.path1	TRINITY_DN16279_c0_g1_i1.path3	Pepsico2_Contig7511.path1	TRINITY_DN19308_c0_g1_i4.path1
novel.5655	TRINITY_DN17959_c1_g1_i1.path1	TRINITY_DN22560_c0_g1_i4.path1	TRINITY_DN9623_c0_g1_i1.path2
Pepsico2_Contig17383.path1	Pepsico2_Contig17058.path1	TRINITY_DN5602_c0_g1_i1.path1	novel.4679
TRINITY_DN2850_c0_g3_i1.path1	TRINITY_DN1599_c1_g1_i3.path1	TRINITY_DN4812_c0_g1_i1.path1	TRINITY_DN18237_c0_g1_i2.path1
Pepsico1_Contig1793.path1	TRINITY_DN19578_c0_g2_i1.path1	TRINITY_DN23140_c0_g1_i1.path1	TRINITY_DN55287_c0_g1_i1.path2
TRINITY_DN90811_c0_g1_i1.path1	TRINITY_DN12536_c0_g1_i4.path2	TRINITY_DN1387_c0_g1_i2.path2	novel.8144
novel.5416	novel.5863	TRINITY_DN39335_c0_g1_i1.path1	TRINITY_DN18815_c0_g2_i2.path1
novel.4632	TRINITY_DN90864_c0_g1_i1.path1	TRINITY_DN55504_c0_g1_i1.path1	TRINITY_DN3731_c0_g2_i1.path1
TRINITY_DN3523_c1_g2_i2.path1	TRINITY_DN9136_c1_g4_i1.path1	novel.6995	TRINITY_DN27456_c0_g1_i1.path1
TRINITY_DN45866_c0_g1_i1.path1	TRINITY_DN2450_c1_g2_i1.path1	TRINITY_DN4523_c1_g1_i1.path1	TRINITY_DN20944_c0_g1_i5.path1
TRINITY_DN99452_c0_g1_i1.path1	novel.2798	Pepsico1_Contig5044.path1	novel.2677
Pepsico2_Contig17047.path1	Pepsico2_Contig20349.path1	Pepsico2_Contig20393.path1	TRINITY_DN2702_c0_g3_i3.path1
Pepsico1_Contig1514.path1	TRINITY_DN16114_c0_g1_i3.path1	TRINITY_DN102507_c0_g1_i1.path1	TRINITY_DN7816_c0_g1_i1.path2
Pepsico2_Contig15229.path1	TRINITY_DN2098_c1_g1_i5.path1	novel.10371	TRINITY_DN26184_c0_g1_i2.path1
Pepsico2_Contig6107.path1	novel.8131	TRINITY_DN43075_c0_g1_i2.path2	TRINITY_DN16767_c0_g1_i2.path1
TRINITY_DN2565_c0_g2_i3.path1	novel.4067	TRINITY_DN1928_c0_g1_i7.path2	TRINITY_DN14410_c0_g1_i1.path1
TRINITY_DN29785_c0_g1_i1.path1	novel.3473	Pepsico2_Contig18850.path1	TRINITY_DN10194_c0_g1_i1.path1
TRINITY_DN61247_c0_g1_i1.path1	Pepsico2_Contig638.path2	novel.7249	Pepsico1_Contig1534.path1
TRINITY_DN11717_c0_g2_i2.path1	Pepsico2_Contig31.path1	Pepsico2_Contig12060.path1	TRINITY_DN29785_c0_g1_i1.path1
Pepsico2_Contig13077.path2	TRINITY_DN14775_c0_g1_i8.path1	novel.5932	TRINITY_DN18228_c0_g1_i4.path1
novel.9809	Pepsico1_Contig2378.path2	novel.9156	Pepsico2_Contig12259.path1
Pepsico1_Contig7432.path3	novel.3593	TRINITY_DN25120_c0_g1_i1.path1	TRINITY_DN14737_c0_g1_i1.path1
TRINITY_DN27643_c0_g1_i3.path2	TRINITY_DN6751_c0_g1_i5.path1	Pepsico2_Contig3506.path1	novel.9809
TRINITY_DN61215_c0_g1_i1.path1	TRINITY_DN9569_c0_g1_i3.path3	Pepsico1_Contig6934.path1	TRINITY_DN6774_c0_g1_i3.path1
novel.9685	TRINITY_DN19759_c0_g2_i2.path1	TRINITY_DN23579_c0_g1_i1.path1	TRINITY_DN13763_c0_g1_i1.path1
Pepsico2_Contig8600.path1	Pepsico1_Contig3100.path2	novel.2274	TRINITY_DN10796_c0_g1_i1.path1
Pepsico1_Contig6102.path1	TRINITY_DN17273_c0_g1_i1.path1	novel.9809	TRINITY_DN49612_c0_g1_i1.path1
TRINITY_DN49612_c0_g1_i1.path1	TRINITY_DN33800_c0_g1_i2.path2	TRINITY_DN61322_c0_g1_i1.path1	TRINITY_DN20762_c0_g1_i1.path1
TRINITY_DN32509_c0_g1_i2.path1	Pepsico2_Contig16672.path1	Pepsico2_Contig19787.path1	TRINITY_DN13705_c0_g3_i1.path2
Pepsico2_Contig19157.path1	novel.9752	TRINITY_DN19898_c0_g5_i2.path1	TRINITY_DN11128_c0_g1_i8.path1
Pepsico1_Contig916.path1	TRINITY_DN11138_c1_g1_i2.path1	TRINITY_DN966_c0_g2_i3.path1	TRINITY_DN5482_c0_g1_i1.path2
TRINITY_DN4360_c2_g1_i3.path2	TRINITY_DN87669_c0_g1_i1.path1	Pepsico1_Contig7716.path1	TRINITY_DN16589_c0_g3_i3.path1
Pepsico2_Contig6148.path1	TRINITY_DN16567_c0_g1_i1.path1	TRINITY_DN18468_c0_g1_i6.path1	TRINITY_DN2854_c0_g1_i1.path1
Pepsico1_Contig2229.path1	Pepsico2_Contig19525.path2	Pepsico1_Contig6478.path1	TRINITY_DN7521_c0_g1_i1.path2
Pepsico1_Contig558.path1	Pepsico2_Contig19271.path1	Pepsico1_Contig1891.path1	TRINITY_DN23077_c0_g2_i1.path1
Pepsico1_Contig111.path1	TRINITY_DN11167_c2_g1_i1.path1	Pepsico2_Contig17563.path2	TRINITY_DN34220_c0_g1_i1.path1
novel.6995	TRINITY_DN20290_c0_g1_i2.path1	TRINITY_DN4027_c0_g5_i1.path2	novel.3858
TRINITY_DN31093_c0_g2_i2.path2	TRINITY_DN4518_c0_g2_i1.path1	novel.3259	TRINITY_DN63191_c0_g1_i1.path1
TRINITY_DN17862_c0_g1_i5.path1	TRINITY_DN26240_c0_g1_i1.path2	TRINITY_DN96580_c0_g1_i1.path1	Pepsico2_Contig19863.path1
novel.4936	TRINITY_DN34598_c0_g1_i2.path1	Pepsico2_Contig13209.path1	Pepsico1_Contig2142.path1
Pepsico1_Contig2381.path1	novel.9227	TRINITY_DN12129_c0_g1_i4.path2	Pepsico2_Contig3799.path1
novel.1565	TRINITY_DN15762_c0_g2_i2.path1	novel.3826	TRINITY_DN16260_c0_g2_i1.path1
TRINITY_DN20488_c0_g1_i4.path1	TRINITY_DN30939_c0_g1_i2.path1	Pepsico2_Contig15246.path1	TRINITY_DN26281_c0_g2_i1.path1
novel.2782	novel.2782	TRINITY_DN23713_c0_g1_i1.path1	TRINITY_DN15455_c0_g1_i7.path1
Pepsico1_Contig7769.path1	novel.5177	Pepsico2_Contig8.path1	TRINITY_DN1387_c0_g1_i2.path2
TRINITY_DN24786_c0_g1_i1.path1	novel.1912	Pepsico1_Contig3661.path1	Pepsico2_Contig17288.path1
Pepsico2_Contig6539.path1	novel.3002	TRINITY_DN29865_c0_g1_i1.path2	TRINITY_DN15916_c0_g1_i1.path1
novel.7636	novel.1301	TRINITY_DN17397_c0_g1_i2.path1	TRINITY_DN58751_c0_g1_i1.path1
novel.1213	novel.7557	TRINITY_DN83482_c0_g1_i1.path1	TRINITY_DN23390_c0_g1_i1.path1
TRINITY_DN35164_c0_g1_i1.path1	TRINITY_DN8500_c0_g1_i2.path1	TRINITY_DN38775_c0_g1_i1.path1	TRINITY_DN19898_c0_g5_i2.path1
novel.9330	TRINITY_DN16298_c0_g2_i1.path1	TRINITY_DN112669_c0_g1_i1.path1	Pepsico2_Contig7348.path1
Pepsico2_Contig7809.path2	TRINITY_DN10806_c1_g3_i2.path1	TRINITY_DN12676_c0_g1_i7.path1	TRINITY_DN22584_c1_g1_i1.path1
Pepsico1_Contig2275.path2	Pepsico2_Contig1581.path1	TRINITY_DN37282_c0_g1_i1.path2	novel.7475
TRINITY_DN7193_c0_g1_i2.path1	TRINITY_DN10467_c0_g1_i3.path1	TRINITY_DN12642_c0_g1_i9.path1	TRINITY_DN5942_c1_g1_i4.path2
Pepsico1_Contig3224.path1	TRINITY_DN20165_c0_g1_i1.path1	TRINITY_DN16702_c0_g1_i1.path1	Pepsico2_Contig20128.path1
TRINITY_DN54476_c0_g1_i1.path1	Pepsico2_Contig12716.path1	TRINITY_DN7122_c0_g1_i3.path1	TRINITY_DN43484_c0_g1_i1.path1
TRINITY_DN16151_c0_g4_i1.path1	TRINITY_DN35718_c0_g2_i4.path1	TRINITY_DN11406_c0_g1_i1.path1	TRINITY_DN3331_c0_g1_i1.path1
TRINITY_DN7687_c0_g1_i2.path2	novel.2946	Pepsico2_Contig4966.path2	novel.7138
novel.243	TRINITY_DN4532_c0_g1_i4.path2	Pepsico2_Contig4402.path1	TRINITY_DN25287_c0_g3_i1.path1
Pepsico2_Contig19670.path1	TRINITY_DN36019_c1_g1_i1.path2	novel.2791	TRINITY_DN11593_c1_g1_i7.path2
Pepsico1_Contig6287.path1	TRINITY_DN10134_c0_g1_i1.path1	TRINITY_DN14533_c0_g1_i4.path2	TRINITY_DN12498_c0_g1_i2.path1
TRINITY_DN26281_c0_g2_i1.path1	novel.6544	TRINITY_DN16403_c0_g1_i3.path1	novel.766
TRINITY_DN2308_c0_g1_i5.path1	Pepsico2_Contig10852.path2	TRINITY_DN4502_c2_g1_i1.path1	TRINITY_DN245_c0_g2_i1.path1
novel.1622	TRINITY_DN15884_c0_g2_i4.path2	TRINITY_DN10302_c0_g1_i5.path1	novel.2782
TRINITY_DN28048_c0_g1_i1.path2	novel.7371	novel.5848	novel.10459
novel.739	TRINITY_DN36731_c0_g1_i1.path1	TRINITY_DN9136_c1_g4_i1.path1	novel.5786
Pepsico1_Contig307.path1	TRINITY_DN4604_c0_g2_i1.path1	TRINITY_DN36422_c0_g1_i5.path2	TRINITY_DN7146_c0_g1_i2.path3
TRINITY_DN16114_c0_g1_i3.path1	TRINITY_DN27335_c0_g1_i1.path1	TRINITY_DN31623_c1_g1_i1.path1	TRINITY_DN16544_c0_g2_i2.path1
Pepsico2_Contig20713.path2	TRINITY_DN23521_c0_g1_i1.path2	novel.4031	TRINITY_DN19150_c0_g1_i2.path1
TRINITY_DN96412_c0_g1_i1.path1	Pepsico1_Contig3224.path1	Pepsico2_Contig748.path1	TRINITY_DN36881_c1_g1_i1.path1
Pepsico2_Contig12299.path2	TRINITY_DN10242_c0_g1_i5.path2	TRINITY_DN32288_c0_g3_i1.path1	TRINITY_DN80132_c0_g1_i1.path1
novel.8009	TRINITY_DN1019_c0_g2_i1.path2	novel.682	TRINITY_DN10280_c0_g1_i1.path1
TRINITY_DN32609_c0_g1_i2.path2	TRINITY_DN31787_c0_g1_i2.path1	Pepsico2_Contig19854.path2	TRINITY_DN3664_c0_g2_i1.path1
Pepsico2_Contig2324.path1	TRINITY_DN6290_c0_g1_i9.path1	novel.6131	novel.5636
Pepsico2_Contig12823.path2	TRINITY_DN9737_c1_g5_i2.path1	TRINITY_DN16238_c0_g1_i5.path1	TRINITY_DN11063_c0_g1_i1.path1
novel.5457	TRINITY_DN9637_c0_g1_i4.path1	novel.2234	Pepsico2_Contig20592.path1
novel.1	TRINITY_DN25120_c0_g1_i1.path1	TRINITY_DN7223_c0_g1_i5.path1	novel.1880
Pepsico2_Contig19755.path1	TRINITY_DN29095_c0_g1_i2.path1	TRINITY_DN28946_c0_g1_i2.path2	Pepsico1_Contig1106.path1
TRINITY_DN18489_c1_g1_i1.path1	Pepsico2_Contig8136.path1	TRINITY_DN3133_c1_g1_i1.path1	TRINITY_DN16495_c0_g1_i1.path2
TRINITY_DN2385_c0_g1_i1.path2	Pepsico2_Contig4693.path1	Pepsico1_Contig3373.path1	Pepsico1_Contig6934.path1
TRINITY_DN21511_c0_g1_i1.path1	TRINITY_DN2337_c0_g1_i6.path1	novel.2831	TRINITY_DN28819_c0_g1_i1.path1
TRINITY_DN28755_c0_g1_i1.path1	Pepsico2_Contig10852.path1	TRINITY_DN8304_c0_g1_i4.path1	TRINITY_DN11593_c3_g1_i1.path1
novel.2030	TRINITY_DN88385_c0_g1_i1.path1	Pepsico2_Contig6534.path1	Pepsico2_Contig6569.path1
novel.414	novel.2760	novel.769	novel.2074
TRINITY_DN15407_c0_g1_i3.path1	novel.1849	novel.3119	Pepsico2_Contig12822.path1
TRINITY_DN2852_c0_g1_i3.path2	TRINITY_DN61215_c0_g1_i1.path1	TRINITY_DN7630_c0_g1_i1.path3	TRINITY_DN8820_c0_g1_i1.path1
Pepsico2_Contig15323.path1	TRINITY_DN21996_c0_g1_i1.path1	TRINITY_DN21918_c0_g1_i3.path1	TRINITY_DN24554_c0_g1_i1.path1
novel.1476	TRINITY_DN15885_c0_g1_i1.path1	novel.1615	TRINITY_DN17301_c0_g1_i1.path1
TRINITY_DN3886_c0_g1_i7.path2	Pepsico2_Contig6237.path1	TRINITY_DN10280_c0_g1_i1.path1	novel.3524
TRINITY_DN11593_c1_g1_i7.path2	TRINITY_DN6979_c0_g1_i6.path1	TRINITY_DN16522_c0_g1_i3.path2	Pepsico1_Contig32727.path2
Pepsico2_Contig13013.path1	TRINITY_DN48822_c0_g1_i2.path1	TRINITY_DN685_c1_g2_i1.path2	novel.8600
novel.3767	novel.5849	TRINITY_DN12639_c0_g1_i6.path1	TRINITY_DN3153_c0_g3_i2.path1
TRINITY_DN2455_c1_g1_i5.path1	TRINITY_DN5602_c0_g1_i1.path1	TRINITY_DN29271_c0_g1_i2.path3	novel.5395
TRINITY_DN2173_c0_g1_i1.path1	TRINITY_DN14489_c0_g1_i1.path1	TRINITY_DN80132_c0_g1_i1.path1	TRINITY_DN24498_c0_g1_i2.path1
Pepsico2_Contig19393.path1	novel.9624	Pepsico2_Contig971.path1	novel.10371
novel.848	novel.8506	TRINITY_DN2854_c0_g1_i1.path1	novel.2117
TRINITY_DN4887_c0_g1_i6.path1	TRINITY_DN8283_c0_g1_i1.path2	TRINITY_DN34243_c1_g1_i1.path1	TRINITY_DN5939_c0_g3_i1.path1
novel.9088	novel.10545	Pepsico2_Contig11928.path1	Pepsico1_Contig2049.path1
TRINITY_DN49172_c0_g1_i1.path1	TRINITY_DN18616_c0_g1_i4.path1	novel.9752	Pepsico2_Contig10146.path1
novel.8361	TRINITY_DN6929_c1_g1_i4.path1	novel.7642	TRINITY_DN34723_c0_g1_i1.path3
novel.9162	novel.1529	TRINITY_DN18179_c0_g2_i1.path2	novel.1050
TRINITY_DN34252_c0_g1_i1.path1	TRINITY_DN13917_c0_g1_i1.path1	novel.9574	novel.8002
Pepsico2_Contig9521.path1	novel.1840	novel.3116	novel.1431
novel.4758	Pepsico2_Contig11928.path1	Pepsico1_Contig2386.path1	TRINITY_DN38115_c0_g1_i1.path1
TRINITY_DN3027_c0_g1_i4.path1	TRINITY_DN22120_c0_g1_i4.path1	TRINITY_DN6488_c0_g1_i1.path3	novel.9447
novel.6171	TRINITY_DN32288_c0_g3_i1.path1	Pepsico1_Contig1806.path2	TRINITY_DN39623_c0_g1_i1.path2
TRINITY_DN1621_c0_g2_i4.path1	TRINITY_DN9779_c1_g1_i1.path1	novel.9685	TRINITY_DN31456_c0_g2_i4.path3
TRINITY_DN90340_c0_g1_i1.path1	Pepsico2_Contig16657.path3	TRINITY_DN58751_c0_g1_i1.path1	Pepsico2_Contig8488.path1
TRINITY_DN82356_c0_g1_i1.path1	novel.4361	TRINITY_DN17959_c1_g1_i1.path1	TRINITY_DN112669_c0_g1_i1.path1
novel.6524	TRINITY_DN94140_c0_g1_i1.path2	TRINITY_DN3153_c0_g3_i2.path1	TRINITY_DN4474_c1_g2_i1.path1
TRINITY_DN100271_c0_g1_i1.path1	TRINITY_DN69448_c0_g1_i1.path1	Pepsico2_Contig12826.path1	novel.4764
Pepsico1_Contig686.path1	novel.7949	Pepsico2_Contig10815.path1	TRINITY_DN51712_c0_g1_i1.path1
TRINITY_DN40344_c0_g1_i1.path1	novel.7060	Pepsico1_Contig34820.path1	TRINITY_DN11768_c0_g1_i1.path1
TRINITY_DN17321_c0_g1_i4.path2	TRINITY_DN11717_c0_g2_i2.path1	TRINITY_DN17296_c0_g1_i2.path2	Pepsico2_Contig17058.path1
TRINITY_DN28511_c0_g1_i5.path1	Pepsico1_Contig1793.path1	novel.1974	Pepsico1_Contig37214.path1
Pepsico1_Contig1896.path1	TRINITY_DN36422_c0_g1_i5.path2	TRINITY_DN34811_c1_g1_i1.path1	TRINITY_DN49793_c0_g1_i6.path1
TRINITY_DN2450_c1_g2_i1.path1	TRINITY_DN26281_c0_g2_i1.path1	Pepsico2_Contig4961.path1	Pepsico1_Contig35904.path3
Pepsico2_Contig6486.path1	novel.616	TRINITY_DN95487_c0_g1_i1.path1	Pepsico1_Contig2723.path1
novel.3716	novel.3782	Pepsico1_Contig3082.path1	TRINITY_DN42311_c0_g2_i1.path1
TRINITY_DN25492_c0_g1_i1.path1	novel.4372	TRINITY_DN10467_c0_g1_i3.path1	Pepsico2_Contig9966.path1
Pepsico2_Contig21198.path1	TRINITY_DN22219_c0_g1_i1.path2	novel.6260	TRINITY_DN10932_c1_g1_i1.path1
TRINITY_DN3623_c1_g2_i3.path1	novel.9809	TRINITY_DN55806_c0_g1_i1.path1	TRINITY_DN16421_c0_g1_i9.path1
Pepsico2_Contig20713.path1	novel.503	TRINITY_DN42311_c0_g2_i1.path1	novel.9846
TRINITY_DN36833_c1_g1_i1.path1	Pepsico2_Contig783.path1	TRINITY_DN25461_c0_g1_i1.path1	TRINITY_DN966_c0_g2_i3.path1
TRINITY_DN39236_c0_g1_i1.path1	TRINITY_DN14061_c0_g3_i2.path1	TRINITY_DN6678_c0_g2_i1.path1	TRINITY_DN11450_c3_g1_i1.path1
TRINITY_DN14594_c0_g2_i1.path1	TRINITY_DN13858_c0_g1_i1.path1	TRINITY_DN66631_c0_g1_i1.path1	Pepsico1_Contig1880.path1
novel.8801	TRINITY_DN10242_c0_g1_i5.path1	TRINITY_DN26281_c0_g2_i1.path1	novel.1155
Pepsico2_Contig19554.path1	novel.9764	Pepsico2_Contig17052.path2	TRINITY_DN4477_c0_g1_i1.path1
Pepsico2_Contig17537.path1	TRINITY_DN15645_c1_g2_i1.path1	TRINITY_DN18292_c0_g3_i1.path1	TRINITY_DN17766_c0_g1_i1.path1
novel.9193	Pepsico2_Contig13783.path1	TRINITY_DN20401_c0_g2_i1.path1	TRINITY_DN20815_c0_g2_i1.path1
TRINITY_DN20890_c0_g1_i1.path1	TRINITY_DN45866_c0_g1_i1.path1	TRINITY_DN4576_c0_g1_i2.path1	TRINITY_DN1122_c0_g2_i1.path1
TRINITY_DN1568_c0_g1_i3.path1	TRINITY_DN2526_c0_g1_i8.path2	TRINITY_DN9779_c1_g1_i1.path1	TRINITY_DN31978_c0_g1_i1.path3
TRINITY_DN6290_c0_g1_i9.path1	Pepsico2_Contig9507.path1	Pepsico2_Contig4693.path1	Pepsico2_Contig3611.path1
novel.6536	Pepsico2_Contig6611.path2	TRINITY_DN9952_c0_g3_i1.path1	TRINITY_DN24358_c0_g1_i5.path1
TRINITY_DN21918_c0_g1_i3.path1	novel.5033	novel.9181	Pepsico2_Contig583.path1
novel.7396	Pepsico1_Contig1891.path1	novel.2313	novel.3826
Pepsico1_Contig2408.path1	TRINITY_DN2185_c0_g1_i8.path1	TRINITY_DN7653_c0_g2_i2.path1	TRINITY_DN17783_c0_g1_i3.path1
novel.6379	Pepsico1_Contig2094.path1	TRINITY_DN29620_c0_g2_i1.path1	TRINITY_DN23140_c0_g1_i1.path1
novel.294	TRINITY_DN34766_c0_g1_i6.path1	Pepsico2_Contig20350.path1	TRINITY_DN6300_c0_g1_i3.path1
Pepsico2_Contig6636.path1	Pepsico2_Contig16985.path1	TRINITY_DN7795_c0_g1_i6.path1	TRINITY_DN27890_c0_g1_i1.path1
TRINITY_DN8832_c1_g1_i2.path1	novel.9092	novel.5177	novel.10016
Pepsico2_Contig12329.path1	Pepsico1_Contig6915.path1	TRINITY_DN14202_c0_g3_i2.path1	TRINITY_DN14202_c3_g1_i1.path1
Pepsico2_Contig13724.path1	TRINITY_DN14191_c0_g1_i1.path2	TRINITY_DN8820_c0_g1_i1.path1	TRINITY_DN8648_c0_g1_i4.path2
Pepsico2_Contig7831.path1	Pepsico1_Contig819.path1	TRINITY_DN826_c0_g1_i8.path2	Pepsico2_Contig8440.path1
TRINITY_DN37002_c0_g1_i1.path1	TRINITY_DN22584_c1_g1_i1.path1	TRINITY_DN10301_c1_g1_i3.path1	Pepsico2_Contig783.path1
novel.1344	novel.1213	TRINITY_DN20252_c0_g1_i1.path1	TRINITY_DN4150_c1_g1_i1.path1
TRINITY_DN26672_c1_g2_i2.path1	TRINITY_DN6550_c0_g1_i1.path3	TRINITY_DN5449_c0_g2_i1.path1	TRINITY_DN49479_c0_g1_i1.path1
TRINITY_DN16929_c1_g1_i4.path1	Pepsico2_Contig6397.path1	TRINITY_DN33800_c0_g1_i2.path2	Pepsico2_Contig6405.path1
TRINITY_DN35314_c0_g1_i3.path1	TRINITY_DN43817_c0_g1_i1.path1	TRINITY_DN16977_c0_g2_i1.path1	TRINITY_DN17296_c0_g1_i2.path2
TRINITY_DN4812_c0_g1_i1.path1	Pepsico2_Contig1496.path1	TRINITY_DN3161_c0_g1_i1.path2	TRINITY_DN3635_c0_g1_i2.path1
Pepsico2_Contig14707.path1	novel.1050	TRINITY_DN85435_c0_g1_i1.path1	novel.2023
Pepsico2_Contig16657.path3	TRINITY_DN52891_c0_g1_i1.path1	TRINITY_DN16614_c0_g2_i1.path1	TRINITY_DN6390_c0_g1_i3.path1
TRINITY_DN3360_c0_g1_i5.path1	TRINITY_DN9377_c0_g1_i1.path1	TRINITY_DN1019_c0_g2_i1.path2	TRINITY_DN28154_c0_g1_i4.path1
Pepsico2_Contig16749.path1	TRINITY_DN5321_c0_g1_i10.path1	novel.7166	TRINITY_DN9952_c0_g3_i1.path1
TRINITY_DN22959_c0_g1_i1.path2	TRINITY_DN28511_c0_g1_i5.path1	novel.3460	novel.2946
TRINITY_DN40602_c0_g1_i1.path1	TRINITY_DN9421_c0_g2_i6.path1	TRINITY_DN28930_c0_g2_i2.path1	Pepsico2_Contig19271.path1
novel.6126	TRINITY_DN10806_c1_g2_i8.path1	novel.877	TRINITY_DN8445_c0_g2_i1.path1
TRINITY_DN2871_c0_g2_i1.path2	novel.1609	Pepsico1_Contig421.path1	TRINITY_DN17962_c1_g1_i1.path2
TRINITY_DN14163_c0_g1_i2.path1	TRINITY_DN88632_c0_g1_i1.path1	TRINITY_DN49805_c0_g1_i1.path2	TRINITY_DN15185_c0_g3_i5.path1
novel.9582	TRINITY_DN49656_c0_g1_i1.path3	TRINITY_DN20966_c0_g3_i1.path1	TRINITY_DN18829_c1_g1_i1.path2
Pepsico1_Contig771.path1	Pepsico1_Contig195.path1	novel.1340	novel.8536
TRINITY_DN1788_c0_g1_i2.path1	Pepsico1_Contig37214.path1	novel.4631	Pepsico1_Contig29103.path2
TRINITY_DN27712_c0_g1_i1.path1	TRINITY_DN17076_c0_g2_i1.path1	Pepsico2_Contig19859.path1	novel.7498
TRINITY_DN3731_c0_g2_i1.path1	TRINITY_DN18437_c0_g1_i2.path1	TRINITY_DN42400_c4_g1_i1.path1	TRINITY_DN11938_c0_g1_i1.path1
Pepsico2_Contig19525.path2	TRINITY_DN4108_c0_g3_i1.path1	novel.8682	Pepsico2_Contig11928.path1
TRINITY_DN27247_c0_g1_i1.path1	TRINITY_DN49172_c0_g1_i1.path1	novel.4978	Pepsico2_Contig12261.path1
novel.3708	Pepsico2_Contig10102.path2	TRINITY_DN7691_c1_g2_i1.path1	TRINITY_DN37339_c0_g1_i2.path1
TRINITY_DN8315_c0_g1_i2.path1	novel.4061	TRINITY_DN89_c0_g1_i9.path1	TRINITY_DN10806_c1_g2_i8.path1
novel.7060	TRINITY_DN4515_c0_g1_i17.path1	Pepsico1_Contig2089.path1	TRINITY_DN5970_c2_g1_i1.path1
TRINITY_DN40297_c1_g1_i1.path1	TRINITY_DN685_c1_g2_i1.path2	TRINITY_DN10738_c0_g2_i1.path1	Pepsico2_Contig20349.path1
TRINITY_DN15645_c1_g2_i1.path1	TRINITY_DN7412_c0_g1_i1.path1	Pepsico2_Contig12716.path1	Pepsico1_Contig4130.path1
Pepsico2_Contig851.path1	TRINITY_DN25489_c0_g1_i1.path1	novel.3889	TRINITY_DN9136_c1_g4_i1.path1
TRINITY_DN51163_c0_g1_i1.path1	Pepsico2_Contig5071.path1	TRINITY_DN43500_c0_g1_i1.path1	Pepsico1_Contig636.path1
TRINITY_DN28825_c0_g1_i3.path1	Pepsico1_Contig6747.path1	Pepsico2_Contig6897.path1	TRINITY_DN109491_c0_g1_i1.path1
TRINITY_DN1634_c0_g1_i5.path1	TRINITY_DN11175_c0_g2_i1.path1	TRINITY_DN1695_c0_g2_i7.path2	TRINITY_DN23077_c0_g2_i1.path2
TRINITY_DN10738_c0_g1_i1.path1	TRINITY_DN2554_c0_g1_i11.path2	novel.9624	Pepsico2_Contig7773.path1
Pepsico1_Contig3210.path1	novel.1561	Pepsico2_Contig10146.path1	novel.899
Pepsico1_Contig6507.path1	TRINITY_DN7830_c0_g2_i1.path1	TRINITY_DN20837_c0_g1_i1.path2	TRINITY_DN11785_c1_g1_i1.path1
Pepsico2_Contig5930.path1	TRINITY_DN12466_c0_g1_i5.path1	Pepsico2_Contig9040.path1	novel.1616
TRINITY_DN1950_c0_g1_i1.path2	TRINITY_DN25751_c0_g1_i2.path1	novel.5786	novel.2457
Pepsico1_Contig16088.path2	TRINITY_DN10325_c0_g2_i1.path1	TRINITY_DN32381_c0_g1_i1.path1	novel.7165
TRINITY_DN33691_c0_g1_i1.path2	Pepsico1_Contig2633.path1	TRINITY_DN19578_c0_g2_i1.path1	TRINITY_DN10932_c1_g2_i2.path1
TRINITY_DN33691_c0_g1_i1.path1	TRINITY_DN2210_c0_g1_i2.path1	Pepsico2_Contig7773.path1	Pepsico1_Contig32296.path2
Pepsico2_Contig14783.path1	TRINITY_DN5076_c0_g1_i5.path1	TRINITY_DN94969_c0_g1_i1.path1	TRINITY_DN28145_c0_g2_i3.path1
TRINITY_DN41217_c0_g1_i1.path1	TRINITY_DN15695_c0_g1_i3.path1	Pepsico1_Contig37083.path1	novel.3461
novel.9156	novel.9817	TRINITY_DN26560_c0_g2_i1.path1	TRINITY_DN11282_c1_g2_i1.path1
TRINITY_DN8089_c0_g1_i3.path1	TRINITY_DN17321_c0_g1_i4.path2	Pepsico2_Contig19397.path1	Pepsico2_Contig12666.path1
novel.5925	TRINITY_DN25461_c0_g1_i1.path1	TRINITY_DN12913_c0_g1_i2.path1	TRINITY_DN6441_c0_g1_i2.path2
TRINITY_DN1457_c0_g2_i3.path1	TRINITY_DN19092_c0_g2_i1.path1	Pepsico1_Contig2079.path1	TRINITY_DN20966_c0_g3_i1.path1
TRINITY_DN19760_c0_g1_i2.path1	novel.682	novel.8801	novel.8711
Pepsico2_Contig19818.path1	Pepsico2_Contig589.path2	novel.7521	TRINITY_DN14904_c0_g1_i1.path1
TRINITY_DN6137_c0_g1_i1.path1	TRINITY_DN10286_c0_g1_i2.path1	TRINITY_DN13917_c0_g1_i1.path1	TRINITY_DN9899_c0_g1_i1.path2
Pepsico2_Contig3722.path1	Pepsico2_Contig19670.path1	TRINITY_DN4474_c1_g2_i1.path1	Pepsico2_Contig8620.path1
novel.7111	TRINITY_DN52537_c0_g1_i1.path1	novel.1529	TRINITY_DN95487_c0_g1_i1.path1
novel.2513	novel.1344	novel.1213	novel.8861
TRINITY_DN85794_c0_g1_i1.path1	Pepsico2_Contig2050.path1	Pepsico1_Contig5048.path1	Pepsico2_Contig1759.path1
TRINITY_DN101355_c0_g1_i1.path1	novel.1033	TRINITY_DN9612_c0_g1_i1.path2	TRINITY_DN9377_c0_g1_i1.path1
TRINITY_DN40225_c0_g1_i1.path2	novel.9464	novel.6885	novel.1340
TRINITY_DN12408_c2_g1_i1.path1	TRINITY_DN42615_c0_g1_i3.path1	Pepsico1_Contig1252.path1	novel.5862
Pepsico1_Contig395.path1	TRINITY_DN21918_c0_g1_i3.path1	TRINITY_DN10796_c0_g1_i1.path1	Pepsico1_Contig421.path1
TRINITY_DN20585_c0_g1_i1.path1	TRINITY_DN27832_c0_g1_i1.path1	Pepsico2_Contig3611.path1	TRINITY_DN21318_c0_g1_i1.path1
TRINITY_DN56173_c0_g1_i1.path1	Pepsico1_Contig1806.path2	TRINITY_DN23077_c0_g2_i1.path1	TRINITY_DN26427_c0_g1_i1.path1
TRINITY_DN20543_c0_g1_i1.path1	novel.2117	novel.2582	Pepsico2_Contig17139.path1
TRINITY_DN71311_c0_g1_i1.path1	TRINITY_DN17775_c0_g2_i1.path1	Pepsico2_Contig3282.path2	TRINITY_DN102365_c0_g1_i1.path1
TRINITY_DN61361_c0_g1_i1.path1	Pepsico1_Contig7138.path1	novel.5395	TRINITY_DN25442_c0_g1_i1.path1
TRINITY_DN11985_c0_g1_i1.path1	Pepsico2_Contig12826.path1	TRINITY_DN5931_c0_g1_i7.path1	novel.1615
TRINITY_DN670_c0_g1_i1.path2	Pepsico2_Contig15286.path1	Pepsico2_Contig27.path1	TRINITY_DN21253_c0_g5_i1.path1
novel.5930	novel.5869	TRINITY_DN4437_c0_g1_i2.path2	TRINITY_DN12406_c0_g1_i3.path2
novel.6828	TRINITY_DN28504_c0_g2_i3.path1	Pepsico1_Contig688.path1	TRINITY_DN87534_c0_g1_i1.path1
novel.9817	TRINITY_DN24524_c0_g1_i2.path1	novel.1622	TRINITY_DN38775_c0_g1_i1.path1
TRINITY_DN18292_c0_g3_i1.path1	Pepsico2_Contig17968.path1	TRINITY_DN13705_c0_g3_i1.path2	TRINITY_DN16298_c0_g2_i1.path1
TRINITY_DN14594_c0_g1_i1.path2	Pepsico1_Contig1102.path1	Pepsico1_Contig1287.path1	TRINITY_DN20167_c1_g1_i1.path1
TRINITY_DN22584_c0_g2_i1.path1	novel.5362	TRINITY_DN32584_c0_g1_i1.path1	TRINITY_DN25012_c0_g2_i2.path1
Pepsico2_Contig10148.path1	Pepsico2_Contig13035.path1	TRINITY_DN31147_c0_g1_i1.path1	TRINITY_DN9030_c0_g4_i1.path1
TRINITY_DN17279_c0_g1_i1.path1	Pepsico1_Contig6644.path1	Pepsico1_Contig171.path1	TRINITY_DN8929_c0_g1_i2.path1
Pepsico2_Contig19859.path1	Pepsico1_Contig1393.path1	TRINITY_DN3271_c0_g1_i4.path3	novel.6995
TRINITY_DN97533_c0_g1_i1.path1	Pepsico1_Contig1064.path1	TRINITY_DN308_c0_g1_i1.path1	novel.2086
TRINITY_DN5227_c0_g1_i1.path1	TRINITY_DN16260_c0_g2_i1.path1	Pepsico2_Contig12308.path2	TRINITY_DN7966_c1_g1_i1.path1
Pepsico2_Contig8905.path1	Pepsico1_Contig1287.path1	TRINITY_DN5355_c1_g1_i3.path1	Pepsico2_Contig7195.path2
Pepsico1_Contig47.path1	Pepsico2_Contig17023.path1	TRINITY_DN9377_c0_g1_i1.path1	Pepsico2_Contig10642.path2
TRINITY_DN11115_c0_g2_i1.path1	TRINITY_DN2173_c0_g1_i1.path1	Pepsico2_Contig19393.path1	Pepsico2_Contig5229.path2
TRINITY_DN33568_c0_g5_i1.path1	TRINITY_DN21607_c0_g3_i3.path1	novel.8861	TRINITY_DN10286_c0_g1_i2.path1
TRINITY_DN7127_c0_g2_i6.path1	Pepsico2_Contig1298.path1	Pepsico2_Contig15364.path1	novel.4671
novel.1959	TRINITY_DN26408_c0_g1_i1.path1	TRINITY_DN2450_c1_g2_i1.path1	TRINITY_DN78535_c0_g1_i1.path1
TRINITY_DN66659_c0_g1_i1.path1	TRINITY_DN16937_c0_g1_i1.path2	novel.6927	TRINITY_DN10467_c0_g1_i3.path1
Pepsico2_Contig8462.path1	novel.380	Pepsico1_Contig32296.path2	TRINITY_DN90340_c0_g1_i1.path1
Pepsico2_Contig19690.path1	Pepsico1_Contig4901.path1	TRINITY_DN10806_c1_g2_i8.path1	TRINITY_DN7209_c0_g1_i10.path1
TRINITY_DN78688_c0_g1_i1.path1	TRINITY_DN19732_c1_g1_i2.path1	TRINITY_DN2188_c0_g1_i5.path1	novel.6293
TRINITY_DN28959_c0_g1_i1.path1	TRINITY_DN14877_c0_g1_i2.path1	Pepsico2_Contig17537.path1	TRINITY_DN3070_c1_g1_i2.path1
novel.2029	Pepsico2_Contig17149.path2	TRINITY_DN35_c0_g2_i1.path1	TRINITY_DN1695_c0_g2_i7.path2
TRINITY_DN15239_c0_g1_i10.path1	Pepsico1_Contig1896.path1	TRINITY_DN14383_c0_g2_i2.path1	TRINITY_DN73578_c0_g1_i1.path1
Pepsico2_Contig2625.path1	TRINITY_DN33625_c0_g1_i1.path2	TRINITY_DN103372_c0_g1_i1.path1	TRINITY_DN108802_c0_g1_i1.path1
Pepsico1_Contig6573.path1	TRINITY_DN107312_c0_g1_i1.path1	TRINITY_DN15475_c0_g1_i1.path1	TRINITY_DN25496_c0_g1_i2.path1
TRINITY_DN6929_c1_g1_i4.path1	Pepsico1_Contig1271.path1	TRINITY_DN27969_c0_g2_i1.path1	Pepsico2_Contig4567.path1
TRINITY_DN17710_c0_g1_i1.path1	Pepsico1_Contig552.path1	TRINITY_DN582_c2_g1_i6.path3	TRINITY_DN15272_c1_g1_i1.path2
Pepsico2_Contig4084.path1	novel.7783	TRINITY_DN1803_c3_g1_i1.path1	TRINITY_DN16801_c1_g3_i1.path1
TRINITY_DN16507_c0_g1_i2.path1	TRINITY_DN18524_c0_g1_i1.path1	TRINITY_DN78535_c0_g1_i1.path1	Pepsico1_Contig33380.path1
Pepsico2_Contig3010.path1	TRINITY_DN2145_c0_g1_i1.path1	Pepsico1_Contig1034.path1	TRINITY_DN59511_c0_g1_i1.path1
TRINITY_DN38367_c0_g1_i1.path1	TRINITY_DN18179_c0_g2_i1.path2	TRINITY_DN20165_c0_g1_i1.path1	TRINITY_DN39623_c0_g1_i1.path1
TRINITY_DN39038_c0_g1_i1.path1	TRINITY_DN5876_c1_g1_i1.path1	novel.3360	novel.9752
novel.3405	Pepsico1_Contig34820.path1	TRINITY_DN7691_c0_g1_i1.path1	TRINITY_DN24525_c0_g1_i1.path1
TRINITY_DN16825_c0_g1_i7.path1	TRINITY_DN931_c0_g2_i2.path1	TRINITY_DN92652_c0_g1_i1.path1	Pepsico1_Contig6523.path1
Pepsico1_Contig1029.path1	TRINITY_DN44454_c0_g1_i1.path2	Pepsico2_Contig7656.path1	TRINITY_DN9392_c0_g1_i5.path1
Pepsico2_Contig4726.path1	novel.7396	TRINITY_DN54627_c0_g1_i1.path1	novel.4236
TRINITY_DN7816_c0_g1_i1.path2	TRINITY_DN11760_c0_g1_i2.path1	TRINITY_DN24042_c0_g1_i2.path1	Pepsico2_Contig12692.path4
TRINITY_DN4781_c2_g1_i5.path1	TRINITY_DN15577_c0_g1_i4.path2	Pepsico2_Contig13889.path2	TRINITY_DN15695_c0_g1_i3.path1
Pepsico2_Contig8389.path2	TRINITY_DN5816_c0_g1_i8.path1	TRINITY_DN21405_c1_g1_i7.path1	TRINITY_DN18480_c0_g1_i4.path1
TRINITY_DN16663_c1_g1_i1.path2	TRINITY_DN11017_c0_g2_i4.path3	TRINITY_DN25287_c0_g3_i1.path1	novel.6786
TRINITY_DN77675_c0_g1_i1.path2	TRINITY_DN33625_c0_g1_i1.path1	TRINITY_DN22549_c0_g2_i1.path1	TRINITY_DN2210_c0_g2_i3.path1
Pepsico2_Contig1842.path1	TRINITY_DN12951_c0_g1_i1.path1	TRINITY_DN60652_c0_g1_i1.path1	Pepsico2_Contig9483.path2
TRINITY_DN9712_c0_g3_i2.path1	TRINITY_DN12947_c0_g1_i4.path1	Pepsico1_Contig2142.path1	Pepsico1_Contig36864.path1
TRINITY_DN26268_c0_g2_i2.path1	Pepsico1_Contig2142.path1	Pepsico1_Contig106.path1	TRINITY_DN2188_c0_g1_i5.path1
TRINITY_DN25396_c0_g3_i1.path2	novel.8351	TRINITY_DN19732_c1_g1_i2.path1	TRINITY_DN22897_c0_g1_i1.path2
TRINITY_DN2852_c0_g1_i3.path1	Pepsico2_Contig3142.path1	TRINITY_DN15185_c0_g3_i5.path1	novel.5801
Pepsico2_Contig6534.path1	novel.2030	novel.9211	Pepsico1_Contig4382.path1
novel.3581	Pepsico2_Contig2494.path1	TRINITY_DN5_c0_g1_i1.path1	TRINITY_DN11041_c0_g2_i1.path1
novel.8035	novel.9825	TRINITY_DN2354_c0_g1_i4.path2	TRINITY_DN35314_c0_g1_i3.path1
TRINITY_DN10547_c0_g1_i17.path1	TRINITY_DN4640_c0_g2_i1.path1	Pepsico2_Contig31.path1	TRINITY_DN22363_c1_g1_i2.path1
TRINITY_DN13350_c0_g1_i1.path1	Pepsico2_Contig5887.path1	TRINITY_DN7816_c0_g1_i1.path2	novel.2274
TRINITY_DN31534_c0_g1_i1.path1	novel.7569	TRINITY_DN51712_c0_g1_i1.path1	Pepsico2_Contig13709.path1
novel.2946	novel.8801	TRINITY_DN12947_c0_g1_i4.path1	novel.6941
Pepsico1_Contig6449.path1	novel.3141	TRINITY_DN29096_c0_g1_i9.path1	TRINITY_DN9582_c0_g1_i1.path1
Pepsico1_Contig224.path1	Pepsico2_Contig12412.path1	novel.8008	novel.8191
Pepsico2_Contig14675.path1	Pepsico1_Contig133.path1	novel.2798	Pepsico1_Contig4097.path1
Pepsico2_Contig19397.path1	TRINITY_DN1581_c0_g1_i3.path2	TRINITY_DN44861_c0_g1_i1.path1	novel.1956
TRINITY_DN5220_c0_g1_i1.path1	TRINITY_DN11181_c0_g1_i3.path1	Pepsico1_Contig2546.path3	novel.9723
novel.7193	TRINITY_DN20769_c0_g1_i1.path2	novel.5849	TRINITY_DN4640_c0_g2_i1.path1
TRINITY_DN27013_c2_g1_i1.path1	TRINITY_DN60938_c0_g1_i1.path1	TRINITY_DN32774_c0_g1_i1.path2	TRINITY_DN475_c0_g1_i14.path1
TRINITY_DN15602_c0_g1_i1.path1	Pepsico2_Contig9786.path1	TRINITY_DN40354_c0_g1_i2.path1	TRINITY_DN3180_c0_g2_i1.path2
novel.8131	TRINITY_DN4504_c1_g2_i1.path1	TRINITY_DN59616_c0_g1_i1.path1	novel.3547
TRINITY_DN112662_c0_g1_i1.path1	Pepsico2_Contig4698.path1	Pepsico1_Contig35904.path3	TRINITY_DN10782_c0_g1_i1.path1
TRINITY_DN97596_c0_g1_i2.path1	Pepsico2_Contig14494.path1	TRINITY_DN20994_c0_g1_i1.path2	TRINITY_DN15788_c0_g1_i1.path1
TRINITY_DN16495_c0_g1_i1.path2	TRINITY_DN3106_c1_g1_i1.path1	TRINITY_DN618_c0_g1_i2.path1	Pepsico2_Contig9165.path2
novel.10131	Pepsico2_Contig16029.path1	TRINITY_DN18610_c0_g2_i1.path1	novel.335
TRINITY_DN1859_c0_g1_i13.path1	TRINITY_DN13249_c0_g2_i1.path1	TRINITY_DN96972_c0_g1_i1.path1	Pepsico2_Contig19854.path1
TRINITY_DN35583_c0_g1_i4.path1	TRINITY_DN18372_c0_g1_i1.path2	TRINITY_DN8132_c0_g1_i1.path1	novel.877
novel.10545	TRINITY_DN10178_c0_g2_i5.path1	TRINITY_DN49793_c0_g1_i6.path1	Pepsico1_Contig28749.path1
Pepsico2_Contig14140.path1	TRINITY_DN10295_c0_g2_i1.path1	TRINITY_DN1331_c0_g2_i1.path1	novel.6260
TRINITY_DN17530_c0_g1_i1.path3	TRINITY_DN30131_c0_g1_i2.path1	TRINITY_DN10118_c0_g1_i2.path1	TRINITY_DN55806_c0_g1_i1.path1
TRINITY_DN29061_c0_g1_i1.path1	Pepsico2_Contig17794.path1	TRINITY_DN9421_c0_g2_i6.path1	Pepsico2_Contig1781.path1
novel.4113	TRINITY_DN4027_c0_g5_i1.path1	TRINITY_DN19086_c0_g1_i2.path1	TRINITY_DN10152_c0_g1_i7.path1
TRINITY_DN10134_c0_g1_i1.path1	TRINITY_DN7653_c0_g2_i2.path1	Pepsico2_Contig17216.path1	TRINITY_DN7653_c0_g2_i2.path1
TRINITY_DN47640_c0_g1_i1.path1	TRINITY_DN21931_c0_g1_i2.path1	TRINITY_DN13254_c1_g1_i1.path1	novel.5932
TRINITY_DN3075_c1_g1_i2.path2	TRINITY_DN101169_c0_g1_i1.path1	Pepsico2_Contig15152.path1	TRINITY_DN24347_c0_g1_i2.path1
TRINITY_DN16298_c0_g2_i1.path1	TRINITY_DN15524_c0_g1_i1.path1	TRINITY_DN555_c0_g1_i2.path1	TRINITY_DN43500_c0_g1_i1.path1
TRINITY_DN64549_c0_g1_i1.path1	TRINITY_DN16986_c0_g2_i2.path1	Pepsico2_Contig638.path2	novel.6861
TRINITY_DN97486_c0_g1_i1.path2	novel.4121	TRINITY_DN22881_c0_g1_i4.path2	TRINITY_DN47813_c0_g1_i1.path1
TRINITY_DN1945_c0_g1_i3.path1	Pepsico1_Contig4033.path2	TRINITY_DN29528_c0_g1_i1.path1	TRINITY_DN25461_c0_g1_i1.path2
novel.5362	Pepsico1_Contig252.path1	TRINITY_DN14012_c0_g1_i1.path2	novel.7052
Pepsico2_Contig6237.path2	Pepsico2_Contig12299.path1	TRINITY_DN11593_c1_g2_i1.path1	TRINITY_DN628_c0_g2_i3.path1
TRINITY_DN36977_c1_g1_i1.path1	novel.742	TRINITY_DN45971_c0_g1_i3.path1	Pepsico2_Contig12177.path2
novel.1917	Pepsico2_Contig12155.path1	novel.6029	TRINITY_DN20545_c0_g2_i1.path1
Pepsico2_Contig17090.path2	novel.4936	novel.5461	novel.4538
Pepsico1_Contig2029.path1	TRINITY_DN32587_c0_g1_i1.path1	novel.3524	Pepsico1_Contig1795.path1
TRINITY_DN11128_c0_g1_i8.path1	TRINITY_DN20292_c1_g1_i1.path1	novel.7067	novel.94
TRINITY_DN16986_c0_g2_i2.path1	Pepsico2_Contig1781.path1	TRINITY_DN34417_c0_g2_i1.path1	TRINITY_DN28129_c0_g1_i1.path1
TRINITY_DN12913_c0_g1_i2.path2	TRINITY_DN10738_c0_g2_i1.path1	TRINITY_DN2526_c0_g1_i8.path2	TRINITY_DN28048_c0_g1_i1.path2
Pepsico2_Contig10688.path1	TRINITY_DN32381_c0_g1_i1.path1	Pepsico2_Contig651.path2	TRINITY_DN44023_c0_g1_i4.path1
novel.4121	TRINITY_DN4225_c0_g1_i11.path1	novel.8580	TRINITY_DN28946_c0_g1_i2.path1
TRINITY_DN11558_c0_g1_i1.path1	Pepsico1_Contig337.path1	TRINITY_DN8445_c0_g1_i4.path2	TRINITY_DN3271_c0_g1_i4.path3
Pepsico1_Contig2029.path2	TRINITY_DN16228_c0_g1_i5.path1	novel.1448	Pepsico2_Contig16821.path1
Pepsico2_Contig15286.path1	TRINITY_DN29788_c0_g1_i1.path1	TRINITY_DN44751_c0_g1_i1.path1	TRINITY_DN106836_c0_g1_i1.path1
TRINITY_DN112768_c0_g1_i1.path1	TRINITY_DN33047_c0_g3_i1.path1	Pepsico2_Contig1967.path1	TRINITY_DN44824_c0_g1_i1.path5
TRINITY_DN5977_c0_g1_i1.path1	Pepsico2_Contig12739.path1	novel.994	TRINITY_DN8132_c0_g1_i1.path1
Pepsico2_Contig12172.path1	Pepsico2_Contig20608.path1	TRINITY_DN20691_c0_g2_i1.path2	novel.5177
Pepsico1_Contig533.path1	TRINITY_DN11525_c0_g1_i21.path1	novel.1757	TRINITY_DN18185_c0_g1_i6.path1
TRINITY_DN49805_c0_g1_i1.path2	TRINITY_DN19368_c0_g1_i7.path1	TRINITY_DN24498_c0_g1_i2.path1	TRINITY_DN19086_c0_g1_i2.path1
TRINITY_DN16073_c0_g1_i2.path2	TRINITY_DN11509_c0_g1_i7.path1	TRINITY_DN8291_c1_g3_i8.path1	TRINITY_DN11478_c0_g1_i4.path2
TRINITY_DN26045_c0_g1_i4.path1	Pepsico2_Contig550.path1	Pepsico2_Contig7277.path2	Pepsico1_Contig6644.path1
novel.3437	novel.5248	TRINITY_DN11076_c0_g1_i1.path2	novel.7701
novel.8883	Pepsico1_Contig31958.path1	TRINITY_DN2753_c0_g1_i1.path1	Pepsico2_Contig8389.path1
TRINITY_DN91049_c0_g1_i1.path2	TRINITY_DN18491_c0_g1_i3.path1	novel.9857	novel.9793
TRINITY_DN12659_c0_g1_i5.path1	TRINITY_DN30636_c0_g1_i3.path1	novel.2511	TRINITY_DN27140_c0_g1_i1.path1
Pepsico2_Contig13783.path1	novel.4474	TRINITY_DN8445_c0_g1_i4.path1	TRINITY_DN13254_c1_g1_i1.path1
novel.2274	TRINITY_DN110584_c0_g1_i1.path1	TRINITY_DN11282_c2_g1_i1.path1	Pepsico2_Contig20350.path1
TRINITY_DN19148_c0_g3_i1.path1	TRINITY_DN6454_c0_g2_i1.path1	novel.23	TRINITY_DN18226_c0_g1_i1.path1
Pepsico2_Contig6346.path1	TRINITY_DN15916_c0_g1_i1.path1	Pepsico1_Contig1806.path1	novel.7166
TRINITY_DN138_c1_g1_i2.path2	TRINITY_DN41217_c0_g1_i1.path1	TRINITY_DN4504_c1_g2_i1.path1	novel.503
TRINITY_DN10334_c0_g1_i5.path1	TRINITY_DN3161_c0_g1_i1.path1	novel.742	Pepsico2_Contig1768.path1
Pepsico1_Contig4382.path1	Pepsico1_Contig71.path1	Pepsico1_Contig304.path1	TRINITY_DN25014_c0_g1_i3.path1
TRINITY_DN6365_c0_g1_i3.path1	TRINITY_DN14274_c1_g1_i7.path2	Pepsico2_Contig12802.path1	novel.5769
TRINITY_DN33800_c0_g1_i2.path2	TRINITY_DN22560_c0_g1_i4.path1	TRINITY_DN6739_c1_g1_i2.path1	novel.9848
Pepsico2_Contig16982.path1	TRINITY_DN4502_c2_g1_i1.path1	TRINITY_DN47812_c0_g1_i2.path1	novel.6946
Pepsico2_Contig18152.path1	TRINITY_DN8929_c0_g1_i2.path1	novel.9464	TRINITY_DN10815_c0_g1_i1.path1
novel.6658	TRINITY_DN79890_c0_g1_i1.path1	novel.8154	novel.9574
TRINITY_DN5351_c0_g2_i1.path1	TRINITY_DN448_c0_g1_i4.path1	TRINITY_DN9737_c1_g5_i2.path1	TRINITY_DN72337_c0_g1_i1.path1
Pepsico2_Contig17803.path1	novel.5877	novel.503	TRINITY_DN35335_c0_g4_i2.path1
Pepsico2_Contig20256.path1	TRINITY_DN89378_c0_g1_i1.path1	Pepsico1_Contig337.path1	TRINITY_DN3161_c0_g1_i1.path1
TRINITY_DN16391_c0_g1_i1.path1	Pepsico2_Contig6346.path1	Pepsico1_Contig5077.path1	TRINITY_DN1834_c0_g1_i6.path3
TRINITY_DN25207_c0_g2_i3.path1	TRINITY_DN38122_c0_g1_i1.path1	novel.8351	TRINITY_DN1019_c0_g2_i1.path2
TRINITY_DN11349_c0_g1_i2.path1	Pepsico2_Contig9016.path1	novel.515	novel.8548
TRINITY_DN50361_c0_g1_i1.path1	novel.5839	TRINITY_DN4360_c2_g1_i3.path2	Pepsico1_Contig36864.path2
Pepsico1_Contig5866.path2	TRINITY_DN7744_c0_g2_i1.path1	TRINITY_DN25442_c0_g1_i1.path1	novel.4727
novel.4694	TRINITY_DN84072_c0_g1_i1.path1	novel.5600	novel.4760
TRINITY_DN976_c0_g1_i2.path2	Pepsico2_Contig14293.path1	Pepsico2_Contig20395.path1	novel.6580
TRINITY_DN19179_c0_g1_i3.path2	Pepsico2_Contig9003.path1	TRINITY_DN9519_c0_g1_i4.path1	Pepsico1_Contig7763.path1
TRINITY_DN42186_c0_g2_i1.path1	Pepsico2_Contig4402.path1	TRINITY_DN7209_c0_g1_i10.path1	novel.10561
TRINITY_DN4215_c0_g1_i1.path1	TRINITY_DN42400_c4_g1_i1.path1	Pepsico2_Contig7348.path1	TRINITY_DN24943_c0_g1_i1.path1
TRINITY_DN27622_c0_g2_i1.path1	novel.5152	TRINITY_DN969_c0_g1_i1.path1	TRINITY_DN34621_c0_g1_i1.path2
Pepsico1_Contig1024.path1	novel.5614	TRINITY_DN5056_c0_g1_i2.path1	TRINITY_DN15198_c0_g2_i2.path2
Pepsico2_Contig3832.path2	TRINITY_DN3331_c0_g1_i1.path1	Pepsico2_Contig6233.path1	TRINITY_DN13858_c0_g2_i1.path1
TRINITY_DN55806_c0_g1_i1.path1	Pepsico1_Contig601.path1	Pepsico1_Contig3658.path1	Pepsico1_Contig34820.path1
Pepsico2_Contig11330.path1	TRINITY_DN454_c0_g4_i1.path1	TRINITY_DN26184_c0_g1_i2.path1	Pepsico1_Contig892.path1
TRINITY_DN59825_c0_g1_i1.path1	TRINITY_DN13715_c0_g1_i1.path1	TRINITY_DN13830_c1_g1_i1.path1	Pepsico2_Contig14315.path1
novel.4361	novel.7540	TRINITY_DN11768_c0_g1_i1.path1	novel.5704
TRINITY_DN15251_c0_g1_i1.path1	Pepsico2_Contig3799.path1	TRINITY_DN6942_c0_g1_i2.path1	TRINITY_DN108824_c0_g1_i1.path1
Pepsico1_Contig536.path1	TRINITY_DN9385_c2_g2_i1.path1	novel.1353	Pepsico2_Contig498.path1
TRINITY_DN33313_c0_g2_i2.path1	TRINITY_DN16513_c0_g2_i1.path1	TRINITY_DN9569_c0_g1_i3.path3	TRINITY_DN36422_c0_g1_i5.path2
TRINITY_DN32090_c0_g2_i1.path1	TRINITY_DN53169_c0_g1_i1.path2	TRINITY_DN19732_c1_g1_i2.path2	TRINITY_DN7061_c0_g1_i3.path1
TRINITY_DN11083_c0_g1_i15.path1	TRINITY_DN59616_c0_g1_i1.path1	TRINITY_DN5970_c2_g1_i1.path1	TRINITY_DN12758_c2_g2_i1.path1
novel.1549	novel.9716	Pepsico2_Contig19585.path1	Pepsico1_Contig4010.path1
Pepsico2_Contig17058.path1	TRINITY_DN10547_c0_g1_i17.path1	TRINITY_DN20518_c0_g1_i1.path1	TRINITY_DN15065_c0_g2_i1.path1
TRINITY_DN8283_c0_g1_i1.path2	novel.2845	TRINITY_DN11161_c0_g1_i5.path1	TRINITY_DN20757_c0_g1_i1.path1
novel.3939	Pepsico1_Contig239.path1	TRINITY_DN28511_c0_g1_i5.path1	novel.1529
Pepsico2_Contig1104.path1	TRINITY_DN28712_c0_g1_i1.path1	TRINITY_DN21081_c0_g1_i1.path1	TRINITY_DN4437_c0_g1_i2.path2
Pepsico2_Contig17522.path1	Pepsico2_Contig19525.path1	novel.6249	Pepsico2_Contig1967.path1
TRINITY_DN29073_c0_g1_i3.path2	Pepsico2_Contig2860.path1	TRINITY_DN1459_c0_g2_i3.path1	novel.9624
Pepsico1_Contig2179.path2	TRINITY_DN24525_c0_g1_i1.path1	Pepsico2_Contig13720.path1	TRINITY_DN7691_c1_g2_i1.path1
novel.3694	Pepsico2_Contig17537.path1	TRINITY_DN30113_c0_g1_i1.path1	TRINITY_DN96191_c0_g1_i1.path1
TRINITY_DN1581_c0_g1_i3.path2	Pepsico1_Contig33714.path1	TRINITY_DN68790_c0_g1_i1.path1	novel.2343
novel.8910	novel.7047	TRINITY_DN12758_c2_g2_i1.path1	TRINITY_DN6865_c0_g1_i14.path1
TRINITY_DN14238_c1_g1_i1.path1	TRINITY_DN4789_c0_g1_i1.path3	Pepsico2_Contig9312.path1	novel.9022
novel.5249	Pepsico2_Contig4423.path1	novel.7498	Pepsico2_Contig16982.path2
Pepsico2_Contig12158.path2	TRINITY_DN19043_c0_g1_i1.path1	TRINITY_DN27140_c0_g1_i1.path1	TRINITY_DN9637_c0_g1_i4.path1
Pepsico2_Contig8532.path2	Pepsico1_Contig3093.path1	TRINITY_DN14212_c0_g1_i1.path1	TRINITY_DN20165_c0_g1_i1.path1
TRINITY_DN9582_c0_g1_i1.path1	Pepsico1_Contig30548.path2	novel.10217	TRINITY_DN17545_c0_g1_i1.path1
TRINITY_DN17321_c0_g1_i4.path1	TRINITY_DN37834_c0_g4_i1.path1	TRINITY_DN14265_c0_g1_i2.path1	Pepsico2_Contig638.path1
Pepsico1_Contig5362.path2	TRINITY_DN78422_c0_g1_i2.path1	TRINITY_DN2210_c0_g2_i3.path1	TRINITY_DN33817_c0_g1_i1.path2
novel.1699	TRINITY_DN62134_c5_g1_i1.path1	TRINITY_DN96191_c0_g1_i1.path1	TRINITY_DN2098_c0_g2_i1.path1
Pepsico2_Contig18269.path1	TRINITY_DN25070_c0_g1_i1.path2	novel.5929	TRINITY_DN110584_c0_g1_i1.path1
TRINITY_DN16572_c0_g2_i2.path2	TRINITY_DN751_c0_g1_i3.path1	TRINITY_DN10815_c0_g1_i1.path1	novel.4602
Pepsico1_Contig5732.path2	novel.9687	Pepsico2_Contig17550.path2	TRINITY_DN1803_c3_g1_i1.path1
TRINITY_DN20290_c0_g1_i2.path1	Pepsico2_Contig10642.path2	TRINITY_DN57700_c0_g1_i1.path1	TRINITY_DN104093_c0_g1_i1.path2
TRINITY_DN2098_c0_g2_i1.path1	Pepsico2_Contig4927.path1	TRINITY_DN17301_c0_g1_i1.path1	TRINITY_DN40521_c0_g1_i2.path1
Pepsico2_Contig17264.path1	Pepsico1_Contig32793.path1	novel.9616	TRINITY_DN36993_c0_g1_i1.path1
novel.2121	TRINITY_DN9136_c1_g2_i1.path1	TRINITY_DN33756_c0_g1_i1.path1	TRINITY_DN4640_c0_g2_i1.path2
novel.7357	Pepsico1_Contig2484.path1	Pepsico2_Contig11149.path1	Pepsico2_Contig20155.path1
TRINITY_DN16330_c0_g1_i2.path2	novel.8998	novel.3593	TRINITY_DN12280_c0_g2_i1.path1
Pepsico1_Contig3834.path1	Pepsico1_Contig106.path1	TRINITY_DN21916_c0_g1_i1.path1	novel.5044
Pepsico1_Contig1970.path1	novel.2326	Pepsico2_Contig15323.path1	TRINITY_DN19368_c0_g1_i7.path1
TRINITY_DN9204_c0_g2_i4.path1	Pepsico2_Contig11667.path1	TRINITY_DN33307_c0_g1_i2.path1	TRINITY_DN19732_c1_g1_i2.path1
Pepsico1_Contig1239.path1	novel.4360	novel.1275	Pepsico1_Contig672.path2
Pepsico2_Contig17856.path1	Pepsico2_Contig12308.path2	Pepsico1_Contig37214.path1	TRINITY_DN18747_c0_g1_i10.path1
TRINITY_DN21717_c0_g1_i1.path2	TRINITY_DN103453_c0_g1_i1.path1	TRINITY_DN8939_c0_g1_i1.path1	TRINITY_DN7691_c0_g1_i1.path1
TRINITY_DN5482_c0_g1_i1.path1	TRINITY_DN19018_c0_g1_i1.path2	TRINITY_DN9291_c0_g1_i1.path1	novel.8008
novel.278	TRINITY_DN3070_c1_g1_i2.path1	novel.8167	TRINITY_DN18559_c0_g1_i2.path3
Pepsico1_Contig6523.path1	Pepsico2_Contig3832.path2	novel.1050	Pepsico1_Contig2452.path1
TRINITY_DN20657_c0_g1_i2.path1	novel.9314	TRINITY_DN23642_c0_g2_i1.path1	Pepsico1_Contig1252.path1
Pepsico1_Contig473.path1	TRINITY_DN4506_c0_g1_i2.path1	Pepsico2_Contig11219.path1	novel.8552
TRINITY_DN4808_c0_g1_i3.path3	novel.4164	TRINITY_DN19377_c0_g1_i3.path1	Pepsico1_Contig294.path1
TRINITY_DN6678_c0_g2_i1.path1	TRINITY_DN78849_c0_g1_i1.path1	TRINITY_DN22584_c1_g1_i1.path1	novel.8660
Pepsico2_Contig17328.path1	novel.8154	TRINITY_DN19900_c0_g2_i1.path1	TRINITY_DN6989_c0_g1_i1.path1
TRINITY_DN63863_c0_g1_i1.path1	Pepsico1_Contig2800.path1	Pepsico2_Contig3495.path1	TRINITY_DN96412_c0_g1_i1.path1
TRINITY_DN24142_c0_g2_i1.path3	TRINITY_DN14567_c0_g3_i1.path1	Pepsico1_Contig814.path2	TRINITY_DN8939_c0_g1_i1.path1
novel.9180	TRINITY_DN52025_c0_g1_i2.path1	TRINITY_DN6995_c1_g2_i1.path2	novel.9929
TRINITY_DN89373_c0_g1_i1.path1	TRINITY_DN5180_c0_g2_i3.path1	TRINITY_DN2809_c0_g1_i14.path1	TRINITY_DN17906_c0_g1_i1.path1
novel.7678	novel.7507	novel.2677	Pepsico1_Contig2398.path2
TRINITY_DN17397_c0_g1_i2.path1	TRINITY_DN34243_c1_g1_i1.path1	novel.10351	TRINITY_DN3543_c0_g1_i5.path1
novel.23	TRINITY_DN18489_c1_g1_i1.path1	Pepsico1_Contig8213.path1	TRINITY_DN6662_c0_g1_i6.path1
TRINITY_DN107150_c0_g1_i1.path1	Pepsico1_Contig244.path1	TRINITY_DN14014_c1_g1_i1.path1	Pepsico2_Contig31.path1
TRINITY_DN18880_c0_g1_i13.path1	novel.9659	TRINITY_DN4879_c0_g2_i1.path1	TRINITY_DN18607_c0_g1_i2.path1
TRINITY_DN3309_c1_g1_i2.path1	novel.50	TRINITY_DN5939_c0_g3_i1.path1	TRINITY_DN11345_c0_g1_i3.path1
TRINITY_DN57133_c0_g1_i1.path1	Pepsico2_Contig17730.path1	Pepsico1_Contig32727.path1	TRINITY_DN19834_c0_g1_i3.path1
TRINITY_DN58751_c0_g1_i1.path1	Pepsico1_Contig878.path1	TRINITY_DN15695_c0_g1_i3.path1	TRINITY_DN103356_c0_g1_i1.path1
TRINITY_DN90569_c0_g1_i1.path1	Pepsico2_Contig4456.path2	TRINITY_DN65056_c0_g1_i1.path1	TRINITY_DN22584_c0_g2_i1.path1
TRINITY_DN28245_c0_g2_i1.path1	TRINITY_DN9370_c0_g2_i1.path1	TRINITY_DN11593_c3_g1_i1.path1	TRINITY_DN14383_c0_g2_i2.path1
Pepsico1_Contig2275.path1	TRINITY_DN14174_c0_g3_i1.path1	TRINITY_DN9426_c0_g1_i3.path1	TRINITY_DN31052_c0_g2_i1.path1
novel.8125	Pepsico2_Contig12502.path1	Pepsico2_Contig9403.path2	novel.7507
novel.2890	novel.101	TRINITY_DN7190_c0_g3_i1.path1	novel.232
Pepsico2_Contig791.path1	TRINITY_DN17578_c0_g1_i2.path1	Pepsico1_Contig2723.path1	TRINITY_DN18011_c0_g1_i4.path3
TRINITY_DN14174_c0_g3_i1.path1	TRINITY_DN3153_c0_g3_i2.path1	Pepsico1_Contig196.path1	TRINITY_DN11303_c1_g1_i4.path2
TRINITY_DN1968_c0_g1_i4.path2	TRINITY_DN19182_c0_g1_i2.path2	Pepsico2_Contig1781.path1	TRINITY_DN62279_c0_g1_i1.path1
TRINITY_DN68790_c0_g1_i1.path1	TRINITY_DN2809_c0_g1_i14.path1	TRINITY_DN14849_c0_g1_i11.path1	TRINITY_DN33800_c0_g1_i2.path2
novel.3990	Pepsico2_Contig2459.path1	TRINITY_DN9890_c0_g1_i6.path2	TRINITY_DN85435_c0_g1_i1.path1
TRINITY_DN5860_c0_g1_i6.path2	Pepsico2_Contig3506.path1	TRINITY_DN32113_c0_g1_i1.path1	Pepsico2_Contig7754.path1
TRINITY_DN30636_c0_g1_i3.path1	Pepsico1_Contig1806.path1	TRINITY_DN7146_c0_g1_i2.path3	TRINITY_DN5707_c0_g1_i2.path3
TRINITY_DN56218_c0_g1_i1.path1	novel.1461	TRINITY_DN3853_c0_g1_i1.path1	TRINITY_DN506_c0_g1_i4.path1
TRINITY_DN410_c2_g1_i8.path2	TRINITY_DN41330_c0_g1_i2.path2	TRINITY_DN52802_c0_g1_i1.path1	TRINITY_DN23496_c0_g1_i2.path2
novel.9373	TRINITY_DN245_c0_g2_i1.path1	TRINITY_DN10932_c1_g1_i1.path1	TRINITY_DN37338_c0_g2_i1.path1
novel.9425	novel.1603	TRINITY_DN61305_c0_g1_i1.path1	Pepsico1_Contig7054.path1
Pepsico2_Contig17659.path1	TRINITY_DN4204_c0_g1_i1.path1	TRINITY_DN19759_c0_g2_i2.path1	Pepsico2_Contig11289.path2
TRINITY_DN9763_c0_g1_i1.path2	TRINITY_DN13254_c1_g1_i1.path1	TRINITY_DN10443_c0_g1_i1.path2	TRINITY_DN27615_c0_g1_i1.path1
novel.6691	TRINITY_DN10241_c1_g3_i1.path1	TRINITY_DN37597_c0_g2_i1.path1	novel.4447
Pepsico1_Contig2405.path1	TRINITY_DN37934_c0_g1_i3.path1	novel.5121	novel.6906
TRINITY_DN15455_c0_g1_i7.path3	TRINITY_DN249_c0_g3_i1.path1	TRINITY_DN11150_c1_g2_i1.path1	Pepsico2_Contig9615.path1
novel.6885	Pepsico1_Contig4766.path1	TRINITY_DN24554_c0_g1_i1.path1	TRINITY_DN6470_c2_g1_i3.path1
TRINITY_DN11842_c0_g1_i1.path1	TRINITY_DN1583_c0_g1_i1.path1	TRINITY_DN35543_c0_g1_i4.path1	Pepsico2_Contig14090.path1
TRINITY_DN5873_c2_g1_i1.path1	TRINITY_DN52802_c0_g1_i1.path1	TRINITY_DN37972_c0_g1_i2.path2	TRINITY_DN4979_c0_g2_i5.path2
TRINITY_DN8945_c0_g1_i3.path1	TRINITY_DN29271_c0_g1_i2.path1	TRINITY_DN108097_c0_g1_i1.path1	TRINITY_DN71999_c0_g1_i1.path1
TRINITY_DN84840_c0_g1_i1.path1	TRINITY_DN32451_c0_g1_i2.path3	TRINITY_DN24125_c0_g1_i1.path1	Pepsico2_Contig17682.path1
TRINITY_DN76691_c0_g1_i1.path1	TRINITY_DN91808_c0_g1_i1.path1	novel.4935	Pepsico2_Contig7277.path1
Pepsico2_Contig11033.path1	TRINITY_DN13858_c0_g2_i1.path1	TRINITY_DN14975_c0_g1_i4.path1	TRINITY_DN320_c0_g1_i1.path1
TRINITY_DN15885_c0_g1_i1.path2	TRINITY_DN8939_c0_g1_i1.path1	Pepsico1_Contig2677.path1	novel.9974
Pepsico2_Contig4677.path1	TRINITY_DN582_c2_g1_i6.path1	TRINITY_DN7096_c0_g3_i1.path1	novel.2121
TRINITY_DN42903_c0_g1_i1.path2	TRINITY_DN36978_c0_g1_i1.path1	TRINITY_DN61215_c0_g1_i1.path1	Pepsico2_Contig6501.path1
Pepsico1_Contig2034.path2	novel.2801	novel.2380	TRINITY_DN29334_c0_g1_i1.path1
TRINITY_DN42903_c0_g1_i1.path1	TRINITY_DN7096_c0_g3_i1.path1	Pepsico2_Contig1496.path1	novel.2160
TRINITY_DN69200_c0_g1_i1.path1	TRINITY_DN4502_c0_g2_i1.path1	TRINITY_DN90490_c0_g1_i1.path1	TRINITY_DN14497_c0_g1_i2.path1
TRINITY_DN9154_c0_g2_i1.path1	TRINITY_DN24057_c0_g1_i9.path1	TRINITY_DN771_c0_g1_i2.path1	Pepsico1_Contig7788.path1
Pepsico2_Contig17718.path1	Pepsico2_Contig2494.path2	TRINITY_DN28154_c0_g1_i4.path1	Pepsico2_Contig12155.path1
TRINITY_DN826_c0_g1_i8.path2	TRINITY_DN24786_c0_g1_i1.path1	TRINITY_DN25384_c0_g1_i1.path2	TRINITY_DN3768_c0_g1_i9.path2
TRINITY_DN8820_c0_g1_i1.path1	novel.1731	Pepsico1_Contig31810.path1	TRINITY_DN60703_c0_g1_i1.path2
TRINITY_DN38626_c0_g3_i1.path1	Pepsico1_Contig5048.path1	TRINITY_DN4595_c0_g3_i1.path1	TRINITY_DN20672_c0_g1_i1.path3
TRINITY_DN27067_c1_g1_i1.path1	TRINITY_DN1984_c0_g1_i3.path1	Pepsico2_Contig17058.path1	TRINITY_DN9899_c0_g1_i1.path1
TRINITY_DN876_c1_g3_i3.path1	Pepsico1_Contig7855.path1	TRINITY_DN15455_c0_g1_i7.path2	TRINITY_DN693_c1_g1_i1.path1
TRINITY_DN78221_c0_g1_i1.path1	TRINITY_DN106452_c0_g1_i1.path1	novel.1031	TRINITY_DN4919_c0_g6_i2.path1
novel.9973	TRINITY_DN582_c2_g1_i6.path2	novel.1301	Pepsico1_Contig5984.path1
novel.10100	TRINITY_DN35789_c0_g1_i1.path2	novel.7130	TRINITY_DN14704_c0_g1_i1.path2
TRINITY_DN19578_c0_g2_i1.path1	Pepsico1_Contig2079.path1	Pepsico2_Contig12726.path1	TRINITY_DN14002_c2_g1_i1.path1
TRINITY_DN13895_c0_g1_i2.path1	novel.8808	novel.9736	TRINITY_DN25751_c0_g1_i2.path1
TRINITY_DN31415_c0_g1_i2.path1	Pepsico2_Contig20155.path1	TRINITY_DN21239_c0_g2_i1.path1	novel.5188
TRINITY_DN61508_c0_g1_i1.path1	novel.2937	TRINITY_DN43546_c0_g2_i1.path1	novel.7660
TRINITY_DN29732_c0_g1_i1.path1	novel.3971	Pepsico2_Contig8757.path1	novel.1312
TRINITY_DN28145_c0_g2_i3.path1	TRINITY_DN5135_c0_g2_i1.path1	novel.3680	novel.5303
novel.5475	TRINITY_DN9686_c0_g2_i1.path1	TRINITY_DN11195_c1_g1_i1.path2	Pepsico1_Contig1934.path1
Pepsico2_Contig13220.path1	TRINITY_DN15645_c1_g1_i8.path1	novel.9478	TRINITY_DN65352_c0_g1_i1.path1
Pepsico2_Contig8026.path1	TRINITY_DN20252_c0_g1_i1.path1	TRINITY_DN16063_c0_g1_i1.path1	TRINITY_DN36030_c0_g1_i1.path1
novel.5685	TRINITY_DN1779_c0_g1_i10.path1	novel.7882	novel.1461
TRINITY_DN11238_c0_g1_i1.path1	TRINITY_DN25998_c0_g1_i2.path2	Pepsico2_Contig7855.path1	novel.1427
TRINITY_DN17392_c0_g1_i4.path1	TRINITY_DN36021_c0_g1_i1.path1	Pepsico1_Contig3010.path1	TRINITY_DN8291_c1_g3_i8.path1
TRINITY_DN53636_c0_g1_i1.path1	Pepsico2_Contig17550.path2	novel.3971	TRINITY_DN2266_c0_g1_i4.path2
Pepsico1_Contig8012.path1	novel.8883	TRINITY_DN8444_c0_g1_i4.path1	novel.5643
TRINITY_DN44436_c1_g1_i1.path1	novel.1498	novel.2079	TRINITY_DN10118_c0_g1_i2.path1
TRINITY_DN17737_c1_g1_i1.path1	TRINITY_DN58767_c0_g1_i1.path1	novel.9358	Pepsico2_Contig13783.path2
TRINITY_DN19939_c0_g1_i4.path1	TRINITY_DN8683_c0_g1_i1.path2	TRINITY_DN9659_c0_g2_i1.path2	TRINITY_DN4518_c0_g2_i1.path1
TRINITY_DN42674_c0_g1_i1.path1	novel.9358	Pepsico2_Contig6346.path1	novel.2556
TRINITY_DN40378_c0_g2_i2.path2	TRINITY_DN32533_c0_g1_i1.path2	TRINITY_DN4919_c0_g6_i2.path1	novel.4652
TRINITY_DN1766_c0_g2_i2.path1	TRINITY_DN12642_c0_g1_i9.path1	novel.9353	TRINITY_DN44454_c0_g1_i1.path2
TRINITY_DN32487_c0_g1_i2.path1	TRINITY_DN35583_c0_g1_i4.path1	TRINITY_DN6739_c1_g1_i2.path2	TRINITY_DN59616_c0_g1_i1.path1
TRINITY_DN15885_c0_g1_i1.path1	TRINITY_DN25442_c0_g1_i1.path1	TRINITY_DN18226_c0_g1_i1.path1	novel.5777
TRINITY_DN19157_c0_g1_i5.path1	Pepsico2_Contig17684.path1	TRINITY_DN397_c0_g2_i1.path1	novel.5334
novel.9707	Pepsico1_Contig1783.path1	TRINITY_DN44454_c0_g1_i1.path2	Pepsico2_Contig17803.path1
TRINITY_DN48191_c0_g1_i1.path1	novel.9650	novel.2466	TRINITY_DN2337_c0_g1_i6.path2
TRINITY_DN26200_c0_g1_i1.path1	novel.5176	novel.2226	novel.2561
Pepsico1_Contig669.path1	Pepsico2_Contig301.path1	TRINITY_DN11063_c0_g1_i1.path1	novel.7203
novel.3593	novel.9330	novel.9497	novel.9857
TRINITY_DN20292_c1_g1_i1.path1	novel.3952	Pepsico2_Contig18065.path1	novel.6029
Pepsico2_Contig9047.path2	novel.2079	Pepsico1_Contig252.path1	novel.126
novel.9492	TRINITY_DN10437_c0_g1_i2.path1	TRINITY_DN18228_c0_g1_i4.path1	novel.7846
TRINITY_DN15750_c1_g1_i1.path1	TRINITY_DN15095_c0_g1_i1.path2	TRINITY_DN20762_c0_g1_i1.path1	novel.2231
TRINITY_DN10226_c0_g1_i1.path1	Pepsico1_Contig3658.path1	TRINITY_DN8794_c0_g2_i3.path1	TRINITY_DN44861_c0_g1_i1.path1
novel.1990	TRINITY_DN4027_c0_g5_i1.path2	TRINITY_DN21686_c1_g1_i1.path1	Pepsico2_Contig13147.path1
TRINITY_DN158_c0_g1_i1.path1	Pepsico2_Contig17253.path1	novel.4821	TRINITY_DN65056_c0_g1_i1.path2
TRINITY_DN18745_c0_g1_i2.path1	TRINITY_DN107882_c0_g1_i1.path1	TRINITY_DN8500_c0_g1_i2.path1	TRINITY_DN35875_c0_g1_i1.path1
novel.7557	TRINITY_DN11349_c0_g1_i2.path1	TRINITY_DN8445_c0_g2_i1.path1	Pepsico2_Contig5819.path1
novel.2234	novel.2969	TRINITY_DN31052_c0_g2_i1.path1	Pepsico2_Contig18331.path1
TRINITY_DN8516_c0_g1_i1.path1	TRINITY_DN37583_c0_g1_i1.path1	TRINITY_DN37516_c0_g1_i1.path1	novel.8601
TRINITY_DN35060_c1_g1_i1.path1	TRINITY_DN26227_c0_g1_i2.path1	TRINITY_DN30939_c0_g1_i2.path1	TRINITY_DN672_c1_g3_i2.path1
TRINITY_DN82075_c0_g1_i1.path1	Pepsico1_Contig28355.path1	TRINITY_DN32418_c0_g1_i1.path1	Pepsico1_Contig1872.path2
Pepsico2_Contig13783.path2	TRINITY_DN112740_c0_g1_i1.path2	TRINITY_DN2337_c0_g1_i6.path2	TRINITY_DN40354_c0_g1_i2.path1
TRINITY_DN25191_c0_g1_i2.path1	TRINITY_DN12734_c0_g2_i2.path1	TRINITY_DN7691_c0_g1_i1.path2	TRINITY_DN16599_c0_g1_i1.path1
novel.2193	Pepsico1_Contig22394.path1	Pepsico1_Contig1037.path1	TRINITY_DN10932_c1_g1_i1.path2
novel.6249	Pepsico2_Contig661.path1	Pepsico2_Contig3516.path1	Pepsico1_Contig1433.path1
TRINITY_DN9377_c0_g1_i1.path1	TRINITY_DN25461_c0_g1_i1.path2	TRINITY_DN13498_c0_g2_i1.path1	novel.3584
Pepsico1_Contig3074.path1	TRINITY_DN3174_c1_g1_i2.path1	TRINITY_DN2840_c0_g1_i2.path1	novel.2466
Pepsico2_Contig17649.path1	TRINITY_DN17829_c0_g1_i1.path2	TRINITY_DN14497_c0_g1_i2.path1	TRINITY_DN30872_c0_g1_i1.path1
TRINITY_DN65247_c0_g1_i1.path1	TRINITY_DN17321_c0_g1_i4.path1	TRINITY_DN40249_c0_g1_i1.path1	TRINITY_DN26832_c0_g1_i2.path1
Pepsico1_Contig7004.path1	novel.8861	novel.1120	TRINITY_DN18610_c0_g2_i1.path1
TRINITY_DN44082_c0_g1_i1.path1	TRINITY_DN5_c0_g1_i1.path1	novel.4048	TRINITY_DN22934_c1_g3_i2.path1
TRINITY_DN19249_c0_g1_i1.path1	TRINITY_DN877_c0_g1_i2.path1	TRINITY_DN88632_c0_g1_i1.path1	TRINITY_DN20252_c0_g1_i1.path1
Pepsico1_Contig7054.path2	TRINITY_DN20528_c0_g1_i1.path1	TRINITY_DN16801_c1_g3_i1.path1	Pepsico1_Contig4004.path3
Pepsico1_Contig1102.path1	TRINITY_DN19953_c0_g1_i3.path1	TRINITY_DN14541_c0_g1_i1.path2	TRINITY_DN15095_c0_g1_i1.path1
TRINITY_DN12104_c0_g1_i1.path3	TRINITY_DN7472_c0_g3_i1.path1	novel.5192	novel.3230
TRINITY_DN6606_c0_g1_i1.path1	TRINITY_DN29095_c0_g2_i1.path1	TRINITY_DN11717_c0_g2_i2.path1	TRINITY_DN30388_c0_g1_i1.path1
novel.3595	TRINITY_DN12913_c0_g1_i2.path1	novel.2946	Pepsico1_Contig2674.path1
Pepsico2_Contig14634.path1	TRINITY_DN11349_c0_g1_i2.path2	TRINITY_DN15420_c0_g1_i4.path1	TRINITY_DN4225_c0_g1_i11.path1
TRINITY_DN8043_c0_g1_i2.path1	TRINITY_DN14314_c1_g1_i2.path1	TRINITY_DN42170_c0_g1_i1.path1	novel.4061
TRINITY_DN6150_c0_g1_i3.path1	TRINITY_DN49656_c0_g1_i1.path1	TRINITY_DN8353_c0_g1_i1.path1	TRINITY_DN28423_c0_g1_i1.path1
novel.1962	Pepsico2_Contig13783.path2	novel.8191	novel.6980
TRINITY_DN22881_c0_g1_i4.path2	TRINITY_DN39737_c0_g1_i1.path1	TRINITY_DN4604_c0_g2_i1.path1	TRINITY_DN13705_c0_g4_i1.path1
novel.2762	TRINITY_DN6606_c0_g1_i1.path1	TRINITY_DN112171_c0_g1_i1.path1	TRINITY_DN8138_c0_g4_i5.path1
TRINITY_DN20672_c0_g1_i1.path3	TRINITY_DN72452_c0_g1_i1.path1	novel.1572	Pepsico2_Contig20029.path1
TRINITY_DN69354_c0_g1_i1.path1	novel.1598	TRINITY_DN35240_c0_g1_i15.path1	TRINITY_DN30939_c0_g1_i2.path1
novel.9422	novel.8191	Pepsico1_Contig6230.path1	novel.6992
Pepsico2_Contig3522.path1	TRINITY_DN102365_c0_g1_i1.path1	TRINITY_DN12758_c1_g1_i2.path1	novel.616
TRINITY_DN6065_c0_g1_i2.path1	Pepsico2_Contig13004.path1	novel.8810	TRINITY_DN88218_c0_g1_i2.path1
TRINITY_DN14274_c1_g1_i7.path1	novel.159	TRINITY_DN934_c0_g1_i1.path1	TRINITY_DN933_c0_g1_i4.path1
TRINITY_DN20762_c0_g1_i1.path1	TRINITY_DN2354_c0_g1_i4.path2	TRINITY_DN16826_c0_g1_i2.path1	TRINITY_DN43075_c0_g1_i2.path3
TRINITY_DN14775_c0_g1_i8.path1	Pepsico1_Contig35948.path1	TRINITY_DN60446_c0_g1_i1.path3	TRINITY_DN22881_c0_g1_i4.path2
Pepsico2_Contig4927.path2	Pepsico2_Contig15246.path1	TRINITY_DN628_c0_g2_i3.path1	novel.3952
Pepsico1_Contig574.path1	Pepsico2_Contig8590.path1	Pepsico2_Contig17052.path1	novel.6930
TRINITY_DN14167_c0_g1_i1.path1	Pepsico1_Contig4563.path1	Pepsico2_Contig7426.path1	TRINITY_DN35164_c0_g1_i1.path1
TRINITY_DN66558_c0_g1_i1.path1	TRINITY_DN18185_c0_g1_i6.path1	TRINITY_DN39623_c0_g1_i1.path1	novel.8529
Pepsico2_Contig2459.path1	Pepsico2_Contig8026.path1	Pepsico1_Contig300.path1	Pepsico2_Contig12692.path5
novel.9948	novel.4532	TRINITY_DN25014_c0_g1_i3.path1	TRINITY_DN2809_c0_g1_i14.path1
Pepsico2_Contig13304.path1	TRINITY_DN13964_c0_g2_i1.path1	TRINITY_DN9623_c0_g1_i1.path2	TRINITY_DN1040_c0_g1_i1.path1
TRINITY_DN15088_c0_g1_i1.path1	TRINITY_DN30113_c0_g1_i1.path1	novel.7165	TRINITY_DN20691_c0_g1_i1.path1
TRINITY_DN7146_c0_g2_i1.path1	Pepsico2_Contig19690.path1	TRINITY_DN63758_c0_g1_i1.path1	Pepsico2_Contig19863.path2
TRINITY_DN39348_c0_g1_i1.path1	Pepsico1_Contig24970.path1	TRINITY_DN19368_c0_g1_i7.path1	novel.1535
TRINITY_DN5942_c1_g1_i4.path2	TRINITY_DN4474_c1_g2_i1.path1	TRINITY_DN32525_c0_g1_i1.path1	Pepsico2_Contig13425.path1
TRINITY_DN106898_c0_g1_i1.path1	Pepsico2_Contig7426.path1	TRINITY_DN10317_c0_g2_i2.path1	TRINITY_DN76691_c0_g1_i1.path1
Pepsico1_Contig2229.path2	TRINITY_DN19720_c0_g1_i1.path1	TRINITY_DN11724_c0_g1_i4.path2	novel.2123
novel.658	TRINITY_DN43549_c0_g1_i1.path2	Pepsico2_Contig7109.path1	TRINITY_DN21081_c0_g1_i1.path1
TRINITY_DN7530_c0_g1_i2.path2	novel.3990	TRINITY_DN13963_c1_g1_i1.path1	TRINITY_DN8288_c0_g2_i1.path1
TRINITY_DN11760_c0_g1_i2.path1	TRINITY_DN16063_c0_g1_i1.path1	TRINITY_DN19228_c0_g1_i7.path1	TRINITY_DN30131_c0_g1_i2.path1
TRINITY_DN11302_c0_g1_i3.path1	novel.5347	TRINITY_DN15272_c1_g1_i1.path2	TRINITY_DN24179_c1_g1_i1.path1
TRINITY_DN13645_c0_g2_i1.path3	Pepsico1_Contig125.path1	Pepsico1_Contig5432.path1	Pepsico2_Contig8166.path1
Pepsico2_Contig19452.path1	Pepsico2_Contig16783.path1	novel.3584	novel.7086
TRINITY_DN26430_c0_g1_i2.path1	TRINITY_DN15870_c0_g1_i3.path1	novel.9589	TRINITY_DN16387_c0_g1_i5.path1
Pepsico1_Contig28646.path1	TRINITY_DN70178_c0_g1_i1.path1	novel.1210	TRINITY_DN739_c0_g1_i2.path1
novel.5248	TRINITY_DN12280_c0_g2_i1.path1	Pepsico1_Contig5126.path1	TRINITY_DN28549_c0_g1_i1.path2
TRINITY_DN68934_c0_g1_i1.path1	TRINITY_DN93619_c0_g1_i1.path1	TRINITY_DN200_c0_g1_i2.path1	TRINITY_DN36713_c0_g1_i3.path1
TRINITY_DN66083_c0_g1_i1.path1	TRINITY_DN38578_c0_g4_i1.path1	TRINITY_DN15126_c0_g1_i1.path1	TRINITY_DN9400_c0_g1_i4.path3
Pepsico2_Contig7727.path1	TRINITY_DN18958_c0_g1_i3.path1	novel.9912	Pepsico2_Contig8691.path2
Pepsico2_Contig9464.path1	novel.2742	TRINITY_DN18829_c1_g1_i1.path2	novel.1301
novel.515	TRINITY_DN31069_c0_g1_i1.path3	novel.4778	Pepsico1_Contig1404.path1
novel.2466	TRINITY_DN16758_c0_g1_i1.path1	novel.7396	TRINITY_DN12300_c0_g2_i1.path1
Pepsico1_Contig2723.path1	TRINITY_DN21323_c0_g1_i1.path1	Pepsico2_Contig17047.path1	TRINITY_DN23948_c0_g1_i1.path1
TRINITY_DN21752_c0_g1_i2.path2	novel.23	TRINITY_DN21253_c0_g5_i1.path1	novel.2937
TRINITY_DN30653_c0_g1_i1.path1	Pepsico1_Contig7781.path3	Pepsico2_Contig12177.path2	novel.4953
TRINITY_DN87669_c0_g1_i1.path1	Pepsico1_Contig1382.path2	Pepsico2_Contig8620.path1	novel.8182
TRINITY_DN19239_c0_g1_i1.path1	TRINITY_DN6488_c0_g1_i1.path3	novel.3512	novel.1448
novel.751	TRINITY_DN55504_c0_g1_i1.path1	Pepsico1_Contig4678.path1	TRINITY_DN28026_c0_g1_i1.path1
novel.9602	novel.6606	Pepsico1_Contig340.path1	novel.3578
novel.6325	Pepsico2_Contig6897.path1	novel.836	TRINITY_DN9204_c0_g2_i4.path1
novel.4107	TRINITY_DN693_c1_g1_i1.path1	Pepsico2_Contig8034.path1	TRINITY_DN36019_c1_g1_i1.path1
TRINITY_DN13035_c0_g1_i13.path1	novel.9823	Pepsico1_Contig6884.path1	TRINITY_DN112536_c0_g1_i1.path1
novel.1159	TRINITY_DN9392_c0_g1_i5.path1	novel.4236	Pepsico2_Contig337.path1
TRINITY_DN276_c1_g1_i1.path1	TRINITY_DN66014_c0_g1_i1.path1	Pepsico2_Contig17149.path2	TRINITY_DN7859_c0_g1_i9.path1
Pepsico2_Contig14347.path1	TRINITY_DN26905_c0_g1_i1.path1	novel.4936	Pepsico2_Contig16831.path1
TRINITY_DN12193_c0_g2_i1.path2	Pepsico1_Contig7579.path1	novel.42	Pepsico2_Contig11410.path1
TRINITY_DN20165_c0_g1_i1.path1	TRINITY_DN52115_c0_g1_i2.path2	Pepsico1_Contig32727.path2	Pepsico1_Contig3833.path2
TRINITY_DN9871_c0_g3_i3.path1	novel.10304	Pepsico2_Contig15659.path2	TRINITY_DN20994_c0_g1_i1.path2
novel.7016	TRINITY_DN34220_c0_g1_i1.path1	TRINITY_DN14410_c0_g1_i1.path1	novel.7249
TRINITY_DN16433_c1_g1_i1.path1	novel.9903	novel.2340	Pepsico1_Contig39106.path1
Pepsico1_Contig1534.path1	novel.6297	TRINITY_DN27590_c0_g1_i2.path1	TRINITY_DN3437_c1_g1_i3.path1
TRINITY_DN23358_c0_g2_i1.path1	TRINITY_DN61511_c1_g1_i1.path1	novel.9652	novel.1079
TRINITY_DN27463_c0_g1_i1.path1	TRINITY_DN8792_c0_g1_i1.path2	novel.9723	TRINITY_DN29073_c0_g1_i3.path2
novel.1284	novel.8625	TRINITY_DN79603_c0_g1_i1.path1	TRINITY_DN21686_c1_g1_i1.path1
TRINITY_DN34723_c0_g1_i1.path1	Pepsico2_Contig6486.path1	novel.4067	TRINITY_DN18464_c0_g1_i1.path1
TRINITY_DN52160_c0_g1_i1.path1	TRINITY_DN114306_c0_g1_i1.path1	Pepsico2_Contig17521.path1	TRINITY_DN14314_c1_g1_i2.path1
novel.4048	TRINITY_DN107367_c0_g1_i1.path1	TRINITY_DN91049_c0_g1_i1.path2	novel.9736
TRINITY_DN35_c0_g2_i1.path1	TRINITY_DN102914_c0_g1_i1.path1	novel.8600	TRINITY_DN30069_c0_g2_i1.path1
TRINITY_DN9439_c0_g2_i5.path1	novel.1005	novel.5006	TRINITY_DN13963_c1_g1_i1.path1
Pepsico2_Contig4417.path1	novel.4760	TRINITY_DN3073_c1_g1_i2.path1	TRINITY_DN249_c0_g3_i1.path1
TRINITY_DN17687_c0_g2_i2.path1	TRINITY_DN21832_c0_g1_i1.path1	Pepsico2_Contig12155.path1	TRINITY_DN55546_c0_g1_i1.path1
novel.531	TRINITY_DN33468_c0_g1_i2.path1	Pepsico2_Contig6569.path1	TRINITY_DN4595_c0_g3_i1.path2
Pepsico2_Contig9996.path1	TRINITY_DN7066_c0_g1_i2.path1	TRINITY_DN4027_c5_g1_i1.path3	TRINITY_DN90434_c0_g1_i1.path1
TRINITY_DN553_c0_g3_i1.path1	TRINITY_DN16522_c0_g1_i3.path2	TRINITY_DN2337_c0_g2_i1.path1	TRINITY_DN113066_c0_g1_i1.path1
Pepsico2_Contig5071.path1	Pepsico1_Contig3087.path1	Pepsico1_Contig892.path2	TRINITY_DN4921_c0_g1_i5.path2
TRINITY_DN1619_c0_g1_i3.path1	Pepsico2_Contig12695.path2	novel.3557	TRINITY_DN40695_c0_g2_i2.path1
TRINITY_DN3331_c0_g1_i1.path1	TRINITY_DN32491_c0_g1_i2.path1	TRINITY_DN37338_c0_g2_i1.path1	novel.994
TRINITY_DN99570_c0_g1_i1.path1	Pepsico2_Contig9403.path2	TRINITY_DN18829_c1_g1_i1.path3	novel.4907
Pepsico1_Contig5739.path1	novel.10543	TRINITY_DN40886_c0_g1_i1.path1	novel.2313
novel.5614	novel.9973	novel.7060	TRINITY_DN52802_c0_g1_i1.path1
Pepsico2_Contig15229.path2	novel.1001	novel.2816	TRINITY_DN9612_c0_g1_i1.path2
TRINITY_DN3489_c0_g1_i2.path1	TRINITY_DN18061_c0_g1_i1.path1	novel.9840	TRINITY_DN68790_c0_g1_i1.path1
Pepsico1_Contig4402.path1	Pepsico1_Contig874.path1	TRINITY_DN15198_c0_g2_i2.path2	TRINITY_DN21050_c0_g1_i1.path1
TRINITY_DN1387_c0_g1_i2.path2	TRINITY_DN20672_c0_g1_i1.path3	TRINITY_DN19030_c0_g1_i2.path1	Pepsico2_Contig16423.path1
Pepsico1_Contig819.path1	TRINITY_DN19030_c0_g1_i2.path1	TRINITY_DN17168_c1_g1_i2.path1	Pepsico2_Contig8516.path2
Pepsico2_Contig5887.path1	TRINITY_DN87900_c0_g1_i1.path1	TRINITY_DN28048_c0_g1_i1.path2	TRINITY_DN14321_c0_g1_i1.path2
novel.6523	TRINITY_DN5109_c0_g1_i2.path1	TRINITY_DN11181_c0_g1_i3.path1	novel.8682
novel.1427	novel.8711	TRINITY_DN11282_c1_g2_i1.path1	TRINITY_DN58726_c0_g1_i1.path1
TRINITY_DN15654_c1_g3_i1.path1	TRINITY_DN9289_c0_g1_i1.path1	Pepsico2_Contig10648.path1	Pepsico1_Contig25289.path1
TRINITY_DN4331_c0_g1_i1.path1	TRINITY_DN19086_c0_g1_i2.path1	TRINITY_DN47408_c0_g1_i1.path1	novel.4474
TRINITY_DN693_c1_g1_i1.path1	Pepsico1_Contig4201.path1	TRINITY_DN26639_c0_g1_i1.path1	TRINITY_DN8579_c0_g1_i12.path3
novel.9312	novel.2076	TRINITY_DN2210_c0_g1_i2.path1	Pepsico2_Contig12826.path1
TRINITY_DN33661_c0_g1_i1.path1	TRINITY_DN3707_c0_g1_i10.path1	novel.158	TRINITY_DN6739_c1_g1_i2.path1
TRINITY_DN40440_c0_g2_i1.path1	TRINITY_DN22357_c0_g1_i2.path1	Pepsico2_Contig20608.path1	TRINITY_DN29568_c0_g1_i1.path1
novel.2160	Pepsico1_Contig304.path1	Pepsico2_Contig367.path1	novel.836
novel.8417	novel.1427	novel.2937	TRINITY_DN15392_c0_g1_i1.path1
TRINITY_DN25489_c0_g1_i1.path1	Pepsico2_Contig16982.path1	TRINITY_DN2977_c0_g1_i11.path1	TRINITY_DN19861_c0_g1_i3.path1
TRINITY_DN30562_c0_g1_i1.path2	Pepsico2_Contig3832.path1	TRINITY_DN110584_c0_g1_i1.path1	TRINITY_DN10178_c0_g2_i5.path1
Pepsico2_Contig17253.path1	Pepsico1_Contig5432.path1	novel.278	TRINITY_DN23642_c0_g2_i1.path1
TRINITY_DN60446_c0_g1_i1.path3	Pepsico2_Contig20865.path1	TRINITY_DN25751_c0_g1_i2.path1	TRINITY_DN26408_c0_g1_i1.path1
TRINITY_DN21421_c0_g1_i1.path2	novel.9472	novel.7557	TRINITY_DN7884_c0_g1_i4.path1
TRINITY_DN618_c0_g1_i2.path1	TRINITY_DN32389_c0_g1_i1.path1	TRINITY_DN9686_c0_g2_i1.path1	TRINITY_DN45971_c0_g1_i3.path1
TRINITY_DN39677_c0_g3_i1.path1	Pepsico2_Contig4818.path1	Pepsico1_Contig5362.path2	TRINITY_DN29531_c0_g1_i1.path2
Pepsico1_Contig3863.path1	Pepsico2_Contig1362.path1	TRINITY_DN47451_c0_g1_i2.path1	Pepsico1_Contig304.path1
TRINITY_DN28712_c0_g1_i1.path1	TRINITY_DN12178_c0_g1_i2.path1	TRINITY_DN15788_c0_g1_i1.path1	Pepsico1_Contig6100.path1
Pepsico1_Contig4766.path1	novel.3761	novel.6630	novel.2005
TRINITY_DN40531_c0_g2_i1.path1	Pepsico2_Contig2528.path1	novel.7783	Pepsico1_Contig7402.path1
TRINITY_DN40004_c0_g1_i2.path1	Pepsico2_Contig8025.path1	TRINITY_DN26045_c0_g1_i4.path1	novel.4978
TRINITY_DN5355_c1_g1_i3.path1	novel.8458	TRINITY_DN17175_c0_g1_i4.path2	TRINITY_DN37380_c0_g3_i1.path1
Pepsico2_Contig19999.path1	TRINITY_DN18237_c0_g1_i2.path1	TRINITY_DN17766_c0_g1_i1.path1	Pepsico1_Contig4380.path2
novel.5054	TRINITY_DN43131_c0_g1_i2.path1	TRINITY_DN12664_c0_g1_i3.path2	novel.2831
novel.5323	TRINITY_DN36995_c0_g1_i1.path1	Pepsico1_Contig4130.path1	novel.4176
Pepsico1_Contig3259.path1	Pepsico2_Contig18121.path1	Pepsico2_Contig3799.path1	TRINITY_DN13274_c0_g1_i1.path1
novel.3359	Pepsico1_Contig28749.path1	TRINITY_DN35580_c0_g1_i6.path1	novel.769
novel.4697	TRINITY_DN78470_c0_g1_i1.path1	TRINITY_DN112088_c0_g1_i1.path1	TRINITY_DN9201_c0_g1_i1.path1
Pepsico2_Contig732.path1	TRINITY_DN60146_c0_g1_i1.path1	TRINITY_DN13202_c0_g1_i2.path1	TRINITY_DN4484_c1_g1_i2.path1
novel.3072	Pepsico1_Contig32727.path2	TRINITY_DN31162_c0_g2_i2.path1	TRINITY_DN14737_c0_g1_i1.path2
Pepsico1_Contig1762.path1	Pepsico2_Contig7448.path1	Pepsico1_Contig538.path1	Pepsico2_Contig17684.path1
TRINITY_DN31917_c0_g1_i1.path1	Pepsico1_Contig6884.path1	TRINITY_DN48958_c0_g1_i2.path1	Pepsico1_Contig1245.path1
Pepsico2_Contig404.path1	Pepsico1_Contig6045.path1	Pepsico1_Contig2546.path1	TRINITY_DN11345_c0_g1_i3.path2
novel.1742	TRINITY_DN3489_c0_g1_i2.path1	TRINITY_DN3543_c0_g1_i5.path1	TRINITY_DN8996_c0_g1_i3.path2
TRINITY_DN12952_c0_g5_i1.path1	TRINITY_DN17858_c0_g1_i4.path1	TRINITY_DN12466_c0_g1_i5.path1	TRINITY_DN25922_c0_g1_i1.path1
Pepsico1_Contig2628.path2	Pepsico1_Contig6100.path1	novel.2119	TRINITY_DN42759_c0_g1_i4.path3
TRINITY_DN27003_c1_g1_i1.path1	novel.3853	TRINITY_DN5076_c0_g1_i5.path1	novel.1120
Pepsico2_Contig12716.path1	TRINITY_DN826_c0_g1_i8.path2	Pepsico2_Contig19863.path2	Pepsico2_Contig9913.path1
novel.3888	novel.5310	TRINITY_DN19953_c0_g1_i3.path1	TRINITY_DN14975_c0_g1_i4.path1
novel.4368	TRINITY_DN32075_c0_g5_i3.path1	Pepsico2_Contig20342.path1	TRINITY_DN18524_c0_g1_i1.path1
novel.2003	novel.4978	TRINITY_DN36019_c1_g1_i1.path2	novel.5006
TRINITY_DN77969_c0_g1_i1.path1	TRINITY_DN36731_c0_g1_i1.path2	Pepsico2_Contig6800.path1	TRINITY_DN17729_c0_g1_i1.path1
novel.8657	TRINITY_DN38078_c0_g1_i1.path1	TRINITY_DN19739_c0_g1_i1.path1	TRINITY_DN22987_c0_g1_i1.path1
TRINITY_DN18610_c0_g2_i1.path1	TRINITY_DN17296_c0_g1_i2.path2	TRINITY_DN36021_c0_g1_i1.path1	novel.92
Pepsico2_Contig15768.path2	novel.8337	TRINITY_DN12381_c0_g1_i1.path1	Pepsico2_Contig661.path1
Pepsico2_Contig12476.path2	TRINITY_DN5662_c0_g1_i3.path1	TRINITY_DN23706_c0_g1_i1.path1	TRINITY_DN42400_c4_g1_i1.path1
TRINITY_DN1917_c0_g1_i1.path2	TRINITY_DN25014_c0_g1_i3.path1	Pepsico2_Contig14825.path1	novel.8801
TRINITY_DN13200_c0_g1_i1.path2	TRINITY_DN4515_c0_g1_i17.path2	TRINITY_DN9136_c1_g2_i1.path1	TRINITY_DN12_c0_g1_i1.path2
TRINITY_DN60938_c0_g1_i1.path1	TRINITY_DN25186_c0_g1_i1.path3	novel.2086	TRINITY_DN22897_c0_g1_i1.path1
TRINITY_DN7521_c0_g1_i1.path2	Pepsico2_Contig668.path1	novel.5551	TRINITY_DN58083_c0_g1_i1.path1
TRINITY_DN28089_c0_g1_i1.path1	novel.4253	Pepsico2_Contig1185.path2	TRINITY_DN43075_c0_g1_i2.path1
TRINITY_DN454_c0_g4_i1.path1	TRINITY_DN15791_c0_g1_i1.path2	TRINITY_DN20518_c0_g1_i1.path2	novel.8077
novel.1185	novel.10217	TRINITY_DN20585_c0_g1_i1.path1	TRINITY_DN48822_c0_g1_i2.path1
TRINITY_DN3174_c1_g1_i2.path1	novel.2086	TRINITY_DN27890_c0_g1_i1.path1	TRINITY_DN112088_c0_g1_i1.path1
TRINITY_DN7236_c0_g1_i9.path2	novel.1572	Pepsico1_Contig1245.path1	novel.1449
Pepsico1_Contig5369.path1	TRINITY_DN21761_c0_g1_i1.path2	TRINITY_DN30150_c0_g1_i1.path1	TRINITY_DN61215_c0_g1_i1.path1
TRINITY_DN14617_c0_g3_i1.path1	TRINITY_DN31623_c1_g1_i1.path1	TRINITY_DN44824_c0_g1_i1.path5	TRINITY_DN1459_c0_g2_i3.path1
novel.667	TRINITY_DN15198_c0_g2_i2.path2	TRINITY_DN494_c0_g1_i1.path1	Pepsico2_Contig7676.path1
TRINITY_DN40548_c0_g1_i1.path1	Pepsico1_Contig5244.path1	TRINITY_DN21996_c0_g1_i1.path1	Pepsico2_Contig6897.path1
novel.4320	TRINITY_DN60446_c0_g1_i1.path3	Pepsico2_Contig19828.path1	novel.3640
TRINITY_DN19341_c0_g1_i1.path1	Pepsico2_Contig15116.path1	novel.1625	TRINITY_DN22326_c1_g1_i2.path2
Pepsico1_Contig5709.path1	Pepsico1_Contig5337.path1	novel.1427	TRINITY_DN9896_c0_g1_i7.path1
novel.6606	TRINITY_DN12417_c0_g2_i1.path1	novel.92	TRINITY_DN9154_c0_g1_i6.path1
Pepsico2_Contig14502.path1	TRINITY_DN18906_c0_g1_i8.path1	TRINITY_DN5109_c0_g1_i2.path1	TRINITY_DN48958_c0_g1_i2.path1
TRINITY_DN45040_c0_g2_i1.path2	TRINITY_DN55806_c0_g1_i1.path2	TRINITY_DN11478_c0_g1_i4.path2	Pepsico2_Contig3454.path1
TRINITY_DN92943_c0_g1_i1.path1	TRINITY_DN55287_c0_g1_i1.path3	novel.5643	Pepsico2_Contig791.path1
TRINITY_DN10933_c0_g1_i1.path2	novel.4048	novel.4061	TRINITY_DN17578_c0_g1_i2.path1
TRINITY_DN26988_c0_g1_i2.path1	novel.3584	TRINITY_DN18756_c0_g1_i1.path1	novel.7557
TRINITY_DN11138_c1_g1_i2.path1	novel.224	Pepsico2_Contig8115.path1	TRINITY_DN16433_c0_g1_i7.path1
TRINITY_DN6098_c0_g1_i2.path1	TRINITY_DN2414_c0_g2_i1.path1	TRINITY_DN25186_c0_g1_i1.path3	Pepsico1_Contig4345.path1
Pepsico2_Contig16939.path1	TRINITY_DN71027_c0_g1_i1.path1	TRINITY_DN38179_c0_g1_i1.path1	novel.1993
novel.4026	Pepsico1_Contig521.path1	TRINITY_DN27940_c0_g1_i2.path2	TRINITY_DN27832_c0_g1_i1.path1
Pepsico2_Contig18146.path1	novel.2361	TRINITY_DN2702_c0_g3_i3.path1	TRINITY_DN42057_c0_g1_i1.path1
Pepsico1_Contig7855.path1	Pepsico2_Contig8620.path1	novel.3000	TRINITY_DN38137_c0_g1_i1.path1
Pepsico2_Contig7448.path1	TRINITY_DN79503_c0_g1_i1.path1	TRINITY_DN27463_c0_g1_i1.path1	novel.1213
TRINITY_DN94912_c0_g1_i1.path1	novel.1265	TRINITY_DN113066_c0_g1_i1.path1	TRINITY_DN69304_c0_g1_i1.path1
TRINITY_DN4365_c0_g2_i1.path1	Pepsico1_Contig740.path1	novel.73	TRINITY_DN35_c0_g2_i1.path1
Pepsico1_Contig2005.path1	Pepsico2_Contig17052.path2	novel.10545	novel.6171
TRINITY_DN12873_c0_g1_i2.path2	TRINITY_DN55875_c0_g1_i2.path1	Pepsico2_Contig1744.path1	TRINITY_DN24619_c0_g1_i1.path1
Pepsico2_Contig19649.path2	TRINITY_DN17175_c0_g1_i4.path2	novel.4320	TRINITY_DN5816_c0_g1_i8.path1
TRINITY_DN37925_c0_g5_i1.path1	Pepsico2_Contig571.path1	Pepsico1_Contig7402.path1	TRINITY_DN12929_c0_g2_i1.path1
TRINITY_DN16509_c1_g1_i2.path2	TRINITY_DN115544_c0_g1_i1.path1	novel.8660	TRINITY_DN26162_c0_g1_i1.path1
Pepsico2_Contig20061.path1	TRINITY_DN11047_c0_g1_i1.path1	novel.4361	TRINITY_DN26560_c0_g3_i2.path1
Pepsico2_Contig19223.path1	Pepsico1_Contig10882.path1	TRINITY_DN22120_c0_g1_i4.path1	novel.1974
TRINITY_DN48958_c0_g1_i2.path1	TRINITY_DN33307_c0_g1_i2.path1	novel.4602	TRINITY_DN36881_c0_g3_i1.path1
TRINITY_DN2098_c1_g1_i5.path1	Pepsico1_Contig36864.path1	Pepsico2_Contig11289.path2	novel.10217
TRINITY_DN45958_c0_g1_i1.path1	novel.6971	TRINITY_DN26560_c0_g2_i1.path2	novel.7472
TRINITY_DN10620_c0_g1_i4.path1	novel.3116	TRINITY_DN46276_c0_g1_i1.path1	Pepsico2_Contig4423.path1
TRINITY_DN13237_c0_g1_i10.path1	TRINITY_DN24292_c0_g1_i4.path1	TRINITY_DN14704_c0_g1_i1.path2	TRINITY_DN59557_c0_g1_i2.path1
Pepsico2_Contig6800.path1	TRINITY_DN21686_c1_g1_i1.path1	TRINITY_DN32638_c0_g1_i1.path1	Pepsico2_Contig19467.path2
novel.2332	TRINITY_DN10470_c0_g1_i2.path1	novel.3990	TRINITY_DN21236_c1_g1_i1.path1
novel.585	novel.1566	TRINITY_DN249_c0_g3_i1.path1	novel.10125
TRINITY_DN19296_c0_g1_i3.path1	TRINITY_DN59557_c0_g1_i2.path1	novel.3952	Pepsico1_Contig6884.path1
novel.9737	TRINITY_DN20079_c0_g1_i1.path1	Pepsico2_Contig10764.path1	TRINITY_DN5942_c1_g1_i4.path1
TRINITY_DN88275_c0_g1_i1.path1	TRINITY_DN30446_c0_g1_i1.path2	novel.5777	TRINITY_DN8445_c0_g1_i4.path1
TRINITY_DN7698_c0_g1_i1.path1	TRINITY_DN496_c0_g1_i1.path1	TRINITY_DN35314_c0_g1_i3.path1	Pepsico1_Contig1393.path1
TRINITY_DN7521_c0_g1_i1.path1	TRINITY_DN3677_c0_g1_i9.path1	Pepsico1_Contig721.path1	Pepsico2_Contig8590.path1
TRINITY_DN16007_c0_g1_i1.path1	TRINITY_DN59891_c1_g1_i2.path1	Pepsico1_Contig2049.path2	Pepsico2_Contig11219.path1
Pepsico2_Contig11400.path2	TRINITY_DN20966_c0_g5_i1.path1	TRINITY_DN5621_c0_g3_i1.path1	TRINITY_DN10317_c0_g2_i2.path1
TRINITY_DN6478_c0_g1_i3.path1	Pepsico1_Contig6523.path1	TRINITY_DN10325_c0_g2_i1.path1	novel.1210
Pepsico2_Contig17072.path2	novel.4908	TRINITY_DN7830_c0_g1_i1.path1	TRINITY_DN4830_c0_g3_i1.path1
TRINITY_DN3020_c0_g1_i3.path2	novel.829	TRINITY_DN10015_c0_g1_i1.path3	novel.2079
TRINITY_DN12639_c0_g1_i6.path1	TRINITY_DN1567_c0_g1_i5.path1	TRINITY_DN15198_c0_g1_i2.path1	Pepsico2_Contig19828.path1
TRINITY_DN51636_c0_g2_i1.path1	TRINITY_DN31113_c0_g3_i2.path1	TRINITY_DN3659_c2_g1_i1.path1	Pepsico2_Contig5893.path1
TRINITY_DN7236_c0_g1_i9.path1	novel.9078	TRINITY_DN22219_c0_g1_i1.path2	TRINITY_DN27940_c0_g1_i2.path2
TRINITY_DN923_c1_g1_i1.path2	Pepsico1_Contig33380.path1	Pepsico1_Contig4396.path1	TRINITY_DN25186_c0_g1_i1.path1
TRINITY_DN8283_c0_g1_i1.path1	TRINITY_DN4477_c0_g1_i1.path1	novel.8992	TRINITY_DN12947_c0_g1_i4.path1
Pepsico2_Contig12196.path2	TRINITY_DN4894_c0_g1_i1.path2	Pepsico1_Contig32360.path1	TRINITY_DN25384_c0_g1_i1.path2
Pepsico2_Contig14974.path1	TRINITY_DN8353_c0_g1_i1.path1	novel.1477	novel.1840
TRINITY_DN19368_c0_g1_i7.path1	novel.8145	TRINITY_DN15916_c0_g1_i1.path1	Pepsico2_Contig17537.path1
TRINITY_DN18211_c0_g3_i1.path1	novel.3460	TRINITY_DN34348_c0_g2_i1.path2	TRINITY_DN29531_c0_g1_i1.path1
TRINITY_DN31074_c1_g1_i1.path1	TRINITY_DN51062_c0_g1_i1.path2	novel.5769	Pepsico2_Contig3621.path2
Pepsico1_Contig2108.path1	Pepsico2_Contig8305.path1	TRINITY_DN11687_c0_g1_i1.path1	TRINITY_DN32451_c0_g1_i2.path3
novel.8682	TRINITY_DN22038_c0_g1_i2.path1	TRINITY_DN43861_c0_g1_i2.path1	TRINITY_DN55504_c0_g1_i1.path1
Pepsico2_Contig8794.path2	TRINITY_DN20944_c0_g1_i5.path1	TRINITY_DN976_c0_g1_i2.path2	TRINITY_DN40729_c0_g1_i1.path1
TRINITY_DN23107_c0_g1_i5.path2	novel.6994	Pepsico2_Contig15659.path1	novel.9764
TRINITY_DN25139_c0_g1_i1.path1	novel.6566	Pepsico2_Contig20029.path1	TRINITY_DN18829_c1_g1_i1.path3
TRINITY_DN52884_c0_g1_i1.path1	novel.302	TRINITY_DN49039_c0_g1_i2.path1	TRINITY_DN52884_c0_g1_i1.path1
Pepsico1_Contig2609.path1	Pepsico2_Contig2365.path1	novel.10304	TRINITY_DN13072_c1_g1_i2.path1
TRINITY_DN14737_c0_g1_i1.path2	TRINITY_DN33623_c0_g1_i3.path1	novel.414	TRINITY_DN10981_c1_g1_i2.path1
TRINITY_DN4740_c0_g1_i1.path2	TRINITY_DN19031_c0_g2_i1.path1	TRINITY_DN79890_c0_g1_i1.path1	TRINITY_DN1966_c0_g1_i1.path1
TRINITY_DN14363_c0_g1_i3.path2	TRINITY_DN5273_c0_g1_i2.path2	TRINITY_DN6551_c0_g4_i2.path1	Pepsico1_Contig688.path1
TRINITY_DN19228_c0_g1_i7.path1	TRINITY_DN24121_c0_g1_i1.path1	TRINITY_DN59557_c0_g1_i2.path1	novel.6249
TRINITY_DN17793_c0_g3_i2.path1	Pepsico1_Contig26025.path1	TRINITY_DN8929_c0_g1_i2.path1	Pepsico1_Contig332.path2
TRINITY_DN958_c0_g1_i5.path2	novel.5704	novel.2184	TRINITY_DN26976_c0_g1_i3.path1
Pepsico2_Contig7676.path1	novel.1655	TRINITY_DN5286_c0_g1_i2.path1	TRINITY_DN4835_c0_g2_i1.path2
Pepsico1_Contig37083.path1	Pepsico2_Contig20029.path1	TRINITY_DN18747_c0_g1_i10.path1	Pepsico1_Contig1467.path1
novel.1627	TRINITY_DN34417_c0_g2_i1.path1	novel.3496	novel.7067
novel.2620	Pepsico2_Contig3621.path2	novel.5774	TRINITY_DN92652_c0_g1_i1.path1
TRINITY_DN25583_c0_g2_i1.path1	TRINITY_DN8089_c0_g1_i3.path1	TRINITY_DN8830_c0_g1_i19.path3	Pepsico2_Contig1589.path1
novel.3930	Pepsico1_Contig52.path2	TRINITY_DN10826_c0_g1_i2.path1	Pepsico2_Contig14508.path2
TRINITY_DN582_c2_g1_i6.path1	TRINITY_DN41519_c0_g1_i1.path1	TRINITY_DN25998_c0_g1_i2.path2	TRINITY_DN43919_c0_g1_i1.path1
TRINITY_DN31162_c0_g2_i2.path1	TRINITY_DN44508_c0_g1_i1.path1	novel.4727	TRINITY_DN16826_c0_g1_i2.path1
Pepsico1_Contig4640.path2	TRINITY_DN79890_c0_g1_i1.path2	novel.4846	TRINITY_DN8171_c0_g1_i3.path1
TRINITY_DN4491_c1_g1_i6.path1	TRINITY_DN40297_c1_g1_i1.path1	TRINITY_DN693_c1_g1_i1.path1	TRINITY_DN44751_c0_g1_i1.path1
TRINITY_DN79045_c0_g1_i1.path1	Pepsico1_Contig2089.path1	TRINITY_DN16298_c0_g2_i1.path1	novel.5082
Pepsico2_Contig20345.path1	TRINITY_DN25384_c0_g2_i1.path3	novel.2124	TRINITY_DN8830_c0_g1_i19.path3
novel.2463	TRINITY_DN21106_c0_g1_i1.path3	TRINITY_DN23077_c0_g2_i1.path2	TRINITY_DN90864_c0_g1_i1.path1
TRINITY_DN15158_c0_g2_i1.path1	TRINITY_DN8820_c0_g1_i1.path3	novel.8077	TRINITY_DN20131_c0_g1_i4.path1
TRINITY_DN92367_c0_g1_i1.path2	TRINITY_DN8457_c0_g1_i1.path2	TRINITY_DN77564_c0_g1_i1.path1	TRINITY_DN3664_c0_g3_i1.path2
novel.4778	Pepsico1_Contig36864.path2	Pepsico2_Contig19497.path1	novel.7080
novel.8437	Pepsico2_Contig17682.path1	TRINITY_DN39153_c0_g1_i1.path1	novel.3639
Pepsico1_Contig2216.path1	TRINITY_DN49805_c0_g1_i1.path2	Pepsico2_Contig20556.path1	Pepsico1_Contig1632.path2
TRINITY_DN20945_c0_g1_i4.path1	Pepsico2_Contig7718.path1	TRINITY_DN28946_c0_g1_i2.path1	TRINITY_DN60446_c0_g1_i1.path3
TRINITY_DN52196_c0_g1_i1.path2	TRINITY_DN59933_c0_g1_i1.path1	TRINITY_DN7521_c0_g1_i1.path2	Pepsico2_Contig4586.path1
novel.5080	TRINITY_DN236_c0_g1_i2.path1	TRINITY_DN20672_c0_g1_i1.path3	novel.8727
Pepsico1_Contig8489.path2	novel.2582	Pepsico2_Contig5536.path1	novel.10173
Pepsico1_Contig35521.path1	novel.9025	Pepsico2_Contig2980.path1	TRINITY_DN29005_c0_g1_i1.path1
novel.415	TRINITY_DN99485_c0_g1_i1.path1	novel.2291	TRINITY_DN18004_c0_g1_i1.path1
TRINITY_DN21668_c0_g1_i2.path1	TRINITY_DN27567_c0_g1_i1.path1	TRINITY_DN79116_c0_g1_i1.path1	TRINITY_DN5449_c0_g2_i1.path1
novel.7231	Pepsico1_Contig516.path1	Pepsico2_Contig13425.path1	TRINITY_DN93760_c0_g1_i1.path1
Pepsico2_Contig15480.path1	TRINITY_DN12659_c0_g1_i5.path1	TRINITY_DN28872_c0_g1_i2.path1	novel.5374
TRINITY_DN3020_c0_g1_i3.path1	TRINITY_DN58406_c0_g1_i1.path2	Pepsico1_Contig6612.path2	novel.8514
TRINITY_DN21152_c1_g1_i1.path1	TRINITY_DN35060_c1_g1_i1.path1	novel.7593	TRINITY_DN30818_c0_g1_i1.path1
TRINITY_DN11169_c0_g2_i1.path1	TRINITY_DN59954_c0_g1_i3.path1	novel.4351	TRINITY_DN3337_c0_g1_i3.path2
Pepsico1_Contig4517.path1	novel.306	novel.9823	Pepsico1_Contig6134.path1
TRINITY_DN84920_c0_g1_i1.path1	Pepsico2_Contig7954.path1	TRINITY_DN11450_c3_g1_i1.path1	TRINITY_DN22326_c1_g1_i2.path1
TRINITY_DN4289_c0_g7_i1.path1	TRINITY_DN113066_c0_g1_i1.path1	TRINITY_DN13858_c0_g2_i1.path1	novel.8810
Pepsico2_Contig12945.path1	novel.5375	novel.4114	TRINITY_DN26045_c0_g1_i4.path1
TRINITY_DN104051_c0_g1_i1.path1	TRINITY_DN9845_c0_g1_i2.path1	TRINITY_DN50089_c0_g1_i4.path1	novel.9053
TRINITY_DN6995_c1_g2_i1.path2	TRINITY_DN3634_c0_g1_i4.path1	TRINITY_DN88385_c0_g1_i1.path1	novel.4011
Pepsico2_Contig11035.path1	TRINITY_DN87711_c0_g1_i1.path1	novel.2141	TRINITY_DN12032_c0_g1_i1.path1
TRINITY_DN3452_c1_g1_i3.path1	TRINITY_DN78535_c0_g1_i1.path1	novel.7301	TRINITY_DN25005_c0_g1_i1.path1
TRINITY_DN3664_c0_g3_i1.path1	Pepsico1_Contig2723.path1	TRINITY_DN18448_c0_g1_i2.path3	TRINITY_DN25758_c0_g1_i2.path1
TRINITY_DN6860_c0_g1_i1.path1	Pepsico1_Contig688.path1	novel.4953	novel.5848
TRINITY_DN16311_c0_g1_i3.path1	TRINITY_DN13705_c0_g3_i1.path2	TRINITY_DN88881_c0_g1_i1.path1	TRINITY_DN2210_c0_g1_i2.path1
TRINITY_DN5010_c0_g1_i1.path1	TRINITY_DN29528_c0_g1_i1.path1	Pepsico1_Contig6134.path1	TRINITY_DN16283_c0_g2_i1.path1
Pepsico2_Contig12504.path1	TRINITY_DN648_c1_g1_i8.path2	TRINITY_DN13705_c0_g4_i1.path1	TRINITY_DN6679_c0_g1_i1.path1
TRINITY_DN62260_c0_g1_i1.path1	TRINITY_DN7830_c0_g1_i1.path1	TRINITY_DN15791_c0_g1_i1.path2	TRINITY_DN25055_c0_g1_i1.path1
novel.5783	TRINITY_DN2337_c0_g1_i6.path2	TRINITY_DN13237_c0_g1_i10.path1	TRINITY_DN6025_c0_g1_i12.path1
Pepsico2_Contig15050.path1	novel.10337	Pepsico1_Contig5224.path1	Pepsico1_Contig196.path1
Pepsico2_Contig7839.path2	novel.6580	Pepsico1_Contig896.path1	TRINITY_DN32603_c0_g1_i1.path1
novel.5347	TRINITY_DN11175_c0_g1_i6.path1	TRINITY_DN10325_c0_g2_i1.path2	TRINITY_DN88385_c0_g1_i1.path1
TRINITY_DN1583_c0_g1_i1.path1	Pepsico2_Contig15152.path1	Pepsico2_Contig17730.path1	TRINITY_DN1693_c0_g1_i12.path2
TRINITY_DN3369_c0_g1_i2.path2	TRINITY_DN19377_c0_g1_i3.path1	TRINITY_DN2871_c0_g1_i2.path1	TRINITY_DN21405_c1_g1_i7.path1
TRINITY_DN40941_c1_g1_i1.path1	Pepsico2_Contig3522.path1	TRINITY_DN10389_c0_g1_i1.path1	TRINITY_DN11017_c0_g2_i4.path3
Pepsico2_Contig3516.path1	Pepsico2_Contig7741.path2	novel.2243	TRINITY_DN283_c1_g1_i5.path3
TRINITY_DN71899_c0_g1_i2.path1	TRINITY_DN106523_c0_g1_i1.path1	Pepsico1_Contig31861.path1	TRINITY_DN73289_c0_g1_i1.path1
Pepsico2_Contig12826.path1	Pepsico2_Contig12299.path2	TRINITY_DN12758_c1_g2_i1.path1	TRINITY_DN2067_c0_g1_i1.path1
Pepsico2_Contig7869.path1	TRINITY_DN24030_c0_g1_i1.path1	TRINITY_DN33471_c0_g1_i1.path1	novel.10351
TRINITY_DN12222_c0_g1_i8.path1	Pepsico1_Contig3191.path2	TRINITY_DN40817_c0_g1_i1.path1	novel.1606
TRINITY_DN26096_c0_g1_i4.path1	Pepsico1_Contig1037.path1	TRINITY_DN22897_c0_g1_i1.path1	novel.4631
TRINITY_DN7691_c1_g2_i1.path1	Pepsico2_Contig7277.path1	Pepsico1_Contig6362.path2	TRINITY_DN9674_c0_g3_i1.path1
TRINITY_DN8001_c0_g1_i3.path1	TRINITY_DN40249_c0_g1_i1.path1	Pepsico1_Contig8171.path1	novel.986
novel.6124	Pepsico1_Contig4010.path1	novel.5188	Pepsico2_Contig4539.path1
novel.616	TRINITY_DN43227_c0_g1_i2.path1	TRINITY_DN4502_c0_g2_i1.path1	TRINITY_DN32418_c0_g1_i1.path1
TRINITY_DN73395_c0_g1_i1.path1	TRINITY_DN3543_c2_g1_i1.path1	TRINITY_DN3337_c0_g1_i3.path2	TRINITY_DN13917_c0_g1_i1.path1
Pepsico1_Contig556.path1	TRINITY_DN13657_c0_g1_i2.path1	TRINITY_DN4477_c0_g1_i1.path1	TRINITY_DN83482_c0_g1_i1.path1
Pepsico2_Contig16922.path1	novel.4236	TRINITY_DN8555_c0_g1_i8.path1	TRINITY_DN6470_c2_g1_i3.path2
TRINITY_DN8849_c1_g1_i7.path1	TRINITY_DN14129_c0_g1_i5.path3	TRINITY_DN28715_c0_g1_i1.path1	novel.4082
novel.5375	TRINITY_DN1581_c0_g1_i3.path1	novel.6293	TRINITY_DN41724_c1_g1_i4.path1
TRINITY_DN9952_c0_g1_i1.path1	TRINITY_DN14296_c0_g2_i1.path1	TRINITY_DN9385_c2_g2_i1.path1	novel.6485
TRINITY_DN2021_c0_g1_i1.path1	TRINITY_DN33361_c0_g1_i5.path2	Pepsico1_Contig36864.path1	TRINITY_DN37934_c0_g1_i3.path1
TRINITY_DN65865_c0_g1_i1.path1	Pepsico1_Contig6478.path1	novel.7729	TRINITY_DN18489_c1_g1_i1.path1
Pepsico1_Contig581.path1	TRINITY_DN16572_c0_g1_i1.path1	TRINITY_DN19219_c0_g1_i1.path1	TRINITY_DN19219_c0_g1_i1.path1
novel.8996	Pepsico2_Contig16099.path1	Pepsico1_Contig36864.path2	TRINITY_DN32638_c0_g1_i1.path1
TRINITY_DN28_c0_g2_i1.path1	TRINITY_DN23082_c0_g1_i1.path1	TRINITY_DN7830_c0_g2_i1.path1	TRINITY_DN53169_c0_g1_i1.path1
TRINITY_DN29296_c0_g1_i3.path1	TRINITY_DN25005_c0_g1_i1.path1	Pepsico1_Contig874.path1	TRINITY_DN11175_c0_g2_i1.path1
TRINITY_DN16858_c0_g1_i2.path1	Pepsico2_Contig748.path1	Pepsico1_Contig294.path1	TRINITY_DN39153_c0_g1_i1.path1
Pepsico2_Contig17469.path1	TRINITY_DN2947_c0_g1_i2.path3	TRINITY_DN25186_c0_g1_i1.path1	TRINITY_DN106240_c0_g1_i1.path1
Pepsico1_Contig2271.path2	novel.5416	TRINITY_DN25998_c0_g1_i2.path1	TRINITY_DN16433_c1_g1_i1.path1
Pepsico1_Contig277.path1	TRINITY_DN18117_c0_g1_i3.path3	TRINITY_DN12498_c0_g1_i2.path1	TRINITY_DN48354_c0_g2_i1.path1
novel.8107	Pepsico2_Contig3659.path1	novel.1498	TRINITY_DN11693_c2_g1_i1.path1
novel.2096	novel.3694	TRINITY_DN16151_c0_g5_i1.path1	TRINITY_DN4595_c0_g3_i1.path1
novel.2598	Pepsico1_Contig3978.path1	TRINITY_DN90340_c0_g1_i1.path1	TRINITY_DN31162_c0_g2_i2.path1
TRINITY_DN21050_c0_g1_i1.path1	TRINITY_DN4852_c0_g2_i2.path1	novel.4532	Pepsico1_Contig1247.path1
Pepsico1_Contig3567.path1	Pepsico1_Contig39106.path1	TRINITY_DN62279_c0_g1_i1.path1	TRINITY_DN8283_c0_g1_i1.path1
novel.9333	TRINITY_DN51062_c0_g1_i1.path1	TRINITY_DN53070_c0_g1_i1.path2	Pepsico1_Contig31810.path1
TRINITY_DN17519_c0_g1_i3.path1	TRINITY_DN37508_c0_g2_i1.path1	TRINITY_DN9210_c0_g3_i1.path1	novel.2892
Pepsico1_Contig22394.path1	TRINITY_DN6454_c0_g2_i1.path2	novel.3405	novel.7553
TRINITY_DN36862_c0_g1_i1.path1	TRINITY_DN3065_c0_g1_i2.path1	TRINITY_DN38837_c0_g1_i6.path1	novel.9244
TRINITY_DN18372_c0_g1_i1.path2	TRINITY_DN57133_c0_g1_i1.path1	TRINITY_DN55872_c0_g1_i1.path1	TRINITY_DN13202_c0_g1_i2.path1
novel.6695	TRINITY_DN6774_c0_g1_i3.path1	TRINITY_DN11175_c0_g2_i1.path1	Pepsico2_Contig6534.path1
TRINITY_DN29428_c0_g2_i1.path1	TRINITY_DN85794_c0_g1_i1.path1	novel.7660	novel.3889
TRINITY_DN12417_c0_g2_i1.path1	TRINITY_DN64592_c0_g1_i1.path1	Pepsico2_Contig12666.path1	TRINITY_DN10302_c0_g1_i5.path1
TRINITY_DN8853_c0_g1_i1.path1	TRINITY_DN4360_c2_g1_i3.path2	TRINITY_DN24179_c1_g1_i1.path1	TRINITY_DN13830_c1_g1_i1.path1
TRINITY_DN114484_c0_g1_i1.path1	TRINITY_DN3369_c0_g1_i2.path2	TRINITY_DN8579_c0_g1_i12.path3	TRINITY_DN7744_c0_g2_i1.path1
TRINITY_DN11538_c0_g2_i1.path1	TRINITY_DN102445_c0_g1_i1.path1	TRINITY_DN20722_c0_g1_i1.path1	TRINITY_DN101247_c0_g1_i1.path1
novel.224	TRINITY_DN32977_c0_g2_i1.path1	Pepsico1_Contig16088.path2	Pepsico2_Contig13188.path1
novel.5121	novel.3398	novel.9302	TRINITY_DN35974_c0_g1_i1.path1
Pepsico1_Contig37830.path1	novel.2274	TRINITY_DN76691_c0_g1_i1.path1	TRINITY_DN43475_c0_g1_i1.path2
TRINITY_DN26034_c0_g2_i1.path1	TRINITY_DN85435_c0_g1_i1.path1	novel.986	TRINITY_DN12176_c0_g1_i8.path1
TRINITY_DN23998_c0_g1_i6.path1	novel.5238	Pepsico1_Contig395.path1	TRINITY_DN56218_c0_g1_i1.path1
Pepsico2_Contig7784.path1	novel.7202	TRINITY_DN4289_c0_g7_i1.path1	TRINITY_DN42395_c0_g3_i1.path1
TRINITY_DN14737_c0_g1_i1.path1	TRINITY_DN108097_c0_g1_i1.path1	novel.6657	Pepsico2_Contig18101.path2
TRINITY_DN12705_c1_g1_i3.path1	novel.1138	TRINITY_DN30069_c0_g2_i1.path1	TRINITY_DN26530_c1_g1_i1.path1
TRINITY_DN31212_c0_g1_i1.path1	TRINITY_DN13166_c1_g1_i1.path1	Pepsico1_Contig672.path2	TRINITY_DN79116_c0_g1_i1.path1
Pepsico2_Contig10069.path1	Pepsico1_Contig1158.path1	TRINITY_DN17321_c0_g1_i4.path1	TRINITY_DN8365_c1_g1_i7.path1
novel.9654	TRINITY_DN11817_c0_g1_i1.path1	TRINITY_DN13826_c0_g1_i3.path1	TRINITY_DN36862_c0_g1_i1.path3
novel.9764	Pepsico2_Contig17795.path1	TRINITY_DN102365_c0_g1_i1.path1	novel.4067
Pepsico2_Contig3785.path1	novel.1477	novel.6575	novel.2361
TRINITY_DN9120_c1_g1_i2.path1	TRINITY_DN32968_c0_g1_i1.path1	TRINITY_DN5662_c0_g1_i3.path1	novel.1831
Pepsico2_Contig19530.path1	TRINITY_DN10796_c0_g1_i1.path1	TRINITY_DN581_c4_g1_i3.path1	TRINITY_DN4504_c1_g2_i1.path1
TRINITY_DN30966_c0_g1_i1.path1	TRINITY_DN16244_c0_g1_i2.path1	TRINITY_DN32159_c0_g1_i1.path1	TRINITY_DN26120_c0_g1_i1.path2
TRINITY_DN11511_c0_g3_i2.path1	Pepsico2_Contig18257.path1	Pepsico2_Contig7452.path1	TRINITY_DN20691_c0_g1_i1.path2
novel.2086	TRINITY_DN10389_c0_g1_i1.path1	Pepsico2_Contig17682.path1	TRINITY_DN78066_c0_g1_i1.path1
TRINITY_DN1082_c0_g1_i1.path1	TRINITY_DN7357_c0_g1_i1.path1	novel.5869	TRINITY_DN3703_c0_g1_i4.path1
TRINITY_DN16826_c0_g1_i2.path1	Pepsico1_Contig5519.path2	TRINITY_DN15577_c0_g1_i4.path2	TRINITY_DN29865_c0_g1_i1.path2
TRINITY_DN40672_c0_g1_i1.path2	TRINITY_DN97339_c0_g1_i1.path1	TRINITY_DN101247_c0_g1_i1.path2	TRINITY_DN17397_c0_g1_i2.path1
TRINITY_DN32418_c0_g1_i1.path1	Pepsico2_Contig3845.path1	Pepsico2_Contig8389.path2	TRINITY_DN22425_c0_g1_i1.path1
TRINITY_DN63362_c0_g1_i1.path1	Pepsico1_Contig3978.path2	Pepsico2_Contig20155.path1	Pepsico1_Contig3978.path1
TRINITY_DN10178_c0_g1_i1.path1	TRINITY_DN11511_c0_g3_i2.path1	novel.1138	TRINITY_DN1241_c1_g1_i1.path1
TRINITY_DN14976_c1_g2_i1.path1	novel.4975	TRINITY_DN4852_c0_g2_i2.path1	TRINITY_DN38923_c0_g2_i1.path1
TRINITY_DN3185_c0_g1_i2.path1	TRINITY_DN16373_c0_g2_i1.path1	novel.7080	TRINITY_DN20959_c0_g2_i1.path1
TRINITY_DN41330_c0_g1_i2.path2	TRINITY_DN16421_c0_g1_i9.path3	TRINITY_DN21184_c0_g2_i1.path1	Pepsico1_Contig6270.path2
Pepsico2_Contig2494.path2	TRINITY_DN33471_c0_g1_i1.path1	Pepsico2_Contig15179.path1	TRINITY_DN19377_c0_g1_i3.path1
novel.6297	TRINITY_DN87_c0_g1_i1.path2	TRINITY_DN40225_c0_g1_i1.path2	TRINITY_DN29734_c0_g1_i9.path1
TRINITY_DN16776_c0_g1_i1.path1	novel.6980	TRINITY_DN11509_c0_g1_i7.path1	TRINITY_DN34243_c1_g1_i1.path1
novel.2818	novel.8773	TRINITY_DN7966_c1_g1_i1.path1	novel.9609
TRINITY_DN36478_c0_g1_i3.path1	novel.3512	TRINITY_DN21572_c0_g1_i1.path2	TRINITY_DN17413_c0_g4_i2.path1
TRINITY_DN18448_c0_g1_i2.path2	TRINITY_DN13360_c0_g2_i2.path1	Pepsico2_Contig9996.path1	TRINITY_DN22733_c1_g1_i3.path1
Pepsico2_Contig4967.path1	Pepsico2_Contig10317.path1	Pepsico2_Contig16985.path1	TRINITY_DN18348_c1_g1_i1.path1
Pepsico2_Contig20487.path1	novel.3858	Pepsico2_Contig19467.path2	novel.5338
TRINITY_DN11724_c0_g1_i4.path2	Pepsico2_Contig4732.path1	TRINITY_DN41312_c0_g1_i1.path1	TRINITY_DN100960_c0_g1_i1.path1
TRINITY_DN71809_c0_g1_i1.path1	novel.5012	Pepsico2_Contig1581.path1	Pepsico1_Contig38046.path1
novel.6132	TRINITY_DN109533_c0_g1_i1.path1	Pepsico1_Contig3025.path1	novel.9453
novel.4607	TRINITY_DN16585_c0_g1_i1.path1	novel.2684	TRINITY_DN37827_c0_g1_i1.path3
Pepsico1_Contig3093.path2	TRINITY_DN64057_c0_g1_i1.path1	novel.4372	novel.9497
TRINITY_DN9007_c0_g1_i2.path1	TRINITY_DN310_c1_g1_i3.path1	TRINITY_DN1834_c0_g1_i6.path3	novel.2220
Pepsico2_Contig17242.path1	novel.7989	Pepsico1_Contig3978.path1	TRINITY_DN10802_c0_g1_i1.path1
novel.6583	Pepsico2_Contig752.path1	Pepsico2_Contig8440.path1	Pepsico2_Contig11149.path2
Pepsico1_Contig33364.path2	novel.6930	TRINITY_DN69448_c0_g1_i1.path1	TRINITY_DN66631_c0_g1_i1.path1
TRINITY_DN18491_c0_g1_i3.path1	TRINITY_DN7472_c0_g1_i1.path1	Pepsico1_Contig156.path1	TRINITY_DN19759_c0_g2_i2.path1
novel.125	novel.4542	TRINITY_DN91483_c0_g1_i1.path1	TRINITY_DN40886_c0_g1_i1.path1
Pepsico1_Contig5244.path1	TRINITY_DN16713_c0_g1_i1.path1	Pepsico2_Contig3454.path1	novel.1561
Pepsico1_Contig5050.path2	Pepsico2_Contig1900.path3	TRINITY_DN26262_c0_g1_i1.path1	TRINITY_DN57175_c1_g2_i1.path2
Pepsico1_Contig3010.path1	TRINITY_DN9210_c0_g3_i1.path1	novel.8514	TRINITY_DN33191_c0_g1_i2.path1
Pepsico2_Contig8333.path3	TRINITY_DN11478_c0_g2_i8.path1	TRINITY_DN28129_c0_g1_i1.path1	Pepsico2_Contig1581.path1
TRINITY_DN110160_c0_g1_i1.path1	TRINITY_DN19150_c0_g1_i2.path2	TRINITY_DN11513_c0_g1_i3.path1	novel.9365
TRINITY_DN12897_c0_g1_i1.path3	TRINITY_DN15460_c0_g3_i1.path1	Pepsico1_Contig7855.path1	Pepsico2_Contig3314.path1
TRINITY_DN12375_c0_g2_i1.path2	TRINITY_DN31087_c1_g1_i1.path1	Pepsico2_Contig13090.path1	novel.9181
TRINITY_DN7795_c0_g1_i6.path1	Pepsico2_Contig8.path1	TRINITY_DN22038_c0_g1_i2.path1	Pepsico2_Contig19585.path1
TRINITY_DN23750_c0_g1_i4.path1	TRINITY_DN8830_c0_g1_i19.path3	Pepsico2_Contig16099.path1	Pepsico1_Contig32793.path1
TRINITY_DN3180_c0_g2_i1.path2	TRINITY_DN6633_c0_g1_i5.path1	TRINITY_DN16544_c0_g2_i2.path1	TRINITY_DN99626_c0_g1_i1.path1
TRINITY_DN76737_c0_g1_i1.path1	Pepsico2_Contig1434.path1	Pepsico1_Contig3210.path1	novel.6444
TRINITY_DN25696_c0_g1_i1.path1	novel.6861	TRINITY_DN10389_c0_g1_i1.path2	TRINITY_DN29549_c0_g1_i2.path1
novel.7840	novel.10001	Pepsico1_Contig21250.path1	TRINITY_DN1145_c0_g1_i1.path1
novel.7128	Pepsico2_Contig12802.path1	TRINITY_DN40776_c0_g1_i1.path1	TRINITY_DN57700_c0_g1_i1.path1
TRINITY_DN106160_c0_g1_i1.path1	Pepsico2_Contig19227.path1	TRINITY_DN16421_c0_g1_i9.path1	TRINITY_DN22326_c2_g1_i4.path1
TRINITY_DN2809_c0_g1_i14.path1	TRINITY_DN24554_c0_g1_i1.path2	TRINITY_DN43953_c0_g2_i1.path1	TRINITY_DN17175_c0_g1_i4.path2
novel.7014	TRINITY_DN41659_c0_g1_i1.path2	TRINITY_DN3659_c2_g1_i1.path4	TRINITY_DN9687_c0_g1_i7.path1
TRINITY_DN20944_c0_g1_i5.path1	TRINITY_DN11150_c0_g1_i1.path1	TRINITY_DN16589_c0_g3_i3.path1	Pepsico1_Contig814.path2
TRINITY_DN18904_c0_g1_i1.path2	TRINITY_DN13050_c0_g1_i9.path1	TRINITY_DN24292_c0_g1_i4.path1	TRINITY_DN2993_c1_g1_i1.path1
TRINITY_DN15597_c0_g1_i6.path1	TRINITY_DN15616_c0_g1_i5.path3	Pepsico2_Contig3750.path2	TRINITY_DN94969_c0_g1_i1.path1
TRINITY_DN36019_c2_g1_i1.path2	Pepsico2_Contig638.path1	novel.126	TRINITY_DN60211_c0_g1_i1.path1
Pepsico2_Contig17410.path1	TRINITY_DN40344_c0_g1_i1.path1	TRINITY_DN28026_c0_g1_i1.path1	TRINITY_DN6946_c0_g1_i4.path1
Pepsico2_Contig20778.path1	Pepsico1_Contig1823.path1	TRINITY_DN6877_c0_g1_i1.path1	TRINITY_DN11161_c0_g1_i5.path1
TRINITY_DN14595_c1_g1_i1.path1	novel.8747	Pepsico2_Contig337.path1	novel.10118
novel.10042	TRINITY_DN1928_c0_g1_i7.path1	TRINITY_DN5816_c0_g1_i8.path1	Pepsico1_Contig5731.path1
TRINITY_DN106297_c0_g1_i1.path1	TRINITY_DN29057_c0_g1_i1.path1	Pepsico1_Contig8151.path1	novel.2124
TRINITY_DN3266_c0_g2_i3.path1	Pepsico1_Contig7054.path2	Pepsico2_Contig10102.path2	novel.3041
novel.6566	TRINITY_DN4976_c0_g3_i1.path1	novel.5195	novel.7882
Pepsico2_Contig11464.path2	TRINITY_DN8555_c0_g1_i8.path1	Pepsico2_Contig1589.path1	TRINITY_DN37342_c0_g2_i1.path1
novel.2238	Pepsico2_Contig20580.path1	TRINITY_DN25005_c0_g1_i1.path1	TRINITY_DN8353_c0_g1_i1.path1
TRINITY_DN87855_c0_g1_i1.path1	TRINITY_DN51934_c0_g1_i1.path1	Pepsico2_Contig14412.path3	novel.3593
TRINITY_DN80843_c0_g1_i1.path1	TRINITY_DN26242_c0_g1_i2.path1	TRINITY_DN36881_c1_g1_i1.path1	TRINITY_DN9136_c1_g2_i1.path1
TRINITY_DN16716_c0_g1_i4.path1	novel.4138	TRINITY_DN78849_c0_g1_i1.path1	Pepsico2_Contig1185.path2
Pepsico1_Contig2509.path1	Pepsico2_Contig6644.path1	TRINITY_DN17647_c0_g1_i2.path1	Pepsico1_Contig5358.path1
Pepsico1_Contig847.path1	novel.10258	Pepsico2_Contig135.path1	TRINITY_DN108193_c0_g1_i1.path1
novel.3982	TRINITY_DN62060_c0_g1_i1.path2	novel.8337	novel.8598
Pepsico2_Contig2494.path3	TRINITY_DN37181_c0_g1_i1.path2	Pepsico2_Contig15502.path1	Pepsico2_Contig7175.path1
TRINITY_DN90231_c0_g1_i1.path1	TRINITY_DN33442_c0_g2_i3.path1	TRINITY_DN25100_c0_g2_i2.path1	TRINITY_DN32774_c0_g1_i1.path2
novel.9584	novel.232	TRINITY_DN44023_c0_g1_i4.path1	Pepsico1_Contig5077.path1
novel.5769	TRINITY_DN21405_c1_g1_i7.path1	TRINITY_DN19150_c0_g1_i2.path2	TRINITY_DN36898_c0_g1_i7.path1
Pepsico1_Contig2174.path3	TRINITY_DN9438_c1_g1_i1.path1	TRINITY_DN18185_c0_g1_i6.path1	novel.7176
Pepsico2_Contig4447.path1	TRINITY_DN38578_c0_g4_i1.path2	TRINITY_DN2993_c1_g1_i1.path1	novel.9685
TRINITY_DN23612_c0_g1_i2.path1	Pepsico1_Contig304.path2	novel.8478	Pepsico1_Contig847.path1
TRINITY_DN39085_c0_g4_i1.path1	TRINITY_DN41418_c0_g2_i1.path1	Pepsico1_Contig3021.path1	TRINITY_DN33761_c0_g1_i2.path1
Pepsico2_Contig6438.path1	Pepsico1_Contig35904.path3	Pepsico1_Contig389.path1	Pepsico1_Contig886.path1
TRINITY_DN94754_c0_g1_i1.path1	TRINITY_DN43861_c0_g1_i2.path1	novel.5500	TRINITY_DN14561_c0_g1_i11.path1
TRINITY_DN11598_c0_g1_i1.path1	TRINITY_DN82040_c0_g1_i1.path1	novel.2366	novel.4818
TRINITY_DN8122_c0_g1_i5.path1	TRINITY_DN36977_c1_g1_i1.path1	novel.10229	TRINITY_DN7209_c0_g5_i1.path2
TRINITY_DN5449_c0_g2_i1.path1	Pepsico2_Contig7869.path1	TRINITY_DN24554_c0_g1_i1.path2	TRINITY_DN20865_c0_g1_i2.path1
Pepsico1_Contig20808.path2	TRINITY_DN29809_c0_g2_i2.path1	Pepsico1_Contig3866.path1	novel.8337
Pepsico2_Contig20128.path1	TRINITY_DN50454_c0_g1_i1.path1	TRINITY_DN1879_c0_g1_i2.path2	TRINITY_DN16510_c0_g1_i1.path2
Pepsico1_Contig415.path1	Pepsico2_Contig20745.path1	TRINITY_DN101432_c0_g1_i1.path1	Pepsico1_Contig1382.path1
TRINITY_DN21686_c1_g1_i1.path1	TRINITY_DN31074_c1_g1_i1.path1	TRINITY_DN8996_c0_g1_i3.path2	TRINITY_DN13120_c0_g3_i1.path1
Pepsico2_Contig14153.path1	novel.5499	TRINITY_DN20292_c1_g1_i1.path1	novel.3643
TRINITY_DN19720_c0_g1_i1.path1	TRINITY_DN9896_c0_g1_i7.path1	Pepsico2_Contig2860.path1	Pepsico2_Contig18624.path1
TRINITY_DN23025_c0_g2_i1.path1	TRINITY_DN18610_c0_g2_i1.path1	Pepsico1_Contig3710.path1	TRINITY_DN19946_c0_g1_i1.path1
novel.172	TRINITY_DN27643_c1_g1_i1.path1	TRINITY_DN5001_c0_g2_i3.path1	Pepsico1_Contig6029.path1
novel.7604	Pepsico2_Contig20350.path1	novel.6606	Pepsico1_Contig33658.path1
TRINITY_DN41724_c1_g1_i4.path1	TRINITY_DN14278_c0_g1_i1.path1	Pepsico1_Contig1872.path2	Pepsico1_Contig5881.path2
Pepsico1_Contig521.path1	TRINITY_DN18140_c1_g1_i1.path2	TRINITY_DN38810_c0_g2_i2.path1	TRINITY_DN8794_c0_g2_i3.path1
TRINITY_DN19182_c0_g1_i2.path2	Pepsico2_Contig14707.path1	TRINITY_DN45916_c0_g1_i1.path1	TRINITY_DN12951_c0_g1_i1.path1
novel.9487	novel.8593	novel.1840	TRINITY_DN37187_c1_g1_i1.path1
Pepsico2_Contig8286.path1	Pepsico2_Contig6534.path1	novel.7518	novel.5691
TRINITY_DN83290_c0_g1_i1.path1	TRINITY_DN23706_c0_g1_i1.path1	TRINITY_DN52988_c0_g1_i1.path1	TRINITY_DN27463_c0_g1_i1.path1
TRINITY_DN934_c0_g1_i1.path1	TRINITY_DN1163_c0_g1_i2.path1	Pepsico1_Contig340.path2	novel.7396
Pepsico2_Contig14892.path1	novel.9142	TRINITY_DN44436_c1_g1_i1.path1	TRINITY_DN13184_c0_g1_i3.path1
Pepsico2_Contig19788.path2	TRINITY_DN19447_c0_g1_i1.path2	novel.7051	novel.158
TRINITY_DN12532_c0_g1_i3.path1	Pepsico1_Contig1982.path1	Pepsico2_Contig12156.path1	novel.5337
Pepsico2_Contig10843.path1	TRINITY_DN4289_c0_g2_i1.path1	Pepsico1_Contig2241.path1	TRINITY_DN11724_c0_g1_i4.path2
novel.2036	TRINITY_DN42158_c0_g1_i1.path1	Pepsico1_Contig2081.path1	TRINITY_DN15878_c0_g1_i6.path1
novel.3361	TRINITY_DN21045_c1_g1_i2.path1	TRINITY_DN20966_c0_g5_i1.path1	novel.7034
Pepsico2_Contig14293.path1	TRINITY_DN10738_c0_g2_i1.path2	TRINITY_DN9896_c0_g1_i7.path1	TRINITY_DN15112_c0_g2_i1.path1
TRINITY_DN23159_c1_g1_i1.path1	TRINITY_DN5591_c0_g1_i3.path2	TRINITY_DN8792_c0_g1_i1.path2	TRINITY_DN61192_c0_g1_i1.path1
TRINITY_DN10330_c0_g4_i1.path2	Pepsico2_Contig8440.path1	Pepsico2_Contig16982.path1	novel.4361
Pepsico1_Contig6071.path1	TRINITY_DN11063_c0_g1_i1.path1	TRINITY_DN28549_c0_g1_i1.path2	TRINITY_DN2098_c1_g1_i5.path1
novel.8000	Pepsico1_Contig26918.path1	novel.5523	TRINITY_DN64736_c0_g1_i1.path1
TRINITY_DN21247_c0_g1_i2.path2	TRINITY_DN33690_c0_g1_i6.path1	TRINITY_DN59952_c0_g1_i1.path1	TRINITY_DN14849_c0_g1_i11.path1
novel.10113	Pepsico2_Contig3010.path1	TRINITY_DN19722_c0_g2_i1.path1	novel.4835
TRINITY_DN17775_c0_g2_i1.path1	TRINITY_DN21253_c0_g5_i1.path1	TRINITY_DN33361_c0_g1_i5.path2	TRINITY_DN581_c4_g1_i3.path1
novel.1952	Pepsico1_Contig1271.path2	TRINITY_DN9421_c0_g1_i1.path2	TRINITY_DN12089_c1_g1_i1.path1
TRINITY_DN90723_c0_g1_i1.path1	TRINITY_DN22733_c1_g1_i3.path1	novel.5362	TRINITY_DN21520_c0_g1_i3.path1
TRINITY_DN10277_c0_g1_i1.path1	TRINITY_DN20156_c0_g1_i2.path2	Pepsico2_Contig11254.path1	TRINITY_DN28367_c0_g1_i2.path1
TRINITY_DN27832_c0_g1_i1.path1	TRINITY_DN31978_c0_g1_i1.path3	Pepsico2_Contig20745.path1	TRINITY_DN3493_c0_g1_i3.path1
TRINITY_DN29199_c0_g3_i2.path1	novel.8992	Pepsico2_Contig8026.path1	Pepsico1_Contig33661.path1
Pepsico1_Contig6799.path3	TRINITY_DN20010_c1_g3_i1.path1	novel.3565	TRINITY_DN28511_c1_g2_i1.path1
TRINITY_DN20066_c0_g2_i11.path1	novel.9860	Pepsico1_Contig36744.path1	novel.295
TRINITY_DN25022_c0_g1_i2.path2	novel.8822	Pepsico2_Contig3522.path1	novel.10545
Pepsico1_Contig1632.path1	TRINITY_DN71042_c0_g1_i1.path1	Pepsico2_Contig6486.path1	TRINITY_DN7147_c0_g1_i3.path1
TRINITY_DN17492_c0_g1_i1.path1	Pepsico2_Contig20128.path1	TRINITY_DN37359_c0_g1_i1.path2	TRINITY_DN22120_c0_g1_i4.path1
TRINITY_DN1502_c0_g4_i1.path1	TRINITY_DN23082_c0_g1_i1.path2	TRINITY_DN38122_c0_g1_i1.path1	TRINITY_DN81288_c0_g1_i1.path1
novel.2117	TRINITY_DN15420_c0_g1_i4.path1	novel.9297	novel.73
TRINITY_DN3161_c0_g1_i1.path1	TRINITY_DN16509_c1_g1_i2.path2	Pepsico1_Contig27820.path2	TRINITY_DN27247_c0_g1_i1.path1
novel.5849	TRINITY_DN30879_c0_g1_i4.path1	TRINITY_DN26408_c0_g1_i1.path1	novel.1603
Pepsico2_Contig7659.path1	novel.7891	TRINITY_DN29565_c0_g1_i3.path3	novel.5137
TRINITY_DN2171_c0_g1_i2.path1	novel.2423	novel.9396	TRINITY_DN28872_c0_g1_i2.path1
TRINITY_DN43075_c0_g1_i2.path3	Pepsico2_Contig6233.path1	TRINITY_DN3635_c0_g1_i2.path1	TRINITY_DN22219_c0_g1_i1.path2
Pepsico1_Contig8045.path1	TRINITY_DN10302_c0_g1_i5.path1	novel.8477	TRINITY_DN7466_c0_g1_i7.path1
TRINITY_DN24030_c0_g1_i1.path1	novel.7484	Pepsico2_Contig12412.path1	novel.2818
TRINITY_DN8145_c0_g1_i2.path1	TRINITY_DN49656_c0_g1_i1.path2	TRINITY_DN15616_c0_g1_i5.path3	TRINITY_DN24286_c0_g1_i6.path1
TRINITY_DN111855_c0_g1_i1.path1	novel.5050	novel.7263	Pepsico1_Contig1795.path2
TRINITY_DN49378_c0_g1_i1.path1	Pepsico2_Contig6405.path1	TRINITY_DN21781_c0_g1_i1.path2	novel.5523
Pepsico1_Contig231.path1	novel.1079	TRINITY_DN12951_c0_g1_i1.path1	novel.7642
TRINITY_DN4288_c0_g1_i3.path1	TRINITY_DN10389_c0_g1_i1.path2	novel.5142	Pepsico1_Contig2089.path1
novel.9309	TRINITY_DN49378_c0_g1_i1.path1	TRINITY_DN10752_c0_g1_i1.path2	novel.8024
Pepsico2_Contig2980.path1	novel.8748	novel.2343	TRINITY_DN32159_c0_g1_i1.path1
TRINITY_DN28504_c0_g2_i3.path1	novel.1441	TRINITY_DN7765_c2_g1_i3.path1	TRINITY_DN36019_c1_g1_i1.path2
TRINITY_DN72996_c0_g1_i1.path1	TRINITY_DN76164_c0_g1_i1.path1	novel.9142	TRINITY_DN16295_c0_g1_i1.path2
Pepsico2_Contig12133.path2	TRINITY_DN52375_c0_g1_i2.path1	TRINITY_DN17962_c1_g1_i1.path2	TRINITY_DN38122_c0_g1_i1.path1
TRINITY_DN113966_c0_g1_i1.path1	Pepsico2_Contig16982.path2	TRINITY_DN40521_c0_g1_i2.path1	TRINITY_DN7830_c0_g1_i1.path1
TRINITY_DN14475_c0_g2_i3.path1	novel.10133	TRINITY_DN45793_c0_g1_i1.path1	TRINITY_DN43817_c0_g1_i1.path1
Pepsico2_Contig17856.path2	Pepsico2_Contig12695.path1	TRINITY_DN55546_c0_g1_i1.path1	TRINITY_DN33305_c0_g3_i1.path1
TRINITY_DN8381_c0_g1_i1.path1	Pepsico2_Contig10800.path2	TRINITY_DN15949_c0_g1_i1.path1	TRINITY_DN9887_c0_g3_i1.path2
novel.654	novel.1942	TRINITY_DN19296_c0_g1_i3.path1	TRINITY_DN22038_c0_g1_i2.path1
Pepsico2_Contig648.path1	TRINITY_DN19306_c0_g1_i4.path1	novel.4671	TRINITY_DN5351_c0_g2_i1.path1
Pepsico2_Contig17684.path1	TRINITY_DN108802_c0_g1_i1.path1	TRINITY_DN30388_c0_g1_i1.path1	TRINITY_DN21834_c0_g1_i1.path3
Pepsico1_Contig1950.path1	TRINITY_DN4289_c0_g7_i1.path1	TRINITY_DN33165_c0_g3_i2.path1	Pepsico1_Contig1440.path1
Pepsico2_Contig11255.path1	TRINITY_DN31787_c0_g1_i2.path2	novel.1561	TRINITY_DN21470_c0_g1_i2.path2
Pepsico1_Contig1513.path2	TRINITY_DN20546_c0_g1_i1.path1	TRINITY_DN8484_c0_g4_i1.path1	TRINITY_DN15272_c0_g2_i1.path1
TRINITY_DN29095_c0_g1_i2.path1	TRINITY_DN37380_c0_g3_i1.path1	Pepsico1_Contig1795.path2	TRINITY_DN11351_c0_g1_i7.path1
TRINITY_DN9207_c0_g1_i3.path2	novel.5142	novel.7684	Pepsico2_Contig17149.path2
TRINITY_DN64115_c0_g1_i2.path1	TRINITY_DN28145_c0_g2_i3.path1	novel.3721	novel.2366
novel.1338	TRINITY_DN15249_c0_g1_i5.path1	TRINITY_DN37342_c0_g2_i1.path1	TRINITY_DN63758_c0_g1_i1.path1
Pepsico1_Contig6242.path1	TRINITY_DN16330_c0_g1_i2.path2	novel.3041	TRINITY_DN5350_c0_g1_i3.path2
TRINITY_DN70368_c0_g1_i1.path1	TRINITY_DN28341_c3_g1_i1.path1	novel.6965	novel.2539
Pepsico2_Contig20675.path1	TRINITY_DN27981_c0_g1_i1.path1	Pepsico2_Contig13035.path1	Pepsico1_Contig3025.path1
TRINITY_DN18579_c0_g1_i1.path1	TRINITY_DN15878_c0_g1_i6.path1	TRINITY_DN36259_c0_g1_i1.path1	novel.8937
TRINITY_DN5401_c0_g1_i7.path1	TRINITY_DN57958_c0_g1_i1.path1	novel.4730	novel.2184
Pepsico2_Contig2494.path1	Pepsico1_Contig945.path1	novel.1441	TRINITY_DN21244_c0_g1_i3.path1
TRINITY_DN27219_c0_g1_i7.path1	Pepsico1_Contig5362.path2	Pepsico1_Contig5337.path1	Pepsico1_Contig4225.path1
TRINITY_DN648_c1_g1_i8.path1	Pepsico2_Contig4717.path1	TRINITY_DN10066_c1_g2_i1.path1	novel.5226
[truncated: 14,459 more rows]

## Sheet: DY all DEGs
DY2vsDY1	DY3vsDY1	DY6vsDY1	DY5vsDY1
TRINITY_DN15616_c0_g1_i5.path3	Pepsico2_Contig19859.path1	Pepsico2_Contig19859.path1	Pepsico2_Contig19859.path1
Pepsico2_Contig9477.path1	novel.9665	Pepsico2_Contig9426.path1	TRINITY_DN7630_c0_g1_i1.path3
Pepsico2_Contig19157.path1	Pepsico2_Contig19104.path1	Pepsico2_Contig19157.path1	Pepsico1_Contig3571.path1
Pepsico1_Contig5656.path1	novel.8929	novel.3995	novel.5614
Pepsico1_Contig2013.path1	TRINITY_DN7630_c0_g1_i1.path3	TRINITY_DN7630_c0_g1_i1.path3	Pepsico2_Contig19104.path1
novel.9974	Pepsico2_Contig19245.path1	Pepsico2_Contig20286.path2	novel.1582
TRINITY_DN31771_c0_g3_i1.path1	Pepsico2_Contig19157.path1	novel.5614	Pepsico2_Contig9426.path1
TRINITY_DN10665_c0_g1_i2.path1	TRINITY_DN2180_c0_g1_i3.path1	novel.8929	Pepsico1_Contig882.path1
novel.7004	Pepsico2_Contig9276.path1	novel.7137	Pepsico2_Contig14675.path1
TRINITY_DN8645_c0_g1_i16.path2	Pepsico1_Contig26692.path1	Pepsico1_Contig3571.path1	Pepsico1_Contig2556.path1
TRINITY_DN12381_c0_g2_i1.path1	novel.9974	TRINITY_DN1634_c0_g1_i5.path1	Pepsico2_Contig9276.path1
TRINITY_DN8645_c0_g1_i16.path1	Pepsico2_Contig20286.path2	Pepsico2_Contig9276.path1	TRINITY_DN12917_c0_g1_i1.path1
TRINITY_DN28145_c0_g3_i2.path1	TRINITY_DN15616_c0_g1_i5.path3	TRINITY_DN2180_c0_g1_i3.path1	novel.7137
Pepsico2_Contig2890.path1	Pepsico2_Contig10729.path1	Pepsico1_Contig2556.path1	Pepsico2_Contig11248.path1
novel.4909	Pepsico2_Contig3465.path1	Pepsico1_Contig882.path1	novel.8929
Pepsico1_Contig6170.path1	Pepsico2_Contig9426.path1	novel.1417	Pepsico2_Contig19157.path1
TRINITY_DN33878_c0_g1_i2.path1	novel.2946	Pepsico2_Contig19104.path1	TRINITY_DN1634_c0_g1_i5.path1
Pepsico2_Contig2548.path1	novel.1633	novel.7004	Pepsico2_Contig8789.path1
TRINITY_DN17710_c0_g2_i2.path1	novel.7137	TRINITY_DN15616_c0_g1_i5.path3	Pepsico2_Contig19824.path1
Pepsico2_Contig20286.path2	TRINITY_DN21253_c0_g4_i1.path1	novel.2946	Pepsico2_Contig20286.path2
Pepsico1_Contig92.path1	Pepsico2_Contig19530.path1	novel.9665	novel.2946
TRINITY_DN10545_c0_g1_i3.path1	TRINITY_DN28145_c0_g3_i2.path1	Pepsico2_Contig2548.path1	TRINITY_DN17440_c0_g1_i1.path1
novel.6907	Pepsico1_Contig6170.path1	TRINITY_DN3870_c0_g1_i1.path1	novel.3530
TRINITY_DN14937_c0_g1_i2.path2	TRINITY_DN15274_c0_g2_i5.path1	Pepsico2_Contig20237.path2	TRINITY_DN3393_c0_g1_i2.path1
TRINITY_DN2180_c0_g1_i3.path1	Pepsico2_Contig2890.path1	TRINITY_DN14549_c0_g2_i3.path1	novel.3995
TRINITY_DN21323_c0_g1_i1.path1	Pepsico2_Contig3659.path1	Pepsico2_Contig8789.path1	TRINITY_DN2180_c0_g1_i3.path1
Pepsico2_Contig19530.path1	Pepsico1_Contig3571.path1	Pepsico2_Contig19245.path1	TRINITY_DN14549_c0_g2_i3.path1
novel.4365	TRINITY_DN506_c0_g1_i4.path1	Pepsico2_Contig18037.path1	novel.4347
TRINITY_DN6768_c0_g1_i1.path2	TRINITY_DN506_c0_g1_i4.path2	TRINITY_DN12381_c0_g2_i1.path1	novel.10099
Pepsico2_Contig13651.path1	novel.8054	TRINITY_DN17440_c0_g1_i1.path1	novel.7004
Pepsico2_Contig19104.path1	Pepsico2_Contig8546.path1	Pepsico2_Contig3465.path1	TRINITY_DN60222_c0_g1_i2.path1
TRINITY_DN7472_c0_g1_i1.path1	TRINITY_DN3393_c0_g1_i2.path1	TRINITY_DN506_c0_g1_i4.path2	TRINITY_DN14549_c0_g1_i5.path1
novel.9360	TRINITY_DN12381_c0_g2_i1.path1	Pepsico2_Contig19397.path1	Pepsico1_Contig1269.path1
TRINITY_DN46389_c0_g1_i1.path1	novel.8750	TRINITY_DN8645_c0_g1_i16.path2	TRINITY_DN506_c0_g1_i4.path2
TRINITY_DN9393_c0_g1_i1.path1	TRINITY_DN10665_c0_g1_i2.path1	novel.1582	Pepsico2_Contig2548.path1
novel.4940	Pepsico2_Contig11667.path1	TRINITY_DN3180_c0_g2_i1.path1	Pepsico2_Contig10729.path1
TRINITY_DN7357_c0_g2_i1.path1	Pepsico1_Contig5656.path1	Pepsico2_Contig12144.path1	TRINITY_DN3870_c0_g1_i1.path1
novel.741	TRINITY_DN1122_c0_g2_i1.path1	Pepsico2_Contig20237.path1	TRINITY_DN618_c0_g1_i2.path1
novel.121	Pepsico2_Contig17727.path1	TRINITY_DN14549_c0_g1_i5.path1	TRINITY_DN506_c0_g1_i4.path1
TRINITY_DN4456_c0_g2_i10.path3	Pepsico1_Contig1269.path1	TRINITY_DN506_c0_g1_i4.path1	novel.9577
novel.4252	Pepsico2_Contig19824.path1	TRINITY_DN3180_c0_g2_i1.path2	Pepsico2_Contig20237.path2
Pepsico1_Contig4300.path1	Pepsico2_Contig18053.path1	novel.6907	TRINITY_DN13998_c0_g2_i1.path1
TRINITY_DN18390_c0_g1_i1.path1	Pepsico2_Contig19917.path4	TRINITY_DN41519_c0_g1_i1.path1	TRINITY_DN15616_c0_g1_i5.path3
novel.9665	TRINITY_DN8645_c0_g1_i16.path2	TRINITY_DN12917_c0_g1_i1.path1	Pepsico2_Contig17883.path1
TRINITY_DN9494_c0_g1_i2.path1	Pepsico2_Contig17521.path1	Pepsico2_Contig19669.path2	TRINITY_DN5937_c0_g1_i5.path1
TRINITY_DN6102_c0_g1_i1.path1	novel.7004	TRINITY_DN1040_c0_g1_i1.path1	TRINITY_DN12747_c0_g1_i1.path1
TRINITY_DN17168_c0_g5_i1.path1	TRINITY_DN97784_c0_g1_i1.path1	novel.4714	TRINITY_DN1753_c0_g1_i1.path1
novel.6696	novel.10099	Pepsico1_Contig2899.path1	TRINITY_DN1580_c0_g1_i4.path1
novel.2137	novel.2798	novel.10099	novel.415
novel.4585	novel.6907	TRINITY_DN8645_c0_g1_i16.path1	novel.1189
Pepsico2_Contig3659.path1	TRINITY_DN21343_c0_g1_i4.path2	novel.4347	novel.5207
Pepsico1_Contig4128.path1	TRINITY_DN5816_c0_g1_i8.path1	Pepsico2_Contig17521.path1	Pepsico2_Contig20237.path1
Pepsico1_Contig6110.path1	novel.3399	Pepsico2_Contig17883.path1	TRINITY_DN1196_c0_g1_i1.path1
TRINITY_DN14314_c1_g1_i2.path1	Pepsico2_Contig12144.path1	novel.5207	novel.7602
TRINITY_DN3393_c0_g1_i2.path1	TRINITY_DN8645_c0_g1_i16.path1	Pepsico2_Contig17727.path1	Pepsico1_Contig6901.path2
Pepsico2_Contig12122.path1	Pepsico2_Contig7596.path1	TRINITY_DN1196_c0_g1_i1.path1	novel.9665
novel.8009	Pepsico2_Contig19497.path1	Pepsico2_Contig14675.path1	Pepsico2_Contig18037.path1
novel.9624	TRINITY_DN14549_c0_g1_i5.path1	TRINITY_DN16122_c0_g1_i2.path1	Pepsico2_Contig19669.path2
TRINITY_DN42762_c0_g1_i1.path3	Pepsico2_Contig16947.path2	Pepsico2_Contig3449.path1	Pepsico2_Contig19397.path1
Pepsico2_Contig18037.path1	TRINITY_DN36833_c1_g1_i1.path1	TRINITY_DN60222_c0_g1_i2.path1	novel.1633
TRINITY_DN65_c0_g2_i1.path1	TRINITY_DN21343_c0_g1_i4.path1	TRINITY_DN14314_c1_g1_i2.path1	Pepsico2_Contig8546.path1
TRINITY_DN21706_c0_g1_i3.path2	Pepsico2_Contig16834.path1	novel.8750	novel.2651
TRINITY_DN10665_c0_g1_i2.path2	Pepsico2_Contig4818.path1	Pepsico1_Contig1269.path1	novel.3756
TRINITY_DN17273_c0_g1_i1.path1	TRINITY_DN41519_c0_g1_i1.path1	TRINITY_DN13998_c0_g2_i1.path1	novel.8750
novel.2155	Pepsico2_Contig14182.path1	Pepsico2_Contig19824.path1	Pepsico2_Contig19245.path1
TRINITY_DN49408_c0_g1_i1.path1	TRINITY_DN302_c0_g1_i4.path1	TRINITY_DN4139_c0_g1_i1.path1	Pepsico2_Contig17727.path1
TRINITY_DN7630_c0_g1_i1.path3	novel.9809	TRINITY_DN1387_c0_g1_i2.path1	TRINITY_DN46218_c0_g1_i1.path1
novel.6977	novel.9577	TRINITY_DN106836_c0_g1_i1.path1	TRINITY_DN4139_c0_g1_i1.path1
novel.10002	TRINITY_DN10389_c0_g1_i1.path2	novel.7602	Pepsico2_Contig7596.path1
TRINITY_DN17122_c0_g1_i2.path1	Pepsico2_Contig15269.path1	novel.9577	TRINITY_DN302_c0_g1_i4.path1
novel.3530	TRINITY_DN12207_c0_g1_i1.path1	Pepsico2_Contig19917.path4	Pepsico2_Contig18053.path1
Pepsico2_Contig17958.path1	Pepsico2_Contig2548.path1	novel.1633	Pepsico2_Contig16776.path1
TRINITY_DN4456_c0_g2_i10.path4	novel.2291	Pepsico2_Contig18053.path1	Pepsico1_Contig7353.path1
TRINITY_DN41519_c0_g1_i1.path1	novel.4577	Pepsico2_Contig8546.path1	TRINITY_DN21253_c0_g4_i1.path1
novel.5385	Pepsico2_Contig19114.path1	Pepsico2_Contig8115.path1	Pepsico2_Contig3659.path1
Pepsico2_Contig13209.path1	Pepsico2_Contig3164.path1	Pepsico2_Contig10729.path1	Pepsico2_Contig12144.path1
Pepsico1_Contig4464.path1	TRINITY_DN2455_c1_g1_i5.path1	TRINITY_DN302_c0_g1_i4.path1	Pepsico2_Contig1790.path2
novel.2151	Pepsico2_Contig18037.path1	Pepsico2_Contig3659.path1	TRINITY_DN1040_c0_g1_i1.path1
TRINITY_DN17732_c0_g6_i1.path1	novel.4347	TRINITY_DN21253_c0_g4_i1.path1	Pepsico2_Contig19114.path1
novel.9752	Pepsico2_Contig3449.path1	novel.8249	novel.7767
novel.1374	TRINITY_DN35543_c0_g1_i4.path1	TRINITY_DN47113_c0_g3_i1.path1	TRINITY_DN24768_c0_g2_i1.path1
novel.3033	Pepsico2_Contig17058.path1	TRINITY_DN7356_c0_g1_i8.path1	novel.5717
TRINITY_DN15215_c0_g1_i1.path1	TRINITY_DN16513_c0_g1_i5.path1	novel.7767	Pepsico1_Contig2899.path2
TRINITY_DN771_c0_g1_i2.path1	TRINITY_DN65_c0_g2_i1.path1	TRINITY_DN3393_c0_g1_i2.path1	TRINITY_DN571_c0_g1_i1.path1
TRINITY_DN1543_c0_g1_i1.path2	TRINITY_DN14549_c0_g2_i3.path1	TRINITY_DN2455_c1_g1_i5.path1	TRINITY_DN9897_c0_g1_i1.path1
novel.6924	Pepsico2_Contig4567.path1	Pepsico2_Contig6727.path1	Pepsico2_Contig19917.path4
TRINITY_DN17072_c0_g1_i4.path2	novel.6977	Pepsico2_Contig4818.path1	Pepsico1_Contig1046.path1
Pepsico2_Contig19859.path1	Pepsico2_Contig1180.path1	TRINITY_DN1387_c0_g1_i2.path2	Pepsico2_Contig3304.path1
TRINITY_DN104219_c0_g1_i1.path1	TRINITY_DN11944_c0_g1_i1.path1	Pepsico2_Contig19497.path1	Pepsico2_Contig6727.path1
Pepsico1_Contig1037.path1	Pepsico2_Contig13651.path1	Pepsico1_Contig2899.path2	Pepsico1_Contig2899.path1
novel.3796	novel.4252	TRINITY_DN5937_c0_g1_i5.path1	TRINITY_DN7691_c0_g4_i1.path1
novel.9895	TRINITY_DN1040_c0_g1_i1.path1	novel.7494	novel.3399
novel.6730	TRINITY_DN44824_c0_g1_i1.path4	Pepsico2_Contig19114.path1	Pepsico2_Contig17521.path1
TRINITY_DN100548_c0_g1_i1.path1	novel.5207	TRINITY_DN1753_c0_g1_i1.path1	novel.1417
TRINITY_DN32090_c0_g2_i1.path1	TRINITY_DN106836_c0_g1_i1.path1	novel.7791	TRINITY_DN28145_c0_g3_i2.path1
TRINITY_DN97971_c0_g1_i1.path1	TRINITY_DN45181_c0_g1_i2.path1	TRINITY_DN45181_c0_g1_i2.path1	TRINITY_DN3180_c0_g2_i1.path1
novel.8249	TRINITY_DN306_c0_g1_i5.path1	TRINITY_DN7472_c0_g1_i1.path1	Pepsico2_Contig4818.path1
Pepsico2_Contig19245.path1	novel.6428	Pepsico2_Contig4432.path1	novel.2798
Pepsico2_Contig10729.path1	Pepsico2_Contig16947.path1	Pepsico2_Contig20183.path1	Pepsico2_Contig19530.path1
TRINITY_DN13621_c0_g1_i1.path1	TRINITY_DN14314_c1_g1_i2.path1	novel.1189	TRINITY_DN494_c0_g2_i4.path1
TRINITY_DN17168_c0_g3_i1.path2	TRINITY_DN28145_c0_g2_i3.path1	TRINITY_DN4885_c0_g2_i1.path1	Pepsico2_Contig4567.path1
novel.5418	Pepsico1_Contig15322.path1	Pepsico2_Contig27.path1	TRINITY_DN2455_c1_g1_i5.path1
novel.4436	Pepsico2_Contig5930.path1	novel.4602	Pepsico2_Contig20183.path1
TRINITY_DN496_c0_g1_i1.path1	TRINITY_DN10665_c0_g1_i2.path2	novel.6428	novel.6428
TRINITY_DN1040_c0_g1_i1.path1	TRINITY_DN7472_c0_g1_i1.path1	novel.2798	Pepsico2_Contig2387.path1
novel.1453	novel.8249	Pepsico2_Contig7596.path1	TRINITY_DN11944_c0_g1_i1.path1
Pepsico2_Contig14131.path1	TRINITY_DN2960_c0_g1_i1.path1	Pepsico2_Contig11289.path2	novel.7840
novel.2360	TRINITY_DN13635_c0_g1_i6.path2	novel.8514	Pepsico2_Contig12144.path2
TRINITY_DN4456_c0_g2_i10.path1	Pepsico1_Contig3638.path2	TRINITY_DN46218_c0_g1_i1.path1	Pepsico2_Contig19875.path1
novel.7460	Pepsico2_Contig17946.path1	novel.5533	Pepsico2_Contig13121.path1
TRINITY_DN15274_c0_g2_i5.path1	TRINITY_DN10389_c0_g1_i1.path1	novel.5717	TRINITY_DN16122_c0_g1_i2.path1
TRINITY_DN24782_c0_g1_i1.path2	TRINITY_DN17440_c0_g1_i1.path1	TRINITY_DN10806_c1_g3_i2.path1	novel.5533
TRINITY_DN302_c0_g1_i4.path1	TRINITY_DN310_c1_g1_i3.path1	novel.6977	TRINITY_DN23493_c0_g1_i1.path1
TRINITY_DN48093_c0_g1_i1.path1	TRINITY_DN2173_c0_g2_i1.path1	TRINITY_DN7691_c1_g1_i3.path1	Pepsico2_Contig6259.path1
novel.1633	TRINITY_DN4139_c0_g1_i1.path1	Pepsico2_Contig15269.path1	Pepsico1_Contig1534.path1
Pepsico2_Contig20597.path2	novel.1417	Pepsico2_Contig6259.path1	novel.5230
TRINITY_DN45534_c0_g1_i1.path3	novel.8103	TRINITY_DN15274_c0_g2_i5.path1	novel.1671
TRINITY_DN99656_c0_g1_i1.path1	Pepsico2_Contig6528.path1	novel.9973	Pepsico1_Contig1320.path1
Pepsico2_Contig583.path2	Pepsico2_Contig19875.path1	TRINITY_DN40249_c0_g1_i1.path1	Pepsico1_Contig743.path1
TRINITY_DN34221_c0_g1_i1.path2	novel.1189	TRINITY_DN14443_c0_g2_i4.path1	Pepsico2_Contig14182.path1
novel.6605	TRINITY_DN32553_c0_g1_i1.path1	Pepsico2_Contig20048.path1	TRINITY_DN7691_c0_g5_i1.path1
novel.6613	TRINITY_DN4885_c0_g2_i1.path1	TRINITY_DN23493_c0_g1_i1.path1	Pepsico2_Contig17946.path1
TRINITY_DN70501_c0_g1_i1.path1	TRINITY_DN30939_c0_g1_i2.path1	Pepsico2_Contig19530.path1	novel.4413
TRINITY_DN7271_c0_g1_i3.path1	TRINITY_DN97971_c0_g1_i1.path1	novel.2651	Pepsico2_Contig2890.path1
TRINITY_DN277_c2_g1_i1.path3	novel.9555	Pepsico2_Contig16947.path2	TRINITY_DN40249_c0_g1_i1.path1
TRINITY_DN306_c0_g1_i5.path1	Pepsico2_Contig12144.path2	Pepsico2_Contig13121.path1	TRINITY_DN23079_c0_g1_i1.path1
TRINITY_DN16513_c0_g1_i5.path1	Pepsico2_Contig20237.path2	Pepsico2_Contig1180.path1	Pepsico2_Contig6107.path1
novel.9592	TRINITY_DN3677_c0_g1_i9.path1	Pepsico2_Contig4567.path1	Pepsico2_Contig19497.path1
TRINITY_DN15210_c0_g1_i2.path1	TRINITY_DN4456_c0_g2_i10.path4	novel.9233	TRINITY_DN1387_c0_g1_i2.path1
novel.10099	novel.2448	TRINITY_DN10470_c0_g1_i2.path1	Pepsico2_Contig4966.path2
Pepsico2_Contig19917.path4	TRINITY_DN16585_c0_g1_i1.path1	novel.3399	TRINITY_DN6841_c0_g1_i2.path1
Pepsico2_Contig14131.path2	Pepsico2_Contig16793.path1	novel.7503	TRINITY_DN41323_c0_g1_i2.path1
novel.6686	TRINITY_DN4456_c0_g2_i10.path3	novel.4252	novel.9809
novel.8054	Pepsico2_Contig6727.path1	Pepsico2_Contig5904.path1	TRINITY_DN45181_c0_g1_i2.path1
TRINITY_DN13653_c0_g1_i2.path1	Pepsico2_Contig20048.path1	Pepsico2_Contig2387.path1	Pepsico1_Contig2094.path1
novel.3114	novel.5533	Pepsico1_Contig15322.path1	Pepsico1_Contig2960.path1
Pepsico1_Contig5677.path1	TRINITY_DN43131_c0_g1_i2.path1	novel.1288	novel.7791
Pepsico1_Contig2960.path1	TRINITY_DN23705_c0_g2_i2.path2	novel.5923	novel.3033
TRINITY_DN5976_c0_g1_i12.path2	TRINITY_DN5937_c0_g1_i5.path1	TRINITY_DN12381_c0_g1_i1.path1	Pepsico2_Contig8115.path1
TRINITY_DN22177_c0_g1_i5.path1	novel.2360	TRINITY_DN32553_c0_g1_i1.path1	TRINITY_DN17793_c0_g1_i1.path1
TRINITY_DN74782_c0_g1_i1.path1	Pepsico1_Contig5677.path1	TRINITY_DN29073_c0_g1_i3.path2	TRINITY_DN5220_c0_g1_i1.path1
novel.1981	TRINITY_DN22937_c0_g1_i3.path1	TRINITY_DN59017_c0_g1_i1.path1	Pepsico2_Contig5904.path1
novel.2844	Pepsico2_Contig13724.path2	TRINITY_DN494_c0_g2_i4.path1	novel.9846
novel.6923	novel.5409	Pepsico2_Contig4899.path1	TRINITY_DN4498_c0_g1_i10.path1
TRINITY_DN6846_c1_g1_i1.path1	novel.4317	Pepsico1_Contig6110.path1	novel.6818
TRINITY_DN75757_c0_g1_i1.path1	TRINITY_DN13159_c0_g1_i4.path1	TRINITY_DN10665_c0_g1_i2.path1	novel.7593
novel.1139	TRINITY_DN18723_c0_g1_i1.path2	TRINITY_DN618_c0_g1_i2.path1	TRINITY_DN15338_c0_g1_i1.path1
TRINITY_DN11954_c0_g1_i6.path1	TRINITY_DN12913_c0_g1_i2.path3	Pepsico1_Contig1037.path1	Pepsico2_Contig3449.path1
Pepsico2_Contig19690.path1	TRINITY_DN10612_c0_g1_i14.path1	Pepsico1_Contig1320.path1	TRINITY_DN23273_c0_g1_i2.path1
novel.10124	novel.4608	novel.8054	novel.1288
novel.4577	Pepsico2_Contig3010.path1	TRINITY_DN10302_c0_g1_i5.path1	Pepsico2_Contig17438.path1
Pepsico1_Contig52.path1	Pepsico2_Contig5308.path1	TRINITY_DN13294_c0_g1_i1.path1	novel.8642
TRINITY_DN37205_c0_g1_i2.path1	Pepsico1_Contig4300.path1	TRINITY_DN5401_c0_g1_i7.path1	Pepsico2_Contig12432.path1
novel.9809	Pepsico1_Contig6110.path1	Pepsico2_Contig12144.path2	novel.4450
TRINITY_DN44006_c0_g1_i1.path2	Pepsico1_Contig701.path2	TRINITY_DN2833_c0_g2_i1.path1	TRINITY_DN32553_c0_g1_i1.path1
Pepsico2_Contig15312.path1	Pepsico2_Contig17114.path1	Pepsico1_Contig5677.path1	TRINITY_DN5316_c0_g1_i5.path1
novel.6770	Pepsico2_Contig1759.path2	TRINITY_DN28145_c0_g2_i3.path1	novel.9974
Pepsico1_Contig1941.path1	Pepsico2_Contig19690.path1	Pepsico2_Contig1759.path2	novel.5600
TRINITY_DN4456_c0_g2_i10.path2	Pepsico2_Contig8789.path1	TRINITY_DN44824_c0_g1_i1.path4	TRINITY_DN106836_c0_g1_i1.path1
TRINITY_DN18723_c0_g1_i1.path2	novel.1863	TRINITY_DN24768_c0_g2_i1.path1	TRINITY_DN12548_c0_g1_i3.path2
novel.9720	TRINITY_DN12747_c0_g1_i1.path1	Pepsico1_Contig5029.path1	TRINITY_DN2960_c0_g1_i1.path1
novel.4398	TRINITY_DN9952_c0_g3_i1.path1	novel.329	novel.7494
TRINITY_DN50134_c0_g1_i1.path1	Pepsico2_Contig12412.path1	Pepsico2_Contig2890.path1	TRINITY_DN5401_c0_g1_i7.path1
Pepsico2_Contig11409.path1	TRINITY_DN18091_c0_g1_i1.path1	novel.8359	Pepsico2_Contig19479.path1
TRINITY_DN3180_c0_g2_i1.path2	novel.2855	novel.4354	Pepsico2_Contig16939.path1
novel.8929	Pepsico2_Contig7177.path1	TRINITY_DN35487_c0_g1_i2.path1	TRINITY_DN4812_c0_g2_i2.path1
novel.4344	novel.7494	Pepsico2_Contig16947.path1	Pepsico2_Contig14022.path1
TRINITY_DN60733_c0_g1_i1.path2	Pepsico2_Contig14675.path1	novel.5652	TRINITY_DN12207_c0_g1_i1.path1
TRINITY_DN59017_c0_g1_i1.path1	Pepsico2_Contig19350.path1	novel.9809	novel.2822
novel.7494	TRINITY_DN17530_c0_g1_i1.path3	TRINITY_DN23273_c0_g1_i2.path1	novel.6977
Pepsico1_Contig13941.path1	TRINITY_DN771_c0_g1_i2.path1	novel.4317	TRINITY_DN10806_c1_g3_i2.path1
novel.2855	TRINITY_DN11017_c0_g2_i4.path3	Pepsico2_Contig14533.path1	Pepsico1_Contig97.path1
TRINITY_DN29903_c0_g1_i2.path1	Pepsico2_Contig20393.path1	TRINITY_DN27443_c0_g1_i1.path1	TRINITY_DN3985_c0_g1_i1.path3
novel.10131	TRINITY_DN21016_c0_g1_i1.path1	novel.7593	Pepsico1_Contig35948.path1
TRINITY_DN115202_c0_g1_i1.path1	Pepsico2_Contig3005.path1	TRINITY_DN34245_c0_g1_i1.path1	novel.329
Pepsico2_Contig7605.path1	TRINITY_DN20167_c1_g1_i1.path1	TRINITY_DN8754_c0_g1_i2.path1	Pepsico2_Contig19350.path1
TRINITY_DN47298_c0_g3_i1.path1	TRINITY_DN4288_c0_g1_i3.path1	Pepsico2_Contig19479.path1	TRINITY_DN9136_c0_g1_i2.path1
Pepsico2_Contig19268.path1	novel.4897	TRINITY_DN10035_c0_g1_i1.path1	Pepsico2_Contig17090.path1
TRINITY_DN6606_c0_g1_i1.path2	Pepsico2_Contig7718.path1	Pepsico1_Contig2960.path1	Pepsico2_Contig5930.path1
Pepsico2_Contig14533.path1	Pepsico1_Contig1934.path1	Pepsico2_Contig5930.path1	TRINITY_DN2833_c0_g2_i1.path1
TRINITY_DN44824_c0_g1_i1.path4	Pepsico2_Contig4421.path1	Pepsico2_Contig19875.path1	TRINITY_DN8043_c0_g1_i2.path1
TRINITY_DN13159_c0_g1_i4.path1	novel.9492	TRINITY_DN7691_c0_g1_i1.path1	novel.7646
novel.2828	TRINITY_DN3180_c0_g2_i1.path2	TRINITY_DN2960_c0_g1_i1.path1	TRINITY_DN35487_c0_g1_i2.path1
novel.3301	TRINITY_DN11586_c0_g2_i3.path1	TRINITY_DN7691_c0_g4_i1.path1	TRINITY_DN4523_c1_g1_i1.path1
TRINITY_DN15500_c0_g1_i3.path1	novel.7503	TRINITY_DN306_c0_g1_i5.path1	Pepsico2_Contig4421.path1
TRINITY_DN14237_c1_g1_i1.path1	TRINITY_DN17168_c0_g3_i1.path2	Pepsico1_Contig836.path1	TRINITY_DN754_c0_g1_i2.path1
novel.7602	novel.5407	TRINITY_DN754_c0_g1_i2.path1	TRINITY_DN3677_c0_g1_i9.path1
TRINITY_DN4504_c1_g2_i1.path1	TRINITY_DN23493_c0_g1_i1.path1	TRINITY_DN41323_c0_g1_i2.path1	TRINITY_DN24316_c0_g1_i3.path1
novel.5409	TRINITY_DN1968_c0_g1_i4.path2	TRINITY_DN35543_c0_g1_i4.path1	Pepsico2_Contig4432.path1
TRINITY_DN7335_c0_g1_i7.path1	Pepsico2_Contig12502.path1	novel.587	TRINITY_DN6258_c0_g1_i1.path1
novel.2121	TRINITY_DN31771_c0_g3_i1.path1	novel.5600	TRINITY_DN1454_c0_g1_i1.path1
Pepsico1_Contig4046.path1	novel.1553	TRINITY_DN11944_c0_g1_i1.path1	Pepsico2_Contig20048.path1
Pepsico1_Contig1269.path1	TRINITY_DN4504_c1_g2_i1.path1	TRINITY_DN12548_c0_g1_i3.path2	TRINITY_DN34245_c0_g1_i1.path1
TRINITY_DN7956_c0_g1_i1.path1	Pepsico1_Contig1873.path2	Pepsico2_Contig11059.path1	TRINITY_DN1945_c0_g1_i3.path1
TRINITY_DN24281_c0_g1_i3.path1	Pepsico2_Contig8025.path1	Pepsico2_Contig14182.path1	Pepsico2_Contig20393.path1
Pepsico2_Contig14140.path1	novel.8514	Pepsico2_Contig4421.path1	novel.7949
novel.1175	Pepsico2_Contig16776.path1	TRINITY_DN1105_c0_g1_i2.path1	TRINITY_DN14443_c0_g2_i4.path1
TRINITY_DN6230_c1_g1_i1.path1	Pepsico2_Contig4899.path1	Pepsico2_Contig17946.path1	TRINITY_DN23496_c0_g1_i2.path2
Pepsico2_Contig19350.path1	novel.4450	Pepsico2_Contig17090.path1	novel.8054
TRINITY_DN10888_c0_g1_i3.path1	novel.9360	TRINITY_DN97496_c0_g1_i1.path1	Pepsico2_Contig14533.path1
novel.7540	Pepsico2_Contig17958.path1	TRINITY_DN15282_c0_g1_i1.path1	TRINITY_DN44824_c0_g1_i1.path4
TRINITY_DN20603_c1_g1_i1.path1	novel.10007	novel.3756	TRINITY_DN17812_c0_g1_i4.path2
TRINITY_DN5816_c0_g1_i8.path1	Pepsico2_Contig971.path1	TRINITY_DN72_c1_g1_i2.path1	TRINITY_DN17812_c0_g1_i4.path1
novel.4062	Pepsico2_Contig5904.path1	novel.8125	Pepsico2_Contig14747.path1
novel.3815	Pepsico1_Contig2899.path2	novel.7840	Pepsico2_Contig13099.path1
Pepsico2_Contig20015.path1	TRINITY_DN16286_c0_g1_i4.path1	TRINITY_DN17812_c0_g1_i4.path2	Pepsico2_Contig11059.path1
novel.8211	TRINITY_DN18390_c0_g1_i1.path1	Pepsico2_Contig16776.path1	TRINITY_DN19139_c0_g1_i1.path1
TRINITY_DN56076_c0_g1_i1.path1	TRINITY_DN22425_c0_g1_i1.path1	Pepsico1_Contig35948.path1	TRINITY_DN6150_c0_g1_i3.path1
novel.6107	TRINITY_DN13998_c0_g2_i1.path1	Pepsico2_Contig14991.path2	TRINITY_DN8500_c0_g1_i2.path1
TRINITY_DN5232_c0_g1_i7.path1	novel.82	TRINITY_DN5220_c0_g1_i1.path1	novel.8249
novel.4380	novel.2402	TRINITY_DN20167_c1_g1_i1.path1	Pepsico1_Contig15322.path1
TRINITY_DN39896_c0_g1_i1.path2	TRINITY_DN18161_c0_g1_i10.path1	Pepsico2_Contig17438.path1	TRINITY_DN16176_c0_g1_i3.path1
TRINITY_DN9519_c0_g1_i4.path1	TRINITY_DN606_c0_g1_i1.path1	TRINITY_DN24316_c0_g1_i3.path1	TRINITY_DN72_c1_g1_i2.path1
novel.10227	TRINITY_DN21607_c0_g3_i3.path1	novel.9968	novel.6581
Pepsico2_Contig8556.path2	TRINITY_DN10059_c0_g2_i4.path1	TRINITY_DN12207_c0_g1_i1.path1	TRINITY_DN41519_c0_g1_i1.path1
TRINITY_DN4154_c0_g1_i4.path1	novel.5614	novel.6818	TRINITY_DN5109_c0_g1_i2.path1
TRINITY_DN45181_c0_g1_i2.path1	novel.7540	novel.4413	TRINITY_DN1387_c0_g1_i2.path2
novel.5126	Pepsico2_Contig13209.path1	Pepsico2_Contig13099.path1	Pepsico2_Contig15269.path1
novel.4555	Pepsico2_Contig13099.path1	TRINITY_DN14775_c0_g1_i8.path1	TRINITY_DN14314_c1_g1_i2.path1
novel.1441	TRINITY_DN3180_c0_g2_i1.path1	Pepsico1_Contig6901.path2	Pepsico2_Contig17090.path2
novel.5037	TRINITY_DN16122_c0_g1_i2.path1	novel.7783	Pepsico2_Contig6777.path1
novel.8161	Pepsico1_Contig28824.path2	TRINITY_DN23642_c0_g1_i4.path1	novel.1560
Pepsico2_Contig16941.path1	Pepsico2_Contig11038.path1	TRINITY_DN28145_c0_g3_i2.path1	Pepsico2_Contig783.path1
TRINITY_DN27443_c0_g1_i1.path1	Pepsico2_Contig14558.path1	TRINITY_DN5316_c0_g1_i5.path1	novel.8514
novel.7247	TRINITY_DN7964_c0_g1_i2.path1	TRINITY_DN4498_c0_g1_i10.path1	novel.5407
novel.10230	TRINITY_DN11951_c0_g1_i1.path1	TRINITY_DN8043_c0_g1_i2.path1	novel.732
Pepsico2_Contig17727.path1	TRINITY_DN15500_c0_g1_i3.path1	TRINITY_DN17812_c0_g1_i4.path1	TRINITY_DN47113_c0_g3_i1.path1
TRINITY_DN27062_c0_g1_i1.path1	TRINITY_DN13217_c0_g1_i1.path1	novel.1175	Pepsico1_Contig1024.path1
Pepsico1_Contig1064.path2	TRINITY_DN17502_c0_g1_i2.path1	Pepsico1_Contig6170.path1	Pepsico2_Contig8849.path1
TRINITY_DN11954_c0_g1_i6.path2	Pepsico2_Contig2406.path2	Pepsico1_Contig2142.path1	TRINITY_DN10035_c0_g1_i1.path1
Pepsico1_Contig1479.path1	TRINITY_DN45534_c0_g1_i1.path3	novel.4450	TRINITY_DN17463_c0_g1_i3.path1
novel.7503	TRINITY_DN7915_c0_g2_i2.path1	TRINITY_DN9899_c0_g1_i1.path1	novel.307
TRINITY_DN40927_c0_g1_i3.path1	Pepsico1_Contig2899.path1	novel.5230	TRINITY_DN2173_c0_g2_i1.path1
novel.8124	novel.2690	TRINITY_DN4523_c1_g1_i1.path1	TRINITY_DN5562_c0_g1_i5.path1
TRINITY_DN21253_c0_g4_i1.path1	Pepsico2_Contig8115.path1	TRINITY_DN9897_c0_g1_i1.path1	Pepsico2_Contig17114.path1
TRINITY_DN19855_c0_g2_i1.path1	Pepsico2_Contig20342.path1	TRINITY_DN15500_c0_g1_i3.path1	Pepsico1_Contig3021.path1
TRINITY_DN33707_c0_g1_i5.path1	TRINITY_DN21706_c0_g1_i3.path2	TRINITY_DN10709_c0_g1_i3.path2	novel.5617
novel.1449	Pepsico2_Contig6148.path1	novel.732	TRINITY_DN87711_c0_g1_i1.path1
TRINITY_DN1634_c0_g1_i5.path1	Pepsico2_Contig10648.path1	TRINITY_DN4456_c0_g2_i10.path3	TRINITY_DN6047_c0_g2_i3.path1
TRINITY_DN11328_c0_g1_i1.path1	Pepsico1_Contig47.path1	Pepsico2_Contig14747.path1	novel.9968
novel.7593	Pepsico2_Contig5121.path1	Pepsico2_Contig3164.path1	TRINITY_DN10709_c0_g1_i3.path2
novel.2448	novel.3530	TRINITY_DN13159_c0_g1_i4.path1	novel.785
novel.8514	Pepsico2_Contig18542.path1	TRINITY_DN1580_c0_g1_i4.path1	TRINITY_DN13048_c0_g1_i1.path1
TRINITY_DN12207_c0_g1_i1.path1	TRINITY_DN11985_c0_g1_i1.path2	TRINITY_DN11017_c0_g2_i4.path3	novel.5409
TRINITY_DN81327_c0_g1_i1.path1	Pepsico2_Contig4411.path1	TRINITY_DN11593_c1_g1_i7.path2	novel.4577
TRINITY_DN106711_c0_g1_i1.path1	novel.5643	Pepsico2_Contig783.path1	TRINITY_DN13294_c0_g1_i1.path1
Pepsico2_Contig11667.path1	TRINITY_DN6846_c1_g1_i1.path1	Pepsico2_Contig16834.path1	Pepsico2_Contig791.path1
Pepsico2_Contig18053.path1	Pepsico2_Contig20237.path1	Pepsico2_Contig15323.path1	TRINITY_DN10241_c1_g3_i1.path1
novel.4950	TRINITY_DN9897_c0_g1_i1.path1	Pepsico2_Contig12432.path1	novel.8103
TRINITY_DN18694_c0_g1_i1.path1	TRINITY_DN14443_c0_g2_i4.path1	TRINITY_DN13763_c0_g1_i1.path1	novel.2693
TRINITY_DN9650_c0_g2_i1.path1	Pepsico2_Contig14747.path1	TRINITY_DN4812_c0_g2_i2.path1	Pepsico2_Contig10332.path1
TRINITY_DN20454_c1_g1_i1.path1	novel.741	Pepsico2_Contig6528.path1	TRINITY_DN7356_c0_g1_i8.path1
novel.5207	novel.3756	Pepsico1_Contig7054.path1	TRINITY_DN2385_c0_g1_i1.path2
TRINITY_DN32090_c0_g1_i1.path1	novel.5776	TRINITY_DN5562_c0_g1_i5.path1	TRINITY_DN12040_c0_g1_i15.path1
Pepsico2_Contig8546.path1	novel.1687	Pepsico2_Contig4411.path1	TRINITY_DN8754_c0_g1_i2.path1
TRINITY_DN25872_c0_g1_i1.path2	TRINITY_DN30653_c0_g1_i1.path1	TRINITY_DN8751_c0_g1_i3.path1	novel.8037
TRINITY_DN115019_c0_g1_i1.path2	TRINITY_DN10545_c0_g1_i3.path1	novel.1863	TRINITY_DN17530_c0_g1_i1.path3
TRINITY_DN51801_c0_g3_i2.path1	novel.3013	TRINITY_DN23496_c0_g1_i2.path2	TRINITY_DN5816_c0_g1_i8.path1
Pepsico2_Contig5904.path1	TRINITY_DN50606_c0_g1_i1.path1	novel.5176	Pepsico2_Contig4435.path1
TRINITY_DN19018_c0_g1_i1.path2	TRINITY_DN7469_c0_g1_i1.path1	novel.2291	Pepsico2_Contig17571.path2
Pepsico1_Contig17968.path1	novel.2550	novel.639	Pepsico1_Contig964.path1
TRINITY_DN44006_c0_g1_i1.path1	TRINITY_DN10094_c0_g3_i1.path1	Pepsico2_Contig20393.path1	Pepsico2_Contig3164.path1
Pepsico2_Contig16947.path1	Pepsico2_Contig14825.path1	TRINITY_DN22937_c0_g1_i3.path1	Pepsico1_Contig701.path2
TRINITY_DN11108_c0_g1_i6.path1	novel.8808	Pepsico2_Contig17090.path2	novel.5801
novel.6814	Pepsico2_Contig17438.path1	novel.8642	novel.9233
novel.5781	novel.9624	TRINITY_DN55504_c0_g1_i1.path1	TRINITY_DN27443_c0_g1_i1.path1
TRINITY_DN10612_c0_g1_i14.path1	TRINITY_DN3985_c0_g1_i1.path3	TRINITY_DN9712_c0_g2_i1.path1	Pepsico2_Contig27.path1
TRINITY_DN89619_c0_g1_i1.path1	TRINITY_DN21253_c0_g5_i1.path1	TRINITY_DN8500_c0_g1_i2.path1	Pepsico2_Contig7827.path1
TRINITY_DN62636_c0_g1_i1.path1	TRINITY_DN19139_c0_g1_i1.path1	novel.4440	Pepsico1_Contig3224.path1
Pepsico1_Contig22443.path2	TRINITY_DN9393_c0_g1_i1.path1	novel.5452	Pepsico2_Contig1180.path1
TRINITY_DN7830_c0_g2_i1.path1	TRINITY_DN12381_c0_g1_i1.path1	TRINITY_DN577_c0_g1_i8.path1	Pepsico2_Contig7699.path1
novel.6376	Pepsico2_Contig19818.path1	TRINITY_DN9899_c0_g1_i1.path2	TRINITY_DN7691_c0_g1_i1.path1
TRINITY_DN506_c0_g1_i4.path2	novel.9456	Pepsico2_Contig2134.path1	TRINITY_DN12952_c0_g4_i1.path1
Pepsico2_Contig19596.path1	TRINITY_DN618_c0_g1_i2.path1	Pepsico2_Contig16939.path1	Pepsico2_Contig4411.path1
TRINITY_DN11598_c0_g1_i1.path1	TRINITY_DN17812_c0_g1_i4.path1	TRINITY_DN11586_c0_g2_i3.path1	TRINITY_DN14775_c0_g1_i8.path1
novel.9244	Pepsico1_Contig1064.path2	TRINITY_DN10665_c0_g1_i2.path2	Pepsico2_Contig17849.path1
TRINITY_DN22030_c0_g1_i4.path1	Pepsico2_Contig14932.path1	TRINITY_DN112522_c0_g1_i1.path1	TRINITY_DN6470_c2_g1_i3.path2
Pepsico2_Contig16925.path2	TRINITY_DN78750_c0_g1_i1.path1	Pepsico2_Contig7466.path1	Pepsico2_Contig12625.path1
Pepsico1_Contig4681.path1	novel.6818	TRINITY_DN7469_c0_g1_i1.path1	TRINITY_DN881_c0_g1_i4.path1
TRINITY_DN2960_c0_g1_i1.path1	TRINITY_DN3106_c1_g1_i1.path1	novel.8103	TRINITY_DN7691_c1_g1_i3.path1
Pepsico2_Contig11038.path1	TRINITY_DN1196_c0_g1_i1.path1	novel.7095	Pepsico2_Contig6378.path1
TRINITY_DN63863_c0_g1_i1.path1	Pepsico2_Contig16992.path1	novel.9245	Pepsico2_Contig1842.path1
TRINITY_DN12633_c0_g1_i2.path1	novel.1260	Pepsico2_Contig15364.path1	novel.2466
Pepsico2_Contig748.path1	TRINITY_DN16513_c0_g2_i1.path1	Pepsico1_Contig7353.path1	TRINITY_DN2145_c0_g1_i1.path2
novel.1260	TRINITY_DN4456_c0_g2_i10.path1	TRINITY_DN12747_c0_g1_i1.path1	TRINITY_DN9712_c0_g3_i2.path1
TRINITY_DN5028_c0_g2_i1.path1	TRINITY_DN59017_c0_g1_i1.path1	TRINITY_DN4456_c0_g2_i10.path4	novel.5549
TRINITY_DN16015_c0_g2_i7.path1	TRINITY_DN27443_c0_g1_i1.path1	novel.7646	TRINITY_DN90811_c0_g1_i1.path1
Pepsico2_Contig12412.path1	TRINITY_DN16767_c0_g1_i2.path1	TRINITY_DN87711_c0_g1_i1.path1	novel.651
novel.8091	TRINITY_DN112522_c0_g1_i1.path1	TRINITY_DN5109_c0_g1_i2.path1	Pepsico2_Contig4918.path1
TRINITY_DN15215_c0_g1_i1.path2	TRINITY_DN18488_c0_g1_i1.path1	TRINITY_DN21706_c0_g1_i3.path2	novel.9245
novel.6287	TRINITY_DN29903_c0_g1_i2.path1	Pepsico2_Contig2300.path1	TRINITY_DN9696_c0_g1_i1.path1
TRINITY_DN67948_c0_g1_i1.path1	TRINITY_DN373_c0_g2_i8.path1	TRINITY_DN3106_c1_g1_i1.path1	novel.1803
Pepsico2_Contig9276.path1	Pepsico1_Contig22394.path1	TRINITY_DN13048_c0_g1_i1.path1	TRINITY_DN2292_c0_g2_i1.path3
novel.1553	Pepsico2_Contig14140.path1	TRINITY_DN3677_c0_g1_i9.path1	novel.1627
novel.8790	TRINITY_DN17466_c0_g1_i1.path1	Pepsico1_Contig3638.path2	Pepsico2_Contig14627.path1
novel.3888	TRINITY_DN16303_c0_g1_i4.path1	TRINITY_DN881_c0_g1_i4.path1	novel.4381
TRINITY_DN22425_c0_g1_i1.path1	novel.7767	novel.8153	TRINITY_DN21343_c0_g1_i4.path2
TRINITY_DN50606_c0_g1_i1.path1	TRINITY_DN1634_c0_g1_i5.path1	novel.5407	TRINITY_DN842_c0_g1_i1.path1
TRINITY_DN17168_c0_g4_i1.path1	Pepsico2_Contig12432.path1	TRINITY_DN6150_c0_g1_i3.path1	TRINITY_DN20133_c0_g1_i3.path2
Pepsico2_Contig19818.path1	TRINITY_DN11593_c1_g1_i7.path2	TRINITY_DN43131_c0_g1_i2.path1	TRINITY_DN28452_c0_g1_i8.path1
novel.7516	Pepsico2_Contig7773.path2	TRINITY_DN17530_c0_g1_i1.path3	Pepsico2_Contig3005.path1
novel.2079	Pepsico1_Contig921.path2	TRINITY_DN310_c1_g1_i3.path1	novel.2121
novel.5383	TRINITY_DN19018_c0_g1_i1.path1	TRINITY_DN16150_c0_g1_i1.path1	TRINITY_DN1105_c0_g1_i2.path1
Pepsico1_Contig1236.path1	Pepsico1_Contig4053.path1	novel.6581	Pepsico2_Contig15364.path1
novel.278	novel.10101	Pepsico1_Contig1534.path1	Pepsico2_Contig19708.path1
TRINITY_DN11511_c0_g1_i2.path1	TRINITY_DN8751_c0_g1_i3.path1	TRINITY_DN6258_c0_g1_i1.path1	TRINITY_DN5669_c0_g1_i1.path1
Pepsico2_Contig12841.path2	Pepsico2_Contig14022.path1	TRINITY_DN70178_c0_g1_i1.path1	TRINITY_DN11593_c1_g1_i7.path2
TRINITY_DN16767_c0_g1_i2.path1	TRINITY_DN24768_c0_g2_i1.path1	novel.5549	TRINITY_DN6768_c0_g1_i1.path2
Pepsico2_Contig10618.path1	TRINITY_DN15885_c0_g1_i1.path2	TRINITY_DN38367_c0_g1_i1.path1	Pepsico1_Contig14950.path1
novel.2719	novel.7602	novel.1671	TRINITY_DN4640_c0_g2_i1.path1
TRINITY_DN36154_c0_g1_i3.path1	TRINITY_DN18638_c0_g3_i1.path1	novel.9457	Pepsico2_Contig14932.path1
Pepsico2_Contig1094.path2	TRINITY_DN32487_c0_g1_i2.path1	TRINITY_DN10837_c0_g1_i1.path1	TRINITY_DN53024_c0_g1_i1.path1
Pepsico1_Contig3074.path1	novel.5176	TRINITY_DN3985_c0_g1_i1.path3	novel.5258
Pepsico2_Contig17946.path1	TRINITY_DN10302_c0_g1_i5.path1	Pepsico2_Contig6777.path1	Pepsico2_Contig7773.path2
novel.7592	TRINITY_DN55504_c0_g1_i1.path1	Pepsico1_Contig1873.path2	novel.6613
TRINITY_DN7830_c0_g1_i1.path1	Pepsico2_Contig20128.path1	novel.2193	TRINITY_DN4456_c0_g2_i10.path4
novel.1826	TRINITY_DN11954_c0_g1_i6.path2	TRINITY_DN21343_c0_g1_i4.path1	Pepsico1_Contig2142.path1
TRINITY_DN21607_c0_g3_i3.path1	Pepsico2_Contig9477.path1	novel.2822	TRINITY_DN11593_c1_g1_i7.path1
novel.9857	novel.7646	TRINITY_DN10545_c0_g1_i3.path1	TRINITY_DN6009_c0_g1_i6.path1
novel.9368	novel.8211	TRINITY_DN23079_c0_g1_i1.path1	TRINITY_DN55287_c0_g1_i1.path3
novel.2946	TRINITY_DN13217_c1_g1_i1.path1	TRINITY_DN21656_c0_g1_i1.path2	Pepsico2_Contig17795.path1
TRINITY_DN109564_c0_g1_i1.path1	TRINITY_DN8754_c0_g1_i2.path1	Pepsico2_Contig17114.path1	Pepsico2_Contig8025.path1
novel.230	novel.4398	Pepsico1_Contig2094.path1	Pepsico2_Contig15323.path1
Pepsico2_Contig12144.path1	novel.2193	Pepsico2_Contig13724.path2	TRINITY_DN22937_c0_g1_i3.path1
TRINITY_DN18698_c0_g1_i1.path2	Pepsico2_Contig7175.path1	TRINITY_DN9370_c0_g2_i1.path1	novel.1863
novel.6803	TRINITY_DN9519_c0_g1_i4.path1	novel.6613	Pepsico1_Contig6170.path1
TRINITY_DN35686_c0_g2_i1.path1	TRINITY_DN52025_c0_g2_i1.path1	TRINITY_DN21343_c0_g1_i4.path2	novel.656
Pepsico2_Contig9102.path1	TRINITY_DN74782_c0_g1_i1.path1	TRINITY_DN12040_c0_g1_i15.path1	Pepsico2_Contig16947.path2
TRINITY_DN31093_c0_g2_i2.path2	novel.8732	TRINITY_DN11593_c1_g1_i7.path1	Pepsico1_Contig5029.path1
TRINITY_DN12913_c0_g1_i2.path3	Pepsico2_Contig7605.path1	Pepsico2_Contig13209.path1	TRINITY_DN310_c1_g1_i3.path1
TRINITY_DN30268_c0_g3_i2.path1	Pepsico2_Contig17169.path1	Pepsico2_Contig3010.path1	TRINITY_DN19166_c0_g1_i6.path1
TRINITY_DN30706_c0_g1_i2.path1	Pepsico1_Contig1064.path1	novel.8037	Pepsico2_Contig7656.path1
novel.2226	novel.3143	TRINITY_DN16513_c0_g1_i5.path1	TRINITY_DN23579_c0_g1_i1.path1
TRINITY_DN11897_c0_g1_i1.path2	Pepsico2_Contig15312.path1	TRINITY_DN19759_c0_g1_i2.path1	Pepsico2_Contig17169.path1
novel.8732	TRINITY_DN5976_c0_g1_i12.path2	Pepsico2_Contig14260.path1	TRINITY_DN78422_c0_g1_i2.path1
novel.9281	novel.10131	Pepsico2_Contig2406.path2	TRINITY_DN5056_c0_g1_i2.path1
novel.8940	TRINITY_DN277_c2_g1_i1.path3	Pepsico2_Contig11667.path1	novel.4317
TRINITY_DN48093_c0_g1_i1.path2	TRINITY_DN5076_c0_g1_i5.path1	TRINITY_DN19139_c0_g1_i1.path1	Pepsico1_Contig1873.path2
novel.560	novel.9895	novel.4897	Pepsico2_Contig16834.path1
TRINITY_DN506_c0_g1_i4.path1	TRINITY_DN9402_c0_g1_i1.path1	novel.1785	Pepsico2_Contig6237.path1
TRINITY_DN5319_c0_g1_i1.path2	Pepsico2_Contig7656.path1	Pepsico1_Contig1934.path1	TRINITY_DN23526_c0_g1_i1.path1
TRINITY_DN1105_c0_g1_i2.path1	TRINITY_DN5857_c0_g1_i1.path1	Pepsico1_Contig701.path2	Pepsico2_Contig3520.path1
TRINITY_DN55806_c0_g1_i1.path2	TRINITY_DN28089_c0_g1_i1.path1	novel.8626	novel.7783
TRINITY_DN7514_c0_g1_i3.path2	Pepsico2_Contig14213.path1	Pepsico2_Contig6611.path4	TRINITY_DN15642_c0_g1_i4.path1
TRINITY_DN19759_c0_g1_i2.path1	Pepsico1_Contig2960.path1	TRINITY_DN14607_c0_g1_i1.path1	Pepsico1_Contig7054.path1
TRINITY_DN4288_c0_g1_i3.path1	Pepsico1_Contig2631.path1	TRINITY_DN5199_c0_g2_i1.path2	TRINITY_DN24759_c0_g1_i3.path1
TRINITY_DN108772_c0_g1_i1.path1	Pepsico2_Contig4432.path1	TRINITY_DN28089_c0_g1_i1.path1	TRINITY_DN20837_c0_g1_i1.path2
novel.1661	TRINITY_DN9998_c0_g2_i1.path1	Pepsico2_Contig12502.path1	TRINITY_DN47812_c0_g1_i2.path1
TRINITY_DN21547_c0_g2_i1.path2	novel.4909	novel.9846	novel.8153
TRINITY_DN115019_c0_g1_i1.path3	Pepsico2_Contig17404.path1	TRINITY_DN34195_c0_g1_i2.path1	novel.660
Pepsico1_Contig701.path2	TRINITY_DN43808_c0_g4_i1.path1	TRINITY_DN6841_c0_g1_i2.path1	TRINITY_DN14594_c0_g2_i1.path1
Pepsico2_Contig2197.path2	Pepsico1_Contig4046.path1	TRINITY_DN53024_c0_g1_i1.path1	TRINITY_DN10471_c0_g2_i1.path1
TRINITY_DN84024_c0_g1_i1.path1	TRINITY_DN13776_c0_g1_i3.path1	novel.10007	TRINITY_DN15272_c0_g2_i1.path1
TRINITY_DN8233_c0_g3_i1.path1	TRINITY_DN41323_c0_g1_i2.path1	TRINITY_DN2337_c0_g1_i6.path1	TRINITY_DN53024_c0_g1_i1.path2
novel.6844	TRINITY_DN22584_c0_g2_i1.path1	TRINITY_DN7127_c0_g2_i6.path1	TRINITY_DN1580_c0_g1_i4.path2
novel.9996	novel.5183	TRINITY_DN33691_c0_g1_i1.path2	novel.5042
TRINITY_DN9952_c0_g3_i1.path1	TRINITY_DN15210_c0_g1_i2.path1	Pepsico2_Contig4918.path1	novel.6907
Pepsico2_Contig14292.path1	TRINITY_DN4502_c2_g1_i1.path1	TRINITY_DN2292_c0_g2_i1.path3	TRINITY_DN8148_c0_g1_i1.path1
TRINITY_DN42279_c0_g1_i1.path1	TRINITY_DN11270_c1_g1_i1.path1	TRINITY_DN28452_c0_g1_i8.path1	novel.1576
Pepsico2_Contig14558.path1	novel.9457	Pepsico2_Contig6378.path1	novel.5452
novel.10228	TRINITY_DN14241_c0_g1_i1.path1	Pepsico2_Contig7827.path1	TRINITY_DN8751_c0_g1_i3.path1
Pepsico2_Contig13724.path2	TRINITY_DN9494_c0_g1_i2.path1	TRINITY_DN6768_c0_g1_i1.path2	Pepsico2_Contig779.path1
TRINITY_DN11270_c1_g1_i1.path1	TRINITY_DN1580_c0_g1_i4.path1	Pepsico2_Contig19350.path1	TRINITY_DN14607_c0_g1_i1.path1
Pepsico1_Contig2450.path2	TRINITY_DN28234_c0_g2_i1.path2	Pepsico2_Contig17169.path1	TRINITY_DN55504_c0_g1_i1.path1
Pepsico1_Contig47.path1	TRINITY_DN47812_c0_g1_i2.path1	TRINITY_DN1945_c0_g1_i3.path1	TRINITY_DN21253_c0_g5_i1.path1
TRINITY_DN41090_c0_g1_i2.path2	novel.5230	Pepsico2_Contig4435.path1	TRINITY_DN15274_c0_g2_i5.path1
TRINITY_DN24409_c0_g1_i2.path1	TRINITY_DN60733_c0_g1_i1.path2	Pepsico2_Contig7656.path1	novel.5611
TRINITY_DN8311_c0_g1_i1.path2	Pepsico2_Contig12841.path2	novel.3530	TRINITY_DN14014_c1_g1_i1.path1
TRINITY_DN14238_c1_g1_i1.path1	novel.6249	novel.660	TRINITY_DN20167_c1_g1_i1.path1
TRINITY_DN2455_c1_g1_i5.path1	TRINITY_DN108478_c0_g1_i1.path4	TRINITY_DN7915_c0_g2_i2.path1	novel.616
novel.768	TRINITY_DN10806_c1_g3_i2.path1	novel.2121	TRINITY_DN18904_c0_g1_i1.path2
novel.330	novel.1927	novel.9624	Pepsico1_Contig1514.path1
TRINITY_DN6678_c0_g2_i1.path1	TRINITY_DN7357_c0_g1_i1.path1	TRINITY_DN33307_c0_g1_i2.path1	novel.8619
Pepsico2_Contig2126.path1	Pepsico2_Contig17370.path1	novel.2079	TRINITY_DN14877_c0_g1_i2.path1
Pepsico1_Contig27806.path1	novel.2457	novel.1560	TRINITY_DN10451_c0_g1_i2.path2
Pepsico2_Contig1718.path1	TRINITY_DN4456_c0_g2_i10.path2	TRINITY_DN24481_c0_g1_i3.path1	Pepsico2_Contig7831.path1
novel.2621	TRINITY_DN15240_c0_g1_i3.path1	novel.9397	TRINITY_DN16279_c0_g1_i1.path3
novel.6547	novel.3473	Pepsico2_Contig14022.path1	TRINITY_DN14296_c0_g2_i1.path1
novel.8087	Pepsico2_Contig4435.path1	Pepsico2_Contig14932.path1	Pepsico2_Contig13004.path1
TRINITY_DN90717_c0_g1_i1.path1	TRINITY_DN8648_c0_g1_i4.path2	TRINITY_DN3567_c0_g2_i2.path1	TRINITY_DN3180_c0_g2_i1.path2
TRINITY_DN27112_c0_g3_i3.path1	novel.2454	TRINITY_DN17463_c0_g1_i3.path1	TRINITY_DN4885_c0_g2_i1.path1
TRINITY_DN43131_c0_g1_i2.path1	novel.1396	TRINITY_DN23526_c0_g1_i1.path1	TRINITY_DN9712_c0_g2_i1.path1
Pepsico1_Contig7353.path1	novel.656	Pepsico2_Contig17849.path1	TRINITY_DN34243_c1_g1_i1.path1
novel.10026	TRINITY_DN5220_c0_g1_i1.path1	TRINITY_DN22284_c0_g2_i1.path1	Pepsico2_Contig10148.path1
novel.1962	TRINITY_DN8122_c0_g1_i5.path1	novel.2693	TRINITY_DN320_c2_g1_i1.path2
Pepsico1_Contig1120.path1	TRINITY_DN10853_c0_g1_i1.path1	Pepsico2_Contig7831.path1	TRINITY_DN10605_c0_g1_i2.path1
novel.8067	novel.2121	Pepsico2_Contig3005.path1	TRINITY_DN10286_c0_g1_i2.path1
Pepsico2_Contig16992.path1	Pepsico2_Contig748.path1	novel.9360	TRINITY_DN1928_c0_g1_i7.path1
novel.5176	Pepsico2_Contig7839.path1	TRINITY_DN3543_c0_g3_i1.path1	TRINITY_DN28145_c0_g2_i3.path1
novel.10232	TRINITY_DN12254_c0_g1_i1.path1	Pepsico1_Contig4053.path1	TRINITY_DN12548_c0_g1_i3.path1
novel.8941	TRINITY_DN13294_c0_g1_i1.path1	Pepsico1_Contig5656.path1	novel.8181
TRINITY_DN15642_c0_g1_i4.path1	TRINITY_DN10826_c0_g1_i2.path1	TRINITY_DN10605_c0_g1_i2.path1	TRINITY_DN7472_c0_g1_i1.path1
TRINITY_DN61900_c0_g2_i1.path1	TRINITY_DN32587_c0_g1_i1.path1	novel.656	novel.3593
Pepsico2_Contig5121.path1	Pepsico2_Contig8794.path2	TRINITY_DN7146_c0_g1_i2.path3	novel.1396
TRINITY_DN107810_c0_g1_i1.path2	TRINITY_DN6102_c0_g1_i1.path1	novel.2138	novel.6260
novel.6418	novel.5037	Pepsico2_Contig16793.path1	TRINITY_DN17793_c0_g3_i2.path1
TRINITY_DN11600_c0_g1_i1.path1	TRINITY_DN14356_c1_g1_i10.path2	Pepsico2_Contig7773.path2	novel.2098
novel.10101	TRINITY_DN100548_c0_g1_i1.path1	TRINITY_DN14975_c0_g1_i4.path1	Pepsico2_Contig17682.path1
Pepsico2_Contig12058.path1	TRINITY_DN24567_c0_g2_i1.path1	novel.5310	TRINITY_DN3567_c0_g2_i2.path1
TRINITY_DN58060_c0_g1_i1.path1	novel.5925	TRINITY_DN5876_c1_g1_i1.path1	novel.9456
novel.4637	novel.4413	TRINITY_DN15210_c0_g1_i2.path1	novel.1050
novel.3995	TRINITY_DN23496_c0_g1_i2.path2	TRINITY_DN12952_c0_g4_i1.path1	novel.4608
Pepsico2_Contig8025.path1	Pepsico1_Contig6738.path1	TRINITY_DN4288_c0_g1_i3.path1	TRINITY_DN32288_c0_g3_i1.path1
TRINITY_DN6421_c0_g1_i4.path1	TRINITY_DN14775_c0_g1_i8.path1	TRINITY_DN47812_c0_g1_i2.path1	TRINITY_DN70178_c0_g1_i1.path1
TRINITY_DN30417_c0_g1_i2.path1	Pepsico1_Contig1725.path1	novel.8257	novel.4062
novel.9456	Pepsico2_Contig2406.path1	TRINITY_DN11951_c0_g1_i1.path1	Pepsico2_Contig6148.path1
TRINITY_DN32487_c0_g1_i2.path1	novel.7840	Pepsico2_Contig17795.path1	TRINITY_DN306_c0_g1_i5.path1
TRINITY_DN55825_c0_g1_i1.path1	TRINITY_DN3360_c0_g1_i5.path1	novel.2690	TRINITY_DN40419_c0_g1_i1.path1
TRINITY_DN7516_c0_g1_i1.path1	TRINITY_DN10470_c0_g1_i2.path1	novel.9609	novel.9244
TRINITY_DN46317_c0_g1_i1.path2	novel.10232	Pepsico2_Contig3785.path2	TRINITY_DN2337_c0_g1_i6.path1
Pepsico1_Contig15322.path1	TRINITY_DN67035_c0_g1_i1.path1	TRINITY_DN19341_c0_g1_i1.path1	TRINITY_DN13217_c1_g1_i1.path1
TRINITY_DN3027_c0_g1_i4.path1	novel.5781	Pepsico2_Contig19690.path1	TRINITY_DN26096_c0_g1_i4.path1
TRINITY_DN16758_c0_g1_i1.path1	Pepsico2_Contig11059.path1	Pepsico1_Contig26692.path1	TRINITY_DN7127_c0_g2_i6.path1
Pepsico2_Contig3304.path1	novel.7783	Pepsico1_Contig2258.path1	Pepsico2_Contig9970.path1
Pepsico2_Contig19977.path2	Pepsico2_Contig13724.path1	Pepsico2_Contig5071.path1	Pepsico1_Contig3638.path2
TRINITY_DN5609_c0_g1_i1.path2	Pepsico2_Contig13865.path1	Pepsico2_Contig6148.path1	TRINITY_DN4504_c1_g2_i1.path1
novel.7646	Pepsico2_Contig4539.path1	novel.2782	Pepsico2_Contig17067.path1
novel.4717	TRINITY_DN452_c0_g1_i2.path1	TRINITY_DN10451_c0_g1_i2.path2	Pepsico2_Contig16947.path1
TRINITY_DN100672_c0_g1_i1.path1	TRINITY_DN6768_c0_g1_i1.path2	Pepsico2_Contig20342.path1	TRINITY_DN9899_c0_g1_i1.path2
TRINITY_DN15240_c0_g1_i3.path1	TRINITY_DN18372_c0_g1_i1.path1	TRINITY_DN19250_c0_g1_i1.path1	TRINITY_DN236_c0_g1_i2.path1
novel.4608	TRINITY_DN27339_c0_g1_i1.path1	TRINITY_DN1968_c0_g1_i4.path2	novel.829
TRINITY_DN11198_c0_g1_i5.path1	TRINITY_DN62636_c0_g1_i1.path1	novel.1962	TRINITY_DN9899_c0_g1_i1.path1
TRINITY_DN2743_c0_g1_i31.path1	novel.8756	novel.6260	Pepsico2_Contig18112.path1
TRINITY_DN127_c0_g1_i2.path1	novel.1622	TRINITY_DN4456_c0_g2_i10.path1	TRINITY_DN25070_c0_g1_i1.path2
Pepsico1_Contig4996.path1	novel.9973	Pepsico2_Contig14558.path1	TRINITY_DN21506_c0_g1_i1.path1
novel.1402	novel.2226	TRINITY_DN10059_c0_g2_i4.path1	TRINITY_DN452_c0_g1_i2.path1
Pepsico1_Contig37404.path1	TRINITY_DN11349_c0_g1_i2.path2	TRINITY_DN10286_c0_g1_i2.path1	Pepsico1_Contig836.path1
Pepsico2_Contig19397.path1	TRINITY_DN2761_c0_g2_i3.path1	Pepsico1_Contig3093.path2	Pepsico2_Contig13844.path1
novel.5489	novel.8112	novel.2762	Pepsico2_Contig17370.path1
TRINITY_DN100983_c0_g1_i1.path1	Pepsico1_Contig4128.path1	TRINITY_DN3360_c0_g1_i5.path1	Pepsico1_Contig538.path1
novel.4610	TRINITY_DN12547_c0_g1_i1.path1	TRINITY_DN53024_c0_g1_i1.path2	novel.2929
TRINITY_DN16303_c0_g1_i4.path1	TRINITY_DN27335_c0_g1_i1.path1	TRINITY_DN26096_c0_g1_i4.path1	TRINITY_DN4506_c0_g1_i2.path1
Pepsico2_Contig20128.path1	Pepsico2_Contig583.path2	novel.1687	Pepsico2_Contig17563.path2
TRINITY_DN78422_c0_g1_i2.path1	novel.7067	Pepsico2_Contig15237.path1	TRINITY_DN30636_c0_g1_i3.path1
Pepsico2_Contig1180.path1	TRINITY_DN4523_c1_g1_i1.path1	TRINITY_DN18488_c0_g1_i1.path1	TRINITY_DN39335_c0_g1_i1.path2
novel.3007	TRINITY_DN99452_c0_g1_i1.path1	Pepsico2_Contig1744.path2	TRINITY_DN652_c0_g1_i1.path1
TRINITY_DN3156_c0_g1_i5.path3	TRINITY_DN14937_c0_g1_i2.path2	Pepsico1_Contig28355.path1	TRINITY_DN38367_c0_g1_i1.path1
TRINITY_DN26453_c0_g2_i5.path2	Pepsico2_Contig13792.path1	novel.2466	Pepsico1_Contig6934.path1
TRINITY_DN34430_c0_g3_i1.path1	Pepsico2_Contig19397.path1	Pepsico1_Contig1271.path1	TRINITY_DN3634_c0_g1_i4.path2
TRINITY_DN79263_c0_g1_i1.path1	TRINITY_DN17168_c0_g5_i1.path1	TRINITY_DN25186_c0_g1_i1.path1	Pepsico1_Contig1934.path1
TRINITY_DN12747_c0_g1_i1.path1	novel.9736	TRINITY_DN18091_c0_g1_i1.path1	TRINITY_DN10451_c0_g1_i2.path1
TRINITY_DN56186_c0_g1_i1.path1	TRINITY_DN3870_c0_g1_i1.path1	Pepsico2_Contig17370.path1	TRINITY_DN14321_c0_g1_i1.path1
TRINITY_DN2467_c0_g1_i3.path1	novel.2183	TRINITY_DN101169_c0_g1_i1.path1	Pepsico1_Contig7564.path1
Pepsico2_Contig14330.path1	novel.5209	novel.2454	novel.4897
Pepsico2_Contig11083.path1	TRINITY_DN21323_c0_g1_i1.path1	TRINITY_DN2173_c0_g2_i1.path1	TRINITY_DN5199_c0_g2_i1.path2
novel.3345	TRINITY_DN13653_c0_g1_i2.path1	TRINITY_DN3197_c0_g2_i1.path1	novel.1687
novel.1475	TRINITY_DN2365_c0_g1_i15.path2	novel.6254	Pepsico2_Contig4899.path1
novel.9768	TRINITY_DN27112_c0_g3_i3.path1	TRINITY_DN13622_c0_g3_i1.path1	novel.6605
novel.3298	TRINITY_DN14877_c0_g1_i2.path1	TRINITY_DN16045_c1_g1_i4.path1	Pepsico2_Contig14991.path1
novel.1955	TRINITY_DN4360_c2_g1_i3.path2	TRINITY_DN14014_c1_g1_i1.path1	TRINITY_DN25186_c0_g1_i1.path1
TRINITY_DN111593_c0_g1_i1.path1	Pepsico2_Contig20183.path1	novel.9492	novel.6394
TRINITY_DN10470_c0_g1_i2.path1	Pepsico1_Contig239.path1	Pepsico2_Contig14627.path1	TRINITY_DN27605_c0_g1_i2.path1
Pepsico1_Contig52.path2	TRINITY_DN8148_c0_g1_i1.path1	TRINITY_DN97784_c0_g1_i1.path1	novel.10007
TRINITY_DN21593_c1_g1_i1.path1	Pepsico2_Contig18011.path1	TRINITY_DN10094_c0_g3_i1.path1	TRINITY_DN12_c0_g2_i1.path1
novel.4347	TRINITY_DN21428_c0_g1_i3.path1	TRINITY_DN6817_c0_g2_i1.path1	TRINITY_DN16373_c0_g2_i1.path1
TRINITY_DN21016_c0_g1_i1.path1	novel.2719	novel.3002	Pepsico2_Contig7177.path1
novel.10120	novel.10016	Pepsico1_Contig4939.path2	TRINITY_DN10302_c0_g1_i5.path1
novel.583	Pepsico2_Contig15323.path1	Pepsico2_Contig11035.path1	novel.6711
TRINITY_DN3843_c0_g1_i1.path1	TRINITY_DN5401_c0_g1_i7.path1	TRINITY_DN13858_c0_g2_i1.path1	TRINITY_DN15272_c0_g3_i1.path1
novel.7597	TRINITY_DN7335_c0_g1_i7.path1	Pepsico2_Contig3785.path1	TRINITY_DN13294_c1_g1_i1.path1
Pepsico2_Contig8430.path1	TRINITY_DN56186_c0_g1_i1.path2	TRINITY_DN10471_c0_g3_i1.path1	TRINITY_DN27643_c0_g1_i3.path2
Pepsico2_Contig9426.path1	TRINITY_DN19092_c0_g1_i1.path1	TRINITY_DN4502_c0_g2_i1.path1	Pepsico1_Contig5656.path1
novel.2712	TRINITY_DN35046_c0_g2_i1.path1	TRINITY_DN10190_c0_g1_i5.path1	TRINITY_DN5968_c0_g1_i3.path1
Pepsico1_Contig1649.path1	TRINITY_DN13048_c0_g1_i1.path1	Pepsico2_Contig7839.path1	novel.4714
novel.239	TRINITY_DN21245_c0_g1_i1.path1	TRINITY_DN90811_c0_g1_i1.path1	novel.7729
novel.2670	Pepsico2_Contig2134.path1	Pepsico2_Contig9370.path1	TRINITY_DN14533_c0_g1_i4.path1
TRINITY_DN96608_c0_g1_i1.path1	TRINITY_DN52160_c0_g1_i1.path1	Pepsico1_Contig5984.path1	novel.2550
Pepsico2_Contig7372.path1	TRINITY_DN75757_c0_g1_i1.path1	TRINITY_DN19341_c0_g1_i1.path2	TRINITY_DN11005_c1_g1_i2.path1
Pepsico1_Contig26692.path1	TRINITY_DN11760_c0_g1_i2.path1	novel.8145	TRINITY_DN14975_c0_g1_i4.path1
novel.1946	novel.5600	TRINITY_DN3271_c0_g1_i4.path3	TRINITY_DN10738_c0_g1_i1.path1
TRINITY_DN34220_c0_g1_i1.path2	Pepsico2_Contig6161.path1	novel.785	Pepsico2_Contig13724.path2
Pepsico2_Contig13865.path1	novel.5617	novel.5258	TRINITY_DN4975_c0_g1_i3.path2
novel.8939	novel.8160	TRINITY_DN40419_c0_g1_i1.path1	TRINITY_DN10709_c0_g1_i3.path1
TRINITY_DN22219_c0_g1_i1.path1	TRINITY_DN66437_c0_g1_i1.path1	TRINITY_DN4502_c2_g1_i1.path1	TRINITY_DN5857_c0_g1_i1.path1
TRINITY_DN17466_c0_g1_i1.path1	TRINITY_DN15215_c0_g1_i1.path1	TRINITY_DN15407_c0_g1_i3.path1	TRINITY_DN24481_c0_g1_i3.path1
novel.1187	TRINITY_DN55197_c0_g1_i1.path1	TRINITY_DN9519_c0_g1_i4.path1	TRINITY_DN21656_c0_g1_i1.path2
TRINITY_DN2173_c0_g2_i1.path1	TRINITY_DN31113_c0_g2_i2.path1	TRINITY_DN648_c1_g1_i8.path1	Pepsico1_Contig26692.path1
TRINITY_DN10389_c0_g1_i1.path2	TRINITY_DN6082_c0_g2_i1.path1	Pepsico2_Contig6456.path1	Pepsico2_Contig7514.path1
Pepsico2_Contig12399.path1	TRINITY_DN7271_c0_g1_i3.path1	Pepsico2_Contig14991.path1	novel.8144
Pepsico1_Contig28824.path2	novel.4344	Pepsico2_Contig7175.path1	TRINITY_DN10059_c0_g2_i4.path1
TRINITY_DN14296_c0_g1_i1.path1	Pepsico1_Contig92.path1	TRINITY_DN24567_c0_g2_i1.path1	Pepsico2_Contig2300.path1
novel.5183	TRINITY_DN72271_c0_g1_i1.path1	Pepsico1_Contig28290.path1	TRINITY_DN112522_c0_g1_i1.path1
TRINITY_DN23649_c0_g1_i2.path2	TRINITY_DN70501_c0_g1_i1.path1	novel.9321	novel.7508
Pepsico2_Contig7718.path1	TRINITY_DN494_c0_g2_i4.path1	TRINITY_DN6909_c0_g1_i6.path1	TRINITY_DN4456_c0_g2_i10.path3
TRINITY_DN79265_c0_g1_i1.path1	novel.1630	novel.1622	novel.9397
Pepsico1_Contig7054.path1	TRINITY_DN10738_c0_g1_i1.path1	novel.5409	TRINITY_DN648_c1_g1_i8.path1
TRINITY_DN17168_c0_g3_i1.path1	Pepsico2_Contig19479.path1	Pepsico1_Contig239.path1	Pepsico1_Contig2723.path1
TRINITY_DN28145_c0_g2_i3.path1	TRINITY_DN22584_c0_g3_i1.path1	TRINITY_DN23705_c0_g2_i2.path2	novel.6814
novel.1046	Pepsico2_Contig12625.path1	Pepsico1_Contig1393.path1	Pepsico1_Contig28824.path2
Pepsico2_Contig1298.path1	novel.6107	Pepsico2_Contig17986.path1	novel.7503
TRINITY_DN69101_c0_g1_i1.path1	Pepsico2_Contig2029.path1	TRINITY_DN28154_c0_g1_i4.path1	TRINITY_DN11902_c0_g2_i2.path1
TRINITY_DN91660_c0_g1_i1.path1	Pepsico2_Contig4663.path1	novel.2137	Pepsico2_Contig6288.path1
novel.5156	TRINITY_DN34430_c0_g3_i1.path1	novel.3753	TRINITY_DN21428_c0_g1_i3.path1
TRINITY_DN2173_c0_g1_i1.path1	novel.5640	Pepsico1_Contig1793.path1	TRINITY_DN61085_c0_g1_i1.path1
TRINITY_DN13048_c0_g1_i1.path1	Pepsico2_Contig7439.path1	TRINITY_DN13776_c0_g1_i3.path1	TRINITY_DN7915_c0_g2_i2.path1
novel.4036	Pepsico1_Contig1543.path1	novel.1396	Pepsico2_Contig12412.path1
TRINITY_DN40003_c0_g1_i1.path1	TRINITY_DN24444_c0_g1_i1.path1	TRINITY_DN7335_c0_g1_i7.path1	Pepsico2_Contig6456.path1
novel.1958	TRINITY_DN15642_c0_g1_i4.path1	TRINITY_DN5351_c0_g2_i1.path1	novel.5652
TRINITY_DN51903_c0_g1_i1.path2	Pepsico1_Contig2013.path1	novel.5925	TRINITY_DN24782_c0_g1_i1.path2
TRINITY_DN24342_c0_g2_i1.path1	novel.3033	novel.3593	novel.9555
novel.9060	novel.6260	TRINITY_DN55806_c0_g1_i1.path1	TRINITY_DN9370_c0_g2_i1.path1
TRINITY_DN8148_c0_g1_i1.path1	Pepsico2_Contig6534.path2	Pepsico2_Contig12412.path1	novel.2690
novel.1165	TRINITY_DN52025_c0_g1_i2.path1	novel.829	TRINITY_DN10389_c0_g1_i1.path1
TRINITY_DN1201_c0_g1_i3.path1	Pepsico2_Contig2197.path1	TRINITY_DN12_c0_g2_i1.path1	TRINITY_DN16373_c0_g1_i1.path1
Pepsico2_Contig5547.path1	TRINITY_DN31093_c0_g2_i2.path2	novel.8499	novel.4602
Pepsico2_Contig17986.path1	TRINITY_DN1968_c0_g1_i4.path1	novel.8619	Pepsico2_Contig15498.path1
TRINITY_DN19087_c0_g1_i3.path1	TRINITY_DN109564_c0_g1_i1.path1	novel.1495	novel.4652
TRINITY_DN16351_c0_g1_i2.path1	novel.8257	TRINITY_DN48822_c0_g1_i2.path1	novel.9913
TRINITY_DN31467_c1_g2_i2.path2	TRINITY_DN10888_c0_g1_i3.path1	Pepsico2_Contig2460.path1	TRINITY_DN25015_c0_g1_i1.path1
Pepsico2_Contig10427.path1	Pepsico2_Contig8430.path1	TRINITY_DN12913_c0_g1_i2.path3	Pepsico2_Contig18542.path1
TRINITY_DN43677_c0_g2_i2.path1	novel.6814	TRINITY_DN1459_c0_g2_i3.path1	novel.4440
TRINITY_DN30194_c0_g1_i5.path1	TRINITY_DN46389_c0_g1_i1.path1	Pepsico2_Contig18269.path1	TRINITY_DN17273_c0_g1_i1.path1
Pepsico2_Contig2406.path2	TRINITY_DN12913_c0_g1_i2.path2	TRINITY_DN88045_c0_g1_i1.path1	Pepsico2_Contig11928.path1
novel.2404	novel.8941	TRINITY_DN373_c0_g2_i8.path1	TRINITY_DN4456_c0_g2_i10.path1
Pepsico2_Contig14707.path1	Pepsico2_Contig6250.path1	novel.1553	TRINITY_DN14594_c0_g1_i1.path2
novel.7594	TRINITY_DN2337_c0_g2_i1.path1	TRINITY_DN13217_c1_g1_i1.path1	TRINITY_DN9519_c0_g1_i4.path1
TRINITY_DN22584_c0_g2_i1.path1	TRINITY_DN7656_c0_g1_i1.path3	TRINITY_DN4139_c0_g2_i1.path1	TRINITY_DN7271_c0_g1_i3.path1
novel.7468	TRINITY_DN62636_c0_g1_i1.path2	novel.10232	TRINITY_DN43686_c0_g1_i1.path1
TRINITY_DN18091_c0_g1_i1.path1	Pepsico2_Contig1094.path2	Pepsico2_Contig14707.path1	TRINITY_DN26905_c0_g1_i1.path1
novel.4007	Pepsico1_Contig27806.path1	TRINITY_DN4125_c0_g1_i3.path1	Pepsico1_Contig106.path1
TRINITY_DN18356_c0_g1_i1.path1	TRINITY_DN82468_c0_g1_i1.path1	TRINITY_DN27567_c0_g1_i1.path1	TRINITY_DN13622_c0_g3_i1.path1
Pepsico2_Contig18276.path1	novel.1374	TRINITY_DN6102_c0_g1_i1.path1	TRINITY_DN1928_c0_g1_i7.path2
TRINITY_DN23307_c0_g1_i1.path1	Pepsico2_Contig20182.path1	Pepsico1_Contig1934.path2	novel.1175
TRINITY_DN6065_c0_g1_i2.path1	TRINITY_DN24782_c0_g1_i1.path2	TRINITY_DN115449_c0_g1_i1.path1	TRINITY_DN30113_c1_g1_i1.path1
TRINITY_DN33314_c0_g1_i1.path3	TRINITY_DN10397_c0_g1_i1.path1	novel.3473	Pepsico2_Contig20342.path1
TRINITY_DN9998_c0_g2_i1.path1	TRINITY_DN16373_c0_g1_i1.path1	Pepsico2_Contig16925.path1	Pepsico2_Contig7466.path1
Pepsico2_Contig2134.path1	TRINITY_DN20750_c0_g1_i1.path1	Pepsico2_Contig14808.path1	TRINITY_DN13159_c0_g1_i4.path1
TRINITY_DN52841_c0_g1_i1.path1	TRINITY_DN50072_c0_g1_i1.path1	TRINITY_DN17793_c0_g1_i1.path1	novel.1344
Pepsico2_Contig1781.path1	TRINITY_DN9154_c0_g2_i1.path1	Pepsico1_Contig52.path2	Pepsico2_Contig6462.path2
novel.8535	novel.7872	TRINITY_DN10738_c0_g1_i1.path1	novel.3129
TRINITY_DN63402_c0_g1_i1.path2	TRINITY_DN2173_c0_g1_i1.path1	Pepsico1_Contig7564.path1	TRINITY_DN7469_c0_g1_i1.path1
Pepsico2_Contig3164.path1	Pepsico2_Contig11432.path1	TRINITY_DN771_c0_g1_i2.path1	novel.9764
TRINITY_DN90864_c0_g1_i1.path1	TRINITY_DN8233_c0_g3_i1.path1	TRINITY_DN277_c2_g1_i1.path3	TRINITY_DN16585_c0_g1_i1.path1
novel.7720	Pepsico2_Contig9370.path1	TRINITY_DN16303_c0_g1_i4.path1	TRINITY_DN97784_c0_g1_i1.path1
TRINITY_DN102574_c0_g1_i1.path1	Pepsico2_Contig18112.path1	TRINITY_DN5591_c0_g1_i3.path1	novel.609
TRINITY_DN26039_c0_g1_i1.path1	TRINITY_DN13621_c0_g1_i1.path1	TRINITY_DN14321_c0_g1_i1.path1	TRINITY_DN23713_c0_g1_i1.path1
TRINITY_DN16223_c0_g2_i1.path2	TRINITY_DN22030_c0_g1_i4.path1	Pepsico2_Contig8025.path1	novel.4115
Pepsico2_Contig2197.path1	TRINITY_DN80132_c0_g1_i1.path1	Pepsico2_Contig12819.path1	Pepsico2_Contig16793.path1
Pepsico1_Contig1725.path1	novel.2929	novel.2929	TRINITY_DN52891_c0_g1_i1.path1
Pepsico2_Contig6462.path2	novel.616	TRINITY_DN30636_c0_g1_i3.path1	novel.10016
TRINITY_DN2737_c0_g1_i10.path1	novel.7791	TRINITY_DN9402_c0_g1_i1.path1	TRINITY_DN7005_c0_g1_i4.path1
TRINITY_DN101418_c0_g1_i1.path1	TRINITY_DN13858_c0_g2_i1.path1	TRINITY_DN23852_c0_g1_i1.path1	TRINITY_DN373_c0_g2_i8.path1
novel.9039	TRINITY_DN11593_c1_g1_i7.path1	TRINITY_DN10547_c0_g1_i17.path1	TRINITY_DN43155_c0_g1_i1.path1
novel.9629	novel.10027	TRINITY_DN10709_c0_g1_i3.path1	TRINITY_DN28089_c0_g1_i1.path1
novel.5643	TRINITY_DN13294_c1_g1_i1.path1	novel.307	TRINITY_DN4154_c0_g1_i4.path1
TRINITY_DN18904_c0_g1_i1.path2	TRINITY_DN40249_c0_g1_i1.path1	Pepsico2_Contig12399.path1	TRINITY_DN5449_c0_g2_i1.path1
novel.833	novel.3888	TRINITY_DN2385_c0_g1_i1.path2	TRINITY_DN12952_c0_g5_i1.path2
Pepsico2_Contig8794.path2	TRINITY_DN6817_c0_g2_i1.path1	TRINITY_DN39172_c0_g1_i4.path1	TRINITY_DN4139_c0_g2_i1.path1
TRINITY_DN10389_c0_g1_i1.path1	TRINITY_DN5316_c0_g1_i5.path1	novel.1946	TRINITY_DN3659_c2_g1_i1.path1
novel.4248	Pepsico2_Contig14707.path1	TRINITY_DN8148_c0_g1_i1.path1	TRINITY_DN4288_c0_g1_i3.path1
novel.4897	Pepsico1_Contig52.path1	TRINITY_DN5968_c0_g1_i3.path1	Pepsico2_Contig16082.path1
TRINITY_DN76552_c0_g1_i1.path1	novel.2137	TRINITY_DN26227_c0_g1_i2.path1	TRINITY_DN10097_c0_g1_i2.path1
TRINITY_DN31278_c0_g1_i1.path1	TRINITY_DN26771_c0_g1_i1.path1	TRINITY_DN50072_c0_g1_i1.path1	TRINITY_DN6057_c0_g1_i2.path1
novel.372	TRINITY_DN34756_c0_g1_i5.path1	Pepsico2_Contig8849.path1	Pepsico1_Contig7579.path1
Pepsico2_Contig12291.path1	TRINITY_DN22177_c0_g1_i5.path1	novel.2969	Pepsico1_Contig3093.path2
TRINITY_DN7706_c0_g1_i9.path1	novel.5310	Pepsico2_Contig779.path1	TRINITY_DN59017_c0_g1_i1.path1
novel.2921	TRINITY_DN29271_c0_g1_i2.path3	novel.5611	TRINITY_DN13858_c0_g2_i1.path1
TRINITY_DN21506_c0_g1_i1.path1	TRINITY_DN22219_c0_g1_i1.path1	Pepsico2_Contig12122.path1	novel.5700
TRINITY_DN10295_c0_g2_i1.path1	novel.3361	TRINITY_DN35718_c0_g2_i4.path1	novel.645
TRINITY_DN56186_c0_g1_i1.path2	Pepsico2_Contig16749.path1	novel.5050	novel.1076
novel.7707	TRINITY_DN7311_c0_g1_i1.path1	Pepsico2_Contig20063.path1	Pepsico2_Contig2406.path2
TRINITY_DN18663_c0_g3_i1.path1	TRINITY_DN7516_c0_g1_i1.path1	TRINITY_DN18904_c0_g1_i1.path2	Pepsico2_Contig7511.path1
novel.6704	TRINITY_DN5109_c0_g1_i2.path1	Pepsico2_Contig4152.path1	TRINITY_DN65_c0_g2_i1.path1
TRINITY_DN16585_c0_g1_i1.path1	novel.1453	Pepsico2_Contig17404.path1	TRINITY_DN5351_c0_g2_i1.path1
TRINITY_DN67992_c0_g1_i1.path1	Pepsico2_Contig10148.path1	Pepsico1_Contig1029.path1	TRINITY_DN12913_c0_g1_i2.path3
Pepsico2_Contig2625.path1	TRINITY_DN9514_c0_g1_i2.path1	TRINITY_DN18390_c0_g1_i1.path1	novel.4684
Pepsico2_Contig5308.path1	Pepsico2_Contig5930.path2	Pepsico2_Contig4539.path1	TRINITY_DN33475_c0_g1_i2.path1
Pepsico1_Contig3842.path2	novel.10172	TRINITY_DN452_c0_g1_i2.path1	TRINITY_DN10561_c0_g1_i1.path1
Pepsico2_Contig4880.path1	TRINITY_DN10620_c0_g2_i1.path1	TRINITY_DN3262_c0_g1_i4.path1	Pepsico2_Contig2406.path1
Pepsico2_Contig20393.path1	TRINITY_DN3567_c0_g2_i2.path1	TRINITY_DN17168_c0_g3_i1.path2	novel.7636
TRINITY_DN27339_c0_g1_i1.path1	TRINITY_DN6065_c0_g1_i2.path1	TRINITY_DN18616_c0_g1_i4.path1	novel.10554
TRINITY_DN36267_c0_g1_i2.path1	novel.8144	novel.769	Pepsico1_Contig7432.path3
TRINITY_DN50072_c0_g1_i1.path1	TRINITY_DN17093_c0_g1_i1.path1	TRINITY_DN30113_c1_g1_i1.path1	TRINITY_DN15577_c0_g1_i4.path1
TRINITY_DN30268_c0_g5_i1.path1	Pepsico1_Contig1878.path1	TRINITY_DN6057_c0_g1_i2.path1	novel.2193
Pepsico2_Contig17114.path1	TRINITY_DN13715_c0_g1_i1.path1	TRINITY_DN15272_c0_g2_i1.path1	novel.10140
novel.9577	Pepsico2_Contig11330.path1	novel.4846	Pepsico2_Contig13783.path2
novel.10335	Pepsico1_Contig1934.path2	novel.2457	TRINITY_DN88045_c0_g1_i1.path1
TRINITY_DN22732_c0_g2_i3.path1	Pepsico2_Contig7466.path1	TRINITY_DN12254_c0_g1_i1.path1	novel.4354
TRINITY_DN79387_c0_g1_i1.path1	novel.8642	TRINITY_DN106898_c0_g1_i1.path1	TRINITY_DN7178_c0_g2_i1.path1
TRINITY_DN16257_c1_g1_i5.path2	TRINITY_DN63863_c0_g1_i1.path1	TRINITY_DN25015_c0_g1_i1.path1	TRINITY_DN26832_c0_g1_i2.path1
novel.3399	Pepsico1_Contig1479.path1	novel.8808	novel.7477
TRINITY_DN46714_c0_g1_i1.path1	Pepsico2_Contig13304.path1	Pepsico1_Contig1543.path1	TRINITY_DN29620_c0_g2_i1.path1
Pepsico2_Contig20608.path1	novel.7595	novel.996	TRINITY_DN101169_c0_g1_i1.path1
TRINITY_DN3104_c1_g2_i1.path1	TRINITY_DN99452_c0_g1_i1.path2	Pepsico2_Contig3085.path1	TRINITY_DN5876_c1_g1_i1.path1
TRINITY_DN16543_c0_g2_i1.path1	TRINITY_DN33661_c0_g1_i1.path1	TRINITY_DN36021_c0_g1_i1.path1	novel.8499
Pepsico1_Contig4517.path1	Pepsico2_Contig3085.path1	novel.9913	TRINITY_DN10198_c0_g1_i1.path1
novel.9956	Pepsico2_Contig17712.path1	novel.2402	TRINITY_DN5321_c0_g1_i10.path1
Pepsico2_Contig783.path1	novel.996	TRINITY_DN12547_c0_g1_i1.path1	novel.6652
TRINITY_DN38680_c0_g1_i1.path1	novel.5652	Pepsico1_Contig7716.path1	novel.4631
novel.9466	Pepsico1_Contig638.path1	novel.7475	novel.639
TRINITY_DN47288_c0_g1_i1.path1	Pepsico2_Contig10688.path1	novel.6249	TRINITY_DN29073_c0_g1_i3.path2
novel.9280	TRINITY_DN18372_c0_g1_i1.path2	Pepsico2_Contig16925.path2	TRINITY_DN10806_c1_g2_i8.path2
Pepsico1_Contig6738.path1	TRINITY_DN5938_c0_g3_i1.path1	Pepsico1_Contig1896.path1	Pepsico1_Contig5984.path1
TRINITY_DN5076_c0_g1_i5.path1	TRINITY_DN5355_c1_g1_i3.path1	Pepsico2_Contig13724.path1	TRINITY_DN13763_c0_g1_i1.path1
TRINITY_DN10021_c0_g1_i6.path1	novel.3796	Pepsico1_Contig2258.path2	novel.278
TRINITY_DN27832_c0_g1_i1.path1	novel.5385	Pepsico2_Contig10688.path1	novel.8601
TRINITY_DN494_c0_g2_i4.path1	novel.1958	Pepsico1_Contig7432.path3	TRINITY_DN37282_c0_g1_i1.path2
novel.5310	TRINITY_DN9701_c0_g1_i1.path1	TRINITY_DN15198_c0_g1_i2.path2	Pepsico2_Contig20105.path1
TRINITY_DN13108_c0_g1_i1.path2	TRINITY_DN6139_c0_g2_i2.path1	TRINITY_DN3739_c0_g1_i2.path1	Pepsico1_Contig92.path1
novel.687	TRINITY_DN55825_c0_g1_i1.path1	TRINITY_DN33313_c0_g2_i2.path1	TRINITY_DN97496_c0_g1_i1.path1
Pepsico2_Contig16834.path1	TRINITY_DN18904_c0_g1_i1.path2	Pepsico2_Contig7699.path1	TRINITY_DN35543_c0_g1_i4.path1
TRINITY_DN30653_c0_g1_i1.path1	TRINITY_DN15518_c0_g1_i5.path1	Pepsico2_Contig20128.path1	Pepsico2_Contig14991.path2
Pepsico2_Contig19268.path2	TRINITY_DN5199_c0_g2_i1.path2	TRINITY_DN7472_c0_g2_i1.path1	Pepsico1_Contig4128.path1
TRINITY_DN19573_c0_g1_i1.path1	TRINITY_DN51801_c0_g3_i2.path1	TRINITY_DN4_c0_g1_i6.path2	Pepsico1_Contig1806.path1
novel.651	TRINITY_DN11902_c0_g2_i2.path1	Pepsico2_Contig7177.path1	TRINITY_DN16509_c1_g1_i2.path1
Pepsico2_Contig3010.path1	TRINITY_DN17397_c0_g1_i2.path1	Pepsico2_Contig3845.path1	Pepsico1_Contig1543.path1
Pepsico2_Contig4899.path1	TRINITY_DN89105_c0_g1_i1.path1	TRINITY_DN12400_c0_g1_i9.path1	Pepsico2_Contig19129.path1
TRINITY_DN44343_c0_g1_i1.path2	novel.4381	Pepsico2_Contig6462.path2	Pepsico1_Contig501.path1
TRINITY_DN26771_c0_g1_i1.path1	TRINITY_DN27605_c0_g1_i2.path1	TRINITY_DN78422_c0_g1_i2.path1	Pepsico2_Contig17842.path1
Pepsico2_Contig9136.path1	novel.3012	novel.8008	TRINITY_DN7146_c0_g1_i2.path3
TRINITY_DN10890_c0_g2_i1.path1	TRINITY_DN10928_c0_g1_i7.path2	TRINITY_DN4504_c1_g2_i1.path1	Pepsico2_Contig5308.path1
TRINITY_DN18744_c0_g1_i1.path3	TRINITY_DN2337_c0_g1_i6.path1	TRINITY_DN16176_c0_g1_i3.path1	TRINITY_DN36021_c0_g1_i1.path1
TRINITY_DN8648_c0_g1_i4.path2	novel.1959	TRINITY_DN43808_c0_g4_i1.path1	TRINITY_DN12547_c0_g1_i1.path1
novel.8125	novel.4225	TRINITY_DN108916_c0_g1_i1.path1	TRINITY_DN14356_c1_g1_i10.path2
novel.6260	novel.4602	TRINITY_DN26453_c0_g2_i5.path2	TRINITY_DN20691_c0_g2_i1.path1
Pepsico2_Contig15519.path2	novel.1946	TRINITY_DN21253_c0_g5_i1.path1	TRINITY_DN16572_c0_g1_i1.path1
TRINITY_DN41418_c0_g1_i3.path1	novel.5258	TRINITY_DN78855_c0_g1_i1.path1	novel.6946
novel.5655	TRINITY_DN10837_c0_g1_i1.path1	TRINITY_DN2365_c0_g1_i15.path2	Pepsico2_Contig9370.path1
Pepsico2_Contig15286.path1	Pepsico1_Contig7353.path1	TRINITY_DN24281_c0_g1_i3.path2	novel.4679
novel.7089	novel.8861	TRINITY_DN41090_c0_g1_i2.path2	Pepsico2_Contig1309.path1
TRINITY_DN9129_c0_g1_i1.path2	TRINITY_DN27567_c0_g1_i1.path1	novel.2448	TRINITY_DN5321_c0_g1_i10.path2
TRINITY_DN1968_c0_g1_i4.path2	Pepsico2_Contig6525.path1	TRINITY_DN25070_c0_g1_i1.path2	TRINITY_DN1766_c0_g2_i2.path1
TRINITY_DN108824_c0_g1_i1.path1	TRINITY_DN7122_c0_g1_i3.path1	Pepsico2_Contig6534.path2	TRINITY_DN15215_c0_g1_i1.path2
TRINITY_DN67103_c0_g1_i1.path1	novel.9616	novel.1627	Pepsico1_Contig2258.path1
TRINITY_DN41675_c0_g1_i1.path1	TRINITY_DN21711_c0_g1_i1.path2	TRINITY_DN10389_c0_g1_i1.path1	novel.3628
TRINITY_DN6942_c0_g1_i2.path1	TRINITY_DN33314_c0_g1_i1.path1	Pepsico2_Contig971.path1	novel.2291
TRINITY_DN14495_c0_g1_i2.path1	Pepsico2_Contig9102.path1	TRINITY_DN7964_c0_g1_i2.path1	Pepsico2_Contig17404.path1
TRINITY_DN90937_c0_g1_i1.path1	TRINITY_DN7830_c0_g1_i1.path1	TRINITY_DN4975_c0_g1_i3.path2	Pepsico1_Contig28290.path1
TRINITY_DN89105_c0_g1_i1.path1	TRINITY_DN20603_c1_g1_i1.path1	TRINITY_DN34220_c0_g1_i1.path1	novel.3460
Pepsico2_Contig4420.path1	novel.8779	TRINITY_DN15240_c0_g1_i3.path1	TRINITY_DN21706_c0_g1_i3.path2
TRINITY_DN19086_c0_g1_i2.path1	TRINITY_DN14737_c0_g1_i1.path1	TRINITY_DN23713_c0_g1_i1.path1	novel.5643
novel.3397	TRINITY_DN11954_c0_g1_i6.path1	Pepsico2_Contig18011.path1	novel.2969
novel.10027	Pepsico2_Contig2197.path2	TRINITY_DN7412_c0_g1_i1.path1	TRINITY_DN3070_c1_g1_i2.path2
novel.6082	TRINITY_DN14050_c0_g1_i4.path1	TRINITY_DN11902_c0_g2_i2.path1	Pepsico2_Contig20182.path1
TRINITY_DN34221_c0_g1_i1.path1	TRINITY_DN12917_c0_g1_i1.path1	Pepsico1_Contig2049.path1	novel.2138
TRINITY_DN58092_c0_g1_i1.path1	TRINITY_DN102574_c0_g1_i1.path1	TRINITY_DN4646_c1_g1_i1.path1	TRINITY_DN2492_c0_g1_i1.path1
Pepsico1_Contig1064.path1	TRINITY_DN8652_c0_g1_i6.path1	Pepsico1_Contig1064.path1	TRINITY_DN5816_c1_g1_i1.path1
novel.2935	TRINITY_DN24281_c0_g1_i3.path2	TRINITY_DN2098_c0_g2_i1.path1	TRINITY_DN22284_c0_g2_i1.path1
novel.2402	Pepsico1_Contig107.path1	Pepsico2_Contig7511.path1	Pepsico2_Contig9003.path1
TRINITY_DN10437_c0_g1_i2.path1	TRINITY_DN34221_c0_g1_i1.path2	TRINITY_DN5816_c0_g1_i8.path1	novel.8359
TRINITY_DN25624_c0_g1_i4.path1	TRINITY_DN30875_c0_g1_i1.path1	TRINITY_DN14594_c0_g1_i1.path2	TRINITY_DN27219_c0_g1_i7.path1
TRINITY_DN32809_c0_g1_i2.path1	TRINITY_DN17072_c0_g1_i4.path2	TRINITY_DN4456_c0_g2_i10.path2	TRINITY_DN25384_c0_g2_i1.path3
TRINITY_DN8680_c0_g1_i1.path2	Pepsico1_Contig1793.path1	TRINITY_DN3634_c0_g1_i4.path2	novel.9659
TRINITY_DN40238_c1_g1_i1.path2	Pepsico2_Contig14438.path1	novel.2098	TRINITY_DN32994_c0_g1_i1.path1
Pepsico1_Contig1120.path2	TRINITY_DN16351_c0_g1_i2.path1	Pepsico2_Contig1842.path1	Pepsico2_Contig971.path1
TRINITY_DN5235_c0_g2_i1.path1	Pepsico2_Contig12122.path1	novel.2855	TRINITY_DN1019_c0_g2_i1.path1
TRINITY_DN13776_c0_g1_i3.path1	novel.2935	novel.2550	novel.1553
TRINITY_DN20878_c0_g2_i1.path1	TRINITY_DN9742_c0_g1_i1.path1	novel.10016	TRINITY_DN4125_c0_g1_i3.path1
Pepsico2_Contig6846.path1	Pepsico2_Contig12058.path1	Pepsico1_Contig52.path1	TRINITY_DN23438_c0_g1_i5.path1
TRINITY_DN2145_c0_g1_i1.path2	Pepsico1_Contig1029.path1	TRINITY_DN21428_c0_g1_i3.path1	TRINITY_DN5939_c0_g3_i1.path1
Pepsico2_Contig2607.path1	novel.5681	Pepsico2_Contig9477.path1	TRINITY_DN4502_c2_g1_i1.path1
TRINITY_DN13858_c0_g2_i1.path1	Pepsico2_Contig11289.path2	novel.1615	Pepsico1_Contig244.path1
TRINITY_DN30275_c0_g1_i1.path2	TRINITY_DN99301_c0_g1_i1.path1	TRINITY_DN236_c0_g1_i2.path1	Pepsico1_Contig901.path1
TRINITY_DN79340_c0_g1_i1.path1	TRINITY_DN26227_c0_g1_i2.path1	Pepsico2_Contig17067.path1	TRINITY_DN3174_c1_g1_i2.path1
TRINITY_DN10302_c0_g1_i5.path1	TRINITY_DN19173_c0_g1_i3.path2	TRINITY_DN5010_c0_g1_i1.path1	TRINITY_DN34621_c0_g1_i1.path2
novel.9338	novel.1165	Pepsico2_Contig13792.path1	Pepsico1_Contig1806.path2
TRINITY_DN33204_c0_g1_i1.path1	TRINITY_DN97533_c0_g1_i1.path1	TRINITY_DN4437_c0_g1_i2.path2	Pepsico2_Contig3722.path1
TRINITY_DN86212_c0_g1_i1.path1	TRINITY_DN45570_c0_g1_i1.path1	TRINITY_DN17093_c0_g1_i1.path1	Pepsico2_Contig18011.path1
novel.9743	TRINITY_DN13490_c0_g1_i5.path1	TRINITY_DN15500_c0_g3_i1.path1	TRINITY_DN11954_c0_g1_i6.path2
TRINITY_DN10286_c0_g1_i2.path1	TRINITY_DN27955_c0_g1_i1.path1	Pepsico2_Contig18065.path1	TRINITY_DN18091_c0_g1_i1.path1
novel.9323	Pepsico2_Contig11307.path1	TRINITY_DN34430_c0_g3_i1.path1	TRINITY_DN33691_c0_g1_i1.path2
Pepsico1_Contig638.path1	Pepsico2_Contig6846.path1	TRINITY_DN10888_c0_g1_i3.path1	novel.1622
novel.4697	Pepsico2_Contig3785.path1	TRINITY_DN37282_c0_g1_i1.path2	TRINITY_DN20750_c0_g1_i1.path1
Pepsico2_Contig18181.path1	Pepsico1_Contig7138.path1	TRINITY_DN6082_c0_g2_i1.path1	Pepsico2_Contig16925.path2
novel.5358	novel.1781	TRINITY_DN10451_c0_g1_i2.path1	TRINITY_DN15420_c0_g1_i4.path1
Pepsico2_Contig14182.path1	novel.7729	TRINITY_DN65_c0_g2_i1.path1	TRINITY_DN33307_c0_g1_i2.path1
Pepsico2_Contig8195.path1	Pepsico2_Contig5887.path1	Pepsico1_Contig14950.path1	novel.7475
novel.1412	TRINITY_DN1543_c0_g1_i1.path2	novel.1011	Pepsico1_Contig1029.path1
novel.8750	TRINITY_DN2098_c0_g2_i1.path1	TRINITY_DN32510_c0_g1_i1.path1	Pepsico1_Contig3567.path1
TRINITY_DN21706_c0_g2_i1.path1	TRINITY_DN9650_c0_g2_i1.path1	novel.4115	TRINITY_DN24567_c0_g2_i1.path1
novel.2005	TRINITY_DN70178_c0_g1_i1.path1	Pepsico2_Contig12625.path1	Pepsico1_Contig239.path1
TRINITY_DN13946_c0_g1_i2.path1	TRINITY_DN22560_c0_g1_i4.path1	TRINITY_DN22560_c0_g1_i4.path1	TRINITY_DN5355_c1_g1_i3.path1
novel.3871	Pepsico2_Contig8849.path1	TRINITY_DN9494_c0_g1_i2.path1	Pepsico2_Contig7175.path1
novel.7783	novel.7247	TRINITY_DN95125_c0_g1_i1.path1	novel.3143
Pepsico2_Contig20183.path1	TRINITY_DN34723_c0_g1_i1.path1	TRINITY_DN6909_c0_g1_i6.path2	Pepsico1_Contig1511.path1
TRINITY_DN39197_c0_g1_i5.path1	TRINITY_DN37640_c0_g1_i1.path1	TRINITY_DN19166_c0_g1_i6.path1	Pepsico2_Contig2152.path1
TRINITY_DN1148_c0_g1_i2.path1	TRINITY_DN46714_c0_g1_i1.path1	TRINITY_DN4640_c0_g2_i1.path1	TRINITY_DN6678_c0_g2_i1.path1
TRINITY_DN5246_c0_g1_i1.path2	TRINITY_DN13830_c1_g1_i1.path1	novel.10240	TRINITY_DN23943_c0_g5_i1.path1
novel.7197	Pepsico2_Contig18189.path1	TRINITY_DN10097_c0_g1_i2.path1	Pepsico2_Contig11300.path1
TRINITY_DN99301_c0_g1_i1.path1	Pepsico1_Contig125.path1	Pepsico2_Contig1104.path1	novel.3521
novel.3056	Pepsico1_Contig1806.path1	novel.3361	novel.769
TRINITY_DN14495_c0_g1_i2.path2	Pepsico1_Contig28290.path1	TRINITY_DN20837_c0_g1_i1.path2	Pepsico2_Contig6534.path2
novel.3593	TRINITY_DN3106_c0_g2_i1.path1	Pepsico2_Contig16992.path1	novel.996
novel.5839	TRINITY_DN24212_c0_g1_i1.path1	Pepsico1_Contig1029.path2	Pepsico2_Contig7439.path1
TRINITY_DN58406_c0_g1_i1.path2	TRINITY_DN87711_c0_g1_i1.path2	TRINITY_DN89105_c0_g1_i1.path1	TRINITY_DN18616_c0_g1_i4.path1
Pepsico2_Contig6611.path4	TRINITY_DN90864_c0_g1_i1.path1	TRINITY_DN15215_c0_g1_i1.path2	novel.5925
novel.9905	TRINITY_DN249_c1_g1_i1.path1	TRINITY_DN27295_c0_g1_i1.path1	TRINITY_DN78855_c0_g1_i1.path1
TRINITY_DN8618_c0_g2_i4.path1	TRINITY_DN24065_c0_g1_i1.path1	TRINITY_DN17273_c0_g1_i1.path1	TRINITY_DN4879_c0_g2_i1.path1
TRINITY_DN7443_c0_g2_i1.path1	TRINITY_DN91660_c0_g1_i1.path1	novel.1803	TRINITY_DN32510_c0_g1_i1.path1
novel.3110	novel.1139	Pepsico1_Contig1064.path2	Pepsico1_Contig516.path1
novel.1997	novel.2651	TRINITY_DN8392_c0_g1_i2.path1	TRINITY_DN4360_c2_g1_i3.path2
novel.3883	Pepsico1_Contig3412.path1	TRINITY_DN2098_c1_g1_i5.path1	TRINITY_DN2145_c0_g1_i1.path1
TRINITY_DN21711_c0_g1_i1.path2	TRINITY_DN30706_c0_g1_i2.path1	novel.1031	Pepsico2_Contig6161.path1
Pepsico1_Contig1878.path1	TRINITY_DN27062_c0_g1_i1.path1	Pepsico2_Contig11248.path1	novel.8861
Pepsico2_Contig8571.path1	TRINITY_DN40354_c0_g1_i2.path1	TRINITY_DN2337_c0_g2_i1.path1	TRINITY_DN15198_c0_g3_i1.path1
novel.2764	Pepsico2_Contig7699.path1	novel.5347	TRINITY_DN21346_c0_g1_i2.path1
TRINITY_DN4494_c0_g2_i2.path1	TRINITY_DN7127_c0_g2_i6.path1	novel.3212	Pepsico1_Contig7716.path1
TRINITY_DN11902_c0_g2_i2.path1	Pepsico2_Contig5200.path1	TRINITY_DN17321_c0_g1_i4.path2	Pepsico1_Contig1034.path1
TRINITY_DN9952_c0_g3_i1.path2	Pepsico2_Contig17986.path1	Pepsico2_Contig15057.path1	TRINITY_DN25070_c0_g1_i1.path1
novel.1119	Pepsico2_Contig14292.path1	novel.2890	TRINITY_DN21318_c0_g1_i1.path1
TRINITY_DN40249_c0_g1_i1.path1	Pepsico2_Contig11300.path1	Pepsico1_Contig2677.path1	TRINITY_DN96580_c0_g1_i1.path1
TRINITY_DN28064_c0_g2_i2.path1	TRINITY_DN4360_c2_g1_i3.path1	TRINITY_DN19720_c0_g1_i1.path1	Pepsico2_Contig3085.path1
TRINITY_DN10059_c0_g2_i4.path1	TRINITY_DN24567_c0_g1_i1.path1	TRINITY_DN5816_c1_g1_i1.path1	TRINITY_DN10888_c0_g1_i3.path1
Pepsico1_Contig3834.path1	TRINITY_DN21593_c1_g1_i1.path1	TRINITY_DN69825_c0_g1_i1.path1	TRINITY_DN3489_c0_g1_i2.path1
TRINITY_DN21717_c0_g1_i1.path1	Pepsico2_Contig9464.path1	novel.4995	TRINITY_DN24505_c0_g1_i1.path1
TRINITY_DN1241_c1_g1_i1.path1	TRINITY_DN6678_c0_g2_i1.path1	TRINITY_DN21016_c0_g1_i1.path1	Pepsico2_Contig17718.path1
Pepsico2_Contig14260.path1	Pepsico1_Contig2677.path1	novel.2183	novel.9457
novel.616	novel.9333	TRINITY_DN13254_c1_g1_i1.path1	Pepsico1_Contig3307.path1
Pepsico2_Contig3005.path1	TRINITY_DN109604_c0_g1_i1.path1	TRINITY_DN42787_c0_g1_i1.path1	TRINITY_DN10094_c0_g3_i1.path1
Pepsico2_Contig3671.path1	TRINITY_DN18387_c0_g1_i3.path1	Pepsico2_Contig14530.path1	TRINITY_DN10752_c0_g1_i1.path1
novel.1417	TRINITY_DN60733_c0_g1_i1.path1	TRINITY_DN2414_c0_g2_i1.path1	TRINITY_DN2761_c0_g2_i3.path1
TRINITY_DN6909_c0_g1_i6.path2	Pepsico1_Contig2047.path1	novel.278	novel.2448
TRINITY_DN1966_c0_g1_i1.path1	TRINITY_DN26453_c0_g2_i5.path2	TRINITY_DN13858_c0_g1_i1.path1	TRINITY_DN363_c0_g1_i5.path1
TRINITY_DN18179_c0_g1_i5.path2	TRINITY_DN14321_c0_g1_i1.path1	Pepsico2_Contig8591.path1	novel.1495
novel.1630	Pepsico1_Contig125.path2	TRINITY_DN13635_c0_g1_i6.path2	novel.6254
TRINITY_DN41304_c0_g1_i1.path1	novel.8939	TRINITY_DN15272_c0_g3_i1.path1	Pepsico2_Contig5121.path1
novel.259	Pepsico2_Contig12399.path1	TRINITY_DN27643_c0_g1_i3.path2	TRINITY_DN23642_c0_g1_i4.path1
TRINITY_DN24065_c0_g1_i1.path1	novel.2683	TRINITY_DN2761_c0_g2_i3.path1	novel.9905
TRINITY_DN24281_c0_g1_i3.path2	Pepsico2_Contig16925.path2	TRINITY_DN10612_c0_g1_i14.path1	TRINITY_DN10782_c0_g1_i1.path1
TRINITY_DN17093_c0_g1_i1.path1	TRINITY_DN20528_c0_g1_i1.path1	TRINITY_DN15455_c0_g1_i7.path2	Pepsico2_Contig18357.path1
Pepsico2_Contig14213.path1	Pepsico2_Contig7773.path1	TRINITY_DN18264_c0_g1_i3.path1	TRINITY_DN13217_c0_g1_i1.path1
TRINITY_DN31074_c0_g1_i2.path2	novel.2081	Pepsico1_Contig3021.path1	Pepsico2_Contig13724.path1
novel.1049	Pepsico2_Contig2460.path1	TRINITY_DN25070_c0_g1_i1.path1	Pepsico2_Contig5073.path1
Pepsico1_Contig7054.path2	novel.2762	Pepsico2_Contig15312.path1	Pepsico2_Contig7855.path1
novel.1210	TRINITY_DN7412_c0_g1_i1.path1	novel.7472	TRINITY_DN12536_c0_g1_i4.path2
TRINITY_DN12913_c0_g1_i2.path2	Pepsico1_Contig377.path1	TRINITY_DN9712_c0_g3_i2.path1	TRINITY_DN22741_c0_g2_i2.path1
TRINITY_DN42172_c0_g1_i1.path2	TRINITY_DN79263_c0_g1_i1.path1	novel.1849	TRINITY_DN26771_c0_g1_i1.path1
novel.10007	novel.4263	TRINITY_DN15500_c0_g3_i1.path2	TRINITY_DN3394_c1_g1_i3.path1
TRINITY_DN31731_c0_g1_i2.path1	novel.4164	TRINITY_DN7271_c0_g1_i3.path1	Pepsico2_Contig10648.path1
TRINITY_DN24505_c0_g1_i1.path1	Pepsico2_Contig20023.path1	Pepsico1_Contig125.path1	Pepsico2_Contig14494.path1
TRINITY_DN4734_c0_g1_i5.path2	TRINITY_DN23705_c0_g2_i2.path1	Pepsico2_Contig18112.path1	novel.1615
TRINITY_DN4119_c1_g1_i4.path1	Pepsico1_Contig350.path1	Pepsico2_Contig13004.path1	novel.5751
novel.1927	novel.230	novel.1260	novel.7882
TRINITY_DN1911_c0_g1_i10.path1	TRINITY_DN18135_c0_g1_i1.path1	TRINITY_DN16767_c0_g1_i2.path1	Pepsico1_Contig130.path1
Pepsico2_Contig16525.path1	TRINITY_DN11163_c1_g2_i1.path1	novel.9844	Pepsico2_Contig11307.path1
TRINITY_DN40757_c0_g1_i2.path1	TRINITY_DN80803_c0_g1_i1.path1	TRINITY_DN16298_c0_g2_i1.path1	novel.2442
Pepsico1_Contig22394.path1	TRINITY_DN104219_c0_g1_i1.path1	TRINITY_DN6633_c0_g1_i5.path2	Pepsico1_Contig196.path1
Pepsico1_Contig1515.path1	TRINITY_DN33707_c0_g1_i5.path1	TRINITY_DN31414_c0_g2_i2.path1	Pepsico2_Contig5071.path1
TRINITY_DN30875_c0_g1_i1.path1	TRINITY_DN11005_c1_g1_i2.path1	TRINITY_DN22425_c0_g1_i1.path1	TRINITY_DN9693_c0_g1_i7.path1
TRINITY_DN20775_c0_g1_i3.path2	TRINITY_DN79503_c0_g1_i1.path1	Pepsico2_Contig2718.path1	Pepsico2_Contig16925.path1
novel.4975	novel.3240	Pepsico2_Contig8305.path1	TRINITY_DN106240_c0_g1_i1.path1
novel.7423	TRINITY_DN2414_c1_g1_i3.path1	TRINITY_DN8233_c0_g3_i1.path1	TRINITY_DN4646_c1_g1_i1.path1
novel.8383	novel.1785	Pepsico2_Contig14825.path1	TRINITY_DN19092_c0_g1_i1.path1
TRINITY_DN3106_c1_g1_i1.path1	Pepsico2_Contig7517.path2	TRINITY_DN3489_c0_g1_i2.path1	Pepsico2_Contig31.path1
Pepsico1_Contig3638.path2	TRINITY_DN51761_c3_g2_i3.path1	novel.4101	TRINITY_DN22560_c0_g1_i4.path1
TRINITY_DN20994_c0_g1_i1.path1	Pepsico2_Contig4918.path1	TRINITY_DN14533_c0_g1_i4.path1	TRINITY_DN8645_c0_g1_i16.path1
TRINITY_DN16373_c0_g1_i1.path1	Pepsico1_Contig28355.path1	Pepsico2_Contig7439.path1	Pepsico2_Contig3282.path1
TRINITY_DN51929_c0_g1_i1.path1	novel.7876	TRINITY_DN15272_c1_g1_i1.path1	novel.2782
TRINITY_DN14737_c0_g1_i1.path2	Pepsico2_Contig16925.path1	TRINITY_DN7521_c0_g1_i1.path2	TRINITY_DN24444_c0_g1_i1.path1
TRINITY_DN1397_c0_g3_i1.path1	TRINITY_DN17710_c0_g2_i2.path1	TRINITY_DN18161_c0_g1_i10.path1	Pepsico1_Contig874.path1
TRINITY_DN49805_c0_g1_i1.path1	TRINITY_DN16114_c0_g1_i3.path1	novel.9078	Pepsico2_Contig9786.path1
novel.5760	novel.2466	novel.9244	TRINITY_DN19759_c0_g1_i2.path1
TRINITY_DN22245_c0_g1_i1.path1	TRINITY_DN40927_c0_g1_i3.path1	TRINITY_DN28038_c0_g1_i1.path1	TRINITY_DN31414_c0_g2_i2.path1
novel.7110	TRINITY_DN35910_c0_g1_i1.path1	Pepsico2_Contig19129.path1	Pepsico2_Contig15057.path1
TRINITY_DN41201_c0_g1_i1.path2	Pepsico2_Contig18269.path1	TRINITY_DN35580_c0_g1_i6.path1	Pepsico1_Contig1393.path1
novel.7150	Pepsico2_Contig783.path1	TRINITY_DN16228_c0_g1_i5.path1	TRINITY_DN14943_c0_g4_i1.path1
novel.2510	TRINITY_DN40238_c1_g1_i1.path2	novel.1064	TRINITY_DN4172_c0_g1_i16.path1
novel.3310	novel.5457	Pepsico2_Contig1744.path1	TRINITY_DN577_c0_g1_i8.path1
TRINITY_DN39457_c0_g2_i1.path1	novel.2510	novel.10101	TRINITY_DN18488_c0_g1_i1.path1
novel.6508	TRINITY_DN49172_c0_g1_i1.path1	TRINITY_DN1122_c0_g2_i1.path1	TRINITY_DN42787_c0_g1_i1.path1
TRINITY_DN55806_c0_g1_i1.path1	TRINITY_DN2145_c0_g1_i1.path2	Pepsico2_Contig13783.path2	Pepsico1_Contig2378.path2
novel.4602	Pepsico1_Contig1271.path2	TRINITY_DN28234_c0_g2_i1.path2	Pepsico1_Contig2524.path1
TRINITY_DN109452_c0_g1_i1.path1	novel.4365	TRINITY_DN4132_c0_g2_i1.path1	novel.5362
Pepsico2_Contig7596.path1	Pepsico2_Contig11248.path1	Pepsico1_Contig805.path1	novel.9609
novel.1437	TRINITY_DN25872_c0_g1_i1.path2	Pepsico1_Contig3669.path1	TRINITY_DN2414_c0_g2_i1.path1
TRINITY_DN31417_c0_g2_i1.path1	TRINITY_DN37783_c3_g1_i1.path1	Pepsico2_Contig13626.path1	Pepsico1_Contig1823.path1
novel.6296	TRINITY_DN32090_c0_g2_i1.path1	Pepsico2_Contig14213.path1	TRINITY_DN37508_c0_g1_i2.path1
Pepsico2_Contig583.path1	TRINITY_DN35580_c0_g1_i6.path1	TRINITY_DN11760_c0_g1_i2.path1	TRINITY_DN28154_c0_g1_i4.path1
TRINITY_DN63001_c0_g1_i1.path1	Pepsico2_Contig3520.path1	TRINITY_DN87669_c0_g1_i1.path1	Pepsico1_Contig195.path1
TRINITY_DN68934_c0_g1_i1.path1	novel.5005	TRINITY_DN14103_c0_g1_i5.path1	TRINITY_DN17321_c0_g1_i4.path1
novel.7877	TRINITY_DN42762_c0_g1_i1.path3	TRINITY_DN10806_c1_g2_i8.path1	novel.4252
novel.5652	TRINITY_DN14129_c0_g1_i5.path2	TRINITY_DN5976_c0_g1_i12.path2	TRINITY_DN2098_c0_g2_i1.path1
TRINITY_DN21547_c0_g2_i1.path1	novel.4101	Pepsico2_Contig11300.path1	Pepsico2_Contig11289.path2
TRINITY_DN13635_c0_g1_i6.path2	novel.7423	novel.1050	TRINITY_DN37934_c0_g1_i3.path1
novel.3962	TRINITY_DN36053_c0_g1_i1.path1	novel.2119	novel.280
Pepsico2_Contig5832.path1	TRINITY_DN6909_c0_g1_i6.path1	Pepsico2_Contig10148.path1	TRINITY_DN16279_c0_g1_i1.path4
TRINITY_DN10587_c0_g2_i2.path1	TRINITY_DN19759_c0_g1_i2.path1	Pepsico1_Contig22407.path1	novel.5863
Pepsico2_Contig12144.path2	novel.10240	TRINITY_DN97971_c0_g1_i1.path1	TRINITY_DN2414_c1_g1_i3.path1
TRINITY_DN26388_c0_g1_i3.path1	TRINITY_DN46578_c0_g1_i1.path1	novel.1837	TRINITY_DN50072_c0_g1_i1.path1
TRINITY_DN80397_c0_g1_i1.path1	TRINITY_DN10620_c0_g1_i4.path1	novel.82	TRINITY_DN37972_c0_g1_i2.path2
TRINITY_DN17286_c0_g1_i1.path1	novel.1489	novel.5209	TRINITY_DN34430_c0_g3_i1.path1
TRINITY_DN31093_c0_g2_i2.path1	TRINITY_DN53024_c0_g1_i1.path1	TRINITY_DN61132_c0_g1_i1.path1	Pepsico2_Contig20128.path1
novel.9506	Pepsico2_Contig19129.path1	TRINITY_DN23438_c0_g1_i5.path1	TRINITY_DN7223_c0_g1_i5.path1
TRINITY_DN8773_c0_g2_i1.path1	TRINITY_DN33314_c0_g1_i1.path3	novel.9555	Pepsico2_Contig20063.path1
novel.9288	novel.5418	novel.7247	TRINITY_DN41090_c0_g1_i2.path2
novel.8551	TRINITY_DN11985_c0_g1_i1.path1	TRINITY_DN14241_c0_g1_i1.path1	Pepsico2_Contig19393.path1
novel.1190	novel.2332	TRINITY_DN4289_c0_g1_i2.path1	TRINITY_DN7521_c0_g1_i1.path1
TRINITY_DN14737_c0_g1_i1.path1	TRINITY_DN57668_c0_g1_i1.path1	TRINITY_DN3106_c0_g2_i1.path1	Pepsico2_Contig8136.path1
TRINITY_DN43050_c0_g1_i1.path1	Pepsico1_Contig1860.path1	Pepsico2_Contig2406.path1	novel.5209
novel.1331	Pepsico1_Contig526.path2	TRINITY_DN15092_c0_g1_i1.path1	Pepsico2_Contig2134.path1
novel.9961	TRINITY_DN95125_c0_g1_i1.path1	Pepsico2_Contig2029.path1	TRINITY_DN14296_c0_g1_i1.path1
TRINITY_DN32977_c0_g1_i1.path1	novel.10120	TRINITY_DN52025_c0_g2_i1.path1	novel.1572
TRINITY_DN87711_c0_g1_i1.path2	TRINITY_DN24409_c0_g1_i2.path1	TRINITY_DN15407_c0_g1_i3.path2	Pepsico1_Contig2631.path1
novel.7729	novel.1955	novel.9345	TRINITY_DN48822_c0_g1_i2.path1
TRINITY_DN2852_c0_g1_i3.path2	TRINITY_DN87669_c0_g1_i1.path1	novel.9761	Pepsico2_Contig4152.path1
novel.3342	novel.6783	TRINITY_DN12913_c0_g1_i2.path2	TRINITY_DN18638_c0_g3_i1.path1
novel.5617	Pepsico1_Contig4464.path1	Pepsico2_Contig3799.path1	novel.1962
novel.5680	Pepsico2_Contig7517.path1	Pepsico2_Contig1752.path1	novel.2402
novel.6139	TRINITY_DN40416_c0_g1_i1.path3	TRINITY_DN46317_c0_g1_i1.path2	TRINITY_DN5721_c0_g1_i1.path1
Pepsico1_Contig3146.path1	novel.2170	novel.3129	novel.2184
novel.6856	Pepsico2_Contig7839.path2	TRINITY_DN5876_c0_g3_i1.path1	TRINITY_DN73578_c0_g1_i1.path1
TRINITY_DN23596_c0_g1_i3.path1	TRINITY_DN976_c0_g1_i2.path2	Pepsico1_Contig2723.path1	TRINITY_DN3027_c0_g1_i4.path1
novel.5925	TRINITY_DN22698_c0_g1_i1.path1	TRINITY_DN14877_c0_g1_i2.path1	TRINITY_DN75757_c0_g1_i1.path1
Pepsico2_Contig11017.path2	novel.4643	novel.193	novel.2802
TRINITY_DN85368_c0_g1_i1.path1	Pepsico2_Contig11033.path1	Pepsico1_Contig964.path1	TRINITY_DN7691_c0_g2_i1.path1
TRINITY_DN12917_c0_g1_i1.path1	TRINITY_DN26905_c0_g1_i1.path1	Pepsico1_Contig7579.path1	novel.1630
novel.5517	TRINITY_DN108824_c0_g1_i1.path1	novel.5640	Pepsico2_Contig6417.path1
TRINITY_DN10198_c0_g1_i1.path1	Pepsico2_Contig14991.path2	TRINITY_DN10782_c0_g1_i1.path1	TRINITY_DN20864_c0_g1_i1.path1
novel.1975	Pepsico1_Contig843.path1	Pepsico2_Contig17958.path1	novel.5457
TRINITY_DN3489_c0_g1_i2.path1	TRINITY_DN5876_c0_g3_i1.path1	TRINITY_DN11985_c0_g1_i1.path1	novel.10232
TRINITY_DN82468_c0_g1_i1.path1	novel.1997	novel.10221	Pepsico2_Contig6528.path1
TRINITY_DN18481_c0_g1_i2.path1	novel.239	TRINITY_DN35752_c0_g1_i2.path1	novel.9736
Pepsico2_Contig11016.path1	Pepsico2_Contig20608.path1	Pepsico2_Contig6611.path2	novel.1837
TRINITY_DN24907_c0_g1_i4.path1	TRINITY_DN3986_c0_g1_i1.path1	TRINITY_DN11270_c1_g1_i1.path1	novel.2850
TRINITY_DN47113_c0_g3_i1.path1	novel.1849	novel.645	Pepsico2_Contig17058.path1
TRINITY_DN18488_c0_g1_i1.path1	novel.9607	Pepsico1_Contig3224.path1	TRINITY_DN28930_c0_g2_i2.path1
TRINITY_DN88688_c0_g1_i1.path1	TRINITY_DN6421_c0_g1_i4.path1	TRINITY_DN15198_c0_g3_i1.path1	Pepsico2_Contig3516.path1
novel.8765	novel.10124	TRINITY_DN14737_c0_g1_i1.path1	TRINITY_DN60652_c0_g1_i1.path1
TRINITY_DN21191_c0_g1_i1.path1	TRINITY_DN4154_c0_g1_i4.path1	Pepsico2_Contig3722.path1	TRINITY_DN12603_c0_g1_i2.path1
TRINITY_DN14050_c0_g1_i4.path1	novel.8009	TRINITY_DN78750_c0_g1_i1.path1	novel.3512
TRINITY_DN15952_c1_g1_i2.path2	TRINITY_DN61508_c0_g1_i1.path1	TRINITY_DN16585_c0_g1_i1.path1	Pepsico2_Contig5143.path1
TRINITY_DN15885_c0_g1_i1.path2	TRINITY_DN7357_c0_g2_i1.path1	TRINITY_DN12548_c0_g1_i3.path1	Pepsico1_Contig6110.path1
TRINITY_DN80635_c0_g1_i1.path1	TRINITY_DN49408_c0_g1_i1.path1	TRINITY_DN6421_c0_g1_i4.path1	novel.6460
TRINITY_DN6817_c2_g1_i1.path1	TRINITY_DN20397_c0_g1_i1.path1	Pepsico1_Contig5974.path1	TRINITY_DN27388_c0_g3_i3.path1
Pepsico2_Contig11017.path1	Pepsico2_Contig14826.path1	TRINITY_DN4360_c2_g1_i3.path2	TRINITY_DN9392_c0_g1_i5.path1
Pepsico2_Contig12076.path1	Pepsico2_Contig6839.path1	Pepsico2_Contig7794.path1	novel.6107
TRINITY_DN39412_c0_g1_i1.path2	TRINITY_DN43050_c0_g1_i1.path1	novel.10140	Pepsico2_Contig8591.path1
Pepsico2_Contig4567.path1	Pepsico2_Contig2358.path1	Pepsico2_Contig20182.path1	TRINITY_DN11017_c0_g2_i4.path3
TRINITY_DN8505_c0_g1_i1.path2	TRINITY_DN5235_c0_g2_i1.path1	TRINITY_DN23079_c0_g1_i1.path2	TRINITY_DN8715_c0_g1_i2.path2
novel.9110	novel.5050	TRINITY_DN23579_c0_g1_i1.path1	novel.2765
TRINITY_DN74489_c0_g1_i1.path1	Pepsico1_Contig805.path1	novel.5617	TRINITY_DN55806_c0_g1_i1.path1
Pepsico2_Contig12502.path1	novel.121	TRINITY_DN19058_c0_g1_i1.path1	TRINITY_DN5662_c0_g1_i3.path1
Pepsico2_Contig11654.path1	novel.1098	novel.8383	TRINITY_DN3106_c1_g1_i1.path1
novel.6794	TRINITY_DN35789_c0_g1_i1.path2	novel.4381	Pepsico2_Contig7604.path1
Pepsico2_Contig20515.path1	TRINITY_DN2098_c1_g1_i5.path1	Pepsico2_Contig18542.path1	novel.2116
TRINITY_DN25378_c0_g1_i1.path1	Pepsico1_Contig1941.path1	TRINITY_DN7005_c0_g1_i4.path1	Pepsico2_Contig19467.path1
TRINITY_DN108916_c0_g1_i1.path1	TRINITY_DN40344_c0_g1_i1.path1	TRINITY_DN10389_c0_g1_i1.path2	TRINITY_DN108916_c0_g1_i1.path1
Pepsico2_Contig4658.path1	novel.3056	TRINITY_DN25384_c0_g2_i1.path3	TRINITY_DN35752_c0_g1_i2.path1
TRINITY_DN23754_c0_g3_i1.path1	novel.4637	novel.5700	TRINITY_DN37972_c0_g1_i2.path1
TRINITY_DN19722_c0_g1_i1.path1	Pepsico2_Contig11065.path1	TRINITY_DN49805_c0_g1_i1.path2	Pepsico2_Contig3799.path1
novel.6689	Pepsico1_Contig4939.path2	novel.7610	novel.2712
TRINITY_DN4827_c1_g1_i1.path2	TRINITY_DN23121_c0_g2_i1.path2	Pepsico2_Contig19604.path1	Pepsico2_Contig1744.path1
Pepsico2_Contig14932.path1	novel.4248	TRINITY_DN19150_c0_g1_i2.path1	TRINITY_DN23948_c0_g2_i1.path1
TRINITY_DN55197_c0_g1_i1.path1	TRINITY_DN4502_c0_g2_i1.path1	Pepsico2_Contig6161.path1	novel.10231
TRINITY_DN10190_c0_g1_i5.path1	Pepsico2_Contig8195.path1	TRINITY_DN30653_c0_g1_i1.path1	TRINITY_DN35718_c0_g2_i4.path1
TRINITY_DN6230_c1_g1_i1.path2	novel.4044	Pepsico2_Contig2197.path2	novel.9333
TRINITY_DN79675_c0_g1_i1.path1	novel.1481	TRINITY_DN40112_c0_g1_i1.path1	Pepsico2_Contig7773.path1
TRINITY_DN6909_c0_g1_i6.path1	Pepsico1_Contig28191.path1	TRINITY_DN6846_c1_g1_i1.path1	TRINITY_DN7216_c1_g2_i1.path1
Pepsico2_Contig18121.path1	TRINITY_DN4132_c1_g1_i1.path1	TRINITY_DN1454_c0_g1_i1.path1	TRINITY_DN20956_c0_g1_i1.path1
TRINITY_DN11083_c0_g1_i15.path1	TRINITY_DN20775_c0_g1_i3.path2	Pepsico1_Contig1511.path1	TRINITY_DN4780_c1_g1_i1.path1
TRINITY_DN78411_c0_g1_i1.path1	TRINITY_DN17812_c0_g1_i4.path2	novel.3990	TRINITY_DN1122_c0_g2_i1.path1
TRINITY_DN15377_c0_g1_i2.path1	TRINITY_DN14296_c0_g2_i1.path1	novel.5042	Pepsico1_Contig1064.path2
novel.6999	TRINITY_DN22284_c0_g2_i1.path1	Pepsico2_Contig7773.path1	novel.4932
novel.1118	Pepsico2_Contig6462.path2	TRINITY_DN4289_c0_g2_i1.path1	Pepsico2_Contig13626.path1
TRINITY_DN8414_c0_g1_i2.path1	Pepsico1_Contig1896.path1	novel.5385	Pepsico1_Contig1891.path1
TRINITY_DN91407_c0_g1_i1.path1	TRINITY_DN1201_c2_g1_i2.path1	TRINITY_DN3337_c0_g1_i3.path2	TRINITY_DN320_c0_g1_i1.path1
TRINITY_DN98960_c0_g1_i1.path1	TRINITY_DN20414_c0_g2_i1.path1	novel.5362	TRINITY_DN16045_c1_g1_i4.path1
Pepsico2_Contig13004.path1	novel.4572	novel.6272	TRINITY_DN1459_c0_g2_i3.path1
TRINITY_DN9851_c0_g1_i1.path1	TRINITY_DN61900_c0_g2_i1.path1	Pepsico1_Contig346.path1	novel.5145
TRINITY_DN76151_c0_g1_i1.path1	novel.6605	Pepsico2_Contig1768.path1	novel.7991
Pepsico1_Contig239.path1	TRINITY_DN36267_c0_g1_i2.path1	novel.3521	Pepsico1_Contig1878.path1
novel.1756	novel.8410	Pepsico2_Contig6237.path1	TRINITY_DN6454_c0_g2_i1.path1
Pepsico1_Contig2161.path2	TRINITY_DN648_c1_g1_i8.path1	novel.5457	novel.1377
TRINITY_DN11951_c0_g1_i1.path1	TRINITY_DN13254_c1_g1_i1.path1	Pepsico2_Contig19708.path1	TRINITY_DN15215_c0_g3_i1.path2
TRINITY_DN15598_c0_g1_i4.path4	Pepsico1_Contig4517.path1	TRINITY_DN11954_c0_g1_i6.path2	Pepsico1_Contig2079.path1
novel.3370	Pepsico2_Contig17145.path1	TRINITY_DN33707_c0_g1_i5.path1	novel.1229
TRINITY_DN17359_c0_g5_i1.path2	TRINITY_DN9129_c0_g1_i1.path2	TRINITY_DN8715_c0_g1_i2.path2	TRINITY_DN3271_c0_g1_i4.path3
Pepsico1_Contig3912.path1	novel.5900	novel.4164	Pepsico2_Contig4732.path1
TRINITY_DN23689_c0_g1_i1.path1	Pepsico1_Contig2674.path1	TRINITY_DN27339_c0_g1_i1.path1	TRINITY_DN24212_c0_g1_i1.path1
TRINITY_DN97221_c0_g1_i1.path1	Pepsico1_Contig264.path1	TRINITY_DN5321_c0_g1_i10.path2	Pepsico2_Contig17958.path1
novel.6104	TRINITY_DN1201_c0_g1_i3.path1	novel.4474	TRINITY_DN16663_c1_g1_i1.path2
TRINITY_DN36052_c0_g1_i1.path1	novel.9659	Pepsico1_Contig1725.path1	TRINITY_DN17093_c0_g1_i1.path1
novel.5438	TRINITY_DN10873_c0_g2_i1.path1	novel.9687	TRINITY_DN16767_c0_g1_i2.path1
TRINITY_DN20956_c0_g1_i1.path1	Pepsico2_Contig3750.path2	TRINITY_DN16373_c0_g2_i1.path1	TRINITY_DN23468_c0_g1_i2.path2
Pepsico1_Contig35521.path1	Pepsico1_Contig14950.path1	TRINITY_DN17397_c0_g1_i2.path1	novel.9624
TRINITY_DN50836_c0_g1_i1.path1	Pepsico2_Contig2300.path1	TRINITY_DN16373_c0_g1_i1.path1	novel.8191
TRINITY_DN40462_c0_g1_i1.path3	TRINITY_DN113966_c0_g1_i1.path1	Pepsico1_Contig1034.path1	TRINITY_DN9582_c0_g1_i1.path1
TRINITY_DN90454_c0_g1_i1.path1	Pepsico2_Contig2492.path1	TRINITY_DN29095_c0_g1_i2.path1	TRINITY_DN249_c1_g1_i1.path1
TRINITY_DN43807_c0_g1_i2.path1	TRINITY_DN29788_c0_g1_i1.path1	novel.9333	novel.1155
TRINITY_DN40927_c0_g1_i3.path2	TRINITY_DN15407_c0_g1_i3.path1	Pepsico2_Contig3011.path2	TRINITY_DN10242_c0_g1_i5.path2
Pepsico2_Contig19380.path1	Pepsico2_Contig6456.path1	Pepsico2_Contig20105.path1	TRINITY_DN12381_c0_g1_i1.path1
Pepsico2_Contig7177.path1	TRINITY_DN108772_c0_g1_i1.path1	TRINITY_DN24347_c0_g1_i2.path1	TRINITY_DN61132_c0_g1_i1.path1
Pepsico2_Contig19114.path1	TRINITY_DN13270_c0_g1_i2.path1	novel.6107	TRINITY_DN35046_c0_g2_i1.path1
novel.942	TRINITY_DN33314_c0_g1_i1.path5	TRINITY_DN8444_c0_g1_i4.path1	novel.8626
novel.6158	novel.6126	Pepsico2_Contig17563.path2	TRINITY_DN89105_c0_g1_i1.path1
TRINITY_DN10853_c0_g1_i1.path1	novel.8037	Pepsico1_Contig24970.path1	novel.5347
novel.7321	novel.8493	TRINITY_DN38217_c0_g1_i1.path1	TRINITY_DN38217_c0_g1_i1.path1
Pepsico2_Contig1434.path1	novel.9397	TRINITY_DN8969_c0_g1_i5.path2	TRINITY_DN38179_c0_g1_i1.path1
Pepsico1_Contig342.path1	Pepsico2_Contig668.path1	TRINITY_DN12603_c0_g1_i2.path1	TRINITY_DN10738_c0_g2_i1.path2
TRINITY_DN24886_c0_g1_i8.path1	TRINITY_DN18264_c0_g1_i3.path1	TRINITY_DN7521_c0_g1_i1.path1	Pepsico1_Contig28355.path1
Pepsico2_Contig20048.path1	Pepsico1_Contig5029.path1	TRINITY_DN28026_c0_g1_i1.path1	Pepsico1_Contig526.path2
novel.10172	Pepsico2_Contig791.path1	novel.9972	novel.2226
TRINITY_DN35046_c0_g2_i1.path1	TRINITY_DN1945_c0_g1_i3.path1	Pepsico1_Contig3357.path1	TRINITY_DN34195_c0_g1_i2.path1
TRINITY_DN6065_c0_g3_i1.path1	TRINITY_DN10806_c1_g2_i8.path2	Pepsico1_Contig47.path1	novel.7357
TRINITY_DN1105_c1_g2_i1.path1	TRINITY_DN5816_c1_g1_i1.path1	TRINITY_DN16572_c0_g1_i1.path1	Pepsico2_Contig17023.path1
novel.6219	novel.5323	novel.6711	TRINITY_DN42172_c0_g1_i1.path2
Pepsico2_Contig1448.path1	TRINITY_DN15959_c0_g1_i1.path1	TRINITY_DN11150_c1_g2_i1.path1	novel.5132
novel.7515	TRINITY_DN13022_c0_g1_i1.path1	Pepsico2_Contig13783.path1	novel.4929
TRINITY_DN106262_c0_g1_i1.path1	TRINITY_DN88045_c0_g1_i1.path1	TRINITY_DN30789_c0_g2_i1.path2	TRINITY_DN44861_c0_g1_i1.path1
Pepsico2_Contig8532.path1	TRINITY_DN324_c0_g2_i1.path1	TRINITY_DN34195_c0_g1_i2.path2	Pepsico2_Contig15617.path1
TRINITY_DN10547_c0_g1_i17.path1	TRINITY_DN52841_c0_g1_i1.path1	TRINITY_DN5536_c1_g1_i4.path2	Pepsico2_Contig13651.path1
TRINITY_DN13217_c0_g1_i1.path1	TRINITY_DN3156_c0_g1_i5.path3	TRINITY_DN52891_c0_g1_i1.path1	TRINITY_DN3070_c1_g1_i2.path1
TRINITY_DN11593_c1_g1_i7.path1	novel.7991	TRINITY_DN3337_c0_g1_i3.path1	TRINITY_DN15011_c0_g1_i1.path1
TRINITY_DN88261_c0_g1_i1.path1	novel.5839	TRINITY_DN14737_c0_g1_i1.path2	TRINITY_DN7412_c0_g1_i1.path1
TRINITY_DN19173_c0_g1_i3.path2	Pepsico1_Contig788.path1	TRINITY_DN42172_c0_g1_i1.path2	TRINITY_DN19341_c0_g1_i1.path2
Pepsico2_Contig18542.path1	novel.329	Pepsico2_Contig1967.path1	Pepsico2_Contig11667.path1
TRINITY_DN9750_c0_g1_i6.path1	Pepsico2_Contig17883.path1	TRINITY_DN29271_c0_g1_i2.path3	TRINITY_DN26227_c0_g1_i2.path1
novel.4363	novel.2151	Pepsico1_Contig1649.path1	TRINITY_DN8353_c0_g1_i1.path1
TRINITY_DN32683_c0_g1_i1.path1	novel.2082	TRINITY_DN13294_c1_g1_i1.path1	TRINITY_DN4_c0_g1_i6.path2
TRINITY_DN3623_c1_g1_i3.path1	TRINITY_DN11198_c0_g1_i5.path1	TRINITY_DN24030_c0_g1_i1.path1	TRINITY_DN21011_c0_g1_i7.path1
TRINITY_DN89147_c0_g1_i1.path1	novel.2601	TRINITY_DN1019_c0_g2_i1.path1	TRINITY_DN43808_c0_g4_i1.path1
novel.739	novel.51	Pepsico1_Contig1271.path2	TRINITY_DN3543_c0_g3_i1.path1
Pepsico1_Contig1670.path1	novel.9720	novel.9838	Pepsico1_Contig585.path1
Pepsico2_Contig17839.path1	TRINITY_DN14238_c1_g1_i1.path1	Pepsico2_Contig7604.path1	Pepsico1_Contig1433.path1
novel.10203	TRINITY_DN8832_c1_g1_i2.path1	TRINITY_DN7178_c0_g2_i1.path1	novel.5551
novel.3143	novel.4684	Pepsico1_Contig1479.path1	Pepsico2_Contig3476.path1
TRINITY_DN11275_c0_g1_i2.path1	novel.2005	novel.9764	TRINITY_DN34723_c0_g1_i1.path1
TRINITY_DN31707_c0_g3_i9.path1	Pepsico2_Contig19669.path2	novel.9716	novel.4924
Pepsico2_Contig13023.path1	novel.645	TRINITY_DN27388_c0_g3_i3.path1	TRINITY_DN8444_c0_g1_i4.path1
TRINITY_DN11897_c0_g1_i1.path1	TRINITY_DN8392_c0_g1_i2.path1	novel.4631	TRINITY_DN6538_c0_g1_i1.path1
novel.1447	novel.4436	Pepsico2_Contig19649.path2	TRINITY_DN11302_c0_g1_i3.path1
novel.857	Pepsico1_Contig526.path1	TRINITY_DN23428_c0_g1_i1.path1	Pepsico2_Contig19649.path2
TRINITY_DN26227_c0_g1_i2.path1	TRINITY_DN15092_c0_g1_i1.path1	TRINITY_DN4360_c2_g1_i3.path1	Pepsico1_Contig28749.path1
TRINITY_DN71196_c0_g1_i1.path1	TRINITY_DN4207_c0_g1_i1.path1	Pepsico2_Contig17803.path1	TRINITY_DN22584_c0_g2_i1.path1
TRINITY_DN108478_c0_g1_i1.path4	TRINITY_DN15952_c1_g1_i2.path2	TRINITY_DN36019_c1_g1_i1.path1	TRINITY_DN10471_c0_g3_i1.path1
Pepsico2_Contig13838.path2	Pepsico1_Contig6629.path1	TRINITY_DN22012_c1_g1_i1.path1	Pepsico2_Contig6463.path1
TRINITY_DN20597_c0_g1_i1.path1	TRINITY_DN65510_c0_g1_i1.path1	TRINITY_DN59891_c1_g1_i2.path1	TRINITY_DN8683_c0_g1_i1.path2
TRINITY_DN82631_c0_g1_i1.path2	TRINITY_DN64549_c0_g1_i1.path1	TRINITY_DN19092_c0_g1_i1.path1	novel.8801
Pepsico1_Contig3412.path1	TRINITY_DN6907_c0_g1_i2.path1	novel.5005	TRINITY_DN50736_c0_g2_i1.path1
novel.6990	TRINITY_DN38896_c0_g1_i1.path1	novel.1626	TRINITY_DN19720_c0_g1_i1.path1
TRINITY_DN71450_c0_g1_i1.path1	TRINITY_DN17093_c0_g1_i1.path2	TRINITY_DN109604_c0_g1_i1.path1	TRINITY_DN46317_c0_g1_i1.path2
novel.575	novel.6139	TRINITY_DN11613_c0_g1_i1.path1	novel.9649
TRINITY_DN37640_c0_g1_i1.path1	novel.2822	TRINITY_DN18259_c0_g1_i1.path1	TRINITY_DN19092_c0_g2_i1.path1
Pepsico1_Contig27291.path1	TRINITY_DN754_c0_g1_i2.path1	TRINITY_DN27219_c0_g1_i7.path1	TRINITY_DN11181_c0_g1_i3.path1
TRINITY_DN17530_c0_g1_i1.path3	Pepsico2_Contig20015.path1	Pepsico2_Contig17052.path1	TRINITY_DN22012_c1_g1_i1.path1
TRINITY_DN2365_c0_g1_i15.path2	TRINITY_DN14296_c0_g1_i1.path1	TRINITY_DN606_c0_g1_i1.path1	Pepsico1_Contig2047.path1
novel.4911	TRINITY_DN26083_c0_g1_i3.path1	novel.7197	TRINITY_DN15239_c0_g1_i10.path1
Pepsico2_Contig14825.path1	Pepsico1_Contig1433.path1	Pepsico1_Contig1433.path1	novel.2079
TRINITY_DN16244_c0_g1_i2.path1	novel.1568	Pepsico2_Contig1790.path2	TRINITY_DN10389_c0_g1_i1.path2
Pepsico2_Contig19142.path1	TRINITY_DN111593_c0_g1_i1.path1	Pepsico2_Contig21049.path1	TRINITY_DN9890_c0_g1_i6.path2
TRINITY_DN7279_c0_g1_i1.path1	novel.9913	TRINITY_DN35046_c0_g2_i1.path1	novel.239
novel.7171	novel.9338	TRINITY_DN52160_c0_g1_i1.path1	TRINITY_DN24316_c0_g2_i1.path1
Pepsico2_Contig13626.path1	TRINITY_DN34759_c0_g2_i1.path1	TRINITY_DN9952_c0_g3_i1.path1	Pepsico2_Contig20023.path1
TRINITY_DN8122_c0_g1_i5.path1	novel.1981	novel.7051	Pepsico1_Contig33714.path1
Pepsico2_Contig3750.path1	Pepsico1_Contig1393.path1	TRINITY_DN57668_c0_g1_i1.path1	TRINITY_DN6817_c0_g2_i1.path1
TRINITY_DN310_c1_g1_i3.path1	TRINITY_DN7830_c0_g2_i1.path1	TRINITY_DN363_c0_g1_i5.path1	TRINITY_DN14904_c0_g1_i1.path1
TRINITY_DN26905_c0_g1_i1.path1	novel.4908	TRINITY_DN26045_c0_g1_i4.path1	novel.3212
novel.7083	novel.7010	Pepsico2_Contig9003.path1	Pepsico2_Contig10474.path1
TRINITY_DN10100_c0_g3_i7.path2	Pepsico2_Contig13004.path1	novel.2226	TRINITY_DN11161_c0_g1_i5.path1
Pepsico1_Contig32979.path1	TRINITY_DN13350_c0_g1_i1.path1	TRINITY_DN80132_c0_g1_i1.path1	TRINITY_DN10242_c0_g1_i5.path1
TRINITY_DN78583_c0_g1_i1.path2	Pepsico2_Contig3011.path2	Pepsico2_Contig15621.path2	TRINITY_DN3634_c0_g1_i4.path1
novel.3254	novel.7047	TRINITY_DN249_c1_g1_i1.path1	TRINITY_DN22103_c0_g1_i1.path1
TRINITY_DN1827_c0_g2_i1.path1	TRINITY_DN88261_c0_g1_i1.path1	TRINITY_DN36833_c1_g1_i1.path1	novel.5848
TRINITY_DN11615_c0_g1_i1.path1	TRINITY_DN9377_c0_g1_i1.path1	TRINITY_DN16045_c1_g1_i4.path2	novel.7441
TRINITY_DN19058_c0_g1_i1.path1	TRINITY_DN59891_c1_g1_i2.path1	TRINITY_DN40411_c0_g1_i1.path1	TRINITY_DN28511_c0_g1_i5.path1
TRINITY_DN35651_c0_g1_i1.path1	TRINITY_DN6909_c0_g1_i6.path2	TRINITY_DN19018_c0_g1_i1.path1	TRINITY_DN17168_c0_g3_i1.path2
TRINITY_DN19031_c1_g1_i1.path1	TRINITY_DN5876_c0_g2_i1.path2	TRINITY_DN60733_c0_g1_i1.path2	Pepsico2_Contig4539.path1
TRINITY_DN79961_c0_g1_i1.path1	novel.8818	Pepsico1_Contig720.path1	TRINITY_DN10738_c0_g2_i1.path1
TRINITY_DN13350_c1_g1_i6.path1	TRINITY_DN69825_c0_g1_i1.path1	TRINITY_DN9573_c0_g1_i7.path1	Pepsico2_Contig1104.path1
novel.8257	TRINITY_DN42172_c0_g1_i1.path2	TRINITY_DN8353_c0_g1_i1.path1	novel.1031
TRINITY_DN11147_c0_g1_i1.path2	novel.9060	novel.5395	Pepsico1_Contig1896.path1
Pepsico2_Contig4539.path1	novel.8161	TRINITY_DN5199_c0_g2_i1.path1	TRINITY_DN4812_c0_g1_i1.path1
Pepsico2_Contig15460.path1	Pepsico2_Contig3750.path1	TRINITY_DN21607_c0_g3_i3.path1	novel.7885
TRINITY_DN16257_c1_g1_i5.path1	Pepsico2_Contig10795.path2	novel.1630	TRINITY_DN40344_c0_g1_i1.path1
TRINITY_DN22412_c0_g1_i1.path1	TRINITY_DN1917_c0_g1_i1.path1	TRINITY_DN34243_c1_g1_i1.path1	TRINITY_DN8969_c0_g1_i5.path2
TRINITY_DN15407_c0_g1_i3.path1	Pepsico1_Contig964.path1	TRINITY_DN96580_c0_g1_i1.path1	Pepsico1_Contig1064.path1
novel.7876	TRINITY_DN90454_c0_g1_i1.path1	Pepsico1_Contig473.path1	TRINITY_DN20292_c1_g1_i1.path1
novel.1074	TRINITY_DN9230_c0_g1_i2.path2	Pepsico1_Contig1860.path1	TRINITY_DN4289_c0_g2_i1.path1
Pepsico1_Contig805.path1	novel.9279	Pepsico2_Contig2202.path1	Pepsico2_Contig13147.path1
TRINITY_DN9886_c0_g1_i1.path1	TRINITY_DN33151_c0_g1_i1.path1	TRINITY_DN9696_c0_g1_i1.path2	TRINITY_DN15407_c0_g1_i3.path1
Pepsico2_Contig8789.path1	TRINITY_DN24281_c0_g1_i3.path1	TRINITY_DN8832_c1_g1_i2.path1	TRINITY_DN14061_c0_g2_i1.path2
TRINITY_DN253_c0_g2_i12.path1	TRINITY_DN6999_c0_g2_i1.path1	TRINITY_DN11005_c1_g1_i2.path1	novel.5260
Pepsico1_Contig1620.path2	Pepsico2_Contig17149.path1	TRINITY_DN15420_c0_g1_i4.path1	novel.1603
TRINITY_DN83464_c0_g1_i1.path1	Pepsico1_Contig3912.path1	Pepsico2_Contig12692.path5	Pepsico2_Contig15621.path2
TRINITY_DN35651_c0_g2_i2.path1	TRINITY_DN106711_c0_g1_i1.path1	Pepsico2_Contig9464.path1	Pepsico2_Contig4423.path1
TRINITY_DN11271_c0_g1_i3.path2	TRINITY_DN107608_c0_g1_i1.path1	Pepsico2_Contig6486.path1	TRINITY_DN4437_c0_g1_i2.path2
TRINITY_DN6817_c0_g2_i1.path1	Pepsico2_Contig8781.path1	TRINITY_DN13991_c0_g2_i3.path1	TRINITY_DN362_c0_g2_i2.path2
TRINITY_DN10620_c0_g1_i4.path1	TRINITY_DN30268_c0_g3_i2.path1	TRINITY_DN14061_c0_g2_i1.path2	TRINITY_DN32968_c0_g1_i1.path1
TRINITY_DN10346_c0_g1_i2.path1	novel.8296	Pepsico2_Contig3282.path2	novel.2183
novel.7636	novel.4115	TRINITY_DN9393_c0_g1_i1.path1	TRINITY_DN6989_c0_g1_i1.path1
novel.603	Pepsico2_Contig7604.path1	Pepsico1_Contig7054.path2	TRINITY_DN38078_c0_g1_i1.path1
TRINITY_DN8096_c0_g1_i4.path1	TRINITY_DN53491_c0_g1_i3.path1	TRINITY_DN10242_c0_g1_i5.path2	TRINITY_DN8283_c0_g1_i1.path2
TRINITY_DN28418_c0_g1_i5.path1	TRINITY_DN8756_c9_g1_i1.path3	TRINITY_DN7357_c0_g1_i1.path1	TRINITY_DN3337_c0_g1_i3.path2
TRINITY_DN46281_c0_g1_i1.path3	novel.10107	novel.4975	Pepsico1_Contig47.path1
novel.3674	novel.9752	TRINITY_DN14594_c0_g2_i1.path1	novel.193
novel.2145	novel.9972	TRINITY_DN11717_c0_g2_i2.path1	TRINITY_DN18179_c0_g2_i1.path2
TRINITY_DN549_c0_g1_i4.path1	TRINITY_DN38220_c0_g1_i2.path1	Pepsico2_Contig10893.path2	novel.2801
TRINITY_DN18372_c0_g1_i1.path1	novel.8523	TRINITY_DN18168_c0_g1_i2.path1	TRINITY_DN8233_c0_g3_i1.path1
TRINITY_DN4207_c0_g1_i1.path1	TRINITY_DN10437_c0_g1_i2.path1	TRINITY_DN32487_c0_g1_i2.path1	TRINITY_DN12400_c0_g1_i9.path1
novel.4050	TRINITY_DN58767_c0_g1_i1.path1	novel.6126	TRINITY_DN27955_c0_g1_i1.path1
TRINITY_DN11005_c1_g1_i2.path1	TRINITY_DN21547_c0_g2_i1.path2	Pepsico1_Contig97.path1	TRINITY_DN14545_c0_g1_i1.path2
TRINITY_DN35060_c1_g1_i1.path1	TRINITY_DN10286_c0_g1_i2.path1	TRINITY_DN22064_c0_g2_i1.path1	TRINITY_DN859_c0_g4_i1.path1
novel.4987	Pepsico1_Contig35521.path2	TRINITY_DN4885_c0_g3_i1.path1	TRINITY_DN19250_c0_g1_i1.path1
TRINITY_DN15406_c0_g1_i1.path1	TRINITY_DN99656_c0_g1_i1.path1	Pepsico2_Contig16749.path1	TRINITY_DN2053_c0_g1_i15.path1
novel.1879	Pepsico1_Contig4996.path1	TRINITY_DN32994_c0_g1_i1.path1	Pepsico2_Contig16982.path2
novel.645	TRINITY_DN21346_c0_g1_i2.path1	Pepsico1_Contig4198.path2	TRINITY_DN4484_c1_g1_i2.path1
novel.2601	TRINITY_DN52375_c0_g1_i2.path1	novel.1781	TRINITY_DN24347_c0_g1_i2.path1
TRINITY_DN16411_c0_g1_i5.path1	TRINITY_DN80397_c0_g1_i1.path1	Pepsico2_Contig5930.path2	TRINITY_DN15613_c0_g1_i3.path3
TRINITY_DN3062_c2_g1_i2.path1	TRINITY_DN33475_c0_g1_i2.path1	Pepsico2_Contig7605.path1	novel.9687
novel.558	TRINITY_DN47629_c0_g1_i1.path1	TRINITY_DN30939_c0_g1_i2.path1	TRINITY_DN5135_c0_g1_i1.path1
TRINITY_DN6572_c0_g1_i5.path1	TRINITY_DN22438_c0_g2_i1.path1	Pepsico2_Contig19818.path1	TRINITY_DN15791_c0_g1_i1.path2
TRINITY_DN40416_c0_g1_i1.path3	TRINITY_DN6929_c1_g1_i4.path1	novel.2712	Pepsico2_Contig4727.path1
novel.9282	TRINITY_DN14103_c0_g1_i5.path1	TRINITY_DN15215_c0_g3_i1.path2	novel.7472
novel.5299	Pepsico1_Contig1534.path1	TRINITY_DN78849_c0_g1_i1.path1	Pepsico1_Contig5974.path1
TRINITY_DN45877_c0_g1_i1.path1	TRINITY_DN31278_c0_g1_i1.path1	novel.1229	TRINITY_DN32487_c0_g1_i2.path1
TRINITY_DN95125_c0_g1_i1.path1	Pepsico1_Contig35521.path1	novel.8779	novel.7184
novel.3240	Pepsico2_Contig14670.path1	Pepsico1_Contig3567.path1	Pepsico1_Contig886.path1
TRINITY_DN17319_c0_g1_i7.path2	TRINITY_DN2145_c0_g1_i1.path1	TRINITY_DN40354_c0_g1_i2.path1	TRINITY_DN18179_c0_g1_i5.path2
Pepsico1_Contig1577.path1	TRINITY_DN5536_c1_g1_i4.path2	TRINITY_DN37934_c0_g1_i3.path1	novel.9574
novel.9038	Pepsico2_Contig18160.path1	TRINITY_DN10561_c0_g1_i1.path1	TRINITY_DN5602_c0_g1_i1.path1
TRINITY_DN70511_c0_g1_i1.path1	TRINITY_DN58518_c0_g2_i1.path1	novel.4050	Pepsico1_Contig1029.path2
Pepsico2_Contig12716.path1	novel.1288	TRINITY_DN6025_c0_g1_i12.path1	Pepsico1_Contig1860.path1
TRINITY_DN91140_c0_g1_i1.path2	novel.4363	novel.6954	novel.7086
TRINITY_DN8756_c9_g1_i1.path3	TRINITY_DN23100_c0_g1_i1.path1	novel.9736	TRINITY_DN43075_c0_g1_i2.path2
TRINITY_DN99572_c0_g1_i1.path1	novel.8747	TRINITY_DN6065_c0_g1_i2.path1	TRINITY_DN277_c2_g1_i1.path3
novel.8630	Pepsico2_Contig19596.path1	TRINITY_DN10242_c0_g1_i5.path1	novel.8351
TRINITY_DN8137_c0_g1_i1.path1	TRINITY_DN5609_c0_g1_i1.path2	TRINITY_DN29620_c0_g2_i1.path1	TRINITY_DN5591_c0_g1_i3.path1
TRINITY_DN88673_c0_g1_i1.path1	TRINITY_DN35686_c0_g2_i1.path1	TRINITY_DN75757_c0_g1_i1.path1	TRINITY_DN9890_c0_g1_i6.path1
TRINITY_DN4885_c0_g4_i1.path1	TRINITY_DN106906_c0_g1_i1.path1	TRINITY_DN22881_c0_g1_i4.path2	TRINITY_DN15198_c0_g1_i2.path2
Pepsico2_Contig4950.path1	TRINITY_DN1827_c0_g2_i1.path1	Pepsico2_Contig21203.path1	TRINITY_DN21050_c0_g1_i1.path1
Pepsico2_Contig836.path1	TRINITY_DN31463_c0_g1_i1.path1	TRINITY_DN43075_c0_g1_i2.path1	Pepsico2_Contig7984.path2
TRINITY_DN18326_c0_g1_i2.path1	TRINITY_DN7656_c0_g1_i1.path1	TRINITY_DN45570_c0_g1_i1.path1	novel.2855
TRINITY_DN6293_c0_g1_i1.path1	novel.739	TRINITY_DN56186_c0_g1_i1.path2	TRINITY_DN29271_c0_g1_i2.path3
Pepsico1_Contig7006.path1	TRINITY_DN5904_c0_g1_i3.path1	TRINITY_DN26200_c0_g1_i1.path1	Pepsico2_Contig8.path1
Pepsico2_Contig2618.path1	novel.9245	Pepsico2_Contig836.path1	Pepsico2_Contig12726.path1
TRINITY_DN5876_c1_g1_i1.path1	TRINITY_DN4812_c0_g2_i2.path1	novel.10172	TRINITY_DN1201_c0_g1_i3.path1
TRINITY_DN55504_c0_g1_i1.path1	TRINITY_DN36731_c0_g1_i1.path2	Pepsico2_Contig19393.path1	TRINITY_DN18161_c0_g1_i10.path1
TRINITY_DN66377_c0_g1_i1.path1	novel.9427	Pepsico2_Contig18357.path1	Pepsico2_Contig18269.path1
TRINITY_DN13645_c0_g2_i1.path2	TRINITY_DN29796_c0_g1_i1.path1	TRINITY_DN1917_c0_g1_i1.path1	Pepsico2_Contig3465.path1
TRINITY_DN12045_c0_g1_i2.path1	TRINITY_DN28452_c0_g1_i8.path1	TRINITY_DN108824_c0_g1_i1.path1	TRINITY_DN15210_c0_g1_i2.path1
novel.5625	novel.1175	TRINITY_DN23943_c0_g5_i1.path1	novel.942
TRINITY_DN48930_c0_g1_i1.path1	Pepsico1_Contig52.path2	novel.4248	Pepsico2_Contig9084.path1
TRINITY_DN27817_c0_g1_i1.path1	Pepsico2_Contig3282.path2	TRINITY_DN14620_c0_g1_i2.path1	TRINITY_DN18264_c0_g1_i3.path1
Pepsico2_Contig13099.path1	Pepsico2_Contig16941.path1	Pepsico2_Contig7839.path2	TRINITY_DN19900_c0_g2_i1.path1
novel.546	Pepsico2_Contig3845.path1	novel.2134	TRINITY_DN10325_c0_g2_i1.path1
novel.2683	TRINITY_DN40757_c0_g1_i2.path1	TRINITY_DN13830_c1_g1_i1.path1	TRINITY_DN21860_c0_g3_i2.path3
TRINITY_DN99812_c0_g1_i1.path1	TRINITY_DN27295_c0_g1_i1.path1	novel.1742	Pepsico2_Contig17052.path1
Pepsico2_Contig3537.path2	novel.2575	TRINITY_DN16114_c0_g1_i3.path1	TRINITY_DN23852_c0_g1_i1.path1
TRINITY_DN23428_c0_g1_i1.path1	novel.2850	Pepsico2_Contig9173.path1	TRINITY_DN13000_c0_g2_i2.path1
Pepsico1_Contig5029.path1	TRINITY_DN26045_c0_g1_i4.path1	TRINITY_DN13621_c0_g1_i1.path1	Pepsico2_Contig19649.path1
Pepsico2_Contig19497.path1	TRINITY_DN17801_c0_g1_i4.path1	TRINITY_DN32968_c0_g1_i1.path1	novel.8044
novel.6558	Pepsico2_Contig4420.path1	TRINITY_DN10738_c0_g2_i1.path2	TRINITY_DN15577_c0_g1_i4.path2
Pepsico2_Contig10308.path1	Pepsico2_Contig13689.path3	TRINITY_DN38775_c0_g1_i1.path1	TRINITY_DN9201_c0_g1_i1.path1
TRINITY_DN35752_c0_g1_i2.path1	TRINITY_DN18153_c0_g2_i1.path4	Pepsico1_Contig28824.path2	novel.1005
novel.7137	TRINITY_DN48093_c0_g1_i1.path1	Pepsico2_Contig20023.path1	Pepsico2_Contig14140.path1
TRINITY_DN5144_c0_g1_i8.path2	TRINITY_DN21752_c0_g1_i2.path2	TRINITY_DN32603_c0_g1_i1.path1	novel.6691
Pepsico2_Contig12914.path2	TRINITY_DN29095_c0_g1_i2.path1	novel.8756	novel.8294
novel.1138	novel.10203	Pepsico2_Contig13651.path1	TRINITY_DN9377_c0_g1_i1.path1
TRINITY_DN2756_c0_g1_i2.path1	TRINITY_DN13645_c0_g2_i1.path1	novel.2921	TRINITY_DN8516_c0_g1_i1.path1
TRINITY_DN22824_c0_g2_i1.path1	TRINITY_DN44006_c0_g1_i1.path1	TRINITY_DN11349_c0_g1_i2.path2	Pepsico2_Contig6486.path1
TRINITY_DN11593_c1_g1_i7.path2	TRINITY_DN14943_c0_g4_i1.path1	TRINITY_DN14943_c0_g1_i1.path2	novel.6786
Pepsico1_Contig3571.path1	Pepsico2_Contig17137.path1	TRINITY_DN90454_c0_g1_i1.path1	TRINITY_DN4502_c0_g2_i1.path1
novel.9436	novel.9321	novel.4684	TRINITY_DN62134_c5_g1_i1.path1
TRINITY_DN33314_c0_g1_i1.path4	TRINITY_DN27316_c0_g1_i2.path1	Pepsico1_Contig1404.path1	TRINITY_DN9154_c0_g2_i1.path1
TRINITY_DN92130_c0_g1_i1.path1	Pepsico2_Contig15286.path1	novel.6460	TRINITY_DN39172_c0_g1_i4.path1
TRINITY_DN5857_c0_g1_i1.path1	Pepsico2_Contig19554.path1	TRINITY_DN80123_c0_g1_i1.path1	TRINITY_DN31074_c0_g1_i2.path2
TRINITY_DN51532_c0_g1_i1.path1	novel.8765	novel.6343	TRINITY_DN16825_c0_g1_i7.path1
TRINITY_DN112617_c0_g1_i1.path1	TRINITY_DN56186_c0_g1_i1.path1	TRINITY_DN38896_c0_g1_i1.path1	TRINITY_DN15613_c0_g1_i3.path2
TRINITY_DN14265_c0_g1_i2.path1	novel.1962	novel.10107	TRINITY_DN43075_c0_g1_i2.path1
TRINITY_DN13584_c0_g2_i1.path1	TRINITY_DN253_c0_g2_i12.path1	TRINITY_DN49612_c0_g1_i1.path1	novel.6376
TRINITY_DN39641_c0_g3_i1.path2	Pepsico2_Contig12290.path1	Pepsico2_Contig14912.path1	novel.3680
novel.206	TRINITY_DN24239_c0_g1_i2.path1	novel.4924	TRINITY_DN5180_c0_g2_i3.path1
novel.9063	Pepsico2_Contig16939.path1	TRINITY_DN3394_c1_g1_i3.path1	novel.1131
Pepsico2_Contig7094.path1	Pepsico2_Contig19779.path1	Pepsico2_Contig17718.path1	Pepsico1_Contig3357.path1
Pepsico2_Contig18443.path1	Pepsico1_Contig473.path1	TRINITY_DN6139_c0_g2_i2.path1	TRINITY_DN14497_c0_g1_i2.path1
Pepsico1_Contig1307.path1	Pepsico1_Contig4681.path1	TRINITY_DN1928_c0_g1_i7.path1	novel.8125
Pepsico2_Contig15269.path1	novel.6730	TRINITY_DN61085_c0_g1_i1.path1	novel.5743
Pepsico2_Contig16301.path1	Pepsico1_Contig51.path1	TRINITY_DN48202_c0_g1_i2.path1	TRINITY_DN22741_c0_g4_i1.path1
Pepsico2_Contig14675.path1	Pepsico2_Contig19981.path1	TRINITY_DN18723_c0_g1_i1.path2	TRINITY_DN33661_c0_g1_i1.path1
novel.2550	novel.3345	TRINITY_DN38179_c0_g1_i1.path1	Pepsico1_Contig3412.path1
TRINITY_DN113966_c0_g1_i1.path1	TRINITY_DN20878_c0_g2_i1.path1	novel.1344	TRINITY_DN8645_c0_g1_i16.path2
novel.6954	Pepsico2_Contig8305.path1	Pepsico2_Contig6288.path1	TRINITY_DN38626_c0_g3_i1.path1
TRINITY_DN5876_c0_g2_i1.path2	novel.9592	TRINITY_DN22741_c0_g2_i2.path1	Pepsico1_Contig2049.path1
TRINITY_DN47229_c0_g1_i1.path1	novel.9857	TRINITY_DN79503_c0_g1_i1.path1	novel.7604
TRINITY_DN9514_c0_g1_i2.path1	TRINITY_DN96580_c0_g1_i1.path1	TRINITY_DN9421_c0_g1_i1.path1	TRINITY_DN26045_c0_g1_i4.path1
Pepsico1_Contig2161.path1	novel.9358	Pepsico1_Contig224.path1	novel.2707
Pepsico2_Contig17000.path1	TRINITY_DN6632_c0_g2_i1.path1	TRINITY_DN1928_c0_g1_i7.path2	Pepsico1_Contig185.path1
novel.3787	Pepsico2_Contig18121.path1	Pepsico2_Contig1309.path1	TRINITY_DN4289_c0_g1_i2.path1
Pepsico1_Contig1806.path1	novel.5378	novel.7460	TRINITY_DN14827_c0_g1_i1.path1
TRINITY_DN97146_c0_g1_i1.path1	TRINITY_DN22732_c0_g2_i3.path1	TRINITY_DN5721_c0_g1_i1.path1	novel.1912
TRINITY_DN33314_c0_g1_i1.path1	novel.560	novel.2850	novel.741
TRINITY_DN36164_c0_g1_i1.path1	novel.10061	Pepsico2_Contig12291.path1	TRINITY_DN16614_c0_g2_i1.path1
novel.4068	Pepsico1_Contig1271.path1	TRINITY_DN9377_c0_g1_i1.path1	novel.4360
novel.4399	TRINITY_DN33468_c0_g1_i2.path1	novel.1756	novel.2361
TRINITY_DN29007_c0_g1_i2.path1	TRINITY_DN28038_c0_g1_i1.path1	TRINITY_DN13715_c0_g1_i1.path1	novel.6954
TRINITY_DN10826_c0_g1_i2.path1	novel.3987	novel.3939	Pepsico2_Contig16749.path1
TRINITY_DN6562_c0_g1_i5.path3	novel.7472	Pepsico2_Contig17058.path1	novel.73
Pepsico2_Contig2460.path1	TRINITY_DN33878_c0_g1_i2.path1	novel.8493	TRINITY_DN9952_c0_g3_i1.path1
TRINITY_DN9701_c0_g1_i1.path1	TRINITY_DN26262_c0_g1_i1.path1	TRINITY_DN26545_c0_g1_i1.path1	TRINITY_DN27095_c0_g1_i1.path1
TRINITY_DN12400_c0_g1_i9.path1	TRINITY_DN30789_c0_g2_i1.path2	TRINITY_DN32288_c0_g3_i1.path1	TRINITY_DN87711_c0_g1_i1.path2
TRINITY_DN20960_c0_g1_i1.path2	Pepsico2_Contig344.path2	TRINITY_DN10738_c0_g2_i1.path1	novel.7166
novel.678	Pepsico1_Contig1515.path1	TRINITY_DN16362_c0_g1_i1.path1	Pepsico2_Contig1163.path1
TRINITY_DN32451_c0_g1_i2.path1	Pepsico2_Contig3785.path2	TRINITY_DN60733_c0_g1_i1.path1	Pepsico2_Contig200.path1
TRINITY_DN17502_c0_g1_i2.path1	Pepsico1_Contig4042.path1	Pepsico2_Contig6107.path1	TRINITY_DN108824_c0_g1_i1.path1
TRINITY_DN4360_c2_g1_i3.path1	TRINITY_DN8516_c0_g1_i1.path1	novel.609	TRINITY_DN24281_c0_g1_i3.path2
novel.646	TRINITY_DN25887_c0_g1_i1.path1	Pepsico2_Contig16982.path2	TRINITY_DN15251_c0_g1_i1.path1
novel.7198	novel.6844	novel.7885	novel.5189
novel.9240	TRINITY_DN36977_c1_g1_i1.path1	Pepsico1_Contig1878.path1	novel.7610
TRINITY_DN11020_c0_g1_i1.path2	novel.7198	novel.5643	TRINITY_DN102479_c0_g1_i1.path1
novel.656	novel.170	TRINITY_DN10471_c0_g2_i1.path2	TRINITY_DN36833_c1_g1_i1.path1
TRINITY_DN14386_c0_g1_i3.path1	Pepsico2_Contig12476.path1	novel.1131	Pepsico1_Contig1287.path1
novel.4131	Pepsico1_Contig4198.path2	TRINITY_DN17463_c0_g1_i3.path3	TRINITY_DN43075_c0_g1_i2.path3
TRINITY_DN102546_c0_g1_i1.path1	novel.3824	TRINITY_DN41217_c0_g1_i1.path1	novel.6829
Pepsico1_Contig1886.path1	novel.2029	Pepsico2_Contig2004.path2	Pepsico2_Contig10688.path1
novel.3468	Pepsico1_Contig2484.path1	TRINITY_DN4289_c0_g2_i1.path2	novel.7309
TRINITY_DN10656_c0_g3_i1.path3	novel.4950	novel.51	TRINITY_DN9230_c0_g1_i2.path2
TRINITY_DN57296_c0_g1_i1.path1	TRINITY_DN15407_c0_g1_i3.path2	Pepsico2_Contig5887.path1	Pepsico2_Contig20487.path1
novel.4988	Pepsico2_Contig6486.path1	novel.5776	TRINITY_DN5876_c0_g2_i1.path2
TRINITY_DN35966_c0_g2_i1.path1	Pepsico2_Contig11017.path1	novel.239	TRINITY_DN27615_c0_g1_i1.path1
novel.7818	novel.9768	TRINITY_DN5904_c0_g1_i3.path1	TRINITY_DN40411_c0_g1_i1.path1
TRINITY_DN44585_c0_g1_i1.path1	TRINITY_DN30879_c0_g1_i4.path1	Pepsico1_Contig585.path1	novel.2457
TRINITY_DN84925_c0_g1_i1.path1	Pepsico2_Contig17795.path1	TRINITY_DN86613_c0_g1_i1.path1	Pepsico1_Contig4093.path1
novel.9640	Pepsico2_Contig14468.path1	Pepsico2_Contig791.path1	novel.650
TRINITY_DN31463_c0_g1_i1.path1	novel.278	TRINITY_DN6678_c0_g2_i1.path1	Pepsico1_Contig2258.path2
TRINITY_DN13991_c0_g2_i3.path1	TRINITY_DN53627_c0_g2_i2.path1	TRINITY_DN15952_c1_g1_i2.path2	TRINITY_DN19018_c0_g1_i1.path1
Pepsico2_Contig155.path1	TRINITY_DN89378_c0_g1_i1.path1	novel.9895	TRINITY_DN8939_c0_g1_i1.path1
TRINITY_DN21706_c0_g1_i3.path1	TRINITY_DN10166_c0_g1_i1.path1	novel.2719	novel.7876
TRINITY_DN30939_c0_g1_i2.path1	TRINITY_DN6150_c0_g1_i3.path1	TRINITY_DN14296_c0_g2_i1.path1	TRINITY_DN22177_c0_g1_i5.path1
novel.611	TRINITY_DN20454_c1_g1_i1.path1	TRINITY_DN14296_c0_g1_i1.path1	novel.6028
TRINITY_DN47113_c0_g2_i1.path1	TRINITY_DN13777_c0_g1_i4.path1	novel.3578	Pepsico2_Contig10033.path1
Pepsico2_Contig8600.path1	Pepsico1_Contig1511.path1	novel.280	TRINITY_DN27567_c0_g1_i1.path1
novel.5753	novel.6343	novel.1572	Pepsico2_Contig19106.path1
novel.4782	TRINITY_DN3212_c0_g1_i1.path1	Pepsico2_Contig14292.path1	TRINITY_DN27832_c0_g1_i1.path1
novel.9492	novel.4846	Pepsico2_Contig5121.path1	TRINITY_DN14955_c0_g1_i1.path1
novel.172	Pepsico1_Contig4093.path1	TRINITY_DN99177_c0_g1_i1.path1	TRINITY_DN21918_c0_g1_i3.path1
TRINITY_DN58518_c0_g2_i1.path1	TRINITY_DN6841_c0_g1_i2.path1	Pepsico2_Contig5650.path1	novel.8529
Pepsico1_Contig10997.path1	TRINITY_DN17122_c0_g1_i2.path1	TRINITY_DN2210_c0_g2_i3.path1	TRINITY_DN17397_c0_g1_i2.path1
novel.8116	TRINITY_DN2816_c0_g1_i1.path1	TRINITY_DN49626_c0_g1_i1.path1	Pepsico2_Contig19690.path1
novel.2055	novel.5379	TRINITY_DN11558_c0_g1_i1.path1	TRINITY_DN52375_c0_g1_i2.path1
TRINITY_DN7472_c0_g3_i1.path1	TRINITY_DN1623_c1_g1_i8.path2	TRINITY_DN39335_c0_g1_i1.path2	novel.7569
novel.8623	novel.2155	TRINITY_DN21918_c0_g1_i3.path1	TRINITY_DN110160_c0_g1_i1.path1
TRINITY_DN57799_c0_g1_i1.path1	Pepsico1_Contig1649.path1	TRINITY_DN26026_c0_g1_i4.path1	Pepsico1_Contig337.path1
TRINITY_DN18161_c0_g1_i10.path1	TRINITY_DN52025_c0_g2_i1.path2	Pepsico2_Contig2197.path1	TRINITY_DN2337_c0_g2_i1.path1
TRINITY_DN50833_c0_g1_i1.path1	TRINITY_DN28303_c0_g1_i1.path2	TRINITY_DN46714_c0_g1_i1.path1	TRINITY_DN23079_c0_g1_i1.path2
novel.9822	TRINITY_DN33313_c0_g2_i2.path1	TRINITY_DN5876_c0_g2_i1.path2	TRINITY_DN22425_c0_g1_i1.path1
novel.10237	TRINITY_DN46537_c0_g1_i2.path1	novel.4372	TRINITY_DN24768_c0_g2_i1.path2
novel.2909	TRINITY_DN14174_c0_g3_i1.path1	TRINITY_DN6907_c0_g1_i2.path1	Pepsico2_Contig10893.path2
novel.7347	TRINITY_DN14061_c0_g2_i1.path2	novel.7375	TRINITY_DN14620_c0_g1_i2.path1
Pepsico2_Contig17412.path1	novel.9280	novel.4936	novel.1946
TRINITY_DN87764_c0_g1_i1.path1	Pepsico1_Contig7054.path1	TRINITY_DN10752_c0_g1_i1.path1	TRINITY_DN31074_c1_g1_i1.path1
Pepsico1_Contig125.path2	novel.10153	TRINITY_DN102574_c0_g1_i1.path1	novel.4474
Pepsico1_Contig7370.path1	Pepsico2_Contig7511.path1	novel.7991	TRINITY_DN95125_c0_g1_i1.path1
TRINITY_DN20878_c0_g2_i1.path2	Pepsico1_Contig13941.path1	novel.4929	Pepsico1_Contig805.path1
TRINITY_DN1120_c0_g2_i4.path1	novel.5655	TRINITY_DN7656_c0_g1_i1.path3	TRINITY_DN22064_c0_g2_i1.path1
Pepsico2_Contig3621.path2	Pepsico1_Contig7564.path1	TRINITY_DN55806_c0_g1_i1.path2	TRINITY_DN8457_c0_g1_i1.path2
Pepsico2_Contig16925.path1	Pepsico1_Contig521.path1	TRINITY_DN23984_c0_g1_i1.path1	TRINITY_DN7209_c0_g1_i10.path1
novel.2746	TRINITY_DN19237_c0_g1_i2.path2	TRINITY_DN12952_c0_g5_i1.path2	TRINITY_DN12381_c0_g2_i1.path1
TRINITY_DN14757_c0_g3_i1.path1	Pepsico2_Contig12476.path3	Pepsico2_Contig7517.path2	TRINITY_DN19392_c0_g2_i1.path1
Pepsico2_Contig19981.path1	TRINITY_DN9886_c0_g1_i1.path1	TRINITY_DN22177_c0_g1_i5.path1	TRINITY_DN33756_c0_g1_i1.path1
TRINITY_DN21346_c0_g1_i2.path1	TRINITY_DN2743_c0_g1_i31.path1	TRINITY_DN21050_c0_g1_i1.path1	novel.4958
novel.675	TRINITY_DN429_c0_g1_i1.path1	TRINITY_DN7122_c0_g1_i3.path1	TRINITY_DN14014_c0_g3_i1.path1
novel.3563	TRINITY_DN55806_c0_g1_i1.path1	TRINITY_DN89953_c0_g1_i1.path1	TRINITY_DN7357_c0_g1_i1.path1
TRINITY_DN36154_c1_g1_i1.path2	TRINITY_DN19018_c0_g1_i1.path2	novel.4484	TRINITY_DN6102_c0_g1_i1.path1
TRINITY_DN47812_c0_g1_i2.path1	TRINITY_DN11108_c0_g1_i6.path1	novel.1959	novel.5310
novel.3742	TRINITY_DN15577_c0_g1_i4.path1	novel.9616	TRINITY_DN685_c1_g2_i1.path2
novel.4572	Pepsico2_Contig10795.path1	novel.4909	TRINITY_DN23705_c0_g2_i2.path2
Pepsico2_Contig9615.path1	novel.4068	novel.5183	Pepsico1_Contig740.path1
Pepsico2_Contig7681.path2	TRINITY_DN2365_c0_g1_i15.path1	novel.3116	TRINITY_DN10190_c0_g1_i5.path1
TRINITY_DN89972_c0_g1_i1.path1	Pepsico2_Contig17067.path1	TRINITY_DN17093_c0_g1_i1.path2	TRINITY_DN2365_c0_g1_i15.path2
novel.2762	novel.3114	Pepsico1_Contig26.path1	Pepsico2_Contig1071.path1
Pepsico2_Contig3785.path1	TRINITY_DN1459_c0_g2_i3.path1	TRINITY_DN21556_c0_g1_i1.path2	TRINITY_DN12951_c0_g1_i1.path1
TRINITY_DN24316_c0_g1_i3.path1	TRINITY_DN10738_c0_g2_i1.path2	TRINITY_DN5235_c0_g2_i1.path1	TRINITY_DN13270_c0_g1_i2.path1
Pepsico2_Contig17370.path1	TRINITY_DN49612_c0_g1_i1.path1	novel.616	TRINITY_DN13884_c0_g1_i2.path1
TRINITY_DN7122_c0_g1_i3.path1	TRINITY_DN14943_c0_g1_i1.path2	Pepsico2_Contig6839.path1	Pepsico1_Contig1719.path1
TRINITY_DN838_c0_g1_i6.path1	TRINITY_DN23649_c0_g1_i2.path2	TRINITY_DN40238_c1_g1_i1.path1	TRINITY_DN32587_c0_g1_i1.path1
TRINITY_DN606_c0_g1_i1.path1	Pepsico2_Contig15364.path1	TRINITY_DN55287_c0_g1_i1.path3	TRINITY_DN30939_c0_g1_i2.path1
Pepsico2_Contig11033.path1	novel.9258	novel.8732	TRINITY_DN11985_c0_g1_i1.path2
TRINITY_DN10397_c0_g1_i1.path1	Pepsico2_Contig5071.path1	TRINITY_DN18117_c0_g1_i3.path3	Pepsico2_Contig17803.path1
TRINITY_DN30601_c0_g1_i1.path1	Pepsico1_Contig2079.path1	TRINITY_DN2173_c0_g1_i1.path1	TRINITY_DN11161_c0_g1_i5.path2
novel.9241	TRINITY_DN100983_c0_g1_i1.path1	novel.5323	TRINITY_DN90864_c0_g1_i1.path1
TRINITY_DN55241_c0_g1_i3.path1	TRINITY_DN20966_c0_g5_i1.path1	TRINITY_DN18326_c0_g1_i2.path1	novel.7029
Pepsico2_Contig8018.path1	novel.3301	Pepsico2_Contig12841.path2	TRINITY_DN37597_c0_g2_i1.path1
novel.2082	TRINITY_DN22145_c0_g1_i2.path1	TRINITY_DN22831_c0_g1_i2.path1	TRINITY_DN18372_c0_g1_i1.path1
TRINITY_DN52688_c0_g1_i1.path1	TRINITY_DN17070_c0_g2_i3.path1	novel.2116	TRINITY_DN32451_c0_g1_i2.path3
TRINITY_DN58060_c0_g1_i1.path2	Pepsico2_Contig17839.path1	Pepsico2_Contig11330.path1	novel.4904
TRINITY_DN31076_c0_g1_i4.path1	novel.3995	Pepsico2_Contig16082.path1	novel.9358
Pepsico2_Contig20105.path1	TRINITY_DN51929_c0_g1_i1.path1	Pepsico2_Contig19649.path1	TRINITY_DN22326_c1_g1_i2.path1
TRINITY_DN4437_c0_g1_i2.path2	Pepsico2_Contig1309.path1	TRINITY_DN9939_c0_g1_i2.path1	novel.7228
Pepsico2_Contig11307.path1	TRINITY_DN49805_c0_g1_i1.path2	TRINITY_DN33468_c0_g1_i2.path1	TRINITY_DN59954_c0_g1_i3.path1
TRINITY_DN22425_c0_g1_i1.path3	novel.5000	TRINITY_DN5602_c0_g1_i1.path1	Pepsico1_Contig25384.path1
TRINITY_DN1968_c0_g1_i4.path1	novel.4974	TRINITY_DN13609_c0_g1_i3.path1	TRINITY_DN78849_c0_g1_i1.path1
Pepsico2_Contig9089.path1	Pepsico1_Contig720.path1	novel.4608	TRINITY_DN43131_c0_g1_i2.path1
novel.2053	TRINITY_DN109183_c0_g1_i1.path1	TRINITY_DN16513_c0_g2_i1.path1	Pepsico2_Contig5650.path1
TRINITY_DN8832_c1_g1_i2.path1	TRINITY_DN10048_c0_g1_i2.path1	TRINITY_DN31076_c0_g1_i4.path2	TRINITY_DN8392_c0_g1_i2.path1
Pepsico2_Contig6260.path2	novel.5248	novel.8861	TRINITY_DN10471_c0_g2_i1.path2
novel.4317	TRINITY_DN492_c0_g2_i2.path1	Pepsico2_Contig17052.path2	Pepsico2_Contig15237.path1
Pepsico1_Contig921.path2	TRINITY_DN7706_c0_g1_i9.path1	Pepsico1_Contig7138.path1	Pepsico2_Contig4698.path1
TRINITY_DN11985_c0_g1_i1.path1	Pepsico2_Contig781.path1	TRINITY_DN4506_c0_g1_i2.path1	novel.1264
TRINITY_DN2450_c1_g2_i1.path1	TRINITY_DN97541_c0_g1_i1.path1	TRINITY_DN5076_c0_g1_i5.path1	Pepsico1_Contig1725.path1
TRINITY_DN91921_c0_g1_i1.path1	TRINITY_DN553_c0_g3_i1.path1	novel.4344	TRINITY_DN3197_c0_g2_i1.path1
Pepsico1_Contig2142.path1	TRINITY_DN24481_c0_g1_i3.path1	TRINITY_DN52025_c0_g1_i2.path1	TRINITY_DN13645_c0_g2_i1.path1
TRINITY_DN13907_c0_g1_i1.path1	TRINITY_DN90920_c0_g1_i1.path1	novel.4062	novel.2119
Pepsico2_Contig8532.path2	Pepsico2_Contig6260.path2	TRINITY_DN4172_c0_g1_i16.path1	novel.2556
TRINITY_DN21253_c0_g5_i1.path1	TRINITY_DN48093_c0_g1_i1.path2	Pepsico1_Contig35521.path1	TRINITY_DN7127_c0_g2_i6.path2
TRINITY_DN45534_c0_g1_i1.path1	TRINITY_DN5721_c0_g1_i1.path1	TRINITY_DN25061_c0_g1_i2.path1	Pepsico1_Contig720.path1
TRINITY_DN4885_c0_g2_i1.path1	TRINITY_DN78422_c0_g1_i2.path1	novel.9940	TRINITY_DN12040_c0_g1_i15.path2
TRINITY_DN7357_c0_g1_i1.path1	novel.5549	TRINITY_DN23468_c0_g1_i2.path2	Pepsico2_Contig3011.path2
TRINITY_DN31241_c0_g1_i1.path1	TRINITY_DN8375_c1_g1_i2.path1	Pepsico2_Contig6539.path1	TRINITY_DN33691_c0_g1_i1.path1
TRINITY_DN26545_c0_g1_i1.path2	novel.9967	TRINITY_DN5355_c1_g1_i3.path1	TRINITY_DN11138_c1_g1_i2.path2
TRINITY_DN50836_c1_g1_i1.path1	novel.5395	TRINITY_DN18372_c0_g1_i1.path2	Pepsico2_Contig21049.path1
TRINITY_DN14296_c0_g2_i1.path1	Pepsico2_Contig19452.path1	novel.10027	TRINITY_DN21323_c0_g1_i1.path1
novel.9595	Pepsico2_Contig13855.path1	novel.8160	Pepsico2_Contig399.path1
TRINITY_DN17710_c0_g1_i1.path1	novel.1402	TRINITY_DN17710_c0_g2_i2.path1	novel.6785
TRINITY_DN21011_c0_g1_i7.path1	novel.6613	TRINITY_DN43075_c0_g1_i2.path3	Pepsico2_Contig12487.path1
Pepsico1_Contig1404.path1	novel.7460	TRINITY_DN6009_c0_g1_i6.path1	TRINITY_DN10277_c0_g1_i1.path1
TRINITY_DN53881_c0_g1_i1.path1	Pepsico1_Contig4914.path1	novel.5625	TRINITY_DN26408_c0_g1_i1.path1
TRINITY_DN4502_c0_g2_i1.path1	TRINITY_DN36154_c0_g1_i3.path1	novel.1447	TRINITY_DN7981_c0_g2_i2.path1
TRINITY_DN24519_c0_g1_i2.path1	novel.2116	TRINITY_DN18372_c0_g1_i1.path1	Pepsico2_Contig12177.path1
novel.7998	TRINITY_DN21357_c0_g1_i1.path1	TRINITY_DN16286_c0_g1_i4.path1	novel.5694
novel.10127	novel.7557	TRINITY_DN4879_c0_g2_i1.path1	Pepsico2_Contig13889.path2
Pepsico1_Contig5244.path1	TRINITY_DN13587_c0_g1_i6.path1	TRINITY_DN53636_c0_g1_i1.path1	novel.10221
Pepsico1_Contig21216.path2	novel.10237	TRINITY_DN33361_c0_g1_i5.path2	TRINITY_DN30875_c0_g1_i1.path1
TRINITY_DN27960_c0_g1_i2.path1	novel.4484	Pepsico2_Contig15617.path1	TRINITY_DN2210_c0_g2_i3.path1
TRINITY_DN46317_c0_g1_i1.path1	novel.5350	TRINITY_DN60938_c0_g1_i1.path1	Pepsico1_Contig6478.path1
Pepsico2_Contig17058.path1	novel.857	TRINITY_DN20775_c0_g1_i3.path2	novel.10101
TRINITY_DN39098_c0_g1_i1.path1	TRINITY_DN78849_c0_g1_i1.path1	TRINITY_DN9998_c0_g2_i1.path1	Pepsico1_Contig4130.path1
TRINITY_DN9047_c1_g1_i3.path1	TRINITY_DN13991_c1_g1_i1.path1	TRINITY_DN13217_c0_g1_i1.path1	TRINITY_DN18491_c0_g1_i3.path1
TRINITY_DN13217_c1_g1_i1.path1	TRINITY_DN11328_c0_g1_i1.path1	novel.7540	TRINITY_DN2098_c1_g1_i5.path1
TRINITY_DN56086_c0_g2_i1.path1	Pepsico2_Contig14991.path1	TRINITY_DN20133_c0_g1_i3.path2	novel.7051
novel.2289	Pepsico2_Contig11409.path1	TRINITY_DN38078_c0_g1_i1.path1	TRINITY_DN23984_c0_g1_i1.path1
TRINITY_DN14241_c0_g1_i1.path1	TRINITY_DN30899_c0_g2_i1.path1	novel.4663	Pepsico1_Contig4053.path1
TRINITY_DN36674_c0_g1_i1.path1	novel.829	TRINITY_DN1201_c0_g1_i3.path1	novel.9840
novel.4376	TRINITY_DN2467_c0_g1_i3.path1	Pepsico1_Contig377.path1	Pepsico2_Contig17052.path2
TRINITY_DN356_c0_g1_i3.path1	TRINITY_DN15272_c0_g2_i1.path1	TRINITY_DN2145_c0_g1_i1.path1	TRINITY_DN11717_c0_g2_i2.path1
novel.1393	TRINITY_DN5968_c0_g1_i3.path1	TRINITY_DN9693_c0_g1_i7.path1	novel.232
TRINITY_DN21711_c0_g1_i1.path1	TRINITY_DN5876_c1_g1_i1.path1	TRINITY_DN1583_c0_g1_i1.path1	novel.3853
Pepsico2_Contig17883.path1	Pepsico1_Contig7006.path1	TRINITY_DN5876_c0_g1_i1.path1	novel.8756
novel.3049	TRINITY_DN1105_c0_g1_i2.path1	TRINITY_DN35_c0_g2_i1.path1	TRINITY_DN45534_c0_g1_i1.path3
novel.7084	novel.6287	novel.4679	novel.2806
TRINITY_DN37924_c0_g3_i1.path1	novel.9187	TRINITY_DN3986_c0_g1_i1.path1	novel.9592
Pepsico2_Contig3085.path1	TRINITY_DN54245_c0_g1_i1.path1	novel.9974	novel.4164
TRINITY_DN56086_c0_g1_i1.path1	novel.4585	TRINITY_DN34253_c0_g1_i1.path1	novel.4248
TRINITY_DN34948_c0_g1_i1.path2	TRINITY_DN5876_c0_g1_i1.path1	TRINITY_DN32319_c0_g1_i1.path1	novel.9895
TRINITY_DN79160_c0_g1_i1.path1	Pepsico2_Contig14530.path1	Pepsico2_Contig20597.path2	TRINITY_DN22584_c0_g3_i1.path1
novel.4973	TRINITY_DN19722_c0_g1_i1.path1	TRINITY_DN80803_c0_g1_i1.path1	TRINITY_DN31113_c0_g2_i2.path1
TRINITY_DN6082_c0_g2_i1.path1	Pepsico2_Contig2625.path1	Pepsico2_Contig20465.path1	TRINITY_DN6189_c0_g2_i2.path1
novel.9967	TRINITY_DN5010_c0_g1_i1.path1	novel.8042	TRINITY_DN5135_c0_g2_i1.path1
novel.3013	TRINITY_DN19468_c0_g2_i2.path1	TRINITY_DN15215_c0_g1_i1.path1	TRINITY_DN43500_c0_g1_i1.path1
TRINITY_DN37872_c0_g2_i1.path2	novel.4924	novel.8211	novel.1625
Pepsico2_Contig16777.path1	Pepsico1_Contig1307.path1	novel.9339	novel.1011
novel.7567	Pepsico2_Contig3832.path2	Pepsico2_Contig11122.path1	Pepsico2_Contig14648.path1
TRINITY_DN10802_c0_g1_i1.path2	novel.2119	novel.2765	Pepsico2_Contig638.path2
TRINITY_DN50612_c0_g1_i1.path1	novel.4995	TRINITY_DN8683_c0_g1_i1.path2	TRINITY_DN19341_c0_g1_i1.path1
Pepsico2_Contig16228.path1	Pepsico2_Contig7681.path2	TRINITY_DN62134_c5_g1_i1.path1	TRINITY_DN102160_c0_g1_i1.path1
novel.5861	TRINITY_DN14014_c0_g3_i1.path1	Pepsico2_Contig19467.path1	Pepsico1_Contig7054.path2
Pepsico2_Contig14438.path1	Pepsico1_Contig740.path1	Pepsico2_Contig9786.path1	TRINITY_DN31456_c0_g2_i4.path3
novel.9941	TRINITY_DN16298_c0_g2_i1.path1	TRINITY_DN8283_c0_g1_i1.path1	Pepsico2_Contig12692.path5
TRINITY_DN859_c0_g4_i1.path1	novel.8124	TRINITY_DN11163_c1_g2_i1.path1	TRINITY_DN70144_c0_g1_i1.path1
TRINITY_DN14933_c0_g3_i1.path2	Pepsico1_Contig3259.path1	TRINITY_DN22741_c0_g4_i1.path1	TRINITY_DN429_c0_g1_i1.path1
TRINITY_DN33314_c0_g1_i1.path5	TRINITY_DN8380_c0_g1_i5.path1	Pepsico2_Contig9102.path1	TRINITY_DN79503_c0_g1_i1.path1
TRINITY_DN13998_c0_g2_i1.path1	TRINITY_DN12164_c0_g1_i1.path1	TRINITY_DN9750_c0_g1_i6.path1	TRINITY_DN24079_c0_g1_i1.path1
TRINITY_DN90053_c0_g1_i1.path1	Pepsico1_Contig2556.path1	Pepsico2_Contig3750.path2	TRINITY_DN28946_c0_g1_i2.path2
Pepsico2_Contig8201.path1	novel.8383	novel.651	Pepsico1_Contig3912.path1
TRINITY_DN22318_c0_g2_i5.path1	TRINITY_DN19573_c0_g1_i1.path1	novel.2368	novel.3089
novel.9457	TRINITY_DN7472_c0_g2_i1.path1	TRINITY_DN9701_c0_g1_i1.path1	TRINITY_DN20889_c1_g1_i1.path1
TRINITY_DN32274_c0_g3_i1.path1	TRINITY_DN29865_c0_g1_i1.path2	novel.4643	TRINITY_DN35789_c0_g1_i1.path2
TRINITY_DN30789_c0_g2_i1.path2	Pepsico2_Contig452.path1	TRINITY_DN108478_c0_g1_i1.path4	TRINITY_DN2173_c0_g1_i1.path1
TRINITY_DN8174_c0_g1_i4.path1	Pepsico1_Contig5244.path1	TRINITY_DN7830_c0_g1_i1.path1	Pepsico1_Contig473.path1
TRINITY_DN33475_c0_g1_i2.path1	Pepsico2_Contig2004.path2	novel.5681	Pepsico2_Contig7831.path2
TRINITY_DN91867_c0_g1_i1.path1	Pepsico2_Contig8599.path1	TRINITY_DN13270_c0_g1_i2.path1	novel.7375
TRINITY_DN78470_c0_g1_i1.path1	Pepsico2_Contig1781.path1	novel.4904	novel.9339
novel.2798	TRINITY_DN11150_c0_g1_i1.path1	TRINITY_DN27955_c0_g1_i1.path1	TRINITY_DN61508_c0_g1_i1.path1
TRINITY_DN45534_c0_g1_i1.path2	TRINITY_DN17099_c0_g1_i1.path1	TRINITY_DN10437_c0_g1_i2.path1	Pepsico1_Contig1137.path1
Pepsico2_Contig10869.path1	TRINITY_DN22824_c0_g2_i1.path1	novel.1098	Pepsico2_Contig6015.path1
TRINITY_DN91460_c0_g1_i1.path1	TRINITY_DN40112_c0_g1_i1.path1	Pepsico2_Contig4717.path1	TRINITY_DN33314_c0_g1_i1.path1
TRINITY_DN9952_c0_g2_i1.path1	TRINITY_DN4132_c0_g2_i1.path1	novel.1975	novel.3002
novel.8136	TRINITY_DN22196_c0_g3_i1.path1	novel.2818	Pepsico2_Contig8018.path1
TRINITY_DN42674_c0_g1_i1.path1	TRINITY_DN42509_c0_g2_i1.path1	novel.1576	TRINITY_DN47629_c0_g1_i1.path1
TRINITY_DN60611_c0_g1_i1.path1	TRINITY_DN5591_c0_g1_i3.path1	Pepsico2_Contig7517.path1	TRINITY_DN21931_c0_g1_i2.path1
Pepsico1_Contig32533.path1	TRINITY_DN21547_c0_g2_i1.path1	TRINITY_DN33314_c0_g1_i1.path1	novel.3987
Pepsico1_Contig1041.path1	TRINITY_DN9939_c0_g1_i2.path1	novel.3033	TRINITY_DN12676_c0_g1_i7.path1
TRINITY_DN8675_c0_g2_i1.path1	TRINITY_DN3659_c2_g1_i1.path1	TRINITY_DN27112_c0_g3_i3.path1	TRINITY_DN15695_c0_g1_i3.path1
novel.7573	novel.1560	TRINITY_DN14933_c0_g3_i1.path2	TRINITY_DN40354_c0_g1_i2.path1
novel.751	TRINITY_DN35060_c1_g1_i1.path1	novel.682	TRINITY_DN49626_c0_g1_i1.path1
Pepsico2_Contig7514.path1	novel.7110	TRINITY_DN69868_c0_g1_i1.path1	Pepsico1_Contig1934.path2
TRINITY_DN42787_c0_g1_i1.path1	novel.4061	TRINITY_DN88632_c0_g1_i1.path1	TRINITY_DN29785_c0_g1_i1.path1
TRINITY_DN5876_c0_g2_i1.path1	TRINITY_DN99982_c0_g1_i1.path2	novel.5132	novel.8112
TRINITY_DN9851_c0_g1_i1.path2	TRINITY_DN2010_c0_g1_i1.path1	Pepsico2_Contig4804.path1	TRINITY_DN33314_c0_g1_i1.path4
TRINITY_DN13954_c0_g1_i1.path1	Pepsico2_Contig4152.path1	novel.9427	TRINITY_DN90454_c0_g1_i1.path1
TRINITY_DN12254_c0_g1_i1.path1	TRINITY_DN48202_c0_g1_i2.path1	Pepsico2_Contig13844.path1	Pepsico1_Contig107.path1
Pepsico1_Contig35491.path1	novel.7636	TRINITY_DN17168_c1_g1_i2.path1	TRINITY_DN36978_c0_g1_i1.path1
TRINITY_DN65510_c0_g1_i1.path1	TRINITY_DN5876_c0_g2_i1.path1	Pepsico1_Contig4130.path1	TRINITY_DN11951_c0_g1_i1.path1
Pepsico1_Contig38484.path3	TRINITY_DN91808_c0_g1_i1.path1	TRINITY_DN1201_c2_g1_i2.path1	TRINITY_DN89139_c0_g1_i1.path1
TRINITY_DN102914_c0_g1_i1.path1	Pepsico1_Contig1284.path1	Pepsico2_Contig10630.path1	TRINITY_DN4714_c0_g1_i9.path1
Pepsico2_Contig399.path1	TRINITY_DN32389_c0_g1_i1.path1	TRINITY_DN5135_c0_g1_i1.path1	novel.1975
TRINITY_DN47298_c0_g1_i1.path1	novel.3716	TRINITY_DN6454_c0_g2_i1.path1	TRINITY_DN16298_c0_g2_i1.path1
TRINITY_DN58174_c1_g1_i1.path1	TRINITY_DN19900_c0_g2_i1.path1	Pepsico2_Contig3315.path1	TRINITY_DN11270_c1_g1_i1.path1
TRINITY_DN81379_c0_g1_i1.path1	TRINITY_DN1581_c0_g1_i3.path2	novel.1377	novel.1781
TRINITY_DN101134_c0_g1_i1.path1	TRINITY_DN88385_c0_g1_i1.path1	novel.7166	TRINITY_DN42509_c0_g1_i1.path1
TRINITY_DN19923_c0_g1_i3.path1	novel.1011	TRINITY_DN26760_c0_g1_i1.path1	TRINITY_DN4289_c0_g2_i1.path2
novel.10140	novel.4697	TRINITY_DN99452_c0_g1_i1.path1	TRINITY_DN18372_c0_g1_i1.path2
TRINITY_DN5876_c0_g3_i1.path1	novel.672	novel.7357	TRINITY_DN26026_c0_g1_i4.path1
Pepsico1_Contig125.path1	TRINITY_DN18259_c0_g1_i1.path1	novel.2868	TRINITY_DN6082_c0_g2_i1.path1
TRINITY_DN3986_c0_g1_i1.path1	TRINITY_DN31787_c0_g1_i2.path2	TRINITY_DN40344_c0_g1_i1.path1	TRINITY_DN25530_c0_g1_i1.path1
TRINITY_DN3180_c0_g2_i1.path1	TRINITY_DN38078_c0_g1_i1.path1	Pepsico2_Contig1445.path1	TRINITY_DN8094_c0_g1_i2.path1
TRINITY_DN26083_c0_g1_i3.path1	novel.6794	TRINITY_DN29865_c0_g1_i1.path2	TRINITY_DN24030_c0_g1_i1.path1
TRINITY_DN22361_c0_g1_i4.path1	Pepsico2_Contig3304.path1	novel.2297	novel.5776
TRINITY_DN65392_c0_g1_i1.path1	novel.3126	novel.7636	novel.10216
Pepsico2_Contig6528.path1	TRINITY_DN17722_c0_g1_i1.path1	TRINITY_DN15524_c0_g1_i1.path1	TRINITY_DN15905_c1_g1_i1.path2
Pepsico2_Contig9966.path1	TRINITY_DN15006_c0_g1_i3.path1	Pepsico1_Contig7006.path1	Pepsico2_Contig16783.path1
TRINITY_DN8622_c0_g3_i1.path1	TRINITY_DN88632_c0_g1_i1.path1	TRINITY_DN35789_c0_g1_i1.path2	novel.583
TRINITY_DN21556_c0_g1_i1.path2	Pepsico2_Contig1842.path1	TRINITY_DN8414_c0_g1_i2.path1	novel.2134
Pepsico1_Contig855.path1	Pepsico1_Contig2450.path2	Pepsico2_Contig10474.path1	novel.4061
novel.8065	TRINITY_DN80123_c0_g1_i1.path1	TRINITY_DN10853_c0_g1_i1.path1	TRINITY_DN71191_c0_g1_i1.path1
TRINITY_DN8380_c0_g1_i5.path1	Pepsico2_Contig7109.path1	Pepsico2_Contig7718.path1	TRINITY_DN30113_c0_g1_i1.path1
novel.5230	novel.6254	novel.3089	TRINITY_DN10470_c0_g1_i2.path1
Pepsico1_Contig2047.path1	TRINITY_DN22030_c0_g1_i4.path2	TRINITY_DN13645_c0_g2_i1.path1	TRINITY_DN37342_c0_g2_i1.path1
novel.6737	TRINITY_DN21259_c0_g1_i1.path1	Pepsico1_Contig1719.path1	TRINITY_DN32774_c0_g1_i1.path2
TRINITY_DN14779_c0_g2_i1.path1	TRINITY_DN5232_c0_g1_i7.path1	TRINITY_DN31456_c0_g2_i4.path3	novel.9940
TRINITY_DN24462_c0_g1_i1.path1	TRINITY_DN11593_c1_g2_i1.path1	Pepsico2_Contig17288.path1	TRINITY_DN9897_c0_g2_i1.path2
novel.8024	TRINITY_DN32968_c0_g1_i1.path1	TRINITY_DN21515_c0_g1_i1.path1	novel.408
Pepsico1_Contig886.path1	novel.3578	TRINITY_DN9040_c0_g1_i1.path1	TRINITY_DN9701_c0_g1_i1.path1
novel.5014	TRINITY_DN18698_c0_g1_i1.path2	TRINITY_DN5591_c0_g1_i3.path2	novel.1880
TRINITY_DN19760_c0_g1_i2.path1	novel.6689	TRINITY_DN6144_c0_g2_i2.path1	TRINITY_DN112669_c0_g1_i1.path1
novel.3361	TRINITY_DN47298_c0_g3_i1.path1	TRINITY_DN14827_c0_g1_i1.path1	novel.5681
Pepsico1_Contig6987.path1	TRINITY_DN25120_c0_g1_i1.path1	TRINITY_DN12960_c0_g1_i2.path2	TRINITY_DN49612_c0_g1_i1.path1
novel.5614	TRINITY_DN876_c1_g2_i3.path1	novel.7029	TRINITY_DN17093_c0_g1_i1.path2
TRINITY_DN41201_c0_g2_i1.path2	novel.5191	TRINITY_DN35686_c0_g2_i1.path1	novel.9616
Pepsico2_Contig9387.path2	TRINITY_DN57296_c0_g1_i1.path1	novel.10131	TRINITY_DN5904_c0_g1_i3.path1
TRINITY_DN40344_c0_g1_i1.path1	Pepsico1_Contig32062.path1	TRINITY_DN65510_c0_g1_i1.path1	TRINITY_DN245_c0_g2_i1.path1
Pepsico2_Contig2989.path1	Pepsico2_Contig19412.path1	novel.5863	Pepsico2_Contig17730.path1
TRINITY_DN27316_c0_g1_i2.path1	TRINITY_DN14737_c0_g1_i1.path2	novel.672	TRINITY_DN17466_c0_g1_i1.path1
Pepsico1_Contig1764.path1	Pepsico2_Contig15995.path1	TRINITY_DN26281_c0_g2_i1.path1	Pepsico1_Contig2677.path1
TRINITY_DN5562_c0_g1_i5.path1	novel.8764	TRINITY_DN79263_c0_g1_i1.path1	novel.10172
TRINITY_DN5876_c0_g1_i1.path1	Pepsico1_Contig1620.path2	novel.4577	novel.1308
Pepsico2_Contig18187.path2	TRINITY_DN67992_c0_g1_i1.path1	Pepsico2_Contig15498.path1	novel.9716
novel.10318	TRINITY_DN21011_c0_g1_i7.path1	TRINITY_DN9851_c0_g1_i1.path2	novel.7557
Pepsico1_Contig5108.path1	TRINITY_DN25186_c0_g1_i1.path1	TRINITY_DN102479_c0_g1_i1.path1	TRINITY_DN33313_c0_g2_i2.path1
TRINITY_DN24110_c0_g1_i1.path1	novel.8008	Pepsico2_Contig17023.path1	TRINITY_DN14533_c0_g1_i4.path2
novel.5743	TRINITY_DN40419_c0_g1_i1.path1	TRINITY_DN37597_c0_g2_i1.path1	novel.42
TRINITY_DN111973_c0_g1_i1.path2	novel.5551	TRINITY_DN26976_c0_g1_i3.path1	TRINITY_DN10981_c1_g1_i2.path1
TRINITY_DN4_c0_g1_i6.path2	Pepsico2_Contig19525.path2	novel.3716	Pepsico1_Contig2378.path1
Pepsico2_Contig2050.path1	novel.7810	TRINITY_DN27832_c0_g1_i1.path1	Pepsico1_Contig910.path1
TRINITY_DN79603_c0_g1_i1.path1	novel.8087	TRINITY_DN10530_c0_g1_i3.path1	Pepsico2_Contig13783.path1
Pepsico1_Contig2524.path1	novel.546	Pepsico2_Contig11432.path1	TRINITY_DN28946_c0_g1_i2.path1
TRINITY_DN85672_c0_g1_i1.path1	TRINITY_DN30194_c0_g1_i5.path1	novel.6472	TRINITY_DN7096_c0_g3_i1.path1
TRINITY_DN18372_c0_g1_i1.path2	Pepsico1_Contig18.path2	novel.7604	Pepsico2_Contig748.path1
novel.7595	Pepsico2_Contig7514.path1	TRINITY_DN21506_c0_g1_i1.path1	novel.9278
TRINITY_DN7915_c0_g2_i2.path1	novel.9240	TRINITY_DN9230_c0_g1_i2.path2	Pepsico2_Contig13425.path1
TRINITY_DN15446_c0_g2_i1.path1	Pepsico2_Contig5143.path1	novel.1513	TRINITY_DN7521_c0_g1_i1.path2
novel.9076	novel.4062	Pepsico1_Contig638.path1	novel.6249
Pepsico2_Contig1163.path1	Pepsico1_Contig1037.path1	novel.5551	TRINITY_DN80132_c0_g1_i1.path1
novel.2367	Pepsico1_Contig6031.path2	TRINITY_DN35910_c0_g1_i1.path1	Pepsico2_Contig19415.path2
TRINITY_DN24149_c0_g1_i1.path1	TRINITY_DN9750_c0_g1_i6.path1	TRINITY_DN17321_c0_g1_i4.path1	novel.5050
Pepsico2_Contig17225.path2	TRINITY_DN71899_c0_g1_i2.path1	novel.1958	novel.4995
novel.6816	TRINITY_DN20864_c0_g1_i1.path1	Pepsico1_Contig185.path1	TRINITY_DN106494_c0_g1_i1.path1
TRINITY_DN112522_c0_g1_i1.path1	TRINITY_DN12400_c0_g1_i9.path1	novel.3926	Pepsico2_Contig5930.path2
TRINITY_DN103047_c0_g1_i1.path1	novel.2564	novel.8296	Pepsico1_Contig4300.path1
Pepsico1_Contig2079.path1	Pepsico1_Contig2524.path1	TRINITY_DN9392_c0_g1_i5.path1	Pepsico2_Contig12826.path1
TRINITY_DN20395_c0_g1_i2.path1	TRINITY_DN2292_c0_g2_i1.path3	Pepsico1_Contig6629.path1	TRINITY_DN15240_c0_g1_i3.path1
TRINITY_DN32587_c0_g1_i1.path1	TRINITY_DN15598_c0_g1_i4.path4	TRINITY_DN32349_c0_g1_i2.path1	TRINITY_DN28026_c0_g1_i1.path1
Pepsico1_Contig6573.path1	TRINITY_DN6572_c0_g1_i5.path2	Pepsico2_Contig13865.path1	novel.8008
Pepsico2_Contig4870.path1	TRINITY_DN84024_c0_g1_i1.path1	TRINITY_DN91900_c0_g1_i1.path1	novel.1301
TRINITY_DN17783_c0_g1_i3.path1	novel.768	novel.1005	Pepsico1_Contig125.path1
TRINITY_DN22937_c0_g1_i3.path1	Pepsico2_Contig8201.path1	TRINITY_DN9154_c0_g2_i1.path1	novel.4909
novel.7637	TRINITY_DN22219_c0_g1_i1.path2	novel.5900	TRINITY_DN9514_c0_g1_i2.path1
TRINITY_DN55690_c1_g1_i1.path1	novel.3815	novel.4958	Pepsico2_Contig20597.path2
novel.4223	Pepsico2_Contig16922.path1	TRINITY_DN3634_c0_g1_i4.path1	TRINITY_DN48202_c0_g1_i2.path1
TRINITY_DN15959_c0_g1_i1.path1	TRINITY_DN34245_c0_g1_i1.path1	TRINITY_DN475_c0_g1_i14.path1	Pepsico1_Contig125.path2
Pepsico2_Contig19875.path1	novel.2305	novel.230	TRINITY_DN10752_c0_g1_i1.path2
TRINITY_DN39219_c0_g1_i1.path2	TRINITY_DN8174_c0_g1_i4.path1	TRINITY_DN969_c0_g2_i1.path1	TRINITY_DN9779_c1_g1_i1.path1
TRINITY_DN18599_c0_g1_i1.path2	Pepsico2_Contig7827.path1	TRINITY_DN32587_c0_g1_i1.path1	TRINITY_DN8283_c0_g1_i1.path1
novel.2029	novel.6018	novel.6376	Pepsico2_Contig8305.path1
novel.6560	TRINITY_DN30417_c0_g1_i2.path1	TRINITY_DN652_c0_g1_i1.path1	Pepsico1_Contig1236.path1
TRINITY_DN13319_c0_g2_i3.path1	TRINITY_DN90580_c0_g1_i1.path2	TRINITY_DN9851_c0_g1_i1.path1	TRINITY_DN14737_c0_g1_i1.path2
Pepsico1_Contig37669.path1	novel.609	TRINITY_DN27335_c0_g1_i1.path1	novel.8732
Pepsico2_Contig1658.path3	novel.587	novel.6730	novel.662
TRINITY_DN40534_c0_g2_i1.path1	Pepsico2_Contig5355.path1	TRINITY_DN36267_c0_g1_i2.path1	novel.5183
TRINITY_DN32774_c0_g1_i1.path1	novel.3381	TRINITY_DN16614_c0_g2_i1.path1	TRINITY_DN8084_c0_g1_i5.path1
TRINITY_DN33900_c0_g1_i1.path2	TRINITY_DN1599_c1_g1_i3.path1	novel.751	TRINITY_DN10325_c0_g2_i1.path2
Pepsico1_Contig377.path1	TRINITY_DN25572_c0_g1_i1.path2	novel.6786	TRINITY_DN59246_c0_g1_i1.path1
novel.6009	novel.3973	Pepsico2_Contig17842.path1	TRINITY_DN826_c0_g1_i8.path2
TRINITY_DN19336_c0_g1_i1.path1	TRINITY_DN50814_c0_g1_i6.path2	novel.3853	TRINITY_DN6139_c0_g2_i2.path1
TRINITY_DN75288_c0_g1_i1.path1	Pepsico1_Contig1806.path2	Pepsico2_Contig14140.path1	novel.6126
Pepsico2_Contig19268.path3	TRINITY_DN44006_c0_g1_i1.path2	TRINITY_DN21357_c0_g1_i1.path1	Pepsico2_Contig1721.path1
novel.5521	TRINITY_DN10738_c0_g2_i1.path1	Pepsico2_Contig4681.path1	TRINITY_DN7656_c0_g1_i1.path3
novel.8191	TRINITY_DN41090_c0_g1_i2.path2	novel.4572	Pepsico2_Contig11083.path1
TRINITY_DN976_c0_g1_i2.path2	TRINITY_DN1019_c0_g2_i1.path1	TRINITY_DN20750_c0_g1_i1.path1	TRINITY_DN6454_c0_g2_i1.path2
TRINITY_DN10094_c0_g3_i1.path1	Pepsico2_Contig17522.path1	TRINITY_DN31113_c0_g2_i2.path1	TRINITY_DN94140_c0_g1_i1.path2
novel.1503	TRINITY_DN31917_c0_g1_i1.path2	novel.7887	TRINITY_DN28819_c0_g1_i1.path1
TRINITY_DN11017_c0_g2_i4.path3	TRINITY_DN16015_c0_g2_i7.path1	TRINITY_DN40238_c1_g1_i1.path2	TRINITY_DN9421_c0_g2_i6.path1
TRINITY_DN27622_c0_g2_i1.path1	Pepsico2_Contig5026.path1	Pepsico2_Contig2560.path1	Pepsico2_Contig2029.path1
novel.2783	TRINITY_DN46359_c0_g1_i2.path1	TRINITY_DN8380_c0_g1_i5.path1	TRINITY_DN34417_c0_g2_i1.path1
TRINITY_DN79688_c0_g1_i1.path2	TRINITY_DN18168_c0_g1_i2.path1	TRINITY_DN13350_c0_g1_i1.path1	Pepsico2_Contig8195.path1
TRINITY_DN53496_c0_g1_i1.path1	Pepsico2_Contig11676.path1	Pepsico2_Contig5226.path1	TRINITY_DN81288_c0_g1_i1.path1
Pepsico1_Contig28290.path1	Pepsico2_Contig14622.path2	Pepsico2_Contig12692.path4	TRINITY_DN9647_c0_g1_i4.path1
Pepsico1_Contig6958.path2	TRINITY_DN92919_c0_g1_i1.path1	TRINITY_DN54354_c0_g2_i1.path1	Pepsico2_Contig4402.path1
TRINITY_DN26430_c0_g1_i2.path2	TRINITY_DN8683_c0_g1_i1.path2	TRINITY_DN72271_c0_g1_i1.path1	novel.5395
TRINITY_DN3368_c0_g1_i2.path1	TRINITY_DN90811_c0_g1_i1.path1	TRINITY_DN5857_c0_g1_i1.path1	TRINITY_DN1779_c0_g1_i10.path1
novel.1602	TRINITY_DN25287_c0_g3_i1.path1	TRINITY_DN6189_c0_g2_i2.path1	Pepsico2_Contig15286.path1
novel.3478	novel.751	Pepsico2_Contig14494.path1	TRINITY_DN15524_c0_g1_i1.path2
TRINITY_DN24079_c0_g1_i1.path1	TRINITY_DN18616_c0_g1_i4.path1	TRINITY_DN24782_c0_g1_i1.path2	TRINITY_DN22584_c1_g1_i1.path1
TRINITY_DN18561_c0_g1_i2.path2	TRINITY_DN363_c0_g1_i5.path1	Pepsico2_Contig7222.path1	TRINITY_DN16939_c0_g1_i2.path1
novel.2050	TRINITY_DN79353_c0_g1_i1.path1	TRINITY_DN31074_c1_g1_i1.path1	novel.2274
novel.9345	TRINITY_DN5319_c0_g1_i1.path2	TRINITY_DN11600_c0_g1_i1.path1	novel.1138
novel.7377	Pepsico2_Contig14670.path2	novel.42	novel.2454
TRINITY_DN12215_c0_g1_i3.path1	TRINITY_DN16015_c0_g1_i1.path1	novel.5781	novel.9142
Pepsico2_Contig7439.path1	Pepsico1_Contig1764.path1	Pepsico2_Contig11065.path1	TRINITY_DN37761_c0_g1_i1.path1
TRINITY_DN45925_c0_g1_i1.path1	Pepsico2_Contig4880.path1	TRINITY_DN90864_c0_g1_i1.path1	TRINITY_DN58406_c0_g1_i1.path2
TRINITY_DN12280_c0_g2_i1.path2	Pepsico2_Contig8203.path1	novel.662	novel.8002
Pepsico1_Contig2437.path1	TRINITY_DN13303_c0_g1_i1.path2	novel.2556	TRINITY_DN30879_c0_g1_i4.path1
novel.4288	novel.2138	Pepsico1_Contig1514.path1	Pepsico1_Contig1413.path1
novel.5786	novel.7150	TRINITY_DN18638_c0_g3_i1.path1	TRINITY_DN20622_c0_g1_i4.path1
novel.1430	TRINITY_DN43686_c0_g1_i1.path1	novel.1745	TRINITY_DN27339_c0_g1_i1.path1
TRINITY_DN19696_c0_g1_i3.path1	novel.4819	Pepsico2_Contig7978.path1	TRINITY_DN18259_c0_g1_i1.path1
novel.6783	TRINITY_DN12548_c0_g1_i3.path1	TRINITY_DN3582_c0_g1_i2.path2	TRINITY_DN32638_c0_g1_i1.path1
TRINITY_DN25387_c0_g2_i1.path1	Pepsico2_Contig6846.path2	novel.3628	novel.7730
novel.3293	TRINITY_DN2067_c0_g1_i1.path1	Pepsico2_Contig7954.path1	Pepsico2_Contig9433.path2
TRINITY_DN50781_c0_g1_i1.path1	TRINITY_DN1580_c0_g1_i4.path2	Pepsico1_Contig7769.path1	TRINITY_DN53636_c0_g1_i1.path1
TRINITY_DN28435_c0_g1_i6.path2	novel.7720	novel.7720	novel.7540
TRINITY_DN2145_c0_g1_i1.path1	novel.1805	Pepsico2_Contig14438.path1	novel.10027
TRINITY_DN7472_c0_g2_i1.path1	Pepsico2_Contig18850.path1	novel.2117	TRINITY_DN9696_c0_g1_i1.path2
Pepsico1_Contig1934.path1	Pepsico2_Contig19649.path2	novel.7569	TRINITY_DN4456_c0_g2_i10.path2
TRINITY_DN26902_c0_g1_i1.path1	TRINITY_DN2208_c0_g1_i8.path1	Pepsico2_Contig6329.path1	TRINITY_DN17321_c0_g1_i4.path2
novel.5200	Pepsico1_Contig2324.path2	Pepsico1_Contig3912.path1	novel.10240
TRINITY_DN8230_c0_g1_i1.path1	Pepsico2_Contig8448.path3	TRINITY_DN27095_c0_g1_i1.path1	TRINITY_DN102574_c0_g1_i1.path1
TRINITY_DN11151_c0_g1_i1.path1	Pepsico2_Contig752.path1	TRINITY_DN90920_c0_g1_i1.path1	TRINITY_DN21607_c0_g3_i3.path1
TRINITY_DN3870_c0_g1_i1.path1	Pepsico2_Contig13906.path2	novel.6509	Pepsico2_Contig14558.path1
novel.7536	TRINITY_DN32319_c0_g1_i1.path1	Pepsico1_Contig350.path1	TRINITY_DN7122_c0_g1_i3.path1
TRINITY_DN59441_c0_g1_i2.path1	TRINITY_DN571_c0_g1_i1.path1	TRINITY_DN11985_c0_g1_i1.path2	Pepsico2_Contig8488.path1
Pepsico2_Contig20256.path1	Pepsico1_Contig2161.path2	TRINITY_DN67035_c0_g1_i1.path1	novel.1260
TRINITY_DN18638_c0_g3_i1.path1	TRINITY_DN99572_c0_g1_i1.path1	Pepsico2_Contig15286.path1	novel.8211
Pepsico1_Contig4717.path2	Pepsico2_Contig7603.path2	TRINITY_DN29788_c0_g1_i1.path1	Pepsico2_Contig5547.path1
Pepsico2_Contig2029.path1	novel.833	novel.899	TRINITY_DN3543_c0_g1_i5.path1
novel.10530	TRINITY_DN16818_c0_g3_i1.path1	novel.1568	TRINITY_DN9998_c0_g2_i1.path1
Pepsico1_Contig1284.path1	TRINITY_DN82631_c0_g1_i1.path2	TRINITY_DN4484_c1_g1_i2.path1	Pepsico2_Contig14825.path1
TRINITY_DN22677_c0_g2_i1.path2	TRINITY_DN100672_c0_g1_i1.path1	TRINITY_DN13274_c0_g1_i1.path1	Pepsico2_Contig19981.path1
Pepsico1_Contig474.path1	TRINITY_DN22092_c0_g1_i2.path1	novel.9200	novel.1626
TRINITY_DN22438_c0_g2_i1.path1	TRINITY_DN4444_c0_g1_i1.path1	TRINITY_DN7311_c0_g1_i1.path1	Pepsico2_Contig19613.path1
TRINITY_DN53274_c0_g1_i1.path1	novel.2412	TRINITY_DN34221_c0_g1_i1.path2	Pepsico2_Contig11219.path2
TRINITY_DN13777_c0_g1_i4.path1	Pepsico2_Contig19308.path1	Pepsico2_Contig6525.path1	TRINITY_DN10547_c0_g1_i17.path1
novel.762	Pepsico2_Contig12291.path1	Pepsico2_Contig748.path1	Pepsico2_Contig1752.path1
Pepsico2_Contig4432.path1	TRINITY_DN97221_c0_g1_i1.path1	TRINITY_DN14497_c0_g1_i2.path1	TRINITY_DN25120_c0_g1_i1.path1
novel.1989	novel.4555	TRINITY_DN15559_c0_g2_i2.path2	Pepsico1_Contig350.path1
TRINITY_DN6463_c0_g1_i1.path1	novel.9629	TRINITY_DN21323_c0_g1_i1.path1	TRINITY_DN10280_c0_g1_i1.path1
TRINITY_DN743_c0_g1_i3.path2	TRINITY_DN9370_c0_g2_i1.path1	TRINITY_DN3842_c0_g4_i2.path2	TRINITY_DN10166_c0_g1_i1.path1
TRINITY_DN56274_c0_g1_i1.path1	Pepsico2_Contig4658.path1	TRINITY_DN12952_c0_g5_i1.path1	TRINITY_DN8779_c0_g2_i3.path2
TRINITY_DN80123_c0_g1_i1.path1	TRINITY_DN2414_c0_g2_i1.path1	TRINITY_DN97533_c0_g1_i1.path1	novel.9972
TRINITY_DN23942_c1_g1_i1.path1	TRINITY_DN87482_c0_g1_i1.path1	TRINITY_DN58406_c0_g1_i1.path2	TRINITY_DN7516_c0_g1_i1.path1
TRINITY_DN4444_c0_g1_i1.path1	Pepsico1_Contig3093.path2	Pepsico2_Contig11017.path2	TRINITY_DN19468_c0_g2_i2.path1
novel.7481	TRINITY_DN8330_c0_g1_i2.path1	Pepsico2_Contig10033.path1	novel.4846
Pepsico1_Contig3259.path1	novel.9761	Pepsico1_Contig874.path1	TRINITY_DN29865_c0_g1_i1.path2
TRINITY_DN5939_c0_g3_i1.path1	TRINITY_DN102914_c0_g1_i1.path1	TRINITY_DN10806_c1_g2_i8.path2	TRINITY_DN21686_c1_g1_i1.path1
novel.7641	TRINITY_DN24759_c0_g1_i3.path1	novel.9025	Pepsico2_Contig12502.path1
Pepsico2_Contig8591.path1	TRINITY_DN743_c0_g1_i3.path2	Pepsico2_Contig19596.path1	TRINITY_DN27643_c1_g1_i1.path1
novel.4650	Pepsico1_Contig1883.path1	novel.9649	Pepsico2_Contig32.path1
TRINITY_DN49805_c0_g1_i1.path2	TRINITY_DN41201_c0_g1_i1.path2	Pepsico2_Contig19525.path2	TRINITY_DN36995_c0_g2_i1.path1
TRINITY_DN44445_c0_g1_i1.path1	TRINITY_DN12836_c0_g1_i3.path1	novel.739	Pepsico2_Contig5536.path1
TRINITY_DN6125_c0_g1_i3.path1	TRINITY_DN10097_c0_g1_i2.path1	TRINITY_DN14943_c0_g4_i1.path1	TRINITY_DN17095_c0_g1_i2.path1
TRINITY_DN31531_c1_g1_i1.path1	TRINITY_DN9421_c0_g1_i1.path1	novel.7557	TRINITY_DN15215_c0_g1_i1.path1
novel.447	TRINITY_DN21506_c0_g1_i1.path1	Pepsico1_Contig1024.path1	TRINITY_DN1139_c0_g1_i1.path1
TRINITY_DN23121_c0_g2_i1.path2	novel.9609	TRINITY_DN87_c0_g1_i1.path2	TRINITY_DN13274_c0_g1_i1.path1
novel.4550	TRINITY_DN103453_c0_g1_i1.path1	Pepsico1_Contig26918.path1	Pepsico2_Contig37.path1
novel.9630	novel.3010	TRINITY_DN10166_c0_g1_i1.path1	TRINITY_DN40776_c0_g1_i1.path1
novel.9596	novel.4717	TRINITY_DN55197_c0_g1_i1.path1	TRINITY_DN71899_c0_g1_i2.path1
TRINITY_DN11154_c0_g3_i1.path1	Pepsico2_Contig3282.path1	novel.6814	TRINITY_DN16513_c0_g1_i5.path1
TRINITY_DN16102_c0_g1_i2.path1	TRINITY_DN67948_c0_g1_i1.path1	TRINITY_DN87711_c0_g1_i1.path2	novel.7513
TRINITY_DN4132_c0_g2_i1.path1	Pepsico2_Contig3519.path1	Pepsico1_Contig264.path1	TRINITY_DN14047_c1_g1_i2.path1
TRINITY_DN10806_c1_g3_i2.path1	novel.3837	TRINITY_DN24292_c0_g1_i4.path1	TRINITY_DN40238_c1_g1_i1.path2
TRINITY_DN23496_c0_g1_i2.path2	Pepsico1_Contig1762.path1	Pepsico1_Contig2484.path1	novel.6168
novel.2138	TRINITY_DN27622_c0_g2_i1.path1	TRINITY_DN62636_c0_g1_i1.path1	TRINITY_DN33391_c0_g1_i1.path1
TRINITY_DN40112_c0_g1_i1.path1	TRINITY_DN108401_c0_g1_i1.path1	TRINITY_DN24316_c0_g2_i1.path1	TRINITY_DN35164_c0_g1_i1.path2
TRINITY_DN19018_c0_g1_i1.path1	TRINITY_DN21996_c0_g1_i1.path1	TRINITY_DN19573_c0_g1_i1.path1	TRINITY_DN22881_c0_g1_i4.path2
novel.5782	novel.3753	novel.6646	Pepsico1_Contig7922.path1
TRINITY_DN21247_c0_g1_i2.path1	TRINITY_DN14607_c0_g1_i1.path1	Pepsico1_Contig23776.path2	novel.1742
TRINITY_DN15518_c0_g1_i5.path1	novel.9996	novel.2683	TRINITY_DN101698_c0_g1_i1.path1
TRINITY_DN57536_c0_g1_i1.path1	TRINITY_DN3623_c1_g1_i3.path1	novel.1603	TRINITY_DN80711_c0_g1_i1.path3
TRINITY_DN14775_c0_g1_i8.path1	TRINITY_DN3104_c1_g2_i1.path1	TRINITY_DN22103_c0_g1_i1.path1	TRINITY_DN12573_c0_g1_i1.path1
novel.7733	TRINITY_DN8414_c0_g1_i2.path1	TRINITY_DN52375_c0_g1_i2.path1	TRINITY_DN19150_c0_g1_i2.path1
TRINITY_DN5227_c0_g1_i1.path1	Pepsico1_Contig2161.path1	TRINITY_DN21996_c0_g1_i1.path1	TRINITY_DN4360_c2_g1_i3.path1
TRINITY_DN22196_c0_g3_i1.path1	Pepsico2_Contig20597.path2	TRINITY_DN26408_c0_g1_i1.path1	Pepsico2_Contig651.path2
novel.7235	TRINITY_DN10198_c0_g1_i1.path1	Pepsico2_Contig2152.path1	novel.3761
Pepsico2_Contig7773.path2	Pepsico2_Contig9173.path1	TRINITY_DN109564_c0_g1_i1.path1	TRINITY_DN7830_c0_g1_i1.path1
TRINITY_DN8652_c0_g1_i6.path1	TRINITY_DN16257_c1_g1_i5.path1	TRINITY_DN51234_c0_g1_i1.path1	novel.5890
TRINITY_DN47192_c0_g1_i1.path1	novel.8437	TRINITY_DN55287_c0_g1_i1.path4	TRINITY_DN1968_c0_g1_i4.path2
novel.10554	TRINITY_DN19058_c0_g1_i1.path1	TRINITY_DN11920_c1_g2_i1.path1	TRINITY_DN15613_c0_g1_i3.path1
Pepsico1_Contig3446.path1	TRINITY_DN9851_c0_g1_i1.path1	Pepsico2_Contig6534.path1	novel.2818
Pepsico2_Contig16793.path1	novel.3990	TRINITY_DN2414_c1_g1_i3.path1	TRINITY_DN15282_c0_g1_i1.path1
novel.2949	TRINITY_DN14594_c0_g2_i1.path1	novel.661	TRINITY_DN79513_c0_g1_i1.path1
TRINITY_DN26545_c0_g1_i1.path1	TRINITY_DN18326_c0_g1_i2.path1	TRINITY_DN5056_c0_g1_i2.path1	novel.8808
Pepsico1_Contig28355.path1	novel.3081	novel.3381	Pepsico2_Contig14912.path1
Pepsico2_Contig13855.path1	TRINITY_DN13315_c0_g1_i3.path1	novel.415	novel.7044
Pepsico2_Contig19452.path1	TRINITY_DN17732_c0_g6_i1.path1	novel.6605	novel.8257
Pepsico2_Contig12129.path1	TRINITY_DN23068_c0_g1_i2.path1	Pepsico2_Contig4732.path1	TRINITY_DN5876_c0_g2_i1.path1
TRINITY_DN29796_c0_g1_i1.path1	Pepsico1_Contig538.path1	TRINITY_DN32638_c0_g1_i1.path1	novel.2117
TRINITY_DN29329_c0_g2_i1.path1	TRINITY_DN2377_c0_g1_i1.path2	novel.2707	novel.1993
TRINITY_DN47580_c1_g1_i1.path1	TRINITY_DN63001_c0_g1_i1.path1	TRINITY_DN80711_c0_g1_i1.path3	novel.3858
TRINITY_DN9742_c0_g1_i1.path1	novel.1363	TRINITY_DN429_c0_g1_i1.path1	novel.8916
TRINITY_DN70647_c0_g1_i1.path1	Pepsico2_Contig3516.path1	TRINITY_DN37508_c0_g1_i2.path1	TRINITY_DN11985_c0_g1_i1.path1
TRINITY_DN63267_c0_g1_i1.path2	Pepsico2_Contig779.path1	TRINITY_DN10981_c1_g1_i2.path1	TRINITY_DN46714_c0_g1_i1.path1
TRINITY_DN6441_c0_g1_i2.path2	novel.4131	TRINITY_DN4887_c0_g1_i6.path1	TRINITY_DN16509_c1_g1_i2.path2
TRINITY_DN2518_c0_g1_i3.path1	Pepsico1_Contig33714.path1	TRINITY_DN20528_c0_g1_i1.path1	TRINITY_DN648_c1_g1_i8.path2
TRINITY_DN10277_c0_g1_i1.path1	novel.2621	Pepsico2_Contig8201.path1	novel.3578
TRINITY_DN14379_c0_g2_i1.path1	novel.5347	novel.7309	Pepsico1_Contig788.path1
Pepsico2_Contig20125.path2	TRINITY_DN16257_c1_g1_i5.path2	novel.6722	TRINITY_DN1803_c3_g1_i1.path1
novel.729	TRINITY_DN16362_c0_g1_i1.path1	TRINITY_DN45534_c0_g1_i1.path3	TRINITY_DN976_c0_g1_i2.path2
TRINITY_DN28857_c0_g1_i1.path1	TRINITY_DN18095_c0_g1_i1.path1	TRINITY_DN37342_c0_g2_i1.path1	TRINITY_DN5010_c0_g1_i1.path1
TRINITY_DN18478_c0_g1_i1.path1	TRINITY_DN9169_c0_g1_i1.path2	Pepsico1_Contig2787.path1	novel.7707
TRINITY_DN24060_c0_g2_i1.path2	TRINITY_DN38367_c0_g1_i1.path1	novel.768	novel.2234
TRINITY_DN37167_c0_g1_i1.path1	Pepsico1_Contig5249.path1	TRINITY_DN39335_c0_g1_i1.path1	TRINITY_DN14167_c0_g1_i1.path1
TRINITY_DN15092_c0_g1_i1.path1	TRINITY_DN16279_c0_g1_i1.path3	TRINITY_DN24825_c0_g4_i2.path1	TRINITY_DN9421_c0_g1_i1.path1
Pepsico2_Contig14733.path1	Pepsico1_Contig97.path1	novel.9659	TRINITY_DN32075_c0_g5_i3.path1
TRINITY_DN20286_c0_g1_i1.path2	novel.4014	novel.5379	novel.1448
TRINITY_DN27955_c0_g1_i1.path1	Pepsico2_Contig10618.path1	TRINITY_DN26832_c0_g1_i2.path1	TRINITY_DN10806_c1_g2_i8.path1
Pepsico2_Contig7517.path2	TRINITY_DN56076_c0_g1_i1.path1	TRINITY_DN6929_c1_g1_i4.path1	TRINITY_DN99452_c0_g1_i1.path1
TRINITY_DN22248_c0_g1_i1.path1	Pepsico1_Contig106.path1	TRINITY_DN6860_c0_g1_i1.path1	TRINITY_DN13830_c1_g1_i1.path1
Pepsico1_Contig964.path1	Pepsico2_Contig4726.path1	novel.8144	novel.10112
TRINITY_DN11349_c0_g1_i2.path2	TRINITY_DN36132_c0_g1_i1.path1	TRINITY_DN1779_c0_g1_i10.path1	Pepsico2_Contig19238.path1
TRINITY_DN19900_c0_g2_i1.path1	Pepsico2_Contig2618.path1	Pepsico2_Contig6463.path1	TRINITY_DN6101_c0_g1_i2.path1
TRINITY_DN23712_c0_g3_i1.path1	TRINITY_DN45534_c0_g1_i1.path2	Pepsico2_Contig4715.path1	TRINITY_DN88632_c0_g1_i1.path1
TRINITY_DN3800_c0_g1_i5.path1	TRINITY_DN98409_c0_g1_i1.path1	novel.2734	novel.678
TRINITY_DN20489_c0_g1_i1.path1	Pepsico2_Contig20063.path1	TRINITY_DN8132_c0_g1_i1.path1	TRINITY_DN20691_c0_g2_i1.path2
TRINITY_DN21511_c0_g1_i1.path1	novel.9345	TRINITY_DN27622_c0_g2_i1.path1	TRINITY_DN18140_c1_g1_i1.path2
TRINITY_DN9923_c0_g1_i1.path1	TRINITY_DN56621_c0_g2_i1.path1	Pepsico2_Contig6015.path1	Pepsico1_Contig843.path1
Pepsico2_Contig3785.path2	novel.6924	Pepsico2_Contig1718.path1	TRINITY_DN55872_c0_g1_i1.path1
TRINITY_DN60733_c0_g1_i1.path1	novel.813	novel.6856	novel.1561
TRINITY_DN97402_c0_g1_i1.path1	Pepsico2_Contig13244.path1	TRINITY_DN10471_c0_g2_i1.path1	TRINITY_DN6784_c0_g1_i1.path1
novel.1264	Pepsico2_Contig20125.path2	novel.7047	novel.4821
TRINITY_DN2098_c0_g2_i1.path1	novel.3116	Pepsico2_Contig12882.path1	novel.1064
TRINITY_DN35292_c0_g1_i2.path2	TRINITY_DN67103_c0_g1_i1.path1	novel.560	Pepsico2_Contig1066.path1
TRINITY_DN11147_c0_g1_i1.path1	novel.9940	novel.9574	Pepsico2_Contig746.path1
TRINITY_DN10842_c0_g1_i1.path2	Pepsico1_Contig32533.path1	TRINITY_DN9209_c0_g1_i7.path1	TRINITY_DN9851_c0_g1_i1.path1
Pepsico2_Contig20139.path1	TRINITY_DN21706_c0_g1_i3.path1	Pepsico2_Contig20487.path1	TRINITY_DN20691_c0_g1_i1.path2
novel.8819	novel.9743	TRINITY_DN14314_c0_g2_i2.path1	novel.3496
novel.9973	TRINITY_DN57594_c0_g1_i1.path1	TRINITY_DN10640_c0_g1_i1.path1	TRINITY_DN17959_c1_g1_i1.path1
Pepsico1_Contig1762.path1	novel.6158	TRINITY_DN9225_c0_g1_i1.path1	TRINITY_DN11150_c1_g2_i1.path1
novel.183	TRINITY_DN9952_c0_g3_i1.path2	TRINITY_DN4780_c1_g1_i1.path1	TRINITY_DN9120_c1_g1_i2.path1
novel.886	TRINITY_DN100308_c0_g1_i1.path1	Pepsico2_Contig10427.path1	novel.1105
TRINITY_DN14002_c0_g1_i6.path1	TRINITY_DN48060_c0_g1_i1.path1	TRINITY_DN43075_c0_g1_i2.path2	TRINITY_DN13963_c0_g1_i1.path1
TRINITY_DN34444_c0_g1_i1.path1	Pepsico1_Contig1503.path1	Pepsico2_Contig16967.path1	TRINITY_DN38268_c0_g1_i1.path1
TRINITY_DN16156_c0_g2_i1.path1	Pepsico2_Contig11644.path1	novel.2170	novel.5167
TRINITY_DN45843_c0_g1_i1.path2	Pepsico1_Contig714.path2	TRINITY_DN56274_c0_g1_i1.path1	TRINITY_DN15885_c0_g1_i1.path2
TRINITY_DN9047_c1_g1_i3.path2	novel.2556	Pepsico1_Contig37105.path1	TRINITY_DN115202_c0_g1_i1.path1
TRINITY_DN19760_c0_g1_i2.path2	novel.4804	TRINITY_DN15695_c0_g1_i3.path1	TRINITY_DN8929_c0_g1_i2.path1
novel.2890	TRINITY_DN5319_c0_g1_i1.path1	Pepsico2_Contig8195.path1	novel.3971
TRINITY_DN40802_c0_g3_i1.path2	novel.263	novel.4225	TRINITY_DN6633_c0_g1_i5.path2
TRINITY_DN12156_c0_g2_i1.path1	Pepsico2_Contig12764.path1	TRINITY_DN1605_c0_g2_i3.path1	TRINITY_DN15272_c1_g1_i1.path2
novel.1431	Pepsico1_Contig2324.path1	TRINITY_DN8001_c0_g1_i3.path1	Pepsico2_Contig3010.path1
novel.1785	Pepsico1_Contig337.path1	TRINITY_DN21752_c0_g1_i2.path2	TRINITY_DN8445_c0_g2_i1.path1
Pepsico2_Contig9173.path1	Pepsico2_Contig1104.path1	TRINITY_DN14014_c0_g3_i1.path1	TRINITY_DN78750_c0_g1_i1.path1
Pepsico2_Contig17057.path1	novel.4958	Pepsico2_Contig3516.path1	TRINITY_DN32319_c0_g1_i1.path1
Pepsico2_Contig11676.path1	TRINITY_DN72_c1_g1_i2.path1	Pepsico2_Contig752.path1	Pepsico2_Contig836.path1
Pepsico2_Contig6858.path1	novel.886	TRINITY_DN115202_c0_g1_i1.path1	Pepsico2_Contig8620.path1
TRINITY_DN8500_c0_g1_i2.path1	Pepsico2_Contig14260.path1	Pepsico2_Contig9040.path1	TRINITY_DN8132_c0_g1_i1.path1
TRINITY_DN8789_c0_g2_i3.path1	novel.1031	TRINITY_DN10620_c0_g2_i1.path1	novel.2510
TRINITY_DN8599_c1_g1_i3.path2	Pepsico2_Contig648.path1	TRINITY_DN8652_c0_g1_i6.path1	TRINITY_DN15269_c0_g1_i2.path1
Pepsico2_Contig20416.path1	novel.1627	novel.6924	TRINITY_DN12947_c0_g1_i4.path1
Pepsico1_Contig107.path1	TRINITY_DN24307_c0_g1_i1.path1	Pepsico1_Contig886.path1	novel.3926
Pepsico2_Contig11065.path1	novel.1378	TRINITY_DN103002_c0_g1_i1.path1	TRINITY_DN30_c4_g1_i1.path1
TRINITY_DN8121_c0_g1_i8.path1	novel.4380	novel.4987	TRINITY_DN30131_c0_g1_i2.path1
TRINITY_DN19139_c0_g1_i1.path1	TRINITY_DN10134_c0_g1_i1.path1	Pepsico2_Contig19613.path1	TRINITY_DN13991_c0_g2_i3.path1
TRINITY_DN13858_c0_g1_i1.path1	TRINITY_DN33361_c0_g1_i5.path2	TRINITY_DN11271_c0_g1_i3.path2	TRINITY_DN693_c1_g1_i1.path1
novel.4397	novel.5923	TRINITY_DN107150_c0_g1_i1.path1	TRINITY_DN108478_c0_g1_i1.path4
TRINITY_DN36019_c1_g1_i1.path1	Pepsico1_Contig106.path2	TRINITY_DN18366_c0_g1_i1.path2	Pepsico2_Contig14438.path1
TRINITY_DN29582_c0_g6_i1.path1	TRINITY_DN30_c4_g1_i1.path1	novel.121	TRINITY_DN35686_c0_g2_i1.path1
TRINITY_DN5721_c0_g1_i1.path1	novel.9957	TRINITY_DN8868_c0_g1_i1.path1	Pepsico2_Contig18065.path1
TRINITY_DN79283_c0_g1_i1.path1	TRINITY_DN16702_c0_g1_i1.path1	TRINITY_DN4132_c1_g1_i1.path1	TRINITY_DN3659_c2_g1_i1.path5
TRINITY_DN6133_c4_g1_i1.path1	novel.4975	Pepsico1_Contig10997.path1	TRINITY_DN13072_c1_g1_i2.path1
TRINITY_DN8516_c0_g1_i1.path1	Pepsico2_Contig17168.path2	TRINITY_DN29095_c0_g2_i1.path1	novel.2676
TRINITY_DN29419_c0_g3_i1.path1	Pepsico2_Contig7935.path1	TRINITY_DN72382_c0_g1_i1.path1	TRINITY_DN9686_c0_g2_i1.path1
TRINITY_DN6101_c0_g1_i2.path1	Pepsico2_Contig5547.path1	Pepsico1_Contig6573.path1	TRINITY_DN11954_c0_g1_i6.path1
Pepsico2_Contig9370.path1	novel.10318	TRINITY_DN102914_c0_g1_i1.path1	TRINITY_DN25377_c0_g1_i2.path1
Pepsico2_Contig20315.path2	TRINITY_DN46218_c0_g1_i1.path1	TRINITY_DN5939_c0_g3_i1.path1	novel.4358
Pepsico2_Contig20286.path1	TRINITY_DN475_c0_g1_i14.path1	Pepsico1_Contig521.path1	Pepsico2_Contig19818.path1
novel.2391	TRINITY_DN6189_c0_g2_i2.path1	Pepsico2_Contig6260.path2	novel.9360
Pepsico2_Contig5608.path2	TRINITY_DN693_c1_g1_i1.path1	novel.1981	novel.8779
TRINITY_DN27357_c0_g1_i1.path2	TRINITY_DN15215_c0_g3_i1.path2	TRINITY_DN3070_c1_g1_i2.path1	Pepsico2_Contig17756.path1
TRINITY_DN7311_c0_g1_i1.path1	Pepsico1_Contig6612.path2	TRINITY_DN2365_c0_g1_i15.path1	novel.4987
novel.2908	TRINITY_DN8322_c0_g1_i1.path1	TRINITY_DN113966_c0_g1_i1.path1	novel.2516
Pepsico2_Contig10959.path1	TRINITY_DN21408_c0_g2_i1.path1	TRINITY_DN693_c1_g1_i1.path1	Pepsico1_Contig6958.path2
Pepsico2_Contig15309.path1	novel.8191	TRINITY_DN2377_c0_g1_i1.path1	Pepsico2_Contig6611.path5
novel.6304	Pepsico2_Contig17090.path1	TRINITY_DN3212_c0_g1_i1.path1	Pepsico2_Contig13792.path1
TRINITY_DN7780_c1_g3_i1.path1	Pepsico2_Contig14533.path1	TRINITY_DN80397_c0_g1_i1.path1	TRINITY_DN11593_c1_g2_i1.path1
novel.5379	TRINITY_DN103518_c0_g1_i1.path1	TRINITY_DN5321_c0_g1_i10.path1	TRINITY_DN69868_c0_g1_i1.path1
novel.9724	TRINITY_DN43227_c1_g1_i2.path1	TRINITY_DN320_c0_g1_i1.path1	TRINITY_DN14943_c0_g1_i1.path1
novel.3582	TRINITY_DN31076_c0_g1_i4.path1	TRINITY_DN1623_c1_g1_i8.path2	novel.1405
TRINITY_DN32661_c0_g1_i1.path2	TRINITY_DN49805_c0_g1_i1.path1	TRINITY_DN5449_c0_g2_i1.path1	TRINITY_DN20488_c0_g1_i4.path1
TRINITY_DN70144_c0_g1_i1.path1	novel.3663	TRINITY_DN5232_c0_g1_i7.path1	novel.8182
TRINITY_DN19793_c0_g1_i1.path1	Pepsico2_Contig17548.path1	Pepsico2_Contig5200.path1	Pepsico2_Contig2202.path1
Pepsico2_Contig11289.path2	Pepsico1_Contig6573.path1	TRINITY_DN5135_c0_g2_i1.path1	novel.9078
Pepsico2_Contig13689.path3	TRINITY_DN9898_c0_g2_i1.path1	TRINITY_DN22219_c0_g1_i1.path1	TRINITY_DN41217_c0_g1_i1.path1
TRINITY_DN18203_c0_g2_i1.path1	Pepsico1_Contig874.path1	Pepsico2_Contig17730.path1	novel.8487
Pepsico1_Contig2488.path2	TRINITY_DN20165_c0_g1_i1.path1	TRINITY_DN4444_c0_g1_i1.path1	TRINITY_DN16801_c1_g3_i1.path1
Pepsico2_Contig19977.path1	novel.1572	TRINITY_DN30879_c0_g1_i4.path1	TRINITY_DN32451_c0_g1_i2.path1
TRINITY_DN24494_c0_g1_i1.path1	TRINITY_DN37972_c0_g1_i2.path1	novel.813	TRINITY_DN16589_c0_g3_i3.path1
novel.1742	TRINITY_DN8868_c0_g1_i1.path1	Pepsico2_Contig11242.path1	novel.8506
TRINITY_DN46218_c0_g1_i1.path1	TRINITY_DN86212_c0_g1_i1.path1	TRINITY_DN61508_c0_g1_i1.path1	TRINITY_DN33707_c0_g1_i5.path1
TRINITY_DN41297_c0_g1_i1.path1	TRINITY_DN29271_c0_g1_i2.path1	Pepsico2_Contig17682.path1	Pepsico1_Contig4681.path1
TRINITY_DN15282_c0_g1_i1.path1	TRINITY_DN4289_c0_g1_i2.path1	novel.5378	TRINITY_DN8414_c0_g1_i2.path1
TRINITY_DN16825_c2_g1_i1.path1	novel.6856	TRINITY_DN29785_c0_g1_i1.path1	TRINITY_DN5076_c0_g1_i5.path1
TRINITY_DN14909_c0_g1_i4.path2	TRINITY_DN3020_c0_g1_i3.path2	TRINITY_DN34621_c0_g1_i1.path2	TRINITY_DN21245_c0_g1_i1.path1
Pepsico2_Contig27.path1	TRINITY_DN32451_c0_g1_i2.path1	TRINITY_DN12040_c0_g1_i15.path2	novel.4585
novel.2189	TRINITY_DN15185_c0_g3_i5.path1	TRINITY_DN10118_c0_g1_i2.path1	TRINITY_DN24825_c0_g4_i2.path1
TRINITY_DN34245_c0_g1_i1.path1	novel.3883	TRINITY_DN33391_c0_g1_i1.path1	Pepsico2_Contig6405.path1
TRINITY_DN25488_c0_g1_i10.path2	Pepsico2_Contig4851.path1	TRINITY_DN11593_c1_g2_i1.path1	TRINITY_DN18292_c0_g3_i1.path1
TRINITY_DN29271_c0_g1_i2.path3	Pepsico2_Contig13844.path1	Pepsico2_Contig7935.path1	TRINITY_DN1201_c2_g1_i2.path1
novel.2850	novel.3593	Pepsico2_Contig8794.path2	TRINITY_DN16522_c0_g1_i3.path2
novel.9555	Pepsico2_Contig13121.path1	Pepsico1_Contig3406.path1	TRINITY_DN90920_c0_g1_i1.path1
TRINITY_DN1178_c0_g1_i5.path1	novel.1138	TRINITY_DN19392_c0_g2_i1.path1	TRINITY_DN933_c0_g1_i4.path1
novel.3878	TRINITY_DN10190_c0_g1_i5.path1	TRINITY_DN7357_c0_g2_i1.path1	TRINITY_DN34195_c0_g1_i2.path2
TRINITY_DN100588_c0_g1_i1.path1	TRINITY_DN12603_c0_g1_i2.path1	Pepsico2_Contig19554.path1	Pepsico2_Contig6534.path1
TRINITY_DN4419_c0_g1_i1.path1	TRINITY_DN15593_c0_g1_i1.path1	Pepsico2_Contig3476.path1	TRINITY_DN26281_c0_g2_i1.path1
TRINITY_DN108492_c0_g1_i1.path1	novel.6558	TRINITY_DN20622_c0_g1_i4.path1	TRINITY_DN26262_c0_g1_i1.path1
TRINITY_DN59863_c0_g1_i1.path1	Pepsico2_Contig7855.path1	TRINITY_DN6470_c2_g1_i3.path2	TRINITY_DN114404_c0_g1_i1.path1
TRINITY_DN8715_c0_g1_i2.path2	novel.10607	TRINITY_DN648_c1_g1_i8.path2	novel.4694
TRINITY_DN30899_c0_g2_i1.path1	Pepsico2_Contig17640.path1	TRINITY_DN20603_c1_g1_i1.path1	TRINITY_DN27052_c0_g1_i1.path1
Pepsico2_Contig19695.path1	TRINITY_DN6911_c0_g2_i1.path3	TRINITY_DN17466_c0_g1_i1.path1	novel.1785
Pepsico2_Contig17145.path1	novel.4598	Pepsico1_Contig2008.path3	Pepsico1_Contig32727.path1
novel.9278	Pepsico2_Contig18181.path1	TRINITY_DN96191_c0_g1_i1.path1	novel.1079
TRINITY_DN3985_c0_g1_i1.path3	TRINITY_DN13108_c0_g1_i1.path1	novel.10237	novel.8901
novel.2108	novel.8363	novel.5848	TRINITY_DN2567_c0_g1_i1.path3
Pepsico1_Contig474.path2	TRINITY_DN19720_c0_g1_i1.path1	TRINITY_DN2492_c0_g1_i1.path1	TRINITY_DN95487_c0_g1_i1.path1
TRINITY_DN32850_c0_g1_i2.path1	novel.6272	novel.5890	TRINITY_DN24554_c0_g1_i1.path1
TRINITY_DN103192_c0_g1_i1.path1	TRINITY_DN34544_c0_g1_i2.path1	Pepsico1_Contig22394.path1	novel.5418
Pepsico2_Contig12914.path1	TRINITY_DN9236_c0_g2_i5.path1	TRINITY_DN17502_c0_g1_i2.path1	TRINITY_DN27832_c0_g1_i1.path2
novel.5000	TRINITY_DN6817_c2_g1_i1.path1	TRINITY_DN14383_c0_g2_i2.path1	Pepsico1_Contig1106.path1
novel.1432	TRINITY_DN6572_c0_g1_i5.path1	Pepsico1_Contig5497.path1	Pepsico2_Contig752.path1
TRINITY_DN16015_c0_g1_i1.path1	TRINITY_DN2385_c0_g1_i1.path2	Pepsico2_Contig6846.path1	TRINITY_DN33468_c0_g1_i2.path1
Pepsico2_Contig17816.path1	novel.7597	Pepsico2_Contig2217.path1	Pepsico2_Contig9173.path1
TRINITY_DN105105_c0_g1_i1.path1	TRINITY_DN42787_c0_g1_i1.path1	novel.8212	Pepsico1_Contig6629.path1
TRINITY_DN37672_c0_g1_i1.path1	TRINITY_DN7521_c0_g1_i1.path1	TRINITY_DN16295_c0_g1_i1.path2	novel.3001
TRINITY_DN83476_c0_g1_i1.path1	TRINITY_DN26545_c0_g1_i1.path1	TRINITY_DN14167_c0_g1_i1.path1	novel.1098
Pepsico2_Contig3621.path1	Pepsico1_Contig5679.path3	novel.8009	TRINITY_DN10612_c0_g1_i14.path1
TRINITY_DN65595_c0_g1_i1.path1	Pepsico1_Contig6958.path2	TRINITY_DN11768_c0_g1_i1.path1	TRINITY_DN11167_c2_g1_i1.path1
novel.6018	novel.5499	Pepsico2_Contig4029.path1	Pepsico1_Contig3191.path2
Pepsico1_Contig874.path1	TRINITY_DN33979_c0_g1_i1.path1	Pepsico2_Contig11038.path1	TRINITY_DN6995_c1_g2_i1.path2
TRINITY_DN22584_c0_g3_i1.path1	Pepsico1_Contig2431.path1	TRINITY_DN3070_c1_g1_i2.path2	TRINITY_DN49172_c0_g1_i1.path1
novel.3330	Pepsico2_Contig20286.path1	novel.2601	Pepsico1_Contig4097.path1
TRINITY_DN1553_c0_g1_i3.path1	TRINITY_DN31074_c0_g1_i2.path2	TRINITY_DN14594_c0_g1_i1.path1	TRINITY_DN29903_c0_g1_i2.path1
Pepsico2_Contig10332.path1	TRINITY_DN18692_c2_g1_i1.path1	Pepsico1_Contig36.path1	TRINITY_DN15559_c0_g2_i2.path2
TRINITY_DN24357_c1_g1_i3.path1	Pepsico2_Contig17849.path1	novel.3694	novel.3837
novel.8428	TRINITY_DN24420_c0_g1_i1.path1	TRINITY_DN34252_c0_g1_i1.path1	novel.6363
Pepsico1_Contig2631.path1	TRINITY_DN15372_c0_g1_i1.path1	TRINITY_DN16150_c0_g1_i1.path2	TRINITY_DN14737_c0_g1_i1.path1
TRINITY_DN101411_c0_g1_i1.path1	novel.7290	novel.8294	TRINITY_DN11307_c0_g2_i1.path1
Pepsico2_Contig19795.path2	Pepsico2_Contig17803.path1	novel.5177	Pepsico1_Contig3716.path1
TRINITY_DN15375_c0_g1_i2.path1	Pepsico2_Contig20185.path1	TRINITY_DN16509_c1_g1_i2.path2	TRINITY_DN2_c0_g1_i2.path2
TRINITY_DN24907_c0_g2_i1.path1	Pepsico1_Contig26.path1	Pepsico2_Contig17149.path1	Pepsico2_Contig6260.path2
novel.2119	novel.206	TRINITY_DN22698_c0_g1_i1.path1	TRINITY_DN10826_c0_g1_i2.path1
Pepsico2_Contig16903.path1	novel.2297	Pepsico2_Contig3832.path2	Pepsico2_Contig10328.path1
TRINITY_DN50814_c0_g1_i6.path1	TRINITY_DN13991_c0_g2_i3.path1	TRINITY_DN15654_c1_g3_i1.path1	TRINITY_DN67035_c0_g1_i1.path1
TRINITY_DN20219_c0_g1_i9.path3	TRINITY_DN2737_c0_g1_i10.path1	Pepsico2_Contig19412.path1	TRINITY_DN29788_c0_g1_i1.path1
TRINITY_DN52375_c0_g1_i2.path1	TRINITY_DN45039_c0_g1_i1.path1	TRINITY_DN1968_c0_g1_i4.path1	Pepsico2_Contig3315.path1
TRINITY_DN40458_c0_g1_i6.path1	Pepsico1_Contig2142.path1	TRINITY_DN22733_c1_g1_i3.path1	TRINITY_DN10815_c0_g2_i1.path1
novel.3831	Pepsico1_Contig557.path1	novel.8941	Pepsico2_Contig2718.path1
novel.4182	Pepsico1_Contig2405.path1	TRINITY_DN18179_c0_g2_i1.path2	TRINITY_DN30653_c0_g1_i1.path1
TRINITY_DN3431_c0_g1_i1.path1	TRINITY_DN24342_c0_g2_i1.path1	TRINITY_DN7830_c0_g2_i1.path1	novel.10237
Pepsico2_Contig15475.path2	TRINITY_DN18694_c0_g1_i1.path1	Pepsico1_Contig7174.path1	TRINITY_DN4606_c0_g2_i1.path1
TRINITY_DN100353_c0_g1_i1.path1	TRINITY_DN30601_c0_g1_i1.path1	TRINITY_DN21706_c0_g1_i3.path1	TRINITY_DN966_c0_g2_i3.path1
TRINITY_DN58092_c0_g1_i1.path2	novel.7197	TRINITY_DN15613_c0_g1_i3.path3	Pepsico1_Contig2787.path1
TRINITY_DN8322_c0_g1_i1.path1	TRINITY_DN16543_c0_g2_i1.path1	novel.1165	TRINITY_DN20691_c0_g1_i1.path1
TRINITY_DN72136_c0_g1_i1.path1	TRINITY_DN18366_c0_g1_i1.path2	TRINITY_DN7216_c1_g2_i1.path1	TRINITY_DN108097_c0_g1_i1.path1
novel.2170	TRINITY_DN3659_c2_g1_i1.path4	novel.4694	TRINITY_DN50091_c1_g1_i1.path1
Pepsico2_Contig3011.path2	TRINITY_DN7216_c1_g2_i1.path1	novel.1686	TRINITY_DN23137_c0_g1_i1.path2
TRINITY_DN530_c0_g1_i3.path1	Pepsico1_Contig3669.path1	Pepsico2_Contig11083.path1	TRINITY_DN13776_c0_g1_i3.path1
TRINITY_DN22503_c0_g1_i1.path1	novel.3049	TRINITY_DN3543_c0_g1_i5.path1	novel.2368
TRINITY_DN57594_c0_g1_i1.path1	TRINITY_DN36731_c0_g1_i1.path1	TRINITY_DN10277_c0_g1_i1.path1	Pepsico1_Contig346.path1
TRINITY_DN8914_c0_g2_i4.path2	Pepsico2_Contig18670.path1	Pepsico2_Contig13161.path1	novel.3955
TRINITY_DN40802_c0_g2_i2.path1	TRINITY_DN32638_c0_g1_i1.path1	novel.7403	novel.3116
novel.4703	TRINITY_DN50091_c1_g1_i1.path1	TRINITY_DN11954_c0_g1_i6.path1	TRINITY_DN25887_c0_g1_i1.path1
Pepsico2_Contig8810.path1	novel.1447	TRINITY_DN47629_c0_g1_i1.path1	TRINITY_DN5876_c0_g3_i1.path1
TRINITY_DN36154_c1_g1_i1.path1	TRINITY_DN19087_c0_g1_i3.path1	novel.1114	TRINITY_DN3225_c1_g1_i1.path1
novel.6520	TRINITY_DN23579_c0_g1_i1.path1	TRINITY_DN40927_c0_g1_i3.path1	TRINITY_DN571_c0_g2_i1.path1
novel.5005	Pepsico2_Contig14315.path1	novel.7010	TRINITY_DN60938_c0_g1_i1.path1
Pepsico2_Contig16922.path1	TRINITY_DN29329_c0_g2_i1.path1	TRINITY_DN26771_c0_g1_i1.path1	Pepsico1_Contig526.path1
Pepsico2_Contig8203.path1	novel.7060	TRINITY_DN114404_c0_g1_i1.path1	Pepsico2_Contig7935.path1
Pepsico1_Contig2899.path2	TRINITY_DN35487_c0_g1_i2.path1	TRINITY_DN44824_c0_g1_i1.path5	Pepsico2_Contig12649.path1
Pepsico1_Contig6100.path1	TRINITY_DN5144_c0_g1_i8.path2	Pepsico1_Contig47.path2	Pepsico2_Contig6839.path1
Pepsico2_Contig3516.path1	TRINITY_DN74489_c0_g1_i1.path1	TRINITY_DN11076_c0_g1_i1.path2	TRINITY_DN96191_c0_g1_i1.path1
TRINITY_DN14414_c0_g2_i1.path1	Pepsico2_Contig5687.path1	TRINITY_DN85820_c0_g1_i1.path1	Pepsico2_Contig17986.path1
Pepsico2_Contig3750.path2	TRINITY_DN19392_c0_g2_i1.path1	novel.2564	TRINITY_DN100548_c0_g1_i1.path1
TRINITY_DN24473_c0_g1_i1.path1	TRINITY_DN52884_c0_g1_i1.path1	TRINITY_DN13022_c0_g1_i1.path1	Pepsico2_Contig12784.path1
TRINITY_DN18350_c0_g1_i4.path1	Pepsico1_Contig26918.path1	TRINITY_DN1139_c0_g1_i1.path1	novel.8437
TRINITY_DN97554_c0_g1_i1.path1	novel.8683	novel.8901	Pepsico2_Contig19649.path3
Pepsico2_Contig13792.path1	TRINITY_DN19340_c0_g1_i5.path2	novel.8628	Pepsico2_Contig8092.path1
TRINITY_DN31633_c1_g1_i4.path1	Pepsico2_Contig7794.path1	TRINITY_DN21931_c0_g1_i2.path1	TRINITY_DN59339_c0_g1_i2.path1
novel.5050	novel.2707	novel.2619	TRINITY_DN62636_c0_g1_i1.path1
Pepsico2_Contig18254.path2	TRINITY_DN4734_c0_g1_i5.path2	TRINITY_DN685_c1_g2_i1.path2	TRINITY_DN11112_c0_g1_i3.path1
novel.8576	TRINITY_DN24768_c0_g2_i1.path2	TRINITY_DN108772_c0_g1_i1.path1	novel.3405
TRINITY_DN4139_c0_g1_i1.path1	TRINITY_DN10842_c0_g1_i1.path2	TRINITY_DN30113_c0_g1_i1.path1	TRINITY_DN18168_c0_g1_i2.path1
TRINITY_DN26399_c0_g1_i2.path1	TRINITY_DN13645_c0_g2_i1.path2	novel.10231	Pepsico2_Contig12476.path1
novel.1863	TRINITY_DN30131_c0_g1_i2.path1	novel.857	TRINITY_DN19573_c0_g1_i1.path1
Pepsico2_Contig17272.path1	TRINITY_DN6989_c0_g1_i1.path1	TRINITY_DN1766_c0_g2_i2.path1	novel.9623
TRINITY_DN80688_c0_g1_i1.path1	Pepsico1_Contig1823.path1	TRINITY_DN11167_c2_g1_i1.path1	TRINITY_DN33361_c0_g1_i5.path2
Pepsico1_Contig526.path2	Pepsico1_Contig71.path1	TRINITY_DN25872_c0_g1_i1.path2	novel.7369
TRINITY_DN61440_c0_g1_i1.path1	TRINITY_DN1148_c0_g1_i2.path1	Pepsico2_Contig8136.path1	novel.1427
novel.5772	TRINITY_DN10242_c0_g1_i5.path2	novel.2742	Pepsico2_Contig17305.path4
TRINITY_DN12913_c0_g1_i2.path1	Pepsico2_Contig11017.path2	novel.7060	Pepsico2_Contig9412.path1
novel.3356	novel.280	TRINITY_DN245_c0_g2_i1.path1	TRINITY_DN10015_c0_g1_i1.path3
Pepsico2_Contig2358.path1	TRINITY_DN84840_c0_g1_i1.path1	novel.1138	novel.7720
TRINITY_DN91037_c0_g1_i1.path1	TRINITY_DN76151_c0_g1_i1.path1	Pepsico2_Contig5996.path2	TRINITY_DN10907_c0_g2_i2.path1
Pepsico1_Contig28191.path1	TRINITY_DN15282_c0_g1_i1.path1	Pepsico1_Contig1806.path2	TRINITY_DN6929_c1_g1_i4.path1
TRINITY_DN106999_c0_g1_i1.path3	TRINITY_DN9225_c0_g1_i1.path1	Pepsico1_Contig92.path1	TRINITY_DN65056_c0_g1_i1.path1
TRINITY_DN13364_c0_g1_i3.path1	TRINITY_DN9040_c0_g1_i1.path1	novel.5189	novel.7276
TRINITY_DN158_c0_g1_i1.path1	TRINITY_DN22824_c0_g1_i2.path1	TRINITY_DN7691_c1_g2_i1.path1	Pepsico2_Contig16657.path3
TRINITY_DN19162_c0_g1_i3.path1	novel.2921	TRINITY_DN30875_c0_g1_i1.path1	TRINITY_DN4894_c0_g1_i1.path2
TRINITY_DN13315_c0_g1_i3.path1	Pepsico1_Contig3469.path1	TRINITY_DN24065_c0_g1_i1.path1	TRINITY_DN99485_c0_g1_i1.path1
TRINITY_DN51761_c3_g2_i3.path1	TRINITY_DN99713_c0_g1_i1.path1	novel.8523	TRINITY_DN17176_c0_g1_i6.path1
TRINITY_DN57958_c0_g1_i1.path1	Pepsico2_Contig3317.path1	Pepsico1_Contig32727.path1	TRINITY_DN21493_c0_g1_i1.path1
Pepsico1_Contig39106.path1	TRINITY_DN2377_c0_g1_i1.path1	TRINITY_DN10873_c0_g2_i1.path1	novel.4211
TRINITY_DN27605_c0_g1_i2.path1	novel.9668	TRINITY_DN18491_c0_g1_i3.path1	TRINITY_DN17775_c0_g2_i1.path1
novel.5801	TRINITY_DN14495_c0_g1_i2.path1	TRINITY_DN5876_c0_g2_i1.path1	Pepsico1_Contig4939.path2
TRINITY_DN1006_c0_g1_i7.path1	novel.5601	TRINITY_DN27605_c0_g1_i2.path1	TRINITY_DN11586_c0_g2_i3.path1
Pepsico1_Contig3446.path2	TRINITY_DN17474_c0_g2_i1.path1	Pepsico2_Contig15361.path2	novel.4365
TRINITY_DN15867_c0_g1_i5.path1	TRINITY_DN15455_c0_g1_i7.path2	Pepsico2_Contig16525.path1	Pepsico2_Contig19854.path2
Pepsico2_Contig19101.path2	Pepsico2_Contig11035.path1	TRINITY_DN18095_c0_g1_i1.path1	TRINITY_DN36259_c0_g1_i1.path1
Pepsico2_Contig20237.path1	novel.6686	TRINITY_DN22464_c0_g1_i3.path1	TRINITY_DN18642_c0_g1_i4.path1
TRINITY_DN36697_c0_g1_i1.path1	TRINITY_DN36021_c0_g1_i1.path1	TRINITY_DN9612_c0_g1_i1.path2	TRINITY_DN49656_c0_g1_i1.path1
novel.7522	Pepsico2_Contig13889.path2	novel.3837	Pepsico2_Contig7794.path1
TRINITY_DN15448_c0_g1_i2.path1	Pepsico2_Contig19613.path1	novel.1374	TRINITY_DN20528_c0_g1_i1.path1
Pepsico2_Contig17169.path1	Pepsico2_Contig6539.path1	novel.6691	TRINITY_DN9573_c0_g1_i7.path1
Pepsico1_Contig598.path1	Pepsico2_Contig11083.path1	TRINITY_DN10620_c0_g1_i4.path1	TRINITY_DN25287_c0_g3_i1.path1
TRINITY_DN78505_c0_g1_i1.path1	novel.5625	Pepsico2_Contig14670.path1	novel.335
TRINITY_DN71768_c0_g1_i1.path1	novel.8801	TRINITY_DN34220_c0_g1_i1.path2	novel.3990
TRINITY_DN6116_c0_g2_i2.path1	TRINITY_DN4975_c0_g1_i3.path2	TRINITY_DN25120_c0_g1_i1.path1	TRINITY_DN6909_c0_g1_i6.path2
TRINITY_DN91067_c0_g1_i1.path2	TRINITY_DN22038_c0_g1_i2.path1	TRINITY_DN32087_c0_g1_i1.path1	Pepsico2_Contig1445.path1
TRINITY_DN20750_c0_g1_i1.path1	Pepsico2_Contig11378.path1	novel.232	TRINITY_DN89953_c0_g1_i1.path1
TRINITY_DN24018_c0_g1_i7.path1	novel.4940	novel.6158	novel.6846
TRINITY_DN33948_c0_g1_i1.path1	TRINITY_DN24347_c0_g1_i2.path1	Pepsico2_Contig19452.path1	TRINITY_DN55287_c0_g1_i1.path4
TRINITY_DN30187_c0_g1_i1.path1	novel.3848	TRINITY_DN1827_c0_g2_i1.path1	TRINITY_DN10194_c0_g1_i1.path1
TRINITY_DN22019_c0_g1_i3.path1	novel.3405	TRINITY_DN102507_c0_g1_i1.path1	TRINITY_DN36019_c1_g1_i1.path1
Pepsico2_Contig17815.path1	TRINITY_DN10605_c0_g1_i2.path1	TRINITY_DN9857_c0_g2_i1.path1	TRINITY_DN18326_c0_g1_i2.path1
novel.9187	Pepsico2_Contig17718.path1	novel.5145	TRINITY_DN9612_c0_g1_i1.path2
novel.1420	TRINITY_DN36941_c0_g1_i1.path1	Pepsico2_Contig11017.path1	TRINITY_DN26200_c0_g1_i1.path1
TRINITY_DN7356_c0_g1_i8.path1	novel.3878	novel.6785	TRINITY_DN8648_c0_g1_i4.path2
TRINITY_DN52615_c0_g1_i1.path1	novel.10141	TRINITY_DN30131_c0_g1_i2.path1	TRINITY_DN66437_c0_g1_i1.path1
Pepsico2_Contig10642.path2	Pepsico2_Contig14071.path2	novel.8191	TRINITY_DN22791_c0_g2_i1.path1
novel.1803	novel.4987	Pepsico2_Contig17550.path2	TRINITY_DN10873_c0_g2_i1.path1
TRINITY_DN68988_c0_g1_i1.path2	Pepsico2_Contig7831.path1	TRINITY_DN2450_c1_g2_i1.path1	Pepsico2_Contig19669.path1
TRINITY_DN5319_c0_g1_i1.path1	Pepsico1_Contig1413.path1	TRINITY_DN4_c0_g1_i6.path1	TRINITY_DN53169_c0_g1_i1.path2
TRINITY_DN16818_c0_g3_i1.path1	TRINITY_DN15545_c0_g2_i1.path1	TRINITY_DN22584_c0_g2_i1.path1	TRINITY_DN31413_c0_g1_i4.path1
novel.8052	novel.3090	novel.4044	TRINITY_DN5135_c0_g1_i1.path2
Pepsico2_Contig4435.path1	novel.2367	novel.603	Pepsico1_Contig12096.path2
TRINITY_DN34005_c0_g1_i1.path1	TRINITY_DN21706_c0_g2_i1.path1	TRINITY_DN18199_c0_g1_i1.path2	TRINITY_DN21231_c0_g1_i3.path2
novel.1563	Pepsico1_Contig165.path1	TRINITY_DN4204_c0_g1_i1.path1	TRINITY_DN11724_c0_g1_i4.path2
TRINITY_DN37816_c0_g1_i1.path1	TRINITY_DN15198_c0_g1_i2.path2	TRINITY_DN4491_c1_g1_i6.path1	TRINITY_DN15593_c0_g1_i1.path1
Pepsico2_Contig6772.path1	TRINITY_DN11600_c0_g1_i1.path1	TRINITY_DN2567_c0_g1_i1.path3	TRINITY_DN9923_c0_g1_i1.path1
TRINITY_DN68305_c0_g1_i1.path1	TRINITY_DN36164_c0_g1_i1.path1	TRINITY_DN15642_c0_g1_i4.path1	novel.8296
novel.3012	novel.6761	TRINITY_DN21346_c0_g1_i2.path1	Pepsico2_Contig2646.path1
novel.4370	TRINITY_DN3739_c0_g1_i2.path1	novel.10203	TRINITY_DN14241_c0_g1_i1.path1
novel.587	TRINITY_DN14779_c0_g2_i1.path1	TRINITY_DN15905_c1_g1_i1.path2	TRINITY_DN21016_c0_g1_i1.path1
Pepsico1_Contig36.path1	novel.2030	TRINITY_DN107367_c0_g1_i1.path1	Pepsico2_Contig18089.path1
TRINITY_DN6846_c0_g2_i1.path1	Pepsico2_Contig20569.path3	TRINITY_DN38122_c0_g1_i1.path1	TRINITY_DN65040_c0_g1_i1.path1
Pepsico2_Contig13844.path1	Pepsico2_Contig9051.path1	TRINITY_DN7264_c0_g1_i3.path1	TRINITY_DN3262_c0_g1_i4.path1
Pepsico2_Contig884.path1	TRINITY_DN44824_c0_g1_i1.path5	TRINITY_DN91660_c0_g1_i1.path1	TRINITY_DN34252_c0_g1_i1.path1
Pepsico1_Contig23779.path2	Pepsico2_Contig243.path1	Pepsico2_Contig12957.path1	novel.8212
TRINITY_DN37157_c0_g1_i1.path1	TRINITY_DN10451_c0_g1_i2.path2	TRINITY_DN2850_c0_g3_i1.path1	TRINITY_DN14937_c0_g1_i2.path2
Pepsico2_Contig12158.path2	novel.10221	TRINITY_DN8516_c0_g1_i1.path1	Pepsico2_Contig1581.path1
TRINITY_DN16543_c0_g1_i1.path2	TRINITY_DN37672_c0_g1_i1.path1	TRINITY_DN13108_c0_g1_i1.path2	TRINITY_DN21860_c0_g3_i2.path1
TRINITY_DN7824_c0_g1_i1.path2	TRINITY_DN17139_c0_g1_i1.path1	TRINITY_DN56186_c0_g1_i1.path1	Pepsico1_Contig4438.path1
novel.3259	TRINITY_DN61247_c0_g1_i1.path1	Pepsico1_Contig843.path1	TRINITY_DN12929_c0_g1_i1.path2
novel.1805	TRINITY_DN6562_c0_g1_i5.path3	TRINITY_DN24336_c0_g1_i1.path1	novel.10107
Pepsico2_Contig5193.path2	TRINITY_DN101134_c0_g1_i1.path1	Pepsico1_Contig5244.path1	TRINITY_DN7172_c1_g1_i6.path1
novel.2018	novel.6633	TRINITY_DN11181_c0_g1_i3.path1	novel.7249
TRINITY_DN24444_c0_g1_i1.path1	novel.1514	Pepsico2_Contig7855.path1	novel.7595
TRINITY_DN35311_c0_g2_i1.path1	novel.1412	novel.8492	Pepsico2_Contig8757.path1
Pepsico2_Contig16919.path1	TRINITY_DN17358_c1_g2_i4.path1	TRINITY_DN24567_c0_g1_i1.path1	novel.8517
TRINITY_DN53024_c0_g1_i1.path1	Pepsico2_Contig15185.path1	TRINITY_DN10907_c0_g2_i2.path1	TRINITY_DN30388_c0_g1_i1.path1
TRINITY_DN41325_c1_g1_i1.path1	novel.4993	Pepsico1_Contig130.path1	novel.1489
Pepsico2_Contig8726.path1	TRINITY_DN4506_c0_g1_i2.path1	TRINITY_DN112669_c0_g1_i1.path1	Pepsico2_Contig3282.path2
TRINITY_DN31204_c0_g2_i1.path2	novel.9838	Pepsico1_Contig37385.path2	TRINITY_DN4_c0_g1_i6.path1
TRINITY_DN72019_c0_g1_i1.path1	TRINITY_DN3262_c0_g1_i4.path1	novel.9668	Pepsico1_Contig2334.path1
novel.7704	novel.7051	Pepsico2_Contig3750.path1	TRINITY_DN24121_c0_g1_i1.path1
TRINITY_DN31076_c0_g1_i4.path2	TRINITY_DN30562_c0_g1_i1.path1	Pepsico1_Contig1620.path2	TRINITY_DN24281_c0_g1_i3.path1
TRINITY_DN14532_c0_g1_i1.path3	Pepsico2_Contig13838.path2	novel.4299	TRINITY_DN6909_c0_g1_i6.path1
TRINITY_DN15105_c0_g1_i6.path1	novel.259	TRINITY_DN13991_c1_g1_i1.path1	TRINITY_DN19018_c0_g1_i1.path2
novel.8826	Pepsico2_Contig12694.path1	novel.4107	novel.2828
TRINITY_DN103531_c0_g1_i1.path1	novel.1441	TRINITY_DN35060_c1_g1_i1.path1	Pepsico1_Contig3923.path1
TRINITY_DN65337_c0_g1_i1.path1	TRINITY_DN56274_c0_g1_i1.path1	TRINITY_DN12947_c0_g1_i4.path1	TRINITY_DN38775_c0_g1_i1.path1
Pepsico2_Contig4663.path1	TRINITY_DN17398_c0_g2_i3.path1	TRINITY_DN24768_c0_g2_i1.path2	novel.6101
TRINITY_DN7145_c0_g1_i6.path1	TRINITY_DN90023_c0_g1_i1.path1	Pepsico2_Contig9084.path1	TRINITY_DN16150_c0_g1_i1.path2
TRINITY_DN3106_c0_g2_i1.path1	TRINITY_DN55806_c0_g1_i1.path2	TRINITY_DN4515_c0_g1_i17.path3	Pepsico2_Contig2625.path1
TRINITY_DN2067_c0_g1_i1.path1	TRINITY_DN5591_c0_g1_i3.path2	novel.1301	Pepsico2_Contig12461.path1
TRINITY_DN21329_c0_g1_i1.path1	TRINITY_DN12548_c0_g1_i3.path2	novel.1453	TRINITY_DN1605_c0_g2_i3.path1
novel.6250	TRINITY_DN23712_c0_g3_i1.path1	novel.650	Pepsico2_Contig8201.path1
TRINITY_DN113020_c0_g1_i1.path2	TRINITY_DN28234_c1_g1_i1.path1	TRINITY_DN40416_c0_g1_i1.path3	Pepsico2_Contig11065.path1
Pepsico2_Contig503.path1	TRINITY_DN100271_c0_g1_i1.path1	novel.8998	TRINITY_DN17168_c1_g1_i2.path1
TRINITY_DN9047_c2_g3_i1.path1	TRINITY_DN9573_c0_g1_i7.path1	TRINITY_DN14356_c1_g1_i10.path2	TRINITY_DN2210_c0_g1_i2.path1
TRINITY_DN39348_c0_g1_i1.path2	TRINITY_DN24316_c0_g2_i1.path2	TRINITY_DN103453_c0_g1_i1.path1	novel.9957
Pepsico2_Contig14542.path1	novel.8586	TRINITY_DN11302_c0_g1_i3.path1	TRINITY_DN29640_c0_g3_i1.path1
TRINITY_DN6533_c1_g3_i1.path2	Pepsico2_Contig836.path1	Pepsico1_Contig125.path2	novel.2343
Pepsico2_Contig4818.path1	Pepsico2_Contig7603.path1	TRINITY_DN17775_c0_g2_i1.path1	TRINITY_DN5235_c0_g2_i1.path1
TRINITY_DN22560_c0_g1_i4.path1	Pepsico1_Contig1029.path2	novel.6524	TRINITY_DN17072_c0_g1_i4.path2
TRINITY_DN14700_c0_g1_i2.path1	TRINITY_DN55852_c0_g1_i1.path1	novel.7276	TRINITY_DN23140_c0_g1_i1.path1
TRINITY_DN45694_c0_g1_i2.path1	novel.8551	Pepsico2_Contig3519.path1	novel.1213
TRINITY_DN34178_c0_g1_i1.path1	TRINITY_DN7096_c0_g3_i1.path1	TRINITY_DN15455_c0_g1_i7.path3	novel.3956
Pepsico2_Contig9051.path1	Pepsico2_Contig1718.path1	TRINITY_DN11047_c0_g1_i1.path1	TRINITY_DN18348_c1_g1_i1.path1
TRINITY_DN9047_c2_g2_i1.path1	novel.4610	TRINITY_DN13202_c0_g1_i2.path1	TRINITY_DN39737_c0_g1_i1.path1
TRINITY_DN70133_c0_g1_i1.path1	Pepsico1_Contig3406.path1	TRINITY_DN42158_c0_g1_i1.path1	Pepsico1_Contig921.path2
Pepsico2_Contig17023.path1	Pepsico1_Contig7922.path1	TRINITY_DN14174_c0_g3_i1.path1	Pepsico2_Contig6611.path4
TRINITY_DN1295_c1_g1_i1.path1	TRINITY_DN83901_c0_g1_i1.path1	TRINITY_DN7691_c0_g5_i1.path1	novel.1981
Pepsico2_Contig14645.path1	TRINITY_DN106898_c0_g1_i1.path1	TRINITY_DN13000_c0_g2_i2.path1	novel.9668
TRINITY_DN91140_c0_g1_i1.path1	TRINITY_DN21247_c0_g1_i2.path1	Pepsico1_Contig2488.path2	TRINITY_DN18642_c0_g1_i4.path2
novel.9159	TRINITY_DN29954_c0_g1_i1.path1	TRINITY_DN42762_c0_g1_i1.path3	novel.2684
Pepsico2_Contig2103.path1	TRINITY_DN2565_c0_g2_i3.path1	TRINITY_DN94140_c0_g1_i1.path2	TRINITY_DN19084_c0_g1_i4.path1
Pepsico2_Contig781.path1	novel.8359	TRINITY_DN24444_c0_g1_i1.path1	TRINITY_DN91483_c0_g1_i1.path1
TRINITY_DN2098_c1_g1_i5.path1	TRINITY_DN33625_c0_g1_i1.path1	novel.1320	novel.8600
novel.5420	novel.1640	TRINITY_DN23705_c0_g2_i2.path1	Pepsico2_Contig1002.path1
Pepsico2_Contig16947.path2	TRINITY_DN83476_c0_g1_i1.path1	novel.9368	TRINITY_DN21343_c0_g1_i4.path1
TRINITY_DN9952_c0_g1_i1.path1	Pepsico2_Contig2988.path1	TRINITY_DN3104_c1_g2_i1.path1	novel.5375
novel.2871	TRINITY_DN106494_c0_g1_i1.path1	novel.5375	novel.3804
novel.3460	TRINITY_DN23428_c0_g1_i1.path1	TRINITY_DN32075_c0_g5_i3.path1	TRINITY_DN3543_c1_g1_i4.path1
novel.4843	novel.2011	Pepsico2_Contig4698.path1	TRINITY_DN39335_c0_g1_i1.path1
novel.769	TRINITY_DN6365_c0_g1_i3.path1	TRINITY_DN14625_c0_g2_i1.path1	TRINITY_DN102914_c0_g1_i1.path1
Pepsico2_Contig3465.path1	Pepsico1_Contig9405.path1	novel.10120	Pepsico2_Contig17288.path1
novel.5933	TRINITY_DN41201_c0_g2_i1.path2	novel.3049	TRINITY_DN14383_c0_g2_i2.path1
TRINITY_DN7075_c0_g1_i5.path1	TRINITY_DN31093_c0_g2_i2.path1	TRINITY_DN41963_c0_g2_i1.path1	Pepsico2_Contig367.path1
Pepsico2_Contig19541.path1	novel.2296	novel.9279	TRINITY_DN11920_c1_g2_i1.path1
TRINITY_DN109183_c0_g1_i1.path1	Pepsico2_Contig9047.path2	TRINITY_DN11548_c0_g1_i5.path1	novel.9671
TRINITY_DN37783_c3_g1_i1.path1	TRINITY_DN28019_c0_g1_i9.path1	Pepsico2_Contig10648.path1	novel.2055
TRINITY_DN574_c0_g1_i1.path1	TRINITY_DN1454_c0_g1_i1.path1	novel.6264	novel.682
TRINITY_DN70268_c0_g1_i1.path2	novel.603	TRINITY_DN8122_c0_g1_i5.path1	novel.2620
TRINITY_DN52160_c0_g1_i1.path1	Pepsico2_Contig4717.path1	novel.4932	TRINITY_DN7653_c0_g2_i2.path1
TRINITY_DN12550_c0_g1_i1.path1	TRINITY_DN15916_c0_g1_i1.path1	TRINITY_DN8283_c0_g1_i1.path2	novel.4885
TRINITY_DN16904_c3_g1_i1.path1	Pepsico2_Contig17000.path1	novel.2086	Pepsico2_Contig11033.path1
TRINITY_DN35640_c0_g4_i1.path1	TRINITY_DN76465_c0_g1_i1.path1	novel.7228	Pepsico2_Contig20778.path1
Pepsico2_Contig18357.path1	TRINITY_DN22103_c0_g1_i1.path1	TRINITY_DN87900_c0_g1_i1.path1	TRINITY_DN13609_c0_g1_i3.path1
Pepsico1_Contig1860.path1	TRINITY_DN69283_c0_g1_i1.path1	TRINITY_DN34756_c0_g1_i5.path1	TRINITY_DN21357_c0_g1_i1.path1
TRINITY_DN25014_c1_g2_i1.path1	Pepsico2_Contig20384.path1	TRINITY_DN32451_c0_g1_i2.path3	Pepsico2_Contig3132.path1
novel.1469	TRINITY_DN1139_c0_g1_i1.path1	novel.8723	TRINITY_DN18844_c0_g1_i1.path1
Pepsico2_Contig5219.path1	TRINITY_DN85368_c0_g1_i1.path1	novel.2620	Pepsico1_Contig4750.path1
TRINITY_DN13237_c0_g1_i10.path1	TRINITY_DN37508_c0_g1_i2.path1	Pepsico2_Contig18121.path1	TRINITY_DN21996_c0_g1_i1.path1
TRINITY_DN34430_c0_g2_i1.path1	TRINITY_DN12705_c1_g1_i3.path2	novel.4947	TRINITY_DN22219_c0_g1_i1.path1
TRINITY_DN21515_c0_g1_i1.path1	Pepsico2_Contig12598.path1	TRINITY_DN26262_c0_g1_i1.path1	Pepsico2_Contig4586.path1
novel.8816	TRINITY_DN43775_c0_g1_i1.path2	TRINITY_DN11470_c0_g1_i1.path1	TRINITY_DN57099_c0_g1_i2.path1
TRINITY_DN85858_c0_g1_i1.path1	TRINITY_DN94904_c0_g1_i1.path1	Pepsico2_Contig1496.path1	novel.6580
novel.4989	TRINITY_DN10806_c0_g1_i1.path2	novel.1076	novel.503
novel.3344	novel.2055	novel.5601	TRINITY_DN19946_c0_g1_i1.path1
TRINITY_DN22649_c0_g1_i1.path2	Pepsico2_Contig13090.path1	TRINITY_DN12836_c0_g1_i3.path1	novel.7507
TRINITY_DN92912_c0_g1_i1.path1	TRINITY_DN16376_c0_g1_i2.path1	Pepsico2_Contig12375.path1	novel.8133
novel.5737	TRINITY_DN293_c0_g1_i3.path1	Pepsico2_Contig7514.path1	novel.9607
Pepsico1_Contig47.path2	TRINITY_DN16002_c0_g1_i1.path1	TRINITY_DN4714_c0_g1_i9.path1	Pepsico2_Contig1759.path2
TRINITY_DN53627_c0_g2_i2.path1	TRINITY_DN15500_c0_g3_i1.path2	Pepsico2_Contig31.path1	TRINITY_DN34766_c0_g1_i6.path1
TRINITY_DN66260_c0_g1_i1.path1	novel.3595	TRINITY_DN53857_c0_g1_i1.path1	TRINITY_DN9040_c0_g1_i1.path1
TRINITY_DN9669_c0_g1_i1.path1	TRINITY_DN1120_c0_g2_i4.path1	TRINITY_DN18292_c0_g3_i1.path1	TRINITY_DN11282_c2_g1_i1.path1
Pepsico2_Contig19795.path1	TRINITY_DN6470_c2_g1_i3.path1	TRINITY_DN102485_c0_g1_i1.path1	Pepsico1_Contig22407.path1
novel.5820	TRINITY_DN58060_c0_g1_i1.path1	Pepsico2_Contig7984.path2	TRINITY_DN30463_c0_g1_i1.path1
TRINITY_DN61653_c0_g1_i2.path1	novel.1495	Pepsico1_Contig2631.path1	TRINITY_DN109792_c0_g1_i1.path1
TRINITY_DN14268_c0_g1_i3.path1	novel.125	TRINITY_DN21711_c0_g1_i1.path2	TRINITY_DN87_c0_g1_i1.path2
novel.8879	TRINITY_DN39236_c0_g1_i1.path1	TRINITY_DN8094_c0_g1_i2.path1	TRINITY_DN80803_c0_g1_i1.path1
novel.4358	TRINITY_DN18117_c0_g1_i3.path3	Pepsico2_Contig20155.path1	TRINITY_DN5970_c2_g1_i1.path1
TRINITY_DN103518_c0_g1_i1.path1	TRINITY_DN5939_c0_g3_i1.path1	TRINITY_DN29949_c4_g1_i1.path1	TRINITY_DN21593_c1_g1_i1.path1
novel.3684	TRINITY_DN11920_c0_g1_i2.path1	TRINITY_DN12951_c0_g1_i1.path1	novel.9973
Pepsico1_Contig4800.path2	Pepsico1_Contig47.path2	novel.9093	TRINITY_DN108802_c0_g1_i1.path1
Pepsico1_Contig2787.path1	novel.9281	TRINITY_DN40757_c0_g1_i2.path1	TRINITY_DN431_c0_g1_i7.path2
TRINITY_DN58721_c0_g1_i1.path2	novel.6923	novel.2442	novel.5378
TRINITY_DN15613_c0_g1_i3.path2	Pepsico2_Contig15057.path1	TRINITY_DN18692_c2_g1_i1.path1	TRINITY_DN21711_c0_g1_i1.path1
TRINITY_DN15625_c0_g1_i3.path1	TRINITY_DN7411_c0_g1_i2.path1	Pepsico1_Contig1941.path1	novel.5839
TRINITY_DN17722_c0_g1_i1.path1	novel.1912	Pepsico2_Contig9720.path2	TRINITY_DN11760_c0_g1_i2.path1
TRINITY_DN26430_c0_g1_i2.path1	TRINITY_DN7872_c0_g4_i1.path1	TRINITY_DN56076_c0_g1_i1.path1	TRINITY_DN20603_c1_g1_i1.path1
TRINITY_DN6572_c0_g1_i5.path2	novel.3233	novel.5499	TRINITY_DN16114_c0_g1_i3.path1
TRINITY_DN76827_c0_g1_i1.path1	Pepsico2_Contig3476.path1	TRINITY_DN52988_c0_g1_i1.path1	TRINITY_DN19031_c0_g2_i1.path1
TRINITY_DN62263_c0_g1_i1.path1	TRINITY_DN34855_c0_g1_i14.path2	TRINITY_DN31074_c0_g1_i2.path2	novel.4299
Pepsico1_Contig27172.path2	novel.1745	novel.2360	TRINITY_DN8830_c0_g1_i19.path3
Pepsico2_Contig3071.path2	TRINITY_DN158_c0_g1_i1.path1	TRINITY_DN61247_c0_g1_i1.path1	novel.6796
TRINITY_DN9204_c0_g2_i4.path1	TRINITY_DN26039_c0_g1_i1.path1	novel.5033	TRINITY_DN55806_c0_g1_i1.path2
Pepsico2_Contig6537.path1	TRINITY_DN8715_c0_g1_i2.path2	TRINITY_DN15251_c0_g1_i1.path2	Pepsico1_Contig4996.path1
TRINITY_DN28715_c0_g1_i1.path1	novel.7680	TRINITY_DN8509_c0_g1_i3.path1	TRINITY_DN19732_c1_g1_i2.path2
TRINITY_DN3567_c0_g2_i2.path1	novel.7998	TRINITY_DN26083_c0_g1_i3.path1	Pepsico2_Contig19452.path1
Pepsico2_Contig132.path1	Pepsico2_Contig3537.path2	TRINITY_DN320_c2_g1_i1.path2	novel.2601
TRINITY_DN13035_c0_g1_i13.path1	novel.1768	TRINITY_DN18140_c1_g1_i1.path2	novel.4643
novel.3859	Pepsico2_Contig7448.path1	novel.6946	Pepsico2_Contig18864.path1
TRINITY_DN92395_c0_g1_i1.path1	Pepsico2_Contig5219.path1	Pepsico1_Contig1891.path1	TRINITY_DN55287_c0_g1_i1.path2
TRINITY_DN24481_c0_g1_i3.path1	novel.7610	TRINITY_DN582_c2_g1_i6.path3	TRINITY_DN11470_c0_g1_i1.path1
novel.9496	TRINITY_DN9209_c0_g1_i7.path1	Pepsico2_Contig20608.path1	novel.7111
TRINITY_DN16716_c0_g1_i4.path1	TRINITY_DN70511_c0_g1_i1.path1	Pepsico1_Contig107.path1	TRINITY_DN14264_c0_g2_i4.path3
TRINITY_DN13880_c0_g1_i5.path1	TRINITY_DN10035_c0_g1_i1.path1	novel.7371	TRINITY_DN52884_c0_g1_i1.path1
TRINITY_DN18448_c0_g1_i2.path2	TRINITY_DN7521_c0_g1_i1.path2	novel.1448	TRINITY_DN65824_c0_g1_i1.path1
novel.5605	Pepsico2_Contig12882.path1	novel.6897	novel.4480
TRINITY_DN47629_c0_g1_i1.path1	novel.1301	TRINITY_DN71990_c0_g1_i1.path1	novel.51
novel.5457	TRINITY_DN6057_c0_g1_i2.path1	TRINITY_DN89378_c0_g1_i1.path1	TRINITY_DN69825_c0_g1_i1.path1
TRINITY_DN12818_c0_g1_i5.path1	TRINITY_DN8969_c0_g1_i5.path2	Pepsico2_Contig660.path1	TRINITY_DN22698_c0_g1_i1.path1
TRINITY_DN27218_c0_g1_i3.path1	TRINITY_DN42509_c0_g1_i1.path1	TRINITY_DN1059_c0_g1_i4.path1	Pepsico1_Contig32727.path2
Pepsico2_Contig2988.path1	TRINITY_DN6860_c0_g1_i1.path1	novel.9142	novel.4044
TRINITY_DN21343_c0_g1_i4.path2	novel.368	TRINITY_DN6293_c0_g1_i1.path1	novel.8805
novel.7984	TRINITY_DN21191_c0_g1_i1.path1	novel.1927	novel.7371
novel.5733	TRINITY_DN17862_c0_g1_i5.path1	Pepsico2_Contig2625.path1	novel.8009
TRINITY_DN84024_c0_g1_i1.path2	Pepsico1_Contig1891.path1	TRINITY_DN99452_c0_g1_i1.path2	novel.2816
TRINITY_DN28942_c0_g1_i1.path1	Pepsico2_Contig1744.path1	TRINITY_DN15593_c0_g1_i1.path1	TRINITY_DN70501_c0_g1_i1.path1
TRINITY_DN43775_c0_g1_i1.path2	novel.6427	TRINITY_DN40297_c1_g1_i1.path1	novel.4107
novel.3010	Pepsico1_Contig7174.path1	novel.4061	TRINITY_DN6679_c0_g1_i1.path1
TRINITY_DN20764_c0_g3_i1.path1	TRINITY_DN16156_c0_g2_i1.path2	TRINITY_DN18387_c0_g1_i3.path1	TRINITY_DN35335_c0_g4_i2.path1
Pepsico2_Contig90.path1	novel.675	TRINITY_DN36977_c1_g1_i1.path1	Pepsico2_Contig17712.path1
TRINITY_DN53608_c0_g1_i4.path1	TRINITY_DN16929_c1_g1_i4.path1	TRINITY_DN2145_c0_g1_i1.path2	TRINITY_DN35472_c1_g1_i1.path1
Pepsico2_Contig7839.path2	TRINITY_DN31731_c0_g1_i2.path1	TRINITY_DN22584_c1_g1_i1.path1	TRINITY_DN62279_c0_g1_i1.path1
novel.4974	TRINITY_DN9897_c0_g2_i1.path2	novel.10153	TRINITY_DN36019_c1_g1_i1.path2
TRINITY_DN4901_c1_g1_i1.path1	novel.8819	Pepsico2_Contig13889.path2	TRINITY_DN28234_c0_g2_i1.path2
TRINITY_DN72339_c0_g1_i1.path1	TRINITY_DN7443_c0_g2_i1.path1	Pepsico2_Contig12764.path1	TRINITY_DN7830_c0_g2_i1.path1
TRINITY_DN94577_c0_g1_i1.path1	TRINITY_DN3216_c0_g1_i3.path2	Pepsico2_Contig399.path1	Pepsico2_Contig5887.path1
novel.7045	novel.414	novel.8181	novel.7655
TRINITY_DN34987_c0_g1_i2.path1	TRINITY_DN10241_c1_g3_i1.path1	novel.1955	TRINITY_DN34723_c0_g1_i1.path3
TRINITY_DN72271_c0_g1_i1.path1	Pepsico2_Contig8571.path1	TRINITY_DN69283_c0_g1_i1.path1	TRINITY_DN29095_c0_g1_i2.path1
TRINITY_DN30_c4_g1_i1.path1	Pepsico2_Contig12768.path1	TRINITY_DN976_c0_g1_i2.path2	TRINITY_DN19578_c0_g2_i1.path1
novel.10173	TRINITY_DN11897_c0_g1_i1.path2	TRINITY_DN30268_c0_g3_i2.path1	TRINITY_DN45570_c0_g1_i1.path1
novel.82	Pepsico1_Contig822.path1	Pepsico2_Contig4663.path1	Pepsico2_Contig9040.path1
novel.6633	Pepsico2_Contig3801.path1	novel.3013	TRINITY_DN42306_c0_g1_i3.path1
TRINITY_DN13702_c0_g1_i2.path1	novel.9216	TRINITY_DN99656_c0_g1_i1.path1	TRINITY_DN43817_c0_g1_i1.path1
TRINITY_DN148_c0_g1_i11.path3	TRINITY_DN88673_c0_g1_i1.path1	TRINITY_DN7714_c0_g1_i8.path2	TRINITY_DN11477_c1_g2_i1.path1
Pepsico1_Contig32062.path1	Pepsico2_Contig19604.path1	Pepsico1_Contig1659.path1	Pepsico2_Contig7436.path1
TRINITY_DN8622_c0_g1_i2.path1	TRINITY_DN72136_c0_g1_i1.path1	novel.2353	Pepsico1_Contig5048.path1
novel.7166	TRINITY_DN26200_c0_g1_i1.path1	novel.5555	TRINITY_DN32159_c0_g1_i1.path3
TRINITY_DN29865_c0_g1_i1.path2	Pepsico2_Contig1790.path2	TRINITY_DN15885_c0_g1_i1.path1	Pepsico2_Contig20155.path1
Pepsico1_Contig4000.path1	TRINITY_DN23713_c0_g1_i1.path1	TRINITY_DN8939_c0_g1_i1.path1	TRINITY_DN103002_c0_g1_i1.path1
novel.1686	TRINITY_DN101212_c0_g1_i1.path1	Pepsico1_Contig192.path1	TRINITY_DN9136_c1_g3_i1.path1
Pepsico2_Contig3793.path1	novel.4474	TRINITY_DN82468_c0_g1_i1.path1	TRINITY_DN15455_c0_g1_i7.path2
TRINITY_DN36206_c0_g1_i1.path1	TRINITY_DN68934_c0_g1_i1.path1	novel.7669	TRINITY_DN25872_c0_g1_i1.path2
TRINITY_DN30275_c0_g1_i1.path1	novel.4714	novel.1405	Pepsico2_Contig20075.path1
TRINITY_DN4885_c0_g3_i1.path1	TRINITY_DN29095_c0_g2_i1.path1	TRINITY_DN21511_c0_g1_i1.path1	novel.7989
novel.1421	Pepsico2_Contig15237.path1	TRINITY_DN12913_c0_g1_i2.path1	TRINITY_DN52988_c0_g1_i1.path1
TRINITY_DN47074_c0_g1_i1.path1	TRINITY_DN31417_c0_g2_i1.path1	novel.1363	Pepsico2_Contig3471.path1
Pepsico2_Contig17438.path1	Pepsico2_Contig20105.path1	TRINITY_DN43686_c0_g1_i1.path1	TRINITY_DN17413_c0_g4_i2.path1
TRINITY_DN41323_c0_g1_i2.path1	TRINITY_DN4474_c1_g1_i3.path2	TRINITY_DN106494_c0_g1_i1.path1	novel.10131
novel.1050	TRINITY_DN13609_c0_g1_i3.path1	Pepsico2_Contig11676.path2	TRINITY_DN8925_c0_g1_i1.path1
Pepsico2_Contig11127.path1	novel.2828	novel.2858	TRINITY_DN52025_c0_g2_i1.path1
TRINITY_DN11155_c0_g1_i2.path1	Pepsico2_Contig930.path1	TRINITY_DN21405_c1_g1_i7.path1	TRINITY_DN9845_c0_g1_i2.path1
TRINITY_DN78657_c0_g1_i1.path1	novel.6765	TRINITY_DN14050_c0_g1_i4.path1	Pepsico2_Contig3785.path1
TRINITY_DN46578_c0_g1_i1.path1	TRINITY_DN2518_c0_g1_i3.path1	TRINITY_DN6633_c0_g1_i5.path1	TRINITY_DN20980_c0_g1_i4.path1
TRINITY_DN11437_c0_g1_i2.path1	Pepsico2_Contig14330.path1	TRINITY_DN1580_c0_g1_i4.path2	TRINITY_DN45534_c0_g1_i1.path2
TRINITY_DN28232_c0_g1_i2.path1	novel.1803	novel.10311	TRINITY_DN15392_c0_g1_i1.path1
TRINITY_DN7703_c1_g1_i1.path2	TRINITY_DN90964_c0_g1_i1.path1	Pepsico2_Contig17571.path2	Pepsico2_Contig13659.path1
TRINITY_DN15545_c0_g2_i1.path1	Pepsico2_Contig14892.path2	TRINITY_DN14238_c1_g1_i1.path1	TRINITY_DN14061_c0_g2_i1.path1
novel.1901	Pepsico1_Contig516.path1	Pepsico2_Contig14670.path2	TRINITY_DN40927_c0_g1_i3.path1
TRINITY_DN17774_c0_g2_i1.path1	TRINITY_DN79340_c0_g1_i1.path1	TRINITY_DN6454_c0_g2_i1.path2	TRINITY_DN18117_c0_g1_i3.path3
Pepsico2_Contig3317.path1	TRINITY_DN21556_c0_g1_i1.path2	TRINITY_DN9742_c0_g1_i1.path1	novel.3904
Pepsico2_Contig344.path2	novel.6364	TRINITY_DN35162_c0_g1_i2.path1	TRINITY_DN28038_c0_g1_i1.path1
novel.8493	novel.9200	novel.4253	novel.10217
Pepsico1_Contig71.path1	Pepsico2_Contig12703.path1	Pepsico2_Contig746.path1	TRINITY_DN25758_c0_g1_i2.path1
novel.9607	Pepsico1_Contig7769.path1	novel.2074	Pepsico1_Contig332.path2
TRINITY_DN28234_c0_g2_i1.path2	novel.10450	TRINITY_DN253_c0_g2_i12.path1	Pepsico2_Contig18624.path1
novel.3973	novel.5743	TRINITY_DN11282_c2_g1_i1.path1	novel.1074
novel.9812	TRINITY_DN7691_c0_g1_i1.path2	TRINITY_DN859_c0_g4_i1.path1	TRINITY_DN24498_c0_g1_i2.path1
TRINITY_DN79688_c0_g1_i1.path1	Pepsico1_Contig1120.path2	Pepsico2_Contig7109.path1	TRINITY_DN79439_c0_g1_i1.path2
Pepsico2_Contig8228.path1	Pepsico2_Contig4681.path1	TRINITY_DN55600_c0_g1_i1.path1	Pepsico2_Contig6303.path1
novel.7852	Pepsico2_Contig20515.path1	TRINITY_DN106930_c0_g1_i1.path1	novel.1139
TRINITY_DN7328_c1_g1_i1.path1	novel.7592	novel.9814	novel.4049
TRINITY_DN21706_c1_g1_i1.path1	Pepsico2_Contig2528.path1	novel.3110	Pepsico2_Contig8830.path2
Pepsico2_Contig9735.path1	TRINITY_DN58650_c0_g1_i1.path1	TRINITY_DN98099_c0_g1_i1.path1	novel.9345
Pepsico1_Contig5975.path2	TRINITY_DN14268_c0_g1_i3.path1	Pepsico1_Contig501.path1	novel.2734
TRINITY_DN2547_c0_g1_i3.path1	Pepsico1_Contig277.path2	novel.5418	Pepsico2_Contig20779.path1
TRINITY_DN13823_c0_g1_i1.path1	novel.3089	TRINITY_DN88673_c0_g1_i1.path1	Pepsico2_Contig20350.path1
novel.1098	TRINITY_DN24672_c0_g1_i3.path1	Pepsico2_Contig14097.path1	Pepsico2_Contig2004.path2
Pepsico2_Contig439.path1	TRINITY_DN3062_c2_g1_i2.path1	Pepsico2_Contig8620.path1	TRINITY_DN16037_c0_g1_i2.path1
TRINITY_DN74997_c0_g1_i1.path1	Pepsico2_Contig8726.path1	TRINITY_DN17168_c0_g5_i1.path1	TRINITY_DN52817_c0_g1_i1.path1
Pepsico1_Contig1413.path1	TRINITY_DN90109_c0_g1_i1.path1	TRINITY_DN3543_c1_g1_i4.path1	TRINITY_DN56759_c0_g1_i4.path2
TRINITY_DN33163_c1_g1_i1.path1	TRINITY_DN31074_c1_g1_i1.path1	TRINITY_DN9886_c0_g1_i1.path1	TRINITY_DN7335_c0_g1_i7.path1
novel.9603	TRINITY_DN87888_c0_g1_i1.path1	TRINITY_DN49408_c0_g1_i1.path1	TRINITY_DN32690_c0_g2_i1.path1
TRINITY_DN33900_c0_g1_i1.path1	novel.5930	novel.7184	novel.7010
TRINITY_DN17307_c0_g1_i1.path2	TRINITY_DN30636_c0_g1_i3.path1	novel.5248	TRINITY_DN7691_c1_g2_i1.path1
TRINITY_DN40238_c1_g1_i1.path1	TRINITY_DN36019_c1_g1_i1.path1	Pepsico1_Contig557.path1	Pepsico2_Contig9507.path1
TRINITY_DN27316_c0_g1_i2.path2	TRINITY_DN50781_c0_g1_i1.path1	novel.503	novel.10311
novel.8486	novel.667	TRINITY_DN59933_c0_g1_i1.path1	novel.5538
novel.5530	Pepsico2_Contig4408.path1	Pepsico2_Contig19106.path1	TRINITY_DN10301_c1_g1_i3.path1
TRINITY_DN16584_c0_g1_i2.path1	novel.1826	novel.5260	Pepsico1_Contig34820.path1
novel.8808	Pepsico1_Contig7370.path1	Pepsico2_Contig17047.path1	TRINITY_DN37102_c0_g1_i2.path1
TRINITY_DN5704_c0_g7_i1.path1	TRINITY_DN72382_c0_g1_i1.path1	TRINITY_DN107608_c0_g1_i1.path1	TRINITY_DN7706_c0_g1_i9.path1
TRINITY_DN67035_c0_g1_i1.path1	TRINITY_DN37597_c0_g2_i1.path1	TRINITY_DN10241_c1_g3_i1.path1	Pepsico1_Contig7370.path1
TRINITY_DN20630_c0_g1_i1.path1	TRINITY_DN1583_c0_g1_i1.path1	TRINITY_DN30_c4_g1_i1.path1	Pepsico1_Contig52.path2
TRINITY_DN29954_c0_g1_i1.path1	Pepsico1_Contig2171.path1	TRINITY_DN1581_c0_g1_i3.path2	TRINITY_DN2067_c0_g1_i1.path1
Pepsico2_Contig17478.path1	TRINITY_DN66014_c0_g1_i1.path1	TRINITY_DN5180_c0_g2_i3.path1	Pepsico2_Contig14392.path1
[truncated: 12,382 more rows]
