# Supplementary material for: Using transcriptome sequencing (RNA-Seq) to screen genes involved in β-glucan biosynthesis and accumulation during oat seed development
Source: PeerJ. 2024 Sep 25;12:e17804. doi: 10.7717/peerj.17804 (PMC11438436; doi:10.7717/peerj.17804)
Supplement: Supplemental Information 12 [file peerj-12-17804-s012.xlsx]

## Sheet: UP
BY2vsBY1	BY3vsBY1	BY4vsBY1	BY5vsBY1		DY2vsDY1	DY3vsDY1	DY4vsDY1	DY5vsDY1
Pepsico2_Contig7596.path1	Pepsico1_Contig882.path1	Pepsico1_Contig882.path1	Pepsico1_Contig882.path1		TRINITY_DN15616_c0_g1_i5.path3	Pepsico2_Contig19859.path1	Pepsico2_Contig19859.path1	Pepsico2_Contig19859.path1
TRINITY_DN571_c0_g1_i1.path1	novel.329	novel.6653	novel.329		Pepsico2_Contig9477.path1	novel.9665	Pepsico2_Contig9426.path1	TRINITY_DN7630_c0_g1_i1.path3
TRINITY_DN35543_c0_g1_i4.path1	TRINITY_DN20167_c1_g1_i1.path1	novel.415	Pepsico2_Contig19708.path1		Pepsico2_Contig19157.path1	Pepsico2_Contig19104.path1	Pepsico2_Contig19157.path1	Pepsico1_Contig3571.path1
novel.6428	Pepsico2_Contig7935.path1	novel.329	Pepsico2_Contig20183.path1		Pepsico1_Contig5656.path1	novel.8929	TRINITY_DN7630_c0_g1_i1.path3	novel.5614
novel.2929	Pepsico2_Contig20183.path1	Pepsico2_Contig7935.path1	Pepsico2_Contig13121.path1		novel.9974	TRINITY_DN7630_c0_g1_i1.path3	Pepsico2_Contig20286.path2	Pepsico2_Contig19104.path1
Pepsico2_Contig14182.path1	novel.6653	novel.1189	Pepsico1_Contig2556.path1		TRINITY_DN31771_c0_g3_i1.path1	Pepsico2_Contig19245.path1	novel.5614	Pepsico2_Contig9426.path1
novel.7991	Pepsico2_Contig13121.path1	Pepsico2_Contig13121.path1	Pepsico2_Contig7935.path1		TRINITY_DN10665_c0_g1_i2.path1	Pepsico2_Contig19157.path1	novel.8929	Pepsico1_Contig882.path1
novel.3756	TRINITY_DN571_c0_g1_i1.path1	Pepsico2_Contig20183.path1	novel.415		TRINITY_DN8645_c0_g1_i16.path2	TRINITY_DN2180_c0_g1_i3.path1	novel.7137	Pepsico2_Contig14675.path1
novel.6653	Pepsico2_Contig7596.path1	TRINITY_DN571_c0_g1_i1.path1	novel.1189		TRINITY_DN12381_c0_g2_i1.path1	Pepsico2_Contig9276.path1	Pepsico1_Contig3571.path1	Pepsico1_Contig2556.path1
Pepsico2_Contig18542.path1	TRINITY_DN17440_c0_g1_i1.path1	TRINITY_DN4139_c0_g1_i1.path1	TRINITY_DN1196_c0_g1_i1.path1		TRINITY_DN8645_c0_g1_i16.path1	novel.9974	TRINITY_DN1634_c0_g1_i5.path1	Pepsico2_Contig9276.path1
Pepsico2_Contig18053.path1	Pepsico2_Contig19824.path1	TRINITY_DN13294_c0_g1_i1.path1	Pepsico2_Contig7596.path1		TRINITY_DN28145_c0_g3_i2.path1	Pepsico2_Contig20286.path2	Pepsico2_Contig9276.path1	novel.7137
TRINITY_DN2180_c0_g1_i3.path1	TRINITY_DN4139_c0_g1_i1.path1	Pepsico2_Contig7596.path1	TRINITY_DN13294_c0_g1_i1.path1		Pepsico2_Contig2890.path1	TRINITY_DN15616_c0_g1_i5.path3	TRINITY_DN2180_c0_g1_i3.path1	Pepsico2_Contig11248.path1
Pepsico2_Contig3519.path1	novel.1189	Pepsico2_Contig19708.path1	novel.7840		Pepsico1_Contig6170.path1	Pepsico2_Contig10729.path1	Pepsico1_Contig2556.path1	novel.8929
novel.1633	novel.6428	TRINITY_DN17440_c0_g1_i1.path1	novel.6653		TRINITY_DN33878_c0_g1_i2.path1	Pepsico2_Contig3465.path1	Pepsico1_Contig882.path1	Pepsico2_Contig19157.path1
TRINITY_DN17440_c0_g1_i1.path1	TRINITY_DN5937_c0_g1_i5.path1	Pepsico1_Contig28824.path2	Pepsico2_Contig19875.path1		Pepsico2_Contig2548.path1	Pepsico2_Contig9426.path1	novel.1417	TRINITY_DN1634_c0_g1_i5.path1
TRINITY_DN506_c0_g1_i4.path1	Pepsico2_Contig19669.path2	TRINITY_DN5937_c0_g1_i5.path1	novel.7991		TRINITY_DN17710_c0_g2_i2.path1	novel.2946	Pepsico2_Contig19104.path1	Pepsico2_Contig8789.path1
Pepsico2_Contig19114.path1	Pepsico2_Contig9426.path1	novel.7840	novel.6581		Pepsico2_Contig20286.path2	novel.1633	TRINITY_DN15616_c0_g1_i5.path3	Pepsico2_Contig19824.path1
Pepsico2_Contig19875.path1	Pepsico2_Contig2548.path1	novel.6581	TRINITY_DN5937_c0_g1_i5.path1		TRINITY_DN10545_c0_g1_i3.path1	novel.7137	novel.2946	Pepsico2_Contig20286.path2
Pepsico1_Contig28824.path2	novel.7991	novel.7602	TRINITY_DN452_c0_g1_i2.path1		novel.6907	TRINITY_DN21253_c0_g4_i1.path1	novel.9665	novel.2946
TRINITY_DN506_c0_g1_i4.path2	TRINITY_DN1196_c0_g1_i1.path1	TRINITY_DN1454_c0_g1_i1.path1	Pepsico1_Contig28824.path2		TRINITY_DN2180_c0_g1_i3.path1	Pepsico2_Contig19530.path1	Pepsico2_Contig2548.path1	TRINITY_DN17440_c0_g1_i1.path1
TRINITY_DN12207_c0_g1_i1.path1	Pepsico1_Contig28824.path2	Pepsico2_Contig19669.path2	Pepsico2_Contig17883.path1		Pepsico2_Contig19530.path1	TRINITY_DN28145_c0_g3_i2.path1	TRINITY_DN3870_c0_g1_i1.path1	TRINITY_DN2180_c0_g1_i3.path1
Pepsico2_Contig10729.path1	TRINITY_DN27290_c0_g1_i1.path1	TRINITY_DN1196_c0_g1_i1.path1	TRINITY_DN571_c0_g1_i1.path1		Pepsico2_Contig13651.path1	Pepsico1_Contig6170.path1	Pepsico2_Contig20237.path2	TRINITY_DN14549_c0_g2_i3.path1
TRINITY_DN4139_c0_g1_i1.path1	Pepsico2_Contig20237.path2	TRINITY_DN27290_c0_g1_i1.path1	Pepsico2_Contig19824.path1		Pepsico2_Contig19104.path1	TRINITY_DN15274_c0_g2_i5.path1	TRINITY_DN14549_c0_g2_i3.path1	novel.4347
Pepsico2_Contig17370.path1	Pepsico2_Contig17883.path1	novel.7991	TRINITY_DN3870_c0_g1_i1.path1		TRINITY_DN7472_c0_g1_i1.path1	Pepsico2_Contig2890.path1	Pepsico2_Contig8789.path1	novel.10099
novel.4115	Pepsico2_Contig8115.path1	novel.9577	TRINITY_DN5316_c0_g1_i5.path1		novel.9360	Pepsico2_Contig3659.path1	Pepsico2_Contig19245.path1	TRINITY_DN60222_c0_g1_i2.path1
TRINITY_DN3677_c0_g1_i9.path1	TRINITY_DN14549_c0_g2_i3.path1	Pepsico1_Contig97.path1	TRINITY_DN27290_c0_g1_i1.path1		TRINITY_DN46389_c0_g1_i1.path1	Pepsico1_Contig3571.path1	Pepsico2_Contig18037.path1	TRINITY_DN14549_c0_g1_i5.path1
TRINITY_DN5937_c0_g1_i5.path1	Pepsico2_Contig3005.path1	Pepsico2_Contig19824.path1	Pepsico2_Contig19669.path2		TRINITY_DN9393_c0_g1_i1.path1	TRINITY_DN506_c0_g1_i4.path1	TRINITY_DN12381_c0_g2_i1.path1	Pepsico1_Contig1269.path1
Pepsico2_Contig7773.path2	novel.7840	Pepsico2_Contig17883.path1	TRINITY_DN1454_c0_g1_i1.path1		novel.121	TRINITY_DN506_c0_g1_i4.path2	TRINITY_DN17440_c0_g1_i1.path1	TRINITY_DN506_c0_g1_i4.path2
TRINITY_DN1201_c2_g1_i2.path1	novel.3783	TRINITY_DN14549_c0_g2_i3.path1	TRINITY_DN17440_c0_g1_i1.path1		TRINITY_DN4456_c0_g2_i10.path3	novel.8054	Pepsico2_Contig3465.path1	Pepsico2_Contig2548.path1
TRINITY_DN53024_c0_g1_i1.path1	novel.7767	Pepsico2_Contig6727.path1	Pepsico2_Contig17571.path2		novel.4252	Pepsico2_Contig8546.path1	TRINITY_DN506_c0_g1_i4.path2	Pepsico2_Contig10729.path1
Pepsico2_Contig2548.path1	TRINITY_DN13294_c0_g1_i1.path1	Pepsico2_Contig20237.path2	Pepsico2_Contig20237.path1		TRINITY_DN18390_c0_g1_i1.path1	TRINITY_DN12381_c0_g2_i1.path1	Pepsico2_Contig19397.path1	TRINITY_DN3870_c0_g1_i1.path1
novel.9974	novel.9577	TRINITY_DN5316_c0_g1_i5.path1	Pepsico2_Contig3005.path1		novel.9665	novel.8750	TRINITY_DN8645_c0_g1_i16.path2	TRINITY_DN618_c0_g1_i2.path1
Pepsico2_Contig6727.path1	novel.3756	Pepsico2_Contig19875.path1	novel.7767		TRINITY_DN9494_c0_g1_i2.path1	TRINITY_DN10665_c0_g1_i2.path1	Pepsico2_Contig12144.path1	TRINITY_DN506_c0_g1_i4.path1
novel.4958	novel.4958	novel.6428	Pepsico2_Contig2548.path1		TRINITY_DN6102_c0_g1_i1.path1	Pepsico2_Contig11667.path1	Pepsico2_Contig20237.path1	novel.9577
Pepsico2_Contig20237.path1	Pepsico2_Contig6727.path1	novel.10099	TRINITY_DN494_c0_g2_i4.path1		novel.6696	Pepsico1_Contig5656.path1	TRINITY_DN14549_c0_g1_i5.path1	Pepsico2_Contig20237.path2
TRINITY_DN277_c2_g1_i1.path3	Pepsico2_Contig19875.path1	novel.7646	Pepsico2_Contig20237.path2		novel.2137	Pepsico2_Contig17727.path1	TRINITY_DN506_c0_g1_i4.path1	TRINITY_DN13998_c0_g2_i1.path1
Pepsico2_Contig2152.path1	novel.8642	novel.3783	novel.6428		Pepsico2_Contig3659.path1	Pepsico1_Contig1269.path1	novel.6907	TRINITY_DN15616_c0_g1_i5.path3
Pepsico2_Contig20237.path2	TRINITY_DN5316_c0_g1_i5.path1	Pepsico2_Contig3005.path1	TRINITY_DN4139_c0_g1_i1.path1		Pepsico1_Contig6110.path1	Pepsico2_Contig19824.path1	TRINITY_DN41519_c0_g1_i1.path1	Pepsico2_Contig17883.path1
Pepsico2_Contig8789.path1	Pepsico2_Contig6148.path1	novel.8642	Pepsico2_Contig6378.path1		TRINITY_DN14314_c1_g1_i2.path1	Pepsico2_Contig18053.path1	Pepsico2_Contig19669.path2	TRINITY_DN5937_c0_g1_i5.path1
novel.5640	Pepsico2_Contig20237.path1	TRINITY_DN32553_c0_g1_i1.path1	novel.9577		Pepsico2_Contig12122.path1	Pepsico2_Contig19917.path4	TRINITY_DN1040_c0_g1_i1.path1	TRINITY_DN1753_c0_g1_i1.path1
novel.3783	TRINITY_DN2180_c0_g1_i3.path1	Pepsico2_Contig2548.path1	novel.7602		Pepsico2_Contig18037.path1	TRINITY_DN8645_c0_g1_i16.path2	Pepsico1_Contig2899.path1	TRINITY_DN1580_c0_g1_i4.path1
novel.8642	Pepsico1_Contig3571.path1	novel.7767	Pepsico2_Contig14675.path1		TRINITY_DN65_c0_g2_i1.path1	Pepsico2_Contig17521.path1	novel.10099	novel.415
Pepsico2_Contig7656.path1	novel.10099	TRINITY_DN494_c0_g2_i4.path1	novel.3756		TRINITY_DN21706_c0_g1_i3.path2	novel.10099	TRINITY_DN8645_c0_g1_i16.path1	novel.1189
Pepsico1_Contig1025.path1	Pepsico2_Contig19114.path1	TRINITY_DN302_c0_g1_i4.path1	Pepsico2_Contig6727.path1		TRINITY_DN10665_c0_g1_i2.path2	novel.2798	novel.4347	novel.5207
novel.6818	novel.2929	Pepsico2_Contig14675.path1	TRINITY_DN2964_c0_g2_i1.path1		novel.2155	novel.6907	Pepsico2_Contig17521.path1	Pepsico2_Contig20237.path1
TRINITY_DN10826_c0_g1_i2.path1	Pepsico2_Contig17067.path1	Pepsico2_Contig20237.path1	TRINITY_DN17793_c0_g1_i1.path1		TRINITY_DN7630_c0_g1_i1.path3	TRINITY_DN5816_c0_g1_i8.path1	Pepsico2_Contig17883.path1	TRINITY_DN1196_c0_g1_i1.path1
Pepsico1_Contig3638.path2	Pepsico2_Contig19669.path1	Pepsico2_Contig19114.path1	TRINITY_DN21253_c0_g4_i1.path1		novel.6977	novel.3399	novel.5207	novel.7602
Pepsico2_Contig16947.path1	Pepsico2_Contig3519.path1	novel.6729	novel.10099		TRINITY_DN17122_c0_g1_i2.path1	Pepsico2_Contig12144.path1	Pepsico2_Contig17727.path1	novel.9665
Pepsico2_Contig11248.path1	novel.5407	TRINITY_DN25384_c0_g2_i1.path1	TRINITY_DN14549_c0_g2_i3.path1		Pepsico2_Contig17958.path1	TRINITY_DN8645_c0_g1_i16.path1	TRINITY_DN1196_c0_g1_i1.path1	Pepsico2_Contig18037.path1
Pepsico2_Contig7604.path1	Pepsico2_Contig18053.path1	Pepsico2_Contig18053.path1	TRINITY_DN9712_c0_g2_i1.path1		TRINITY_DN4456_c0_g2_i10.path4	Pepsico2_Contig7596.path1	Pepsico2_Contig14675.path1	Pepsico2_Contig19669.path2
Pepsico2_Contig17067.path1	Pepsico2_Contig18542.path1	Pepsico2_Contig9426.path1	novel.8642		TRINITY_DN41519_c0_g1_i1.path1	Pepsico2_Contig19497.path1	TRINITY_DN16122_c0_g1_i2.path1	Pepsico2_Contig19397.path1
Pepsico2_Contig19669.path2	TRINITY_DN10451_c0_g1_i2.path2	TRINITY_DN17463_c0_g1_i3.path1	TRINITY_DN32553_c0_g1_i1.path1		novel.5385	TRINITY_DN14549_c0_g1_i5.path1	Pepsico2_Contig3449.path1	novel.1633
TRINITY_DN606_c0_g1_i1.path1	TRINITY_DN556_c0_g1_i1.path3	Pepsico1_Contig3571.path1	Pepsico2_Contig19669.path1		Pepsico2_Contig13209.path1	Pepsico2_Contig16947.path2	TRINITY_DN60222_c0_g1_i2.path1	Pepsico2_Contig8546.path1
novel.1189	Pepsico2_Contig14022.path1	TRINITY_DN2180_c0_g1_i3.path1	Pepsico1_Contig3571.path1		novel.2151	Pepsico2_Contig16834.path1	TRINITY_DN14314_c1_g1_i2.path1	novel.2651
novel.6729	Pepsico2_Contig8789.path1	novel.3756	TRINITY_DN2180_c0_g1_i3.path1		TRINITY_DN771_c0_g1_i2.path1	Pepsico2_Contig4818.path1	novel.8750	novel.3756
TRINITY_DN11944_c0_g1_i1.path1	TRINITY_DN10059_c0_g2_i4.path1	TRINITY_DN1753_c0_g1_i1.path1	TRINITY_DN556_c0_g1_i1.path3		TRINITY_DN1543_c0_g1_i1.path2	TRINITY_DN41519_c0_g1_i1.path1	Pepsico1_Contig1269.path1	novel.8750
TRINITY_DN18638_c0_g3_i1.path1	novel.6818	TRINITY_DN2964_c0_g2_i1.path1	Pepsico2_Contig19114.path1		novel.6924	Pepsico2_Contig14182.path1	TRINITY_DN13998_c0_g2_i1.path1	Pepsico2_Contig19245.path1
Pepsico1_Contig4053.path1	TRINITY_DN506_c0_g1_i4.path1	Pepsico2_Contig3519.path1	TRINITY_DN10451_c0_g1_i2.path2		Pepsico2_Contig19859.path1	TRINITY_DN302_c0_g1_i4.path1	Pepsico2_Contig19824.path1	Pepsico2_Contig17727.path1
Pepsico2_Contig3005.path1	TRINITY_DN494_c0_g2_i4.path1	TRINITY_DN10451_c0_g1_i2.path2	TRINITY_DN9897_c0_g1_i1.path1		novel.6730	novel.9809	TRINITY_DN4139_c0_g1_i1.path1	TRINITY_DN4139_c0_g1_i1.path1
Pepsico2_Contig14825.path1	novel.4897	novel.4958	TRINITY_DN302_c0_g1_i4.path1		TRINITY_DN97971_c0_g1_i1.path1	novel.9577	TRINITY_DN106836_c0_g1_i1.path1	Pepsico2_Contig7596.path1
novel.2448	TRINITY_DN38626_c0_g3_i1.path1	TRINITY_DN9897_c0_g1_i1.path1	novel.6818		novel.8249	Pepsico2_Contig15269.path1	novel.7602	TRINITY_DN302_c0_g1_i4.path1
novel.4897	TRINITY_DN23526_c0_g1_i1.path1	novel.6818	Pepsico2_Contig12625.path1		Pepsico2_Contig19245.path1	TRINITY_DN12207_c0_g1_i1.path1	novel.9577	Pepsico2_Contig18053.path1
Pepsico1_Contig701.path2	novel.4115	novel.2693	TRINITY_DN90811_c0_g1_i1.path1		Pepsico2_Contig10729.path1	Pepsico2_Contig2548.path1	Pepsico2_Contig19917.path4	Pepsico2_Contig16776.path1
TRINITY_DN22584_c0_g3_i1.path1	TRINITY_DN1454_c0_g1_i1.path1	TRINITY_DN452_c0_g1_i2.path1	Pepsico2_Contig3519.path1		TRINITY_DN13621_c0_g1_i1.path1	novel.2291	novel.1633	TRINITY_DN21253_c0_g4_i1.path1
novel.4684	Pepsico2_Contig4411.path1	Pepsico2_Contig17169.path1	Pepsico2_Contig17169.path1		TRINITY_DN1040_c0_g1_i1.path1	novel.4577	Pepsico2_Contig18053.path1	Pepsico2_Contig3659.path1
TRINITY_DN10059_c0_g2_i4.path1	Pepsico2_Contig14675.path1	TRINITY_DN556_c0_g1_i1.path3	novel.6729		Pepsico2_Contig14131.path1	Pepsico2_Contig19114.path1	Pepsico2_Contig8546.path1	Pepsico2_Contig12144.path1
novel.1260	Pepsico1_Contig2899.path2	novel.2929	TRINITY_DN16176_c0_g1_i3.path1		novel.2360	Pepsico2_Contig3164.path1	Pepsico2_Contig8115.path1	TRINITY_DN1040_c0_g1_i1.path1
novel.5643	Pepsico2_Contig19708.path1	TRINITY_DN9712_c0_g2_i1.path1	Pepsico2_Contig18053.path1		TRINITY_DN4456_c0_g2_i10.path1	TRINITY_DN2455_c1_g1_i5.path1	Pepsico2_Contig10729.path1	Pepsico2_Contig19114.path1
TRINITY_DN5938_c0_g3_i1.path1	Pepsico2_Contig6378.path1	TRINITY_DN17793_c0_g1_i1.path1	Pepsico2_Contig11248.path1		novel.7460	Pepsico2_Contig18037.path1	TRINITY_DN302_c0_g1_i4.path1	novel.7767
TRINITY_DN16286_c0_g1_i4.path1	Pepsico2_Contig4421.path1	TRINITY_DN15559_c0_g2_i2.path2	Pepsico1_Contig97.path1		TRINITY_DN15274_c0_g2_i5.path1	novel.4347	Pepsico2_Contig3659.path1	TRINITY_DN24768_c0_g2_i1.path1
TRINITY_DN14607_c0_g1_i1.path1	TRINITY_DN9897_c0_g1_i1.path1	TRINITY_DN1634_c0_g1_i5.path1	Pepsico2_Contig8789.path1		TRINITY_DN302_c0_g1_i4.path1	Pepsico2_Contig3449.path1	TRINITY_DN21253_c0_g4_i1.path1	Pepsico1_Contig2899.path2
Pepsico2_Contig10648.path1	novel.8929	Pepsico1_Contig7579.path1	Pepsico2_Contig9426.path1		novel.1633	TRINITY_DN35543_c0_g1_i4.path1	novel.8249	TRINITY_DN571_c0_g1_i1.path1
novel.8929	novel.7602	Pepsico2_Contig11248.path1	Pepsico2_Contig17067.path1		Pepsico2_Contig20597.path2	Pepsico2_Contig17058.path1	novel.7767	TRINITY_DN9897_c0_g1_i1.path1
TRINITY_DN10451_c0_g1_i2.path2	Pepsico2_Contig17370.path1	TRINITY_DN8043_c0_g1_i2.path1	novel.2693		TRINITY_DN99656_c0_g1_i1.path1	TRINITY_DN16513_c0_g1_i5.path1	TRINITY_DN2455_c1_g1_i5.path1	Pepsico2_Contig19917.path4
novel.1553	TRINITY_DN2964_c0_g2_i1.path1	novel.4897	TRINITY_DN23526_c0_g1_i1.path1		Pepsico2_Contig583.path2	TRINITY_DN65_c0_g2_i1.path1	Pepsico2_Contig6727.path1	Pepsico2_Contig6727.path1
TRINITY_DN14549_c0_g2_i3.path1	Pepsico2_Contig14182.path1	Pepsico2_Contig18542.path1	Pepsico2_Contig20393.path1		TRINITY_DN34221_c0_g1_i1.path2	TRINITY_DN14549_c0_g2_i3.path1	Pepsico2_Contig4818.path1	Pepsico1_Contig2899.path1
Pepsico2_Contig8025.path1	TRINITY_DN1634_c0_g1_i5.path1	novel.8929	TRINITY_DN16122_c0_g1_i2.path1		TRINITY_DN7271_c0_g1_i3.path1	Pepsico2_Contig4567.path1	Pepsico2_Contig19497.path1	novel.3399
Pepsico2_Contig12144.path1	Pepsico2_Contig2152.path1	Pepsico2_Contig8546.path1	novel.4958		TRINITY_DN277_c2_g1_i1.path3	novel.6977	Pepsico1_Contig2899.path2	Pepsico2_Contig17521.path1
Pepsico2_Contig7520.path1	Pepsico2_Contig17956.path1	TRINITY_DN14607_c0_g1_i1.path1	TRINITY_DN25384_c0_g2_i1.path1		TRINITY_DN306_c0_g1_i5.path1	Pepsico2_Contig1180.path1	TRINITY_DN5937_c0_g1_i5.path1	novel.1417
novel.9609	Pepsico2_Contig5930.path1	Pepsico1_Contig1514.path1	TRINITY_DN23273_c0_g1_i2.path1		TRINITY_DN16513_c0_g1_i5.path1	TRINITY_DN11944_c0_g1_i1.path1	novel.7494	TRINITY_DN28145_c0_g3_i2.path1
Pepsico1_Contig97.path1	Pepsico2_Contig17169.path1	TRINITY_DN24768_c0_g2_i1.path1	Pepsico1_Contig910.path1		TRINITY_DN15210_c0_g1_i2.path1	Pepsico2_Contig13651.path1	Pepsico2_Contig19114.path1	Pepsico2_Contig4818.path1
Pepsico2_Contig17883.path1	novel.1288	TRINITY_DN16122_c0_g1_i2.path1	novel.4897		novel.10099	novel.4252	TRINITY_DN1753_c0_g1_i1.path1	novel.2798
Pepsico2_Contig20286.path2	TRINITY_DN302_c0_g1_i4.path1	Pepsico2_Contig19669.path1	TRINITY_DN1753_c0_g1_i1.path1		Pepsico2_Contig19917.path4	TRINITY_DN1040_c0_g1_i1.path1	TRINITY_DN45181_c0_g1_i2.path1	Pepsico2_Contig19530.path1
novel.9577	novel.415	TRINITY_DN23526_c0_g1_i1.path1	novel.1288		Pepsico2_Contig14131.path2	TRINITY_DN44824_c0_g1_i1.path4	TRINITY_DN7472_c0_g1_i1.path1	TRINITY_DN494_c0_g2_i4.path1
novel.1781	TRINITY_DN23273_c0_g1_i2.path1	Pepsico2_Contig6148.path1	novel.5747		novel.8054	novel.5207	Pepsico2_Contig4432.path1	Pepsico2_Contig4567.path1
TRINITY_DN302_c0_g1_i4.path1	Pepsico2_Contig7604.path1	Pepsico2_Contig6378.path1	Pepsico2_Contig9276.path1		TRINITY_DN13653_c0_g1_i2.path1	TRINITY_DN106836_c0_g1_i1.path1	Pepsico2_Contig20183.path1	TRINITY_DN2455_c1_g1_i5.path1
Pepsico2_Contig17114.path1	Pepsico1_Contig3638.path2	Pepsico2_Contig17571.path2	Pepsico2_Contig7699.path1		Pepsico1_Contig5677.path1	TRINITY_DN45181_c0_g1_i2.path1	novel.1189	Pepsico2_Contig20183.path1
TRINITY_DN1454_c0_g1_i1.path1	Pepsico2_Contig14825.path1	Pepsico1_Contig14950.path1	Pepsico2_Contig6611.path4		TRINITY_DN5976_c0_g1_i12.path2	TRINITY_DN306_c0_g1_i5.path1	TRINITY_DN4885_c0_g2_i1.path1	novel.6428
Pepsico2_Contig11065.path1	Pepsico2_Contig6259.path1	novel.639	Pepsico1_Contig14950.path1		novel.6923	novel.6428	novel.6428	TRINITY_DN11944_c0_g1_i1.path1
Pepsico1_Contig2899.path1	Pepsico2_Contig20487.path1	TRINITY_DN10451_c0_g1_i2.path1	novel.639		TRINITY_DN6846_c1_g1_i1.path1	Pepsico2_Contig16947.path1	novel.2798	novel.7840
Pepsico2_Contig20182.path1	TRINITY_DN1580_c0_g1_i4.path1	Pepsico2_Contig17067.path1	novel.7646		Pepsico2_Contig19690.path1	TRINITY_DN14314_c1_g1_i2.path1	Pepsico2_Contig7596.path1	Pepsico2_Contig12144.path2
Pepsico2_Contig17946.path1	TRINITY_DN35487_c0_g1_i2.path1	Pepsico2_Contig8789.path1	TRINITY_DN12_c0_g2_i1.path1		novel.4577	TRINITY_DN28145_c0_g2_i3.path1	novel.8514	Pepsico2_Contig19875.path1
novel.3399	TRINITY_DN6841_c0_g1_i2.path1	novel.4115	TRINITY_DN14607_c0_g1_i1.path1		novel.9809	Pepsico1_Contig15322.path1	novel.5533	Pepsico2_Contig13121.path1
Pepsico2_Contig971.path1	Pepsico2_Contig5930.path2	Pepsico2_Contig11059.path1	novel.2651		Pepsico2_Contig15312.path1	Pepsico2_Contig5930.path1	TRINITY_DN10806_c1_g3_i2.path1	TRINITY_DN16122_c0_g1_i2.path1
Pepsico2_Contig11300.path1	TRINITY_DN35543_c0_g1_i4.path1	TRINITY_DN23273_c0_g1_i2.path1	TRINITY_DN15559_c0_g2_i2.path2		TRINITY_DN4456_c0_g2_i10.path2	TRINITY_DN10665_c0_g1_i2.path2	novel.6977	novel.5533
TRINITY_DN7915_c0_g2_i2.path1	TRINITY_DN10451_c0_g1_i2.path1	Pepsico2_Contig12625.path1	Pepsico2_Contig11059.path1		TRINITY_DN18723_c0_g1_i1.path2	TRINITY_DN7472_c0_g1_i1.path1	Pepsico2_Contig15269.path1	TRINITY_DN23493_c0_g1_i1.path1
TRINITY_DN9897_c0_g1_i1.path1	TRINITY_DN452_c0_g1_i2.path1	TRINITY_DN41323_c0_g1_i2.path1	Pepsico2_Contig17114.path1		novel.4398	novel.8249	Pepsico2_Contig6259.path1	Pepsico2_Contig6259.path1
novel.4413	Pepsico1_Contig97.path1	Pepsico2_Contig6074.path1	Pepsico1_Contig1514.path1		TRINITY_DN50134_c0_g1_i1.path1	TRINITY_DN2960_c0_g1_i1.path1	TRINITY_DN15274_c0_g2_i5.path1	novel.5230
novel.7646	TRINITY_DN8043_c0_g1_i2.path1	novel.5747	TRINITY_DN3985_c0_g1_i1.path3		Pepsico2_Contig11409.path1	TRINITY_DN13635_c0_g1_i6.path2	TRINITY_DN40249_c0_g1_i1.path1	Pepsico2_Contig14182.path1
TRINITY_DN249_c1_g1_i1.path1	novel.2693	Pepsico1_Contig910.path1	Pepsico2_Contig18542.path1		novel.8929	Pepsico1_Contig3638.path2	TRINITY_DN14443_c0_g2_i4.path1	Pepsico2_Contig17946.path1
TRINITY_DN16015_c0_g2_i7.path1	novel.3547	Pepsico2_Contig7604.path1	TRINITY_DN12040_c0_g1_i15.path1		TRINITY_DN60733_c0_g1_i1.path2	Pepsico2_Contig17946.path1	Pepsico2_Contig20048.path1	novel.4413
Pepsico2_Contig7935.path1	TRINITY_DN506_c0_g1_i4.path2	Pepsico2_Contig7831.path1	Pepsico2_Contig20487.path1		TRINITY_DN59017_c0_g1_i1.path1	TRINITY_DN17440_c0_g1_i1.path1	TRINITY_DN23493_c0_g1_i1.path1	Pepsico2_Contig2890.path1
Pepsico2_Contig7514.path1	Pepsico1_Contig14950.path1	TRINITY_DN1580_c0_g1_i4.path1	TRINITY_DN60222_c0_g1_i2.path1		novel.7494	TRINITY_DN310_c1_g1_i3.path1	Pepsico2_Contig19530.path1	TRINITY_DN40249_c0_g1_i1.path1
TRINITY_DN41323_c0_g1_i2.path1	Pepsico2_Contig10729.path1	TRINITY_DN1139_c0_g1_i1.path1	TRINITY_DN6258_c0_g1_i1.path1		novel.2855	TRINITY_DN2173_c0_g2_i1.path1	novel.2651	Pepsico2_Contig6107.path1
novel.1417	TRINITY_DN41323_c0_g1_i2.path1	novel.2036	TRINITY_DN5056_c0_g1_i2.path1		Pepsico2_Contig7605.path1	TRINITY_DN4139_c0_g1_i1.path1	Pepsico2_Contig16947.path2	Pepsico2_Contig19497.path1
novel.5409	TRINITY_DN72_c1_g1_i2.path1	novel.1633	novel.3783		Pepsico2_Contig19268.path1	novel.1417	Pepsico2_Contig13121.path1	TRINITY_DN6841_c0_g1_i2.path1
novel.7767	novel.7646	TRINITY_DN90811_c0_g1_i1.path1	TRINITY_DN24768_c0_g2_i1.path1		TRINITY_DN6606_c0_g1_i1.path2	novel.8103	Pepsico2_Contig1180.path1	TRINITY_DN41323_c0_g1_i2.path1
Pepsico2_Contig19824.path1	TRINITY_DN24768_c0_g2_i1.path1	TRINITY_DN6841_c0_g1_i2.path1	TRINITY_DN3634_c0_g1_i4.path2		TRINITY_DN44824_c0_g1_i1.path4	Pepsico2_Contig6528.path1	Pepsico2_Contig4567.path1	novel.9809
Pepsico1_Contig3571.path1	TRINITY_DN16122_c0_g1_i2.path1	Pepsico2_Contig14182.path1	TRINITY_DN1139_c0_g1_i1.path1		TRINITY_DN13159_c0_g1_i4.path1	Pepsico2_Contig19875.path1	TRINITY_DN10470_c0_g1_i2.path1	TRINITY_DN45181_c0_g1_i2.path1
TRINITY_DN5816_c1_g1_i1.path1	TRINITY_DN14607_c0_g1_i1.path1	TRINITY_DN22937_c0_g1_i3.path1	novel.8037		TRINITY_DN15500_c0_g1_i3.path1	novel.1189	novel.3399	Pepsico2_Contig8115.path1
Pepsico2_Contig11059.path1	novel.7137	TRINITY_DN3985_c0_g1_i1.path3	TRINITY_DN14321_c0_g1_i1.path1		TRINITY_DN14237_c1_g1_i1.path1	TRINITY_DN32553_c0_g1_i1.path1	novel.7503	TRINITY_DN17793_c0_g1_i1.path1
Pepsico2_Contig1180.path1	Pepsico2_Contig7656.path1	Pepsico1_Contig1024.path1	Pepsico2_Contig6107.path1		novel.7602	TRINITY_DN4885_c0_g2_i1.path1	novel.4252	TRINITY_DN5220_c0_g1_i1.path1
TRINITY_DN16513_c0_g1_i5.path1	TRINITY_DN25384_c0_g2_i1.path1	Pepsico1_Contig2899.path1	novel.5207		TRINITY_DN4504_c1_g2_i1.path1	TRINITY_DN97971_c0_g1_i1.path1	Pepsico2_Contig5904.path1	Pepsico2_Contig5904.path1
TRINITY_DN771_c0_g1_i2.path1	Pepsico2_Contig7699.path1	TRINITY_DN34205_c0_g1_i1.path3	Pepsico1_Contig1024.path1		novel.5409	Pepsico2_Contig12144.path2	Pepsico1_Contig15322.path1	novel.6818
Pepsico2_Contig6534.path2	novel.5533	novel.1288	TRINITY_DN35487_c0_g1_i2.path1		TRINITY_DN7335_c0_g1_i7.path1	Pepsico2_Contig20237.path2	novel.1288	TRINITY_DN15338_c0_g1_i1.path1
TRINITY_DN20167_c1_g1_i1.path1	Pepsico2_Contig1759.path2	Pepsico2_Contig17114.path1	Pepsico2_Contig16939.path1		novel.2121	TRINITY_DN3677_c0_g1_i9.path1	TRINITY_DN12381_c0_g1_i1.path1	Pepsico2_Contig3449.path1
novel.3126	novel.4413	Pepsico2_Contig17370.path1	Pepsico1_Contig7579.path1		Pepsico1_Contig1269.path1	TRINITY_DN4456_c0_g2_i10.path4	TRINITY_DN32553_c0_g1_i1.path1	TRINITY_DN23273_c0_g1_i2.path1
TRINITY_DN16015_c0_g1_i1.path1	TRINITY_DN1753_c0_g1_i1.path1	novel.4684	TRINITY_DN41323_c0_g1_i2.path1		Pepsico2_Contig14140.path1	novel.2448	TRINITY_DN59017_c0_g1_i1.path1	novel.1288
Pepsico2_Contig6074.path1	Pepsico2_Contig12432.path1	Pepsico1_Contig4060.path1	Pepsico2_Contig2152.path1		TRINITY_DN6230_c1_g1_i1.path1	TRINITY_DN16585_c0_g1_i1.path1	TRINITY_DN494_c0_g2_i4.path1	Pepsico2_Contig17438.path1
Pepsico2_Contig12144.path2	Pepsico2_Contig17114.path1	TRINITY_DN10059_c0_g2_i4.path1	Pepsico2_Contig17849.path1		Pepsico2_Contig19350.path1	Pepsico2_Contig16793.path1	Pepsico2_Contig4899.path1	novel.8642
Pepsico1_Contig2677.path1	Pepsico2_Contig20182.path1	TRINITY_DN16176_c0_g1_i3.path1	TRINITY_DN10738_c0_g1_i1.path1		TRINITY_DN5816_c0_g1_i8.path1	TRINITY_DN4456_c0_g2_i10.path3	Pepsico1_Contig6110.path1	Pepsico2_Contig12432.path1
TRINITY_DN1196_c0_g1_i1.path1	novel.2651	TRINITY_DN34195_c0_g1_i2.path1	TRINITY_DN8043_c0_g1_i2.path1		Pepsico2_Contig20015.path1	Pepsico2_Contig6727.path1	TRINITY_DN10665_c0_g1_i2.path1	novel.4450
Pepsico2_Contig7773.path1	TRINITY_DN11944_c0_g1_i1.path1	Pepsico2_Contig6259.path1	TRINITY_DN10752_c0_g1_i1.path1		TRINITY_DN5232_c0_g1_i7.path1	Pepsico2_Contig20048.path1	TRINITY_DN618_c0_g1_i2.path1	TRINITY_DN32553_c0_g1_i1.path1
TRINITY_DN28145_c0_g3_i2.path1	TRINITY_DN6258_c0_g1_i1.path1	TRINITY_DN7066_c0_g1_i2.path1	TRINITY_DN1580_c0_g1_i4.path1		TRINITY_DN39896_c0_g1_i1.path2	novel.5533	novel.8054	TRINITY_DN5316_c0_g1_i5.path1
TRINITY_DN7472_c0_g1_i1.path1	TRINITY_DN21357_c0_g1_i1.path1	TRINITY_DN12_c0_g2_i1.path1	TRINITY_DN13048_c0_g1_i1.path1		TRINITY_DN9519_c0_g1_i4.path1	TRINITY_DN43131_c0_g1_i2.path1	TRINITY_DN10302_c0_g1_i5.path1	novel.9974
Pepsico2_Contig135.path1	TRINITY_DN1201_c2_g1_i2.path1	Pepsico2_Contig5904.path1	TRINITY_DN72_c1_g1_i2.path1		novel.10227	TRINITY_DN23705_c0_g2_i2.path2	TRINITY_DN13294_c0_g1_i1.path1	novel.5600
TRINITY_DN5076_c0_g1_i5.path1	TRINITY_DN38179_c0_g1_i1.path1	novel.1417	Pepsico2_Contig17090.path2		Pepsico2_Contig8556.path2	TRINITY_DN5937_c0_g1_i5.path1	TRINITY_DN5401_c0_g1_i7.path1	TRINITY_DN106836_c0_g1_i1.path1
Pepsico2_Contig14558.path1	TRINITY_DN17793_c0_g1_i1.path1	TRINITY_DN8849_c1_g1_i7.path1	TRINITY_DN14014_c1_g1_i1.path1		TRINITY_DN45181_c0_g1_i2.path1	novel.2360	Pepsico2_Contig12144.path2	TRINITY_DN12548_c0_g1_i3.path2
novel.10099	Pepsico2_Contig17090.path2	Pepsico2_Contig1842.path1	novel.8619		novel.5126	Pepsico1_Contig5677.path1	Pepsico1_Contig5677.path1	TRINITY_DN2960_c0_g1_i1.path1
Pepsico1_Contig1433.path1	novel.8103	Pepsico2_Contig6611.path4	Pepsico2_Contig7827.path1		novel.1441	TRINITY_DN22937_c0_g1_i3.path1	TRINITY_DN28145_c0_g2_i3.path1	novel.7494
Pepsico2_Contig17794.path1	TRINITY_DN9712_c0_g2_i1.path1	novel.6785	novel.5189		novel.5037	Pepsico2_Contig13724.path2	Pepsico2_Contig1759.path2	TRINITY_DN5401_c0_g1_i7.path1
TRINITY_DN13323_c0_g2_i1.path1	TRINITY_DN12207_c0_g1_i1.path1	TRINITY_DN17793_c0_g3_i2.path1	novel.2929		TRINITY_DN27443_c0_g1_i1.path1	novel.5409	TRINITY_DN44824_c0_g1_i1.path4	Pepsico2_Contig19479.path1
Pepsico2_Contig18178.path1	TRINITY_DN90811_c0_g1_i1.path1	novel.4450	novel.1633		novel.10230	novel.4317	TRINITY_DN24768_c0_g2_i1.path1	Pepsico2_Contig16939.path1
Pepsico2_Contig7699.path1	TRINITY_DN17463_c0_g1_i3.path1	Pepsico2_Contig20182.path1	TRINITY_DN7066_c0_g1_i2.path1		Pepsico2_Contig17727.path1	TRINITY_DN13159_c0_g1_i4.path1	novel.329	TRINITY_DN4812_c0_g2_i2.path1
TRINITY_DN13294_c0_g1_i1.path1	TRINITY_DN106836_c0_g1_i1.path1	Pepsico2_Contig12432.path1	TRINITY_DN6150_c0_g1_i3.path1		TRINITY_DN27062_c0_g1_i1.path1	TRINITY_DN18723_c0_g1_i1.path2	Pepsico2_Contig2890.path1	Pepsico2_Contig14022.path1
TRINITY_DN5857_c0_g1_i1.path1	Pepsico2_Contig17090.path1	TRINITY_DN20133_c0_g1_i3.path1	novel.5407		Pepsico1_Contig1479.path1	TRINITY_DN12913_c0_g1_i2.path3	TRINITY_DN35487_c0_g1_i2.path1	TRINITY_DN12207_c0_g1_i1.path1
TRINITY_DN21832_c0_g1_i1.path1	Pepsico2_Contig7773.path2	Pepsico2_Contig7514.path1	TRINITY_DN59339_c0_g1_i2.path2		novel.7503	TRINITY_DN10612_c0_g1_i14.path1	Pepsico2_Contig16947.path1	novel.2822
TRINITY_DN11017_c0_g2_i4.path3	Pepsico2_Contig6777.path1	novel.7228	TRINITY_DN10451_c0_g1_i2.path1		TRINITY_DN21253_c0_g4_i1.path1	Pepsico2_Contig3010.path1	novel.9809	novel.6977
Pepsico2_Contig14213.path1	TRINITY_DN754_c0_g1_i2.path1	Pepsico2_Contig2152.path1	TRINITY_DN34195_c0_g1_i2.path1		TRINITY_DN19855_c0_g2_i1.path1	Pepsico2_Contig5308.path1	TRINITY_DN23273_c0_g1_i2.path1	TRINITY_DN10806_c1_g3_i2.path1
Pepsico1_Contig14950.path1	Pepsico2_Contig12144.path1	novel.4413	TRINITY_DN10059_c0_g2_i4.path1		TRINITY_DN33707_c0_g1_i5.path1	Pepsico1_Contig6110.path1	novel.4317	Pepsico1_Contig97.path1
TRINITY_DN6139_c0_g2_i2.path1	TRINITY_DN22937_c0_g1_i3.path1	Pepsico2_Contig12144.path1	Pepsico2_Contig6777.path1		novel.1449	Pepsico1_Contig701.path2	TRINITY_DN27443_c0_g1_i1.path1	TRINITY_DN3985_c0_g1_i1.path3
novel.1098	Pepsico2_Contig3465.path1	Pepsico2_Contig17305.path4	Pepsico2_Contig6259.path1		TRINITY_DN1634_c0_g1_i5.path1	Pepsico2_Contig17114.path1	TRINITY_DN34245_c0_g1_i1.path1	novel.329
TRINITY_DN27335_c0_g1_i1.path1	Pepsico2_Contig20286.path2	TRINITY_DN14321_c0_g1_i1.path1	Pepsico2_Contig1842.path1		TRINITY_DN11328_c0_g1_i1.path1	Pepsico2_Contig1759.path2	TRINITY_DN8754_c0_g1_i2.path1	Pepsico2_Contig19350.path1
Pepsico2_Contig3465.path1	TRINITY_DN28452_c0_g1_i8.path1	Pepsico2_Contig20487.path1	TRINITY_DN826_c0_g1_i8.path2		novel.2448	Pepsico2_Contig19690.path1	Pepsico2_Contig19479.path1	Pepsico2_Contig17090.path1
Pepsico1_Contig37308.path1	Pepsico2_Contig7520.path1	Pepsico2_Contig7699.path1	novel.4413		novel.8514	Pepsico2_Contig8789.path1	Pepsico2_Contig5930.path1	Pepsico2_Contig5930.path1
Pepsico1_Contig882.path1	TRINITY_DN53024_c0_g1_i1.path1	TRINITY_DN5174_c1_g1_i2.path1	Pepsico2_Contig17090.path1		TRINITY_DN12207_c0_g1_i1.path1	novel.1863	Pepsico2_Contig19875.path1	TRINITY_DN8043_c0_g1_i2.path1
TRINITY_DN19898_c0_g5_i2.path1	TRINITY_DN20133_c0_g1_i3.path1	Pepsico2_Contig20286.path2	Pepsico2_Contig7604.path1		TRINITY_DN81327_c0_g1_i1.path1	Pepsico2_Contig12412.path1	TRINITY_DN2960_c0_g1_i1.path1	novel.7646
TRINITY_DN83983_c0_g1_i1.path1	Pepsico1_Contig2444.path1	TRINITY_DN35487_c0_g1_i2.path1	Pepsico2_Contig7831.path1		TRINITY_DN106711_c0_g1_i1.path1	TRINITY_DN18091_c0_g1_i1.path1	TRINITY_DN306_c0_g1_i5.path1	TRINITY_DN35487_c0_g1_i2.path1
TRINITY_DN1580_c0_g1_i4.path1	TRINITY_DN37282_c0_g1_i1.path2	Pepsico2_Contig3085.path1	novel.7228		Pepsico2_Contig11667.path1	novel.2855	TRINITY_DN754_c0_g1_i2.path1	TRINITY_DN4523_c1_g1_i1.path1
TRINITY_DN24768_c0_g2_i1.path1	TRINITY_DN43686_c0_g1_i1.path1	TRINITY_DN14356_c1_g1_i10.path2	Pepsico2_Contig4918.path1		Pepsico2_Contig18053.path1	Pepsico2_Contig7177.path1	TRINITY_DN41323_c0_g1_i2.path1	Pepsico2_Contig4421.path1
Pepsico2_Contig13099.path1	TRINITY_DN12040_c0_g1_i15.path1	novel.4758	TRINITY_DN11005_c1_g1_i2.path1		novel.4950	novel.7494	TRINITY_DN35543_c0_g1_i4.path1	TRINITY_DN754_c0_g1_i2.path1
TRINITY_DN27290_c0_g1_i1.path1	Pepsico2_Contig971.path1	Pepsico2_Contig16939.path1	novel.4450		TRINITY_DN9650_c0_g2_i1.path1	Pepsico2_Contig14675.path1	novel.587	TRINITY_DN3677_c0_g1_i9.path1
novel.5533	novel.1417	novel.2550	Pepsico1_Contig195.path1		novel.5207	Pepsico2_Contig19350.path1	novel.5600	Pepsico2_Contig4432.path1
novel.9736	TRINITY_DN17812_c0_g1_i4.path1	TRINITY_DN2385_c0_g1_i1.path2	TRINITY_DN25624_c0_g1_i4.path1		Pepsico2_Contig8546.path1	TRINITY_DN17530_c0_g1_i1.path3	TRINITY_DN11944_c0_g1_i1.path1	TRINITY_DN6258_c0_g1_i1.path1
TRINITY_DN21428_c0_g1_i3.path1	Pepsico2_Contig16939.path1	TRINITY_DN72_c1_g1_i2.path1	TRINITY_DN2960_c0_g1_i1.path1		TRINITY_DN115019_c0_g1_i1.path2	TRINITY_DN771_c0_g1_i2.path1	TRINITY_DN12548_c0_g1_i3.path2	TRINITY_DN1454_c0_g1_i1.path1
Pepsico2_Contig16793.path1	Pepsico2_Contig13099.path1	novel.8037	TRINITY_DN17793_c0_g3_i2.path1		TRINITY_DN51801_c0_g3_i2.path1	TRINITY_DN11017_c0_g2_i4.path3	Pepsico2_Contig11059.path1	Pepsico2_Contig20048.path1
Pepsico2_Contig3085.path1	TRINITY_DN38367_c0_g1_i1.path1	TRINITY_DN6258_c0_g1_i1.path1	TRINITY_DN10242_c0_g1_i5.path1		Pepsico2_Contig5904.path1	Pepsico2_Contig20393.path1	Pepsico2_Contig14182.path1	TRINITY_DN34245_c0_g1_i1.path1
Pepsico2_Contig17681.path1	Pepsico1_Contig473.path1	novel.2651	novel.7137		Pepsico2_Contig16947.path1	TRINITY_DN21016_c0_g1_i1.path1	Pepsico2_Contig4421.path1	TRINITY_DN1945_c0_g1_i3.path1
TRINITY_DN3985_c0_g1_i1.path3	TRINITY_DN12_c0_g2_i1.path1	Pepsico1_Contig2899.path2	novel.4758		TRINITY_DN10612_c0_g1_i14.path1	Pepsico2_Contig3005.path1	Pepsico2_Contig17946.path1	Pepsico2_Contig20393.path1
TRINITY_DN44649_c0_g1_i1.path1	TRINITY_DN29620_c1_g1_i2.path1	novel.5533	Pepsico2_Contig17370.path1		TRINITY_DN89619_c0_g1_i1.path1	TRINITY_DN20167_c1_g1_i1.path1	Pepsico2_Contig17090.path1	novel.7949
TRINITY_DN25287_c0_g2_i1.path1	Pepsico2_Contig4918.path1	Pepsico1_Contig37308.path1	TRINITY_DN29620_c1_g1_i2.path1		Pepsico1_Contig22443.path2	TRINITY_DN4288_c0_g1_i3.path1	novel.3756	TRINITY_DN14443_c0_g2_i4.path1
TRINITY_DN9385_c2_g1_i1.path1	Pepsico2_Contig17521.path1	TRINITY_DN23943_c0_g5_i1.path1	Pepsico1_Contig4060.path1		TRINITY_DN506_c0_g1_i4.path2	novel.4897	TRINITY_DN72_c1_g1_i2.path1	TRINITY_DN23496_c0_g1_i2.path2
Pepsico2_Contig17521.path1	TRINITY_DN18468_c0_g1_i6.path1	Pepsico2_Contig12144.path2	TRINITY_DN5180_c0_g2_i3.path1		Pepsico2_Contig19596.path1	Pepsico2_Contig7718.path1	novel.7840	novel.8054
TRINITY_DN54245_c0_g1_i1.path1	TRINITY_DN60222_c0_g1_i2.path1	novel.7137	TRINITY_DN7630_c0_g1_i1.path3		TRINITY_DN11598_c0_g1_i1.path1	Pepsico1_Contig1934.path1	TRINITY_DN17812_c0_g1_i4.path2	TRINITY_DN44824_c0_g1_i1.path4
TRINITY_DN14549_c0_g1_i5.path1	novel.660	novel.4346	TRINITY_DN11944_c0_g1_i1.path1		TRINITY_DN22030_c0_g1_i4.path1	Pepsico2_Contig4421.path1	Pepsico2_Contig16776.path1	TRINITY_DN17812_c0_g1_i4.path2
Pepsico2_Contig20183.path1	Pepsico2_Contig6074.path1	TRINITY_DN10738_c0_g1_i1.path1	TRINITY_DN236_c0_g1_i2.path1		TRINITY_DN2960_c0_g1_i1.path1	novel.9492	Pepsico2_Contig14991.path2	TRINITY_DN17812_c0_g1_i4.path1
Pepsico1_Contig7138.path1	Pepsico2_Contig17946.path1	Pepsico2_Contig1759.path2	Pepsico2_Contig12432.path1		Pepsico2_Contig11038.path1	TRINITY_DN11586_c0_g2_i3.path1	TRINITY_DN5220_c0_g1_i1.path1	Pepsico2_Contig14747.path1
TRINITY_DN26262_c0_g1_i1.path1	Pepsico2_Contig8062.path1	Pepsico2_Contig17090.path2	novel.3628		TRINITY_DN63863_c0_g1_i1.path1	novel.7503	TRINITY_DN20167_c1_g1_i1.path1	Pepsico2_Contig13099.path1
Pepsico2_Contig3536.path1	Pepsico2_Contig17563.path2	TRINITY_DN17812_c0_g1_i4.path1	novel.2036		TRINITY_DN12633_c0_g1_i2.path1	novel.5407	Pepsico2_Contig17438.path1	Pepsico2_Contig11059.path1
TRINITY_DN9701_c0_g1_i1.path1	Pepsico2_Contig6456.path1	TRINITY_DN13048_c0_g1_i1.path1	TRINITY_DN4812_c0_g2_i2.path1		Pepsico2_Contig748.path1	TRINITY_DN23493_c0_g1_i1.path1	TRINITY_DN12207_c0_g1_i1.path1	TRINITY_DN19139_c0_g1_i1.path1
TRINITY_DN17812_c0_g1_i4.path1	TRINITY_DN14549_c0_g1_i5.path1	TRINITY_DN11005_c1_g1_i2.path1	Pepsico2_Contig6456.path1		novel.1260	TRINITY_DN1968_c0_g1_i4.path2	novel.6818	TRINITY_DN6150_c0_g1_i3.path1
Pepsico2_Contig17958.path1	Pepsico2_Contig17438.path1	Pepsico2_Contig6107.path1	TRINITY_DN21931_c0_g1_i2.path1		TRINITY_DN16015_c0_g2_i7.path1	Pepsico2_Contig12502.path1	novel.4413	novel.8249
TRINITY_DN60462_c0_g1_i1.path1	TRINITY_DN2960_c0_g1_i1.path1	TRINITY_DN13998_c0_g2_i1.path1	novel.1627		Pepsico2_Contig12412.path1	TRINITY_DN31771_c0_g3_i1.path1	Pepsico2_Contig13099.path1	Pepsico1_Contig15322.path1
novel.1638	novel.1622	TRINITY_DN6150_c0_g1_i3.path1	Pepsico1_Contig2899.path2		Pepsico2_Contig9276.path1	novel.1553	TRINITY_DN14775_c0_g1_i8.path1	TRINITY_DN16176_c0_g1_i3.path1
Pepsico2_Contig16834.path1	TRINITY_DN4812_c0_g2_i2.path1	novel.5407	TRINITY_DN15198_c0_g1_i2.path2		novel.1553	TRINITY_DN4504_c1_g2_i1.path1	novel.7783	TRINITY_DN72_c1_g1_i2.path1
TRINITY_DN2964_c0_g2_i1.path1	Pepsico1_Contig1269.path1	Pepsico2_Contig17849.path1	Pepsico2_Contig5904.path1		novel.3888	Pepsico1_Contig1873.path2	TRINITY_DN28145_c0_g3_i2.path1	novel.6581
TRINITY_DN22741_c0_g2_i2.path1	novel.9974	Pepsico1_Contig5974.path1	Pepsico2_Contig12076.path1		TRINITY_DN22425_c0_g1_i1.path1	Pepsico2_Contig8025.path1	TRINITY_DN5316_c0_g1_i5.path1	TRINITY_DN41519_c0_g1_i1.path1
Pepsico2_Contig5226.path1	Pepsico1_Contig4060.path1	Pepsico2_Contig6777.path1	TRINITY_DN23943_c0_g5_i1.path1		TRINITY_DN50606_c0_g1_i1.path1	novel.8514	TRINITY_DN8043_c0_g1_i2.path1	TRINITY_DN5109_c0_g1_i2.path1
novel.826	TRINITY_DN3985_c0_g1_i1.path3	Pepsico2_Contig12076.path1	Pepsico2_Contig4435.path1		Pepsico2_Contig19818.path1	Pepsico2_Contig16776.path1	TRINITY_DN17812_c0_g1_i4.path1	Pepsico2_Contig15269.path1
Pepsico2_Contig8546.path1	TRINITY_DN38217_c0_g1_i1.path1	novel.1560	novel.1560		novel.7516	Pepsico2_Contig4899.path1	Pepsico1_Contig6170.path1	TRINITY_DN14314_c1_g1_i2.path1
Pepsico2_Contig4880.path1	Pepsico2_Contig6534.path2	TRINITY_DN59339_c0_g1_i2.path2	Pepsico2_Contig19157.path1		TRINITY_DN11511_c0_g1_i2.path1	novel.4450	novel.4450	Pepsico2_Contig17090.path2
TRINITY_DN80132_c0_g1_i1.path1	Pepsico2_Contig7831.path1	Pepsico2_Contig3465.path1	Pepsico2_Contig19795.path1		Pepsico2_Contig12841.path2	novel.9360	novel.5230	Pepsico2_Contig6777.path1
novel.2457	TRINITY_DN4491_c1_g1_i6.path1	novel.7076	TRINITY_DN53024_c0_g1_i1.path1		TRINITY_DN16767_c0_g1_i2.path1	Pepsico2_Contig17958.path1	TRINITY_DN4523_c1_g1_i1.path1	novel.1560
Pepsico2_Contig9970.path1	Pepsico1_Contig701.path2	Pepsico2_Contig7984.path2	TRINITY_DN754_c0_g1_i2.path1		Pepsico2_Contig10618.path1	novel.10007	TRINITY_DN9897_c0_g1_i1.path1	novel.8514
novel.2651	TRINITY_DN5904_c0_g1_i3.path1	Pepsico2_Contig10729.path1	Pepsico2_Contig6237.path1		TRINITY_DN36154_c0_g1_i3.path1	Pepsico2_Contig971.path1	TRINITY_DN15500_c0_g1_i3.path1	novel.5407
novel.6992	Pepsico2_Contig18037.path1	novel.7441	Pepsico2_Contig8546.path1		Pepsico2_Contig17946.path1	Pepsico2_Contig5904.path1	novel.732	novel.732
Pepsico2_Contig18089.path1	Pepsico2_Contig5650.path1	TRINITY_DN10752_c0_g1_i1.path1	TRINITY_DN1634_c0_g1_i5.path1		TRINITY_DN21607_c0_g3_i3.path1	Pepsico1_Contig2899.path2	TRINITY_DN4456_c0_g2_i10.path3	Pepsico1_Contig1024.path1
Pepsico2_Contig1759.path2	TRINITY_DN2389_c0_g1_i4.path1	TRINITY_DN3567_c0_g2_i2.path1	Pepsico1_Contig2899.path1		novel.2946	TRINITY_DN16286_c0_g1_i4.path1	Pepsico2_Contig14747.path1	Pepsico2_Contig8849.path1
Pepsico2_Contig3449.path1	TRINITY_DN2053_c0_g1_i15.path1	Pepsico2_Contig17090.path1	Pepsico2_Contig18112.path1		TRINITY_DN109564_c0_g1_i1.path1	TRINITY_DN18390_c0_g1_i1.path1	Pepsico2_Contig3164.path1	TRINITY_DN17463_c0_g1_i3.path1
novel.5900	TRINITY_DN5220_c0_g1_i1.path1	Pepsico2_Contig4421.path1	novel.5611		Pepsico2_Contig12144.path1	TRINITY_DN22425_c0_g1_i1.path1	TRINITY_DN13159_c0_g1_i4.path1	novel.307
Pepsico2_Contig17169.path1	Pepsico1_Contig5974.path1	TRINITY_DN12040_c0_g1_i15.path1	novel.7441		Pepsico2_Contig9102.path1	TRINITY_DN13998_c0_g2_i1.path1	TRINITY_DN1580_c0_g1_i4.path1	TRINITY_DN2173_c0_g2_i1.path1
TRINITY_DN14321_c0_g1_i1.path1	novel.8037	novel.1863	novel.7477		TRINITY_DN12913_c0_g1_i2.path3	novel.82	TRINITY_DN11017_c0_g2_i4.path3	Pepsico2_Contig17114.path1
Pepsico2_Contig17849.path1	Pepsico2_Contig6148.path2	TRINITY_DN4812_c0_g2_i2.path1	TRINITY_DN9890_c0_g1_i6.path1		TRINITY_DN30268_c0_g3_i2.path1	novel.2402	TRINITY_DN11593_c1_g1_i7.path2	TRINITY_DN6047_c0_g2_i3.path1
novel.7137	TRINITY_DN5174_c1_g1_i2.path1	TRINITY_DN16373_c0_g2_i1.path1	TRINITY_DN48507_c0_g1_i1.path1		TRINITY_DN30706_c0_g1_i2.path1	TRINITY_DN18161_c0_g1_i10.path1	Pepsico2_Contig16834.path1	TRINITY_DN13048_c0_g1_i1.path1
Pepsico2_Contig20342.path1	novel.1553	Pepsico2_Contig4539.path1	TRINITY_DN6841_c0_g1_i2.path1		novel.2226	TRINITY_DN606_c0_g1_i1.path1	Pepsico2_Contig15323.path1	novel.5409
Pepsico2_Contig2890.path1	Pepsico2_Contig12144.path2	TRINITY_DN27443_c0_g1_i1.path1	TRINITY_DN14549_c0_g1_i5.path1		novel.560	TRINITY_DN21607_c0_g3_i3.path1	Pepsico2_Contig12432.path1	novel.4577
novel.4317	TRINITY_DN13998_c0_g2_i1.path1	novel.6711	novel.8929		TRINITY_DN506_c0_g1_i4.path1	TRINITY_DN10059_c0_g2_i4.path1	TRINITY_DN4812_c0_g2_i2.path1	TRINITY_DN13294_c0_g1_i1.path1
TRINITY_DN23273_c0_g1_i2.path1	TRINITY_DN15559_c0_g2_i2.path2	TRINITY_DN5220_c0_g1_i1.path1	novel.7949		TRINITY_DN7514_c0_g1_i3.path2	novel.5614	Pepsico2_Contig6528.path1	TRINITY_DN10241_c1_g3_i1.path1
novel.4631	Pepsico2_Contig17563.path1	TRINITY_DN11944_c0_g1_i1.path1	novel.2550		TRINITY_DN4288_c0_g1_i3.path1	Pepsico2_Contig13209.path1	Pepsico2_Contig4411.path1	novel.8103
TRINITY_DN58767_c0_g1_i1.path1	TRINITY_DN4139_c0_g2_i1.path1	Pepsico2_Contig8136.path1	Pepsico2_Contig6237.path2		TRINITY_DN108772_c0_g1_i1.path1	Pepsico2_Contig13099.path1	TRINITY_DN8751_c0_g1_i3.path1	novel.2693
novel.7067	Pepsico2_Contig17849.path1	TRINITY_DN60222_c0_g1_i2.path1	TRINITY_DN30113_c1_g1_i1.path1		novel.1661	TRINITY_DN16122_c0_g1_i2.path1	novel.1863	TRINITY_DN2385_c0_g1_i1.path2
TRINITY_DN60222_c0_g1_i2.path1	novel.3399	TRINITY_DN25624_c0_g1_i4.path1	novel.2822		TRINITY_DN21547_c0_g2_i1.path2	Pepsico1_Contig28824.path2	TRINITY_DN23496_c0_g1_i2.path2	TRINITY_DN12040_c0_g1_i15.path1
Pepsico2_Contig12625.path1	TRINITY_DN6139_c0_g2_i2.path1	TRINITY_DN3634_c0_g1_i4.path2	TRINITY_DN28452_c0_g1_i8.path1		TRINITY_DN115019_c0_g1_i1.path3	Pepsico2_Contig11038.path1	novel.5176	TRINITY_DN8754_c0_g1_i2.path1
TRINITY_DN27295_c0_g1_i1.path1	Pepsico2_Contig4152.path1	Pepsico1_Contig2556.path1	novel.6785		Pepsico1_Contig701.path2	Pepsico2_Contig14558.path1	novel.2291	novel.8037
TRINITY_DN21253_c0_g4_i1.path1	Pepsico2_Contig8546.path1	TRINITY_DN3489_c0_g1_i2.path1	novel.5209		Pepsico2_Contig2197.path2	TRINITY_DN7964_c0_g1_i2.path1	novel.639	TRINITY_DN17530_c0_g1_i1.path3
Pepsico2_Contig16776.path1	TRINITY_DN13048_c0_g1_i1.path1	Pepsico2_Contig4432.path1	Pepsico2_Contig6148.path1		TRINITY_DN8233_c0_g3_i1.path1	TRINITY_DN11951_c0_g1_i1.path1	Pepsico2_Contig20393.path1	TRINITY_DN5816_c0_g1_i8.path1
TRINITY_DN23526_c0_g1_i1.path1	Pepsico2_Contig779.path1	Pepsico2_Contig6534.path2	TRINITY_DN19092_c0_g2_i1.path1		Pepsico2_Contig14292.path1	TRINITY_DN15500_c0_g1_i3.path1	TRINITY_DN22937_c0_g1_i3.path1	Pepsico2_Contig4435.path1
Pepsico2_Contig6148.path2	Pepsico2_Contig3449.path1	TRINITY_DN15198_c0_g1_i2.path2	TRINITY_DN5220_c0_g1_i1.path1		TRINITY_DN42279_c0_g1_i1.path1	TRINITY_DN13217_c0_g1_i1.path1	Pepsico2_Contig17090.path2	Pepsico2_Contig17571.path2
Pepsico2_Contig7605.path1	Pepsico2_Contig3722.path1	TRINITY_DN29620_c1_g1_i2.path1	TRINITY_DN2385_c0_g1_i1.path2		Pepsico2_Contig14558.path1	TRINITY_DN17502_c0_g1_i2.path1	novel.8642	Pepsico2_Contig3164.path1
Pepsico1_Contig2444.path1	Pepsico2_Contig9040.path1	Pepsico2_Contig17438.path1	Pepsico2_Contig17946.path1		novel.10228	Pepsico2_Contig2406.path2	TRINITY_DN55504_c0_g1_i1.path1	Pepsico1_Contig701.path2
novel.8054	TRINITY_DN88881_c0_g1_i1.path1	TRINITY_DN277_c2_g1_i1.path3	TRINITY_DN22937_c0_g1_i3.path1		Pepsico2_Contig13724.path2	TRINITY_DN7915_c0_g2_i2.path1	TRINITY_DN9712_c0_g2_i1.path1	TRINITY_DN27443_c0_g1_i1.path1
TRINITY_DN20133_c0_g1_i3.path1	TRINITY_DN45181_c0_g1_i2.path1	Pepsico2_Contig6456.path1	TRINITY_DN4714_c0_g1_i9.path1		Pepsico1_Contig47.path1	Pepsico1_Contig2899.path1	Pepsico2_Contig2134.path1	Pepsico2_Contig7827.path1
Pepsico2_Contig5308.path1	novel.8805	novel.5611	novel.5230		TRINITY_DN24409_c0_g1_i2.path1	novel.2690	Pepsico2_Contig16939.path1	Pepsico2_Contig1180.path1
TRINITY_DN13048_c0_g1_i1.path1	Pepsico2_Contig19129.path1	TRINITY_DN10242_c0_g1_i5.path1	TRINITY_DN11593_c1_g1_i7.path1		TRINITY_DN8311_c0_g1_i1.path2	Pepsico2_Contig8115.path1	TRINITY_DN11586_c0_g2_i3.path1	Pepsico2_Contig7699.path1
TRINITY_DN2389_c0_g1_i4.path1	TRINITY_DN30113_c1_g1_i1.path1	Pepsico2_Contig18037.path1	Pepsico2_Contig15323.path1		TRINITY_DN14238_c1_g1_i1.path1	Pepsico2_Contig20342.path1	TRINITY_DN10665_c0_g1_i2.path2	Pepsico2_Contig4411.path1
Pepsico2_Contig779.path1	TRINITY_DN33313_c0_g2_i2.path1	Pepsico2_Contig19129.path1	TRINITY_DN2960_c0_g2_i1.path1		TRINITY_DN2455_c1_g1_i5.path1	TRINITY_DN21706_c0_g1_i3.path2	TRINITY_DN112522_c0_g1_i1.path1	TRINITY_DN14775_c0_g1_i8.path1
novel.2291	Pepsico2_Contig1842.path1	Pepsico2_Contig19795.path1	Pepsico2_Contig19129.path1		Pepsico1_Contig27806.path1	Pepsico2_Contig6148.path1	Pepsico2_Contig7466.path1	Pepsico2_Contig17849.path1
TRINITY_DN53024_c0_g1_i1.path2	novel.5409	Pepsico2_Contig4435.path1	Pepsico2_Contig3465.path1		Pepsico2_Contig1718.path1	Pepsico2_Contig10648.path1	TRINITY_DN7469_c0_g1_i1.path1	Pepsico2_Contig12625.path1
Pepsico2_Contig17149.path1	Pepsico2_Contig7827.path1	Pepsico2_Contig4918.path1	TRINITY_DN32968_c0_g1_i1.path1		TRINITY_DN27112_c0_g3_i3.path1	Pepsico1_Contig47.path1	novel.8103	Pepsico2_Contig6378.path1
Pepsico2_Contig20286.path1	Pepsico1_Contig1873.path2	TRINITY_DN11593_c1_g1_i7.path1	TRINITY_DN10815_c0_g2_i1.path1		TRINITY_DN43131_c0_g1_i2.path1	Pepsico2_Contig18542.path1	novel.9245	Pepsico2_Contig1842.path1
TRINITY_DN28234_c1_g1_i1.path1	TRINITY_DN25624_c0_g1_i4.path1	TRINITY_DN5938_c0_g3_i1.path1	Pepsico2_Contig15237.path1		Pepsico2_Contig16992.path1	Pepsico2_Contig4411.path1	TRINITY_DN4456_c0_g2_i10.path4	novel.2466
TRINITY_DN12178_c0_g1_i2.path1	TRINITY_DN9385_c2_g1_i1.path1	TRINITY_DN5180_c0_g2_i3.path1	TRINITY_DN16373_c0_g2_i1.path1		novel.5176	novel.5643	novel.7646	TRINITY_DN9712_c0_g3_i2.path1
TRINITY_DN19139_c0_g1_i1.path1	Pepsico2_Contig660.path1	TRINITY_DN2960_c0_g1_i1.path1	Pepsico1_Contig5974.path1		TRINITY_DN11600_c0_g1_i1.path1	TRINITY_DN6846_c1_g1_i1.path1	TRINITY_DN5109_c0_g1_i2.path1	novel.5549
TRINITY_DN45181_c0_g1_i2.path1	TRINITY_DN2492_c0_g1_i1.path1	TRINITY_DN15073_c0_g1_i2.path1	Pepsico2_Contig12144.path2		novel.10101	Pepsico2_Contig20237.path1	TRINITY_DN21706_c0_g1_i3.path2	TRINITY_DN90811_c0_g1_i1.path1
novel.6131	novel.7029	TRINITY_DN10815_c0_g2_i1.path1	novel.6711		Pepsico2_Contig12058.path1	TRINITY_DN9897_c0_g1_i1.path1	Pepsico2_Contig2300.path1	novel.651
novel.2550	Pepsico2_Contig1180.path1	Pepsico2_Contig6417.path1	Pepsico2_Contig17438.path1		TRINITY_DN58060_c0_g1_i1.path1	TRINITY_DN14443_c0_g2_i4.path1	TRINITY_DN3106_c1_g1_i1.path1	Pepsico2_Contig4918.path1
Pepsico2_Contig9426.path1	novel.1863	TRINITY_DN24307_c0_g1_i1.path1	TRINITY_DN4515_c0_g1_i17.path1		Pepsico2_Contig8025.path1	Pepsico2_Contig14747.path1	TRINITY_DN13048_c0_g1_i1.path1	novel.9245
novel.7602	novel.1098	TRINITY_DN53024_c0_g1_i1.path1	novel.5533		TRINITY_DN6421_c0_g1_i4.path1	novel.3756	TRINITY_DN3677_c0_g1_i9.path1	novel.1627
Pepsico2_Contig8115.path1	novel.6711	Pepsico2_Contig17946.path1	Pepsico2_Contig7514.path1		TRINITY_DN32487_c0_g1_i2.path1	novel.1687	Pepsico1_Contig3638.path2	Pepsico2_Contig14627.path1
novel.5209	Pepsico2_Contig3315.path1	TRINITY_DN13217_c1_g1_i1.path1	TRINITY_DN106297_c0_g1_i1.path1		Pepsico1_Contig15322.path1	TRINITY_DN30653_c0_g1_i1.path1	novel.5407	novel.4381
novel.2402	TRINITY_DN34205_c0_g1_i1.path3	TRINITY_DN38217_c0_g1_i1.path1	novel.4115		TRINITY_DN16758_c0_g1_i1.path1	TRINITY_DN10545_c0_g1_i3.path1	TRINITY_DN6150_c0_g1_i3.path1	TRINITY_DN20133_c0_g1_i3.path2
TRINITY_DN13657_c0_g1_i2.path1	novel.2036	novel.8619	novel.3129		TRINITY_DN5609_c0_g1_i1.path2	novel.3013	TRINITY_DN43131_c0_g1_i2.path1	TRINITY_DN28452_c0_g1_i8.path1
TRINITY_DN37508_c0_g1_i2.path1	TRINITY_DN6877_c0_g1_i1.path1	novel.2193	novel.660		novel.7646	TRINITY_DN50606_c0_g1_i1.path1	TRINITY_DN17530_c0_g1_i1.path3	Pepsico2_Contig3005.path1
novel.2226	Pepsico2_Contig11059.path1	TRINITY_DN754_c0_g1_i2.path1	novel.7111		TRINITY_DN15240_c0_g1_i3.path1	TRINITY_DN7469_c0_g1_i1.path1	TRINITY_DN310_c1_g1_i3.path1	novel.2121
TRINITY_DN14489_c0_g1_i1.path1	novel.5747	Pepsico2_Contig5650.path1	Pepsico2_Contig6417.path1		TRINITY_DN11198_c0_g1_i5.path1	novel.2550	novel.6581	Pepsico2_Contig19708.path1
TRINITY_DN22937_c0_g1_i3.path1	Pepsico2_Contig19604.path1	Pepsico2_Contig13099.path1	TRINITY_DN14533_c0_g1_i4.path1		TRINITY_DN2743_c0_g1_i31.path1	TRINITY_DN10094_c0_g3_i1.path1	TRINITY_DN6258_c0_g1_i1.path1	TRINITY_DN11593_c1_g1_i7.path2
TRINITY_DN10286_c0_g1_i2.path1	Pepsico2_Contig14213.path1	Pepsico2_Contig7827.path1	Pepsico2_Contig7277.path2		novel.1402	Pepsico2_Contig14825.path1	TRINITY_DN70178_c0_g1_i1.path1	Pepsico1_Contig14950.path1
Pepsico2_Contig4693.path1	novel.8619	TRINITY_DN3174_c1_g1_i2.path1	Pepsico2_Contig7773.path2		Pepsico2_Contig19397.path1	novel.8808	novel.5549	Pepsico2_Contig14932.path1
TRINITY_DN24212_c0_g1_i1.path1	Pepsico2_Contig20048.path1	Pepsico2_Contig550.path1	novel.4684		TRINITY_DN16303_c0_g1_i4.path1	Pepsico2_Contig17438.path1	TRINITY_DN38367_c0_g1_i1.path1	TRINITY_DN53024_c0_g1_i1.path1
TRINITY_DN29954_c0_g1_i1.path1	Pepsico2_Contig11065.path1	Pepsico1_Contig3350.path2	TRINITY_DN2389_c0_g1_i4.path1		Pepsico2_Contig20128.path1	TRINITY_DN3985_c0_g1_i1.path3	novel.9457	novel.5258
novel.4381	novel.1260	Pepsico2_Contig5226.path1	novel.4381		TRINITY_DN78422_c0_g1_i2.path1	TRINITY_DN21253_c0_g5_i1.path1	TRINITY_DN10837_c0_g1_i1.path1	Pepsico2_Contig7773.path2
Pepsico2_Contig19350.path1	TRINITY_DN3870_c0_g1_i1.path1	TRINITY_DN3394_c1_g1_i3.path1	Pepsico2_Contig9970.path1		Pepsico2_Contig1180.path1	TRINITY_DN19139_c0_g1_i1.path1	TRINITY_DN3985_c0_g1_i1.path3	TRINITY_DN4456_c0_g2_i10.path4
TRINITY_DN25120_c0_g1_i1.path1	TRINITY_DN2960_c0_g2_i1.path1	novel.4381	novel.8506		TRINITY_DN26453_c0_g2_i5.path2	TRINITY_DN9393_c0_g1_i1.path1	Pepsico2_Contig6777.path1	TRINITY_DN11593_c1_g1_i7.path1
Pepsico1_Contig2899.path2	TRINITY_DN62134_c2_g1_i1.path1	Pepsico2_Contig6237.path2	TRINITY_DN19166_c0_g1_i6.path1		TRINITY_DN79263_c0_g1_i1.path1	TRINITY_DN12381_c0_g1_i1.path1	Pepsico1_Contig1873.path2	Pepsico2_Contig17795.path1
Pepsico2_Contig18011.path1	novel.7604	novel.6796	novel.7076		TRINITY_DN56186_c0_g1_i1.path1	Pepsico2_Contig19818.path1	novel.2193	Pepsico2_Contig8025.path1
Pepsico2_Contig12432.path1	TRINITY_DN14321_c0_g1_i1.path1	TRINITY_DN2960_c0_g2_i1.path1	novel.6796		TRINITY_DN2467_c0_g1_i3.path1	TRINITY_DN618_c0_g1_i2.path1	novel.2822	Pepsico2_Contig15323.path1
novel.2977	novel.8054	TRINITY_DN17829_c0_g1_i1.path2	Pepsico2_Contig12144.path1		Pepsico2_Contig14330.path1	TRINITY_DN17812_c0_g1_i4.path1	TRINITY_DN10545_c0_g1_i3.path1	TRINITY_DN22937_c0_g1_i3.path1
novel.678	TRINITY_DN78952_c0_g1_i1.path1	Pepsico2_Contig6237.path1	TRINITY_DN652_c0_g1_i1.path1		TRINITY_DN10470_c0_g1_i2.path1	Pepsico2_Contig14932.path1	Pepsico2_Contig17114.path1	novel.1863
TRINITY_DN13998_c0_g2_i1.path1	Pepsico1_Contig4053.path1	TRINITY_DN2389_c0_g1_i4.path1	Pepsico2_Contig6288.path1		novel.4347	TRINITY_DN78750_c0_g1_i1.path1	Pepsico2_Contig13724.path2	Pepsico1_Contig6170.path1
novel.8144	TRINITY_DN373_c0_g2_i8.path1	novel.5189	Pepsico1_Contig5243.path1		TRINITY_DN21016_c0_g1_i1.path1	novel.6818	TRINITY_DN12040_c0_g1_i15.path1	novel.656
TRINITY_DN29620_c1_g1_i2.path1	Pepsico2_Contig5976.path1	Pepsico1_Contig6507.path1	TRINITY_DN5321_c0_g1_i10.path1		novel.10120	TRINITY_DN3106_c1_g1_i1.path1	TRINITY_DN11593_c1_g1_i7.path1	Pepsico2_Contig16947.path2
Pepsico2_Contig7893.path1	TRINITY_DN10752_c0_g1_i1.path1	TRINITY_DN32968_c0_g1_i1.path1	TRINITY_DN16936_c0_g1_i1.path1		TRINITY_DN3843_c0_g1_i1.path1	TRINITY_DN1196_c0_g1_i1.path1	Pepsico2_Contig13209.path1	TRINITY_DN310_c1_g1_i3.path1
Pepsico1_Contig1873.path2	TRINITY_DN10738_c0_g1_i1.path1	novel.7029	Pepsico2_Contig7372.path1		Pepsico2_Contig8430.path1	Pepsico2_Contig16992.path1	Pepsico2_Contig3010.path1	TRINITY_DN19166_c0_g1_i6.path1
Pepsico2_Contig3476.path1	Pepsico2_Contig16793.path1	Pepsico1_Contig1269.path1	TRINITY_DN9659_c0_g2_i1.path1		Pepsico2_Contig9426.path1	novel.1260	novel.8037	Pepsico2_Contig7656.path1
Pepsico1_Contig1269.path1	TRINITY_DN34195_c0_g1_i2.path1	Pepsico1_Contig865.path1	TRINITY_DN1580_c0_g1_i4.path2		Pepsico1_Contig1649.path1	TRINITY_DN16513_c0_g2_i1.path1	TRINITY_DN16513_c0_g1_i5.path1	Pepsico2_Contig17169.path1
TRINITY_DN112522_c0_g1_i1.path1	novel.4684	TRINITY_DN14549_c0_g1_i5.path1	TRINITY_DN21428_c0_g1_i3.path1		novel.2670	TRINITY_DN4456_c0_g2_i10.path1	Pepsico2_Contig2406.path2	TRINITY_DN78422_c0_g1_i2.path1
Pepsico2_Contig6259.path1	TRINITY_DN11593_c1_g1_i7.path1	Pepsico2_Contig7773.path2	TRINITY_DN37338_c0_g1_i3.path1		TRINITY_DN96608_c0_g1_i1.path1	TRINITY_DN59017_c0_g1_i1.path1	Pepsico2_Contig11667.path1	TRINITY_DN5056_c0_g1_i2.path1
TRINITY_DN13498_c0_g2_i1.path1	Pepsico2_Contig19157.path1	TRINITY_DN30113_c1_g1_i1.path1	TRINITY_DN38217_c0_g1_i1.path1		Pepsico2_Contig13865.path1	TRINITY_DN27443_c0_g1_i1.path1	TRINITY_DN19139_c0_g1_i1.path1	novel.4317
novel.10016	TRINITY_DN27295_c0_g1_i1.path1	TRINITY_DN34195_c0_g1_i2.path2	TRINITY_DN320_c2_g1_i1.path2		novel.1187	TRINITY_DN16767_c0_g1_i2.path1	novel.4897	Pepsico1_Contig1873.path2
TRINITY_DN44751_c0_g1_i1.path1	TRINITY_DN29565_c0_g1_i3.path3	TRINITY_DN16045_c1_g1_i4.path1	Pepsico2_Contig19649.path2		TRINITY_DN2173_c0_g2_i1.path1	TRINITY_DN112522_c0_g1_i1.path1	novel.1785	Pepsico2_Contig16834.path1
TRINITY_DN10451_c0_g1_i2.path1	novel.1781	TRINITY_DN11938_c0_g1_i1.path1	TRINITY_DN10241_c1_g3_i1.path1		Pepsico1_Contig28824.path2	TRINITY_DN18488_c0_g1_i1.path1	Pepsico1_Contig1934.path1	Pepsico2_Contig6237.path1
TRINITY_DN13826_c0_g1_i3.path1	Pepsico1_Contig1514.path1	TRINITY_DN16295_c0_g1_i1.path2	novel.1229		TRINITY_DN23649_c0_g1_i2.path2	TRINITY_DN373_c0_g2_i8.path1	Pepsico1_Contig701.path2	TRINITY_DN23526_c0_g1_i1.path1
novel.7021	TRINITY_DN11005_c1_g1_i2.path1	Pepsico2_Contig7372.path1	Pepsico2_Contig3476.path1		Pepsico2_Contig7718.path1	Pepsico1_Contig22394.path1	Pepsico2_Contig6611.path4	Pepsico2_Contig3520.path1
Pepsico1_Contig865.path1	TRINITY_DN6150_c0_g1_i3.path1	TRINITY_DN28452_c0_g1_i8.path1	novel.732		TRINITY_DN79265_c0_g1_i1.path1	Pepsico2_Contig14140.path1	TRINITY_DN14607_c0_g1_i1.path1	novel.7783
TRINITY_DN21607_c0_g3_i3.path1	Pepsico2_Contig14558.path1	TRINITY_DN16572_c0_g1_i1.path1	TRINITY_DN431_c0_g1_i7.path2		TRINITY_DN28145_c0_g2_i3.path1	TRINITY_DN16303_c0_g1_i4.path1	TRINITY_DN5199_c0_g2_i1.path2	TRINITY_DN47812_c0_g1_i2.path1
novel.8805	novel.2550	Pepsico1_Contig771.path1	Pepsico2_Contig20182.path1		Pepsico2_Contig1298.path1	novel.7767	TRINITY_DN28089_c0_g1_i1.path1	novel.660
novel.8619	TRINITY_DN112522_c0_g1_i1.path1	novel.660	TRINITY_DN19139_c0_g1_i1.path1		novel.5156	TRINITY_DN1634_c0_g1_i5.path1	Pepsico2_Contig12502.path1	TRINITY_DN15272_c0_g2_i1.path1
TRINITY_DN24065_c0_g1_i1.path1	Pepsico1_Contig1029.path1	novel.2	TRINITY_DN25384_c0_g2_i1.path3		TRINITY_DN2173_c0_g1_i1.path1	Pepsico2_Contig12432.path1	TRINITY_DN34195_c0_g1_i2.path1	TRINITY_DN53024_c0_g1_i1.path2
TRINITY_DN9291_c0_g1_i1.path1	Pepsico1_Contig3093.path2	TRINITY_DN506_c0_g1_i4.path2	Pepsico2_Contig5650.path1		TRINITY_DN13048_c0_g1_i1.path1	TRINITY_DN11593_c1_g1_i7.path2	TRINITY_DN6841_c0_g1_i2.path1	TRINITY_DN1580_c0_g1_i4.path2
TRINITY_DN17793_c0_g1_i1.path1	Pepsico2_Contig4586.path1	Pepsico2_Contig779.path1	Pepsico1_Contig1269.path1		novel.1958	Pepsico2_Contig7773.path2	TRINITY_DN53024_c0_g1_i1.path1	novel.6907
Pepsico1_Contig1795.path1	Pepsico2_Contig17288.path1	Pepsico1_Contig1025.path1	novel.6394		TRINITY_DN51903_c0_g1_i1.path2	Pepsico1_Contig4053.path1	novel.10007	TRINITY_DN8148_c0_g1_i1.path1
TRINITY_DN16767_c0_g1_i2.path1	Pepsico2_Contig11248.path1	Pepsico1_Contig5243.path1	Pepsico1_Contig3350.path2		TRINITY_DN24342_c0_g2_i1.path1	novel.10101	TRINITY_DN2337_c0_g1_i6.path1	novel.1576
TRINITY_DN106836_c0_g1_i1.path1	novel.2457	Pepsico1_Contig37830.path1	TRINITY_DN5321_c0_g1_i10.path2		TRINITY_DN8148_c0_g1_i1.path1	TRINITY_DN8751_c0_g1_i3.path1	TRINITY_DN7127_c0_g2_i6.path1	TRINITY_DN8751_c0_g1_i3.path1
TRINITY_DN50606_c0_g1_i1.path1	TRINITY_DN13826_c0_g1_i3.path1	TRINITY_DN21931_c0_g1_i2.path1	TRINITY_DN26096_c0_g1_i4.path1		TRINITY_DN1201_c0_g1_i3.path1	Pepsico2_Contig14022.path1	Pepsico2_Contig4918.path1	Pepsico2_Contig779.path1
Pepsico2_Contig6456.path1	Pepsico2_Contig768.path1	novel.1627	TRINITY_DN506_c0_g1_i4.path2		Pepsico2_Contig17986.path1	TRINITY_DN24768_c0_g2_i1.path1	TRINITY_DN28452_c0_g1_i8.path1	TRINITY_DN14607_c0_g1_i1.path1
novel.9427	TRINITY_DN53024_c0_g1_i1.path2	Pepsico2_Contig8025.path1	Pepsico2_Contig13099.path1		TRINITY_DN16351_c0_g1_i2.path1	TRINITY_DN15885_c0_g1_i1.path2	Pepsico2_Contig6378.path1	TRINITY_DN55504_c0_g1_i1.path1
Pepsico2_Contig7718.path1	novel.9447	TRINITY_DN4515_c0_g1_i17.path1	novel.5740		TRINITY_DN31467_c1_g2_i2.path2	novel.7602	Pepsico2_Contig7827.path1	TRINITY_DN21253_c0_g5_i1.path1
TRINITY_DN2414_c1_g1_i3.path1	novel.6581	TRINITY_DN1201_c2_g1_i2.path1	TRINITY_DN17463_c0_g1_i3.path1		Pepsico2_Contig10427.path1	TRINITY_DN18638_c0_g3_i1.path1	Pepsico2_Contig19350.path1	TRINITY_DN15274_c0_g2_i5.path1
novel.1229	Pepsico2_Contig5904.path1	Pepsico2_Contig9970.path1	TRINITY_DN15239_c0_g1_i10.path1		TRINITY_DN30194_c0_g1_i5.path1	TRINITY_DN32487_c0_g1_i2.path1	Pepsico2_Contig17169.path1	novel.5611
Pepsico2_Contig8908.path1	novel.4346	novel.1553	TRINITY_DN2455_c1_g1_i5.path1		Pepsico2_Contig2406.path2	novel.5176	TRINITY_DN1945_c0_g1_i3.path1	TRINITY_DN14014_c1_g1_i1.path1
TRINITY_DN78750_c0_g1_i1.path1	Pepsico2_Contig4567.path1	Pepsico2_Contig14213.path1	novel.5700		novel.2404	TRINITY_DN10302_c0_g1_i5.path1	Pepsico2_Contig4435.path1	TRINITY_DN20167_c1_g1_i1.path1
TRINITY_DN5904_c0_g1_i3.path1	TRINITY_DN15073_c0_g1_i2.path1	TRINITY_DN21572_c0_g1_i1.path1	TRINITY_DN16373_c0_g1_i1.path1		Pepsico2_Contig14707.path1	TRINITY_DN55504_c0_g1_i1.path1	Pepsico2_Contig7656.path1	Pepsico1_Contig1514.path1
Pepsico2_Contig17305.path4	novel.1229	TRINITY_DN10241_c1_g3_i1.path1	TRINITY_DN4515_c0_g1_i17.path3		TRINITY_DN22584_c0_g2_i1.path1	Pepsico2_Contig20128.path1	novel.660	novel.8619
TRINITY_DN46537_c0_g1_i2.path1	Pepsico2_Contig18112.path1	TRINITY_DN236_c0_g1_i2.path1	Pepsico2_Contig1759.path2		TRINITY_DN18091_c0_g1_i1.path1	Pepsico2_Contig9477.path1	TRINITY_DN7915_c0_g2_i2.path1	TRINITY_DN10451_c0_g1_i2.path2
TRINITY_DN25384_c0_g2_i1.path3	novel.1560	Pepsico2_Contig17794.path1	Pepsico2_Contig4432.path1		TRINITY_DN18356_c0_g1_i1.path1	novel.7646	novel.2121	Pepsico2_Contig7831.path1
TRINITY_DN4812_c0_g2_i2.path1	novel.4846	Pepsico2_Contig20048.path1	TRINITY_DN1928_c0_g1_i7.path1		Pepsico2_Contig18276.path1	TRINITY_DN13217_c1_g1_i1.path1	TRINITY_DN33307_c0_g1_i2.path1	Pepsico2_Contig13004.path1
TRINITY_DN556_c0_g1_i1.path3	novel.639	Pepsico2_Contig19157.path1	novel.2798		TRINITY_DN23307_c0_g1_i1.path1	TRINITY_DN8754_c0_g1_i2.path1	novel.1560	TRINITY_DN4885_c0_g2_i1.path1
Pepsico2_Contig1309.path1	novel.4317	TRINITY_DN25384_c0_g2_i1.path3	Pepsico2_Contig20048.path1		TRINITY_DN6065_c0_g1_i2.path1	novel.4398	novel.9397	TRINITY_DN9712_c0_g2_i1.path1
TRINITY_DN29565_c0_g1_i3.path3	Pepsico2_Contig3476.path1	TRINITY_DN7068_c0_g1_i5.path1	novel.1863		Pepsico2_Contig2134.path1	novel.2193	Pepsico2_Contig14022.path1	Pepsico2_Contig10148.path1
TRINITY_DN90920_c0_g1_i1.path1	Pepsico2_Contig5308.path1	Pepsico2_Contig15237.path1	Pepsico2_Contig779.path1		TRINITY_DN52841_c0_g1_i1.path1	Pepsico2_Contig7175.path1	Pepsico2_Contig14932.path1	TRINITY_DN320_c2_g1_i1.path2
Pepsico2_Contig17090.path1	Pepsico2_Contig3536.path1	Pepsico2_Contig14022.path1	TRINITY_DN14356_c1_g1_i10.path2		Pepsico2_Contig1781.path1	TRINITY_DN9519_c0_g1_i4.path1	TRINITY_DN3567_c0_g2_i2.path1	TRINITY_DN10286_c0_g1_i2.path1
Pepsico2_Contig17404.path1	Pepsico2_Contig18011.path1	TRINITY_DN2098_c0_g2_i1.path1	TRINITY_DN6751_c0_g1_i5.path1		novel.8535	TRINITY_DN52025_c0_g2_i1.path1	TRINITY_DN17463_c0_g1_i3.path1	TRINITY_DN1928_c0_g1_i7.path1
novel.380	TRINITY_DN22584_c0_g3_i1.path1	novel.8498	TRINITY_DN22077_c0_g1_i12.path2		Pepsico2_Contig3164.path1	Pepsico2_Contig7605.path1	TRINITY_DN23526_c0_g1_i1.path1	TRINITY_DN28145_c0_g2_i3.path1
TRINITY_DN7122_c0_g1_i3.path1	TRINITY_DN8392_c0_g1_i2.path1	Pepsico2_Contig3722.path1	TRINITY_DN15198_c0_g3_i1.path1		TRINITY_DN102574_c0_g1_i1.path1	Pepsico2_Contig17169.path1	Pepsico2_Contig17849.path1	TRINITY_DN12548_c0_g1_i3.path1
novel.8037	novel.2402	novel.3628	TRINITY_DN53024_c0_g1_i1.path2		TRINITY_DN26039_c0_g1_i1.path1	novel.3143	novel.2693	novel.8181
Pepsico2_Contig10529.path2	Pepsico2_Contig6161.path1	novel.1229	TRINITY_DN52891_c0_g1_i1.path1		TRINITY_DN16223_c0_g2_i1.path2	Pepsico2_Contig15312.path1	Pepsico2_Contig7831.path1	TRINITY_DN7472_c0_g1_i1.path1
novel.1863	TRINITY_DN1580_c0_g1_i4.path2	Pepsico2_Contig18112.path1	TRINITY_DN2492_c0_g1_i1.path1		Pepsico2_Contig2197.path1	TRINITY_DN5976_c0_g1_i12.path2	Pepsico2_Contig3005.path1	novel.1396
novel.1513	Pepsico2_Contig7984.path2	TRINITY_DN4714_c0_g1_i9.path1	novel.3259		TRINITY_DN101418_c0_g1_i1.path1	TRINITY_DN277_c2_g1_i1.path3	novel.9360	TRINITY_DN17793_c0_g3_i2.path1
TRINITY_DN25287_c0_g3_i1.path1	TRINITY_DN3567_c0_g2_i2.path1	novel.4929	TRINITY_DN2053_c0_g1_i15.path1		novel.5643	TRINITY_DN5076_c0_g1_i5.path1	Pepsico1_Contig4053.path1	Pepsico2_Contig17682.path1
TRINITY_DN28452_c0_g1_i8.path1	novel.5230	Pepsico1_Contig195.path1	TRINITY_DN17829_c0_g1_i1.path2		Pepsico2_Contig8794.path2	TRINITY_DN9402_c0_g1_i1.path1	Pepsico1_Contig5656.path1	TRINITY_DN3567_c0_g2_i2.path1
Pepsico2_Contig17712.path1	novel.2575	novel.7949	TRINITY_DN4172_c0_g1_i16.path1		novel.4897	Pepsico2_Contig7656.path1	novel.656	TRINITY_DN32288_c0_g3_i1.path1
TRINITY_DN32286_c0_g2_i1.path1	TRINITY_DN22012_c1_g1_i1.path1	TRINITY_DN16936_c0_g1_i1.path1	novel.5549		TRINITY_DN76552_c0_g1_i1.path1	TRINITY_DN5857_c0_g1_i1.path1	novel.2138	TRINITY_DN70178_c0_g1_i1.path1
TRINITY_DN11163_c1_g2_i1.path1	TRINITY_DN34253_c0_g1_i1.path1	TRINITY_DN10286_c0_g1_i2.path1	Pepsico2_Contig8136.path1		TRINITY_DN31278_c0_g1_i1.path1	TRINITY_DN28089_c0_g1_i1.path1	Pepsico2_Contig16793.path1	Pepsico2_Contig6148.path1
Pepsico1_Contig5249.path1	novel.5209	Pepsico2_Contig7520.path1	Pepsico2_Contig6463.path1		novel.372	Pepsico2_Contig14213.path1	Pepsico2_Contig7773.path2	TRINITY_DN306_c0_g1_i5.path1
Pepsico2_Contig13865.path1	Pepsico2_Contig4899.path1	novel.10337	TRINITY_DN10097_c0_g1_i2.path1		Pepsico2_Contig12291.path1	Pepsico2_Contig4432.path1	novel.5310	TRINITY_DN40419_c0_g1_i1.path1
TRINITY_DN754_c0_g1_i2.path1	novel.1627	TRINITY_DN37338_c0_g1_i3.path1	Pepsico2_Contig660.path1		novel.2921	Pepsico2_Contig17404.path1	TRINITY_DN15210_c0_g1_i2.path1	TRINITY_DN2337_c0_g1_i6.path1
novel.7165	Pepsico1_Contig5319.path1	novel.6254	TRINITY_DN4139_c0_g2_i1.path1		TRINITY_DN10295_c0_g2_i1.path1	TRINITY_DN43808_c0_g4_i1.path1	TRINITY_DN4288_c0_g1_i3.path1	TRINITY_DN13217_c1_g1_i1.path1
TRINITY_DN32603_c0_g1_i1.path1	Pepsico2_Contig11300.path1	TRINITY_DN45181_c0_g1_i2.path1	Pepsico2_Contig19859.path1		TRINITY_DN56186_c0_g1_i1.path2	TRINITY_DN13776_c0_g1_i3.path1	TRINITY_DN47812_c0_g1_i2.path1	TRINITY_DN26096_c0_g1_i4.path1
novel.329	novel.4381	TRINITY_DN26096_c0_g1_i4.path1	TRINITY_DN16522_c0_g1_i3.path1		TRINITY_DN18663_c0_g3_i1.path1	TRINITY_DN41323_c0_g1_i2.path1	novel.8257	TRINITY_DN7127_c0_g2_i6.path1
TRINITY_DN15087_c1_g1_i1.path1	novel.6785	Pepsico2_Contig6463.path1	TRINITY_DN16572_c0_g1_i1.path1		TRINITY_DN16585_c0_g1_i1.path1	TRINITY_DN22584_c0_g2_i1.path1	TRINITY_DN11951_c0_g1_i1.path1	Pepsico2_Contig9970.path1
novel.4061	novel.7076	Pepsico2_Contig4586.path1	TRINITY_DN10242_c0_g1_i5.path2		Pepsico2_Contig2625.path1	TRINITY_DN15210_c0_g1_i2.path1	Pepsico2_Contig17795.path1	Pepsico1_Contig3638.path2
TRINITY_DN22425_c0_g1_i1.path1	Pepsico1_Contig1433.path1	novel.2676	TRINITY_DN3174_c1_g1_i2.path1		Pepsico2_Contig5308.path1	TRINITY_DN4502_c2_g1_i1.path1	novel.2690	TRINITY_DN4504_c1_g2_i1.path1
TRINITY_DN2354_c0_g1_i4.path2	Pepsico2_Contig19350.path1	TRINITY_DN9659_c0_g2_i1.path1	novel.3594		Pepsico2_Contig4880.path1	novel.9457	novel.9609	Pepsico2_Contig17067.path1
TRINITY_DN59954_c0_g1_i3.path1	Pepsico2_Contig4432.path1	TRINITY_DN4139_c0_g2_i1.path1	Pepsico2_Contig8025.path1		Pepsico2_Contig20393.path1	TRINITY_DN14241_c0_g1_i1.path1	Pepsico2_Contig19690.path1	Pepsico2_Contig16947.path1
TRINITY_DN2053_c0_g1_i15.path1	TRINITY_DN10782_c0_g1_i1.path1	novel.5230	TRINITY_DN34195_c0_g1_i2.path2		TRINITY_DN27339_c0_g1_i1.path1	TRINITY_DN9494_c0_g1_i2.path1	Pepsico2_Contig6148.path1	TRINITY_DN236_c0_g1_i2.path1
TRINITY_DN2185_c0_g1_i8.path1	Pepsico2_Contig20023.path1	TRINITY_DN19166_c0_g1_i6.path1	novel.1576		TRINITY_DN50072_c0_g1_i1.path1	TRINITY_DN1580_c0_g1_i4.path1	TRINITY_DN10451_c0_g1_i2.path2	novel.829
TRINITY_DN27443_c0_g1_i1.path1	TRINITY_DN21253_c0_g4_i1.path1	TRINITY_DN1580_c0_g1_i4.path2	novel.5409		TRINITY_DN30268_c0_g5_i1.path1	TRINITY_DN28234_c0_g2_i1.path2	Pepsico2_Contig20342.path1	Pepsico2_Contig18112.path1
TRINITY_DN36731_c0_g1_i1.path2	TRINITY_DN15198_c0_g3_i1.path1	novel.2160	TRINITY_DN3634_c0_g1_i4.path1		Pepsico2_Contig17114.path1	TRINITY_DN47812_c0_g1_i2.path1	TRINITY_DN1968_c0_g1_i4.path2	TRINITY_DN452_c0_g1_i2.path1
novel.3663	TRINITY_DN24307_c0_g1_i1.path1	TRINITY_DN9701_c0_g1_i1.path1	TRINITY_DN24307_c0_g1_i1.path1		novel.9577	novel.5230	TRINITY_DN4456_c0_g2_i10.path1	Pepsico2_Contig17370.path1
Pepsico2_Contig14315.path1	TRINITY_DN106898_c0_g1_i1.path1	novel.6949	Pepsico2_Contig10729.path1		novel.10335	TRINITY_DN60733_c0_g1_i1.path2	Pepsico2_Contig14558.path1	novel.2929
TRINITY_DN37868_c0_g1_i1.path1	Pepsico2_Contig19649.path2	Pepsico2_Contig19795.path2	TRINITY_DN3394_c1_g1_i3.path1		TRINITY_DN22732_c0_g2_i3.path1	Pepsico2_Contig12841.path2	TRINITY_DN10059_c0_g2_i4.path1	Pepsico2_Contig17563.path2
Pepsico2_Contig1781.path1	TRINITY_DN4172_c0_g1_i16.path1	Pepsico2_Contig660.path1	novel.4924		TRINITY_DN79387_c0_g1_i1.path1	novel.6249	TRINITY_DN10286_c0_g1_i2.path1	TRINITY_DN39335_c0_g1_i1.path2
TRINITY_DN2960_c0_g1_i1.path1	novel.5549	novel.5700	Pepsico2_Contig6534.path2		TRINITY_DN16257_c1_g1_i5.path2	TRINITY_DN108478_c0_g1_i1.path4	Pepsico1_Contig3093.path2	TRINITY_DN652_c0_g1_i1.path1
novel.6006	Pepsico2_Contig3085.path1	novel.3129	TRINITY_DN14061_c0_g3_i2.path1		novel.3399	TRINITY_DN10806_c1_g3_i2.path1	TRINITY_DN53024_c0_g1_i1.path2	TRINITY_DN38367_c0_g1_i1.path1
TRINITY_DN107608_c0_g1_i1.path1	TRINITY_DN39335_c0_g1_i1.path1	TRINITY_DN13323_c0_g2_i1.path1	novel.2193		TRINITY_DN46714_c0_g1_i1.path1	novel.1927	TRINITY_DN26096_c0_g1_i4.path1	Pepsico1_Contig6934.path1
Pepsico2_Contig4918.path1	Pepsico1_Contig5243.path1	TRINITY_DN19139_c0_g1_i1.path1	Pepsico2_Contig12412.path1		Pepsico2_Contig20608.path1	Pepsico2_Contig17370.path1	novel.1687	TRINITY_DN3634_c0_g1_i4.path2
TRINITY_DN25384_c0_g2_i1.path1	TRINITY_DN16495_c0_g1_i1.path2	TRINITY_DN652_c0_g1_i1.path1	Pepsico2_Contig7984.path2		TRINITY_DN3104_c1_g2_i1.path1	novel.2457	Pepsico2_Contig15237.path1	Pepsico1_Contig1934.path1
TRINITY_DN15916_c0_g1_i1.path1	TRINITY_DN5857_c0_g1_i1.path1	novel.3399	Pepsico2_Contig550.path1		TRINITY_DN16543_c0_g2_i1.path1	TRINITY_DN4456_c0_g2_i10.path2	TRINITY_DN18488_c0_g1_i1.path1	TRINITY_DN10451_c0_g1_i2.path1
TRINITY_DN308_c0_g1_i1.path1	TRINITY_DN19139_c0_g1_i1.path1	TRINITY_DN14533_c0_g1_i4.path1	novel.6254		TRINITY_DN38680_c0_g1_i1.path1	TRINITY_DN15240_c0_g1_i3.path1	novel.2466	TRINITY_DN14321_c0_g1_i1.path1
Pepsico2_Contig17956.path1	Pepsico2_Contig7316.path1	novel.8487	novel.2676		novel.9466	novel.3473	TRINITY_DN25186_c0_g1_i1.path1	novel.4897
TRINITY_DN99439_c0_g1_i1.path1	TRINITY_DN22959_c0_g1_i1.path2	novel.1098	novel.8805		TRINITY_DN47288_c0_g1_i1.path1	Pepsico2_Contig4435.path1	TRINITY_DN18091_c0_g1_i1.path1	TRINITY_DN5199_c0_g2_i1.path2
Pepsico2_Contig2406.path1	TRINITY_DN16176_c0_g1_i3.path1	TRINITY_DN78422_c0_g1_i2.path1	TRINITY_DN16045_c1_g1_i4.path1		Pepsico1_Contig6738.path1	TRINITY_DN8648_c0_g1_i4.path2	Pepsico2_Contig17370.path1	novel.1687
Pepsico2_Contig18037.path1	TRINITY_DN23943_c0_g5_i1.path1	TRINITY_DN2455_c1_g1_i5.path1	TRINITY_DN13657_c0_g1_i2.path1		TRINITY_DN5076_c0_g1_i5.path1	novel.2454	novel.2454	Pepsico2_Contig4899.path1
novel.3043	TRINITY_DN249_c1_g1_i1.path1	novel.1781	TRINITY_DN100308_c0_g1_i1.path1		TRINITY_DN494_c0_g2_i4.path1	novel.1396	TRINITY_DN2173_c0_g2_i1.path1	Pepsico2_Contig14991.path1
TRINITY_DN21860_c1_g1_i1.path1	TRINITY_DN35_c0_g2_i1.path1	novel.7636	TRINITY_DN1928_c0_g1_i7.path2		novel.5310	novel.656	novel.6254	TRINITY_DN25186_c0_g1_i1.path1
novel.2360	Pepsico2_Contig2890.path1	novel.2822	TRINITY_DN13217_c1_g1_i1.path1		novel.687	TRINITY_DN5220_c0_g1_i1.path1	TRINITY_DN16045_c1_g1_i4.path1	novel.6394
TRINITY_DN27809_c0_g1_i1.path1	Pepsico2_Contig17404.path1	novel.7357	novel.8487		Pepsico2_Contig16834.path1	TRINITY_DN8122_c0_g1_i5.path1	TRINITY_DN14014_c1_g1_i1.path1	novel.10007
TRINITY_DN82040_c0_g1_i1.path1	novel.2556	TRINITY_DN14061_c0_g3_i2.path1	novel.5614		TRINITY_DN30653_c0_g1_i1.path1	TRINITY_DN10853_c0_g1_i1.path1	novel.9492	TRINITY_DN12_c0_g2_i1.path1
Pepsico1_Contig4345.path1	TRINITY_DN1019_c0_g2_i1.path1	TRINITY_DN19177_c0_g1_i1.path1	Pepsico2_Contig651.path2		Pepsico2_Contig19268.path2	novel.2121	Pepsico2_Contig14627.path1	TRINITY_DN16373_c0_g2_i1.path1
TRINITY_DN1019_c0_g2_i1.path1	novel.2822	Pepsico1_Contig24518.path1	TRINITY_DN32286_c0_g2_i1.path1		novel.651	Pepsico2_Contig748.path1	TRINITY_DN10094_c0_g3_i1.path1	Pepsico2_Contig7177.path1
TRINITY_DN39623_c0_g1_i1.path1	Pepsico1_Contig2556.path1	TRINITY_DN9890_c0_g1_i6.path1	Pepsico2_Contig19795.path2		Pepsico2_Contig3010.path1	Pepsico2_Contig7839.path1	TRINITY_DN4502_c0_g2_i1.path1	TRINITY_DN10302_c0_g1_i5.path1
novel.9227	Pepsico1_Contig1934.path2	Pepsico1_Contig4010.path1	TRINITY_DN8849_c1_g1_i7.path1		Pepsico2_Contig4899.path1	TRINITY_DN12254_c0_g1_i1.path1	TRINITY_DN10190_c0_g1_i5.path1	novel.6711
Pepsico2_Contig19917.path4	TRINITY_DN22741_c0_g2_i2.path1	Pepsico1_Contig701.path2	Pepsico2_Contig17305.path4		Pepsico2_Contig9136.path1	TRINITY_DN13294_c0_g1_i1.path1	Pepsico2_Contig7839.path1	TRINITY_DN15272_c0_g3_i1.path1
Pepsico2_Contig16783.path1	Pepsico2_Contig16776.path1	TRINITY_DN16373_c0_g1_i1.path1	Pepsico2_Contig7520.path1		TRINITY_DN10890_c0_g2_i1.path1	TRINITY_DN10826_c0_g1_i2.path1	TRINITY_DN90811_c0_g1_i1.path1	TRINITY_DN13294_c1_g1_i1.path1
TRINITY_DN40354_c0_g1_i2.path1	TRINITY_DN78750_c0_g1_i1.path1	Pepsico2_Contig19649.path2	novel.1417		TRINITY_DN8648_c0_g1_i4.path2	Pepsico2_Contig8794.path2	Pepsico2_Contig9370.path1	Pepsico1_Contig5656.path1
TRINITY_DN11330_c1_g1_i1.path2	Pepsico2_Contig18182.path1	Pepsico2_Contig3476.path1	Pepsico2_Contig18257.path1		Pepsico2_Contig15519.path2	TRINITY_DN6102_c0_g1_i1.path1	novel.5258	novel.7729
Pepsico2_Contig6528.path1	Pepsico2_Contig135.path1	TRINITY_DN15198_c0_g3_i1.path1	TRINITY_DN23908_c0_g1_i2.path1		TRINITY_DN41418_c0_g1_i3.path1	novel.5037	TRINITY_DN40419_c0_g1_i1.path1	TRINITY_DN14533_c0_g1_i4.path1
TRINITY_DN2960_c0_g2_i1.path1	TRINITY_DN48507_c0_g1_i1.path1	Pepsico2_Contig3536.path1	TRINITY_DN12929_c0_g1_i1.path2		novel.7089	TRINITY_DN14356_c1_g1_i10.path2	TRINITY_DN4502_c2_g1_i1.path1	novel.2550
Pepsico1_Contig5974.path1	TRINITY_DN14475_c0_g2_i3.path1	TRINITY_DN3870_c0_g1_i1.path1	TRINITY_DN17812_c0_g1_i4.path1		TRINITY_DN1968_c0_g1_i4.path2	novel.5925	TRINITY_DN9519_c0_g1_i4.path1	TRINITY_DN11005_c1_g1_i2.path1
Pepsico2_Contig8440.path1	Pepsico2_Contig6528.path1	TRINITY_DN9693_c0_g1_i7.path1	TRINITY_DN3567_c0_g2_i2.path1		TRINITY_DN108824_c0_g1_i1.path1	novel.4413	TRINITY_DN648_c1_g1_i8.path1	TRINITY_DN10738_c0_g1_i1.path1
TRINITY_DN11951_c0_g1_i1.path1	Pepsico2_Contig15237.path1	TRINITY_DN50781_c0_g1_i1.path1	TRINITY_DN49146_c0_g1_i1.path2		TRINITY_DN14495_c0_g1_i2.path1	TRINITY_DN23496_c0_g1_i2.path2	Pepsico2_Contig6456.path1	Pepsico2_Contig13724.path2
Pepsico2_Contig17438.path1	TRINITY_DN26611_c0_g2_i1.path1	TRINITY_DN53024_c0_g1_i1.path2	Pepsico2_Contig3085.path1		TRINITY_DN89105_c0_g1_i1.path1	Pepsico1_Contig6738.path1	Pepsico2_Contig14991.path1	TRINITY_DN4975_c0_g1_i3.path2
TRINITY_DN50781_c0_g1_i1.path1	Pepsico2_Contig17047.path1	Pepsico2_Contig1180.path1	novel.8079		Pepsico2_Contig4420.path1	TRINITY_DN14775_c0_g1_i8.path1	Pepsico2_Contig7175.path1	TRINITY_DN5857_c0_g1_i1.path1
novel.660	TRINITY_DN14443_c0_g2_i4.path1	novel.8805	TRINITY_DN34205_c0_g1_i1.path3		novel.3397	Pepsico2_Contig2406.path1	Pepsico1_Contig28290.path1	Pepsico2_Contig7514.path1
Pepsico2_Contig18112.path1	TRINITY_DN18638_c0_g3_i1.path1	TRINITY_DN21428_c0_g1_i3.path1	novel.4360		novel.6082	novel.7840	novel.9321	novel.8144
TRINITY_DN4502_c2_g1_i1.path1	Pepsico2_Contig17305.path4	novel.5863	TRINITY_DN4604_c0_g2_i1.path1		TRINITY_DN34221_c0_g1_i1.path1	TRINITY_DN10470_c0_g1_i2.path1	TRINITY_DN6909_c0_g1_i6.path1	TRINITY_DN10059_c0_g2_i4.path1
novel.4450	novel.9339	Pepsico1_Contig28290.path1	TRINITY_DN45181_c0_g1_i2.path1		novel.2935	Pepsico2_Contig11059.path1	novel.1622	Pepsico2_Contig2300.path1
Pepsico1_Contig24518.path1	TRINITY_DN14061_c0_g2_i1.path2	novel.6394	TRINITY_DN41786_c0_g1_i3.path1		novel.2402	novel.7783	novel.5409	TRINITY_DN112522_c0_g1_i1.path1
TRINITY_DN31771_c0_g3_i1.path1	TRINITY_DN17463_c0_g1_i3.path3	TRINITY_DN82762_c0_g1_i1.path1	TRINITY_DN59954_c0_g1_i3.path1		TRINITY_DN10437_c0_g1_i2.path1	Pepsico2_Contig13724.path1	TRINITY_DN23705_c0_g2_i2.path2	TRINITY_DN4456_c0_g2_i10.path3
Pepsico2_Contig12502.path1	Pepsico2_Contig17681.path1	Pepsico1_Contig636.path1	novel.5258		TRINITY_DN32809_c0_g1_i2.path1	Pepsico2_Contig13865.path1	Pepsico2_Contig17986.path1	novel.9397
novel.1477	Pepsico2_Contig19649.path1	TRINITY_DN1945_c0_g1_i3.path1	TRINITY_DN4606_c0_g2_i1.path1		TRINITY_DN8680_c0_g1_i1.path2	Pepsico2_Contig4539.path1	novel.2137	TRINITY_DN648_c1_g1_i8.path1
Pepsico2_Contig8136.path1	novel.10016	Pepsico1_Contig916.path1	Pepsico1_Contig37830.path1		TRINITY_DN5235_c0_g2_i1.path1	TRINITY_DN452_c0_g1_i2.path1	TRINITY_DN13776_c0_g1_i3.path1	Pepsico1_Contig28824.path2
novel.5350	TRINITY_DN5816_c1_g1_i1.path1	TRINITY_DN22077_c0_g1_i12.path2	TRINITY_DN12642_c0_g1_i9.path1		TRINITY_DN13776_c0_g1_i3.path1	TRINITY_DN27339_c0_g1_i1.path1	novel.1396	novel.7503
novel.5747	TRINITY_DN21428_c0_g1_i3.path1	novel.7111	TRINITY_DN44824_c0_g1_i1.path4		Pepsico2_Contig6846.path1	novel.1622	TRINITY_DN7335_c0_g1_i7.path1	TRINITY_DN11902_c0_g2_i2.path1
TRINITY_DN8375_c1_g1_i2.path1	Pepsico2_Contig7466.path1	TRINITY_DN100308_c0_g1_i1.path1	novel.7029		Pepsico2_Contig2607.path1	novel.2226	novel.5925	Pepsico2_Contig6288.path1
TRINITY_DN13270_c0_g1_i2.path1	Pepsico2_Contig13724.path2	TRINITY_DN19306_c0_g1_i4.path1	TRINITY_DN33313_c0_g2_i2.path1		TRINITY_DN79340_c0_g1_i1.path1	TRINITY_DN11349_c0_g1_i2.path2	Pepsico2_Contig12412.path1	TRINITY_DN21428_c0_g1_i3.path1
TRINITY_DN10962_c1_g1_i1.path1	novel.9333	novel.5925	TRINITY_DN3489_c0_g1_i2.path1		TRINITY_DN10302_c0_g1_i5.path1	TRINITY_DN2761_c0_g2_i3.path1	novel.829	TRINITY_DN61085_c0_g1_i1.path1
TRINITY_DN11005_c1_g1_i2.path1	Pepsico2_Contig19245.path1	TRINITY_DN14775_c0_g1_i8.path1	Pepsico1_Contig37308.path1		novel.9338	TRINITY_DN12547_c0_g1_i1.path1	TRINITY_DN12_c0_g2_i1.path1	TRINITY_DN7915_c0_g2_i2.path1
Pepsico2_Contig19129.path1	TRINITY_DN9701_c0_g1_i1.path1	Pepsico2_Contig12692.path5	novel.8498		TRINITY_DN33204_c0_g1_i1.path1	TRINITY_DN27335_c0_g1_i1.path1	novel.8619	Pepsico2_Contig12412.path1
TRINITY_DN19392_c0_g2_i1.path1	Pepsico2_Contig18178.path1	novel.732	TRINITY_DN17463_c0_g1_i3.path3		TRINITY_DN86212_c0_g1_i1.path1	Pepsico2_Contig583.path2	novel.1495	Pepsico2_Contig6456.path1
TRINITY_DN373_c0_g2_i8.path1	Pepsico2_Contig16947.path1	novel.5310	TRINITY_DN35046_c0_g2_i1.path1		TRINITY_DN10286_c0_g1_i2.path1	novel.7067	Pepsico2_Contig2460.path1	novel.2690
TRINITY_DN23943_c0_g5_i1.path1	Pepsico2_Contig7372.path1	novel.8506	novel.5925		Pepsico1_Contig638.path1	TRINITY_DN4523_c1_g1_i1.path1	TRINITY_DN12913_c0_g1_i2.path3	TRINITY_DN16373_c0_g1_i1.path1
TRINITY_DN13830_c1_g1_i1.path1	novel.4631	TRINITY_DN7178_c0_g2_i1.path1	TRINITY_DN10752_c0_g1_i1.path2		novel.4697	Pepsico2_Contig13792.path1	TRINITY_DN1459_c0_g2_i3.path1	Pepsico2_Contig15498.path1
Pepsico2_Contig16895.path1	TRINITY_DN32286_c0_g2_i1.path1	novel.4360	TRINITY_DN10738_c0_g2_i1.path2		Pepsico2_Contig18181.path1	Pepsico2_Contig19397.path1	Pepsico2_Contig18269.path1	novel.4652
novel.9649	TRINITY_DN17397_c0_g1_i2.path1	TRINITY_DN15718_c0_g1_i3.path1	TRINITY_DN112522_c0_g1_i1.path1		Pepsico2_Contig14182.path1	novel.9736	TRINITY_DN88045_c0_g1_i1.path1	novel.9913
TRINITY_DN6841_c0_g1_i2.path1	TRINITY_DN13217_c1_g1_i1.path1	TRINITY_DN15455_c0_g1_i7.path3	novel.5145		Pepsico2_Contig8195.path1	TRINITY_DN3870_c0_g1_i1.path1	TRINITY_DN373_c0_g2_i8.path1	Pepsico2_Contig18542.path1
TRINITY_DN42170_c0_g1_i1.path1	Pepsico2_Contig4435.path1	TRINITY_DN4172_c0_g1_i16.path1	novel.6949		novel.8750	novel.2183	novel.1553	Pepsico2_Contig11928.path1
TRINITY_DN5621_c0_g3_i1.path1	TRINITY_DN19468_c0_g2_i2.path1	TRINITY_DN35164_c0_g1_i1.path1	TRINITY_DN70178_c0_g1_i1.path1		TRINITY_DN21706_c0_g2_i1.path1	novel.5209	TRINITY_DN13217_c1_g1_i1.path1	TRINITY_DN4456_c0_g2_i10.path1
TRINITY_DN88385_c0_g1_i1.path1	Pepsico2_Contig19917.path4	TRINITY_DN71191_c0_g1_i1.path1	Pepsico2_Contig17052.path1		novel.2005	TRINITY_DN13653_c0_g1_i2.path1	TRINITY_DN4139_c0_g2_i1.path1	TRINITY_DN9519_c0_g1_i4.path1
TRINITY_DN17502_c0_g1_i2.path1	Pepsico1_Contig2677.path1	TRINITY_DN52891_c0_g1_i1.path1	TRINITY_DN38078_c0_g1_i1.path1		novel.3871	TRINITY_DN2365_c0_g1_i15.path2	Pepsico2_Contig14707.path1	TRINITY_DN7271_c0_g1_i3.path1
Pepsico1_Contig1783.path1	novel.732	Pepsico2_Contig11065.path1	TRINITY_DN28245_c0_g2_i1.path2		novel.7783	TRINITY_DN27112_c0_g3_i3.path1	TRINITY_DN27567_c0_g1_i1.path1	TRINITY_DN43686_c0_g1_i1.path1
TRINITY_DN4139_c0_g2_i1.path1	TRINITY_DN34195_c0_g1_i2.path2	TRINITY_DN18616_c0_g1_i4.path1	Pepsico2_Contig19917.path4		Pepsico2_Contig20183.path1	Pepsico2_Contig20183.path1	TRINITY_DN6102_c0_g1_i1.path1	TRINITY_DN1928_c0_g1_i7.path2
novel.4846	TRINITY_DN48202_c0_g1_i2.path1	novel.4924	TRINITY_DN23948_c0_g2_i1.path1		TRINITY_DN39197_c0_g1_i5.path1	TRINITY_DN8148_c0_g1_i1.path1	Pepsico1_Contig1934.path2	TRINITY_DN30113_c1_g1_i1.path1
Pepsico2_Contig18850.path1	novel.7357	novel.8079	novel.1781		TRINITY_DN1148_c0_g1_i2.path1	Pepsico2_Contig18011.path1	novel.3473	Pepsico2_Contig20342.path1
TRINITY_DN6907_c0_g1_i2.path1	novel.5900	TRINITY_DN15272_c0_g3_i1.path1	TRINITY_DN15272_c0_g3_i1.path1		TRINITY_DN5246_c0_g1_i1.path2	TRINITY_DN21428_c0_g1_i3.path1	TRINITY_DN17793_c0_g1_i1.path1	Pepsico2_Contig7466.path1
TRINITY_DN4614_c0_g1_i3.path1	novel.5611	TRINITY_DN10097_c0_g1_i2.path1	Pepsico1_Contig2462.path1		TRINITY_DN99301_c0_g1_i1.path1	novel.10016	TRINITY_DN10738_c0_g1_i1.path1	TRINITY_DN13159_c0_g1_i4.path1
novel.5407	TRINITY_DN2385_c0_g1_i1.path2	Pepsico2_Contig17288.path1	TRINITY_DN71191_c0_g1_i1.path1		TRINITY_DN14495_c0_g1_i2.path2	Pepsico2_Contig15323.path1	TRINITY_DN771_c0_g1_i2.path1	novel.3129
Pepsico1_Contig1880.path1	Pepsico2_Contig18269.path1	Pepsico2_Contig4893.path1	TRINITY_DN22959_c0_g1_i1.path2		Pepsico2_Contig6611.path4	TRINITY_DN5401_c0_g1_i7.path1	TRINITY_DN277_c2_g1_i1.path3	TRINITY_DN7469_c0_g1_i1.path1
TRINITY_DN29271_c0_g1_i2.path3	TRINITY_DN27443_c0_g1_i1.path1	TRINITY_DN2492_c0_g1_i1.path1	TRINITY_DN21916_c0_g1_i1.path1		TRINITY_DN8618_c0_g2_i4.path1	TRINITY_DN7335_c0_g1_i7.path1	TRINITY_DN16303_c0_g1_i4.path1	novel.9764
TRINITY_DN5816_c0_g1_i8.path1	novel.8498	TRINITY_DN3070_c1_g1_i2.path1	Pepsico2_Contig9507.path1		TRINITY_DN7443_c0_g2_i1.path1	TRINITY_DN56186_c0_g1_i1.path2	TRINITY_DN14321_c0_g1_i1.path1	TRINITY_DN16585_c0_g1_i1.path1
TRINITY_DN72_c1_g1_i2.path1	Pepsico2_Contig20286.path1	Pepsico2_Contig7727.path1	Pepsico2_Contig18089.path1		novel.1997	TRINITY_DN19092_c0_g1_i1.path1	Pepsico2_Contig8025.path1	TRINITY_DN23713_c0_g1_i1.path1
Pepsico2_Contig1861.path1	Pepsico2_Contig12625.path1	TRINITY_DN21253_c0_g4_i1.path1	Pepsico1_Contig1025.path1		Pepsico2_Contig8571.path1	TRINITY_DN35046_c0_g2_i1.path1	Pepsico2_Contig12819.path1	novel.4115
TRINITY_DN29865_c0_g1_i1.path1	TRINITY_DN2455_c1_g1_i5.path1	TRINITY_DN38078_c0_g1_i1.path1	TRINITY_DN17793_c0_g3_i2.path2		novel.2764	TRINITY_DN13048_c0_g1_i1.path1	novel.2929	Pepsico2_Contig16793.path1
TRINITY_DN87900_c0_g1_i1.path1	novel.2802	TRINITY_DN5321_c0_g1_i10.path1	Pepsico2_Contig21049.path1		TRINITY_DN4494_c0_g2_i2.path1	Pepsico2_Contig2134.path1	TRINITY_DN9402_c0_g1_i1.path1	TRINITY_DN52891_c0_g1_i1.path1
TRINITY_DN452_c0_g1_i2.path1	Pepsico2_Contig20342.path1	TRINITY_DN13963_c0_g1_i1.path1	Pepsico2_Contig20778.path1		TRINITY_DN11902_c0_g2_i2.path1	TRINITY_DN52160_c0_g1_i1.path1	TRINITY_DN10547_c0_g1_i17.path1	novel.10016
Pepsico2_Contig9173.path1	TRINITY_DN25572_c0_g1_i1.path1	Pepsico2_Contig4567.path1	novel.6264		TRINITY_DN40249_c0_g1_i1.path1	TRINITY_DN11760_c0_g1_i2.path1	novel.307	TRINITY_DN373_c0_g2_i8.path1
Pepsico2_Contig19604.path1	TRINITY_DN5199_c0_g2_i1.path2	TRINITY_DN22959_c0_g1_i1.path2	Pepsico2_Contig17794.path1		TRINITY_DN28064_c0_g2_i2.path1	novel.5600	TRINITY_DN2385_c0_g1_i1.path2	TRINITY_DN28089_c0_g1_i1.path1
novel.8191	Pepsico2_Contig7514.path1	TRINITY_DN4532_c0_g1_i4.path2	TRINITY_DN9712_c0_g3_i2.path1		TRINITY_DN10059_c0_g2_i4.path1	Pepsico2_Contig6161.path1	TRINITY_DN39172_c0_g1_i4.path1	TRINITY_DN4139_c0_g2_i1.path1
Pepsico2_Contig9276.path1	Pepsico1_Contig910.path1	TRINITY_DN40530_c0_g1_i1.path2	novel.8833		TRINITY_DN21717_c0_g1_i1.path1	TRINITY_DN55197_c0_g1_i1.path1	TRINITY_DN8148_c0_g1_i1.path1	TRINITY_DN4288_c0_g1_i3.path1
TRINITY_DN15616_c0_g1_i5.path3	TRINITY_DN8849_c1_g1_i7.path1	novel.5209	TRINITY_DN90920_c0_g1_i1.path1		TRINITY_DN1241_c1_g1_i1.path1	TRINITY_DN7271_c0_g1_i3.path1	TRINITY_DN50072_c0_g1_i1.path1	Pepsico2_Contig16082.path1
TRINITY_DN2854_c0_g1_i1.path1	novel.9457	novel.5478	TRINITY_DN7068_c0_g1_i5.path1		Pepsico2_Contig3005.path1	TRINITY_DN72271_c0_g1_i1.path1	Pepsico2_Contig8849.path1	TRINITY_DN10097_c0_g1_i2.path1
TRINITY_DN79556_c0_g1_i1.path1	novel.9649	Pepsico2_Contig18089.path1	novel.5478		Pepsico2_Contig3671.path1	TRINITY_DN494_c0_g2_i4.path1	novel.2969	TRINITY_DN6057_c0_g1_i2.path1
Pepsico2_Contig7466.path1	TRINITY_DN12548_c0_g1_i3.path2	novel.8294	novel.1553		novel.1417	novel.1630	Pepsico2_Contig779.path1	Pepsico1_Contig7579.path1
novel.2742	TRINITY_DN7469_c0_g1_i1.path1	novel.7477	TRINITY_DN23438_c0_g1_i5.path1		TRINITY_DN6909_c0_g1_i6.path2	TRINITY_DN10738_c0_g1_i1.path1	novel.5611	Pepsico1_Contig3093.path2
Pepsico1_Contig5319.path1	Pepsico1_Contig1934.path1	novel.9974	TRINITY_DN12548_c0_g1_i3.path2		TRINITY_DN1966_c0_g1_i1.path1	Pepsico2_Contig19479.path1	Pepsico2_Contig12122.path1	TRINITY_DN59017_c0_g1_i1.path1
TRINITY_DN9712_c0_g2_i1.path1	TRINITY_DN10097_c0_g1_i2.path1	Pepsico2_Contig2406.path1	TRINITY_DN7125_c0_g1_i8.path1		novel.1630	TRINITY_DN22584_c0_g3_i1.path1	TRINITY_DN35718_c0_g2_i4.path1	novel.5700
TRINITY_DN877_c0_g1_i2.path1	Pepsico1_Contig4678.path1	TRINITY_DN11478_c0_g1_i4.path1	Pepsico1_Contig771.path1		TRINITY_DN24065_c0_g1_i1.path1	Pepsico2_Contig12625.path1	Pepsico2_Contig20063.path1	novel.1076
TRINITY_DN37147_c1_g1_i1.path1	TRINITY_DN100308_c0_g1_i1.path1	Pepsico2_Contig18257.path1	TRINITY_DN14827_c0_g1_i1.path1		Pepsico2_Contig14213.path1	Pepsico2_Contig2029.path1	Pepsico2_Contig4152.path1	Pepsico2_Contig2406.path2
TRINITY_DN2492_c0_g1_i1.path1	Pepsico1_Contig1880.path1	Pepsico2_Contig8879.path1	TRINITY_DN27443_c0_g1_i1.path1		novel.1049	Pepsico2_Contig4663.path1	Pepsico2_Contig17404.path1	Pepsico2_Contig7511.path1
novel.9616	TRINITY_DN1945_c0_g1_i3.path1	TRINITY_DN17793_c0_g3_i2.path2	TRINITY_DN9890_c0_g1_i6.path2		novel.1210	novel.5640	Pepsico1_Contig1029.path1	TRINITY_DN65_c0_g2_i1.path1
novel.2798	novel.9609	TRINITY_DN106297_c0_g1_i1.path1	novel.280		TRINITY_DN12913_c0_g1_i2.path2	Pepsico2_Contig7439.path1	TRINITY_DN18390_c0_g1_i1.path1	TRINITY_DN12913_c0_g1_i2.path3
novel.6977	TRINITY_DN11548_c0_g1_i5.path1	Pepsico2_Contig6288.path1	TRINITY_DN5857_c0_g1_i1.path1		novel.10007	Pepsico1_Contig1543.path1	Pepsico2_Contig4539.path1	novel.4684
novel.7371	Pepsico2_Contig2300.path1	TRINITY_DN14443_c0_g2_i4.path1	Pepsico2_Contig18037.path1		TRINITY_DN31731_c0_g1_i2.path1	Pepsico2_Contig6534.path2	TRINITY_DN452_c0_g1_i2.path1	TRINITY_DN10561_c0_g1_i1.path1
Pepsico2_Contig5650.path1	TRINITY_DN13584_c0_g2_i1.path1	novel.5409	Pepsico2_Contig17842.path1		TRINITY_DN24505_c0_g1_i1.path1	TRINITY_DN52025_c0_g1_i2.path1	TRINITY_DN18616_c0_g1_i4.path1	Pepsico2_Contig2406.path1
TRINITY_DN14061_c0_g2_i1.path2	Pepsico2_Contig14315.path1	TRINITY_DN71899_c0_g1_i2.path1	Pepsico2_Contig19649.path1		TRINITY_DN4119_c1_g1_i4.path1	Pepsico2_Contig2197.path1	TRINITY_DN30113_c1_g1_i1.path1	novel.7636
Pepsico2_Contig16099.path1	TRINITY_DN7915_c0_g2_i2.path1	Pepsico2_Contig19917.path4	TRINITY_DN18491_c0_g1_i3.path1		novel.1927	TRINITY_DN1968_c0_g1_i4.path1	TRINITY_DN6057_c0_g1_i2.path1	novel.2193
novel.9457	TRINITY_DN16303_c0_g1_i4.path1	Pepsico2_Contig17681.path1	TRINITY_DN14443_c0_g2_i4.path1		TRINITY_DN1911_c0_g1_i10.path1	TRINITY_DN109564_c0_g1_i1.path1	TRINITY_DN15272_c0_g2_i1.path1	novel.10140
TRINITY_DN20966_c0_g5_i1.path1	novel.399	novel.8833	Pepsico1_Contig3658.path1		Pepsico2_Contig16525.path1	novel.8257	novel.4846	TRINITY_DN88045_c0_g1_i1.path1
TRINITY_DN44824_c0_g1_i1.path4	TRINITY_DN11593_c1_g1_i7.path2	TRINITY_DN18491_c0_g1_i3.path1	TRINITY_DN27219_c0_g1_i7.path1		TRINITY_DN40757_c0_g1_i2.path1	Pepsico2_Contig8430.path1	novel.2457	TRINITY_DN7178_c0_g2_i1.path1
Pepsico2_Contig17288.path1	TRINITY_DN29865_c0_g1_i1.path2	Pepsico2_Contig2406.path2	TRINITY_DN48507_c0_g1_i1.path2		Pepsico1_Contig22394.path1	TRINITY_DN46389_c0_g1_i1.path1	TRINITY_DN12254_c0_g1_i1.path1	novel.7477
Pepsico2_Contig19497.path1	TRINITY_DN7122_c0_g1_i3.path1	TRINITY_DN55013_c0_g1_i1.path2	Pepsico2_Contig14182.path1		Pepsico1_Contig1515.path1	TRINITY_DN12913_c0_g1_i2.path2	TRINITY_DN106898_c0_g1_i1.path1	TRINITY_DN29620_c0_g2_i1.path1
Pepsico2_Contig6525.path1	Pepsico2_Contig6237.path2	TRINITY_DN249_c1_g1_i1.path1	TRINITY_DN12040_c0_g1_i15.path2		TRINITY_DN20775_c0_g1_i3.path2	Pepsico2_Contig6250.path1	novel.8808	TRINITY_DN5321_c0_g1_i10.path1
TRINITY_DN10166_c0_g1_i1.path1	TRINITY_DN11373_c1_g1_i12.path2	TRINITY_DN10242_c0_g1_i5.path2	TRINITY_DN15718_c0_g1_i3.path1		novel.4975	TRINITY_DN2337_c0_g2_i1.path1	Pepsico1_Contig1543.path1	novel.4631
TRINITY_DN17463_c0_g1_i3.path1	TRINITY_DN24212_c0_g1_i1.path1	Pepsico2_Contig6161.path1	TRINITY_DN13998_c0_g2_i1.path1		novel.7423	TRINITY_DN7656_c0_g1_i1.path3	novel.996	novel.639
TRINITY_DN21916_c0_g1_i1.path1	TRINITY_DN23468_c0_g1_i2.path2	novel.4317	TRINITY_DN16825_c0_g1_i7.path1		novel.8383	Pepsico1_Contig27806.path1	Pepsico2_Contig3085.path1	TRINITY_DN10806_c1_g2_i8.path2
TRINITY_DN16303_c0_g1_i4.path1	TRINITY_DN6390_c0_g1_i3.path1	Pepsico2_Contig4456.path2	TRINITY_DN28930_c0_g2_i2.path1		TRINITY_DN3106_c1_g1_i1.path1	TRINITY_DN82468_c0_g1_i1.path1	novel.9913	novel.8601
TRINITY_DN25384_c0_g1_i1.path2	novel.7111	TRINITY_DN6633_c0_g1_i5.path1	novel.8149		Pepsico1_Contig3638.path2	Pepsico2_Contig20182.path1	novel.2402	TRINITY_DN37282_c0_g1_i1.path2
TRINITY_DN6999_c0_g2_i1.path1	TRINITY_DN26200_c0_g1_i1.path1	TRINITY_DN36478_c0_g1_i3.path1	TRINITY_DN22012_c1_g1_i1.path1		TRINITY_DN16373_c0_g1_i1.path1	TRINITY_DN16373_c0_g1_i1.path1	TRINITY_DN12547_c0_g1_i1.path1	TRINITY_DN35543_c0_g1_i4.path1
Pepsico2_Contig2406.path2	TRINITY_DN23493_c0_g1_i1.path1	TRINITY_DN5857_c0_g1_i1.path1	Pepsico2_Contig6161.path1		TRINITY_DN51929_c0_g1_i1.path1	TRINITY_DN50072_c0_g1_i1.path1	novel.6249	Pepsico2_Contig14991.path2
Pepsico2_Contig1900.path3	novel.9373	TRINITY_DN61085_c0_g1_i1.path1	novel.9649		TRINITY_DN1397_c0_g3_i1.path1	TRINITY_DN9154_c0_g2_i1.path1	Pepsico1_Contig1896.path1	Pepsico1_Contig1543.path1
novel.2116	TRINITY_DN102507_c0_g1_i1.path1	TRINITY_DN41786_c0_g1_i3.path1	novel.4031		TRINITY_DN22245_c0_g1_i1.path1	TRINITY_DN2173_c0_g1_i1.path1	Pepsico2_Contig13724.path1	Pepsico2_Contig19129.path1
TRINITY_DN15073_c0_g1_i2.path1	TRINITY_DN61247_c0_g1_i1.path1	novel.6786	TRINITY_DN32381_c0_g1_i1.path1		novel.7150	Pepsico2_Contig11432.path1	Pepsico2_Contig10688.path1	Pepsico1_Contig501.path1
TRINITY_DN3106_c1_g1_i1.path1	TRINITY_DN14533_c0_g1_i4.path1	TRINITY_DN23908_c0_g1_i2.path1	TRINITY_DN1201_c2_g1_i2.path1		novel.2510	TRINITY_DN8233_c0_g3_i1.path1	TRINITY_DN15198_c0_g1_i2.path2	Pepsico2_Contig17842.path1
novel.7701	novel.8181	TRINITY_DN506_c0_g1_i4.path1	Pepsico2_Contig18011.path1		TRINITY_DN39457_c0_g2_i1.path1	Pepsico2_Contig9370.path1	TRINITY_DN33313_c0_g2_i2.path1	Pepsico2_Contig5308.path1
novel.8005	TRINITY_DN32319_c0_g1_i1.path1	TRINITY_DN19092_c0_g2_i1.path1	TRINITY_DN28145_c0_g3_i2.path1		TRINITY_DN109452_c0_g1_i1.path1	Pepsico2_Contig18112.path1	Pepsico2_Contig7699.path1	TRINITY_DN12547_c0_g1_i1.path1
novel.8998	TRINITY_DN16767_c0_g1_i2.path1	TRINITY_DN10166_c0_g1_i1.path1	novel.4929		Pepsico2_Contig7596.path1	TRINITY_DN13621_c0_g1_i1.path1	Pepsico2_Contig20128.path1	TRINITY_DN14356_c1_g1_i10.path2
Pepsico1_Contig552.path1	TRINITY_DN12040_c0_g1_i15.path2	TRINITY_DN15239_c0_g1_i10.path1	novel.3119		TRINITY_DN31417_c0_g2_i1.path1	TRINITY_DN22030_c0_g1_i4.path1	TRINITY_DN7472_c0_g2_i1.path1	TRINITY_DN20691_c0_g2_i1.path1
TRINITY_DN18468_c0_g1_i6.path1	TRINITY_DN25287_c0_g2_i1.path1	TRINITY_DN44824_c0_g1_i1.path4	TRINITY_DN277_c2_g1_i1.path3		Pepsico2_Contig583.path1	TRINITY_DN80132_c0_g1_i1.path1	Pepsico2_Contig7177.path1	TRINITY_DN16572_c0_g1_i1.path1
novel.8488	Pepsico2_Contig10688.path1	TRINITY_DN8648_c0_g1_i4.path2	TRINITY_DN89139_c0_g1_i1.path1		TRINITY_DN63001_c0_g1_i1.path1	novel.2929	Pepsico2_Contig3845.path1	Pepsico2_Contig9370.path1
TRINITY_DN55440_c0_g1_i1.path1	TRINITY_DN25572_c0_g1_i1.path2	TRINITY_DN27219_c0_g1_i7.path1	novel.7357		TRINITY_DN68934_c0_g1_i1.path1	TRINITY_DN11593_c1_g1_i7.path1	TRINITY_DN78422_c0_g1_i2.path1	Pepsico2_Contig1309.path1
TRINITY_DN11593_c1_g1_i7.path1	Pepsico2_Contig6107.path1	Pepsico2_Contig9556.path1	TRINITY_DN11525_c0_g1_i21.path1		TRINITY_DN21547_c0_g2_i1.path1	TRINITY_DN13294_c1_g1_i1.path1	TRINITY_DN4504_c1_g2_i1.path1	TRINITY_DN5321_c0_g1_i10.path2
Pepsico2_Contig20608.path1	novel.7228	Pepsico2_Contig11300.path1	TRINITY_DN38451_c0_g1_i8.path1		TRINITY_DN13635_c0_g1_i6.path2	TRINITY_DN40249_c0_g1_i1.path1	TRINITY_DN16176_c0_g1_i3.path1	novel.3628
TRINITY_DN7630_c0_g1_i1.path3	novel.263	novel.280	TRINITY_DN55013_c0_g1_i1.path2		novel.3962	novel.3888	TRINITY_DN43808_c0_g4_i1.path1	novel.2291
Pepsico2_Contig20023.path1	TRINITY_DN61085_c0_g1_i1.path1	TRINITY_DN7472_c0_g1_i1.path1	TRINITY_DN11478_c0_g1_i4.path1		TRINITY_DN10587_c0_g2_i2.path1	TRINITY_DN5316_c0_g1_i5.path1	TRINITY_DN26453_c0_g2_i5.path2	Pepsico2_Contig17404.path1
Pepsico2_Contig19669.path1	novel.6249	TRINITY_DN11785_c1_g1_i1.path1	Pepsico2_Contig6611.path2		Pepsico2_Contig12144.path2	Pepsico2_Contig14707.path1	TRINITY_DN21253_c0_g5_i1.path1	Pepsico1_Contig28290.path1
novel.639	novel.1495	TRINITY_DN9712_c0_g3_i2.path1	novel.3680		TRINITY_DN26388_c0_g1_i3.path1	novel.2137	TRINITY_DN2365_c0_g1_i15.path2	TRINITY_DN21706_c0_g1_i3.path2
Pepsico2_Contig3793.path1	TRINITY_DN11163_c1_g2_i1.path1	TRINITY_DN10547_c0_g1_i17.path1	novel.6846		TRINITY_DN80397_c0_g1_i1.path1	TRINITY_DN34756_c0_g1_i5.path1	novel.2448	novel.5643
Pepsico2_Contig5904.path1	TRINITY_DN32553_c0_g1_i1.path1	TRINITY_DN70178_c0_g1_i1.path1	TRINITY_DN6633_c0_g1_i5.path1		novel.9288	novel.5310	Pepsico2_Contig6534.path2	novel.2969
Pepsico2_Contig4435.path1	Pepsico2_Contig17958.path1	TRINITY_DN22012_c1_g1_i1.path1	TRINITY_DN10301_c1_g1_i3.path1		TRINITY_DN43050_c0_g1_i1.path1	TRINITY_DN29271_c0_g1_i2.path3	novel.1627	TRINITY_DN3070_c1_g1_i2.path2
TRINITY_DN36731_c0_g1_i1.path1	novel.1633	TRINITY_DN13657_c0_g1_i2.path1	Pepsico2_Contig4456.path2		novel.9961	novel.3361	Pepsico2_Contig971.path1	Pepsico2_Contig20182.path1
TRINITY_DN16702_c0_g1_i1.path1	Pepsico2_Contig9556.path1	Pepsico1_Contig2444.path1	novel.5461		TRINITY_DN32977_c0_g1_i1.path1	TRINITY_DN7311_c0_g1_i1.path1	TRINITY_DN7964_c0_g1_i2.path1	novel.2138
TRINITY_DN12758_c2_g2_i1.path1	TRINITY_DN2414_c1_g1_i3.path1	TRINITY_DN14827_c0_g1_i1.path1	TRINITY_DN32319_c0_g1_i1.path1		novel.7729	TRINITY_DN5109_c0_g1_i2.path1	TRINITY_DN4975_c0_g1_i3.path2	TRINITY_DN2492_c0_g1_i1.path1
Pepsico1_Contig5607.path1	novel.2226	Pepsico2_Contig19649.path1	TRINITY_DN19177_c0_g1_i1.path1		TRINITY_DN2852_c0_g1_i3.path2	Pepsico2_Contig10148.path1	TRINITY_DN15240_c0_g1_i3.path1	TRINITY_DN5816_c1_g1_i1.path1
TRINITY_DN41957_c0_g1_i1.path1	TRINITY_DN44824_c0_g1_i1.path4	TRINITY_DN22741_c0_g2_i2.path1	novel.1495		novel.6139	Pepsico2_Contig5930.path2	TRINITY_DN23713_c0_g1_i1.path1	TRINITY_DN27219_c0_g1_i7.path1
TRINITY_DN13217_c1_g1_i1.path1	TRINITY_DN16373_c0_g1_i1.path1	Pepsico2_Contig13724.path2	TRINITY_DN7178_c0_g2_i1.path1		TRINITY_DN23596_c0_g1_i3.path1	novel.10172	Pepsico2_Contig18011.path1	TRINITY_DN25384_c0_g2_i1.path3
TRINITY_DN3870_c0_g1_i1.path1	Pepsico2_Contig1759.path1	TRINITY_DN22425_c0_g1_i1.path1	novel.1820		novel.5925	TRINITY_DN10620_c0_g2_i1.path1	TRINITY_DN7412_c0_g1_i1.path1	novel.9659
Pepsico1_Contig910.path1	novel.3628	TRINITY_DN19392_c0_g2_i1.path1	Pepsico2_Contig12308.path2		Pepsico2_Contig11017.path2	TRINITY_DN3567_c0_g2_i2.path1	TRINITY_DN11902_c0_g2_i2.path1	TRINITY_DN32994_c0_g1_i1.path1
TRINITY_DN1040_c0_g1_i1.path1	novel.2	Pepsico2_Contig9173.path1	TRINITY_DN5938_c0_g3_i1.path1		TRINITY_DN3489_c0_g1_i2.path1	TRINITY_DN6065_c0_g1_i2.path1	Pepsico1_Contig2049.path1	Pepsico2_Contig971.path1
Pepsico2_Contig660.path1	TRINITY_DN9693_c0_g1_i7.path1	TRINITY_DN16522_c0_g1_i3.path1	Pepsico2_Contig19106.path1		TRINITY_DN82468_c0_g1_i1.path1	novel.8144	TRINITY_DN2098_c0_g2_i1.path1	TRINITY_DN1019_c0_g2_i1.path1
novel.2119	TRINITY_DN11150_c1_g2_i1.path1	TRINITY_DN37359_c0_g1_i1.path3	TRINITY_DN15073_c0_g1_i2.path1		TRINITY_DN18481_c0_g1_i2.path1	TRINITY_DN13715_c0_g1_i1.path1	Pepsico2_Contig7511.path1	novel.1553
TRINITY_DN4502_c0_g2_i1.path1	TRINITY_DN4714_c0_g1_i9.path1	Pepsico1_Contig2510.path2	TRINITY_DN249_c1_g1_i1.path1		Pepsico2_Contig11016.path1	Pepsico2_Contig11330.path1	TRINITY_DN5816_c0_g1_i8.path1	TRINITY_DN23438_c0_g1_i5.path1
Pepsico1_Contig4678.path1	novel.4904	Pepsico2_Contig4732.path1	novel.4346		TRINITY_DN24907_c0_g1_i4.path1	Pepsico1_Contig1934.path2	TRINITY_DN4456_c0_g2_i10.path2	TRINITY_DN4502_c2_g1_i1.path1
TRINITY_DN11349_c0_g1_i2.path2	Pepsico2_Contig9276.path1	novel.1495	Pepsico1_Contig865.path1		TRINITY_DN18488_c0_g1_i1.path1	Pepsico2_Contig7466.path1	TRINITY_DN3634_c0_g1_i4.path2	TRINITY_DN3174_c1_g1_i2.path1
Pepsico2_Contig8062.path1	TRINITY_DN16702_c0_g1_i1.path1	Pepsico2_Contig18183.path1	TRINITY_DN22741_c0_g2_i2.path1		TRINITY_DN21191_c0_g1_i1.path1	novel.8642	Pepsico2_Contig1842.path1	TRINITY_DN34621_c0_g1_i1.path2
TRINITY_DN2720_c0_g1_i2.path1	TRINITY_DN16015_c0_g1_i1.path1	TRINITY_DN59954_c0_g1_i3.path1	Pepsico2_Contig5727.path3		TRINITY_DN14050_c0_g1_i4.path1	TRINITY_DN63863_c0_g1_i1.path1	novel.2855	Pepsico2_Contig3722.path1
Pepsico2_Contig8879.path1	TRINITY_DN50781_c0_g1_i1.path1	TRINITY_DN7127_c0_g2_i6.path1	novel.1098		TRINITY_DN15952_c1_g1_i2.path2	Pepsico1_Contig1479.path1	novel.2550	Pepsico2_Contig18011.path1
TRINITY_DN6488_c0_g1_i1.path3	Pepsico2_Contig7727.path1	Pepsico2_Contig14627.path1	Pepsico2_Contig15659.path1		TRINITY_DN15885_c0_g1_i1.path2	Pepsico2_Contig13304.path1	novel.10016	TRINITY_DN18091_c0_g1_i1.path1
novel.8103	novel.2160	TRINITY_DN17829_c0_g1_i1.path1	Pepsico1_Contig28290.path1		TRINITY_DN80635_c0_g1_i1.path1	Pepsico2_Contig3085.path1	TRINITY_DN21428_c0_g1_i3.path1	novel.1622
Pepsico2_Contig12299.path1	TRINITY_DN41080_c0_g1_i1.path1	TRINITY_DN49146_c0_g1_i1.path2	Pepsico2_Contig4411.path1		Pepsico2_Contig11017.path1	Pepsico2_Contig17712.path1	Pepsico2_Contig9477.path1	TRINITY_DN33307_c0_g1_i2.path1
novel.8861	Pepsico2_Contig7773.path1	TRINITY_DN5904_c0_g1_i3.path1	novel.2226		Pepsico2_Contig4567.path1	novel.996	TRINITY_DN236_c0_g1_i2.path1	Pepsico1_Contig1029.path1
Pepsico2_Contig18182.path1	Pepsico2_Contig4961.path1	TRINITY_DN32319_c0_g1_i1.path1	Pepsico2_Contig11300.path1		novel.9110	Pepsico1_Contig638.path1	Pepsico2_Contig17067.path1	TRINITY_DN5355_c1_g1_i3.path1
TRINITY_DN16585_c0_g1_i1.path1	novel.4758	TRINITY_DN16825_c0_g1_i7.path1	TRINITY_DN931_c0_g2_i2.path1		TRINITY_DN74489_c0_g1_i1.path1	Pepsico2_Contig10688.path1	TRINITY_DN5010_c0_g1_i1.path1	Pepsico2_Contig7175.path1
TRINITY_DN35046_c0_g2_i1.path1	TRINITY_DN3707_c0_g1_i10.path2	TRINITY_DN2337_c0_g1_i6.path1	Pepsico2_Contig17718.path1		Pepsico2_Contig12502.path1	TRINITY_DN5938_c0_g3_i1.path1	Pepsico2_Contig13792.path1	novel.3143
TRINITY_DN1599_c1_g1_i3.path1	Pepsico1_Contig1025.path1	Pepsico1_Contig3093.path2	Pepsico2_Contig638.path2		Pepsico2_Contig20515.path1	TRINITY_DN5355_c1_g1_i3.path1	TRINITY_DN15500_c0_g3_i1.path1	Pepsico1_Contig1511.path1
TRINITY_DN7469_c0_g1_i1.path1	TRINITY_DN97533_c0_g1_i1.path1	TRINITY_DN16421_c0_g1_i9.path3	TRINITY_DN19392_c0_g2_i1.path1		TRINITY_DN25378_c0_g1_i1.path1	novel.5385	Pepsico2_Contig18065.path1	Pepsico2_Contig2152.path1
Pepsico1_Contig3866.path1	novel.9616	Pepsico2_Contig6148.path2	TRINITY_DN15455_c0_g1_i7.path3		Pepsico2_Contig4658.path1	novel.1958	TRINITY_DN37282_c0_g1_i1.path2	TRINITY_DN23943_c0_g5_i1.path1
Pepsico1_Contig71.path1	TRINITY_DN42186_c0_g2_i1.path1	TRINITY_DN108824_c0_g1_i1.path1	TRINITY_DN648_c1_g1_i8.path2		TRINITY_DN23754_c0_g3_i1.path1	TRINITY_DN9701_c0_g1_i1.path1	TRINITY_DN10451_c0_g1_i2.path1	Pepsico2_Contig11300.path1
TRINITY_DN32389_c0_g1_i1.path1	TRINITY_DN27219_c0_g1_i7.path1	TRINITY_DN112522_c0_g1_i1.path1	TRINITY_DN310_c1_g1_i3.path1		TRINITY_DN19722_c0_g1_i1.path1	TRINITY_DN6139_c0_g2_i2.path1	TRINITY_DN65_c0_g2_i1.path1	Pepsico2_Contig6534.path2
TRINITY_DN13705_c0_g3_i1.path2	novel.4694	TRINITY_DN16495_c0_g1_i1.path2	Pepsico2_Contig3659.path1		novel.6689	TRINITY_DN5199_c0_g2_i1.path2	Pepsico1_Contig14950.path1	novel.996
Pepsico2_Contig4421.path1	TRINITY_DN2720_c0_g1_i2.path1	Pepsico1_Contig6523.path1	TRINITY_DN16421_c0_g1_i9.path3		Pepsico2_Contig14932.path1	TRINITY_DN51801_c0_g3_i2.path1	novel.1011	Pepsico2_Contig7439.path1
Pepsico2_Contig1496.path1	TRINITY_DN96580_c0_g1_i1.path1	TRINITY_DN14061_c0_g2_i1.path2	TRINITY_DN5174_c1_g1_i2.path1		TRINITY_DN55197_c0_g1_i1.path1	TRINITY_DN11902_c0_g2_i2.path1	novel.4115	TRINITY_DN18616_c0_g1_i4.path1
Pepsico2_Contig13209.path1	novel.2234	TRINITY_DN6751_c0_g1_i5.path1	TRINITY_DN52537_c0_g1_i1.path1		TRINITY_DN10190_c0_g1_i5.path1	TRINITY_DN17397_c0_g1_i2.path1	Pepsico2_Contig12625.path1	novel.5925
TRINITY_DN50612_c0_g1_i1.path1	Pepsico2_Contig7794.path1	TRINITY_DN4515_c0_g1_i17.path2	Pepsico2_Contig7511.path1		TRINITY_DN6230_c1_g1_i1.path2	TRINITY_DN89105_c0_g1_i1.path1	TRINITY_DN22560_c0_g1_i4.path1	TRINITY_DN4879_c0_g2_i1.path1
TRINITY_DN16513_c0_g2_i1.path1	Pepsico2_Contig15617.path1	Pepsico2_Contig1104.path1	novel.7286		TRINITY_DN79675_c0_g1_i1.path1	novel.4381	TRINITY_DN9494_c0_g1_i2.path1	Pepsico2_Contig6161.path1
TRINITY_DN18638_c0_g1_i1.path1	TRINITY_DN14356_c1_g1_i10.path2	novel.4542	novel.8235		TRINITY_DN6909_c0_g1_i6.path1	novel.3012	TRINITY_DN95125_c0_g1_i1.path1	novel.8861
TRINITY_DN43227_c0_g1_i2.path1	novel.7067	Pepsico2_Contig18011.path1	Pepsico1_Contig701.path2		Pepsico2_Contig18121.path1	TRINITY_DN10928_c0_g1_i7.path2	TRINITY_DN6909_c0_g1_i6.path2	TRINITY_DN15198_c0_g3_i1.path1
TRINITY_DN14541_c0_g1_i1.path2	TRINITY_DN35046_c0_g2_i1.path1	TRINITY_DN35046_c0_g2_i1.path1	TRINITY_DN20133_c0_g1_i3.path1		TRINITY_DN11083_c0_g1_i15.path1	TRINITY_DN2337_c0_g1_i6.path1	TRINITY_DN19166_c0_g1_i6.path1	TRINITY_DN96580_c0_g1_i1.path1
TRINITY_DN7127_c0_g2_i6.path2	novel.6126	TRINITY_DN17463_c0_g1_i3.path3	TRINITY_DN582_c2_g1_i6.path1		TRINITY_DN78411_c0_g1_i1.path1	novel.1959	novel.10240	Pepsico2_Contig3085.path1
TRINITY_DN8939_c0_g1_i1.path1	novel.6977	Pepsico2_Contig5727.path3	TRINITY_DN14061_c0_g2_i1.path2		TRINITY_DN15377_c0_g1_i2.path1	novel.5258	TRINITY_DN10097_c0_g1_i2.path1	TRINITY_DN3489_c0_g1_i2.path1
TRINITY_DN10612_c0_g1_i14.path1	TRINITY_DN26141_c0_g2_i1.path1	TRINITY_DN25012_c0_g2_i2.path1	TRINITY_DN21572_c0_g1_i1.path1		TRINITY_DN91407_c0_g1_i1.path1	TRINITY_DN10837_c0_g1_i1.path1	Pepsico2_Contig1104.path1	Pepsico2_Contig17718.path1
Pepsico2_Contig20048.path1	Pepsico2_Contig9970.path1	Pepsico2_Contig15617.path1	novel.7021		TRINITY_DN98960_c0_g1_i1.path1	novel.8861	novel.3361	novel.9457
TRINITY_DN21016_c0_g1_i1.path1	TRINITY_DN9291_c0_g1_i1.path1	TRINITY_DN11693_c2_g1_i1.path1	novel.2816		Pepsico2_Contig13004.path1	TRINITY_DN27567_c0_g1_i1.path1	Pepsico2_Contig16992.path1	Pepsico1_Contig3307.path1
TRINITY_DN14014_c0_g3_i1.path1	Pepsico2_Contig9173.path1	novel.1576	novel.2760		TRINITY_DN76151_c0_g1_i1.path1	Pepsico2_Contig6525.path1	Pepsico1_Contig1029.path2	TRINITY_DN10094_c0_g3_i1.path1
TRINITY_DN4504_c1_g1_i2.path2	TRINITY_DN80132_c0_g1_i1.path1	novel.9227	TRINITY_DN6979_c0_g1_i6.path1		novel.1756	TRINITY_DN7122_c0_g1_i3.path1	TRINITY_DN89105_c0_g1_i1.path1	TRINITY_DN10752_c0_g1_i1.path1
Pepsico2_Contig20393.path1	novel.6460	Pepsico2_Contig9507.path1	TRINITY_DN4027_c0_g5_i1.path1		Pepsico1_Contig2161.path2	novel.9616	TRINITY_DN27295_c0_g1_i1.path1	TRINITY_DN2761_c0_g2_i3.path1
Pepsico2_Contig4567.path1	Pepsico2_Contig17149.path1	TRINITY_DN8639_c1_g1_i2.path1	TRINITY_DN71899_c0_g1_i2.path1		TRINITY_DN11951_c0_g1_i1.path1	Pepsico2_Contig9102.path1	TRINITY_DN8392_c0_g1_i2.path1	novel.2448
Pepsico2_Contig7984.path2	novel.8548	TRINITY_DN19468_c0_g2_i2.path1	TRINITY_DN3853_c0_g1_i1.path1		TRINITY_DN15598_c0_g1_i4.path4	novel.8779	TRINITY_DN2098_c1_g1_i5.path1	novel.1495
TRINITY_DN9569_c0_g1_i3.path3	TRINITY_DN15198_c0_g1_i2.path2	novel.9373	TRINITY_DN5401_c0_g1_i7.path1		TRINITY_DN17359_c0_g5_i1.path2	Pepsico2_Contig2197.path2	novel.1031	novel.6254
TRINITY_DN61085_c0_g1_i1.path1	novel.2466	TRINITY_DN320_c2_g1_i1.path2	TRINITY_DN11687_c0_g1_i1.path1		TRINITY_DN97221_c0_g1_i1.path1	TRINITY_DN14050_c0_g1_i4.path1	Pepsico2_Contig11248.path1	TRINITY_DN10782_c0_g1_i1.path1
TRINITY_DN97339_c0_g1_i1.path1	novel.51	TRINITY_DN2185_c0_g1_i8.path1	Pepsico2_Contig3536.path1		novel.5438	TRINITY_DN102574_c0_g1_i1.path1	TRINITY_DN2337_c0_g2_i1.path1	Pepsico2_Contig18357.path1
novel.5499	TRINITY_DN10094_c0_g3_i1.path1	TRINITY_DN5942_c1_g1_i4.path2	novel.5863		Pepsico1_Contig35521.path1	TRINITY_DN8652_c0_g1_i6.path1	novel.3212	TRINITY_DN13217_c0_g1_i1.path1
Pepsico1_Contig854.path1	TRINITY_DN18292_c0_g3_i1.path1	TRINITY_DN7127_c0_g2_i6.path2	Pepsico2_Contig14627.path1		TRINITY_DN50836_c0_g1_i1.path1	TRINITY_DN34221_c0_g1_i1.path2	Pepsico1_Contig2677.path1	Pepsico2_Contig13724.path1
Pepsico2_Contig4818.path1	TRINITY_DN36478_c0_g1_i3.path1	Pepsico1_Contig1873.path2	Pepsico2_Contig19854.path2		Pepsico2_Contig19380.path1	Pepsico2_Contig14438.path1	TRINITY_DN5816_c1_g1_i1.path1	TRINITY_DN12536_c0_g1_i4.path2
Pepsico2_Contig1759.path1	Pepsico2_Contig7511.path1	TRINITY_DN9568_c0_g1_i5.path1	Pepsico1_Contig6507.path1		Pepsico2_Contig7177.path1	TRINITY_DN16351_c0_g1_i2.path1	TRINITY_DN69825_c0_g1_i1.path1	TRINITY_DN22741_c0_g2_i2.path1
TRINITY_DN42615_c0_g1_i3.path1	Pepsico2_Contig2406.path1	novel.3594	novel.826		Pepsico2_Contig19114.path1	Pepsico2_Contig12122.path1	novel.4995	TRINITY_DN3394_c1_g1_i3.path1
TRINITY_DN15952_c1_g1_i2.path2	TRINITY_DN25384_c0_g1_i1.path2	TRINITY_DN12929_c0_g1_i1.path2	novel.828		TRINITY_DN10853_c0_g1_i1.path1	novel.2935	TRINITY_DN21016_c0_g1_i1.path1	Pepsico2_Contig10648.path1
TRINITY_DN7307_c0_g1_i1.path1	Pepsico2_Contig6539.path1	Pepsico2_Contig7466.path1	Pepsico2_Contig1104.path1		Pepsico2_Contig1434.path1	Pepsico2_Contig12058.path1	novel.2183	Pepsico1_Contig196.path1
TRINITY_DN21357_c0_g1_i1.path1	TRINITY_DN21572_c0_g1_i1.path1	Pepsico2_Contig20779.path1	TRINITY_DN4879_c0_g2_i1.path1		TRINITY_DN24886_c0_g1_i8.path1	Pepsico1_Contig1029.path1	TRINITY_DN13254_c1_g1_i1.path1	TRINITY_DN9693_c0_g1_i7.path1
Pepsico2_Contig6624.path1	TRINITY_DN13350_c0_g1_i1.path1	TRINITY_DN19031_c0_g2_i1.path1	novel.3360		Pepsico2_Contig20048.path1	novel.5681	Pepsico2_Contig14530.path1	TRINITY_DN106240_c0_g1_i1.path1
TRINITY_DN25100_c0_g2_i2.path1	TRINITY_DN2098_c0_g2_i1.path1	Pepsico1_Contig473.path1	TRINITY_DN9120_c1_g1_i2.path1		novel.10172	TRINITY_DN99301_c0_g1_i1.path1	TRINITY_DN2414_c0_g2_i1.path1	TRINITY_DN19092_c0_g1_i1.path1
Pepsico2_Contig13651.path1	TRINITY_DN37508_c0_g1_i2.path1	Pepsico2_Contig4411.path1	Pepsico2_Contig7727.path1		TRINITY_DN35046_c0_g2_i1.path1	TRINITY_DN19173_c0_g1_i3.path2	TRINITY_DN13635_c0_g1_i6.path2	TRINITY_DN22560_c0_g1_i4.path1
TRINITY_DN39671_c0_g1_i1.path1	TRINITY_DN26262_c0_g1_i1.path1	TRINITY_DN3161_c0_g1_i1.path1	novel.7636		TRINITY_DN6065_c0_g3_i1.path1	TRINITY_DN97533_c0_g1_i1.path1	TRINITY_DN15272_c0_g3_i1.path1	TRINITY_DN8645_c0_g1_i16.path1
Pepsico2_Contig7827.path1	TRINITY_DN8820_c0_g1_i1.path1	TRINITY_DN12040_c0_g1_i15.path2	TRINITY_DN14212_c0_g1_i1.path1		TRINITY_DN1105_c1_g2_i1.path1	TRINITY_DN45570_c0_g1_i1.path1	TRINITY_DN2761_c0_g2_i3.path1	TRINITY_DN4172_c0_g1_i16.path1
TRINITY_DN19468_c0_g2_i2.path1	TRINITY_DN3634_c0_g1_i4.path2	TRINITY_DN26074_c0_g1_i1.path1	TRINITY_DN5816_c1_g1_i1.path1		novel.6219	TRINITY_DN13490_c0_g1_i5.path1	TRINITY_DN10612_c0_g1_i14.path1	TRINITY_DN18488_c0_g1_i1.path1
Pepsico2_Contig4262.path1	TRINITY_DN4523_c1_g1_i1.path1	Pepsico2_Contig8062.path1	TRINITY_DN5933_c0_g1_i1.path1		Pepsico2_Contig1448.path1	TRINITY_DN27955_c0_g1_i1.path1	TRINITY_DN15455_c0_g1_i7.path2	Pepsico1_Contig2378.path2
TRINITY_DN26611_c0_g2_i1.path1	novel.5925	novel.2802	Pepsico1_Contig5337.path1		novel.7515	Pepsico2_Contig6846.path1	TRINITY_DN18264_c0_g1_i3.path1	novel.9609
Pepsico2_Contig20227.path1	novel.7729	TRINITY_DN5816_c1_g1_i1.path1	TRINITY_DN12548_c0_g1_i3.path1		Pepsico2_Contig8532.path1	Pepsico1_Contig7138.path1	Pepsico2_Contig15312.path1	TRINITY_DN2414_c0_g2_i1.path1
TRINITY_DN98936_c0_g1_i1.path1	TRINITY_DN4879_c0_g2_i1.path1	Pepsico2_Contig7869.path1	Pepsico2_Contig17052.path2		TRINITY_DN10547_c0_g1_i17.path1	novel.1781	novel.7472	TRINITY_DN37508_c0_g1_i2.path1
TRINITY_DN25302_c0_g3_i2.path1	TRINITY_DN618_c0_g1_i2.path1	TRINITY_DN5401_c0_g1_i7.path1	Pepsico2_Contig8757.path1		TRINITY_DN13217_c0_g1_i1.path1	novel.7729	TRINITY_DN9712_c0_g3_i2.path1	Pepsico1_Contig195.path1
TRINITY_DN38122_c0_g1_i1.path1	TRINITY_DN28145_c0_g3_i2.path1	Pepsico2_Contig16776.path1	TRINITY_DN10806_c1_g3_i2.path1		TRINITY_DN11593_c1_g1_i7.path1	Pepsico2_Contig5887.path1	novel.1849	novel.4252
TRINITY_DN14356_c1_g1_i10.path2	TRINITY_DN11785_c1_g1_i1.path1	Pepsico2_Contig7843.path1	Pepsico2_Contig4732.path1		TRINITY_DN88261_c0_g1_i1.path1	TRINITY_DN1543_c0_g1_i1.path2	TRINITY_DN15500_c0_g3_i1.path2	TRINITY_DN2098_c0_g2_i1.path1
Pepsico2_Contig6161.path1	Pepsico2_Contig20393.path1	TRINITY_DN3163_c0_g1_i6.path1	novel.6927		TRINITY_DN19173_c0_g1_i3.path2	TRINITY_DN2098_c0_g2_i1.path1	TRINITY_DN7271_c0_g1_i3.path1	novel.280
TRINITY_DN107312_c0_g1_i1.path1	Pepsico2_Contig17571.path2	Pepsico2_Contig12375.path1	novel.6460		Pepsico2_Contig18542.path1	TRINITY_DN9650_c0_g2_i1.path1	Pepsico2_Contig18112.path1	novel.5863
TRINITY_DN23077_c0_g2_i1.path1	novel.7441	novel.3547	novel.8916		TRINITY_DN9750_c0_g1_i6.path1	TRINITY_DN70178_c0_g1_i1.path1	Pepsico2_Contig13004.path1	TRINITY_DN2414_c1_g1_i3.path1
novel.2693	TRINITY_DN10826_c0_g1_i2.path1	TRINITY_DN5942_c1_g1_i4.path1	TRINITY_DN7127_c0_g2_i6.path1		novel.4363	TRINITY_DN22560_c0_g1_i4.path1	novel.1260	TRINITY_DN50072_c0_g1_i1.path1
Pepsico1_Contig1934.path1	TRINITY_DN23496_c0_g1_i2.path2	Pepsico1_Contig32793.path1	TRINITY_DN39335_c0_g1_i1.path1		TRINITY_DN32683_c0_g1_i1.path1	Pepsico2_Contig8849.path1	TRINITY_DN16767_c0_g1_i2.path1	Pepsico2_Contig20128.path1
Pepsico1_Contig28290.path1	TRINITY_DN79208_c0_g1_i1.path1	novel.9447	novel.5132		TRINITY_DN3623_c1_g1_i3.path1	TRINITY_DN37640_c0_g1_i1.path1	novel.9844	TRINITY_DN7223_c0_g1_i5.path1
TRINITY_DN494_c0_g2_i4.path1	TRINITY_DN9154_c0_g2_i1.path1	TRINITY_DN4606_c0_g2_i1.path1	TRINITY_DN2414_c1_g1_i3.path1		TRINITY_DN89147_c0_g1_i1.path1	TRINITY_DN46714_c0_g1_i1.path1	TRINITY_DN16298_c0_g2_i1.path1	Pepsico2_Contig20063.path1
TRINITY_DN10620_c0_g3_i1.path1	TRINITY_DN16286_c0_g1_i4.path1	TRINITY_DN12548_c0_g1_i3.path1	novel.7569		Pepsico1_Contig1670.path1	TRINITY_DN13830_c1_g1_i1.path1	TRINITY_DN6633_c0_g1_i5.path2	Pepsico2_Contig19393.path1
TRINITY_DN75967_c0_g1_i1.path1	TRINITY_DN22077_c0_g1_i12.path2	TRINITY_DN33313_c0_g2_i2.path1	TRINITY_DN43546_c0_g2_i1.path1		novel.3143	Pepsico2_Contig18189.path1	TRINITY_DN22425_c0_g1_i1.path1	Pepsico2_Contig8136.path1
novel.5132	TRINITY_DN16045_c1_g1_i4.path1	Pepsico2_Contig17795.path1	TRINITY_DN60652_c0_g1_i1.path1		TRINITY_DN31707_c0_g3_i9.path1	Pepsico1_Contig28290.path1	Pepsico2_Contig2718.path1	novel.5209
TRINITY_DN33151_c0_g1_i1.path1	Pepsico2_Contig17803.path1	novel.10546	TRINITY_DN12207_c0_g1_i1.path1		novel.1447	TRINITY_DN3106_c0_g2_i1.path1	Pepsico2_Contig8305.path1	Pepsico2_Contig2134.path1
TRINITY_DN4504_c1_g2_i1.path1	TRINITY_DN13830_c1_g1_i1.path1	TRINITY_DN28245_c0_g2_i1.path2	Pepsico2_Contig17681.path1		novel.857	TRINITY_DN24212_c0_g1_i1.path1	TRINITY_DN8233_c0_g3_i1.path1	Pepsico2_Contig4152.path1
TRINITY_DN79208_c0_g1_i1.path1	TRINITY_DN606_c0_g1_i1.path1	TRINITY_DN2414_c1_g1_i3.path1	Pepsico2_Contig7466.path1		TRINITY_DN108478_c0_g1_i1.path4	TRINITY_DN249_c1_g1_i1.path1	Pepsico2_Contig14825.path1	TRINITY_DN18638_c0_g3_i1.path1
Pepsico2_Contig19649.path1	TRINITY_DN9712_c0_g3_i2.path1	TRINITY_DN6929_c1_g1_i4.path1	Pepsico2_Contig1309.path1		Pepsico2_Contig13838.path2	TRINITY_DN24065_c0_g1_i1.path1	TRINITY_DN3489_c0_g1_i2.path1	novel.2402
Pepsico1_Contig4877.path1	novel.4924	TRINITY_DN3634_c0_g1_i4.path1	TRINITY_DN14202_c0_g3_i2.path1		TRINITY_DN20597_c0_g1_i1.path1	novel.2651	novel.4101	TRINITY_DN5721_c0_g1_i1.path1
TRINITY_DN743_c0_g1_i3.path2	TRINITY_DN11128_c0_g1_i8.path1	Pepsico2_Contig19350.path1	TRINITY_DN26074_c0_g1_i1.path1		TRINITY_DN71450_c0_g1_i1.path1	TRINITY_DN30706_c0_g1_i2.path1	TRINITY_DN14533_c0_g1_i4.path1	novel.2184
Pepsico2_Contig13724.path2	novel.4450	novel.3043	TRINITY_DN79603_c0_g1_i1.path1		TRINITY_DN37640_c0_g1_i1.path1	TRINITY_DN27062_c0_g1_i1.path1	Pepsico2_Contig7439.path1	TRINITY_DN73578_c0_g1_i1.path1
novel.1598	Pepsico2_Contig19859.path1	TRINITY_DN9385_c2_g1_i1.path1	TRINITY_DN7223_c0_g1_i5.path1		Pepsico1_Contig27291.path1	TRINITY_DN40354_c0_g1_i2.path1	TRINITY_DN15272_c1_g1_i1.path1	novel.2802
TRINITY_DN94140_c0_g1_i1.path2	TRINITY_DN652_c0_g1_i1.path1	Pepsico2_Contig16082.path1	TRINITY_DN2337_c0_g1_i6.path1		TRINITY_DN17530_c0_g1_i1.path3	Pepsico2_Contig7699.path1	TRINITY_DN18161_c0_g1_i10.path1	novel.1630
Pepsico1_Contig5243.path1	TRINITY_DN1139_c0_g1_i1.path1	TRINITY_DN6390_c0_g1_i3.path1	TRINITY_DN16614_c0_g2_i1.path1		TRINITY_DN2365_c0_g1_i15.path2	TRINITY_DN7127_c0_g2_i6.path1	TRINITY_DN28038_c0_g1_i1.path1	Pepsico2_Contig6417.path1
TRINITY_DN43131_c0_g1_i2.path1	Pepsico2_Contig18065.path1	TRINITY_DN15455_c0_g1_i7.path1	novel.2116		Pepsico2_Contig14825.path1	Pepsico2_Contig5200.path1	Pepsico2_Contig19129.path1	Pepsico2_Contig6528.path1
TRINITY_DN8280_c0_g2_i1.path2	novel.6254	Pepsico1_Contig1934.path1	novel.1005		TRINITY_DN16244_c0_g1_i2.path1	Pepsico2_Contig17986.path1	TRINITY_DN35580_c0_g1_i6.path1	novel.9736
novel.2454	Pepsico2_Contig8879.path1	novel.9649	TRINITY_DN31623_c1_g1_i1.path1		TRINITY_DN7279_c0_g1_i1.path1	Pepsico2_Contig14292.path1	TRINITY_DN16228_c0_g1_i5.path1	novel.1837
TRINITY_DN21996_c0_g1_i1.path1	novel.5189	TRINITY_DN10738_c0_g2_i1.path2	TRINITY_DN20691_c0_g2_i1.path1		Pepsico2_Contig13626.path1	Pepsico2_Contig11300.path1	novel.10101	Pepsico2_Contig17058.path1
novel.9447	TRINITY_DN26074_c0_g1_i1.path1	TRINITY_DN931_c0_g2_i2.path1	novel.6006		TRINITY_DN8122_c0_g1_i5.path1	Pepsico2_Contig9464.path1	TRINITY_DN28234_c0_g2_i1.path2	TRINITY_DN28930_c0_g2_i2.path1
Pepsico2_Contig11507.path1	TRINITY_DN5938_c0_g3_i1.path1	Pepsico2_Contig17718.path1	TRINITY_DN29886_c0_g2_i1.path1		Pepsico2_Contig3750.path1	Pepsico1_Contig2677.path1	TRINITY_DN4132_c0_g2_i1.path1	Pepsico2_Contig3516.path1
TRINITY_DN34253_c0_g1_i1.path1	Pepsico2_Contig19397.path1	Pepsico2_Contig12692.path4	TRINITY_DN29620_c0_g2_i1.path1		TRINITY_DN310_c1_g1_i3.path1	novel.9333	Pepsico1_Contig3669.path1	TRINITY_DN60652_c0_g1_i1.path1
TRINITY_DN43440_c0_g1_i1.path1	TRINITY_DN15455_c0_g1_i7.path3	novel.4538	TRINITY_DN18616_c0_g1_i4.path1		TRINITY_DN10100_c0_g3_i7.path2	TRINITY_DN109604_c0_g1_i1.path1	Pepsico2_Contig13626.path1	TRINITY_DN12603_c0_g1_i2.path1
TRINITY_DN51934_c0_g1_i1.path1	Pepsico2_Contig10648.path1	novel.4836	novel.2234		TRINITY_DN78583_c0_g1_i1.path2	TRINITY_DN60733_c0_g1_i1.path1	Pepsico2_Contig14213.path1	Pepsico2_Contig5143.path1
novel.290	TRINITY_DN22425_c0_g1_i1.path1	TRINITY_DN11373_c1_g1_i12.path2	Pepsico2_Contig15498.path1		TRINITY_DN1827_c0_g2_i1.path1	TRINITY_DN26453_c0_g2_i5.path2	TRINITY_DN11760_c0_g1_i2.path1	Pepsico1_Contig6110.path1
novel.7729	Pepsico1_Contig37830.path1	novel.828	TRINITY_DN42793_c0_g2_i1.path1		TRINITY_DN11615_c0_g1_i1.path1	TRINITY_DN14321_c0_g1_i1.path1	TRINITY_DN87669_c0_g1_i1.path1	novel.6460
novel.263	Pepsico2_Contig4927.path2	TRINITY_DN32286_c0_g2_i1.path1	Pepsico2_Contig11065.path1		TRINITY_DN35651_c0_g1_i1.path1	novel.2683	TRINITY_DN14103_c0_g1_i5.path1	TRINITY_DN27388_c0_g3_i3.path1
TRINITY_DN4523_c1_g1_i1.path1	TRINITY_DN13270_c0_g1_i2.path1	TRINITY_DN13908_c0_g4_i1.path1	Pepsico1_Contig37083.path1		TRINITY_DN19031_c1_g1_i1.path1	Pepsico2_Contig7773.path1	TRINITY_DN10806_c1_g2_i8.path1	TRINITY_DN11017_c0_g2_i4.path3
TRINITY_DN95035_c0_g1_i1.path1	novel.5132	TRINITY_DN43919_c0_g1_i1.path1	TRINITY_DN4515_c0_g1_i17.path2		TRINITY_DN79961_c0_g1_i1.path1	Pepsico2_Contig2460.path1	TRINITY_DN5976_c0_g1_i12.path2	TRINITY_DN3106_c1_g1_i1.path1
novel.51	TRINITY_DN63191_c0_g1_i1.path1	novel.2067	Pepsico2_Contig11254.path1		novel.8257	TRINITY_DN7412_c0_g1_i1.path1	Pepsico2_Contig11300.path1	Pepsico2_Contig7604.path1
novel.2582	TRINITY_DN25384_c0_g1_i1.path1	Pepsico2_Contig4152.path1	TRINITY_DN19468_c0_g2_i2.path1		TRINITY_DN11147_c0_g1_i1.path2	TRINITY_DN79263_c0_g1_i1.path1	novel.2119	novel.2116
TRINITY_DN11150_c1_g2_i1.path1	novel.9736	TRINITY_DN6633_c0_g1_i5.path2	Pepsico1_Contig1873.path2		Pepsico2_Contig4539.path1	novel.4164	Pepsico2_Contig10148.path1	Pepsico2_Contig19467.path1
TRINITY_DN37508_c0_g2_i1.path1	novel.5207	TRINITY_DN52537_c0_g1_i1.path1	TRINITY_DN20691_c0_g2_i1.path2		Pepsico2_Contig15460.path1	Pepsico2_Contig20023.path1	TRINITY_DN97971_c0_g1_i1.path1	Pepsico2_Contig3799.path1
Pepsico2_Contig5879.path1	TRINITY_DN1040_c0_g1_i1.path1	TRINITY_DN11525_c0_g1_i21.path1	TRINITY_DN626_c0_g3_i1.path2		TRINITY_DN16257_c1_g1_i5.path1	TRINITY_DN23705_c0_g2_i2.path1	novel.1837	TRINITY_DN23948_c0_g2_i1.path1
novel.7029	novel.1857	TRINITY_DN106836_c0_g1_i1.path1	TRINITY_DN8304_c0_g1_i4.path1		TRINITY_DN22412_c0_g1_i1.path1	TRINITY_DN18135_c0_g1_i1.path1	novel.82	novel.10231
TRINITY_DN22012_c1_g1_i1.path1	TRINITY_DN4606_c0_g2_i1.path1	TRINITY_DN41957_c0_g1_i1.path1	TRINITY_DN12639_c0_g1_i6.path1		TRINITY_DN9886_c0_g1_i1.path1	TRINITY_DN11163_c1_g2_i1.path1	novel.5209	TRINITY_DN35718_c0_g2_i4.path1
TRINITY_DN12913_c0_g1_i2.path1	TRINITY_DN25100_c0_g2_i2.path1	TRINITY_DN90920_c0_g1_i1.path1	Pepsico2_Contig16082.path1		Pepsico2_Contig8789.path1	TRINITY_DN33707_c0_g1_i5.path1	TRINITY_DN23438_c0_g1_i5.path1	novel.9333
TRINITY_DN15559_c0_g2_i2.path2	TRINITY_DN5401_c0_g1_i7.path1	Pepsico1_Contig7763.path1	TRINITY_DN37359_c0_g1_i1.path3		TRINITY_DN253_c0_g2_i12.path1	TRINITY_DN11005_c1_g1_i2.path1	TRINITY_DN14241_c0_g1_i1.path1	Pepsico2_Contig7773.path1
TRINITY_DN3664_c0_g3_i1.path2	TRINITY_DN7630_c0_g1_i1.path3	Pepsico2_Contig21049.path1	TRINITY_DN582_c2_g1_i6.path3		Pepsico1_Contig1620.path2	novel.3240	TRINITY_DN3106_c0_g2_i1.path1	TRINITY_DN7216_c1_g2_i1.path1
Pepsico2_Contig17149.path2	novel.7286	novel.5137	Pepsico2_Contig17795.path1		TRINITY_DN35651_c0_g2_i2.path1	TRINITY_DN2414_c1_g1_i3.path1	Pepsico2_Contig2406.path1	Pepsico2_Contig13626.path1
TRINITY_DN10097_c0_g1_i2.path1	TRINITY_DN6189_c0_g2_i2.path1	novel.8470	TRINITY_DN78422_c0_g1_i2.path1		TRINITY_DN10620_c0_g1_i4.path1	novel.1785	TRINITY_DN15092_c0_g1_i1.path1	TRINITY_DN320_c0_g1_i1.path1
TRINITY_DN32553_c0_g1_i1.path1	novel.5643	novel.6580	Pepsico2_Contig10148.path1		novel.7636	Pepsico2_Contig7517.path2	Pepsico2_Contig2029.path1	TRINITY_DN16045_c1_g1_i4.path1
TRINITY_DN33361_c0_g1_i5.path2	TRINITY_DN5355_c1_g1_i3.path1	TRINITY_DN11017_c0_g2_i4.path3	novel.9681		TRINITY_DN8096_c0_g1_i4.path1	TRINITY_DN51761_c3_g2_i3.path1	TRINITY_DN52025_c0_g2_i1.path1	TRINITY_DN1459_c0_g2_i3.path1
TRINITY_DN23493_c0_g1_i1.path1	novel.1513	novel.9333	TRINITY_DN25055_c0_g2_i1.path1		TRINITY_DN46281_c0_g1_i1.path3	Pepsico2_Contig4918.path1	novel.9345	novel.5145
TRINITY_DN1139_c0_g1_i1.path1	TRINITY_DN3394_c1_g1_i3.path1	novel.5132	novel.2067		novel.3674	TRINITY_DN17710_c0_g2_i2.path1	novel.9761	novel.7991
TRINITY_DN33617_c0_g1_i1.path1	TRINITY_DN25012_c0_g2_i2.path1	Pepsico2_Contig10148.path1	TRINITY_DN32288_c0_g3_i1.path1		TRINITY_DN549_c0_g1_i4.path1	TRINITY_DN16114_c0_g1_i3.path1	TRINITY_DN12913_c0_g1_i2.path2	TRINITY_DN6454_c0_g2_i1.path1
Pepsico2_Contig15617.path1	Pepsico2_Contig14530.path1	novel.6846	TRINITY_DN8089_c0_g1_i3.path1		TRINITY_DN4207_c0_g1_i1.path1	novel.2466	Pepsico2_Contig3799.path1	novel.1377
Pepsico2_Contig17640.path1	novel.3716	TRINITY_DN11593_c1_g1_i7.path2	TRINITY_DN36978_c0_g1_i1.path1		novel.4050	TRINITY_DN35910_c0_g1_i1.path1	novel.3129	novel.1229
Pepsico2_Contig6897.path1	TRINITY_DN45971_c0_g1_i3.path1	TRINITY_DN13270_c0_g1_i2.path1	Pepsico2_Contig15246.path1		TRINITY_DN11005_c1_g1_i2.path1	Pepsico2_Contig18269.path1	Pepsico1_Contig7579.path1	Pepsico2_Contig4732.path1
Pepsico2_Contig9370.path1	Pepsico1_Contig2899.path1	TRINITY_DN2098_c1_g1_i5.path1	TRINITY_DN26530_c1_g1_i1.path2		TRINITY_DN35060_c1_g1_i1.path1	novel.2510	novel.5640	TRINITY_DN24212_c0_g1_i1.path1
novel.3473	Pepsico1_Contig3350.path2	TRINITY_DN9120_c1_g1_i2.path1	Pepsico2_Contig1180.path1		TRINITY_DN15406_c0_g1_i1.path1	TRINITY_DN49172_c0_g1_i1.path1	TRINITY_DN10782_c0_g1_i1.path1	Pepsico2_Contig17958.path1
Pepsico2_Contig1038.path1	TRINITY_DN7127_c0_g2_i6.path1	TRINITY_DN4027_c0_g5_i1.path1	novel.3399		TRINITY_DN16411_c0_g1_i5.path1	Pepsico2_Contig11248.path1	Pepsico2_Contig17958.path1	TRINITY_DN16767_c0_g1_i2.path1
TRINITY_DN37359_c0_g1_i1.path3	TRINITY_DN3163_c0_g1_i6.path1	TRINITY_DN22584_c0_g3_i1.path1	novel.8351		TRINITY_DN3062_c2_g1_i2.path1	TRINITY_DN35580_c0_g1_i6.path1	novel.10221	TRINITY_DN23468_c0_g1_i2.path2
TRINITY_DN1569_c2_g2_i1.path1	novel.6992	novel.8916	TRINITY_DN21860_c0_g3_i2.path1		TRINITY_DN45877_c0_g1_i1.path1	Pepsico2_Contig3520.path1	Pepsico2_Contig6611.path2	novel.8191
TRINITY_DN25572_c0_g1_i1.path1	TRINITY_DN79513_c0_g1_i1.path1	TRINITY_DN1040_c0_g1_i1.path1	Pepsico1_Contig916.path1		TRINITY_DN95125_c0_g1_i1.path1	TRINITY_DN14129_c0_g1_i5.path2	TRINITY_DN15198_c0_g3_i1.path1	TRINITY_DN249_c1_g1_i1.path1
Pepsico2_Contig11667.path1	TRINITY_DN16825_c0_g1_i7.path1	novel.1318	Pepsico2_Contig20286.path2		novel.3240	novel.4101	Pepsico2_Contig3722.path1	novel.1155
TRINITY_DN109491_c0_g1_i1.path1	TRINITY_DN19392_c0_g2_i1.path1	TRINITY_DN16767_c0_g1_i2.path1	TRINITY_DN19031_c0_g2_i1.path1		Pepsico2_Contig12716.path1	novel.7423	TRINITY_DN78750_c0_g1_i1.path1	TRINITY_DN10242_c0_g1_i5.path2
TRINITY_DN18723_c0_g3_i9.path1	TRINITY_DN9612_c0_g1_i1.path2	TRINITY_DN8089_c0_g1_i3.path1	TRINITY_DN5904_c0_g1_i3.path1		TRINITY_DN91140_c0_g1_i1.path2	TRINITY_DN36053_c0_g1_i1.path1	TRINITY_DN16585_c0_g1_i1.path1	TRINITY_DN12381_c0_g1_i1.path1
TRINITY_DN3394_c1_g1_i3.path1	Pepsico2_Contig1104.path1	TRINITY_DN14314_c1_g1_i2.path1	TRINITY_DN99485_c0_g1_i1.path1		TRINITY_DN8756_c9_g1_i1.path3	TRINITY_DN6909_c0_g1_i6.path1	TRINITY_DN12548_c0_g1_i3.path1	TRINITY_DN35046_c0_g2_i1.path1
Pepsico2_Contig4851.path1	novel.4266	TRINITY_DN4484_c1_g1_i2.path1	TRINITY_DN25461_c0_g1_i1.path1		TRINITY_DN99572_c0_g1_i1.path1	novel.10240	TRINITY_DN6421_c0_g1_i4.path1	TRINITY_DN89105_c0_g1_i1.path1
TRINITY_DN1580_c0_g1_i4.path2	TRINITY_DN101432_c0_g1_i1.path1	Pepsico1_Contig1433.path1	novel.42		novel.8630	TRINITY_DN46578_c0_g1_i1.path1	Pepsico1_Contig5974.path1	TRINITY_DN38217_c0_g1_i1.path1
TRINITY_DN30113_c1_g1_i1.path1	TRINITY_DN11593_c1_g2_i1.path1	TRINITY_DN37834_c0_g4_i1.path1	TRINITY_DN37508_c0_g1_i2.path1		TRINITY_DN8137_c0_g1_i1.path1	TRINITY_DN10620_c0_g1_i4.path1	Pepsico2_Contig7794.path1	TRINITY_DN38179_c0_g1_i1.path1
TRINITY_DN29865_c0_g1_i1.path2	Pepsico1_Contig28290.path1	novel.8601	TRINITY_DN582_c2_g1_i6.path2		TRINITY_DN88673_c0_g1_i1.path1	novel.1489	novel.10140	TRINITY_DN10738_c0_g2_i1.path2
TRINITY_DN15878_c0_g2_i1.path1	Pepsico2_Contig6624.path1	Pepsico2_Contig17842.path1	TRINITY_DN61085_c0_g1_i1.path1		TRINITY_DN4885_c0_g4_i1.path1	TRINITY_DN53024_c0_g1_i1.path1	Pepsico2_Contig20182.path1	novel.2226
TRINITY_DN60733_c0_g1_i1.path2	Pepsico2_Contig17718.path1	novel.8711	TRINITY_DN36478_c0_g1_i3.path1		Pepsico2_Contig4950.path1	Pepsico2_Contig19129.path1	novel.8383	TRINITY_DN34195_c0_g1_i2.path1
TRINITY_DN28234_c0_g2_i1.path2	Pepsico1_Contig15322.path1	Pepsico2_Contig17404.path1	TRINITY_DN6538_c0_g1_i1.path1		TRINITY_DN18326_c0_g1_i2.path1	novel.2332	novel.4381	novel.7357
Pepsico1_Contig421.path1	TRINITY_DN14383_c0_g2_i2.path1	TRINITY_DN431_c0_g1_i7.path2	TRINITY_DN50781_c0_g1_i1.path1		TRINITY_DN6293_c0_g1_i1.path1	TRINITY_DN57668_c0_g1_i1.path1	Pepsico2_Contig18542.path1	Pepsico2_Contig17023.path1
TRINITY_DN8929_c0_g1_i2.path1	Pepsico2_Contig21198.path1	TRINITY_DN27247_c0_g1_i1.path1	Pepsico2_Contig16776.path1		Pepsico1_Contig7006.path1	Pepsico1_Contig1860.path1	TRINITY_DN25384_c0_g2_i1.path3	novel.5132
TRINITY_DN14191_c0_g1_i1.path2	TRINITY_DN95487_c0_g1_i1.path1	novel.8182	TRINITY_DN41957_c0_g1_i1.path1		Pepsico2_Contig2618.path1	TRINITY_DN95125_c0_g1_i1.path1	novel.5700	novel.4929
Pepsico2_Contig748.path1	TRINITY_DN17793_c0_g3_i2.path1	TRINITY_DN12207_c0_g1_i1.path1	novel.2		TRINITY_DN55504_c0_g1_i1.path1	novel.10120	Pepsico2_Contig19604.path1	Pepsico2_Contig15617.path1
novel.2953	TRINITY_DN4132_c1_g1_i1.path1	TRINITY_DN648_c1_g1_i8.path2	TRINITY_DN9154_c0_g2_i1.path1		TRINITY_DN66377_c0_g1_i1.path1	TRINITY_DN24409_c0_g1_i2.path1	Pepsico2_Contig6161.path1	Pepsico2_Contig13651.path1
Pepsico2_Contig13121.path1	TRINITY_DN35164_c0_g1_i1.path1	novel.7183	TRINITY_DN5602_c0_g1_i1.path1		TRINITY_DN12045_c0_g1_i2.path1	TRINITY_DN87669_c0_g1_i1.path1	TRINITY_DN30653_c0_g1_i1.path1	TRINITY_DN3070_c1_g1_i2.path1
Pepsico1_Contig814.path2	novel.280	novel.6930	TRINITY_DN5931_c0_g1_i7.path1		novel.5625	Pepsico2_Contig7517.path1	Pepsico2_Contig2197.path2	TRINITY_DN15011_c0_g1_i1.path1
TRINITY_DN249_c0_g3_i1.path1	TRINITY_DN90920_c0_g1_i1.path1	novel.2116	TRINITY_DN91483_c0_g1_i1.path1		TRINITY_DN48930_c0_g1_i1.path1	Pepsico2_Contig7839.path2	TRINITY_DN40112_c0_g1_i1.path1	TRINITY_DN7412_c0_g1_i1.path1
TRINITY_DN68113_c0_g1_i1.path1	TRINITY_DN771_c0_g1_i2.path1	novel.6977	novel.742		TRINITY_DN27817_c0_g1_i1.path1	TRINITY_DN976_c0_g1_i2.path2	TRINITY_DN6846_c1_g1_i1.path1	Pepsico2_Contig11667.path1
Pepsico2_Contig16082.path1	Pepsico2_Contig18206.path2	Pepsico2_Contig6611.path2	TRINITY_DN11513_c0_g1_i3.path1		Pepsico2_Contig13099.path1	novel.4643	TRINITY_DN1454_c0_g1_i1.path1	TRINITY_DN43808_c0_g4_i1.path1
TRINITY_DN245_c0_g2_i1.path1	TRINITY_DN26976_c0_g1_i3.path1	novel.5258	TRINITY_DN555_c0_g1_i2.path1		novel.2683	Pepsico2_Contig11033.path1	Pepsico1_Contig1511.path1	Pepsico1_Contig1433.path1
Pepsico2_Contig6378.path1	novel.2516	novel.6264	TRINITY_DN25287_c0_g2_i1.path1		Pepsico2_Contig3537.path2	TRINITY_DN108824_c0_g1_i1.path1	Pepsico2_Contig7773.path1	Pepsico2_Contig3476.path1
Pepsico2_Contig752.path1	TRINITY_DN11586_c0_g2_i3.path1	novel.9609	TRINITY_DN11076_c0_g1_i1.path2		TRINITY_DN23428_c0_g1_i1.path1	Pepsico2_Contig14991.path2	novel.5385	novel.4924
TRINITY_DN80128_c0_g1_i1.path1	Pepsico2_Contig10148.path1	TRINITY_DN7915_c0_g2_i2.path1	TRINITY_DN96580_c0_g1_i1.path1		Pepsico2_Contig19497.path1	novel.1997	novel.6272	TRINITY_DN6538_c0_g1_i1.path1
novel.2937	Pepsico2_Contig2004.path2	TRINITY_DN8237_c0_g1_i1.path1	novel.7518		Pepsico2_Contig10308.path1	Pepsico2_Contig20608.path1	Pepsico2_Contig6237.path1	Pepsico2_Contig19649.path2
TRINITY_DN3567_c0_g2_i2.path1	TRINITY_DN91196_c0_g1_i1.path1	Pepsico2_Contig7195.path2	novel.8881		novel.7137	TRINITY_DN3986_c0_g1_i1.path1	Pepsico2_Contig19708.path1	TRINITY_DN22584_c0_g2_i1.path1
TRINITY_DN5174_c1_g1_i2.path1	Pepsico2_Contig7175.path1	novel.5740	Pepsico2_Contig19649.path3		TRINITY_DN5144_c0_g1_i8.path2	novel.1849	TRINITY_DN33707_c0_g1_i5.path1	Pepsico2_Contig6463.path1
Pepsico2_Contig8532.path1	TRINITY_DN2854_c0_g1_i1.path1	novel.9681	TRINITY_DN14533_c0_g1_i4.path2		TRINITY_DN2756_c0_g1_i2.path1	TRINITY_DN6421_c0_g1_i4.path1	novel.4164	novel.8801
Pepsico2_Contig7843.path1	TRINITY_DN29271_c0_g1_i2.path3	novel.826	novel.3805		TRINITY_DN22824_c0_g2_i1.path1	Pepsico2_Contig14826.path1	TRINITY_DN27339_c0_g1_i1.path1	TRINITY_DN50736_c0_g2_i1.path1
TRINITY_DN69448_c0_g1_i1.path1	Pepsico2_Contig14627.path1	Pepsico2_Contig1309.path1	TRINITY_DN29096_c0_g1_i9.path1		TRINITY_DN11593_c1_g1_i7.path2	Pepsico2_Contig6839.path1	TRINITY_DN5321_c0_g1_i10.path2	novel.9649
Pepsico2_Contig4586.path1	novel.9427	TRINITY_DN3664_c0_g3_i1.path2	Pepsico2_Contig15617.path1		Pepsico1_Contig3571.path1	TRINITY_DN43050_c0_g1_i1.path1	novel.4474	TRINITY_DN19092_c0_g2_i1.path1
novel.82	Pepsico2_Contig2406.path2	TRINITY_DN28145_c0_g3_i2.path1	TRINITY_DN7127_c0_g2_i6.path2		TRINITY_DN92130_c0_g1_i1.path1	Pepsico2_Contig2358.path1	TRINITY_DN16373_c0_g2_i1.path1	TRINITY_DN11181_c0_g1_i3.path1
TRINITY_DN24179_c1_g1_i1.path1	novel.2193	TRINITY_DN73578_c0_g1_i1.path1	TRINITY_DN9693_c0_g1_i7.path1		TRINITY_DN5857_c0_g1_i1.path1	TRINITY_DN5235_c0_g2_i1.path1	TRINITY_DN17397_c0_g1_i2.path1	TRINITY_DN22012_c1_g1_i1.path1
TRINITY_DN16818_c0_g3_i1.path1	Pepsico2_Contig19649.path3	novel.7569	TRINITY_DN13270_c0_g1_i2.path1		TRINITY_DN112617_c0_g1_i1.path1	novel.121	TRINITY_DN16373_c0_g1_i1.path1	TRINITY_DN15239_c0_g1_i10.path1
Pepsico1_Contig1934.path2	TRINITY_DN15272_c0_g3_i1.path1	novel.6941	Pepsico1_Contig892.path2		TRINITY_DN14265_c0_g1_i2.path1	novel.1098	TRINITY_DN29095_c0_g1_i2.path1	TRINITY_DN9890_c0_g1_i6.path2
TRINITY_DN33623_c0_g1_i3.path1	TRINITY_DN94912_c0_g1_i1.path1	Pepsico2_Contig19106.path1	Pepsico2_Contig17023.path1		TRINITY_DN39641_c0_g3_i1.path2	TRINITY_DN35789_c0_g1_i1.path2	novel.9333	Pepsico2_Contig20023.path1
TRINITY_DN22560_c0_g1_i4.path1	TRINITY_DN7127_c0_g2_i6.path2	Pepsico2_Contig20349.path1	Pepsico2_Contig3516.path1		novel.9063	TRINITY_DN2098_c1_g1_i5.path1	Pepsico2_Contig3011.path2	TRINITY_DN14904_c0_g1_i1.path1
TRINITY_DN6390_c0_g1_i3.path1	novel.2448	Pepsico2_Contig17803.path1	TRINITY_DN685_c1_g2_i1.path2		Pepsico1_Contig1307.path1	TRINITY_DN40344_c0_g1_i1.path1	TRINITY_DN24347_c0_g1_i2.path1	novel.3212
novel.6364	TRINITY_DN13323_c0_g2_i1.path1	novel.4694	novel.5635		Pepsico2_Contig15269.path1	Pepsico2_Contig11065.path1	Pepsico2_Contig17563.path2	TRINITY_DN10242_c0_g1_i5.path1
TRINITY_DN73289_c0_g1_i1.path1	Pepsico2_Contig6611.path4	TRINITY_DN5321_c0_g1_i10.path2	Pepsico2_Contig12802.path1		Pepsico2_Contig16301.path1	TRINITY_DN23121_c0_g2_i1.path2	TRINITY_DN38217_c0_g1_i1.path1	TRINITY_DN3634_c0_g1_i4.path1
TRINITY_DN25572_c0_g1_i1.path2	TRINITY_DN1459_c0_g2_i3.path1	TRINITY_DN10806_c1_g3_i2.path1	TRINITY_DN3677_c0_g1_i9.path1		Pepsico2_Contig14675.path1	TRINITY_DN4502_c0_g2_i1.path1	TRINITY_DN8969_c0_g1_i5.path2	novel.7441
TRINITY_DN13715_c0_g1_i1.path1	TRINITY_DN16614_c0_g2_i1.path1	TRINITY_DN11376_c0_g1_i5.path1	TRINITY_DN7795_c0_g1_i6.path1		novel.2550	Pepsico2_Contig8195.path1	TRINITY_DN12603_c0_g1_i2.path1	TRINITY_DN28511_c0_g1_i5.path1
TRINITY_DN96580_c0_g1_i1.path1	Pepsico2_Contig4262.path1	novel.2760	TRINITY_DN9845_c0_g1_i2.path1		TRINITY_DN47229_c0_g1_i1.path1	novel.1481	TRINITY_DN28026_c0_g1_i1.path1	Pepsico2_Contig4539.path1
Pepsico1_Contig38218.path1	TRINITY_DN26045_c0_g1_i4.path1	TRINITY_DN12536_c0_g1_i4.path2	novel.9671		Pepsico1_Contig2161.path1	TRINITY_DN4132_c1_g1_i1.path1	novel.9972	TRINITY_DN10738_c0_g2_i1.path1
Pepsico2_Contig19818.path2	TRINITY_DN277_c2_g1_i1.path3	TRINITY_DN20769_c0_g1_i1.path2	TRINITY_DN17829_c0_g1_i1.path1		Pepsico2_Contig17000.path1	TRINITY_DN20775_c0_g1_i3.path2	Pepsico1_Contig47.path1	Pepsico2_Contig1104.path1
novel.8808	TRINITY_DN94140_c0_g1_i1.path1	TRINITY_DN23496_c0_g1_i2.path2	novel.1625		novel.3787	TRINITY_DN17812_c0_g1_i4.path2	TRINITY_DN16572_c0_g1_i1.path1	novel.1031
TRINITY_DN7311_c0_g1_i1.path1	novel.9213	TRINITY_DN79513_c0_g1_i1.path1	TRINITY_DN25120_c0_g1_i1.path1		TRINITY_DN97146_c0_g1_i1.path1	Pepsico1_Contig1896.path1	novel.6711	Pepsico1_Contig1896.path1
Pepsico2_Contig2004.path2	Pepsico2_Contig4539.path1	TRINITY_DN23468_c0_g1_i2.path2	TRINITY_DN9196_c0_g1_i2.path1		TRINITY_DN36164_c0_g1_i1.path1	TRINITY_DN1201_c2_g1_i2.path1	TRINITY_DN11150_c1_g2_i1.path1	TRINITY_DN4812_c0_g1_i1.path1
TRINITY_DN50089_c0_g1_i4.path1	TRINITY_DN53169_c0_g1_i1.path1	TRINITY_DN15272_c0_g2_i1.path1	TRINITY_DN23713_c0_g1_i1.path1		TRINITY_DN10826_c0_g1_i2.path1	TRINITY_DN20414_c0_g2_i1.path1	TRINITY_DN30789_c0_g2_i1.path2	TRINITY_DN40344_c0_g1_i1.path1
TRINITY_DN59616_c0_g1_i1.path1	TRINITY_DN4504_c1_g1_i2.path2	Pepsico1_Contig29103.path2	Pepsico2_Contig2406.path2		Pepsico2_Contig2460.path1	novel.4572	TRINITY_DN34195_c0_g1_i2.path2	TRINITY_DN8969_c0_g1_i5.path2
TRINITY_DN100308_c0_g1_i1.path1	novel.5640	novel.6126	TRINITY_DN9568_c0_g1_i5.path1		TRINITY_DN9701_c0_g1_i1.path1	TRINITY_DN648_c1_g1_i8.path1	TRINITY_DN5536_c1_g1_i4.path2	Pepsico2_Contig13147.path1
TRINITY_DN43677_c0_g2_i2.path1	novel.6995	novel.9764	TRINITY_DN6551_c0_g4_i2.path1		novel.678	TRINITY_DN13254_c1_g1_i1.path1	TRINITY_DN52891_c0_g1_i1.path1	TRINITY_DN14061_c0_g2_i1.path2
TRINITY_DN35511_c0_g2_i1.path1	novel.2116	TRINITY_DN4225_c0_g1_i11.path1	TRINITY_DN11606_c0_g1_i4.path1		TRINITY_DN17502_c0_g1_i2.path1	Pepsico2_Contig17145.path1	TRINITY_DN29271_c0_g1_i2.path3	Pepsico2_Contig4423.path1
novel.3547	novel.6131	novel.5145	Pepsico1_Contig3082.path1		novel.656	novel.5900	Pepsico1_Contig1649.path1	TRINITY_DN32968_c0_g1_i1.path1
TRINITY_DN10806_c1_g2_i8.path1	novel.7636	novel.8235	Pepsico2_Contig2406.path1		TRINITY_DN102546_c0_g1_i1.path1	Pepsico1_Contig2674.path1	TRINITY_DN13294_c1_g1_i1.path1	novel.2183
TRINITY_DN16373_c0_g1_i1.path1	TRINITY_DN10794_c1_g1_i3.path1	TRINITY_DN582_c2_g1_i6.path1	TRINITY_DN15475_c0_g1_i1.path1		novel.3468	TRINITY_DN1201_c0_g1_i3.path1	TRINITY_DN1019_c0_g2_i1.path1	TRINITY_DN6989_c0_g1_i1.path1
TRINITY_DN44510_c0_g1_i1.path1	novel.2291	Pepsico1_Contig4345.path1	TRINITY_DN1019_c0_g2_i1.path1		TRINITY_DN10656_c0_g3_i1.path3	novel.9659	novel.9838	TRINITY_DN38078_c0_g1_i1.path1
TRINITY_DN12548_c0_g1_i3.path1	TRINITY_DN58751_c0_g1_i1.path1	TRINITY_DN7125_c0_g1_i8.path1	Pepsico1_Contig5126.path1		TRINITY_DN57296_c0_g1_i1.path1	TRINITY_DN10873_c0_g2_i1.path1	Pepsico2_Contig7604.path1	Pepsico1_Contig47.path1
Pepsico2_Contig7109.path1	TRINITY_DN39335_c0_g1_i1.path2	novel.1308	TRINITY_DN35543_c0_g1_i4.path1		TRINITY_DN35966_c0_g2_i1.path1	Pepsico2_Contig3750.path2	TRINITY_DN7178_c0_g2_i1.path1	TRINITY_DN18179_c0_g2_i1.path2
novel.4266	novel.2119	TRINITY_DN23152_c0_g1_i1.path1	novel.9333		novel.7818	Pepsico1_Contig14950.path1	Pepsico1_Contig1479.path1	TRINITY_DN8233_c0_g3_i1.path1
TRINITY_DN34205_c0_g1_i1.path3	TRINITY_DN25287_c0_g3_i1.path1	Pepsico2_Contig4425.path1	TRINITY_DN65056_c0_g1_i1.path1		TRINITY_DN44585_c0_g1_i1.path1	Pepsico2_Contig2300.path1	novel.9764	TRINITY_DN27955_c0_g1_i1.path1
Pepsico2_Contig21049.path1	TRINITY_DN14410_c0_g1_i1.path1	Pepsico1_Contig1029.path1	novel.8580		TRINITY_DN31463_c0_g1_i1.path1	Pepsico2_Contig2492.path1	TRINITY_DN27388_c0_g3_i3.path1	TRINITY_DN2053_c0_g1_i15.path1
TRINITY_DN68974_c0_g1_i1.path1	TRINITY_DN36995_c0_g2_i1.path1	TRINITY_DN25055_c0_g2_i1.path1	Pepsico2_Contig20779.path1		Pepsico2_Contig155.path1	TRINITY_DN29788_c0_g1_i1.path1	novel.4631	Pepsico2_Contig16982.path2
Pepsico2_Contig7511.path1	TRINITY_DN40354_c0_g1_i2.path1	novel.1005	TRINITY_DN200_c0_g1_i2.path1		TRINITY_DN21706_c0_g1_i3.path1	Pepsico2_Contig6456.path1	Pepsico2_Contig19649.path2	TRINITY_DN4484_c1_g1_i2.path1
TRINITY_DN21572_c0_g1_i1.path1	novel.3129	TRINITY_DN32603_c0_g1_i1.path1	TRINITY_DN10738_c0_g2_i1.path1		novel.611	TRINITY_DN108772_c0_g1_i1.path1	TRINITY_DN23428_c0_g1_i1.path1	TRINITY_DN24347_c0_g1_i2.path1
novel.8487	TRINITY_DN23438_c0_g1_i5.path1	novel.1942	TRINITY_DN4532_c0_g1_i4.path2		Pepsico2_Contig8600.path1	TRINITY_DN13270_c0_g1_i2.path1	Pepsico2_Contig17803.path1	TRINITY_DN5135_c0_g1_i1.path1
TRINITY_DN5232_c0_g1_i7.path1	Pepsico2_Contig17842.path1	novel.1820	TRINITY_DN17959_c1_g1_i1.path1		novel.9492	novel.6126	TRINITY_DN22012_c1_g1_i1.path1	novel.7472
TRINITY_DN23468_c0_g1_i2.path2	Pepsico1_Contig4345.path1	novel.7286	TRINITY_DN4027_c0_g5_i1.path2		TRINITY_DN58518_c0_g2_i1.path1	novel.8037	TRINITY_DN59891_c1_g1_i2.path1	Pepsico1_Contig5974.path1
TRINITY_DN32319_c0_g1_i1.path1	TRINITY_DN28038_c0_g1_i1.path1	TRINITY_DN38451_c0_g1_i8.path1	Pepsico2_Contig367.path1		novel.8116	novel.9397	TRINITY_DN19092_c0_g1_i1.path1	TRINITY_DN32487_c0_g1_i2.path1
Pepsico2_Contig20651.path2	TRINITY_DN4812_c0_g1_i1.path1	TRINITY_DN1928_c0_g1_i7.path1	Pepsico2_Contig4961.path1		TRINITY_DN7472_c0_g3_i1.path1	TRINITY_DN18264_c0_g1_i3.path1	TRINITY_DN109604_c0_g1_i1.path1	novel.7184
Pepsico2_Contig12412.path1	novel.2121	Pepsico2_Contig16657.path3	novel.3116		TRINITY_DN57799_c0_g1_i1.path1	TRINITY_DN1945_c0_g1_i3.path1	TRINITY_DN18259_c0_g1_i1.path1	Pepsico1_Contig886.path1
TRINITY_DN14443_c0_g2_i4.path1	TRINITY_DN90723_c0_g1_i1.path1	Pepsico2_Contig17023.path1	TRINITY_DN34417_c0_g2_i1.path1		TRINITY_DN18161_c0_g1_i10.path1	TRINITY_DN10806_c1_g2_i8.path2	TRINITY_DN27219_c0_g1_i7.path1	novel.9574
TRINITY_DN31212_c0_g2_i1.path1	Pepsico2_Contig7109.path1	Pepsico2_Contig18178.path1	TRINITY_DN4812_c0_g1_i1.path1		TRINITY_DN50833_c0_g1_i1.path1	TRINITY_DN5816_c1_g1_i1.path1	Pepsico2_Contig17052.path1	TRINITY_DN5602_c0_g1_i1.path1
TRINITY_DN19695_c0_g3_i1.path1	TRINITY_DN16507_c0_g1_i2.path1	TRINITY_DN25384_c0_g1_i1.path1	Pepsico1_Contig3661.path1		novel.10237	TRINITY_DN15959_c0_g1_i1.path1	TRINITY_DN606_c0_g1_i1.path1	Pepsico1_Contig1029.path2
TRINITY_DN13254_c1_g1_i1.path1	Pepsico2_Contig1309.path1	TRINITY_DN20944_c0_g1_i5.path1	TRINITY_DN11195_c1_g1_i1.path2		Pepsico2_Contig17412.path1	TRINITY_DN13022_c0_g1_i1.path1	Pepsico1_Contig1433.path1	Pepsico1_Contig1860.path1
Pepsico1_Contig601.path1	TRINITY_DN12548_c0_g1_i3.path1	novel.7701	Pepsico2_Contig17404.path1		TRINITY_DN87764_c0_g1_i1.path1	TRINITY_DN88045_c0_g1_i1.path1	Pepsico2_Contig21049.path1	novel.7086
Pepsico2_Contig4899.path1	TRINITY_DN26096_c0_g1_i4.path1	TRINITY_DN6454_c0_g2_i1.path1	TRINITY_DN397_c0_g2_i1.path1		TRINITY_DN1120_c0_g2_i4.path1	TRINITY_DN324_c0_g2_i1.path1	TRINITY_DN35046_c0_g2_i1.path1	TRINITY_DN277_c2_g1_i1.path3
novel.9213	TRINITY_DN29620_c0_g2_i1.path1	Pepsico1_Contig2398.path2	novel.5146		Pepsico2_Contig3621.path2	TRINITY_DN52841_c0_g1_i1.path1	TRINITY_DN52160_c0_g1_i1.path1	novel.8351
Pepsico1_Contig6915.path1	Pepsico2_Contig20569.path1	Pepsico2_Contig19649.path3	TRINITY_DN9701_c0_g1_i1.path1		novel.675	novel.7991	TRINITY_DN57668_c0_g1_i1.path1	TRINITY_DN9890_c0_g1_i6.path1
Pepsico2_Contig17383.path1	novel.6394	Pepsico2_Contig20286.path1	TRINITY_DN19578_c0_g2_i1.path1		TRINITY_DN36154_c1_g1_i1.path2	novel.329	TRINITY_DN26045_c0_g1_i4.path1	TRINITY_DN15198_c0_g1_i2.path2
TRINITY_DN2850_c0_g3_i1.path1	novel.2953	TRINITY_DN94140_c0_g1_i1.path1	novel.3717		TRINITY_DN47812_c0_g1_i2.path1	Pepsico2_Contig17883.path1	novel.2226	Pepsico2_Contig7984.path2
TRINITY_DN90811_c0_g1_i1.path1	novel.9492	Pepsico1_Contig1880.path1	TRINITY_DN494_c0_g1_i1.path1		novel.3742	novel.2151	TRINITY_DN80132_c0_g1_i1.path1	novel.2855
novel.4632	novel.7165	novel.8548	Pepsico2_Contig4818.path1		novel.4572	TRINITY_DN11198_c0_g1_i5.path1	TRINITY_DN249_c1_g1_i1.path1	TRINITY_DN29271_c0_g1_i2.path3
TRINITY_DN45866_c0_g1_i1.path1	Pepsico2_Contig21049.path1	Pepsico1_Contig1934.path2	TRINITY_DN40776_c0_g1_i1.path1		Pepsico2_Contig9615.path1	novel.51	TRINITY_DN16045_c1_g1_i4.path2	TRINITY_DN1201_c0_g1_i3.path1
Pepsico2_Contig17047.path1	TRINITY_DN48507_c0_g1_i1.path2	Pepsico1_Contig2462.path1	TRINITY_DN23043_c0_g1_i5.path1		TRINITY_DN89972_c0_g1_i1.path1	TRINITY_DN14238_c1_g1_i1.path1	TRINITY_DN60733_c0_g1_i1.path2	TRINITY_DN18161_c0_g1_i10.path1
Pepsico1_Contig1514.path1	Pepsico2_Contig6463.path1	novel.10016	TRINITY_DN9519_c0_g1_i4.path1		Pepsico2_Contig17370.path1	TRINITY_DN8832_c1_g1_i2.path1	novel.5395	Pepsico2_Contig18269.path1
Pepsico2_Contig6107.path1	novel.5258	Pepsico2_Contig14315.path1	novel.2141		TRINITY_DN7122_c0_g1_i3.path1	novel.4684	TRINITY_DN5199_c0_g2_i1.path1	Pepsico2_Contig3465.path1
TRINITY_DN61247_c0_g1_i1.path1	TRINITY_DN2377_c0_g1_i1.path1	novel.6006	Pepsico2_Contig9173.path1		TRINITY_DN838_c0_g1_i6.path1	novel.2005	TRINITY_DN21607_c0_g3_i3.path1	TRINITY_DN15210_c0_g1_i2.path1
TRINITY_DN11717_c0_g2_i2.path1	Pepsico2_Contig18089.path1	novel.7138	novel.4821		TRINITY_DN606_c0_g1_i1.path1	Pepsico2_Contig19669.path2	novel.1630	Pepsico2_Contig9084.path1
Pepsico2_Contig13077.path2	TRINITY_DN15272_c0_g2_i1.path1	TRINITY_DN18489_c1_g1_i1.path1	Pepsico1_Contig5048.path1		Pepsico2_Contig11033.path1	TRINITY_DN8392_c0_g1_i2.path1	TRINITY_DN96580_c0_g1_i1.path1	TRINITY_DN18264_c0_g1_i3.path1
novel.9809	Pepsico2_Contig13724.path1	Pepsico2_Contig6624.path1	TRINITY_DN18756_c0_g1_i1.path1		novel.9241	TRINITY_DN15092_c0_g1_i1.path1	Pepsico1_Contig473.path1	TRINITY_DN19900_c0_g2_i1.path1
novel.9685	Pepsico2_Contig17410.path1	TRINITY_DN9845_c0_g1_i2.path1	Pepsico2_Contig7869.path1		TRINITY_DN52688_c0_g1_i1.path1	TRINITY_DN4207_c0_g1_i1.path1	Pepsico1_Contig1860.path1	TRINITY_DN21860_c0_g3_i2.path3
Pepsico1_Contig6102.path1	novel.8916	novel.9457	novel.4114		TRINITY_DN58060_c0_g1_i1.path2	TRINITY_DN15952_c1_g1_i2.path2	TRINITY_DN8832_c1_g1_i2.path1	Pepsico2_Contig17052.path1
TRINITY_DN49612_c0_g1_i1.path1	TRINITY_DN8291_c1_g3_i8.path1	TRINITY_DN4515_c0_g1_i17.path3	TRINITY_DN29964_c0_g3_i1.path1		TRINITY_DN31076_c0_g1_i4.path1	Pepsico1_Contig6629.path1	TRINITY_DN11005_c1_g1_i2.path1	TRINITY_DN13000_c0_g2_i2.path1
TRINITY_DN32509_c0_g1_i2.path1	Pepsico2_Contig7843.path1	Pepsico2_Contig13724.path1	Pepsico2_Contig8062.path1		TRINITY_DN22425_c0_g1_i1.path3	TRINITY_DN65510_c0_g1_i1.path1	Pepsico2_Contig12692.path5	Pepsico2_Contig19649.path1
Pepsico2_Contig19157.path1	TRINITY_DN59680_c0_g1_i1.path1	TRINITY_DN15878_c0_g1_i6.path1	Pepsico1_Contig1029.path1		TRINITY_DN1968_c0_g1_i4.path1	TRINITY_DN64549_c0_g1_i1.path1	Pepsico2_Contig9464.path1	TRINITY_DN9201_c0_g1_i1.path1
Pepsico1_Contig916.path1	TRINITY_DN15239_c0_g1_i10.path1	Pepsico2_Contig9276.path1	Pepsico2_Contig11149.path1		Pepsico2_Contig9089.path1	TRINITY_DN6907_c0_g1_i2.path1	Pepsico2_Contig6486.path1	novel.1005
Pepsico2_Contig6148.path1	Pepsico1_Contig4877.path1	novel.7507	TRINITY_DN82762_c0_g1_i1.path1		novel.2053	TRINITY_DN38896_c0_g1_i1.path1	TRINITY_DN14061_c0_g2_i1.path2	Pepsico2_Contig14140.path1
novel.6995	TRINITY_DN32603_c0_g1_i1.path1	TRINITY_DN626_c0_g3_i1.path2	TRINITY_DN11282_c2_g1_i1.path1		TRINITY_DN8832_c1_g1_i2.path1	novel.6139	TRINITY_DN9393_c0_g1_i1.path1	novel.6691
novel.1565	TRINITY_DN9120_c1_g1_i2.path1	novel.7846	TRINITY_DN12676_c0_g1_i7.path1		novel.4317	novel.2822	TRINITY_DN10242_c0_g1_i5.path2	novel.8294
Pepsico2_Contig6539.path1	Pepsico2_Contig7732.path2	novel.3904	TRINITY_DN30113_c0_g1_i1.path1		TRINITY_DN2450_c1_g2_i1.path1	TRINITY_DN754_c0_g1_i2.path1	novel.4975	TRINITY_DN9377_c0_g1_i1.path1
novel.7636	TRINITY_DN43808_c0_g4_i1.path1	TRINITY_DN17775_c0_g2_i1.path1	TRINITY_DN9659_c0_g2_i1.path2		TRINITY_DN91921_c0_g1_i1.path1	Pepsico2_Contig20015.path1	TRINITY_DN11717_c0_g2_i2.path1	Pepsico2_Contig6486.path1
TRINITY_DN35164_c0_g1_i1.path1	TRINITY_DN49612_c0_g1_i1.path1	novel.2121	TRINITY_DN12129_c0_g1_i4.path2		Pepsico2_Contig8532.path2	TRINITY_DN26083_c0_g1_i3.path1	Pepsico2_Contig10893.path2	novel.6786
novel.9330	TRINITY_DN7068_c0_g1_i5.path1	Pepsico2_Contig15498.path1	novel.3557		TRINITY_DN21253_c0_g5_i1.path1	Pepsico1_Contig1433.path1	TRINITY_DN18168_c0_g1_i2.path1	TRINITY_DN4502_c0_g2_i1.path1
TRINITY_DN7193_c0_g1_i2.path1	novel.4929	novel.678	TRINITY_DN21996_c0_g1_i1.path1		TRINITY_DN4885_c0_g2_i1.path1	novel.9913	TRINITY_DN32487_c0_g1_i2.path1	TRINITY_DN62134_c5_g1_i1.path1
TRINITY_DN54476_c0_g1_i1.path1	Pepsico2_Contig19106.path1	TRINITY_DN42158_c0_g1_i1.path1	TRINITY_DN42158_c0_g1_i1.path1		TRINITY_DN31241_c0_g1_i1.path1	novel.9338	novel.6126	TRINITY_DN9154_c0_g2_i1.path1
TRINITY_DN16151_c0_g4_i1.path1	TRINITY_DN7178_c0_g2_i1.path1	TRINITY_DN1019_c0_g2_i1.path1	Pepsico2_Contig8092.path1		TRINITY_DN26545_c0_g1_i1.path2	TRINITY_DN34759_c0_g2_i1.path1	Pepsico1_Contig97.path1	TRINITY_DN39172_c0_g1_i4.path1
Pepsico2_Contig19670.path1	Pepsico2_Contig11122.path1	TRINITY_DN15884_c0_g2_i4.path2	Pepsico2_Contig8389.path2		TRINITY_DN50836_c1_g1_i1.path1	novel.4908	TRINITY_DN4885_c0_g3_i1.path1	TRINITY_DN16825_c0_g1_i7.path1
TRINITY_DN26281_c0_g2_i1.path1	TRINITY_DN18692_c2_g1_i1.path1	TRINITY_DN63191_c0_g1_i1.path1	TRINITY_DN16522_c0_g1_i3.path2		TRINITY_DN17710_c0_g1_i1.path1	novel.7010	TRINITY_DN32994_c0_g1_i1.path1	novel.3680
novel.1622	novel.6264	TRINITY_DN25287_c0_g2_i1.path1	TRINITY_DN42306_c0_g1_i3.path1		TRINITY_DN53881_c0_g1_i1.path1	Pepsico2_Contig13004.path1	novel.1781	TRINITY_DN5180_c0_g2_i3.path1
TRINITY_DN28048_c0_g1_i1.path2	Pepsico2_Contig12076.path1	novel.2969	novel.4694		TRINITY_DN4502_c0_g2_i1.path1	TRINITY_DN13350_c0_g1_i1.path1	Pepsico2_Contig5930.path2	TRINITY_DN14497_c0_g1_i2.path1
TRINITY_DN16114_c0_g1_i3.path1	Pepsico2_Contig19497.path1	novel.5499	TRINITY_DN9779_c1_g1_i1.path1		TRINITY_DN24519_c0_g1_i2.path1	Pepsico2_Contig3011.path2	Pepsico2_Contig7605.path1	TRINITY_DN8645_c0_g1_i16.path2
TRINITY_DN96412_c0_g1_i1.path1	Pepsico2_Contig16082.path1	novel.7626	TRINITY_DN102507_c0_g1_i1.path1		Pepsico1_Contig5244.path1	novel.7047	Pepsico2_Contig19818.path1	TRINITY_DN38626_c0_g3_i1.path1
Pepsico2_Contig12299.path2	TRINITY_DN106297_c0_g1_i1.path1	TRINITY_DN23438_c0_g1_i5.path1	TRINITY_DN79513_c0_g1_i1.path1		Pepsico1_Contig21216.path2	TRINITY_DN88261_c0_g1_i1.path1	TRINITY_DN78849_c0_g1_i1.path1	Pepsico1_Contig2049.path1
Pepsico2_Contig12823.path2	TRINITY_DN71191_c0_g1_i1.path1	TRINITY_DN37508_c0_g1_i2.path1	novel.1942		Pepsico2_Contig17058.path1	TRINITY_DN9377_c0_g1_i1.path1	novel.1229	novel.7604
novel.1	TRINITY_DN15885_c0_g1_i1.path2	TRINITY_DN11128_c0_g1_i8.path1	novel.8294		TRINITY_DN13217_c1_g1_i1.path1	TRINITY_DN59891_c1_g1_i2.path1	novel.8779	TRINITY_DN26045_c0_g1_i4.path1
TRINITY_DN18489_c1_g1_i1.path1	novel.8944	TRINITY_DN4595_c0_g3_i1.path2	TRINITY_DN13963_c0_g1_i1.path1		TRINITY_DN56086_c0_g2_i1.path1	TRINITY_DN6909_c0_g1_i6.path2	TRINITY_DN40354_c0_g1_i2.path1	novel.2707
TRINITY_DN2385_c0_g1_i1.path2	TRINITY_DN648_c1_g1_i8.path1	TRINITY_DN9196_c0_g1_i2.path1	Pepsico2_Contig18183.path1		TRINITY_DN14241_c0_g1_i1.path1	TRINITY_DN69825_c0_g1_i1.path1	TRINITY_DN10561_c0_g1_i1.path1	TRINITY_DN14827_c0_g1_i1.path1
TRINITY_DN28755_c0_g1_i1.path1	Pepsico2_Contig1861.path1	novel.2457	novel.4836		TRINITY_DN356_c0_g1_i3.path1	Pepsico2_Contig3750.path1	novel.4050	TRINITY_DN16614_c0_g2_i1.path1
novel.2030	Pepsico2_Contig15323.path1	TRINITY_DN23948_c0_g2_i1.path1	TRINITY_DN2354_c0_g1_i4.path2		novel.1393	TRINITY_DN1917_c0_g1_i1.path1	TRINITY_DN6025_c0_g1_i12.path1	novel.4360
TRINITY_DN2852_c0_g1_i3.path2	novel.5700	TRINITY_DN15878_c0_g1_i6.path2	TRINITY_DN12536_c0_g1_i4.path2		Pepsico2_Contig17883.path1	TRINITY_DN9230_c0_g1_i2.path2	novel.9736	novel.73
Pepsico2_Contig15323.path1	TRINITY_DN47812_c0_g1_i2.path1	Pepsico2_Contig1759.path1	TRINITY_DN19732_c1_g1_i2.path2		TRINITY_DN37924_c0_g3_i1.path1	TRINITY_DN33151_c0_g1_i1.path1	TRINITY_DN6065_c0_g1_i2.path1	TRINITY_DN27095_c0_g1_i1.path1
TRINITY_DN11593_c1_g1_i7.path2	Pepsico1_Contig2378.path1	Pepsico1_Contig6100.path1	TRINITY_DN29565_c0_g1_i3.path3		Pepsico2_Contig3085.path1	TRINITY_DN6999_c0_g2_i1.path1	TRINITY_DN10242_c0_g1_i5.path1	Pepsico2_Contig1163.path1
TRINITY_DN2455_c1_g1_i5.path1	TRINITY_DN19898_c0_g5_i2.path1	TRINITY_DN36978_c0_g1_i1.path1	Pepsico1_Contig1783.path1		TRINITY_DN56086_c0_g1_i1.path1	Pepsico2_Contig17149.path1	TRINITY_DN29620_c0_g2_i1.path1	Pepsico2_Contig200.path1
TRINITY_DN2173_c0_g1_i1.path1	novel.8601	Pepsico2_Contig8092.path1	TRINITY_DN21918_c0_g1_i3.path1		TRINITY_DN79160_c0_g1_i1.path1	TRINITY_DN106711_c0_g1_i1.path1	Pepsico2_Contig21203.path1	TRINITY_DN108824_c0_g1_i1.path1
Pepsico2_Contig19393.path1	TRINITY_DN2850_c0_g3_i1.path1	TRINITY_DN2053_c0_g1_i15.path1	TRINITY_DN20518_c0_g1_i1.path2		novel.9967	TRINITY_DN107608_c0_g1_i1.path1	TRINITY_DN45570_c0_g1_i1.path1	novel.5189
novel.848	TRINITY_DN1968_c0_g1_i4.path2	TRINITY_DN89139_c0_g1_i1.path1	TRINITY_DN19203_c0_g1_i2.path1		novel.3013	Pepsico2_Contig8781.path1	TRINITY_DN56186_c0_g1_i1.path2	TRINITY_DN102479_c0_g1_i1.path1
TRINITY_DN49172_c0_g1_i1.path1	TRINITY_DN17959_c1_g1_i1.path1	Pepsico2_Contig9165.path2	Pepsico1_Contig10341.path1		Pepsico2_Contig16777.path1	TRINITY_DN30268_c0_g3_i2.path1	TRINITY_DN26200_c0_g1_i1.path1	Pepsico2_Contig10688.path1
Pepsico2_Contig9521.path1	Pepsico2_Contig17058.path1	TRINITY_DN99485_c0_g1_i1.path1	Pepsico2_Contig2980.path1		TRINITY_DN10802_c0_g1_i1.path2	novel.4115	novel.10172	novel.7309
novel.4758	TRINITY_DN1599_c1_g1_i3.path1	TRINITY_DN582_c2_g1_i6.path2	TRINITY_DN11181_c0_g1_i3.path1		TRINITY_DN50612_c0_g1_i1.path1	Pepsico2_Contig7604.path1	Pepsico2_Contig19393.path1	TRINITY_DN9230_c0_g1_i2.path2
novel.6171	TRINITY_DN19578_c0_g2_i1.path1	Pepsico2_Contig18624.path1	Pepsico1_Contig32727.path1		Pepsico2_Contig14438.path1	TRINITY_DN8756_c9_g1_i1.path3	Pepsico2_Contig18357.path1	Pepsico2_Contig20487.path1
TRINITY_DN90340_c0_g1_i1.path1	TRINITY_DN12536_c0_g1_i4.path2	TRINITY_DN49612_c0_g1_i1.path1	TRINITY_DN23468_c0_g1_i2.path2		TRINITY_DN14933_c0_g3_i1.path2	novel.10107	TRINITY_DN1917_c0_g1_i1.path1	TRINITY_DN27615_c0_g1_i1.path1
TRINITY_DN82356_c0_g1_i1.path1	novel.5863	Pepsico1_Contig10341.path1	Pepsico2_Contig9556.path1		TRINITY_DN13998_c0_g2_i1.path1	novel.9972	TRINITY_DN108824_c0_g1_i1.path1	novel.2457
TRINITY_DN100271_c0_g1_i1.path1	TRINITY_DN2450_c1_g2_i1.path1	novel.5207	TRINITY_DN1945_c0_g1_i3.path1		TRINITY_DN90053_c0_g1_i1.path1	TRINITY_DN38220_c0_g1_i2.path1	TRINITY_DN23943_c0_g5_i1.path1	novel.650
TRINITY_DN40344_c0_g1_i1.path1	novel.2798	TRINITY_DN245_c0_g2_i1.path1	TRINITY_DN13000_c0_g2_i2.path1		Pepsico2_Contig8201.path1	TRINITY_DN10437_c0_g1_i2.path1	Pepsico2_Contig7839.path2	TRINITY_DN8939_c0_g1_i1.path1
TRINITY_DN28511_c0_g1_i5.path1	Pepsico2_Contig20349.path1	TRINITY_DN43817_c0_g1_i1.path1	novel.1308		TRINITY_DN22318_c0_g2_i5.path1	TRINITY_DN58767_c0_g1_i1.path1	TRINITY_DN13830_c1_g1_i1.path1	TRINITY_DN27567_c0_g1_i1.path1
Pepsico1_Contig1896.path1	TRINITY_DN16114_c0_g1_i3.path1	novel.2117	TRINITY_DN71743_c0_g1_i1.path1		novel.9457	TRINITY_DN21547_c0_g2_i1.path2	TRINITY_DN16114_c0_g1_i3.path1	Pepsico2_Contig19106.path1
TRINITY_DN2450_c1_g2_i1.path1	TRINITY_DN2098_c1_g1_i5.path1	Pepsico2_Contig7511.path1	novel.8470		TRINITY_DN32274_c0_g3_i1.path1	TRINITY_DN10286_c0_g1_i2.path1	Pepsico2_Contig9173.path1	TRINITY_DN21918_c0_g1_i3.path1
Pepsico2_Contig6486.path1	novel.8131	TRINITY_DN22560_c0_g1_i4.path1	Pepsico2_Contig4402.path1		TRINITY_DN30789_c0_g2_i1.path2	Pepsico1_Contig35521.path2	TRINITY_DN13621_c0_g1_i1.path1	novel.8529
novel.3716	novel.3473	TRINITY_DN5602_c0_g1_i1.path1	TRINITY_DN5355_c1_g1_i3.path1		TRINITY_DN8174_c0_g1_i4.path1	TRINITY_DN99656_c0_g1_i1.path1	TRINITY_DN32968_c0_g1_i1.path1	TRINITY_DN17397_c0_g1_i2.path1
TRINITY_DN25492_c0_g1_i1.path1	Pepsico2_Contig638.path2	TRINITY_DN4812_c0_g1_i1.path1	novel.5192		TRINITY_DN91867_c0_g1_i1.path1	TRINITY_DN80397_c0_g1_i1.path1	TRINITY_DN10738_c0_g2_i1.path2	Pepsico2_Contig19690.path1
Pepsico2_Contig21198.path1	TRINITY_DN14775_c0_g1_i8.path1	TRINITY_DN39335_c0_g1_i1.path1	TRINITY_DN14904_c0_g1_i1.path2		novel.2798	TRINITY_DN22438_c0_g2_i1.path1	Pepsico1_Contig28824.path2	novel.7569
TRINITY_DN3623_c1_g2_i3.path1	Pepsico1_Contig2378.path2	TRINITY_DN55504_c0_g1_i1.path1	novel.9227		Pepsico2_Contig10869.path1	TRINITY_DN6929_c1_g1_i4.path1	Pepsico2_Contig20023.path1	TRINITY_DN2337_c0_g2_i1.path1
TRINITY_DN39236_c0_g1_i1.path1	TRINITY_DN6751_c0_g1_i5.path1	novel.6995	TRINITY_DN2864_c0_g1_i5.path1		TRINITY_DN91460_c0_g1_i1.path1	TRINITY_DN14103_c0_g1_i5.path1	TRINITY_DN32603_c0_g1_i1.path1	TRINITY_DN22425_c0_g1_i1.path1
novel.8801	TRINITY_DN9569_c0_g1_i3.path3	TRINITY_DN4523_c1_g1_i1.path1	Pepsico2_Contig3495.path1		TRINITY_DN8675_c0_g2_i1.path1	TRINITY_DN31278_c0_g1_i1.path1	Pepsico2_Contig13651.path1	TRINITY_DN24768_c0_g2_i1.path2
Pepsico2_Contig19554.path1	Pepsico1_Contig3100.path2	Pepsico2_Contig20393.path1	TRINITY_DN4576_c0_g1_i2.path1		novel.751	Pepsico1_Contig35521.path1	novel.2921	Pepsico2_Contig10893.path2
Pepsico2_Contig17537.path1	TRINITY_DN33800_c0_g1_i2.path2	TRINITY_DN102507_c0_g1_i1.path1	TRINITY_DN29271_c0_g1_i2.path3		Pepsico2_Contig7514.path1	Pepsico2_Contig14670.path1	TRINITY_DN11349_c0_g1_i2.path2	novel.4474
novel.9193	Pepsico2_Contig16672.path1	TRINITY_DN1928_c0_g1_i7.path2	TRINITY_DN6929_c1_g1_i4.path1		TRINITY_DN13954_c0_g1_i1.path1	TRINITY_DN5536_c1_g1_i4.path2	novel.4684	TRINITY_DN95125_c0_g1_i1.path1
TRINITY_DN21918_c0_g1_i3.path1	TRINITY_DN87669_c0_g1_i1.path1	Pepsico2_Contig18850.path1	Pepsico1_Contig171.path1		TRINITY_DN12254_c0_g1_i1.path1	TRINITY_DN58518_c0_g2_i1.path1	novel.6460	TRINITY_DN7209_c0_g1_i10.path1
novel.7396	TRINITY_DN16567_c0_g1_i1.path1	novel.7249	TRINITY_DN44353_c0_g1_i1.path1		Pepsico1_Contig35491.path1	novel.1288	TRINITY_DN80123_c0_g1_i1.path1	TRINITY_DN12381_c0_g2_i1.path1
Pepsico2_Contig6636.path1	Pepsico2_Contig19525.path2	novel.5932	novel.4904		TRINITY_DN65510_c0_g1_i1.path1	novel.4363	novel.6343	TRINITY_DN19392_c0_g2_i1.path1
TRINITY_DN8832_c1_g1_i2.path1	TRINITY_DN11167_c2_g1_i1.path1	novel.9156	TRINITY_DN6633_c0_g1_i5.path2		TRINITY_DN58174_c1_g1_i1.path1	Pepsico2_Contig19596.path1	TRINITY_DN38896_c0_g1_i1.path1	novel.4958
Pepsico2_Contig12329.path1	TRINITY_DN20290_c0_g1_i2.path1	TRINITY_DN25120_c0_g1_i1.path1	novel.6977		TRINITY_DN101134_c0_g1_i1.path1	TRINITY_DN5609_c0_g1_i1.path2	novel.10107	TRINITY_DN14014_c0_g3_i1.path1
Pepsico2_Contig13724.path1	TRINITY_DN26240_c0_g1_i1.path2	Pepsico1_Contig6934.path1	TRINITY_DN94140_c0_g1_i1.path1		TRINITY_DN19923_c0_g1_i3.path1	TRINITY_DN106906_c0_g1_i1.path1	TRINITY_DN49612_c0_g1_i1.path1	TRINITY_DN6102_c0_g1_i1.path1
Pepsico2_Contig7831.path1	TRINITY_DN34598_c0_g1_i2.path1	novel.2274	TRINITY_DN13323_c0_g2_i1.path1		TRINITY_DN3986_c0_g1_i1.path1	TRINITY_DN1827_c0_g2_i1.path1	novel.4924	novel.5310
TRINITY_DN26672_c1_g2_i2.path1	novel.9227	novel.9809	Pepsico2_Contig8879.path1		TRINITY_DN26083_c0_g1_i3.path1	TRINITY_DN31463_c0_g1_i1.path1	TRINITY_DN3394_c1_g1_i3.path1	TRINITY_DN685_c1_g2_i1.path2
TRINITY_DN16929_c1_g1_i4.path1	TRINITY_DN15762_c0_g2_i2.path1	TRINITY_DN19898_c0_g5_i2.path1	novel.3955		TRINITY_DN65392_c0_g1_i1.path1	TRINITY_DN7656_c0_g1_i1.path1	Pepsico2_Contig17718.path1	TRINITY_DN23705_c0_g2_i2.path2
TRINITY_DN35314_c0_g1_i3.path1	novel.1301	TRINITY_DN966_c0_g2_i3.path1	TRINITY_DN17775_c0_g2_i1.path1		Pepsico2_Contig6528.path1	TRINITY_DN5904_c0_g1_i3.path1	TRINITY_DN6139_c0_g2_i2.path1	TRINITY_DN10190_c0_g1_i5.path1
TRINITY_DN4812_c0_g1_i1.path1	novel.7557	TRINITY_DN18468_c0_g1_i6.path1	Pepsico2_Contig18850.path1		Pepsico2_Contig9966.path1	novel.9245	TRINITY_DN1928_c0_g1_i7.path1	TRINITY_DN2365_c0_g1_i15.path2
Pepsico2_Contig14707.path1	TRINITY_DN16298_c0_g2_i1.path1	Pepsico2_Contig17563.path2	TRINITY_DN34811_c1_g1_i1.path1		TRINITY_DN8622_c0_g3_i1.path1	TRINITY_DN4812_c0_g2_i2.path1	TRINITY_DN61085_c0_g1_i1.path1	TRINITY_DN13270_c0_g1_i2.path1
Pepsico2_Contig16657.path3	TRINITY_DN10806_c1_g3_i2.path1	TRINITY_DN4027_c0_g5_i1.path2	TRINITY_DN3419_c0_g1_i1.path1		TRINITY_DN21556_c0_g1_i1.path2	TRINITY_DN36731_c0_g1_i1.path2	TRINITY_DN48202_c0_g1_i2.path1	Pepsico2_Contig17803.path1
TRINITY_DN22959_c0_g1_i1.path2	Pepsico2_Contig12716.path1	novel.3259	novel.9373		Pepsico1_Contig855.path1	novel.9427	TRINITY_DN18723_c0_g1_i1.path2	novel.7029
novel.6126	TRINITY_DN35718_c0_g2_i4.path1	TRINITY_DN96580_c0_g1_i1.path1	Pepsico1_Contig3093.path2		novel.5230	TRINITY_DN29796_c0_g1_i1.path1	TRINITY_DN38179_c0_g1_i1.path1	novel.4904
Pepsico1_Contig771.path1	novel.2946	Pepsico2_Contig13209.path1	TRINITY_DN90490_c0_g1_i1.path1		TRINITY_DN14779_c0_g2_i1.path1	TRINITY_DN28452_c0_g1_i8.path1	Pepsico2_Contig6288.path1	novel.7228
TRINITY_DN27712_c0_g1_i1.path1	TRINITY_DN4532_c0_g1_i4.path2	TRINITY_DN12129_c0_g1_i4.path2	TRINITY_DN91049_c0_g1_i1.path2		TRINITY_DN24462_c0_g1_i1.path1	Pepsico2_Contig3845.path1	TRINITY_DN22741_c0_g2_i2.path1	TRINITY_DN59954_c0_g1_i3.path1
TRINITY_DN3731_c0_g2_i1.path1	TRINITY_DN10134_c0_g1_i1.path1	Pepsico2_Contig15246.path1	TRINITY_DN25384_c0_g1_i1.path1		novel.8024	TRINITY_DN40757_c0_g1_i2.path1	TRINITY_DN1928_c0_g1_i7.path2	TRINITY_DN78849_c0_g1_i1.path1
Pepsico2_Contig19525.path2	Pepsico2_Contig10852.path2	TRINITY_DN23713_c0_g1_i1.path1	TRINITY_DN276_c1_g1_i1.path1		Pepsico1_Contig886.path1	TRINITY_DN27295_c0_g1_i1.path1	Pepsico2_Contig1309.path1	TRINITY_DN43131_c0_g1_i2.path1
TRINITY_DN27247_c0_g1_i1.path1	TRINITY_DN15884_c0_g2_i4.path2	Pepsico1_Contig3661.path1	novel.2791		novel.5014	novel.2575	novel.7460	Pepsico2_Contig5650.path1
novel.7060	novel.7371	TRINITY_DN29865_c0_g1_i1.path2	TRINITY_DN10547_c0_g1_i17.path1		TRINITY_DN19760_c0_g1_i2.path1	TRINITY_DN26045_c0_g1_i4.path1	TRINITY_DN5721_c0_g1_i1.path1	TRINITY_DN8392_c0_g1_i2.path1
TRINITY_DN40297_c1_g1_i1.path1	TRINITY_DN36731_c0_g1_i1.path1	TRINITY_DN17397_c0_g1_i2.path1	TRINITY_DN24042_c0_g1_i2.path1		novel.3361	TRINITY_DN17801_c0_g1_i4.path1	Pepsico2_Contig12291.path1	Pepsico2_Contig15237.path1
TRINITY_DN15645_c1_g2_i1.path1	TRINITY_DN4604_c0_g2_i1.path1	TRINITY_DN112669_c0_g1_i1.path1	TRINITY_DN37834_c0_g4_i1.path1		novel.5614	Pepsico2_Contig4420.path1	TRINITY_DN9377_c0_g1_i1.path1	novel.2119
TRINITY_DN51163_c0_g1_i1.path1	TRINITY_DN27335_c0_g1_i1.path1	TRINITY_DN12676_c0_g1_i7.path1	TRINITY_DN4523_c1_g1_i1.path1		TRINITY_DN40344_c0_g1_i1.path1	TRINITY_DN18153_c0_g2_i1.path4	novel.1756	novel.2556
TRINITY_DN1634_c0_g1_i5.path1	TRINITY_DN10242_c0_g1_i5.path2	TRINITY_DN37282_c0_g1_i1.path2	TRINITY_DN106700_c0_g1_i1.path1		Pepsico2_Contig2989.path1	TRINITY_DN21752_c0_g1_i2.path2	TRINITY_DN13715_c0_g1_i1.path1	TRINITY_DN7127_c0_g2_i6.path2
TRINITY_DN10738_c0_g1_i1.path1	TRINITY_DN1019_c0_g2_i1.path2	TRINITY_DN12642_c0_g1_i9.path1	TRINITY_DN88632_c0_g1_i1.path1		TRINITY_DN27316_c0_g1_i2.path1	TRINITY_DN29095_c0_g1_i2.path1	Pepsico2_Contig17058.path1	TRINITY_DN12040_c0_g1_i15.path2
Pepsico1_Contig3210.path1	TRINITY_DN31787_c0_g1_i2.path1	TRINITY_DN16702_c0_g1_i1.path1	Pepsico2_Contig9040.path1		Pepsico1_Contig5108.path1	Pepsico2_Contig17137.path1	TRINITY_DN26545_c0_g1_i1.path1	Pepsico2_Contig3011.path2
Pepsico1_Contig6507.path1	TRINITY_DN9637_c0_g1_i4.path1	TRINITY_DN7122_c0_g1_i3.path1	TRINITY_DN6454_c0_g2_i1.path1		TRINITY_DN4_c0_g1_i6.path2	novel.9321	TRINITY_DN32288_c0_g3_i1.path1	Pepsico2_Contig21049.path1
Pepsico2_Contig5930.path1	TRINITY_DN25120_c0_g1_i1.path1	TRINITY_DN11406_c0_g1_i1.path1	novel.1758		Pepsico2_Contig2050.path1	TRINITY_DN27316_c0_g1_i2.path1	TRINITY_DN10738_c0_g2_i1.path1	novel.6785
Pepsico1_Contig16088.path2	TRINITY_DN29095_c0_g1_i2.path1	Pepsico2_Contig4402.path1	Pepsico2_Contig19393.path1		TRINITY_DN7915_c0_g2_i2.path1	Pepsico2_Contig19554.path1	TRINITY_DN16362_c0_g1_i1.path1	TRINITY_DN26408_c0_g1_i1.path1
Pepsico2_Contig14783.path1	Pepsico2_Contig8136.path1	novel.2791	Pepsico2_Contig16657.path3		Pepsico2_Contig1163.path1	TRINITY_DN56186_c0_g1_i1.path1	TRINITY_DN60733_c0_g1_i1.path1	Pepsico2_Contig12177.path1
novel.9156	Pepsico2_Contig4693.path1	TRINITY_DN14533_c0_g1_i4.path2	TRINITY_DN15884_c0_g2_i4.path2		novel.2367	TRINITY_DN253_c0_g2_i12.path1	Pepsico2_Contig6107.path1	novel.5694
TRINITY_DN8089_c0_g1_i3.path1	TRINITY_DN2337_c0_g1_i6.path1	TRINITY_DN16403_c0_g1_i3.path1	TRINITY_DN28511_c0_g1_i5.path1		TRINITY_DN24149_c0_g1_i1.path1	Pepsico2_Contig16939.path1	Pepsico2_Contig16982.path2	novel.10221
novel.5925	Pepsico2_Contig10852.path1	TRINITY_DN4502_c2_g1_i1.path1	TRINITY_DN52988_c0_g1_i1.path1		Pepsico2_Contig17225.path2	Pepsico2_Contig19779.path1	novel.5643	TRINITY_DN2210_c0_g2_i3.path1
TRINITY_DN19760_c0_g1_i2.path1	TRINITY_DN88385_c0_g1_i1.path1	TRINITY_DN10302_c0_g1_i5.path1	TRINITY_DN11593_c1_g2_i1.path1		TRINITY_DN112522_c0_g1_i1.path1	Pepsico1_Contig473.path1	TRINITY_DN17463_c0_g1_i3.path3	novel.10101
Pepsico2_Contig19818.path1	novel.2760	TRINITY_DN31623_c1_g1_i1.path1	novel.682		TRINITY_DN20395_c0_g1_i2.path1	novel.6730	Pepsico2_Contig2004.path2	TRINITY_DN18491_c0_g1_i3.path1
Pepsico2_Contig3722.path1	novel.1849	novel.4031	novel.6630		Pepsico1_Contig6573.path1	Pepsico2_Contig8305.path1	novel.51	TRINITY_DN2098_c1_g1_i5.path1
novel.7111	TRINITY_DN21996_c0_g1_i1.path1	Pepsico2_Contig748.path1	TRINITY_DN8237_c0_g1_i1.path1		Pepsico2_Contig4870.path1	TRINITY_DN96580_c0_g1_i1.path1	Pepsico2_Contig5887.path1	TRINITY_DN23984_c0_g1_i1.path1
novel.2513	TRINITY_DN15885_c0_g1_i1.path1	TRINITY_DN32288_c0_g3_i1.path1	TRINITY_DN14775_c0_g1_i8.path1		TRINITY_DN17783_c0_g1_i3.path1	TRINITY_DN6632_c0_g2_i1.path1	TRINITY_DN5904_c0_g1_i3.path1	Pepsico1_Contig4053.path1
TRINITY_DN85794_c0_g1_i1.path1	Pepsico2_Contig6237.path1	novel.682	Pepsico2_Contig19350.path1		TRINITY_DN22937_c0_g1_i3.path1	Pepsico2_Contig18121.path1	TRINITY_DN15952_c1_g1_i2.path2	novel.9840
TRINITY_DN101355_c0_g1_i1.path1	TRINITY_DN6979_c0_g1_i6.path1	Pepsico2_Contig19854.path2	novel.3971		TRINITY_DN55690_c1_g1_i1.path1	novel.5378	novel.3578	Pepsico2_Contig17052.path2
TRINITY_DN40225_c0_g1_i1.path2	novel.5849	novel.6131	TRINITY_DN23152_c0_g1_i1.path1		TRINITY_DN15959_c0_g1_i1.path1	TRINITY_DN22732_c0_g2_i3.path1	novel.280	TRINITY_DN11717_c0_g2_i2.path1
TRINITY_DN12408_c2_g1_i1.path1	TRINITY_DN5602_c0_g1_i1.path1	TRINITY_DN16238_c0_g1_i5.path1	TRINITY_DN15198_c0_g1_i2.path1		Pepsico2_Contig19875.path1	novel.560	Pepsico2_Contig14292.path1	novel.3853
Pepsico1_Contig395.path1	TRINITY_DN14489_c0_g1_i1.path1	novel.2234	TRINITY_DN13498_c0_g2_i1.path1		TRINITY_DN39219_c0_g1_i1.path2	TRINITY_DN28038_c0_g1_i1.path1	TRINITY_DN99177_c0_g1_i1.path1	novel.4164
TRINITY_DN20585_c0_g1_i1.path1	novel.8506	TRINITY_DN7223_c0_g1_i5.path1	TRINITY_DN41312_c0_g1_i1.path1		TRINITY_DN18599_c0_g1_i1.path2	novel.3987	Pepsico2_Contig5650.path1	TRINITY_DN22584_c0_g3_i1.path1
TRINITY_DN56173_c0_g1_i1.path1	TRINITY_DN18616_c0_g1_i4.path1	TRINITY_DN28946_c0_g1_i2.path2	novel.6126		novel.2029	novel.7472	TRINITY_DN2210_c0_g2_i3.path1	TRINITY_DN6189_c0_g2_i2.path1
TRINITY_DN20543_c0_g1_i1.path1	TRINITY_DN6929_c1_g1_i4.path1	Pepsico1_Contig3373.path1	novel.4778		novel.6560	TRINITY_DN33878_c0_g1_i2.path1	TRINITY_DN49626_c0_g1_i1.path1	TRINITY_DN5135_c0_g2_i1.path1
novel.5930	Pepsico2_Contig11928.path1	novel.2831	TRINITY_DN2644_c1_g1_i2.path1		TRINITY_DN13319_c0_g2_i3.path1	TRINITY_DN26262_c0_g1_i1.path1	TRINITY_DN39335_c0_g1_i1.path2	novel.1625
novel.6828	TRINITY_DN32288_c0_g3_i1.path1	TRINITY_DN8304_c0_g1_i4.path1	TRINITY_DN19308_c0_g1_i4.path1		Pepsico2_Contig1658.path3	TRINITY_DN30789_c0_g2_i1.path2	TRINITY_DN21918_c0_g1_i3.path1	novel.1011
TRINITY_DN18292_c0_g3_i1.path1	TRINITY_DN9779_c1_g1_i1.path1	Pepsico2_Contig6534.path1	TRINITY_DN9623_c0_g1_i1.path2		TRINITY_DN40534_c0_g2_i1.path1	Pepsico2_Contig344.path2	Pepsico2_Contig2197.path1	Pepsico2_Contig638.path2
TRINITY_DN22584_c0_g2_i1.path1	Pepsico2_Contig16657.path3	novel.3119	novel.8144		TRINITY_DN32774_c0_g1_i1.path1	Pepsico1_Contig1515.path1	TRINITY_DN46714_c0_g1_i1.path1	TRINITY_DN102160_c0_g1_i1.path1
Pepsico2_Contig10148.path1	TRINITY_DN94140_c0_g1_i1.path2	TRINITY_DN7630_c0_g1_i1.path3	TRINITY_DN3731_c0_g2_i1.path1		TRINITY_DN19336_c0_g1_i1.path1	TRINITY_DN36977_c1_g1_i1.path1	TRINITY_DN6907_c0_g1_i2.path1	TRINITY_DN31456_c0_g2_i4.path3
Pepsico2_Contig19859.path1	TRINITY_DN69448_c0_g1_i1.path1	TRINITY_DN21918_c0_g1_i3.path1	TRINITY_DN27456_c0_g1_i1.path1		TRINITY_DN75288_c0_g1_i1.path1	novel.3824	TRINITY_DN10752_c0_g1_i1.path1	Pepsico2_Contig12692.path5
TRINITY_DN97533_c0_g1_i1.path1	novel.7949	TRINITY_DN10280_c0_g1_i1.path1	TRINITY_DN20944_c0_g1_i5.path1		Pepsico2_Contig19268.path3	novel.2029	TRINITY_DN102574_c0_g1_i1.path1	TRINITY_DN429_c0_g1_i1.path1
Pepsico1_Contig47.path1	novel.7060	TRINITY_DN16522_c0_g1_i3.path2	novel.2677		novel.8191	novel.4950	novel.7991	TRINITY_DN24079_c0_g1_i1.path1
TRINITY_DN33568_c0_g5_i1.path1	TRINITY_DN11717_c0_g2_i2.path1	TRINITY_DN685_c1_g2_i1.path2	TRINITY_DN7816_c0_g1_i1.path2		TRINITY_DN976_c0_g1_i2.path2	Pepsico2_Contig6486.path1	novel.4929	TRINITY_DN28946_c0_g1_i2.path2
TRINITY_DN7127_c0_g2_i6.path1	TRINITY_DN26281_c0_g2_i1.path1	TRINITY_DN12639_c0_g1_i6.path1	TRINITY_DN26184_c0_g1_i2.path1		TRINITY_DN10094_c0_g3_i1.path1	Pepsico2_Contig11017.path1	TRINITY_DN7656_c0_g1_i1.path3	novel.3089
novel.1959	novel.9809	TRINITY_DN29271_c0_g1_i2.path3	TRINITY_DN16767_c0_g1_i2.path1		TRINITY_DN11017_c0_g2_i4.path3	Pepsico2_Contig17795.path1	TRINITY_DN23984_c0_g1_i1.path1	TRINITY_DN20889_c1_g1_i1.path1
Pepsico2_Contig19690.path1	novel.503	TRINITY_DN80132_c0_g1_i1.path1	TRINITY_DN14410_c0_g1_i1.path1		TRINITY_DN53496_c0_g1_i1.path1	TRINITY_DN53627_c0_g2_i2.path1	Pepsico2_Contig7517.path2	TRINITY_DN35789_c0_g1_i1.path2
TRINITY_DN78688_c0_g1_i1.path1	TRINITY_DN14061_c0_g3_i2.path1	Pepsico2_Contig971.path1	TRINITY_DN10194_c0_g1_i1.path1		Pepsico1_Contig28290.path1	TRINITY_DN89378_c0_g1_i1.path1	TRINITY_DN7122_c0_g1_i3.path1	TRINITY_DN2173_c0_g1_i1.path1
novel.2029	TRINITY_DN10242_c0_g1_i5.path1	TRINITY_DN2854_c0_g1_i1.path1	TRINITY_DN18228_c0_g1_i4.path1		Pepsico1_Contig6958.path2	TRINITY_DN10166_c0_g1_i1.path1	TRINITY_DN89953_c0_g1_i1.path1	Pepsico1_Contig473.path1
TRINITY_DN15239_c0_g1_i10.path1	novel.9764	Pepsico2_Contig11928.path1	novel.9809		TRINITY_DN24079_c0_g1_i1.path1	TRINITY_DN6150_c0_g1_i3.path1	novel.1959	Pepsico2_Contig7831.path2
Pepsico2_Contig2625.path1	TRINITY_DN15645_c1_g2_i1.path1	novel.7642	TRINITY_DN49612_c0_g1_i1.path1		novel.9345	TRINITY_DN13777_c0_g1_i4.path1	novel.9616	novel.9339
Pepsico1_Contig6573.path1	TRINITY_DN45866_c0_g1_i1.path1	TRINITY_DN18179_c0_g2_i1.path2	TRINITY_DN20762_c0_g1_i1.path1		TRINITY_DN12215_c0_g1_i3.path1	Pepsico1_Contig1511.path1	novel.3116	Pepsico1_Contig1137.path1
TRINITY_DN6929_c1_g1_i4.path1	Pepsico2_Contig9507.path1	novel.9574	TRINITY_DN13705_c0_g3_i1.path2		Pepsico2_Contig7439.path1	novel.6343	Pepsico1_Contig26.path1	Pepsico2_Contig6015.path1
Pepsico2_Contig4084.path1	Pepsico2_Contig6611.path2	novel.3116	TRINITY_DN11128_c0_g1_i8.path1		TRINITY_DN12280_c0_g2_i1.path2	TRINITY_DN3212_c0_g1_i1.path1	TRINITY_DN21556_c0_g1_i1.path2	TRINITY_DN21931_c0_g1_i2.path1
TRINITY_DN16507_c0_g1_i2.path1	TRINITY_DN2185_c0_g1_i8.path1	TRINITY_DN6488_c0_g1_i1.path3	TRINITY_DN16589_c0_g3_i3.path1		novel.5786	novel.4846	TRINITY_DN5235_c0_g2_i1.path1	novel.3987
Pepsico2_Contig3010.path1	Pepsico2_Contig16985.path1	novel.9685	TRINITY_DN2854_c0_g1_i1.path1		TRINITY_DN19696_c0_g1_i3.path1	TRINITY_DN6841_c0_g1_i2.path1	Pepsico2_Contig6839.path1	TRINITY_DN12676_c0_g1_i7.path1
TRINITY_DN38367_c0_g1_i1.path1	novel.9092	TRINITY_DN58751_c0_g1_i1.path1	TRINITY_DN23077_c0_g2_i1.path1		TRINITY_DN25387_c0_g2_i1.path1	TRINITY_DN17122_c0_g1_i2.path1	TRINITY_DN18117_c0_g1_i3.path3	TRINITY_DN15695_c0_g1_i3.path1
novel.3405	Pepsico1_Contig6915.path1	TRINITY_DN17959_c1_g1_i1.path1	TRINITY_DN63191_c0_g1_i1.path1		TRINITY_DN50781_c0_g1_i1.path1	novel.5379	TRINITY_DN2173_c0_g1_i1.path1	TRINITY_DN40354_c0_g1_i2.path1
TRINITY_DN16825_c0_g1_i7.path1	TRINITY_DN14191_c0_g1_i1.path2	TRINITY_DN3153_c0_g3_i2.path1	Pepsico2_Contig19863.path1		TRINITY_DN28435_c0_g1_i6.path2	TRINITY_DN1623_c1_g1_i8.path2	TRINITY_DN18326_c0_g1_i2.path1	TRINITY_DN49626_c0_g1_i1.path1
Pepsico1_Contig1029.path1	TRINITY_DN22584_c1_g1_i1.path1	Pepsico2_Contig12826.path1	Pepsico2_Contig3799.path1		TRINITY_DN7472_c0_g2_i1.path1	novel.2155	Pepsico2_Contig12841.path2	Pepsico1_Contig1934.path2
TRINITY_DN7816_c0_g1_i1.path2	TRINITY_DN43817_c0_g1_i1.path1	Pepsico2_Contig10815.path1	TRINITY_DN26281_c0_g2_i1.path1		Pepsico1_Contig1934.path1	Pepsico1_Contig1649.path1	TRINITY_DN22831_c0_g1_i2.path1	TRINITY_DN36978_c0_g1_i1.path1
Pepsico2_Contig8389.path2	Pepsico2_Contig1496.path1	Pepsico1_Contig34820.path1	TRINITY_DN15455_c0_g1_i7.path1		novel.5200	TRINITY_DN52025_c0_g2_i1.path2	novel.2116	TRINITY_DN11951_c0_g1_i1.path1
Pepsico2_Contig1842.path1	TRINITY_DN52891_c0_g1_i1.path1	novel.1974	Pepsico2_Contig17288.path1		TRINITY_DN11151_c0_g1_i1.path1	TRINITY_DN28303_c0_g1_i1.path2	Pepsico2_Contig11330.path1	TRINITY_DN89139_c0_g1_i1.path1
TRINITY_DN9712_c0_g3_i2.path1	TRINITY_DN9377_c0_g1_i1.path1	TRINITY_DN34811_c1_g1_i1.path1	TRINITY_DN15916_c0_g1_i1.path1		TRINITY_DN3870_c0_g1_i1.path1	TRINITY_DN33313_c0_g2_i2.path1	Pepsico2_Contig16082.path1	TRINITY_DN4714_c0_g1_i9.path1
TRINITY_DN26268_c0_g2_i2.path1	TRINITY_DN5321_c0_g1_i10.path1	Pepsico2_Contig4961.path1	TRINITY_DN58751_c0_g1_i1.path1		TRINITY_DN59441_c0_g1_i2.path1	TRINITY_DN46537_c0_g1_i2.path1	Pepsico2_Contig19649.path1	TRINITY_DN16298_c0_g2_i1.path1
TRINITY_DN2852_c0_g1_i3.path1	TRINITY_DN28511_c0_g1_i5.path1	TRINITY_DN95487_c0_g1_i1.path1	TRINITY_DN23390_c0_g1_i1.path1		TRINITY_DN18638_c0_g3_i1.path1	TRINITY_DN14174_c0_g3_i1.path1	TRINITY_DN9939_c0_g1_i2.path1	novel.1781
Pepsico2_Contig6534.path1	TRINITY_DN10806_c1_g2_i8.path1	Pepsico1_Contig3082.path1	TRINITY_DN19898_c0_g5_i2.path1		Pepsico2_Contig2029.path1	TRINITY_DN14061_c0_g2_i1.path2	TRINITY_DN5602_c0_g1_i1.path1	TRINITY_DN42509_c0_g1_i1.path1
novel.3581	novel.1609	TRINITY_DN42311_c0_g2_i1.path1	Pepsico2_Contig7348.path1		TRINITY_DN22677_c0_g2_i1.path2	novel.10153	TRINITY_DN13609_c0_g1_i3.path1	TRINITY_DN25530_c0_g1_i1.path1
novel.8035	TRINITY_DN88632_c0_g1_i1.path1	TRINITY_DN25461_c0_g1_i1.path1	TRINITY_DN22584_c1_g1_i1.path1		TRINITY_DN22438_c0_g2_i1.path1	Pepsico2_Contig7511.path1	TRINITY_DN16513_c0_g2_i1.path1	novel.10216
TRINITY_DN10547_c0_g1_i17.path1	Pepsico1_Contig195.path1	TRINITY_DN66631_c0_g1_i1.path1	TRINITY_DN5942_c1_g1_i4.path2		TRINITY_DN53274_c0_g1_i1.path1	Pepsico1_Contig521.path1	TRINITY_DN31076_c0_g1_i4.path2	TRINITY_DN15905_c1_g1_i1.path2
TRINITY_DN13350_c0_g1_i1.path1	Pepsico1_Contig37214.path1	TRINITY_DN26281_c0_g2_i1.path1	Pepsico2_Contig20128.path1		TRINITY_DN13777_c0_g1_i4.path1	TRINITY_DN19237_c0_g1_i2.path2	novel.8861	Pepsico2_Contig16783.path1
TRINITY_DN31534_c0_g1_i1.path1	TRINITY_DN18437_c0_g1_i2.path1	Pepsico2_Contig17052.path2	TRINITY_DN43484_c0_g1_i1.path1		Pepsico2_Contig4432.path1	TRINITY_DN9886_c0_g1_i1.path1	Pepsico2_Contig17052.path2	novel.4061
novel.2946	TRINITY_DN4108_c0_g3_i1.path1	TRINITY_DN18292_c0_g3_i1.path1	novel.7138		novel.1989	TRINITY_DN2743_c0_g1_i31.path1	Pepsico1_Contig7138.path1	TRINITY_DN71191_c0_g1_i1.path1
Pepsico2_Contig14675.path1	TRINITY_DN49172_c0_g1_i1.path1	TRINITY_DN4576_c0_g1_i2.path1	TRINITY_DN25287_c0_g3_i1.path1		TRINITY_DN743_c0_g1_i3.path2	TRINITY_DN429_c0_g1_i1.path1	TRINITY_DN5076_c0_g1_i5.path1	TRINITY_DN30113_c0_g1_i1.path1
Pepsico2_Contig19397.path1	novel.4061	TRINITY_DN9779_c1_g1_i1.path1	TRINITY_DN11593_c1_g1_i7.path2		TRINITY_DN56274_c0_g1_i1.path1	TRINITY_DN2365_c0_g1_i15.path1	TRINITY_DN52025_c0_g1_i2.path1	TRINITY_DN10470_c0_g1_i2.path1
TRINITY_DN5220_c0_g1_i1.path1	TRINITY_DN4515_c0_g1_i17.path1	Pepsico2_Contig4693.path1	TRINITY_DN12498_c0_g1_i2.path1		TRINITY_DN80123_c0_g1_i1.path1	Pepsico2_Contig17067.path1	TRINITY_DN4172_c0_g1_i16.path1	TRINITY_DN37342_c0_g2_i1.path1
novel.7193	TRINITY_DN685_c1_g2_i1.path2	novel.9181	TRINITY_DN245_c0_g2_i1.path1		TRINITY_DN4444_c0_g1_i1.path1	TRINITY_DN1459_c0_g2_i3.path1	Pepsico1_Contig35521.path1	novel.9940
novel.8131	TRINITY_DN7412_c0_g1_i1.path1	TRINITY_DN7653_c0_g2_i2.path1	novel.10459		novel.7481	TRINITY_DN10738_c0_g2_i1.path2	TRINITY_DN25061_c0_g1_i2.path1	TRINITY_DN9701_c0_g1_i1.path1
TRINITY_DN97596_c0_g1_i2.path1	TRINITY_DN2554_c0_g1_i11.path2	TRINITY_DN29620_c0_g2_i1.path1	TRINITY_DN16544_c0_g2_i2.path1		TRINITY_DN31531_c1_g1_i1.path1	TRINITY_DN49612_c0_g1_i1.path1	novel.9940	TRINITY_DN112669_c0_g1_i1.path1
TRINITY_DN16495_c0_g1_i1.path2	TRINITY_DN25751_c0_g1_i2.path1	Pepsico2_Contig20350.path1	TRINITY_DN36881_c1_g1_i1.path1		TRINITY_DN23121_c0_g2_i1.path2	TRINITY_DN23649_c0_g1_i2.path2	TRINITY_DN23468_c0_g1_i2.path2	novel.5681
TRINITY_DN1859_c0_g1_i13.path1	TRINITY_DN2210_c0_g1_i2.path1	TRINITY_DN7795_c0_g1_i6.path1	TRINITY_DN80132_c0_g1_i1.path1		TRINITY_DN11154_c0_g3_i1.path1	novel.9258	Pepsico2_Contig6539.path1	TRINITY_DN49612_c0_g1_i1.path1
Pepsico2_Contig14140.path1	TRINITY_DN5076_c0_g1_i5.path1	TRINITY_DN14202_c0_g3_i2.path1	TRINITY_DN10280_c0_g1_i1.path1		TRINITY_DN16102_c0_g1_i2.path1	TRINITY_DN20966_c0_g5_i1.path1	TRINITY_DN5355_c1_g1_i3.path1	novel.9616
TRINITY_DN17530_c0_g1_i1.path3	TRINITY_DN15695_c0_g1_i3.path1	TRINITY_DN8820_c0_g1_i1.path1	TRINITY_DN3664_c0_g2_i1.path1		TRINITY_DN4132_c0_g2_i1.path1	TRINITY_DN22145_c0_g1_i2.path1	TRINITY_DN17710_c0_g2_i2.path1	TRINITY_DN5904_c0_g1_i3.path1
TRINITY_DN29061_c0_g1_i1.path1	TRINITY_DN25461_c0_g1_i1.path1	TRINITY_DN826_c0_g1_i8.path2	novel.5636		TRINITY_DN10806_c1_g3_i2.path1	TRINITY_DN17070_c0_g2_i3.path1	novel.5625	TRINITY_DN245_c0_g2_i1.path1
TRINITY_DN10134_c0_g1_i1.path1	TRINITY_DN19092_c0_g2_i1.path1	TRINITY_DN10301_c1_g1_i3.path1	TRINITY_DN11063_c0_g1_i1.path1		TRINITY_DN23496_c0_g1_i2.path2	TRINITY_DN51929_c0_g1_i1.path1	novel.1447	Pepsico2_Contig17730.path1
TRINITY_DN3075_c1_g1_i2.path2	novel.682	TRINITY_DN33800_c0_g1_i2.path2	Pepsico2_Contig20592.path1		novel.2138	Pepsico2_Contig1309.path1	TRINITY_DN16286_c0_g1_i4.path1	Pepsico1_Contig2677.path1
TRINITY_DN16298_c0_g2_i1.path1	Pepsico2_Contig589.path2	TRINITY_DN3161_c0_g1_i1.path2	Pepsico1_Contig1106.path1		TRINITY_DN40112_c0_g1_i1.path1	novel.5000	TRINITY_DN4879_c0_g2_i1.path1	novel.10172
TRINITY_DN64549_c0_g1_i1.path1	TRINITY_DN10286_c0_g1_i2.path1	TRINITY_DN85435_c0_g1_i1.path1	TRINITY_DN16495_c0_g1_i1.path2		TRINITY_DN21247_c0_g1_i2.path1	TRINITY_DN109183_c0_g1_i1.path1	TRINITY_DN33361_c0_g1_i5.path2	novel.1308
TRINITY_DN97486_c0_g1_i1.path2	Pepsico2_Contig19670.path1	TRINITY_DN16614_c0_g2_i1.path1	Pepsico1_Contig6934.path1		TRINITY_DN14775_c0_g1_i8.path1	TRINITY_DN10048_c0_g1_i2.path1	Pepsico2_Contig15617.path1	novel.7557
TRINITY_DN1945_c0_g1_i3.path1	TRINITY_DN52537_c0_g1_i1.path1	TRINITY_DN1019_c0_g2_i1.path2	TRINITY_DN28819_c0_g1_i1.path1		TRINITY_DN22196_c0_g3_i1.path1	novel.5248	TRINITY_DN20775_c0_g1_i3.path2	TRINITY_DN33313_c0_g2_i2.path1
Pepsico2_Contig6237.path2	novel.9464	TRINITY_DN28930_c0_g2_i2.path1	TRINITY_DN11593_c3_g1_i1.path1		Pepsico2_Contig7773.path2	Pepsico2_Contig781.path1	TRINITY_DN13217_c0_g1_i1.path1	TRINITY_DN14533_c0_g1_i4.path2
TRINITY_DN36977_c1_g1_i1.path1	TRINITY_DN42615_c0_g1_i3.path1	novel.877	Pepsico2_Contig6569.path1		TRINITY_DN8652_c0_g1_i6.path1	TRINITY_DN97541_c0_g1_i1.path1	TRINITY_DN20133_c0_g1_i3.path2	novel.42
Pepsico2_Contig17090.path2	TRINITY_DN21918_c0_g1_i3.path1	Pepsico1_Contig421.path1	TRINITY_DN8820_c0_g1_i1.path1		Pepsico1_Contig3446.path1	TRINITY_DN553_c0_g3_i1.path1	TRINITY_DN38078_c0_g1_i1.path1	TRINITY_DN10981_c1_g1_i2.path1
TRINITY_DN11128_c0_g1_i8.path1	novel.2117	novel.4631	TRINITY_DN17301_c0_g1_i1.path1		Pepsico2_Contig16793.path1	TRINITY_DN90920_c0_g1_i1.path1	novel.4663	Pepsico1_Contig2378.path1
TRINITY_DN12913_c0_g1_i2.path2	TRINITY_DN17775_c0_g2_i1.path1	Pepsico2_Contig19859.path1	Pepsico1_Contig32727.path2		TRINITY_DN26545_c0_g1_i1.path1	TRINITY_DN5721_c0_g1_i1.path1	TRINITY_DN1201_c0_g1_i3.path1	Pepsico1_Contig910.path1
Pepsico2_Contig10688.path1	Pepsico1_Contig7138.path1	TRINITY_DN42400_c4_g1_i1.path1	novel.8600		Pepsico2_Contig13855.path1	TRINITY_DN78422_c0_g1_i2.path1	TRINITY_DN9693_c0_g1_i7.path1	TRINITY_DN28946_c0_g1_i2.path1
novel.4121	Pepsico2_Contig12826.path1	novel.8682	TRINITY_DN3153_c0_g3_i2.path1		Pepsico2_Contig19452.path1	novel.5549	TRINITY_DN1583_c0_g1_i1.path1	Pepsico2_Contig748.path1
TRINITY_DN26045_c0_g1_i4.path1	TRINITY_DN24524_c0_g1_i2.path1	TRINITY_DN10738_c0_g2_i1.path1	novel.5395		Pepsico2_Contig12129.path1	TRINITY_DN8375_c1_g1_i2.path1	TRINITY_DN35_c0_g2_i1.path1	Pepsico2_Contig13425.path1
novel.3437	Pepsico2_Contig17968.path1	Pepsico2_Contig12716.path1	TRINITY_DN24498_c0_g1_i2.path1		TRINITY_DN29796_c0_g1_i1.path1	novel.9967	TRINITY_DN3986_c0_g1_i1.path1	novel.6249
TRINITY_DN91049_c0_g1_i1.path2	Pepsico2_Contig17023.path1	Pepsico2_Contig6897.path1	novel.2117		TRINITY_DN29329_c0_g2_i1.path1	novel.5395	novel.9974	TRINITY_DN80132_c0_g1_i1.path1
TRINITY_DN12659_c0_g1_i5.path1	TRINITY_DN2173_c0_g1_i1.path1	TRINITY_DN1695_c0_g2_i7.path2	Pepsico1_Contig2049.path1		TRINITY_DN47580_c1_g1_i1.path1	Pepsico2_Contig19452.path1	TRINITY_DN34253_c0_g1_i1.path1	Pepsico2_Contig19415.path2
novel.2274	TRINITY_DN21607_c0_g3_i3.path1	Pepsico2_Contig10146.path1	Pepsico2_Contig10146.path1		TRINITY_DN70647_c0_g1_i1.path1	Pepsico2_Contig13855.path1	TRINITY_DN32319_c0_g1_i1.path1	novel.4995
Pepsico2_Contig6346.path1	TRINITY_DN26408_c0_g1_i1.path1	Pepsico2_Contig9040.path1	novel.8002		TRINITY_DN6441_c0_g1_i2.path2	novel.1402	Pepsico2_Contig20597.path2	TRINITY_DN106494_c0_g1_i1.path1
Pepsico1_Contig4382.path1	TRINITY_DN16937_c0_g1_i1.path2	TRINITY_DN32381_c0_g1_i1.path1	TRINITY_DN38115_c0_g1_i1.path1		TRINITY_DN2518_c0_g1_i3.path1	novel.7460	novel.8042	Pepsico2_Contig5930.path2
TRINITY_DN6365_c0_g1_i3.path1	novel.380	TRINITY_DN19578_c0_g2_i1.path1	novel.9447		novel.729	Pepsico1_Contig4914.path1	novel.9339	Pepsico2_Contig12826.path1
TRINITY_DN33800_c0_g1_i2.path2	TRINITY_DN19732_c1_g1_i2.path1	Pepsico2_Contig7773.path1	TRINITY_DN39623_c0_g1_i1.path2		TRINITY_DN18478_c0_g1_i1.path1	TRINITY_DN36154_c0_g1_i3.path1	Pepsico2_Contig11122.path1	TRINITY_DN15240_c0_g1_i3.path1
Pepsico2_Contig16982.path1	Pepsico2_Contig17149.path2	TRINITY_DN94969_c0_g1_i1.path1	TRINITY_DN31456_c0_g2_i4.path3		TRINITY_DN15092_c0_g1_i1.path1	novel.2116	TRINITY_DN62134_c5_g1_i1.path1	TRINITY_DN28026_c0_g1_i1.path1
Pepsico2_Contig17803.path1	Pepsico1_Contig1896.path1	Pepsico1_Contig37083.path1	TRINITY_DN112669_c0_g1_i1.path1		Pepsico2_Contig14733.path1	TRINITY_DN21357_c0_g1_i1.path1	Pepsico2_Contig19467.path1	novel.1301
TRINITY_DN16391_c0_g1_i1.path1	TRINITY_DN33625_c0_g1_i1.path2	TRINITY_DN26560_c0_g2_i1.path1	TRINITY_DN4474_c1_g2_i1.path1		TRINITY_DN27955_c0_g1_i1.path1	novel.7557	TRINITY_DN11163_c1_g2_i1.path1	Pepsico2_Contig20597.path2
TRINITY_DN25207_c0_g2_i3.path1	TRINITY_DN107312_c0_g1_i1.path1	Pepsico2_Contig19397.path1	novel.4764		Pepsico2_Contig7517.path2	novel.10237	Pepsico2_Contig9102.path1	TRINITY_DN48202_c0_g1_i2.path1
TRINITY_DN11349_c0_g1_i2.path1	Pepsico1_Contig552.path1	TRINITY_DN12913_c0_g1_i2.path1	TRINITY_DN51712_c0_g1_i1.path1		TRINITY_DN11349_c0_g1_i2.path2	novel.5350	TRINITY_DN9750_c0_g1_i6.path1	TRINITY_DN10752_c0_g1_i1.path2
TRINITY_DN50361_c0_g1_i1.path1	novel.7783	novel.8801	TRINITY_DN11768_c0_g1_i1.path1		TRINITY_DN19900_c0_g2_i1.path1	novel.857	Pepsico2_Contig3750.path2	TRINITY_DN9779_c1_g1_i1.path1
Pepsico1_Contig5866.path2	TRINITY_DN18524_c0_g1_i1.path1	TRINITY_DN4474_c1_g2_i1.path1	Pepsico2_Contig17058.path1		TRINITY_DN23712_c0_g3_i1.path1	TRINITY_DN78849_c0_g1_i1.path1	novel.651	Pepsico2_Contig8305.path1
novel.4694	TRINITY_DN18179_c0_g2_i1.path2	Pepsico1_Contig5048.path1	Pepsico1_Contig37214.path1		TRINITY_DN20489_c0_g1_i1.path1	TRINITY_DN11328_c0_g1_i1.path1	novel.2368	novel.662
TRINITY_DN976_c0_g1_i2.path2	Pepsico1_Contig34820.path1	TRINITY_DN9612_c0_g1_i1.path2	TRINITY_DN49793_c0_g1_i6.path1		TRINITY_DN60733_c0_g1_i1.path1	Pepsico2_Contig14991.path1	TRINITY_DN9701_c0_g1_i1.path1	TRINITY_DN8084_c0_g1_i5.path1
TRINITY_DN19179_c0_g1_i3.path2	TRINITY_DN931_c0_g2_i2.path1	novel.6885	Pepsico1_Contig35904.path3		TRINITY_DN97402_c0_g1_i1.path1	Pepsico2_Contig11409.path1	novel.4643	TRINITY_DN826_c0_g1_i8.path2
TRINITY_DN42186_c0_g2_i1.path1	novel.7396	Pepsico1_Contig1252.path1	TRINITY_DN42311_c0_g2_i1.path1		TRINITY_DN2098_c0_g2_i1.path1	TRINITY_DN30899_c0_g2_i1.path1	TRINITY_DN108478_c0_g1_i1.path4	TRINITY_DN6139_c0_g2_i2.path1
Pepsico1_Contig1024.path1	TRINITY_DN11760_c0_g1_i2.path1	Pepsico2_Contig3611.path1	TRINITY_DN10932_c1_g1_i1.path1		TRINITY_DN11147_c0_g1_i1.path1	novel.829	novel.5681	novel.6126
Pepsico2_Contig3832.path2	TRINITY_DN5816_c0_g1_i8.path1	TRINITY_DN23077_c0_g2_i1.path1	TRINITY_DN16421_c0_g1_i9.path1		Pepsico2_Contig20139.path1	TRINITY_DN2467_c0_g1_i3.path1	TRINITY_DN13270_c0_g1_i2.path1	TRINITY_DN7656_c0_g1_i1.path3
Pepsico2_Contig11330.path1	TRINITY_DN11017_c0_g2_i4.path3	novel.2582	TRINITY_DN966_c0_g2_i3.path1		novel.8819	TRINITY_DN15272_c0_g2_i1.path1	novel.4904	TRINITY_DN6454_c0_g2_i1.path2
TRINITY_DN59825_c0_g1_i1.path1	TRINITY_DN33625_c0_g1_i1.path1	novel.5395	TRINITY_DN11450_c3_g1_i1.path1		TRINITY_DN14002_c0_g1_i6.path1	Pepsico1_Contig7006.path1	TRINITY_DN27955_c0_g1_i1.path1	TRINITY_DN94140_c0_g1_i1.path2
TRINITY_DN33313_c0_g2_i2.path1	TRINITY_DN12947_c0_g1_i4.path1	TRINITY_DN5931_c0_g1_i7.path1	Pepsico1_Contig1880.path1		TRINITY_DN45843_c0_g1_i1.path2	TRINITY_DN54245_c0_g1_i1.path1	TRINITY_DN10437_c0_g1_i2.path1	TRINITY_DN28819_c0_g1_i1.path1
TRINITY_DN11083_c0_g1_i15.path1	novel.8351	novel.1622	novel.1155		TRINITY_DN19760_c0_g1_i2.path2	Pepsico2_Contig14530.path1	novel.1098	Pepsico2_Contig2029.path1
Pepsico2_Contig17058.path1	novel.2030	TRINITY_DN13705_c0_g3_i1.path2	TRINITY_DN4477_c0_g1_i1.path1		TRINITY_DN40802_c0_g3_i1.path2	TRINITY_DN19722_c0_g1_i1.path1	Pepsico2_Contig4717.path1	TRINITY_DN34417_c0_g2_i1.path1
Pepsico2_Contig1104.path1	Pepsico2_Contig5887.path1	TRINITY_DN32584_c0_g1_i1.path1	TRINITY_DN20815_c0_g2_i1.path1		novel.1785	Pepsico2_Contig2625.path1	novel.1576	Pepsico2_Contig8195.path1
Pepsico2_Contig17522.path1	novel.7569	TRINITY_DN31147_c0_g1_i1.path1	Pepsico2_Contig3611.path1		Pepsico2_Contig9173.path1	TRINITY_DN5010_c0_g1_i1.path1	Pepsico2_Contig7517.path1	TRINITY_DN9647_c0_g1_i4.path1
novel.3694	novel.8801	Pepsico1_Contig171.path1	TRINITY_DN24358_c0_g1_i5.path1		Pepsico2_Contig17057.path1	TRINITY_DN19468_c0_g2_i2.path1	TRINITY_DN27112_c0_g3_i3.path1	Pepsico2_Contig4402.path1
novel.8910	Pepsico2_Contig12412.path1	TRINITY_DN308_c0_g1_i1.path1	TRINITY_DN27890_c0_g1_i1.path1		Pepsico2_Contig6858.path1	novel.4924	TRINITY_DN14933_c0_g3_i1.path2	novel.5395
TRINITY_DN14238_c1_g1_i1.path1	TRINITY_DN11181_c0_g1_i3.path1	Pepsico2_Contig12308.path2	novel.10016		TRINITY_DN8789_c0_g2_i3.path1	Pepsico1_Contig1307.path1	novel.682	TRINITY_DN1779_c0_g1_i10.path1
Pepsico2_Contig8532.path2	TRINITY_DN20769_c0_g1_i1.path2	TRINITY_DN5355_c1_g1_i3.path1	TRINITY_DN14202_c3_g1_i1.path1		TRINITY_DN8599_c1_g1_i3.path2	Pepsico2_Contig3832.path2	TRINITY_DN88632_c0_g1_i1.path1	TRINITY_DN22584_c1_g1_i1.path1
Pepsico2_Contig18269.path1	TRINITY_DN4504_c1_g2_i1.path1	TRINITY_DN9377_c0_g1_i1.path1	TRINITY_DN8648_c0_g1_i4.path2		Pepsico2_Contig11065.path1	novel.2119	novel.5132	novel.2274
TRINITY_DN16572_c0_g2_i2.path2	TRINITY_DN3106_c1_g1_i1.path1	Pepsico2_Contig19393.path1	Pepsico2_Contig8440.path1		TRINITY_DN8121_c0_g1_i8.path1	novel.4995	Pepsico2_Contig4804.path1	novel.2454
TRINITY_DN20290_c0_g1_i2.path1	Pepsico2_Contig16029.path1	novel.8861	TRINITY_DN4150_c1_g1_i1.path1		TRINITY_DN19139_c0_g1_i1.path1	TRINITY_DN14014_c0_g3_i1.path1	novel.9427	novel.9142
TRINITY_DN2098_c0_g2_i1.path1	TRINITY_DN13249_c0_g2_i1.path1	TRINITY_DN2450_c1_g2_i1.path1	TRINITY_DN49479_c0_g1_i1.path1		novel.4397	TRINITY_DN16298_c0_g2_i1.path1	TRINITY_DN1201_c2_g1_i2.path1	TRINITY_DN37761_c0_g1_i1.path1
Pepsico2_Contig17264.path1	TRINITY_DN10178_c0_g2_i5.path1	novel.6927	Pepsico2_Contig6405.path1		TRINITY_DN29582_c0_g6_i1.path1	TRINITY_DN12164_c0_g1_i1.path1	Pepsico2_Contig10630.path1	novel.8002
novel.2121	TRINITY_DN30131_c0_g1_i2.path1	Pepsico1_Contig32296.path2	TRINITY_DN3635_c0_g1_i2.path1		TRINITY_DN5721_c0_g1_i1.path1	Pepsico1_Contig2556.path1	TRINITY_DN5135_c0_g1_i1.path1	TRINITY_DN20622_c0_g1_i4.path1
novel.7357	Pepsico2_Contig17794.path1	TRINITY_DN10806_c1_g2_i8.path1	novel.2023		TRINITY_DN79283_c0_g1_i1.path1	novel.8383	TRINITY_DN6454_c0_g2_i1.path1	TRINITY_DN27339_c0_g1_i1.path1
TRINITY_DN16330_c0_g1_i2.path2	TRINITY_DN4027_c0_g5_i1.path1	Pepsico2_Contig17537.path1	TRINITY_DN6390_c0_g1_i3.path1		TRINITY_DN6133_c4_g1_i1.path1	TRINITY_DN7472_c0_g2_i1.path1	Pepsico2_Contig3315.path1	TRINITY_DN18259_c0_g1_i1.path1
TRINITY_DN21717_c0_g1_i1.path2	TRINITY_DN7653_c0_g2_i2.path1	TRINITY_DN35_c0_g2_i1.path1	novel.2946		TRINITY_DN29419_c0_g3_i1.path1	TRINITY_DN29865_c0_g1_i1.path2	novel.1377	TRINITY_DN32638_c0_g1_i1.path1
Pepsico1_Contig6523.path1	TRINITY_DN21931_c0_g1_i2.path1	TRINITY_DN14383_c0_g2_i2.path1	TRINITY_DN8445_c0_g2_i1.path1		Pepsico2_Contig9370.path1	Pepsico2_Contig452.path1	TRINITY_DN26760_c0_g1_i1.path1	novel.7730
Pepsico1_Contig473.path1	novel.4121	TRINITY_DN103372_c0_g1_i1.path1	TRINITY_DN17962_c1_g1_i1.path2		Pepsico2_Contig20315.path2	Pepsico1_Contig5244.path1	novel.7357	TRINITY_DN4456_c0_g2_i10.path2
TRINITY_DN63863_c0_g1_i1.path1	Pepsico2_Contig12299.path1	TRINITY_DN15475_c0_g1_i1.path1	TRINITY_DN15185_c0_g3_i5.path1		Pepsico2_Contig20286.path1	Pepsico2_Contig2004.path2	TRINITY_DN40344_c0_g1_i1.path1	novel.10240
TRINITY_DN89373_c0_g1_i1.path1	novel.742	TRINITY_DN27969_c0_g2_i1.path1	TRINITY_DN18829_c1_g1_i1.path2		Pepsico2_Contig5608.path2	Pepsico2_Contig8599.path1	TRINITY_DN29865_c0_g1_i1.path2	TRINITY_DN102574_c0_g1_i1.path1
TRINITY_DN17397_c0_g1_i2.path1	Pepsico2_Contig12155.path1	TRINITY_DN582_c2_g1_i6.path3	novel.8536		TRINITY_DN7311_c0_g1_i1.path1	Pepsico2_Contig1781.path1	novel.7636	TRINITY_DN21607_c0_g3_i3.path1
novel.23	Pepsico2_Contig1781.path1	TRINITY_DN1803_c3_g1_i1.path1	Pepsico1_Contig29103.path2		Pepsico2_Contig10959.path1	TRINITY_DN11150_c0_g1_i1.path1	Pepsico1_Contig7006.path1	Pepsico2_Contig14558.path1
TRINITY_DN18880_c0_g1_i13.path1	TRINITY_DN10738_c0_g2_i1.path1	TRINITY_DN78535_c0_g1_i1.path1	novel.7498		Pepsico2_Contig15309.path1	TRINITY_DN22824_c0_g2_i1.path1	TRINITY_DN35789_c0_g1_i1.path2	TRINITY_DN7122_c0_g1_i3.path1
TRINITY_DN57133_c0_g1_i1.path1	TRINITY_DN32381_c0_g1_i1.path1	novel.3360	TRINITY_DN11938_c0_g1_i1.path1		TRINITY_DN7780_c1_g3_i1.path1	TRINITY_DN40112_c0_g1_i1.path1	TRINITY_DN10853_c0_g1_i1.path1	novel.1260
TRINITY_DN58751_c0_g1_i1.path1	TRINITY_DN4225_c0_g1_i11.path1	TRINITY_DN92652_c0_g1_i1.path1	Pepsico2_Contig11928.path1		novel.5379	TRINITY_DN4132_c0_g2_i1.path1	Pepsico2_Contig7718.path1	Pepsico2_Contig14825.path1
TRINITY_DN90569_c0_g1_i1.path1	TRINITY_DN16228_c0_g1_i5.path1	Pepsico2_Contig7656.path1	Pepsico2_Contig12261.path1		novel.9724	TRINITY_DN22196_c0_g3_i1.path1	novel.3089	Pepsico2_Contig19613.path1
TRINITY_DN28245_c0_g2_i1.path1	TRINITY_DN29788_c0_g1_i1.path1	TRINITY_DN54627_c0_g1_i1.path1	TRINITY_DN37339_c0_g1_i2.path1		TRINITY_DN18203_c0_g2_i1.path1	TRINITY_DN42509_c0_g2_i1.path1	TRINITY_DN31456_c0_g2_i4.path3	TRINITY_DN10547_c0_g1_i17.path1
TRINITY_DN14174_c0_g3_i1.path1	TRINITY_DN33047_c0_g3_i1.path1	TRINITY_DN24042_c0_g1_i2.path1	TRINITY_DN10806_c1_g2_i8.path1		TRINITY_DN24494_c0_g1_i1.path1	TRINITY_DN21547_c0_g2_i1.path1	Pepsico2_Contig17288.path1	TRINITY_DN25120_c0_g1_i1.path1
TRINITY_DN1968_c0_g1_i4.path2	Pepsico2_Contig12739.path1	TRINITY_DN21405_c1_g1_i7.path1	TRINITY_DN5970_c2_g1_i1.path1		TRINITY_DN41297_c0_g1_i1.path1	TRINITY_DN9939_c0_g1_i2.path1	TRINITY_DN9040_c0_g1_i1.path1	TRINITY_DN10280_c0_g1_i1.path1
TRINITY_DN68790_c0_g1_i1.path1	Pepsico2_Contig20608.path1	TRINITY_DN25287_c0_g3_i1.path1	Pepsico2_Contig20349.path1		TRINITY_DN16825_c2_g1_i1.path1	novel.1560	TRINITY_DN6144_c0_g2_i2.path1	TRINITY_DN10166_c0_g1_i1.path1
TRINITY_DN410_c2_g1_i8.path2	TRINITY_DN11525_c0_g1_i21.path1	TRINITY_DN22549_c0_g2_i1.path1	Pepsico1_Contig636.path1		TRINITY_DN34245_c0_g1_i1.path1	TRINITY_DN35060_c1_g1_i1.path1	TRINITY_DN14827_c0_g1_i1.path1	novel.9972
novel.9373	TRINITY_DN19368_c0_g1_i7.path1	TRINITY_DN60652_c0_g1_i1.path1	TRINITY_DN109491_c0_g1_i1.path1		TRINITY_DN25488_c0_g1_i10.path2	novel.4061	novel.7029	TRINITY_DN19468_c0_g2_i2.path1
novel.9425	TRINITY_DN11509_c0_g1_i7.path1	TRINITY_DN19732_c1_g1_i2.path1	TRINITY_DN23077_c0_g2_i1.path2		TRINITY_DN29271_c0_g1_i2.path3	TRINITY_DN99982_c0_g1_i1.path2	TRINITY_DN65510_c0_g1_i1.path1	novel.4846
novel.6691	Pepsico2_Contig550.path1	TRINITY_DN15185_c0_g3_i5.path1	Pepsico2_Contig7773.path1		novel.3878	Pepsico2_Contig4152.path1	novel.5863	TRINITY_DN29865_c0_g1_i1.path2
Pepsico1_Contig2405.path1	novel.5248	TRINITY_DN2354_c0_g1_i4.path2	TRINITY_DN11785_c1_g1_i1.path1		TRINITY_DN100588_c0_g1_i1.path1	TRINITY_DN48202_c0_g1_i2.path1	novel.672	TRINITY_DN21686_c1_g1_i1.path1
TRINITY_DN15455_c0_g1_i7.path3	Pepsico1_Contig31958.path1	TRINITY_DN7816_c0_g1_i1.path2	novel.2457		TRINITY_DN4419_c0_g1_i1.path1	novel.7636	TRINITY_DN26281_c0_g2_i1.path1	Pepsico2_Contig12502.path1
novel.6885	TRINITY_DN18491_c0_g1_i3.path1	TRINITY_DN51712_c0_g1_i1.path1	novel.7165		TRINITY_DN108492_c0_g1_i1.path1	TRINITY_DN32389_c0_g1_i1.path1	TRINITY_DN79263_c0_g1_i1.path1	TRINITY_DN36995_c0_g2_i1.path1
TRINITY_DN8945_c0_g1_i3.path1	novel.4474	TRINITY_DN12947_c0_g1_i4.path1	TRINITY_DN10932_c1_g2_i2.path1		TRINITY_DN59863_c0_g1_i1.path1	novel.3716	novel.4577	Pepsico2_Contig5536.path1
TRINITY_DN84840_c0_g1_i1.path1	TRINITY_DN6454_c0_g2_i1.path1	TRINITY_DN29096_c0_g1_i9.path1	Pepsico1_Contig32296.path2		TRINITY_DN30899_c0_g2_i1.path1	TRINITY_DN19900_c0_g2_i1.path1	Pepsico2_Contig15498.path1	TRINITY_DN17095_c0_g1_i2.path1
TRINITY_DN76691_c0_g1_i1.path1	TRINITY_DN15916_c0_g1_i1.path1	novel.2798	TRINITY_DN28145_c0_g2_i3.path1		Pepsico2_Contig19695.path1	TRINITY_DN88385_c0_g1_i1.path1	TRINITY_DN102479_c0_g1_i1.path1	TRINITY_DN1139_c0_g1_i1.path1
Pepsico2_Contig11033.path1	TRINITY_DN3161_c0_g1_i1.path1	novel.5849	novel.3461		Pepsico2_Contig17145.path1	novel.1011	Pepsico2_Contig17023.path1	TRINITY_DN40776_c0_g1_i1.path1
TRINITY_DN15885_c0_g1_i1.path2	Pepsico1_Contig71.path1	TRINITY_DN40354_c0_g1_i2.path1	TRINITY_DN11282_c1_g2_i1.path1		TRINITY_DN3985_c0_g1_i1.path3	novel.4697	TRINITY_DN26976_c0_g1_i3.path1	TRINITY_DN71899_c0_g1_i2.path1
Pepsico2_Contig4677.path1	TRINITY_DN22560_c0_g1_i4.path1	TRINITY_DN59616_c0_g1_i1.path1	novel.8711		novel.2108	novel.672	novel.3716	TRINITY_DN16513_c0_g1_i5.path1
TRINITY_DN42903_c0_g1_i1.path2	TRINITY_DN4502_c2_g1_i1.path1	Pepsico1_Contig35904.path3	TRINITY_DN14904_c0_g1_i1.path1		TRINITY_DN32850_c0_g1_i2.path1	TRINITY_DN18259_c0_g1_i1.path1	TRINITY_DN10530_c0_g1_i3.path1	novel.7513
TRINITY_DN42903_c0_g1_i1.path1	TRINITY_DN8929_c0_g1_i2.path1	TRINITY_DN20994_c0_g1_i1.path2	Pepsico2_Contig8620.path1		TRINITY_DN103192_c0_g1_i1.path1	TRINITY_DN31787_c0_g1_i2.path2	Pepsico2_Contig11432.path1	TRINITY_DN33391_c0_g1_i1.path1
TRINITY_DN9154_c0_g2_i1.path1	TRINITY_DN79890_c0_g1_i1.path1	TRINITY_DN618_c0_g1_i2.path1	TRINITY_DN95487_c0_g1_i1.path1		novel.5000	TRINITY_DN38078_c0_g1_i1.path1	novel.6472	TRINITY_DN35164_c0_g1_i1.path2
Pepsico2_Contig17718.path1	TRINITY_DN89378_c0_g1_i1.path1	TRINITY_DN96972_c0_g1_i1.path1	novel.8861		TRINITY_DN16015_c0_g1_i1.path1	novel.3126	novel.7604	TRINITY_DN101698_c0_g1_i1.path1
TRINITY_DN826_c0_g1_i8.path2	Pepsico2_Contig6346.path1	TRINITY_DN49793_c0_g1_i6.path1	Pepsico2_Contig1759.path1		Pepsico2_Contig17816.path1	TRINITY_DN88632_c0_g1_i1.path1	TRINITY_DN9230_c0_g1_i2.path2	Pepsico2_Contig651.path2
TRINITY_DN8820_c0_g1_i1.path1	TRINITY_DN38122_c0_g1_i1.path1	TRINITY_DN19086_c0_g1_i2.path1	TRINITY_DN9377_c0_g1_i1.path1		TRINITY_DN37672_c0_g1_i1.path1	Pepsico2_Contig1842.path1	novel.1513	TRINITY_DN1968_c0_g1_i4.path2
TRINITY_DN38626_c0_g3_i1.path1	Pepsico2_Contig9016.path1	Pepsico2_Contig17216.path1	Pepsico1_Contig421.path1		TRINITY_DN83476_c0_g1_i1.path1	TRINITY_DN80123_c0_g1_i1.path1	Pepsico1_Contig638.path1	TRINITY_DN79513_c0_g1_i1.path1
TRINITY_DN27067_c1_g1_i1.path1	TRINITY_DN84072_c0_g1_i1.path1	TRINITY_DN13254_c1_g1_i1.path1	TRINITY_DN26427_c0_g1_i1.path1		Pepsico2_Contig3621.path1	Pepsico2_Contig7109.path1	TRINITY_DN35910_c0_g1_i1.path1	novel.8808
TRINITY_DN876_c1_g3_i3.path1	Pepsico2_Contig4402.path1	TRINITY_DN555_c0_g1_i2.path1	TRINITY_DN102365_c0_g1_i1.path1		TRINITY_DN65595_c0_g1_i1.path1	novel.6254	novel.1958	novel.8257
TRINITY_DN19578_c0_g2_i1.path1	TRINITY_DN42400_c4_g1_i1.path1	Pepsico2_Contig638.path2	TRINITY_DN25442_c0_g1_i1.path1		novel.6018	TRINITY_DN22030_c0_g1_i4.path2	Pepsico1_Contig6629.path1	novel.2117
TRINITY_DN29732_c0_g1_i1.path1	novel.5152	TRINITY_DN29528_c0_g1_i1.path1	TRINITY_DN21253_c0_g5_i1.path1		TRINITY_DN22584_c0_g3_i1.path1	TRINITY_DN21259_c0_g1_i1.path1	TRINITY_DN32349_c0_g1_i2.path1	novel.1993
TRINITY_DN28145_c0_g2_i3.path1	novel.5614	TRINITY_DN14012_c0_g1_i1.path2	TRINITY_DN12406_c0_g1_i3.path2		novel.3330	TRINITY_DN5232_c0_g1_i7.path1	Pepsico2_Contig13865.path1	novel.8916
Pepsico2_Contig13220.path1	Pepsico1_Contig601.path1	TRINITY_DN11593_c1_g2_i1.path1	TRINITY_DN87534_c0_g1_i1.path1		TRINITY_DN15375_c0_g1_i2.path1	TRINITY_DN11593_c1_g2_i1.path1	novel.1005	TRINITY_DN46714_c0_g1_i1.path1
Pepsico2_Contig8026.path1	TRINITY_DN13715_c0_g1_i1.path1	TRINITY_DN45971_c0_g1_i3.path1	TRINITY_DN16298_c0_g2_i1.path1		TRINITY_DN24907_c0_g2_i1.path1	TRINITY_DN32968_c0_g1_i1.path1	TRINITY_DN9154_c0_g2_i1.path1	TRINITY_DN648_c1_g1_i8.path2
novel.5685	Pepsico2_Contig3799.path1	novel.5461	TRINITY_DN20167_c1_g1_i1.path1		novel.2119	novel.3578	novel.5900	novel.3578
TRINITY_DN11238_c0_g1_i1.path1	TRINITY_DN9385_c2_g2_i1.path1	novel.7067	TRINITY_DN25012_c0_g2_i2.path1		Pepsico2_Contig16903.path1	novel.6689	novel.4958	TRINITY_DN1803_c3_g1_i1.path1
TRINITY_DN17392_c0_g1_i4.path1	TRINITY_DN16513_c0_g2_i1.path1	TRINITY_DN34417_c0_g2_i1.path1	TRINITY_DN9030_c0_g4_i1.path1		TRINITY_DN50814_c0_g1_i6.path1	TRINITY_DN25120_c0_g1_i1.path1	TRINITY_DN3634_c0_g1_i4.path1	TRINITY_DN976_c0_g1_i2.path2
TRINITY_DN44436_c1_g1_i1.path1	TRINITY_DN53169_c0_g1_i1.path2	Pepsico2_Contig651.path2	TRINITY_DN8929_c0_g1_i2.path1		TRINITY_DN20219_c0_g1_i9.path3	TRINITY_DN876_c1_g2_i3.path1	TRINITY_DN475_c0_g1_i14.path1	TRINITY_DN5010_c0_g1_i1.path1
TRINITY_DN17737_c1_g1_i1.path1	TRINITY_DN59616_c0_g1_i1.path1	novel.8580	novel.6995		TRINITY_DN40458_c0_g1_i6.path1	TRINITY_DN57296_c0_g1_i1.path1	TRINITY_DN652_c0_g1_i1.path1	novel.2234
TRINITY_DN19939_c0_g1_i4.path1	TRINITY_DN10547_c0_g1_i17.path1	TRINITY_DN8445_c0_g1_i4.path2	novel.2086		novel.4182	Pepsico2_Contig19412.path1	TRINITY_DN27335_c0_g1_i1.path1	TRINITY_DN32075_c0_g5_i3.path1
TRINITY_DN40378_c0_g2_i2.path2	novel.2845	TRINITY_DN44751_c0_g1_i1.path1	Pepsico2_Contig7195.path2		Pepsico2_Contig15475.path2	novel.8764	novel.6730	TRINITY_DN10806_c1_g2_i8.path1
TRINITY_DN32487_c0_g1_i2.path1	TRINITY_DN28712_c0_g1_i1.path1	novel.994	TRINITY_DN10286_c0_g1_i2.path1		TRINITY_DN100353_c0_g1_i1.path1	Pepsico1_Contig1620.path2	TRINITY_DN16614_c0_g2_i1.path1	TRINITY_DN13830_c1_g1_i1.path1
TRINITY_DN15885_c0_g1_i1.path1	Pepsico2_Contig19525.path1	TRINITY_DN20691_c0_g2_i1.path2	novel.4671		TRINITY_DN8322_c0_g1_i1.path1	TRINITY_DN25186_c0_g1_i1.path1	novel.751	novel.10112
TRINITY_DN19157_c0_g1_i5.path1	Pepsico2_Contig17537.path1	novel.1757	TRINITY_DN78535_c0_g1_i1.path1		TRINITY_DN72136_c0_g1_i1.path1	TRINITY_DN40419_c0_g1_i1.path1	novel.6786	Pepsico2_Contig19238.path1
novel.9707	novel.7047	TRINITY_DN24498_c0_g1_i2.path1	TRINITY_DN90340_c0_g1_i1.path1		Pepsico2_Contig3011.path2	Pepsico2_Contig19525.path2	Pepsico2_Contig17842.path1	TRINITY_DN88632_c0_g1_i1.path1
TRINITY_DN26200_c0_g1_i1.path1	TRINITY_DN4789_c0_g1_i1.path3	TRINITY_DN8291_c1_g3_i8.path1	TRINITY_DN7209_c0_g1_i10.path1		TRINITY_DN530_c0_g1_i3.path1	novel.7810	novel.3853	novel.678
novel.9492	Pepsico2_Contig4423.path1	Pepsico2_Contig7277.path2	novel.6293		TRINITY_DN22503_c0_g1_i1.path1	TRINITY_DN30194_c0_g1_i5.path1	Pepsico2_Contig14140.path1	TRINITY_DN20691_c0_g2_i1.path2
TRINITY_DN15750_c1_g1_i1.path1	TRINITY_DN19043_c0_g1_i1.path1	TRINITY_DN11076_c0_g1_i1.path2	TRINITY_DN3070_c1_g1_i2.path1		TRINITY_DN8914_c0_g2_i4.path2	Pepsico2_Contig7514.path1	TRINITY_DN21357_c0_g1_i1.path1	TRINITY_DN55872_c0_g1_i1.path1
novel.1990	Pepsico1_Contig3093.path1	novel.2511	TRINITY_DN1695_c0_g2_i7.path2		TRINITY_DN40802_c0_g2_i2.path1	Pepsico2_Contig5143.path1	Pepsico2_Contig4681.path1	novel.4821
TRINITY_DN158_c0_g1_i1.path1	TRINITY_DN37834_c0_g4_i1.path1	TRINITY_DN8445_c0_g1_i4.path1	TRINITY_DN73578_c0_g1_i1.path1		Pepsico2_Contig8810.path1	Pepsico1_Contig6031.path2	novel.4572	TRINITY_DN20691_c0_g1_i1.path2
novel.7557	TRINITY_DN78422_c0_g1_i2.path1	TRINITY_DN11282_c2_g1_i1.path1	TRINITY_DN108802_c0_g1_i1.path1		TRINITY_DN36154_c1_g1_i1.path1	TRINITY_DN9750_c0_g1_i6.path1	novel.7887	TRINITY_DN17959_c1_g1_i1.path1
novel.2234	TRINITY_DN62134_c5_g1_i1.path1	novel.23	Pepsico2_Contig4567.path1		Pepsico2_Contig16922.path1	TRINITY_DN71899_c0_g1_i2.path1	TRINITY_DN13350_c0_g1_i1.path1	TRINITY_DN11150_c1_g2_i1.path1
TRINITY_DN35060_c1_g1_i1.path1	Pepsico2_Contig4927.path1	TRINITY_DN4504_c1_g2_i1.path1	TRINITY_DN15272_c1_g1_i1.path2		Pepsico1_Contig2899.path2	novel.2564	Pepsico2_Contig5226.path1	TRINITY_DN9120_c1_g1_i2.path1
TRINITY_DN82075_c0_g1_i1.path1	Pepsico1_Contig32793.path1	novel.742	TRINITY_DN16801_c1_g3_i1.path1		Pepsico1_Contig6100.path1	TRINITY_DN15598_c0_g1_i4.path4	Pepsico2_Contig12692.path4	TRINITY_DN13963_c0_g1_i1.path1
novel.2193	novel.8998	Pepsico2_Contig12802.path1	Pepsico1_Contig33380.path1		Pepsico2_Contig3516.path1	Pepsico2_Contig8201.path1	TRINITY_DN54354_c0_g2_i1.path1	TRINITY_DN38268_c0_g1_i1.path1
novel.6249	Pepsico2_Contig11667.path1	TRINITY_DN47812_c0_g1_i2.path1	TRINITY_DN59511_c0_g1_i1.path1		TRINITY_DN14414_c0_g2_i1.path1	Pepsico2_Contig16922.path1	TRINITY_DN72271_c0_g1_i1.path1	TRINITY_DN15885_c0_g1_i1.path2
TRINITY_DN9377_c0_g1_i1.path1	novel.4360	novel.9464	TRINITY_DN39623_c0_g1_i1.path1		Pepsico2_Contig3750.path2	TRINITY_DN34245_c0_g1_i1.path1	TRINITY_DN5857_c0_g1_i1.path1	TRINITY_DN8929_c0_g1_i2.path1
Pepsico2_Contig17649.path1	Pepsico2_Contig12308.path2	novel.8154	Pepsico1_Contig6523.path1		TRINITY_DN97554_c0_g1_i1.path1	TRINITY_DN8174_c0_g1_i4.path1	TRINITY_DN6189_c0_g2_i2.path1	novel.3971
Pepsico1_Contig7004.path1	TRINITY_DN103453_c0_g1_i1.path1	novel.503	novel.4236		Pepsico2_Contig13792.path1	Pepsico2_Contig7827.path1	Pepsico2_Contig7222.path1	TRINITY_DN6633_c0_g1_i5.path2
TRINITY_DN44082_c0_g1_i1.path1	TRINITY_DN3070_c1_g1_i2.path1	Pepsico1_Contig5077.path1	Pepsico2_Contig12692.path4		TRINITY_DN31633_c1_g1_i4.path1	novel.6018	TRINITY_DN11600_c0_g1_i1.path1	TRINITY_DN15272_c1_g1_i1.path2
TRINITY_DN12104_c0_g1_i1.path3	Pepsico2_Contig3832.path2	novel.8351	TRINITY_DN15695_c0_g1_i3.path1		TRINITY_DN4139_c0_g1_i1.path1	TRINITY_DN90580_c0_g1_i1.path2	novel.42	Pepsico2_Contig3010.path1
novel.3595	novel.4164	TRINITY_DN25442_c0_g1_i1.path1	TRINITY_DN18480_c0_g1_i4.path1		TRINITY_DN26399_c0_g1_i2.path1	novel.587	Pepsico2_Contig11065.path1	TRINITY_DN8445_c0_g2_i1.path1
TRINITY_DN8043_c0_g1_i2.path1	TRINITY_DN78849_c0_g1_i1.path1	novel.5600	novel.6786		novel.1863	novel.3381	novel.662	TRINITY_DN78750_c0_g1_i1.path1
TRINITY_DN6150_c0_g1_i3.path1	novel.8154	TRINITY_DN9519_c0_g1_i4.path1	TRINITY_DN2210_c0_g2_i3.path1		TRINITY_DN12913_c0_g1_i2.path1	TRINITY_DN1599_c1_g1_i3.path1	novel.2556	TRINITY_DN32319_c0_g1_i1.path1
TRINITY_DN20672_c0_g1_i1.path3	Pepsico1_Contig2800.path1	TRINITY_DN7209_c0_g1_i10.path1	Pepsico1_Contig36864.path1		Pepsico2_Contig2358.path1	TRINITY_DN25572_c0_g1_i1.path2	Pepsico1_Contig1514.path1	Pepsico2_Contig8620.path1
TRINITY_DN69354_c0_g1_i1.path1	TRINITY_DN52025_c0_g1_i2.path1	Pepsico2_Contig7348.path1	TRINITY_DN22897_c0_g1_i1.path2		TRINITY_DN13364_c0_g1_i3.path1	TRINITY_DN50814_c0_g1_i6.path2	TRINITY_DN18638_c0_g3_i1.path1	novel.2510
Pepsico2_Contig3522.path1	TRINITY_DN5180_c0_g2_i3.path1	TRINITY_DN5056_c0_g1_i2.path1	Pepsico1_Contig4382.path1		TRINITY_DN158_c0_g1_i1.path1	TRINITY_DN10738_c0_g2_i1.path1	novel.1745	TRINITY_DN12947_c0_g1_i4.path1
TRINITY_DN6065_c0_g1_i2.path1	novel.7507	Pepsico1_Contig3658.path1	TRINITY_DN11041_c0_g2_i1.path1		TRINITY_DN19162_c0_g1_i3.path1	TRINITY_DN1019_c0_g2_i1.path1	novel.3628	TRINITY_DN30131_c0_g1_i2.path1
TRINITY_DN20762_c0_g1_i1.path1	TRINITY_DN18489_c1_g1_i1.path1	TRINITY_DN26184_c0_g1_i2.path1	TRINITY_DN35314_c0_g1_i3.path1		TRINITY_DN13315_c0_g1_i3.path1	Pepsico2_Contig17522.path1	Pepsico2_Contig7954.path1	TRINITY_DN693_c1_g1_i1.path1
TRINITY_DN14775_c0_g1_i8.path1	novel.9659	TRINITY_DN13830_c1_g1_i1.path1	novel.2274		TRINITY_DN51761_c3_g2_i3.path1	TRINITY_DN16015_c0_g2_i7.path1	Pepsico2_Contig14438.path1	TRINITY_DN108478_c0_g1_i1.path4
Pepsico2_Contig4927.path2	novel.50	TRINITY_DN11768_c0_g1_i1.path1	novel.6941		TRINITY_DN57958_c0_g1_i1.path1	Pepsico2_Contig5026.path1	novel.2117	Pepsico2_Contig14438.path1
novel.9948	Pepsico2_Contig17730.path1	TRINITY_DN6942_c0_g1_i2.path1	novel.8191		Pepsico1_Contig39106.path1	TRINITY_DN46359_c0_g1_i2.path1	novel.7569	Pepsico2_Contig18065.path1
Pepsico2_Contig13304.path1	Pepsico2_Contig4456.path2	novel.1353	Pepsico1_Contig4097.path1		TRINITY_DN1006_c0_g1_i7.path1	TRINITY_DN18168_c0_g1_i2.path1	TRINITY_DN27095_c0_g1_i1.path1	TRINITY_DN13072_c1_g1_i2.path1
TRINITY_DN15088_c0_g1_i1.path1	TRINITY_DN14174_c0_g3_i1.path1	TRINITY_DN9569_c0_g1_i3.path3	novel.1956		Pepsico1_Contig3446.path2	Pepsico2_Contig14622.path2	TRINITY_DN90920_c0_g1_i1.path1	novel.2676
TRINITY_DN5942_c1_g1_i4.path2	Pepsico2_Contig12502.path1	TRINITY_DN19732_c1_g1_i2.path2	TRINITY_DN475_c0_g1_i14.path1		TRINITY_DN15867_c0_g1_i5.path1	TRINITY_DN92919_c0_g1_i1.path1	TRINITY_DN29788_c0_g1_i1.path1	Pepsico2_Contig19818.path1
TRINITY_DN106898_c0_g1_i1.path1	novel.101	TRINITY_DN5970_c2_g1_i1.path1	novel.3547		Pepsico2_Contig20237.path1	TRINITY_DN90811_c0_g1_i1.path1	TRINITY_DN4484_c1_g1_i2.path1	novel.9360
novel.658	TRINITY_DN3153_c0_g3_i2.path1	TRINITY_DN20518_c0_g1_i1.path1	TRINITY_DN10782_c0_g1_i1.path1		Pepsico2_Contig17169.path1	TRINITY_DN25287_c0_g3_i1.path1	novel.9200	novel.8779
TRINITY_DN11760_c0_g1_i2.path1	TRINITY_DN19182_c0_g1_i2.path2	TRINITY_DN28511_c0_g1_i5.path1	TRINITY_DN15788_c0_g1_i1.path1		TRINITY_DN78505_c0_g1_i1.path1	novel.751	TRINITY_DN7311_c0_g1_i1.path1	novel.2516
Pepsico2_Contig19452.path1	TRINITY_DN2809_c0_g1_i14.path1	novel.6249	Pepsico2_Contig9165.path2		TRINITY_DN6116_c0_g2_i2.path1	TRINITY_DN18616_c0_g1_i4.path1	TRINITY_DN34221_c0_g1_i1.path2	Pepsico1_Contig6958.path2
Pepsico1_Contig28646.path1	TRINITY_DN41330_c0_g1_i2.path2	TRINITY_DN1459_c0_g2_i3.path1	novel.335		TRINITY_DN91067_c0_g1_i1.path2	TRINITY_DN79353_c0_g1_i1.path1	Pepsico2_Contig6525.path1	Pepsico2_Contig6611.path5
novel.5248	TRINITY_DN245_c0_g2_i1.path1	TRINITY_DN30113_c0_g1_i1.path1	Pepsico2_Contig19854.path1		TRINITY_DN24018_c0_g1_i7.path1	Pepsico2_Contig14670.path2	Pepsico2_Contig748.path1	Pepsico2_Contig13792.path1
TRINITY_DN68934_c0_g1_i1.path1	TRINITY_DN4204_c0_g1_i1.path1	TRINITY_DN68790_c0_g1_i1.path1	novel.877		TRINITY_DN33948_c0_g1_i1.path1	TRINITY_DN16015_c0_g1_i1.path1	TRINITY_DN14497_c0_g1_i2.path1	TRINITY_DN11593_c1_g2_i1.path1
Pepsico2_Contig7727.path1	TRINITY_DN13254_c1_g1_i1.path1	TRINITY_DN12758_c2_g2_i1.path1	Pepsico2_Contig1781.path1		TRINITY_DN30187_c0_g1_i1.path1	Pepsico2_Contig4880.path1	TRINITY_DN15559_c0_g2_i2.path2	novel.8182
Pepsico2_Contig9464.path1	TRINITY_DN10241_c1_g3_i1.path1	novel.7498	TRINITY_DN10152_c0_g1_i7.path1		TRINITY_DN22019_c0_g1_i3.path1	novel.2138	TRINITY_DN97533_c0_g1_i1.path1	novel.8487
novel.2466	TRINITY_DN249_c0_g3_i1.path1	TRINITY_DN27140_c0_g1_i1.path1	TRINITY_DN7653_c0_g2_i2.path1		Pepsico2_Contig17815.path1	novel.7150	Pepsico2_Contig11017.path2	TRINITY_DN16801_c1_g3_i1.path1
TRINITY_DN21752_c0_g1_i2.path2	Pepsico1_Contig4766.path1	TRINITY_DN14212_c0_g1_i1.path1	novel.5932		Pepsico2_Contig10642.path2	TRINITY_DN43686_c0_g1_i1.path1	TRINITY_DN10806_c1_g2_i8.path2	TRINITY_DN16589_c0_g3_i3.path1
TRINITY_DN30653_c0_g1_i1.path1	TRINITY_DN1583_c0_g1_i1.path1	novel.10217	TRINITY_DN24347_c0_g1_i2.path1		TRINITY_DN68988_c0_g1_i1.path2	novel.4819	novel.9025	novel.8506
TRINITY_DN87669_c0_g1_i1.path1	TRINITY_DN29271_c0_g1_i2.path1	TRINITY_DN2210_c0_g2_i3.path1	TRINITY_DN47813_c0_g1_i1.path1		TRINITY_DN16818_c0_g3_i1.path1	TRINITY_DN12548_c0_g1_i3.path1	Pepsico2_Contig19596.path1	TRINITY_DN33707_c0_g1_i5.path1
TRINITY_DN19239_c0_g1_i1.path1	TRINITY_DN8939_c0_g1_i1.path1	novel.5929	TRINITY_DN25461_c0_g1_i1.path2		novel.8052	Pepsico2_Contig6846.path2	novel.9649	TRINITY_DN5076_c0_g1_i5.path1
novel.751	TRINITY_DN582_c2_g1_i6.path1	TRINITY_DN10815_c0_g1_i1.path1	novel.7052		Pepsico2_Contig4435.path1	TRINITY_DN1580_c0_g1_i4.path2	Pepsico2_Contig19525.path2	TRINITY_DN24825_c0_g4_i2.path1
novel.9602	TRINITY_DN36978_c0_g1_i1.path1	Pepsico2_Contig17550.path2	TRINITY_DN628_c0_g2_i3.path1		TRINITY_DN37816_c0_g1_i1.path1	Pepsico2_Contig18850.path1	novel.7557	Pepsico2_Contig6405.path1
novel.6325	TRINITY_DN4502_c0_g2_i1.path1	TRINITY_DN57700_c0_g1_i1.path1	Pepsico2_Contig12177.path2		novel.3012	Pepsico2_Contig19649.path2	Pepsico1_Contig1024.path1	TRINITY_DN18292_c0_g3_i1.path1
TRINITY_DN13035_c0_g1_i13.path1	novel.1731	TRINITY_DN17301_c0_g1_i1.path1	TRINITY_DN20545_c0_g2_i1.path1		novel.587	TRINITY_DN2208_c0_g1_i8.path1	TRINITY_DN87_c0_g1_i1.path2	TRINITY_DN1201_c2_g1_i2.path1
novel.1159	Pepsico1_Contig5048.path1	novel.9616	novel.4538		TRINITY_DN6846_c0_g2_i1.path1	Pepsico1_Contig2324.path2	TRINITY_DN10166_c0_g1_i1.path1	TRINITY_DN16522_c0_g1_i3.path2
TRINITY_DN276_c1_g1_i1.path1	Pepsico1_Contig7855.path1	Pepsico2_Contig11149.path1	Pepsico1_Contig1795.path1		Pepsico2_Contig884.path1	Pepsico2_Contig752.path1	TRINITY_DN55197_c0_g1_i1.path1	TRINITY_DN90920_c0_g1_i1.path1
Pepsico2_Contig14347.path1	TRINITY_DN106452_c0_g1_i1.path1	TRINITY_DN21916_c0_g1_i1.path1	TRINITY_DN28048_c0_g1_i1.path2		TRINITY_DN37157_c0_g1_i1.path1	Pepsico2_Contig13906.path2	novel.6646	TRINITY_DN933_c0_g1_i4.path1
TRINITY_DN12193_c0_g2_i1.path2	TRINITY_DN582_c2_g1_i6.path2	Pepsico2_Contig15323.path1	TRINITY_DN44023_c0_g1_i4.path1		TRINITY_DN16543_c0_g1_i1.path2	TRINITY_DN32319_c0_g1_i1.path1	novel.2683	TRINITY_DN34195_c0_g1_i2.path2
TRINITY_DN16433_c1_g1_i1.path1	TRINITY_DN35789_c0_g1_i1.path2	TRINITY_DN33307_c0_g1_i2.path1	TRINITY_DN28946_c0_g1_i2.path1		TRINITY_DN7824_c0_g1_i1.path2	TRINITY_DN571_c0_g1_i1.path1	TRINITY_DN21996_c0_g1_i1.path1	Pepsico2_Contig6534.path1
TRINITY_DN27463_c0_g1_i1.path1	novel.8808	novel.1275	Pepsico2_Contig16821.path1		novel.2018	Pepsico1_Contig2161.path2	TRINITY_DN26408_c0_g1_i1.path1	TRINITY_DN26281_c0_g2_i1.path1
TRINITY_DN52160_c0_g1_i1.path1	Pepsico2_Contig20155.path1	Pepsico1_Contig37214.path1	TRINITY_DN106836_c0_g1_i1.path1		TRINITY_DN53024_c0_g1_i1.path1	TRINITY_DN99572_c0_g1_i1.path1	Pepsico2_Contig2152.path1	TRINITY_DN26262_c0_g1_i1.path1
novel.4048	novel.2937	TRINITY_DN8939_c0_g1_i1.path1	TRINITY_DN44824_c0_g1_i1.path5		TRINITY_DN41325_c1_g1_i1.path1	Pepsico2_Contig7603.path2	TRINITY_DN109564_c0_g1_i1.path1	novel.4694
TRINITY_DN35_c0_g2_i1.path1	novel.3971	TRINITY_DN9291_c0_g1_i1.path1	TRINITY_DN18185_c0_g1_i6.path1		Pepsico2_Contig8726.path1	TRINITY_DN16818_c0_g3_i1.path1	TRINITY_DN11920_c1_g2_i1.path1	novel.1785
TRINITY_DN9439_c0_g2_i5.path1	TRINITY_DN5135_c0_g2_i1.path1	TRINITY_DN19377_c0_g1_i3.path1	TRINITY_DN19086_c0_g1_i2.path1		TRINITY_DN31204_c0_g2_i1.path2	TRINITY_DN22092_c0_g1_i2.path1	Pepsico2_Contig6534.path1	Pepsico1_Contig32727.path1
Pepsico2_Contig4417.path1	TRINITY_DN15645_c1_g1_i8.path1	TRINITY_DN22584_c1_g1_i1.path1	TRINITY_DN11478_c0_g1_i4.path2		TRINITY_DN72019_c0_g1_i1.path1	TRINITY_DN4444_c0_g1_i1.path1	TRINITY_DN2414_c1_g1_i3.path1	TRINITY_DN2567_c0_g1_i1.path3
TRINITY_DN17687_c0_g2_i2.path1	TRINITY_DN1779_c0_g1_i10.path1	TRINITY_DN19900_c0_g2_i1.path1	novel.7701		TRINITY_DN31076_c0_g1_i4.path2	novel.2412	novel.661	TRINITY_DN95487_c0_g1_i1.path1
Pepsico2_Contig9996.path1	TRINITY_DN25998_c0_g1_i2.path2	Pepsico2_Contig3495.path1	Pepsico2_Contig8389.path1		TRINITY_DN15105_c0_g1_i6.path1	Pepsico2_Contig12291.path1	TRINITY_DN5056_c0_g1_i2.path1	Pepsico1_Contig1106.path1
TRINITY_DN553_c0_g3_i1.path1	Pepsico2_Contig17550.path2	Pepsico1_Contig814.path2	novel.9793		TRINITY_DN103531_c0_g1_i1.path1	TRINITY_DN97221_c0_g1_i1.path1	novel.3381	Pepsico2_Contig752.path1
TRINITY_DN1619_c0_g1_i3.path1	novel.1498	TRINITY_DN6995_c1_g2_i1.path2	TRINITY_DN27140_c0_g1_i1.path1		Pepsico2_Contig4663.path1	Pepsico2_Contig4658.path1	novel.415	Pepsico2_Contig9173.path1
TRINITY_DN99570_c0_g1_i1.path1	TRINITY_DN58767_c0_g1_i1.path1	TRINITY_DN2809_c0_g1_i14.path1	TRINITY_DN13254_c1_g1_i1.path1		TRINITY_DN7145_c0_g1_i6.path1	TRINITY_DN2414_c0_g2_i1.path1	Pepsico2_Contig4732.path1	Pepsico1_Contig6629.path1
Pepsico1_Contig5739.path1	TRINITY_DN32533_c0_g1_i1.path2	novel.2677	Pepsico2_Contig20350.path1		TRINITY_DN3106_c0_g2_i1.path1	TRINITY_DN87482_c0_g1_i1.path1	TRINITY_DN32638_c0_g1_i1.path1	novel.1098
novel.5614	TRINITY_DN12642_c0_g1_i9.path1	TRINITY_DN14014_c1_g1_i1.path1	TRINITY_DN18226_c0_g1_i1.path1		TRINITY_DN21329_c0_g1_i1.path1	Pepsico1_Contig3093.path2	novel.2707	TRINITY_DN10612_c0_g1_i14.path1
TRINITY_DN3489_c0_g1_i2.path1	TRINITY_DN25442_c0_g1_i1.path1	TRINITY_DN4879_c0_g2_i1.path1	novel.503		novel.6250	novel.9761	TRINITY_DN429_c0_g1_i1.path1	TRINITY_DN11167_c2_g1_i1.path1
Pepsico2_Contig5887.path1	Pepsico2_Contig17684.path1	Pepsico1_Contig32727.path1	TRINITY_DN25014_c0_g1_i3.path1		Pepsico2_Contig503.path1	TRINITY_DN743_c0_g1_i3.path2	TRINITY_DN37508_c0_g1_i2.path1	TRINITY_DN6995_c1_g2_i1.path2
novel.6523	Pepsico1_Contig1783.path1	TRINITY_DN15695_c0_g1_i3.path1	TRINITY_DN10815_c0_g1_i1.path1		TRINITY_DN9047_c2_g3_i1.path1	TRINITY_DN12836_c0_g1_i3.path1	TRINITY_DN10981_c1_g1_i2.path1	TRINITY_DN49172_c0_g1_i1.path1
novel.1427	Pepsico2_Contig301.path1	TRINITY_DN65056_c0_g1_i1.path1	novel.9574		Pepsico2_Contig14542.path1	TRINITY_DN10097_c0_g1_i2.path1	Pepsico2_Contig8201.path1	Pepsico1_Contig4097.path1
TRINITY_DN693_c1_g1_i1.path1	novel.9330	TRINITY_DN11593_c3_g1_i1.path1	TRINITY_DN72337_c0_g1_i1.path1		TRINITY_DN6533_c1_g3_i1.path2	novel.9609	novel.7309	TRINITY_DN15559_c0_g2_i2.path2
novel.9312	Pepsico1_Contig3658.path1	TRINITY_DN9426_c0_g1_i3.path1	TRINITY_DN35335_c0_g4_i2.path1		Pepsico2_Contig4818.path1	TRINITY_DN103453_c0_g1_i1.path1	novel.6722	novel.3837
TRINITY_DN40440_c0_g2_i1.path1	TRINITY_DN4027_c0_g5_i1.path2	TRINITY_DN7190_c0_g3_i1.path1	TRINITY_DN3161_c0_g1_i1.path1		TRINITY_DN22560_c0_g1_i4.path1	novel.3010	TRINITY_DN37342_c0_g2_i1.path1	novel.6363
novel.2160	Pepsico2_Contig17253.path1	Pepsico1_Contig196.path1	TRINITY_DN1834_c0_g1_i6.path3		TRINITY_DN14700_c0_g1_i2.path1	Pepsico2_Contig3519.path1	TRINITY_DN39335_c0_g1_i1.path1	TRINITY_DN11307_c0_g2_i1.path1
Pepsico2_Contig17253.path1	TRINITY_DN107882_c0_g1_i1.path1	Pepsico2_Contig1781.path1	TRINITY_DN1019_c0_g2_i1.path2		TRINITY_DN45694_c0_g1_i2.path1	novel.3837	TRINITY_DN24825_c0_g4_i2.path1	TRINITY_DN2_c0_g1_i2.path2
TRINITY_DN21421_c0_g1_i1.path2	TRINITY_DN11349_c0_g1_i2.path1	TRINITY_DN9890_c0_g1_i6.path2	novel.8548		TRINITY_DN70133_c0_g1_i1.path1	TRINITY_DN108401_c0_g1_i1.path1	novel.9659	TRINITY_DN10826_c0_g1_i2.path1
TRINITY_DN618_c0_g1_i2.path1	novel.2969	TRINITY_DN32113_c0_g1_i1.path1	Pepsico1_Contig36864.path2		Pepsico2_Contig17023.path1	TRINITY_DN21996_c0_g1_i1.path1	novel.5379	TRINITY_DN29788_c0_g1_i1.path1
Pepsico1_Contig3863.path1	TRINITY_DN37583_c0_g1_i1.path1	TRINITY_DN3853_c0_g1_i1.path1	novel.4727		TRINITY_DN1295_c1_g1_i1.path1	TRINITY_DN14607_c0_g1_i1.path1	TRINITY_DN6929_c1_g1_i4.path1	Pepsico2_Contig3315.path1
TRINITY_DN28712_c0_g1_i1.path1	TRINITY_DN112740_c0_g1_i1.path2	TRINITY_DN10932_c1_g1_i1.path1	novel.6580		TRINITY_DN91140_c0_g1_i1.path1	TRINITY_DN3623_c1_g1_i3.path1	novel.8144	TRINITY_DN10815_c0_g2_i1.path1
Pepsico1_Contig4766.path1	Pepsico1_Contig22394.path1	TRINITY_DN10443_c0_g1_i1.path2	Pepsico1_Contig7763.path1		novel.9159	TRINITY_DN3104_c1_g2_i1.path1	TRINITY_DN1779_c0_g1_i10.path1	Pepsico2_Contig2718.path1
TRINITY_DN40531_c0_g2_i1.path1	TRINITY_DN25461_c0_g1_i1.path2	novel.5121	novel.10561		Pepsico2_Contig781.path1	Pepsico1_Contig2161.path1	Pepsico2_Contig6463.path1	TRINITY_DN30653_c0_g1_i1.path1
TRINITY_DN40004_c0_g1_i2.path1	TRINITY_DN3174_c1_g1_i2.path1	TRINITY_DN11150_c1_g2_i1.path1	TRINITY_DN24943_c0_g1_i1.path1		TRINITY_DN2098_c1_g1_i5.path1	Pepsico2_Contig20597.path2	novel.2734	novel.10237
TRINITY_DN5355_c1_g1_i3.path1	TRINITY_DN17829_c0_g1_i1.path2	TRINITY_DN35543_c0_g1_i4.path1	TRINITY_DN34621_c0_g1_i1.path2		novel.5420	Pepsico2_Contig9173.path1	Pepsico2_Contig6015.path1	TRINITY_DN4606_c0_g2_i1.path1
Pepsico2_Contig19999.path1	novel.8861	TRINITY_DN24125_c0_g1_i1.path1	TRINITY_DN15198_c0_g2_i2.path2		Pepsico2_Contig16947.path2	TRINITY_DN16257_c1_g1_i5.path1	Pepsico2_Contig1718.path1	TRINITY_DN966_c0_g2_i3.path1
novel.3359	TRINITY_DN877_c0_g1_i2.path1	novel.4935	Pepsico1_Contig34820.path1		novel.4843	TRINITY_DN18326_c0_g1_i2.path1	novel.7047	TRINITY_DN20691_c0_g1_i1.path1
novel.4697	TRINITY_DN19953_c0_g1_i3.path1	Pepsico1_Contig2677.path1	Pepsico1_Contig892.path1		Pepsico2_Contig3465.path1	TRINITY_DN13315_c0_g1_i3.path1	Pepsico2_Contig12882.path1	TRINITY_DN50091_c1_g1_i1.path1
Pepsico2_Contig404.path1	TRINITY_DN29095_c0_g2_i1.path1	novel.2380	Pepsico2_Contig14315.path1		TRINITY_DN7075_c0_g1_i5.path1	TRINITY_DN2377_c0_g1_i1.path2	novel.560	TRINITY_DN13776_c0_g1_i3.path1
Pepsico2_Contig12716.path1	TRINITY_DN12913_c0_g1_i2.path1	Pepsico2_Contig1496.path1	novel.5704		TRINITY_DN109183_c0_g1_i1.path1	TRINITY_DN63001_c0_g1_i1.path1	novel.9574	novel.2368
novel.3888	TRINITY_DN11349_c0_g1_i2.path2	TRINITY_DN90490_c0_g1_i1.path1	TRINITY_DN108824_c0_g1_i1.path1		TRINITY_DN52160_c0_g1_i1.path1	novel.1363	TRINITY_DN9209_c0_g1_i7.path1	novel.3955
novel.2003	TRINITY_DN14314_c1_g1_i2.path1	TRINITY_DN771_c0_g1_i2.path1	Pepsico2_Contig498.path1		TRINITY_DN16904_c3_g1_i1.path1	Pepsico2_Contig3516.path1	Pepsico2_Contig20487.path1	novel.3116
TRINITY_DN1917_c0_g1_i1.path2	TRINITY_DN39737_c0_g1_i1.path1	TRINITY_DN25384_c0_g1_i1.path2	TRINITY_DN7061_c0_g1_i3.path1		TRINITY_DN35640_c0_g4_i1.path1	Pepsico2_Contig779.path1	TRINITY_DN14314_c0_g2_i2.path1	TRINITY_DN571_c0_g2_i1.path1
TRINITY_DN13200_c0_g1_i1.path2	TRINITY_DN72452_c0_g1_i1.path1	TRINITY_DN4595_c0_g3_i1.path1	TRINITY_DN12758_c2_g2_i1.path1		Pepsico2_Contig18357.path1	TRINITY_DN16257_c1_g1_i5.path2	TRINITY_DN9225_c0_g1_i1.path1	Pepsico2_Contig7935.path1
TRINITY_DN28089_c0_g1_i1.path1	novel.1598	Pepsico2_Contig17058.path1	Pepsico1_Contig4010.path1		Pepsico1_Contig1860.path1	TRINITY_DN16362_c0_g1_i1.path1	Pepsico2_Contig10427.path1	Pepsico2_Contig6839.path1
novel.1185	novel.8191	TRINITY_DN15455_c0_g1_i7.path2	TRINITY_DN15065_c0_g2_i1.path1		Pepsico2_Contig5219.path1	TRINITY_DN18095_c0_g1_i1.path1	TRINITY_DN56274_c0_g1_i1.path1	Pepsico2_Contig17986.path1
TRINITY_DN3174_c1_g1_i2.path1	TRINITY_DN102365_c0_g1_i1.path1	novel.1031	TRINITY_DN20757_c0_g1_i1.path1		TRINITY_DN13237_c0_g1_i10.path1	TRINITY_DN9169_c0_g1_i1.path2	Pepsico1_Contig37105.path1	Pepsico2_Contig19649.path3
TRINITY_DN7236_c0_g1_i9.path2	Pepsico2_Contig13004.path1	novel.1301	novel.2343		TRINITY_DN34430_c0_g2_i1.path1	TRINITY_DN38367_c0_g1_i1.path1	TRINITY_DN15695_c0_g1_i3.path1	Pepsico2_Contig8092.path1
TRINITY_DN14617_c0_g3_i1.path1	TRINITY_DN2354_c0_g1_i4.path2	novel.9736	novel.9022		TRINITY_DN85858_c0_g1_i1.path1	Pepsico1_Contig5249.path1	Pepsico2_Contig8195.path1	TRINITY_DN59339_c0_g1_i2.path1
TRINITY_DN40548_c0_g1_i1.path1	Pepsico2_Contig15246.path1	TRINITY_DN43546_c0_g2_i1.path1	Pepsico2_Contig16982.path2		novel.3344	Pepsico1_Contig97.path1	TRINITY_DN8001_c0_g1_i3.path1	novel.3405
novel.4320	TRINITY_DN18185_c0_g1_i6.path1	Pepsico2_Contig8757.path1	TRINITY_DN9637_c0_g1_i4.path1		TRINITY_DN92912_c0_g1_i1.path1	Pepsico2_Contig10618.path1	TRINITY_DN21752_c0_g1_i2.path2	TRINITY_DN18168_c0_g1_i2.path1
Pepsico1_Contig5709.path1	Pepsico2_Contig8026.path1	novel.3680	TRINITY_DN17545_c0_g1_i1.path1		Pepsico1_Contig47.path2	TRINITY_DN36132_c0_g1_i1.path1	TRINITY_DN14014_c0_g3_i1.path1	TRINITY_DN33361_c0_g1_i5.path2
TRINITY_DN45040_c0_g2_i1.path2	novel.4532	TRINITY_DN11195_c1_g1_i1.path2	Pepsico2_Contig638.path1		TRINITY_DN53627_c0_g2_i2.path1	Pepsico2_Contig2618.path1	Pepsico2_Contig3516.path1	novel.1427
TRINITY_DN6098_c0_g1_i2.path1	TRINITY_DN13964_c0_g2_i1.path1	TRINITY_DN16063_c0_g1_i1.path1	TRINITY_DN2098_c0_g2_i1.path1		TRINITY_DN66260_c0_g1_i1.path1	TRINITY_DN98409_c0_g1_i1.path1	Pepsico2_Contig752.path1	Pepsico2_Contig17305.path4
Pepsico2_Contig16939.path1	TRINITY_DN30113_c0_g1_i1.path1	Pepsico1_Contig3010.path1	TRINITY_DN1803_c3_g1_i1.path1		TRINITY_DN9669_c0_g1_i1.path1	Pepsico2_Contig20063.path1	Pepsico2_Contig9040.path1	TRINITY_DN10907_c0_g2_i2.path1
Pepsico2_Contig18146.path1	Pepsico2_Contig19690.path1	novel.3971	TRINITY_DN104093_c0_g1_i1.path2		TRINITY_DN14268_c0_g1_i3.path1	novel.9345	TRINITY_DN10620_c0_g2_i1.path1	TRINITY_DN6929_c1_g1_i4.path1
Pepsico1_Contig7855.path1	TRINITY_DN4474_c1_g2_i1.path1	TRINITY_DN9659_c0_g2_i1.path2	TRINITY_DN40521_c0_g1_i2.path1		TRINITY_DN103518_c0_g1_i1.path1	TRINITY_DN56621_c0_g2_i1.path1	TRINITY_DN8652_c0_g1_i6.path1	TRINITY_DN65056_c0_g1_i1.path1
TRINITY_DN94912_c0_g1_i1.path1	TRINITY_DN43549_c0_g1_i1.path2	Pepsico2_Contig6346.path1	TRINITY_DN36993_c0_g1_i1.path1		novel.3684	novel.6924	novel.6924	Pepsico2_Contig16657.path3
Pepsico2_Contig19649.path2	TRINITY_DN16063_c0_g1_i1.path1	TRINITY_DN18226_c0_g1_i1.path1	TRINITY_DN4640_c0_g2_i1.path2		TRINITY_DN58721_c0_g1_i1.path2	Pepsico2_Contig13244.path1	Pepsico1_Contig886.path1	TRINITY_DN99485_c0_g1_i1.path1
Pepsico2_Contig20061.path1	Pepsico2_Contig16783.path1	TRINITY_DN397_c0_g2_i1.path1	Pepsico2_Contig20155.path1		TRINITY_DN15625_c0_g1_i3.path1	novel.3116	Pepsico2_Contig19613.path1	TRINITY_DN17775_c0_g2_i1.path1
TRINITY_DN48958_c0_g1_i2.path1	TRINITY_DN15870_c0_g1_i3.path1	novel.2466	TRINITY_DN19368_c0_g1_i7.path1		TRINITY_DN62263_c0_g1_i1.path1	novel.9940	TRINITY_DN18366_c0_g1_i1.path2	TRINITY_DN11586_c0_g2_i3.path1
TRINITY_DN2098_c1_g1_i5.path1	TRINITY_DN70178_c0_g1_i1.path1	novel.2226	TRINITY_DN19732_c1_g1_i2.path1		Pepsico2_Contig3071.path2	TRINITY_DN21706_c0_g1_i3.path1	novel.121	Pepsico2_Contig19854.path2
TRINITY_DN10620_c0_g1_i4.path1	TRINITY_DN93619_c0_g1_i1.path1	TRINITY_DN11063_c0_g1_i1.path1	Pepsico1_Contig672.path2		TRINITY_DN9204_c0_g2_i4.path1	TRINITY_DN100308_c0_g1_i1.path1	TRINITY_DN4132_c1_g1_i1.path1	Pepsico2_Contig7794.path1
TRINITY_DN13237_c0_g1_i10.path1	TRINITY_DN38578_c0_g4_i1.path1	novel.9497	TRINITY_DN18747_c0_g1_i10.path1		TRINITY_DN3567_c0_g2_i2.path1	TRINITY_DN48060_c0_g1_i1.path1	TRINITY_DN29095_c0_g2_i1.path1	TRINITY_DN25287_c0_g3_i1.path1
novel.2332	TRINITY_DN18958_c0_g1_i3.path1	Pepsico2_Contig18065.path1	Pepsico1_Contig1252.path1		TRINITY_DN13035_c0_g1_i13.path1	Pepsico1_Contig1503.path1	TRINITY_DN72382_c0_g1_i1.path1	novel.335
novel.585	novel.2742	TRINITY_DN18228_c0_g1_i4.path1	novel.8552		novel.3859	novel.2556	Pepsico1_Contig6573.path1	TRINITY_DN6909_c0_g1_i6.path2
novel.9737	TRINITY_DN31069_c0_g1_i1.path3	TRINITY_DN20762_c0_g1_i1.path1	novel.8660		TRINITY_DN92395_c0_g1_i1.path1	novel.4804	Pepsico1_Contig521.path1	TRINITY_DN89953_c0_g1_i1.path1
TRINITY_DN88275_c0_g1_i1.path1	novel.23	TRINITY_DN8794_c0_g2_i3.path1	TRINITY_DN6989_c0_g1_i1.path1		novel.9496	novel.263	TRINITY_DN3070_c1_g1_i2.path1	novel.6846
TRINITY_DN7698_c0_g1_i1.path1	TRINITY_DN6488_c0_g1_i1.path3	TRINITY_DN21686_c1_g1_i1.path1	TRINITY_DN96412_c0_g1_i1.path1		TRINITY_DN13880_c0_g1_i5.path1	Pepsico2_Contig12764.path1	TRINITY_DN2365_c0_g1_i15.path1	TRINITY_DN10194_c0_g1_i1.path1
TRINITY_DN12639_c0_g1_i6.path1	TRINITY_DN55504_c0_g1_i1.path1	novel.4821	TRINITY_DN8939_c0_g1_i1.path1		TRINITY_DN18448_c0_g1_i2.path2	Pepsico1_Contig2324.path1	TRINITY_DN693_c1_g1_i1.path1	TRINITY_DN18326_c0_g1_i2.path1
TRINITY_DN7236_c0_g1_i9.path1	Pepsico2_Contig6897.path1	TRINITY_DN8445_c0_g2_i1.path1	novel.9929		novel.5605	Pepsico2_Contig1104.path1	TRINITY_DN2377_c0_g1_i1.path1	TRINITY_DN9612_c0_g1_i1.path2
TRINITY_DN923_c1_g1_i1.path2	TRINITY_DN693_c1_g1_i1.path1	TRINITY_DN37516_c0_g1_i1.path1	TRINITY_DN17906_c0_g1_i1.path1		TRINITY_DN28942_c0_g1_i1.path1	novel.4958	TRINITY_DN3212_c0_g1_i1.path1	TRINITY_DN26200_c0_g1_i1.path1
Pepsico2_Contig14974.path1	novel.9823	TRINITY_DN32418_c0_g1_i1.path1	Pepsico1_Contig2398.path2		TRINITY_DN43775_c0_g1_i1.path2	TRINITY_DN72_c1_g1_i2.path1	TRINITY_DN80397_c0_g1_i1.path1	TRINITY_DN8648_c0_g1_i4.path2
TRINITY_DN19368_c0_g1_i7.path1	TRINITY_DN66014_c0_g1_i1.path1	TRINITY_DN2337_c0_g1_i6.path2	TRINITY_DN11345_c0_g1_i3.path1		novel.3010	novel.1031	TRINITY_DN5321_c0_g1_i10.path1	TRINITY_DN22791_c0_g2_i1.path1
TRINITY_DN18211_c0_g3_i1.path1	Pepsico1_Contig7579.path1	Pepsico2_Contig3516.path1	TRINITY_DN103356_c0_g1_i1.path1		TRINITY_DN20764_c0_g3_i1.path1	Pepsico2_Contig648.path1	TRINITY_DN320_c0_g1_i1.path1	TRINITY_DN10873_c0_g2_i1.path1
novel.8682	novel.10304	TRINITY_DN13498_c0_g2_i1.path1	TRINITY_DN22584_c0_g2_i1.path1		Pepsico2_Contig90.path1	novel.1627	TRINITY_DN1623_c1_g1_i8.path2	Pepsico2_Contig19669.path1
Pepsico2_Contig8794.path2	novel.9903	TRINITY_DN14497_c0_g1_i2.path1	TRINITY_DN14383_c0_g2_i2.path1		Pepsico2_Contig7839.path2	TRINITY_DN24307_c0_g1_i1.path1	TRINITY_DN5232_c0_g1_i7.path1	TRINITY_DN53169_c0_g1_i1.path2
TRINITY_DN23107_c0_g1_i5.path2	novel.6297	TRINITY_DN40249_c0_g1_i1.path1	novel.7507		TRINITY_DN72339_c0_g1_i1.path1	novel.1378	Pepsico2_Contig5200.path1	TRINITY_DN31413_c0_g1_i4.path1
TRINITY_DN25139_c0_g1_i1.path1	TRINITY_DN8792_c0_g1_i1.path2	novel.4048	TRINITY_DN18011_c0_g1_i4.path3		TRINITY_DN72271_c0_g1_i1.path1	TRINITY_DN10134_c0_g1_i1.path1	TRINITY_DN5135_c0_g2_i1.path1	TRINITY_DN5135_c0_g1_i1.path2
TRINITY_DN52884_c0_g1_i1.path1	Pepsico2_Contig6486.path1	TRINITY_DN88632_c0_g1_i1.path1	TRINITY_DN11303_c1_g1_i4.path2		novel.10173	TRINITY_DN33361_c0_g1_i5.path2	Pepsico2_Contig17730.path1	Pepsico2_Contig2646.path1
TRINITY_DN19228_c0_g1_i7.path1	TRINITY_DN107367_c0_g1_i1.path1	TRINITY_DN16801_c1_g3_i1.path1	TRINITY_DN33800_c0_g1_i2.path2		novel.82	TRINITY_DN16702_c0_g1_i1.path1	TRINITY_DN4444_c0_g1_i1.path1	TRINITY_DN14241_c0_g1_i1.path1
TRINITY_DN17793_c0_g3_i2.path1	novel.1005	TRINITY_DN14541_c0_g1_i1.path2	TRINITY_DN85435_c0_g1_i1.path1		TRINITY_DN13702_c0_g1_i2.path1	novel.4975	Pepsico2_Contig11242.path1	TRINITY_DN21016_c0_g1_i1.path1
Pepsico2_Contig7676.path1	TRINITY_DN21832_c0_g1_i1.path1	novel.5192	Pepsico2_Contig7754.path1		TRINITY_DN8622_c0_g1_i2.path1	Pepsico2_Contig17168.path2	Pepsico2_Contig17682.path1	Pepsico2_Contig18089.path1
Pepsico1_Contig37083.path1	TRINITY_DN7066_c0_g1_i2.path1	TRINITY_DN11717_c0_g2_i2.path1	TRINITY_DN5707_c0_g1_i2.path3		TRINITY_DN29865_c0_g1_i1.path2	Pepsico2_Contig7935.path1	novel.5378	TRINITY_DN21860_c0_g3_i2.path1
novel.1627	TRINITY_DN16522_c0_g1_i3.path2	novel.2946	TRINITY_DN506_c0_g1_i4.path1		Pepsico2_Contig3793.path1	TRINITY_DN475_c0_g1_i14.path1	TRINITY_DN34621_c0_g1_i1.path2	TRINITY_DN12929_c0_g1_i1.path2
TRINITY_DN25583_c0_g2_i1.path1	Pepsico1_Contig3087.path1	TRINITY_DN42170_c0_g1_i1.path1	TRINITY_DN23496_c0_g1_i2.path2		TRINITY_DN36206_c0_g1_i1.path1	TRINITY_DN6189_c0_g2_i2.path1	TRINITY_DN12040_c0_g1_i15.path2	novel.10107
novel.3930	Pepsico2_Contig12695.path2	novel.8191	TRINITY_DN37338_c0_g2_i1.path1		TRINITY_DN4885_c0_g3_i1.path1	TRINITY_DN693_c1_g1_i1.path1	TRINITY_DN33391_c0_g1_i1.path1	TRINITY_DN7172_c1_g1_i6.path1
TRINITY_DN582_c2_g1_i6.path1	novel.1001	TRINITY_DN4604_c0_g2_i1.path1	TRINITY_DN27615_c0_g1_i1.path1		TRINITY_DN47074_c0_g1_i1.path1	Pepsico1_Contig6612.path2	TRINITY_DN11593_c1_g2_i1.path1	novel.7249
TRINITY_DN31162_c0_g2_i2.path1	TRINITY_DN18061_c0_g1_i1.path1	TRINITY_DN112171_c0_g1_i1.path1	novel.4447		Pepsico2_Contig17438.path1	TRINITY_DN8322_c0_g1_i1.path1	Pepsico2_Contig7935.path1	Pepsico2_Contig8757.path1
Pepsico1_Contig4640.path2	TRINITY_DN20672_c0_g1_i1.path3	Pepsico1_Contig6230.path1	novel.6906		TRINITY_DN41323_c0_g1_i2.path1	TRINITY_DN21408_c0_g2_i1.path1	Pepsico2_Contig8794.path2	novel.8517
TRINITY_DN4491_c1_g1_i6.path1	TRINITY_DN87900_c0_g1_i1.path1	TRINITY_DN12758_c1_g1_i2.path1	TRINITY_DN4979_c0_g2_i5.path2		TRINITY_DN11155_c0_g1_i2.path1	novel.8191	Pepsico1_Contig3406.path1	TRINITY_DN30388_c0_g1_i1.path1
novel.2463	TRINITY_DN5109_c0_g1_i2.path1	novel.8810	TRINITY_DN71999_c0_g1_i1.path1		TRINITY_DN78657_c0_g1_i1.path1	Pepsico2_Contig17090.path1	TRINITY_DN19392_c0_g2_i1.path1	novel.1489
TRINITY_DN15158_c0_g2_i1.path1	novel.8711	TRINITY_DN934_c0_g1_i1.path1	Pepsico2_Contig17682.path1		TRINITY_DN46578_c0_g1_i1.path1	TRINITY_DN103518_c0_g1_i1.path1	Pepsico2_Contig19554.path1	TRINITY_DN24121_c0_g1_i1.path1
TRINITY_DN92367_c0_g1_i1.path2	TRINITY_DN19086_c0_g1_i2.path1	TRINITY_DN16826_c0_g1_i2.path1	Pepsico2_Contig7277.path1		TRINITY_DN11437_c0_g1_i2.path1	TRINITY_DN43227_c1_g1_i2.path1	Pepsico2_Contig3476.path1	TRINITY_DN6909_c0_g1_i6.path1
novel.4778	Pepsico1_Contig4201.path1	TRINITY_DN628_c0_g2_i3.path1	TRINITY_DN320_c0_g1_i1.path1		TRINITY_DN28232_c0_g1_i2.path1	TRINITY_DN31076_c0_g1_i4.path1	TRINITY_DN20622_c0_g1_i4.path1	Pepsico1_Contig3923.path1
TRINITY_DN20945_c0_g1_i4.path1	novel.2076	Pepsico2_Contig17052.path1	novel.9974		TRINITY_DN7703_c1_g1_i1.path2	novel.3663	TRINITY_DN648_c1_g1_i8.path2	novel.6101
novel.5080	TRINITY_DN3707_c0_g1_i10.path1	TRINITY_DN39623_c0_g1_i1.path1	novel.2121		TRINITY_DN15545_c0_g2_i1.path1	Pepsico1_Contig6573.path1	Pepsico1_Contig2008.path3	Pepsico2_Contig2625.path1
Pepsico1_Contig8489.path2	novel.1427	TRINITY_DN25014_c0_g1_i3.path1	Pepsico2_Contig6501.path1		TRINITY_DN17774_c0_g2_i1.path1	TRINITY_DN9898_c0_g2_i1.path1	novel.10237	Pepsico2_Contig8201.path1
Pepsico1_Contig35521.path1	Pepsico2_Contig16982.path1	TRINITY_DN9623_c0_g1_i1.path2	TRINITY_DN29334_c0_g1_i1.path1		Pepsico2_Contig3317.path1	TRINITY_DN86212_c0_g1_i1.path1	TRINITY_DN2492_c0_g1_i1.path1	Pepsico2_Contig11065.path1
novel.415	Pepsico2_Contig3832.path1	novel.7165	novel.2160		Pepsico2_Contig344.path2	TRINITY_DN29271_c0_g1_i2.path1	Pepsico1_Contig22394.path1	TRINITY_DN2210_c0_g1_i2.path1
Pepsico2_Contig15480.path1	Pepsico2_Contig20865.path1	TRINITY_DN63758_c0_g1_i1.path1	TRINITY_DN14497_c0_g1_i2.path1		Pepsico1_Contig71.path1	TRINITY_DN15185_c0_g3_i5.path1	TRINITY_DN17502_c0_g1_i2.path1	TRINITY_DN29640_c0_g3_i1.path1
TRINITY_DN21152_c1_g1_i1.path1	novel.9472	TRINITY_DN19368_c0_g1_i7.path1	Pepsico2_Contig12155.path1		TRINITY_DN28234_c0_g2_i1.path2	Pepsico2_Contig4851.path1	TRINITY_DN14383_c0_g2_i2.path1	novel.2343
Pepsico2_Contig12945.path1	TRINITY_DN32389_c0_g1_i1.path1	TRINITY_DN32525_c0_g1_i1.path1	TRINITY_DN3768_c0_g1_i9.path2		novel.9812	Pepsico2_Contig13121.path1	Pepsico1_Contig5497.path1	TRINITY_DN5235_c0_g2_i1.path1
TRINITY_DN104051_c0_g1_i1.path1	Pepsico2_Contig4818.path1	Pepsico2_Contig7109.path1	TRINITY_DN20672_c0_g1_i1.path3		Pepsico2_Contig8228.path1	TRINITY_DN10190_c0_g1_i5.path1	Pepsico2_Contig6846.path1	TRINITY_DN18348_c1_g1_i1.path1
TRINITY_DN6995_c1_g2_i1.path2	TRINITY_DN12178_c0_g1_i2.path1	TRINITY_DN13963_c1_g1_i1.path1	TRINITY_DN693_c1_g1_i1.path1		TRINITY_DN7328_c1_g1_i1.path1	TRINITY_DN12603_c0_g1_i2.path1	TRINITY_DN16295_c0_g1_i1.path2	TRINITY_DN39737_c0_g1_i1.path1
TRINITY_DN3452_c1_g1_i3.path1	Pepsico2_Contig2528.path1	TRINITY_DN19228_c0_g1_i7.path1	TRINITY_DN14704_c0_g1_i1.path2		TRINITY_DN21706_c1_g1_i1.path1	novel.10607	TRINITY_DN11768_c0_g1_i1.path1	Pepsico2_Contig6611.path4
TRINITY_DN3664_c0_g3_i1.path1	Pepsico2_Contig8025.path1	TRINITY_DN15272_c1_g1_i1.path2	TRINITY_DN25751_c0_g1_i2.path1		novel.1098	Pepsico2_Contig17640.path1	Pepsico2_Contig11038.path1	novel.9668
TRINITY_DN16311_c0_g1_i3.path1	TRINITY_DN43131_c0_g1_i2.path1	novel.9589	novel.5188		TRINITY_DN74997_c0_g1_i1.path1	novel.4598	TRINITY_DN3070_c1_g1_i2.path2	TRINITY_DN19084_c0_g1_i4.path1
TRINITY_DN5010_c0_g1_i1.path1	TRINITY_DN36995_c0_g1_i1.path1	Pepsico1_Contig5126.path1	novel.7660		TRINITY_DN33163_c1_g1_i1.path1	Pepsico2_Contig18181.path1	novel.3694	TRINITY_DN91483_c0_g1_i1.path1
Pepsico2_Contig12504.path1	Pepsico2_Contig18121.path1	TRINITY_DN200_c0_g1_i2.path1	novel.1312		TRINITY_DN27316_c0_g1_i2.path2	novel.6272	novel.8294	novel.8600
Pepsico2_Contig15050.path1	TRINITY_DN60146_c0_g1_i1.path1	TRINITY_DN15126_c0_g1_i1.path1	novel.5303		novel.8808	TRINITY_DN34544_c0_g1_i2.path1	Pepsico2_Contig17149.path1	Pepsico2_Contig1002.path1
Pepsico2_Contig7839.path2	Pepsico1_Contig32727.path2	novel.9912	Pepsico1_Contig1934.path1		TRINITY_DN5704_c0_g7_i1.path1	TRINITY_DN9236_c0_g2_i5.path1	Pepsico2_Contig3832.path2	novel.5375
TRINITY_DN1583_c0_g1_i1.path1	TRINITY_DN3489_c0_g1_i2.path1	TRINITY_DN18829_c1_g1_i1.path2	TRINITY_DN65352_c0_g1_i1.path1		TRINITY_DN20630_c0_g1_i1.path1	TRINITY_DN2385_c0_g1_i1.path2	Pepsico2_Contig19412.path1	TRINITY_DN39335_c0_g1_i1.path1
TRINITY_DN3369_c0_g1_i2.path2	TRINITY_DN17858_c0_g1_i4.path1	novel.4778	TRINITY_DN36030_c0_g1_i1.path1		TRINITY_DN29954_c0_g1_i1.path1	TRINITY_DN26545_c0_g1_i1.path1	TRINITY_DN1968_c0_g1_i4.path1	Pepsico2_Contig17288.path1
TRINITY_DN40941_c1_g1_i1.path1	Pepsico1_Contig6100.path1	novel.7396	novel.1427		Pepsico2_Contig17478.path1	Pepsico1_Contig6958.path2	TRINITY_DN22733_c1_g1_i3.path1	TRINITY_DN14383_c0_g2_i2.path1
Pepsico2_Contig3516.path1	novel.3853	Pepsico2_Contig17047.path1	TRINITY_DN8291_c1_g3_i8.path1		TRINITY_DN34756_c0_g1_i5.path1	novel.5499	TRINITY_DN18179_c0_g2_i1.path2	Pepsico2_Contig367.path1
TRINITY_DN71899_c0_g1_i2.path1	TRINITY_DN826_c0_g1_i8.path2	TRINITY_DN21253_c0_g5_i1.path1	novel.5643		TRINITY_DN45040_c0_g2_i1.path2	Pepsico2_Contig20286.path1	Pepsico1_Contig7174.path1	TRINITY_DN11920_c1_g2_i1.path1
Pepsico2_Contig12826.path1	novel.5310	Pepsico2_Contig12177.path2	novel.2556		TRINITY_DN7216_c1_g2_i1.path1	TRINITY_DN18692_c2_g1_i1.path1	TRINITY_DN21706_c0_g1_i3.path1	novel.9671
Pepsico2_Contig7869.path1	TRINITY_DN32075_c0_g5_i3.path1	Pepsico2_Contig8620.path1	novel.4652		TRINITY_DN20276_c0_g1_i2.path1	Pepsico2_Contig17849.path1	TRINITY_DN7216_c1_g2_i1.path1	novel.682
TRINITY_DN12222_c0_g1_i8.path1	TRINITY_DN36731_c0_g1_i1.path2	Pepsico1_Contig4678.path1	TRINITY_DN59616_c0_g1_i1.path1		TRINITY_DN17358_c1_g3_i2.path1	TRINITY_DN24420_c0_g1_i1.path1	novel.4694	TRINITY_DN7653_c0_g2_i2.path1
TRINITY_DN26096_c0_g1_i4.path1	TRINITY_DN38078_c0_g1_i1.path1	Pepsico1_Contig340.path1	novel.5777		novel.9216	TRINITY_DN15372_c0_g1_i1.path1	novel.7403	novel.4885
TRINITY_DN8001_c0_g1_i3.path1	TRINITY_DN25014_c0_g1_i3.path1	novel.836	novel.5334		TRINITY_DN30998_c0_g1_i1.path1	novel.7290	novel.7010	Pepsico2_Contig11033.path1
novel.6124	TRINITY_DN4515_c0_g1_i17.path2	Pepsico2_Contig8034.path1	Pepsico2_Contig17803.path1		TRINITY_DN20569_c0_g1_i1.path1	Pepsico2_Contig17803.path1	TRINITY_DN44824_c0_g1_i1.path5	Pepsico2_Contig20778.path1
Pepsico2_Contig16922.path1	TRINITY_DN25186_c0_g1_i1.path3	novel.4236	TRINITY_DN2337_c0_g1_i6.path2		Pepsico2_Contig5887.path1	Pepsico2_Contig20185.path1	Pepsico1_Contig47.path2	TRINITY_DN13609_c0_g1_i3.path1
TRINITY_DN8849_c1_g1_i7.path1	novel.4253	Pepsico2_Contig17149.path2	novel.2561		TRINITY_DN32187_c0_g1_i1.path1	Pepsico1_Contig26.path1	TRINITY_DN11076_c0_g1_i1.path2	TRINITY_DN21357_c0_g1_i1.path1
novel.5375	novel.10217	novel.42	novel.7203		TRINITY_DN977_c0_g1_i5.path1	TRINITY_DN45039_c0_g1_i1.path1	TRINITY_DN85820_c0_g1_i1.path1	TRINITY_DN18844_c0_g1_i1.path1
TRINITY_DN16858_c0_g1_i2.path1	novel.2086	Pepsico1_Contig32727.path2	novel.7846		novel.9193	Pepsico1_Contig2405.path1	novel.2564	TRINITY_DN21996_c0_g1_i1.path1
novel.2096	TRINITY_DN21761_c0_g1_i1.path2	Pepsico2_Contig15659.path2	novel.2231		novel.5524	TRINITY_DN24342_c0_g2_i1.path1	TRINITY_DN13022_c0_g1_i1.path1	Pepsico2_Contig4586.path1
novel.2598	TRINITY_DN31623_c1_g1_i1.path1	TRINITY_DN14410_c0_g1_i1.path1	Pepsico2_Contig13147.path1		TRINITY_DN28104_c0_g1_i2.path1	TRINITY_DN16543_c0_g2_i1.path1	TRINITY_DN1139_c0_g1_i1.path1	TRINITY_DN57099_c0_g1_i2.path1
novel.9333	TRINITY_DN15198_c0_g2_i2.path2	TRINITY_DN79603_c0_g1_i1.path1	TRINITY_DN65056_c0_g1_i1.path2		TRINITY_DN10280_c0_g1_i1.path1	TRINITY_DN18366_c0_g1_i1.path2	TRINITY_DN21931_c0_g1_i2.path1	novel.6580
TRINITY_DN17519_c0_g1_i3.path1	Pepsico1_Contig5244.path1	Pepsico2_Contig17521.path1	TRINITY_DN35875_c0_g1_i1.path1		TRINITY_DN16286_c0_g1_i4.path1	TRINITY_DN7216_c1_g2_i1.path1	TRINITY_DN685_c1_g2_i1.path2	novel.503
Pepsico1_Contig22394.path1	Pepsico1_Contig5337.path1	TRINITY_DN91049_c0_g1_i1.path2	Pepsico2_Contig5819.path1		TRINITY_DN26422_c0_g2_i2.path1	Pepsico1_Contig3669.path1	TRINITY_DN108772_c0_g1_i1.path1	TRINITY_DN19946_c0_g1_i1.path1
TRINITY_DN36862_c0_g1_i1.path1	TRINITY_DN12417_c0_g2_i1.path1	novel.8600	Pepsico2_Contig18331.path1		Pepsico2_Contig10102.path2	TRINITY_DN36731_c0_g1_i1.path1	TRINITY_DN30113_c0_g1_i1.path1	novel.7507
novel.6695	TRINITY_DN18906_c0_g1_i8.path1	novel.5006	novel.8601		TRINITY_DN5401_c0_g1_i7.path1	Pepsico2_Contig18670.path1	novel.10231	Pepsico2_Contig1759.path2
TRINITY_DN29428_c0_g2_i1.path1	novel.4048	Pepsico2_Contig12155.path1	TRINITY_DN672_c1_g3_i2.path1		Pepsico2_Contig6120.path1	TRINITY_DN32638_c0_g1_i1.path1	novel.857	TRINITY_DN9040_c0_g1_i1.path1
TRINITY_DN12417_c0_g2_i1.path1	novel.224	Pepsico2_Contig6569.path1	TRINITY_DN40354_c0_g1_i2.path1		TRINITY_DN63914_c0_g1_i1.path2	TRINITY_DN50091_c1_g1_i1.path1	TRINITY_DN11167_c2_g1_i1.path1	TRINITY_DN11282_c2_g1_i1.path1
TRINITY_DN114484_c0_g1_i1.path1	TRINITY_DN2414_c0_g2_i1.path1	TRINITY_DN4027_c5_g1_i1.path3	TRINITY_DN16599_c0_g1_i1.path1		TRINITY_DN16223_c0_g2_i1.path1	novel.1447	Pepsico2_Contig8136.path1	TRINITY_DN87_c0_g1_i1.path2
TRINITY_DN11538_c0_g2_i1.path1	Pepsico1_Contig521.path1	TRINITY_DN2337_c0_g2_i1.path1	TRINITY_DN10932_c1_g1_i1.path2		TRINITY_DN19805_c1_g1_i2.path1	Pepsico2_Contig14315.path1	novel.2742	TRINITY_DN5970_c2_g1_i1.path1
novel.224	Pepsico2_Contig8620.path1	Pepsico1_Contig892.path2	Pepsico1_Contig1433.path1		TRINITY_DN28588_c2_g1_i1.path1	TRINITY_DN29329_c0_g2_i1.path1	novel.7060	TRINITY_DN108802_c0_g1_i1.path1
novel.5121	novel.1265	novel.3557	novel.2466		Pepsico2_Contig15502.path1	novel.7060	TRINITY_DN245_c0_g2_i1.path1	TRINITY_DN431_c0_g1_i7.path2
Pepsico1_Contig37830.path1	Pepsico2_Contig17052.path2	TRINITY_DN37338_c0_g2_i1.path1	TRINITY_DN30872_c0_g1_i1.path1		TRINITY_DN10806_c1_g2_i8.path1	TRINITY_DN35487_c0_g1_i2.path1	Pepsico2_Contig5996.path2	novel.5378
TRINITY_DN26034_c0_g2_i1.path1	TRINITY_DN55875_c0_g1_i2.path1	TRINITY_DN18829_c1_g1_i1.path3	TRINITY_DN22934_c1_g3_i2.path1		TRINITY_DN10443_c1_g1_i1.path1	TRINITY_DN5144_c0_g1_i8.path2	novel.5189	TRINITY_DN11760_c0_g1_i2.path1
TRINITY_DN23998_c0_g1_i6.path1	TRINITY_DN115544_c0_g1_i1.path1	novel.7060	Pepsico1_Contig4004.path3		novel.4643	TRINITY_DN74489_c0_g1_i1.path1	TRINITY_DN24065_c0_g1_i1.path1	TRINITY_DN16114_c0_g1_i3.path1
Pepsico2_Contig7784.path1	TRINITY_DN11047_c0_g1_i1.path1	novel.2816	novel.3230		novel.4180	TRINITY_DN19392_c0_g2_i1.path1	Pepsico1_Contig32727.path1	TRINITY_DN19031_c0_g2_i1.path1
TRINITY_DN31212_c0_g1_i1.path1	TRINITY_DN33307_c0_g1_i2.path1	novel.9840	TRINITY_DN30388_c0_g1_i1.path1		novel.7978	TRINITY_DN52884_c0_g1_i1.path1	TRINITY_DN10873_c0_g2_i1.path1	TRINITY_DN8830_c0_g1_i19.path3
novel.9764	Pepsico1_Contig36864.path1	TRINITY_DN15198_c0_g2_i2.path2	Pepsico1_Contig2674.path1		Pepsico2_Contig7175.path1	Pepsico2_Contig7794.path1	TRINITY_DN18491_c0_g1_i3.path1	novel.6796
TRINITY_DN9120_c1_g1_i2.path1	novel.3116	TRINITY_DN28048_c0_g1_i1.path2	TRINITY_DN4225_c0_g1_i11.path1		novel.7047	novel.2707	Pepsico2_Contig15361.path2	TRINITY_DN19732_c1_g1_i2.path2
Pepsico2_Contig19530.path1	TRINITY_DN21686_c1_g1_i1.path1	TRINITY_DN11181_c0_g1_i3.path1	novel.4061		TRINITY_DN34394_c0_g1_i1.path1	TRINITY_DN24768_c0_g2_i1.path2	Pepsico2_Contig16525.path1	Pepsico2_Contig19452.path1
TRINITY_DN30966_c0_g1_i1.path1	novel.1566	TRINITY_DN11282_c1_g2_i1.path1	TRINITY_DN28423_c0_g1_i1.path1		TRINITY_DN20875_c0_g1_i1.path2	TRINITY_DN30131_c0_g1_i2.path1	TRINITY_DN18095_c0_g1_i1.path1	novel.4643
TRINITY_DN11511_c0_g3_i2.path1	TRINITY_DN30446_c0_g1_i1.path2	Pepsico2_Contig10648.path1	novel.6980		Pepsico2_Contig12416.path1	TRINITY_DN6989_c0_g1_i1.path1	TRINITY_DN22464_c0_g1_i3.path1	Pepsico2_Contig18864.path1
novel.2086	TRINITY_DN3677_c0_g1_i9.path1	TRINITY_DN47408_c0_g1_i1.path1	TRINITY_DN13705_c0_g4_i1.path1		TRINITY_DN6533_c1_g3_i1.path3	Pepsico1_Contig71.path1	TRINITY_DN9612_c0_g1_i1.path2	TRINITY_DN11470_c0_g1_i1.path1
TRINITY_DN16826_c0_g1_i2.path1	TRINITY_DN59891_c1_g1_i2.path1	TRINITY_DN2210_c0_g1_i2.path1	Pepsico2_Contig20029.path1		TRINITY_DN26906_c0_g1_i7.path1	TRINITY_DN1148_c0_g1_i2.path1	novel.3837	novel.7111
TRINITY_DN40672_c0_g1_i1.path2	TRINITY_DN20966_c0_g5_i1.path1	novel.158	novel.6992		TRINITY_DN93633_c0_g1_i1.path1	TRINITY_DN10242_c0_g1_i5.path2	novel.6691	TRINITY_DN52884_c0_g1_i1.path1
TRINITY_DN32418_c0_g1_i1.path1	Pepsico1_Contig6523.path1	Pepsico2_Contig20608.path1	TRINITY_DN88218_c0_g1_i2.path1		Pepsico2_Contig16877.path1	Pepsico2_Contig11017.path2	TRINITY_DN10620_c0_g1_i4.path1	TRINITY_DN65824_c0_g1_i1.path1
TRINITY_DN10178_c0_g1_i1.path1	novel.4908	Pepsico2_Contig367.path1	TRINITY_DN933_c0_g1_i4.path1		TRINITY_DN7382_c0_g1_i2.path1	novel.280	Pepsico2_Contig14670.path1	novel.51
TRINITY_DN41330_c0_g1_i2.path2	novel.829	novel.2937	novel.6930		TRINITY_DN5938_c0_g3_i1.path1	TRINITY_DN84840_c0_g1_i1.path1	TRINITY_DN25120_c0_g1_i1.path1	TRINITY_DN69825_c0_g1_i1.path1
novel.6297	TRINITY_DN1567_c0_g1_i5.path1	TRINITY_DN2977_c0_g1_i11.path1	TRINITY_DN35164_c0_g1_i1.path1		novel.5653	TRINITY_DN76151_c0_g1_i1.path1	Pepsico2_Contig19452.path1	Pepsico1_Contig32727.path2
TRINITY_DN36478_c0_g1_i3.path1	Pepsico1_Contig33380.path1	TRINITY_DN25751_c0_g1_i2.path1	novel.8529		TRINITY_DN32053_c1_g1_i1.path1	TRINITY_DN9225_c0_g1_i1.path1	TRINITY_DN1827_c0_g2_i1.path1	novel.8805
TRINITY_DN18448_c0_g1_i2.path2	TRINITY_DN4477_c0_g1_i1.path1	novel.7557	Pepsico2_Contig12692.path5		TRINITY_DN48186_c0_g1_i1.path1	TRINITY_DN9040_c0_g1_i1.path1	TRINITY_DN102507_c0_g1_i1.path1	novel.7371
Pepsico2_Contig20487.path1	TRINITY_DN51062_c0_g1_i1.path2	TRINITY_DN47451_c0_g1_i2.path1	TRINITY_DN2809_c0_g1_i14.path1		TRINITY_DN21046_c0_g1_i1.path1	TRINITY_DN22824_c0_g1_i2.path1	novel.5145	novel.2816
TRINITY_DN71809_c0_g1_i1.path1	Pepsico2_Contig8305.path1	TRINITY_DN15788_c0_g1_i1.path1	TRINITY_DN1040_c0_g1_i1.path1		Pepsico2_Contig8590.path1	novel.2921	Pepsico2_Contig11017.path1	TRINITY_DN35335_c0_g4_i2.path1
novel.6132	TRINITY_DN22038_c0_g1_i2.path1	novel.6630	TRINITY_DN20691_c0_g1_i1.path1		TRINITY_DN54245_c0_g1_i1.path1	Pepsico1_Contig3469.path1	novel.6785	Pepsico2_Contig17712.path1
novel.4607	TRINITY_DN20944_c0_g1_i5.path1	novel.7783	Pepsico2_Contig19863.path2		novel.9652	TRINITY_DN99713_c0_g1_i1.path1	TRINITY_DN30131_c0_g1_i2.path1	TRINITY_DN35472_c1_g1_i1.path1
Pepsico1_Contig3093.path2	novel.302	TRINITY_DN26045_c0_g1_i4.path1	novel.1535		TRINITY_DN6632_c0_g2_i1.path1	Pepsico2_Contig3317.path1	novel.8191	TRINITY_DN28234_c0_g2_i1.path2
TRINITY_DN9007_c0_g1_i2.path1	TRINITY_DN33623_c0_g1_i3.path1	Pepsico2_Contig3799.path1	Pepsico2_Contig13425.path1		novel.7044	TRINITY_DN2377_c0_g1_i1.path1	Pepsico2_Contig17550.path2	Pepsico2_Contig5887.path1
novel.6583	TRINITY_DN19031_c0_g2_i1.path1	TRINITY_DN35580_c0_g1_i6.path1	TRINITY_DN76691_c0_g1_i1.path1		Pepsico2_Contig752.path1	novel.9668	TRINITY_DN2450_c1_g2_i1.path1	TRINITY_DN29095_c0_g1_i2.path1
TRINITY_DN18491_c0_g1_i3.path1	TRINITY_DN5273_c0_g1_i2.path2	TRINITY_DN112088_c0_g1_i1.path1	novel.2123		TRINITY_DN45570_c0_g1_i1.path1	TRINITY_DN14495_c0_g1_i2.path1	TRINITY_DN22584_c0_g2_i1.path1	TRINITY_DN19578_c0_g2_i1.path1
Pepsico1_Contig5244.path1	TRINITY_DN24121_c0_g1_i1.path1	TRINITY_DN13202_c0_g1_i2.path1	TRINITY_DN30131_c0_g1_i2.path1		TRINITY_DN42903_c0_g1_i1.path1	novel.5601	TRINITY_DN4204_c0_g1_i1.path1	TRINITY_DN45570_c0_g1_i1.path1
Pepsico1_Contig3010.path1	novel.5704	TRINITY_DN31162_c0_g2_i2.path1	TRINITY_DN24179_c1_g1_i1.path1		Pepsico2_Contig19740.path1	TRINITY_DN15455_c0_g1_i7.path2	TRINITY_DN4491_c1_g1_i6.path1	Pepsico2_Contig9040.path1
Pepsico2_Contig8333.path3	novel.1655	TRINITY_DN48958_c0_g1_i2.path1	Pepsico2_Contig8166.path1		TRINITY_DN79783_c0_g1_i1.path1	Pepsico2_Contig19613.path1	TRINITY_DN2567_c0_g1_i1.path3	TRINITY_DN42306_c0_g1_i3.path1
TRINITY_DN12897_c0_g1_i1.path3	Pepsico2_Contig20029.path1	novel.2119	novel.7086		novel.1825	Pepsico2_Contig6539.path1	TRINITY_DN15905_c1_g1_i1.path2	TRINITY_DN43817_c0_g1_i1.path1
TRINITY_DN7795_c0_g1_i6.path1	TRINITY_DN34417_c0_g2_i1.path1	TRINITY_DN5076_c0_g1_i5.path1	TRINITY_DN739_c0_g1_i2.path1		novel.2466	novel.5625	TRINITY_DN107367_c0_g1_i1.path1	TRINITY_DN11477_c1_g2_i1.path1
TRINITY_DN23750_c0_g1_i4.path1	TRINITY_DN8089_c0_g1_i3.path1	Pepsico2_Contig19863.path2	TRINITY_DN28549_c0_g1_i1.path2		TRINITY_DN6049_c0_g1_i2.path1	novel.8801	TRINITY_DN38122_c0_g1_i1.path1	Pepsico2_Contig7436.path1
TRINITY_DN76737_c0_g1_i1.path1	TRINITY_DN41519_c0_g1_i1.path1	TRINITY_DN19953_c0_g1_i3.path1	TRINITY_DN36713_c0_g1_i3.path1		Pepsico1_Contig7444.path1	TRINITY_DN4975_c0_g1_i3.path2	TRINITY_DN2850_c0_g3_i1.path1	Pepsico1_Contig5048.path1
novel.7840	TRINITY_DN79890_c0_g1_i1.path2	Pepsico2_Contig20342.path1	TRINITY_DN9400_c0_g1_i4.path3		Pepsico2_Contig19669.path2	TRINITY_DN22038_c0_g1_i2.path1	TRINITY_DN56186_c0_g1_i1.path1	TRINITY_DN32159_c0_g1_i1.path3
TRINITY_DN106160_c0_g1_i1.path1	TRINITY_DN40297_c1_g1_i1.path1	TRINITY_DN19739_c0_g1_i1.path1	novel.1301		TRINITY_DN13490_c0_g1_i5.path1	TRINITY_DN24347_c0_g1_i2.path1	Pepsico1_Contig5244.path1	Pepsico2_Contig20155.path1
TRINITY_DN2809_c0_g1_i14.path1	TRINITY_DN25384_c0_g2_i1.path3	TRINITY_DN12381_c0_g1_i1.path1	TRINITY_DN12300_c0_g2_i1.path1		Pepsico2_Contig2406.path1	novel.3405	TRINITY_DN11181_c0_g1_i3.path1	TRINITY_DN15455_c0_g1_i7.path2
TRINITY_DN20944_c0_g1_i5.path1	TRINITY_DN21106_c0_g1_i1.path3	Pepsico2_Contig14825.path1	TRINITY_DN23948_c0_g1_i1.path1		Pepsico2_Contig17712.path1	Pepsico2_Contig17718.path1	novel.8492	TRINITY_DN52988_c0_g1_i1.path1
Pepsico2_Contig17410.path1	TRINITY_DN8820_c0_g1_i1.path3	novel.2086	novel.2937		TRINITY_DN3941_c0_g1_i4.path1	TRINITY_DN36941_c0_g1_i1.path1	TRINITY_DN10907_c0_g2_i2.path1	TRINITY_DN17413_c0_g4_i2.path1
Pepsico2_Contig20778.path1	Pepsico1_Contig36864.path2	Pepsico2_Contig1185.path2	novel.8182		novel.3621	novel.3878	TRINITY_DN112669_c0_g1_i1.path1	TRINITY_DN8925_c0_g1_i1.path1
TRINITY_DN14595_c1_g1_i1.path1	Pepsico2_Contig17682.path1	TRINITY_DN20518_c0_g1_i1.path2	TRINITY_DN28026_c0_g1_i1.path1		TRINITY_DN1917_c0_g1_i1.path1	novel.10141	novel.9668	TRINITY_DN52025_c0_g2_i1.path1
novel.10042	Pepsico2_Contig7718.path1	TRINITY_DN20585_c0_g1_i1.path1	novel.3578		TRINITY_DN28303_c0_g1_i1.path2	Pepsico2_Contig7831.path1	Pepsico2_Contig3750.path1	TRINITY_DN9845_c0_g1_i2.path1
TRINITY_DN106297_c0_g1_i1.path1	TRINITY_DN59933_c0_g1_i1.path1	TRINITY_DN27890_c0_g1_i1.path1	TRINITY_DN112536_c0_g1_i1.path1		TRINITY_DN22092_c0_g1_i2.path2	TRINITY_DN15545_c0_g2_i1.path1	Pepsico1_Contig1620.path2	TRINITY_DN15392_c0_g1_i1.path1
TRINITY_DN3266_c0_g2_i3.path1	TRINITY_DN236_c0_g1_i2.path1	Pepsico1_Contig1245.path1	Pepsico2_Contig337.path1		TRINITY_DN33916_c0_g1_i1.path1	novel.2367	TRINITY_DN35060_c1_g1_i1.path1	Pepsico2_Contig13659.path1
Pepsico2_Contig11464.path2	novel.2582	TRINITY_DN30150_c0_g1_i1.path1	Pepsico2_Contig16831.path1		TRINITY_DN51764_c0_g2_i1.path1	TRINITY_DN21706_c0_g2_i1.path1	TRINITY_DN12947_c0_g1_i4.path1	TRINITY_DN14061_c0_g2_i1.path1
novel.2238	novel.9025	TRINITY_DN44824_c0_g1_i1.path5	Pepsico2_Contig11410.path1		TRINITY_DN110684_c0_g1_i1.path1	TRINITY_DN15198_c0_g1_i2.path2	TRINITY_DN24768_c0_g2_i1.path2	TRINITY_DN18117_c0_g1_i3.path3
TRINITY_DN87855_c0_g1_i1.path1	TRINITY_DN99485_c0_g1_i1.path1	TRINITY_DN494_c0_g1_i1.path1	Pepsico1_Contig3833.path2		TRINITY_DN42903_c0_g1_i1.path2	TRINITY_DN11600_c0_g1_i1.path1	Pepsico2_Contig9084.path1	novel.3904
Pepsico1_Contig847.path1	TRINITY_DN27567_c0_g1_i1.path1	TRINITY_DN21996_c0_g1_i1.path1	TRINITY_DN20994_c0_g1_i1.path2		TRINITY_DN38725_c0_g1_i2.path1	TRINITY_DN36164_c0_g1_i1.path1	TRINITY_DN4515_c0_g1_i17.path3	TRINITY_DN28038_c0_g1_i1.path1
TRINITY_DN90231_c0_g1_i1.path1	TRINITY_DN12659_c0_g1_i5.path1	Pepsico2_Contig19828.path1	novel.7249		TRINITY_DN26708_c0_g1_i1.path1	novel.6761	novel.1301	novel.10217
novel.9584	TRINITY_DN35060_c1_g1_i1.path1	novel.1625	TRINITY_DN21686_c1_g1_i1.path1		novel.6752	TRINITY_DN14779_c0_g2_i1.path1	novel.650	TRINITY_DN25758_c0_g1_i2.path1
TRINITY_DN23612_c0_g1_i2.path1	TRINITY_DN59954_c0_g1_i3.path1	novel.1427	TRINITY_DN14314_c1_g1_i2.path1		TRINITY_DN83276_c0_g1_i1.path1	novel.2030	novel.8998	Pepsico1_Contig332.path2
Pepsico2_Contig6438.path1	Pepsico2_Contig7954.path1	TRINITY_DN5109_c0_g1_i2.path1	novel.9736		TRINITY_DN1534_c0_g1_i1.path1	Pepsico2_Contig20569.path3	TRINITY_DN14356_c1_g1_i10.path2	Pepsico2_Contig18624.path1
TRINITY_DN94754_c0_g1_i1.path1	TRINITY_DN113066_c0_g1_i1.path1	TRINITY_DN11478_c0_g1_i4.path2	TRINITY_DN30069_c0_g2_i1.path1		TRINITY_DN626_c0_g3_i1.path2	TRINITY_DN44824_c0_g1_i1.path5	TRINITY_DN103453_c0_g1_i1.path1	TRINITY_DN24498_c0_g1_i2.path1
TRINITY_DN8122_c0_g1_i5.path1	novel.5375	novel.5643	TRINITY_DN13963_c1_g1_i1.path1		TRINITY_DN12660_c2_g1_i1.path1	Pepsico2_Contig243.path1	TRINITY_DN17775_c0_g2_i1.path1	Pepsico2_Contig6303.path1
Pepsico1_Contig20808.path2	TRINITY_DN9845_c0_g1_i2.path1	novel.4061	TRINITY_DN249_c0_g3_i1.path1		Pepsico1_Contig1872.path2	TRINITY_DN10451_c0_g1_i2.path2	Pepsico2_Contig3519.path1	novel.4049
Pepsico2_Contig20128.path1	TRINITY_DN3634_c0_g1_i4.path1	TRINITY_DN18756_c0_g1_i1.path1	TRINITY_DN55546_c0_g1_i1.path1		TRINITY_DN23809_c0_g1_i1.path2	novel.10221	TRINITY_DN15455_c0_g1_i7.path3	Pepsico2_Contig8830.path2
TRINITY_DN21686_c1_g1_i1.path1	TRINITY_DN78535_c0_g1_i1.path1	Pepsico2_Contig8115.path1	TRINITY_DN4595_c0_g3_i1.path2		Pepsico2_Contig12703.path1	TRINITY_DN37672_c0_g1_i1.path1	TRINITY_DN11047_c0_g1_i1.path1	novel.9345
novel.7604	TRINITY_DN13705_c0_g3_i1.path2	TRINITY_DN25186_c0_g1_i1.path3	TRINITY_DN90434_c0_g1_i1.path1		TRINITY_DN41265_c0_g1_i1.path1	TRINITY_DN17139_c0_g1_i1.path1	TRINITY_DN13202_c0_g1_i2.path1	novel.2734
TRINITY_DN41724_c1_g1_i4.path1	TRINITY_DN29528_c0_g1_i1.path1	TRINITY_DN38179_c0_g1_i1.path1	TRINITY_DN113066_c0_g1_i1.path1		TRINITY_DN94041_c0_g1_i1.path1	TRINITY_DN61247_c0_g1_i1.path1	TRINITY_DN42158_c0_g1_i1.path1	Pepsico2_Contig20779.path1
Pepsico1_Contig521.path1	TRINITY_DN648_c1_g1_i8.path2	TRINITY_DN27940_c0_g1_i2.path2	TRINITY_DN40695_c0_g2_i2.path1		TRINITY_DN7004_c0_g2_i1.path1	TRINITY_DN101134_c0_g1_i1.path1	TRINITY_DN14174_c0_g3_i1.path1	Pepsico2_Contig20350.path1
TRINITY_DN19182_c0_g1_i2.path2	TRINITY_DN2337_c0_g1_i6.path2	TRINITY_DN27463_c0_g1_i1.path1	novel.994		TRINITY_DN82427_c0_g1_i1.path1	TRINITY_DN17358_c1_g2_i4.path1	TRINITY_DN13000_c0_g2_i2.path1	Pepsico2_Contig2004.path2
TRINITY_DN934_c0_g1_i1.path1	novel.10337	TRINITY_DN113066_c0_g1_i1.path1	TRINITY_DN9612_c0_g1_i1.path2		TRINITY_DN35699_c0_g1_i2.path1	Pepsico2_Contig15185.path1	TRINITY_DN94140_c0_g1_i1.path2	TRINITY_DN52817_c0_g1_i1.path1
Pepsico2_Contig19788.path2	novel.6580	novel.73	TRINITY_DN68790_c0_g1_i1.path1		TRINITY_DN5789_c1_g1_i1.path1	novel.9838	novel.1320	TRINITY_DN56759_c0_g1_i4.path2
TRINITY_DN12532_c0_g1_i3.path1	TRINITY_DN19377_c0_g1_i3.path1	novel.4320	Pepsico2_Contig8516.path2		TRINITY_DN90514_c0_g1_i1.path1	Pepsico2_Contig13838.path2	TRINITY_DN23705_c0_g2_i2.path1	TRINITY_DN7335_c0_g1_i7.path1
novel.2036	Pepsico2_Contig3522.path1	novel.8660	TRINITY_DN14321_c0_g1_i1.path2		TRINITY_DN47321_c0_g2_i1.path1	novel.1441	TRINITY_DN3104_c1_g2_i1.path1	TRINITY_DN32690_c0_g2_i1.path1
novel.3361	Pepsico2_Contig7741.path2	TRINITY_DN26560_c0_g2_i1.path2	novel.8682		novel.9146	TRINITY_DN56274_c0_g1_i1.path1	novel.5375	novel.7010
TRINITY_DN10330_c0_g4_i1.path2	TRINITY_DN106523_c0_g1_i1.path1	TRINITY_DN14704_c0_g1_i1.path2	TRINITY_DN58726_c0_g1_i1.path1		TRINITY_DN26590_c0_g1_i1.path1	TRINITY_DN17398_c0_g2_i3.path1	TRINITY_DN32075_c0_g5_i3.path1	Pepsico2_Contig9507.path1
TRINITY_DN21247_c0_g1_i2.path2	Pepsico2_Contig12299.path2	TRINITY_DN32638_c0_g1_i1.path1	Pepsico1_Contig25289.path1		novel.8103	TRINITY_DN12548_c0_g1_i3.path2	TRINITY_DN14625_c0_g2_i1.path1	novel.5538
TRINITY_DN17775_c0_g2_i1.path1	Pepsico2_Contig7277.path1	TRINITY_DN249_c0_g3_i1.path1	novel.4474		novel.3381	TRINITY_DN23712_c0_g3_i1.path1	novel.10120	TRINITY_DN10301_c1_g1_i3.path1
TRINITY_DN90723_c0_g1_i1.path1	TRINITY_DN40249_c0_g1_i1.path1	Pepsico2_Contig10764.path1	TRINITY_DN8579_c0_g1_i12.path3		Pepsico2_Contig17622.path2	TRINITY_DN28234_c1_g1_i1.path1	TRINITY_DN11548_c0_g1_i5.path1	Pepsico1_Contig34820.path1
TRINITY_DN20066_c0_g2_i11.path1	Pepsico1_Contig4010.path1	novel.5777	Pepsico2_Contig12826.path1		TRINITY_DN20889_c1_g1_i1.path1	TRINITY_DN100271_c0_g1_i1.path1	Pepsico2_Contig10648.path1	TRINITY_DN37102_c0_g1_i2.path1
Pepsico1_Contig1632.path1	TRINITY_DN43227_c0_g1_i2.path1	TRINITY_DN35314_c0_g1_i3.path1	TRINITY_DN29568_c0_g1_i1.path1		novel.6581	novel.8586	novel.6264	Pepsico2_Contig14392.path1
TRINITY_DN17492_c0_g1_i1.path1	TRINITY_DN13657_c0_g1_i2.path1	Pepsico1_Contig721.path1	novel.836		TRINITY_DN7902_c1_g1_i1.path2	Pepsico2_Contig7603.path1	TRINITY_DN8122_c0_g1_i5.path1	TRINITY_DN37338_c0_g1_i3.path1
TRINITY_DN1502_c0_g4_i1.path1	novel.4236	Pepsico1_Contig2049.path2	TRINITY_DN15392_c0_g1_i1.path1		Pepsico2_Contig17149.path1	Pepsico1_Contig1029.path2	novel.2086	Pepsico2_Contig12155.path1
novel.2117	TRINITY_DN14129_c0_g1_i5.path3	TRINITY_DN5621_c0_g3_i1.path1	TRINITY_DN10178_c0_g2_i5.path1		TRINITY_DN10838_c0_g2_i1.path2	TRINITY_DN55852_c0_g1_i1.path1	novel.7228	TRINITY_DN25055_c0_g2_i1.path1
TRINITY_DN3161_c0_g1_i1.path1	TRINITY_DN33361_c0_g1_i5.path2	TRINITY_DN15198_c0_g1_i2.path1	TRINITY_DN26408_c0_g1_i1.path1		Pepsico1_Contig6629.path1	Pepsico2_Contig1718.path1	TRINITY_DN87900_c0_g1_i1.path1	TRINITY_DN66014_c0_g1_i1.path1
novel.5849	TRINITY_DN16572_c0_g1_i1.path1	Pepsico1_Contig4396.path1	TRINITY_DN7884_c0_g1_i4.path1		TRINITY_DN36981_c5_g1_i1.path1	Pepsico1_Contig3406.path1	TRINITY_DN34756_c0_g1_i5.path1	Pepsico2_Contig3832.path1
Pepsico2_Contig7659.path1	Pepsico2_Contig16099.path1	Pepsico1_Contig32360.path1	TRINITY_DN45971_c0_g1_i3.path1		TRINITY_DN59891_c1_g1_i2.path1	TRINITY_DN83901_c0_g1_i1.path1	Pepsico2_Contig18121.path1	TRINITY_DN49479_c0_g1_i1.path1
TRINITY_DN49378_c0_g1_i1.path1	TRINITY_DN25005_c0_g1_i1.path1	novel.1477	TRINITY_DN29531_c0_g1_i1.path2		TRINITY_DN15559_c0_g3_i1.path1	TRINITY_DN106898_c0_g1_i1.path1	novel.4947	Pepsico2_Contig638.path1
TRINITY_DN4288_c0_g1_i3.path1	Pepsico2_Contig748.path1	TRINITY_DN15916_c0_g1_i1.path1	Pepsico1_Contig6100.path1		TRINITY_DN17914_c0_g1_i9.path1	TRINITY_DN21247_c0_g1_i2.path1	TRINITY_DN26262_c0_g1_i1.path1	TRINITY_DN20133_c0_g1_i3.path1
Pepsico2_Contig2980.path1	TRINITY_DN2947_c0_g1_i2.path3	TRINITY_DN34348_c0_g2_i1.path2	TRINITY_DN37380_c0_g3_i1.path1		TRINITY_DN18140_c0_g1_i1.path1	TRINITY_DN29954_c0_g1_i1.path1	TRINITY_DN11470_c0_g1_i1.path1	Pepsico2_Contig3586.path2
TRINITY_DN72996_c0_g1_i1.path1	TRINITY_DN18117_c0_g1_i3.path3	TRINITY_DN11687_c0_g1_i1.path1	novel.2831		TRINITY_DN27567_c0_g1_i1.path1	TRINITY_DN33625_c0_g1_i1.path1	Pepsico2_Contig1496.path1	novel.2581
Pepsico2_Contig12133.path2	Pepsico2_Contig3659.path1	TRINITY_DN43861_c0_g1_i2.path1	TRINITY_DN9201_c0_g1_i1.path1		TRINITY_DN12603_c0_g1_i2.path1	novel.1640	novel.1076	novel.9321
TRINITY_DN14475_c0_g2_i3.path1	novel.3694	TRINITY_DN976_c0_g1_i2.path2	TRINITY_DN4484_c1_g1_i2.path1		novel.3551	TRINITY_DN83476_c0_g1_i1.path1	novel.5601	TRINITY_DN60125_c0_g1_i1.path1
TRINITY_DN8381_c0_g1_i1.path1	Pepsico1_Contig3978.path1	Pepsico2_Contig15659.path1	Pepsico2_Contig17684.path1		Pepsico2_Contig7517.path1	TRINITY_DN106494_c0_g1_i1.path1	TRINITY_DN12836_c0_g1_i3.path1	novel.5704
Pepsico2_Contig648.path1	TRINITY_DN4852_c0_g2_i2.path1	Pepsico2_Contig20029.path1	Pepsico1_Contig1245.path1		TRINITY_DN5709_c0_g2_i2.path1	TRINITY_DN23428_c0_g1_i1.path1	Pepsico2_Contig12375.path1	TRINITY_DN22733_c1_g1_i3.path1
Pepsico2_Contig17684.path1	TRINITY_DN51062_c0_g1_i1.path1	novel.10304	TRINITY_DN11345_c0_g1_i3.path2		Pepsico1_Contig1873.path2	novel.2011	Pepsico2_Contig7514.path1	Pepsico1_Contig6100.path1
TRINITY_DN29095_c0_g1_i2.path1	TRINITY_DN37508_c0_g2_i1.path1	TRINITY_DN79890_c0_g1_i1.path1	TRINITY_DN25922_c0_g1_i1.path1		Pepsico2_Contig6727.path1	TRINITY_DN6365_c0_g1_i3.path1	TRINITY_DN4714_c0_g1_i9.path1	TRINITY_DN14061_c0_g3_i2.path1
TRINITY_DN64115_c0_g1_i2.path1	TRINITY_DN6454_c0_g2_i1.path2	TRINITY_DN6551_c0_g4_i2.path1	TRINITY_DN42759_c0_g1_i4.path3		novel.3524	novel.2296	TRINITY_DN53857_c0_g1_i1.path1	TRINITY_DN20769_c0_g1_i1.path1
novel.1338	TRINITY_DN3065_c0_g1_i2.path1	TRINITY_DN8929_c0_g1_i2.path1	Pepsico2_Contig9913.path1		Pepsico1_Contig7397.path2	TRINITY_DN28019_c0_g1_i9.path1	TRINITY_DN18292_c0_g3_i1.path1	TRINITY_DN2720_c0_g1_i2.path1
TRINITY_DN18579_c0_g1_i1.path1	TRINITY_DN57133_c0_g1_i1.path1	novel.2184	TRINITY_DN18524_c0_g1_i1.path1		novel.8678	TRINITY_DN1454_c0_g1_i1.path1	TRINITY_DN102485_c0_g1_i1.path1	TRINITY_DN3106_c0_g2_i1.path1
TRINITY_DN5401_c0_g1_i7.path1	TRINITY_DN85794_c0_g1_i1.path1	TRINITY_DN5286_c0_g1_i2.path1	novel.5006		TRINITY_DN19935_c0_g1_i10.path1	Pepsico2_Contig4717.path1	Pepsico2_Contig7984.path2	Pepsico2_Contig3519.path1
TRINITY_DN27219_c0_g1_i7.path1	TRINITY_DN3369_c0_g1_i2.path2	TRINITY_DN18747_c0_g1_i10.path1	TRINITY_DN17729_c0_g1_i1.path1		novel.6380	TRINITY_DN15916_c0_g1_i1.path1	Pepsico2_Contig20155.path1	Pepsico2_Contig20349.path1
TRINITY_DN648_c1_g1_i8.path1	TRINITY_DN102445_c0_g1_i1.path1	TRINITY_DN8830_c0_g1_i19.path3	TRINITY_DN22987_c0_g1_i1.path1		TRINITY_DN12423_c0_g2_i1.path1	Pepsico2_Contig17000.path1	TRINITY_DN29949_c4_g1_i1.path1	Pepsico2_Contig7109.path1
novel.1817	TRINITY_DN32977_c0_g2_i1.path1	TRINITY_DN10826_c0_g1_i2.path1	TRINITY_DN42400_c4_g1_i1.path1		TRINITY_DN4514_c1_g1_i3.path1	TRINITY_DN69283_c0_g1_i1.path1	novel.9093	Pepsico2_Contig1496.path1
TRINITY_DN7464_c0_g1_i4.path1	novel.2274	TRINITY_DN25998_c0_g1_i2.path2	novel.8801		TRINITY_DN20003_c0_g1_i1.path1	Pepsico2_Contig20384.path1	TRINITY_DN40757_c0_g1_i2.path1	TRINITY_DN4576_c0_g1_i2.path1
TRINITY_DN47812_c0_g1_i2.path1	TRINITY_DN85435_c0_g1_i1.path1	novel.4727	TRINITY_DN12_c0_g1_i1.path2		TRINITY_DN23091_c0_g1_i1.path1	TRINITY_DN1139_c0_g1_i1.path1	TRINITY_DN18692_c2_g1_i1.path1	TRINITY_DN49793_c0_g1_i6.path1
Pepsico2_Contig17203.path1	TRINITY_DN13166_c1_g1_i1.path1	novel.4846	TRINITY_DN22897_c0_g1_i1.path1		TRINITY_DN75873_c0_g1_i1.path2	TRINITY_DN37508_c0_g1_i2.path1	novel.5499	TRINITY_DN9291_c0_g1_i1.path1
TRINITY_DN11785_c1_g1_i1.path1	TRINITY_DN11817_c0_g1_i1.path1	TRINITY_DN693_c1_g1_i1.path1	TRINITY_DN58083_c0_g1_i1.path1		Pepsico2_Contig14991.path2	TRINITY_DN43775_c0_g1_i1.path2	TRINITY_DN52988_c0_g1_i1.path1	TRINITY_DN22145_c0_g1_i2.path1
TRINITY_DN39737_c0_g1_i1.path1	Pepsico2_Contig17795.path1	TRINITY_DN16298_c0_g2_i1.path1	novel.8077		Pepsico2_Contig9636.path1	TRINITY_DN94904_c0_g1_i1.path1	novel.2360	TRINITY_DN16543_c0_g2_i1.path1
TRINITY_DN24342_c0_g2_i1.path1	novel.1477	novel.2124	TRINITY_DN112088_c0_g1_i1.path1		novel.4101	TRINITY_DN10806_c0_g1_i1.path2	TRINITY_DN61247_c0_g1_i1.path1	novel.9365
TRINITY_DN29142_c0_g1_i1.path2	TRINITY_DN32968_c0_g1_i1.path1	TRINITY_DN23077_c0_g2_i1.path2	TRINITY_DN1459_c0_g2_i3.path1		TRINITY_DN20414_c0_g2_i1.path1	Pepsico2_Contig13090.path1	TRINITY_DN26083_c0_g1_i3.path1	TRINITY_DN15112_c0_g2_i1.path1
TRINITY_DN23121_c0_g2_i1.path2	Pepsico2_Contig18257.path1	novel.8077	Pepsico2_Contig7676.path1		TRINITY_DN44035_c0_g1_i2.path1	TRINITY_DN16376_c0_g1_i2.path1	TRINITY_DN320_c2_g1_i1.path2	TRINITY_DN14103_c0_g1_i5.path1
novel.874	Pepsico1_Contig5519.path2	Pepsico2_Contig19497.path1	Pepsico2_Contig6897.path1		TRINITY_DN21464_c0_g1_i3.path2	TRINITY_DN16002_c0_g1_i1.path1	TRINITY_DN582_c2_g1_i6.path3	Pepsico1_Contig26406.path1
novel.7057	TRINITY_DN97339_c0_g1_i1.path1	TRINITY_DN39153_c0_g1_i1.path1	novel.3640		TRINITY_DN34093_c0_g1_i1.path1	TRINITY_DN15500_c0_g3_i1.path2	Pepsico2_Contig20608.path1	TRINITY_DN80123_c0_g1_i1.path1
TRINITY_DN40976_c0_g1_i1.path1	Pepsico2_Contig3845.path1	TRINITY_DN28946_c0_g1_i2.path1	TRINITY_DN9896_c0_g1_i7.path1		Pepsico2_Contig12237.path1	novel.3595	novel.7371	TRINITY_DN15718_c0_g1_i3.path1
TRINITY_DN18893_c0_g1_i1.path1	Pepsico1_Contig3978.path2	TRINITY_DN20672_c0_g1_i1.path3	TRINITY_DN9154_c0_g1_i6.path1		TRINITY_DN61247_c0_g1_i1.path1	TRINITY_DN1120_c0_g2_i4.path1	novel.6897	TRINITY_DN4207_c0_g1_i1.path1
Pepsico2_Contig13244.path2	TRINITY_DN11511_c0_g3_i2.path1	Pepsico2_Contig5536.path1	TRINITY_DN48958_c0_g1_i2.path1		Pepsico2_Contig13301.path1	TRINITY_DN58060_c0_g1_i1.path1	TRINITY_DN89378_c0_g1_i1.path1	novel.5070
Pepsico2_Contig5996.path2	novel.4975	Pepsico2_Contig2980.path1	Pepsico2_Contig3454.path1		TRINITY_DN8085_c0_g1_i1.path1	novel.1495	Pepsico2_Contig660.path1	TRINITY_DN22587_c0_g1_i1.path1
TRINITY_DN15949_c0_g1_i1.path1	TRINITY_DN16373_c0_g2_i1.path1	novel.2291	novel.7557		novel.3245	TRINITY_DN39236_c0_g1_i1.path1	TRINITY_DN1059_c0_g1_i4.path1	novel.2564
TRINITY_DN34195_c0_g1_i2.path2	TRINITY_DN16421_c0_g1_i9.path3	Pepsico2_Contig13425.path1	TRINITY_DN16433_c0_g1_i7.path1		TRINITY_DN10188_c0_g1_i2.path1	TRINITY_DN18117_c0_g1_i3.path3	novel.9142	Pepsico2_Contig14213.path1
novel.8077	TRINITY_DN33471_c0_g1_i1.path1	Pepsico1_Contig6612.path2	Pepsico1_Contig4345.path1		TRINITY_DN1099_c0_g1_i1.path1	TRINITY_DN11920_c0_g1_i2.path1	TRINITY_DN6293_c0_g1_i1.path1	TRINITY_DN27290_c0_g1_i1.path1
novel.1849	TRINITY_DN87_c0_g1_i1.path2	novel.9823	novel.1993		TRINITY_DN40412_c0_g3_i1.path1	Pepsico1_Contig47.path2	novel.1927	TRINITY_DN69362_c0_g1_i1.path1
novel.1731	novel.6980	TRINITY_DN11450_c3_g1_i1.path1	TRINITY_DN38137_c0_g1_i1.path1		TRINITY_DN31553_c1_g1_i1.path1	novel.6923	Pepsico2_Contig2625.path1	TRINITY_DN4474_c1_g2_i1.path1
TRINITY_DN11817_c0_g1_i1.path1	Pepsico2_Contig10317.path1	novel.4114	TRINITY_DN69304_c0_g1_i1.path1		TRINITY_DN25934_c0_g1_i5.path1	TRINITY_DN7411_c0_g1_i2.path1	TRINITY_DN40297_c1_g1_i1.path1	TRINITY_DN16943_c0_g2_i2.path1
TRINITY_DN15884_c0_g2_i4.path2	Pepsico2_Contig4732.path1	TRINITY_DN50089_c0_g1_i4.path1	TRINITY_DN35_c0_g2_i1.path1		TRINITY_DN15549_c0_g1_i7.path2	TRINITY_DN7872_c0_g4_i1.path1	novel.4061	novel.7047
TRINITY_DN22992_c0_g1_i1.path1	TRINITY_DN109533_c0_g1_i1.path1	TRINITY_DN88385_c0_g1_i1.path1	novel.6171		TRINITY_DN899_c0_g1_i5.path2	novel.3233	TRINITY_DN36977_c1_g1_i1.path1	novel.5640
TRINITY_DN28038_c0_g1_i1.path1	TRINITY_DN16585_c0_g1_i1.path1	novel.2141	TRINITY_DN5816_c0_g1_i8.path1		TRINITY_DN9524_c0_g1_i11.path1	Pepsico2_Contig3476.path1	TRINITY_DN22584_c1_g1_i1.path1	novel.2683
Pepsico2_Contig13244.path1	TRINITY_DN64057_c0_g1_i1.path1	TRINITY_DN18448_c0_g1_i2.path3	TRINITY_DN12929_c0_g2_i1.path1		TRINITY_DN29525_c0_g1_i5.path1	TRINITY_DN34855_c0_g1_i14.path2	novel.10153	TRINITY_DN65352_c0_g1_i1.path1
TRINITY_DN13022_c0_g1_i1.path1	TRINITY_DN310_c1_g1_i3.path1	TRINITY_DN88881_c0_g1_i1.path1	TRINITY_DN26162_c0_g1_i1.path1		TRINITY_DN40654_c2_g2_i1.path2	novel.1745	Pepsico2_Contig12764.path1	TRINITY_DN21323_c1_g2_i1.path1
TRINITY_DN22478_c0_g1_i1.path1	Pepsico2_Contig752.path1	TRINITY_DN13705_c0_g4_i1.path1	TRINITY_DN26560_c0_g3_i2.path1		TRINITY_DN25242_c0_g1_i2.path1	TRINITY_DN158_c0_g1_i1.path1	novel.8181	TRINITY_DN11063_c0_g1_i1.path1
TRINITY_DN224_c0_g1_i3.path1	novel.6930	TRINITY_DN13237_c0_g1_i10.path1	novel.1974		Pepsico1_Contig2592.path1	TRINITY_DN26039_c0_g1_i1.path1	TRINITY_DN69283_c0_g1_i1.path1	novel.1498
TRINITY_DN12913_c0_g1_i2.path3	TRINITY_DN7472_c0_g1_i1.path1	Pepsico2_Contig17730.path1	TRINITY_DN36881_c0_g3_i1.path1		TRINITY_DN3212_c0_g1_i1.path1	novel.7680	TRINITY_DN976_c0_g1_i2.path2	TRINITY_DN1583_c0_g1_i1.path1
TRINITY_DN15272_c0_g2_i1.path1	novel.4542	Pepsico1_Contig31861.path1	novel.10217		TRINITY_DN28639_c0_g3_i1.path1	Pepsico2_Contig3537.path2	TRINITY_DN30268_c0_g3_i2.path1	TRINITY_DN43775_c1_g3_i1.path2
TRINITY_DN23391_c0_g1_i1.path1	TRINITY_DN16713_c0_g1_i1.path1	TRINITY_DN12758_c1_g2_i1.path1	novel.7472		TRINITY_DN13961_c0_g1_i21.path3	Pepsico2_Contig5219.path1	Pepsico2_Contig4663.path1	TRINITY_DN107396_c0_g1_i1.path1
TRINITY_DN20097_c0_g1_i1.path1	Pepsico2_Contig1900.path3	TRINITY_DN33471_c0_g1_i1.path1	Pepsico2_Contig4423.path1		novel.3630	TRINITY_DN9209_c0_g1_i7.path1	novel.3013	TRINITY_DN36862_c0_g1_i1.path3
Pepsico2_Contig6097.path1	TRINITY_DN9210_c0_g3_i1.path1	TRINITY_DN40817_c0_g1_i1.path1	Pepsico2_Contig19467.path2		TRINITY_DN79157_c0_g1_i1.path1	Pepsico2_Contig12882.path1	TRINITY_DN99656_c0_g1_i1.path1	TRINITY_DN44824_c0_g1_i1.path5
TRINITY_DN73261_c0_g1_i1.path1	TRINITY_DN11478_c0_g2_i8.path1	TRINITY_DN22897_c0_g1_i1.path1	TRINITY_DN21236_c1_g1_i1.path1		TRINITY_DN46283_c0_g1_i1.path1	novel.1301	novel.5555	TRINITY_DN13202_c0_g1_i2.path1
TRINITY_DN94920_c0_g1_i1.path1	TRINITY_DN8830_c0_g1_i19.path3	Pepsico1_Contig8171.path1	TRINITY_DN5942_c1_g1_i4.path1		novel.5684	TRINITY_DN6057_c0_g1_i2.path1	TRINITY_DN15885_c0_g1_i1.path1	novel.2173
Pepsico2_Contig10317.path1	TRINITY_DN6633_c0_g1_i5.path1	novel.5188	TRINITY_DN8445_c0_g1_i4.path1		TRINITY_DN10656_c0_g3_i1.path2	TRINITY_DN8969_c0_g1_i5.path2	TRINITY_DN8939_c0_g1_i1.path1	TRINITY_DN88881_c0_g1_i1.path1
novel.1560	novel.10001	TRINITY_DN4502_c0_g2_i1.path1	TRINITY_DN4830_c0_g3_i1.path1		TRINITY_DN12051_c0_g1_i1.path2	TRINITY_DN42509_c0_g1_i1.path1	TRINITY_DN82468_c0_g1_i1.path1	TRINITY_DN18095_c0_g1_i1.path1
TRINITY_DN4885_c0_g3_i1.path1	Pepsico2_Contig12802.path1	TRINITY_DN4477_c0_g1_i1.path1	Pepsico2_Contig19828.path1		novel.9461	TRINITY_DN21191_c0_g1_i1.path1	TRINITY_DN12913_c0_g1_i2.path1	novel.1614
TRINITY_DN8555_c0_g1_i8.path1	Pepsico2_Contig19227.path1	TRINITY_DN8555_c0_g1_i8.path1	Pepsico2_Contig5893.path1		novel.1838	Pepsico1_Contig7174.path1	novel.1363	novel.6264
novel.5329	TRINITY_DN11150_c0_g1_i1.path1	novel.6293	TRINITY_DN27940_c0_g1_i2.path2		novel.5871	novel.675	TRINITY_DN43686_c0_g1_i1.path1	TRINITY_DN6551_c0_g4_i2.path1
TRINITY_DN20722_c0_g1_i1.path1	TRINITY_DN13050_c0_g1_i9.path1	TRINITY_DN9385_c2_g2_i1.path1	TRINITY_DN25186_c0_g1_i1.path1		TRINITY_DN9457_c0_g1_i5.path1	TRINITY_DN16929_c1_g1_i4.path1	TRINITY_DN106494_c0_g1_i1.path1	TRINITY_DN22934_c1_g3_i2.path1
novel.7329	TRINITY_DN15616_c0_g1_i5.path3	Pepsico1_Contig36864.path1	TRINITY_DN12947_c0_g1_i4.path1		Pepsico2_Contig16931.path1	TRINITY_DN31731_c0_g1_i2.path1	TRINITY_DN21405_c1_g1_i7.path1	TRINITY_DN33305_c0_g3_i1.path1
TRINITY_DN19856_c0_g1_i3.path1	Pepsico2_Contig638.path1	novel.7729	TRINITY_DN25384_c0_g1_i1.path2		TRINITY_DN26093_c0_g1_i2.path1	novel.8819	TRINITY_DN14050_c0_g1_i4.path1	TRINITY_DN24943_c0_g1_i1.path1
Pepsico2_Contig187.path2	TRINITY_DN40344_c0_g1_i1.path1	TRINITY_DN19219_c0_g1_i1.path1	Pepsico2_Contig17537.path1		TRINITY_DN69429_c0_g1_i1.path1	TRINITY_DN7443_c0_g2_i1.path1	TRINITY_DN6633_c0_g1_i5.path1	novel.4975
TRINITY_DN51761_c3_g2_i3.path1	TRINITY_DN1928_c0_g1_i7.path1	Pepsico1_Contig36864.path2	TRINITY_DN29531_c0_g1_i1.path1		TRINITY_DN29531_c0_g1_i1.path1	TRINITY_DN10241_c1_g3_i1.path1	TRINITY_DN1580_c0_g1_i4.path2	Pepsico2_Contig12692.path4
Pepsico2_Contig8781.path1	TRINITY_DN8555_c0_g1_i8.path1	TRINITY_DN25186_c0_g1_i1.path1	TRINITY_DN55504_c0_g1_i1.path1		Pepsico1_Contig26.path1	Pepsico2_Contig8571.path1	Pepsico2_Contig17571.path2	Pepsico2_Contig2197.path2
Pepsico2_Contig6250.path1	Pepsico2_Contig20580.path1	TRINITY_DN25998_c0_g1_i2.path1	TRINITY_DN40729_c0_g1_i1.path1		novel.4908	Pepsico2_Contig12768.path1	TRINITY_DN14238_c1_g1_i1.path1	TRINITY_DN25287_c0_g2_i1.path1
TRINITY_DN18692_c2_g1_i1.path1	TRINITY_DN51934_c0_g1_i1.path1	TRINITY_DN12498_c0_g1_i2.path1	novel.9764		TRINITY_DN14314_c0_g2_i2.path1	Pepsico2_Contig3801.path1	Pepsico2_Contig14670.path2	TRINITY_DN55546_c0_g1_i1.path1
TRINITY_DN18161_c0_g1_i10.path1	Pepsico2_Contig6644.path1	novel.1498	TRINITY_DN18829_c1_g1_i1.path3		TRINITY_DN20062_c0_g1_i1.path1	novel.9216	TRINITY_DN6454_c0_g2_i1.path2	novel.4908
TRINITY_DN35789_c0_g1_i1.path2	TRINITY_DN37181_c0_g1_i1.path2	TRINITY_DN16151_c0_g5_i1.path1	TRINITY_DN52884_c0_g1_i1.path1		TRINITY_DN11741_c1_g1_i2.path1	TRINITY_DN88673_c0_g1_i1.path1	TRINITY_DN35162_c0_g1_i2.path1	novel.4819
TRINITY_DN11586_c0_g2_i3.path1	TRINITY_DN33442_c0_g2_i3.path1	TRINITY_DN90340_c0_g1_i1.path1	TRINITY_DN13072_c1_g1_i2.path1		TRINITY_DN26105_c0_g1_i10.path2	Pepsico2_Contig19604.path1	novel.4253	TRINITY_DN2377_c0_g1_i1.path2
TRINITY_DN100540_c0_g1_i1.path1	TRINITY_DN21405_c1_g1_i7.path1	novel.4532	TRINITY_DN10981_c1_g1_i2.path1		TRINITY_DN18592_c0_g1_i1.path1	TRINITY_DN72136_c0_g1_i1.path1	TRINITY_DN253_c0_g2_i12.path1	TRINITY_DN6025_c0_g1_i12.path1
novel.4238	TRINITY_DN38578_c0_g4_i1.path2	TRINITY_DN53070_c0_g1_i1.path2	novel.6249		TRINITY_DN34212_c0_g2_i3.path1	TRINITY_DN26200_c0_g1_i1.path1	TRINITY_DN11282_c2_g1_i1.path1	Pepsico2_Contig17047.path1
novel.5258	TRINITY_DN41418_c0_g2_i1.path1	TRINITY_DN9210_c0_g3_i1.path1	Pepsico1_Contig332.path2		TRINITY_DN35659_c0_g1_i3.path2	TRINITY_DN23713_c0_g1_i1.path1	Pepsico2_Contig7109.path1	TRINITY_DN36881_c0_g3_i1.path1
Pepsico2_Contig3659.path1	Pepsico1_Contig35904.path3	novel.3405	TRINITY_DN26976_c0_g1_i3.path1		TRINITY_DN43761_c0_g1_i1.path1	TRINITY_DN101212_c0_g1_i1.path1	TRINITY_DN55600_c0_g1_i1.path1	TRINITY_DN2864_c0_g1_i5.path1
Pepsico1_Contig6612.path2	TRINITY_DN43861_c0_g1_i2.path1	TRINITY_DN55872_c0_g1_i1.path1	TRINITY_DN4835_c0_g2_i1.path2		novel.8167	novel.4474	novel.9814	novel.7506
TRINITY_DN25384_c0_g1_i1.path1	TRINITY_DN82040_c0_g1_i1.path1	novel.7660	Pepsico1_Contig1467.path1		TRINITY_DN64057_c0_g1_i1.path1	TRINITY_DN68934_c0_g1_i1.path1	TRINITY_DN98099_c0_g1_i1.path1	TRINITY_DN11406_c0_g1_i1.path1
Pepsico1_Contig47.path2	TRINITY_DN36977_c1_g1_i1.path1	TRINITY_DN24179_c1_g1_i1.path1	novel.7067		Pepsico1_Contig3469.path2	TRINITY_DN29095_c0_g2_i1.path1	Pepsico1_Contig501.path1	TRINITY_DN8794_c0_g2_i3.path2
Pepsico2_Contig9443.path1	Pepsico2_Contig7869.path1	TRINITY_DN8579_c0_g1_i12.path3	TRINITY_DN92652_c0_g1_i1.path1		Pepsico2_Contig11747.path1	Pepsico2_Contig15237.path1	TRINITY_DN88673_c0_g1_i1.path1	Pepsico2_Contig12177.path2
novel.8750	TRINITY_DN29809_c0_g2_i2.path1	TRINITY_DN20722_c0_g1_i1.path1	Pepsico2_Contig14508.path2		TRINITY_DN22397_c1_g1_i1.path1	TRINITY_DN31417_c0_g2_i1.path1	Pepsico2_Contig8620.path1	TRINITY_DN59891_c1_g1_i2.path1
TRINITY_DN78422_c0_g1_i2.path1	Pepsico2_Contig20745.path1	Pepsico1_Contig16088.path2	TRINITY_DN43919_c0_g1_i1.path1		Pepsico2_Contig19763.path1	TRINITY_DN4474_c1_g1_i3.path2	TRINITY_DN9886_c0_g1_i1.path1	TRINITY_DN16303_c0_g1_i4.path1
TRINITY_DN9156_c0_g3_i1.path1	novel.5499	novel.9302	TRINITY_DN16826_c0_g1_i2.path1		TRINITY_DN18686_c0_g2_i10.path1	TRINITY_DN13609_c0_g1_i3.path1	novel.7184	Pepsico2_Contig7605.path1
TRINITY_DN23496_c0_g1_i2.path2	TRINITY_DN9896_c0_g1_i7.path1	TRINITY_DN76691_c0_g1_i1.path1	TRINITY_DN8171_c0_g1_i3.path1		TRINITY_DN57484_c0_g1_i1.path1	Pepsico2_Contig930.path1	novel.5248	TRINITY_DN22203_c1_g1_i2.path1
TRINITY_DN76418_c0_g1_i1.path2	Pepsico2_Contig20350.path1	novel.986	TRINITY_DN44751_c0_g1_i1.path1		TRINITY_DN44444_c0_g1_i1.path1	TRINITY_DN2518_c0_g1_i3.path1	novel.503	TRINITY_DN38122_c0_g1_i1.path1
novel.4114	TRINITY_DN14278_c0_g1_i1.path1	Pepsico1_Contig395.path1	novel.5082		Pepsico2_Contig5727.path1	Pepsico2_Contig14330.path1	TRINITY_DN59933_c0_g1_i1.path1	TRINITY_DN26979_c0_g4_i2.path1
TRINITY_DN9693_c0_g1_i7.path1	Pepsico2_Contig14707.path1	TRINITY_DN30069_c0_g2_i1.path1	TRINITY_DN8830_c0_g1_i19.path3		novel.2011	TRINITY_DN90964_c0_g1_i1.path1	Pepsico2_Contig19106.path1	novel.5699
novel.5207	Pepsico2_Contig6534.path1	Pepsico1_Contig672.path2	TRINITY_DN20131_c0_g1_i4.path1		novel.3672	TRINITY_DN79340_c0_g1_i1.path1	Pepsico2_Contig17047.path1	novel.9761
novel.1546	novel.9142	TRINITY_DN13826_c0_g1_i3.path1	TRINITY_DN3664_c0_g3_i1.path2		TRINITY_DN63391_c0_g1_i1.path1	TRINITY_DN21556_c0_g1_i1.path2	TRINITY_DN107608_c0_g1_i1.path1	novel.7887
TRINITY_DN17359_c0_g3_i1.path1	TRINITY_DN19447_c0_g1_i1.path2	TRINITY_DN102365_c0_g1_i1.path1	novel.7080		TRINITY_DN14061_c0_g2_i1.path1	novel.6364	TRINITY_DN10241_c1_g3_i1.path1	TRINITY_DN9030_c0_g4_i1.path1
novel.7855	TRINITY_DN42158_c0_g1_i1.path1	novel.6575	novel.3639		Pepsico2_Contig19525.path2	novel.9200	TRINITY_DN5180_c0_g2_i3.path1	Pepsico2_Contig12308.path2
Pepsico1_Contig3978.path1	TRINITY_DN21045_c1_g1_i2.path1	TRINITY_DN581_c4_g1_i3.path1	Pepsico1_Contig1632.path2		TRINITY_DN15612_c0_g1_i10.path2	Pepsico2_Contig12703.path1	TRINITY_DN17801_c0_g1_i4.path1	TRINITY_DN62134_c2_g1_i1.path2
TRINITY_DN29582_c0_g6_i1.path2	TRINITY_DN10738_c0_g2_i1.path2	TRINITY_DN32159_c0_g1_i1.path1	Pepsico2_Contig4586.path1		TRINITY_DN25530_c0_g1_i1.path1	novel.10450	TRINITY_DN106906_c0_g1_i1.path1	TRINITY_DN87534_c0_g1_i1.path1
novel.3041	Pepsico2_Contig8440.path1	Pepsico2_Contig7452.path1	novel.8727		novel.4690	Pepsico2_Contig4681.path1	TRINITY_DN8456_c1_g1_i1.path1	Pepsico2_Contig3832.path2
TRINITY_DN98299_c0_g1_i1.path1	TRINITY_DN11063_c0_g1_i1.path1	Pepsico2_Contig17682.path1	TRINITY_DN18004_c0_g1_i1.path1		TRINITY_DN18773_c0_g1_i2.path1	Pepsico2_Contig20515.path1	TRINITY_DN16702_c0_g1_i1.path1	TRINITY_DN8360_c1_g1_i1.path2
TRINITY_DN11357_c0_g1_i1.path1	Pepsico2_Contig3010.path1	TRINITY_DN101247_c0_g1_i1.path2	TRINITY_DN93760_c0_g1_i1.path1		Pepsico2_Contig15480.path1	Pepsico2_Contig2528.path1	Pepsico1_Contig2378.path1	novel.9838
TRINITY_DN50866_c0_g1_i2.path1	TRINITY_DN21253_c0_g5_i1.path1	Pepsico2_Contig8389.path2	novel.5374		TRINITY_DN19649_c1_g2_i1.path1	TRINITY_DN58650_c0_g1_i1.path1	Pepsico1_Contig2378.path2	Pepsico2_Contig1781.path1
novel.1495	TRINITY_DN22733_c1_g1_i3.path1	Pepsico2_Contig20155.path1	novel.8514		TRINITY_DN13302_c1_g1_i1.path1	TRINITY_DN14268_c0_g1_i3.path1	TRINITY_DN106725_c0_g1_i1.path1	novel.3473
novel.7680	TRINITY_DN20010_c1_g3_i1.path1	TRINITY_DN4852_c0_g2_i2.path1	TRINITY_DN30818_c0_g1_i1.path1		Pepsico2_Contig20182.path1	novel.3089	TRINITY_DN109579_c0_g1_i1.path1	TRINITY_DN13350_c0_g1_i1.path1
Pepsico2_Contig4681.path1	novel.8822	novel.7080	novel.8810		novel.8042	TRINITY_DN24672_c0_g1_i3.path1	TRINITY_DN2852_c0_g1_i3.path2	TRINITY_DN16228_c0_g1_i5.path1
TRINITY_DN34330_c0_g1_i5.path2	Pepsico2_Contig20128.path1	TRINITY_DN21184_c0_g2_i1.path1	TRINITY_DN26045_c0_g1_i4.path1		Pepsico1_Contig2765.path1	TRINITY_DN3062_c2_g1_i2.path1	novel.5037	TRINITY_DN16362_c0_g1_i1.path1
novel.4908	novel.7891	TRINITY_DN40225_c0_g1_i1.path2	novel.9053		novel.1564	Pepsico2_Contig8726.path1	Pepsico2_Contig19649.path3	novel.2086
TRINITY_DN29233_c0_g1_i2.path1	novel.2423	TRINITY_DN11509_c0_g1_i7.path1	novel.4011		Pepsico2_Contig6041.path1	TRINITY_DN90109_c0_g1_i1.path1	Pepsico2_Contig12177.path1	TRINITY_DN94140_c0_g1_i1.path1
Pepsico2_Contig18121.path1	TRINITY_DN10302_c0_g1_i5.path1	TRINITY_DN21572_c0_g1_i1.path2	TRINITY_DN12032_c0_g1_i1.path1		Pepsico1_Contig1934.path2	TRINITY_DN87888_c0_g1_i1.path1	Pepsico2_Contig344.path2	TRINITY_DN16045_c1_g1_i4.path2
Pepsico2_Contig9556.path1	Pepsico2_Contig6405.path1	Pepsico2_Contig9996.path1	TRINITY_DN25005_c0_g1_i1.path1		novel.1011	novel.5930	TRINITY_DN1599_c1_g1_i3.path1	TRINITY_DN75666_c0_g1_i1.path1
TRINITY_DN4879_c0_g2_i1.path1	TRINITY_DN49378_c0_g1_i1.path1	Pepsico2_Contig16985.path1	TRINITY_DN25758_c0_g1_i2.path1		TRINITY_DN25375_c0_g1_i2.path1	TRINITY_DN50781_c0_g1_i1.path1	TRINITY_DN72765_c0_g1_i1.path1	TRINITY_DN8555_c0_g1_i8.path1
TRINITY_DN8751_c0_g1_i3.path1	Pepsico2_Contig16982.path2	Pepsico2_Contig19467.path2	TRINITY_DN2210_c0_g1_i2.path1		Pepsico1_Contig601.path1	TRINITY_DN72382_c0_g1_i1.path1	TRINITY_DN103644_c0_g1_i1.path1	Pepsico1_Contig4345.path1
Pepsico2_Contig2300.path1	Pepsico2_Contig12695.path1	TRINITY_DN41312_c0_g1_i1.path1	TRINITY_DN16283_c0_g2_i1.path1		TRINITY_DN54627_c0_g1_i1.path1	TRINITY_DN1583_c0_g1_i1.path1	TRINITY_DN25287_c0_g3_i1.path1	novel.7102
TRINITY_DN11150_c0_g1_i1.path1	novel.1942	Pepsico1_Contig3025.path1	TRINITY_DN25055_c0_g1_i1.path1		TRINITY_DN19409_c0_g1_i1.path1	TRINITY_DN66014_c0_g1_i1.path1	TRINITY_DN9568_c0_g1_i5.path1	TRINITY_DN67471_c0_g1_i1.path1
TRINITY_DN32250_c0_g1_i1.path1	TRINITY_DN19306_c0_g1_i4.path1	TRINITY_DN1834_c0_g1_i6.path3	TRINITY_DN6025_c0_g1_i12.path1		novel.5065	TRINITY_DN70220_c0_g1_i1.path1	TRINITY_DN26611_c0_g2_i1.path1	TRINITY_DN36053_c0_g1_i1.path1
TRINITY_DN65444_c0_g1_i1.path1	TRINITY_DN108802_c0_g1_i1.path1	Pepsico1_Contig3978.path1	Pepsico1_Contig196.path1		novel.7402	TRINITY_DN10547_c0_g1_i17.path1	novel.8529	TRINITY_DN13635_c0_g1_i6.path2
novel.10217	TRINITY_DN31787_c0_g1_i2.path2	Pepsico2_Contig8440.path1	TRINITY_DN32603_c0_g1_i1.path1		TRINITY_DN29507_c0_g1_i2.path1	TRINITY_DN16411_c0_g1_i5.path1	TRINITY_DN17492_c0_g1_i1.path1	Pepsico2_Contig16992.path1
novel.5220	TRINITY_DN37380_c0_g3_i1.path1	TRINITY_DN69448_c0_g1_i1.path1	TRINITY_DN88385_c0_g1_i1.path1		TRINITY_DN14549_c0_g1_i5.path1	TRINITY_DN48186_c0_g1_i1.path1	TRINITY_DN9779_c1_g1_i1.path1	TRINITY_DN32977_c0_g2_i1.path1
Pepsico2_Contig7839.path1	TRINITY_DN28145_c0_g2_i3.path1	TRINITY_DN91483_c0_g1_i1.path1	TRINITY_DN1693_c0_g1_i12.path2		TRINITY_DN27712_c0_g1_i1.path1	TRINITY_DN18478_c0_g1_i1.path1	TRINITY_DN10194_c2_g1_i1.path1	Pepsico2_Contig660.path1
Pepsico2_Contig16777.path1	TRINITY_DN15249_c0_g1_i5.path1	Pepsico2_Contig3454.path1	TRINITY_DN21405_c1_g1_i7.path1		Pepsico2_Contig19570.path1	TRINITY_DN2567_c0_g1_i1.path3	TRINITY_DN6583_c0_g5_i1.path1	TRINITY_DN1599_c1_g1_i3.path1
TRINITY_DN20707_c1_g2_i1.path1	TRINITY_DN16330_c0_g1_i2.path2	TRINITY_DN26262_c0_g1_i1.path1	TRINITY_DN11017_c0_g2_i4.path3		novel.6245	TRINITY_DN26760_c0_g1_i1.path1	novel.9823	TRINITY_DN5933_c0_g1_i1.path1
TRINITY_DN7170_c0_g1_i12.path1	TRINITY_DN28341_c3_g1_i1.path1	novel.8514	TRINITY_DN283_c1_g1_i5.path3		Pepsico2_Contig7750.path2	novel.9764	Pepsico2_Contig4586.path1	Pepsico2_Contig18189.path1
Pepsico2_Contig2492.path1	TRINITY_DN15878_c0_g1_i6.path1	TRINITY_DN11513_c0_g1_i3.path1	TRINITY_DN73289_c0_g1_i1.path1		TRINITY_DN16376_c0_g1_i2.path1	TRINITY_DN1928_c0_g1_i7.path2	TRINITY_DN17959_c1_g1_i1.path1	novel.3716
TRINITY_DN112740_c0_g1_i1.path2	Pepsico1_Contig945.path1	Pepsico1_Contig7855.path1	novel.1606		Pepsico1_Contig4914.path1	TRINITY_DN15559_c0_g3_i1.path1	TRINITY_DN31787_c0_g1_i2.path1	TRINITY_DN29096_c0_g1_i9.path1
TRINITY_DN34359_c0_g2_i1.path1	Pepsico2_Contig4717.path1	Pepsico2_Contig13090.path1	novel.4631		TRINITY_DN40493_c0_g1_i1.path1	TRINITY_DN4504_c1_g1_i2.path1	TRINITY_DN35164_c0_g1_i1.path2	TRINITY_DN106700_c0_g1_i1.path1
novel.9570	novel.10007	TRINITY_DN22038_c0_g1_i2.path1	TRINITY_DN9674_c0_g3_i1.path1		TRINITY_DN55845_c0_g1_i1.path1	Pepsico2_Contig8810.path1	TRINITY_DN97683_c0_g1_i1.path1	Pepsico1_Contig6449.path5
novel.7555	TRINITY_DN107608_c0_g1_i1.path1	Pepsico2_Contig16099.path1	novel.986		novel.9982	TRINITY_DN26388_c0_g1_i3.path1	novel.4652	TRINITY_DN113066_c0_g1_i1.path1
TRINITY_DN79972_c0_g1_i1.path1	TRINITY_DN24079_c0_g1_i1.path1	TRINITY_DN16544_c0_g2_i2.path1	Pepsico2_Contig4539.path1		Pepsico2_Contig254.path1	novel.6752	TRINITY_DN2337_c0_g1_i6.path2	Pepsico2_Contig16765.path1
TRINITY_DN9225_c0_g1_i1.path1	Pepsico2_Contig14392.path1	Pepsico1_Contig3210.path1	TRINITY_DN32418_c0_g1_i1.path1		TRINITY_DN3365_c0_g2_i2.path1	TRINITY_DN16345_c0_g1_i1.path1	Pepsico2_Contig18864.path1	TRINITY_DN23337_c0_g1_i1.path1
TRINITY_DN3070_c1_g1_i2.path1	TRINITY_DN56537_c0_g1_i1.path1	Pepsico1_Contig21250.path1	TRINITY_DN41724_c1_g1_i4.path1		TRINITY_DN23612_c0_g1_i2.path1	TRINITY_DN19457_c1_g1_i1.path1	TRINITY_DN12417_c0_g2_i1.path1	Pepsico2_Contig7222.path1
TRINITY_DN27112_c0_g3_i3.path1	TRINITY_DN9519_c0_g1_i4.path1	TRINITY_DN40776_c0_g1_i1.path1	novel.6485		novel.8855	TRINITY_DN27316_c0_g1_i2.path2	Pepsico2_Contig4423.path1	TRINITY_DN15185_c0_g3_i5.path1
novel.4836	novel.4538	TRINITY_DN16421_c0_g1_i9.path1	TRINITY_DN18489_c1_g1_i1.path1		Pepsico2_Contig7849.path1	TRINITY_DN13217_c0_g1_i1.path2	Pepsico1_Contig21250.path1	Pepsico2_Contig1307.path1
TRINITY_DN16522_c0_g1_i3.path2	TRINITY_DN1059_c0_g1_i4.path1	TRINITY_DN43953_c0_g2_i1.path1	TRINITY_DN19219_c0_g1_i1.path1		novel.3716	TRINITY_DN38883_c0_g1_i1.path1	TRINITY_DN3062_c2_g1_i2.path1	Pepsico2_Contig6655.path1
TRINITY_DN68885_c0_g1_i1.path1	Pepsico2_Contig367.path1	TRINITY_DN16589_c0_g3_i3.path1	TRINITY_DN32638_c0_g1_i1.path1		TRINITY_DN10009_c0_g2_i2.path1	TRINITY_DN10451_c0_g1_i2.path1	Pepsico2_Contig5143.path1	TRINITY_DN52025_c0_g1_i2.path1
Pepsico2_Contig19245.path1	TRINITY_DN19739_c0_g1_i1.path1	Pepsico2_Contig3750.path2	TRINITY_DN53169_c0_g1_i1.path1		TRINITY_DN1258_c0_g7_i1.path1	TRINITY_DN45877_c0_g1_i1.path1	novel.7730	TRINITY_DN9659_c0_g2_i1.path1
TRINITY_DN22038_c0_g1_i2.path1	novel.2509	TRINITY_DN28026_c0_g1_i1.path1	TRINITY_DN39153_c0_g1_i1.path1		TRINITY_DN4502_c2_g1_i1.path1	novel.1229	TRINITY_DN12979_c0_g1_i5.path1	TRINITY_DN3251_c0_g1_i1.path1
Pepsico1_Contig3652.path2	TRINITY_DN13000_c0_g2_i2.path1	TRINITY_DN6877_c0_g1_i1.path1	TRINITY_DN106240_c0_g1_i1.path1		TRINITY_DN111050_c0_g1_i1.path1	TRINITY_DN39457_c0_g2_i1.path1	TRINITY_DN7653_c0_g2_i2.path1	TRINITY_DN25442_c0_g1_i1.path1
TRINITY_DN475_c0_g1_i14.path1	novel.1990	Pepsico2_Contig337.path1	TRINITY_DN16433_c1_g1_i1.path1		novel.5481	TRINITY_DN2720_c0_g1_i2.path1	TRINITY_DN7209_c0_g1_i10.path1	novel.6139
novel.3628	novel.874	TRINITY_DN5816_c0_g1_i8.path1	TRINITY_DN48354_c0_g2_i1.path1		TRINITY_DN54365_c0_g3_i1.path1	novel.9330	TRINITY_DN36978_c0_g1_i1.path1	TRINITY_DN26760_c0_g1_i1.path1
TRINITY_DN2414_c0_g2_i1.path1	TRINITY_DN15952_c1_g1_i2.path2	Pepsico1_Contig8151.path1	TRINITY_DN11693_c2_g1_i1.path1		Pepsico1_Contig6031.path2	TRINITY_DN17463_c0_g1_i3.path1	novel.1155	TRINITY_DN18437_c0_g1_i2.path1
Pepsico2_Contig20580.path1	novel.2454	novel.5195	TRINITY_DN4595_c0_g3_i1.path1		TRINITY_DN55442_c0_g1_i1.path2	novel.9521	novel.8182	Pepsico1_Contig814.path1
Pepsico2_Contig20185.path1	novel.5070	TRINITY_DN25005_c0_g1_i1.path1	TRINITY_DN31162_c0_g2_i2.path1		TRINITY_DN28035_c0_g1_i1.path3	Pepsico2_Contig7222.path1	TRINITY_DN31162_c0_g2_i2.path1	Pepsico2_Contig498.path1
novel.241	Pepsico1_Contig847.path1	Pepsico2_Contig14412.path3	Pepsico1_Contig1247.path1		novel.1745	TRINITY_DN61815_c0_g1_i1.path1	Pepsico2_Contig20778.path1	TRINITY_DN93760_c0_g1_i1.path1
novel.10292	TRINITY_DN29781_c0_g1_i2.path1	TRINITY_DN36881_c1_g1_i1.path1	novel.2892		Pepsico2_Contig14826.path1	Pepsico2_Contig3315.path1	TRINITY_DN19668_c0_g1_i2.path1	novel.2791
TRINITY_DN4092_c0_g1_i3.path2	TRINITY_DN78066_c0_g1_i1.path1	TRINITY_DN78849_c0_g1_i1.path1	novel.7553		TRINITY_DN10503_c0_g1_i1.path2	TRINITY_DN15087_c1_g1_i1.path1	TRINITY_DN12676_c0_g1_i7.path1	TRINITY_DN15916_c0_g1_i1.path1
TRINITY_DN6460_c1_g2_i1.path2	TRINITY_DN98917_c0_g1_i1.path1	Pepsico2_Contig135.path1	TRINITY_DN13202_c0_g1_i2.path1		TRINITY_DN10100_c0_g3_i7.path1	novel.4885	Pepsico2_Contig17956.path1	TRINITY_DN56759_c0_g1_i4.path1
TRINITY_DN66713_c0_g1_i1.path1	novel.2511	TRINITY_DN25100_c0_g2_i2.path1	Pepsico2_Contig6534.path1		TRINITY_DN113591_c0_g1_i1.path1	TRINITY_DN9047_c2_g3_i1.path1	TRINITY_DN4606_c0_g2_i1.path1	Pepsico2_Contig20608.path1
TRINITY_DN23077_c0_g2_i1.path2	TRINITY_DN69354_c0_g1_i1.path1	TRINITY_DN44023_c0_g1_i4.path1	TRINITY_DN10302_c0_g1_i5.path1		Pepsico2_Contig243.path1	Pepsico2_Contig21203.path1	TRINITY_DN12164_c0_g1_i1.path1	TRINITY_DN31162_c0_g2_i2.path1
TRINITY_DN25442_c0_g1_i1.path1	TRINITY_DN15158_c0_g2_i1.path1	TRINITY_DN18185_c0_g1_i6.path1	TRINITY_DN13830_c1_g1_i1.path1		Pepsico2_Contig7738.path2	TRINITY_DN18292_c0_g3_i1.path1	Pepsico2_Contig5026.path1	Pepsico2_Contig3312.path1
Pepsico2_Contig4152.path1	Pepsico1_Contig2049.path1	TRINITY_DN2993_c1_g1_i1.path1	TRINITY_DN101247_c0_g1_i1.path1		TRINITY_DN10620_c0_g3_i1.path1	TRINITY_DN14533_c0_g1_i4.path1	TRINITY_DN31787_c0_g1_i2.path2	TRINITY_DN27295_c0_g1_i1.path1
TRINITY_DN33625_c0_g1_i1.path1	TRINITY_DN19166_c0_g1_i6.path1	novel.8478	Pepsico2_Contig13188.path1		TRINITY_DN18117_c0_g1_i3.path1	TRINITY_DN12913_c0_g1_i2.path1	TRINITY_DN36731_c0_g1_i1.path2	Pepsico1_Contig6401.path1
TRINITY_DN26262_c0_g1_i1.path2	TRINITY_DN5235_c0_g2_i1.path1	novel.5500	TRINITY_DN35974_c0_g1_i1.path1		TRINITY_DN16513_c0_g2_i1.path1	Pepsico2_Contig17730.path1	novel.10112	Pepsico2_Contig4456.path2
novel.4885	TRINITY_DN26760_c0_g1_i1.path1	novel.2366	TRINITY_DN43475_c0_g1_i1.path2		TRINITY_DN21527_c0_g1_i2.path1	TRINITY_DN115059_c0_g1_i1.path1	Pepsico1_Contig3307.path1	TRINITY_DN10048_c0_g1_i2.path1
TRINITY_DN31623_c0_g1_i1.path1	novel.4885	Pepsico1_Contig3866.path1	TRINITY_DN12176_c0_g1_i8.path1		TRINITY_DN22793_c0_g1_i6.path1	TRINITY_DN28310_c0_g2_i4.path1	novel.6293	novel.2423
TRINITY_DN7915_c1_g1_i1.path1	TRINITY_DN31162_c0_g2_i2.path1	TRINITY_DN1879_c0_g1_i2.path2	TRINITY_DN42395_c0_g3_i1.path1		TRINITY_DN12381_c0_g1_i1.path1	TRINITY_DN44035_c0_g1_i2.path1	TRINITY_DN10928_c0_g1_i7.path2	TRINITY_DN109564_c0_g1_i1.path1
Pepsico2_Contig4961.path1	Pepsico2_Contig5226.path1	TRINITY_DN101432_c0_g1_i1.path1	Pepsico2_Contig18101.path2		Pepsico2_Contig14622.path2	TRINITY_DN52469_c0_g1_i1.path1	TRINITY_DN8969_c0_g1_i5.path1	TRINITY_DN16858_c0_g1_i2.path1
TRINITY_DN72047_c0_g1_i1.path2	novel.5600	Pepsico1_Contig3710.path1	TRINITY_DN26530_c1_g1_i1.path1		Pepsico2_Contig1846.path1	TRINITY_DN24377_c0_g1_i5.path1	TRINITY_DN19368_c0_g1_i7.path1	novel.5478
TRINITY_DN20200_c1_g2_i1.path1	novel.5930	TRINITY_DN38810_c0_g2_i2.path1	TRINITY_DN8365_c1_g1_i7.path1		TRINITY_DN110973_c0_g1_i1.path1	Pepsico1_Contig38028.path1	TRINITY_DN69448_c0_g1_i1.path1	TRINITY_DN21520_c0_g1_i3.path1
TRINITY_DN33238_c0_g1_i1.path1	TRINITY_DN36713_c0_g1_i3.path1	TRINITY_DN45916_c0_g1_i1.path1	TRINITY_DN36862_c0_g1_i1.path3		TRINITY_DN11564_c0_g2_i1.path3	TRINITY_DN18203_c0_g2_i1.path1	Pepsico2_Contig7831.path2	TRINITY_DN39061_c0_g1_i1.path3
TRINITY_DN17219_c0_g1_i2.path1	TRINITY_DN16283_c0_g2_i1.path1	novel.7518	novel.1831		TRINITY_DN29087_c0_g1_i5.path2	TRINITY_DN72765_c0_g1_i1.path1	novel.3405	Pepsico2_Contig10630.path1
TRINITY_DN12836_c0_g1_i3.path1	Pepsico2_Contig5026.path1	TRINITY_DN52988_c0_g1_i1.path1	TRINITY_DN4504_c1_g2_i1.path1		Pepsico2_Contig17640.path1	TRINITY_DN33204_c0_g1_i1.path1	TRINITY_DN16433_c0_g1_i7.path1	TRINITY_DN85820_c0_g1_i1.path1
Pepsico1_Contig1860.path1	TRINITY_DN22413_c0_g1_i1.path1	Pepsico1_Contig340.path2	TRINITY_DN26120_c0_g1_i1.path2		novel.8487	novel.7225	TRINITY_DN22030_c0_g1_i4.path1	Pepsico1_Contig2049.path2
Pepsico2_Contig19479.path1	TRINITY_DN13035_c0_g1_i13.path1	TRINITY_DN44436_c1_g1_i1.path1	TRINITY_DN20691_c0_g1_i1.path2		TRINITY_DN1414_c2_g1_i1.path2	TRINITY_DN879_c0_g2_i1.path1	TRINITY_DN19946_c0_g1_i1.path1	novel.10141
TRINITY_DN11406_c0_g1_i1.path1	TRINITY_DN17301_c0_g1_i1.path1	Pepsico2_Contig12156.path1	TRINITY_DN78066_c0_g1_i1.path1		Pepsico2_Contig10424.path1	Pepsico2_Contig12940.path1	TRINITY_DN23948_c0_g2_i1.path1	TRINITY_DN4132_c1_g1_i1.path1
novel.7286	TRINITY_DN1917_c0_g1_i1.path2	Pepsico1_Contig2081.path1	TRINITY_DN29865_c0_g1_i1.path2		novel.4118	TRINITY_DN37599_c0_g1_i2.path1	Pepsico2_Contig20580.path1	TRINITY_DN19368_c0_g1_i7.path1
novel.8711	TRINITY_DN1696_c0_g1_i4.path1	TRINITY_DN20966_c0_g5_i1.path1	TRINITY_DN17397_c0_g1_i2.path1		novel.5996	Pepsico2_Contig2718.path1	TRINITY_DN32274_c0_g4_i1.path2	TRINITY_DN22464_c0_g1_i3.path1
TRINITY_DN4827_c1_g1_i1.path2	novel.1564	TRINITY_DN9896_c0_g1_i7.path1	TRINITY_DN22425_c0_g1_i1.path1		TRINITY_DN104662_c0_g1_i1.path1	TRINITY_DN44649_c0_g1_i1.path1	Pepsico2_Contig254.path1	TRINITY_DN11606_c0_g1_i4.path1
TRINITY_DN41519_c0_g1_i1.path1	TRINITY_DN38687_c0_g1_i1.path1	TRINITY_DN8792_c0_g1_i1.path2	Pepsico1_Contig3978.path1		TRINITY_DN3623_c1_g2_i3.path1	TRINITY_DN7472_c0_g3_i1.path1	Pepsico2_Contig6846.path2	TRINITY_DN60733_c0_g1_i1.path2
TRINITY_DN1753_c0_g1_i1.path1	Pepsico2_Contig648.path1	Pepsico2_Contig16982.path1	TRINITY_DN38923_c0_g2_i1.path1		Pepsico2_Contig19129.path1	TRINITY_DN53024_c0_g1_i1.path2	Pepsico2_Contig20015.path1	TRINITY_DN36713_c0_g1_i3.path1
TRINITY_DN20010_c1_g3_i1.path1	novel.7775	TRINITY_DN28549_c0_g1_i1.path2	TRINITY_DN20959_c0_g2_i1.path1		TRINITY_DN52261_c0_g1_i1.path1	novel.8619	TRINITY_DN52884_c0_g1_i1.path1	TRINITY_DN18747_c0_g1_i10.path1
TRINITY_DN29271_c0_g1_i2.path1	novel.3089	novel.5523	Pepsico1_Contig6270.path2		TRINITY_DN59775_c0_g1_i1.path1	novel.7357	TRINITY_DN18592_c0_g1_i1.path1	TRINITY_DN1569_c2_g1_i1.path1
Pepsico1_Contig2765.path1	TRINITY_DN108824_c0_g1_i1.path1	TRINITY_DN59952_c0_g1_i1.path1	TRINITY_DN19377_c0_g1_i3.path1		TRINITY_DN36028_c0_g1_i1.path1	TRINITY_DN8001_c0_g1_i3.path1	TRINITY_DN11150_c0_g1_i1.path1	Pepsico2_Contig17684.path1
TRINITY_DN81099_c0_g1_i1.path1	Pepsico1_Contig4013.path2	TRINITY_DN19722_c0_g2_i1.path1	TRINITY_DN29734_c0_g1_i9.path1		novel.4002	novel.585	TRINITY_DN16411_c0_g1_i5.path1	TRINITY_DN11345_c0_g1_i3.path1
Pepsico2_Contig3845.path1	TRINITY_DN76361_c0_g1_i1.path1	TRINITY_DN33361_c0_g1_i5.path2	novel.9609		Pepsico2_Contig12793.path1	Pepsico2_Contig17090.path2	TRINITY_DN14278_c0_g1_i1.path1	TRINITY_DN13217_c0_g1_i1.path2
Pepsico2_Contig12739.path1	Pepsico2_Contig4681.path1	Pepsico2_Contig11254.path1	TRINITY_DN17413_c0_g4_i2.path1		TRINITY_DN8375_c1_g1_i2.path1	Pepsico2_Contig15498.path1	Pepsico2_Contig8599.path1	TRINITY_DN15449_c0_g1_i1.path1
TRINITY_DN103453_c0_g1_i1.path1	TRINITY_DN46714_c0_g1_i1.path1	Pepsico2_Contig20745.path1	TRINITY_DN22733_c1_g1_i3.path1		novel.8408	TRINITY_DN31467_c1_g2_i2.path2	novel.3962	Pepsico2_Contig11149.path1
TRINITY_DN15198_c0_g1_i2.path2	TRINITY_DN81600_c0_g1_i1.path1	Pepsico2_Contig8026.path1	TRINITY_DN18348_c1_g1_i1.path1		TRINITY_DN17114_c0_g1_i13.path1	Pepsico2_Contig5123.path1	TRINITY_DN27940_c0_g1_i2.path2	TRINITY_DN12639_c0_g1_i6.path1
novel.5820	Pepsico1_Contig5476.path2	novel.3565	novel.5338		novel.9013	novel.4050	TRINITY_DN22984_c1_g1_i1.path1	TRINITY_DN931_c0_g2_i2.path1
Pepsico2_Contig2036.path2	TRINITY_DN20062_c0_g1_i1.path1	Pepsico1_Contig36744.path1	TRINITY_DN100960_c0_g1_i1.path1		novel.258	novel.5605	TRINITY_DN12979_c0_g1_i5.path2	novel.9823
TRINITY_DN49457_c0_g1_i4.path1	TRINITY_DN626_c0_g3_i1.path2	Pepsico2_Contig3522.path1	Pepsico1_Contig38046.path1		TRINITY_DN5870_c0_g2_i1.path1	TRINITY_DN1771_c0_g1_i4.path1	Pepsico1_Contig2800.path1	TRINITY_DN26611_c0_g2_i1.path1
Pepsico2_Contig4613.path1	TRINITY_DN52988_c0_g1_i1.path1	Pepsico2_Contig6486.path1	novel.9453		novel.7184	Pepsico2_Contig3536.path1	novel.6995	Pepsico2_Contig4851.path1
novel.1308	TRINITY_DN24825_c0_g4_i2.path1	TRINITY_DN37359_c0_g1_i1.path2	TRINITY_DN37827_c0_g1_i1.path3		TRINITY_DN3003_c0_g4_i1.path1	TRINITY_DN42903_c0_g1_i1.path1	TRINITY_DN27290_c0_g1_i1.path1	TRINITY_DN36977_c1_g1_i1.path1
Pepsico1_Contig5197.path3	Pepsico2_Contig11512.path1	TRINITY_DN38122_c0_g1_i1.path1	novel.9497		TRINITY_DN38896_c0_g1_i1.path1	novel.3234	Pepsico2_Contig4084.path1	TRINITY_DN249_c0_g3_i1.path1
novel.4474	TRINITY_DN40695_c0_g2_i2.path1	Pepsico1_Contig27820.path2	novel.2220		novel.6404	TRINITY_DN20133_c0_g1_i3.path2	TRINITY_DN99301_c0_g1_i1.path1	novel.5410
novel.10337	TRINITY_DN25998_c0_g1_i2.path1	TRINITY_DN26408_c0_g1_i1.path1	Pepsico2_Contig11149.path2		novel.731	TRINITY_DN84717_c0_g1_i1.path1	TRINITY_DN13319_c0_g2_i3.path1	TRINITY_DN45866_c0_g1_i1.path1
TRINITY_DN20545_c0_g2_i1.path1	TRINITY_DN9687_c0_g1_i7.path1	TRINITY_DN29565_c0_g1_i3.path3	TRINITY_DN66631_c0_g1_i1.path1		TRINITY_DN83361_c0_g1_i1.path1	novel.660	Pepsico2_Contig12716.path1	TRINITY_DN26206_c1_g1_i1.path1
TRINITY_DN8233_c0_g3_i1.path1	TRINITY_DN3853_c0_g1_i1.path1	TRINITY_DN3635_c0_g1_i2.path1	TRINITY_DN33191_c0_g1_i2.path1		TRINITY_DN509_c2_g2_i3.path1	TRINITY_DN23929_c0_g1_i1.path1	novel.3971	TRINITY_DN61198_c0_g1_i1.path1
TRINITY_DN13635_c0_g1_i6.path2	novel.9156	novel.8477	novel.9365		TRINITY_DN582_c1_g1_i4.path5	TRINITY_DN11479_c0_g1_i1.path1	TRINITY_DN52469_c0_g1_i1.path1	TRINITY_DN33442_c0_g2_i3.path1
novel.8548	TRINITY_DN82762_c0_g1_i1.path1	Pepsico2_Contig12412.path1	Pepsico2_Contig3314.path1		Pepsico2_Contig20227.path3	TRINITY_DN10927_c0_g1_i1.path1	TRINITY_DN33442_c0_g2_i3.path1	TRINITY_DN26493_c1_g1_i1.path1
novel.742	TRINITY_DN49146_c0_g1_i1.path2	TRINITY_DN15616_c0_g1_i5.path3	novel.9181		TRINITY_DN475_c0_g1_i14.path1	TRINITY_DN17359_c0_g5_i1.path2	TRINITY_DN25758_c0_g1_i2.path1	TRINITY_DN24447_c0_g2_i1.path1
TRINITY_DN43861_c0_g1_i2.path1	TRINITY_DN6877_c0_g2_i1.path1	TRINITY_DN10752_c0_g1_i1.path2	Pepsico1_Contig32793.path1		TRINITY_DN26268_c0_g2_i2.path1	novel.3871	TRINITY_DN15375_c0_g1_i2.path3	TRINITY_DN47813_c0_g1_i1.path1
TRINITY_DN2377_c0_g1_i1.path1	novel.2343	novel.2343	TRINITY_DN99626_c0_g1_i1.path1		TRINITY_DN32389_c0_g1_i1.path1	TRINITY_DN21686_c1_g1_i1.path1	TRINITY_DN15916_c0_g1_i1.path1	TRINITY_DN21832_c0_g1_i1.path1
Pepsico1_Contig636.path1	TRINITY_DN42170_c0_g1_i1.path1	novel.9142	TRINITY_DN29549_c0_g1_i2.path1		novel.4381	TRINITY_DN16713_c0_g1_i1.path1	Pepsico2_Contig16657.path3	TRINITY_DN2964_c0_g2_i1.path1
novel.6630	Pepsico1_Contig7993.path1	TRINITY_DN17962_c1_g1_i1.path2	TRINITY_DN57700_c0_g1_i1.path1		TRINITY_DN5355_c1_g1_i3.path1	TRINITY_DN3489_c0_g1_i2.path1	novel.4058	novel.2760
Pepsico2_Contig4893.path1	TRINITY_DN54627_c0_g1_i1.path1	TRINITY_DN40521_c0_g1_i2.path1	TRINITY_DN9687_c0_g1_i7.path1		TRINITY_DN20053_c0_g1_i1.path1	Pepsico2_Contig16777.path1	TRINITY_DN16345_c0_g1_i1.path1	TRINITY_DN103453_c0_g1_i1.path1
TRINITY_DN29566_c0_g1_i2.path1	TRINITY_DN89105_c0_g1_i1.path1	TRINITY_DN45793_c0_g1_i1.path1	Pepsico1_Contig814.path2		TRINITY_DN72626_c0_g1_i1.path1	TRINITY_DN45447_c0_g1_i1.path1	TRINITY_DN8555_c0_g1_i8.path1	TRINITY_DN11562_c0_g1_i1.path1
TRINITY_DN15240_c0_g1_i3.path1	Pepsico1_Contig31918.path1	TRINITY_DN55546_c0_g1_i1.path1	TRINITY_DN2993_c1_g1_i1.path1		Pepsico2_Contig18850.path1	Pepsico2_Contig12388.path1	Pepsico2_Contig19669.path1	TRINITY_DN11687_c0_g1_i1.path1
novel.2921	TRINITY_DN17975_c0_g1_i11.path1	TRINITY_DN15949_c0_g1_i1.path1	TRINITY_DN94969_c0_g1_i1.path1		TRINITY_DN4474_c1_g1_i3.path2	TRINITY_DN74622_c0_g1_i1.path1	TRINITY_DN16961_c0_g1_i5.path1	TRINITY_DN28048_c0_g1_i1.path2
TRINITY_DN5457_c0_g1_i2.path1	novel.9940	novel.4671	TRINITY_DN60211_c0_g1_i1.path1		TRINITY_DN32349_c0_g1_i2.path1	TRINITY_DN15885_c0_g1_i1.path1	Pepsico2_Contig1781.path1	TRINITY_DN19739_c0_g1_i1.path1
novel.7249	TRINITY_DN12872_c0_g1_i1.path1	TRINITY_DN30388_c0_g1_i1.path1	Pepsico1_Contig5731.path1		TRINITY_DN21169_c0_g3_i1.path1	TRINITY_DN13120_c0_g3_i1.path1	Pepsico2_Contig5219.path1	TRINITY_DN12659_c0_g1_i5.path1
TRINITY_DN42474_c0_g1_i1.path2	novel.6691	TRINITY_DN33165_c0_g3_i2.path1	novel.2124		TRINITY_DN71520_c0_g1_i1.path1	novel.678	novel.6364	TRINITY_DN11379_c0_g1_i4.path1
novel.3005	TRINITY_DN7193_c0_g1_i2.path1	TRINITY_DN8484_c0_g4_i1.path1	novel.3041		novel.7010	Pepsico2_Contig13129.path1	TRINITY_DN8445_c0_g2_i1.path1	TRINITY_DN6583_c0_g5_i1.path1
TRINITY_DN44620_c0_g1_i2.path1	TRINITY_DN1803_c3_g1_i1.path1	Pepsico1_Contig1795.path2	TRINITY_DN37342_c0_g2_i1.path1		TRINITY_DN2365_c0_g1_i15.path1	TRINITY_DN38626_c0_g3_i1.path1	TRINITY_DN2720_c0_g1_i2.path1	TRINITY_DN6633_c0_g1_i5.path1
TRINITY_DN5109_c0_g1_i2.path1	novel.9181	novel.3721	Pepsico2_Contig1185.path2		Pepsico1_Contig24518.path1	TRINITY_DN19336_c0_g1_i1.path1	TRINITY_DN20691_c0_g2_i1.path1	novel.4114
Pepsico2_Contig7222.path1	TRINITY_DN5010_c0_g1_i1.path1	TRINITY_DN37342_c0_g2_i1.path1	TRINITY_DN108193_c0_g1_i1.path1		TRINITY_DN40354_c0_g1_i2.path1	TRINITY_DN4119_c1_g1_i4.path1	TRINITY_DN50482_c1_g2_i1.path1	TRINITY_DN33471_c0_g1_i1.path1
novel.4940	TRINITY_DN12193_c0_g2_i1.path2	novel.3041	novel.8598		Pepsico2_Contig7839.path1	Pepsico2_Contig6378.path1	TRINITY_DN8360_c1_g1_i1.path2	TRINITY_DN27940_c0_g1_i2.path2
Pepsico1_Contig17513.path2	TRINITY_DN36862_c0_g1_i1.path3	novel.4730	Pepsico2_Contig7175.path1		Pepsico2_Contig831.path1	novel.9466	Pepsico2_Contig20185.path1	TRINITY_DN20545_c0_g2_i1.path1
TRINITY_DN24784_c1_g1_i1.path2	novel.2369	Pepsico1_Contig5337.path1	Pepsico1_Contig5077.path1		TRINITY_DN5831_c0_g1_i3.path1	TRINITY_DN20889_c1_g1_i1.path1	Pepsico2_Contig583.path2	Pepsico2_Contig11409.path1
TRINITY_DN11476_c0_g1_i5.path2	TRINITY_DN14533_c0_g1_i4.path2	TRINITY_DN10066_c1_g2_i1.path1	TRINITY_DN36898_c0_g1_i7.path1		TRINITY_DN21268_c0_g1_i1.path2	Pepsico2_Contig7520.path1	TRINITY_DN397_c0_g2_i1.path1	Pepsico2_Contig8080.path1
TRINITY_DN16283_c0_g2_i1.path1	novel.7193	Pepsico1_Contig7487.path1	novel.7176		TRINITY_DN24786_c0_g1_i1.path2	TRINITY_DN47321_c0_g2_i1.path1	TRINITY_DN38626_c0_g3_i1.path1	novel.3712
TRINITY_DN8538_c0_g1_i1.path1	TRINITY_DN28048_c0_g1_i1.path2	Pepsico1_Contig7004.path1	novel.9685		TRINITY_DN10907_c0_g2_i2.path1	novel.6711	novel.7729	novel.7060
TRINITY_DN99493_c0_g1_i1.path1	Pepsico1_Contig47.path1	Pepsico2_Contig7794.path1	Pepsico1_Contig847.path1		novel.1396	TRINITY_DN101418_c0_g1_i1.path1	TRINITY_DN16015_c0_g1_i1.path1	TRINITY_DN30872_c0_g1_i1.path1
Pepsico1_Contig5630.path1	TRINITY_DN16295_c0_g1_i1.path2	TRINITY_DN46714_c0_g1_i1.path1	TRINITY_DN33761_c0_g1_i2.path1		TRINITY_DN24976_c0_g1_i1.path1	TRINITY_DN5444_c0_g1_i2.path2	TRINITY_DN17829_c0_g1_i1.path2	Pepsico1_Contig1044.path1
novel.1596	TRINITY_DN2210_c0_g2_i3.path1	Pepsico1_Contig25289.path1	Pepsico1_Contig886.path1		novel.10460	Pepsico2_Contig17956.path1	TRINITY_DN13120_c0_g3_i1.path1	novel.3461
TRINITY_DN2850_c0_g3_i1.path2	TRINITY_DN52884_c0_g1_i1.path1	Pepsico1_Contig1029.path2	TRINITY_DN14561_c0_g1_i11.path1		Pepsico1_Contig6596.path2	Pepsico2_Contig90.path1	Pepsico2_Contig20783.path1	TRINITY_DN8456_c1_g1_i1.path1
Pepsico1_Contig7579.path1	TRINITY_DN63062_c0_g1_i1.path1	Pepsico2_Contig11507.path1	novel.4818		Pepsico2_Contig4411.path1	TRINITY_DN21717_c0_g1_i1.path1	novel.263	TRINITY_DN23428_c0_g1_i1.path1
TRINITY_DN114796_c0_g1_i1.path1	TRINITY_DN29249_c0_g1_i1.path1	TRINITY_DN4830_c0_g3_i1.path1	TRINITY_DN7209_c0_g5_i1.path2		TRINITY_DN1803_c3_g1_i1.path1	Pepsico2_Contig13626.path1	TRINITY_DN15878_c0_g1_i6.path1	TRINITY_DN50781_c0_g1_i1.path1
TRINITY_DN23675_c0_g1_i2.path1	TRINITY_DN17432_c0_g1_i2.path1	TRINITY_DN15392_c0_g1_i1.path1	TRINITY_DN20865_c0_g1_i2.path1		Pepsico1_Contig2324.path1	TRINITY_DN12795_c0_g2_i1.path1	novel.9967	TRINITY_DN63758_c0_g1_i1.path1
TRINITY_DN3587_c0_g1_i5.path1	TRINITY_DN581_c4_g1_i3.path1	TRINITY_DN11041_c0_g2_i1.path1	TRINITY_DN16510_c0_g1_i1.path2		Pepsico2_Contig8781.path1	novel.2676	TRINITY_DN19508_c1_g1_i1.path2	TRINITY_DN15594_c0_g1_i4.path1
Pepsico2_Contig2264.path1	TRINITY_DN8280_c0_g2_i1.path2	TRINITY_DN36770_c1_g1_i1.path1	TRINITY_DN13120_c0_g3_i1.path1		TRINITY_DN21832_c0_g1_i1.path1	TRINITY_DN109452_c0_g1_i1.path1	novel.3143	TRINITY_DN88673_c0_g1_i1.path1
novel.101	TRINITY_DN5790_c0_g1_i3.path1	TRINITY_DN16858_c0_g1_i2.path1	novel.3643		novel.3824	Pepsico2_Contig17168.path1	novel.6297	TRINITY_DN78921_c0_g1_i1.path1
Pepsico2_Contig16807.path1	novel.6630	TRINITY_DN17072_c1_g2_i1.path1	Pepsico2_Contig18624.path1		TRINITY_DN61899_c0_g1_i1.path1	Pepsico2_Contig5226.path1	novel.8002	novel.9200
TRINITY_DN310_c1_g1_i3.path1	TRINITY_DN13417_c0_g2_i1.path1	Pepsico2_Contig11410.path1	TRINITY_DN19946_c0_g1_i1.path1		novel.9056	TRINITY_DN15012_c0_g1_i2.path1	Pepsico2_Contig16777.path1	novel.10304
Pepsico2_Contig10529.path1	Pepsico1_Contig5709.path1	TRINITY_DN47813_c0_g1_i1.path1	Pepsico1_Contig6029.path1		TRINITY_DN103529_c0_g1_i1.path1	TRINITY_DN37150_c0_g1_i1.path1	TRINITY_DN36881_c0_g3_i1.path1	Pepsico2_Contig16525.path1
novel.4050	TRINITY_DN46656_c0_g1_i1.path1	TRINITY_DN19946_c0_g1_i1.path1	Pepsico1_Contig33658.path1		novel.1990	novel.1187	TRINITY_DN14962_c0_g1_i1.path1	TRINITY_DN43320_c0_g1_i1.path1
TRINITY_DN32149_c0_g1_i1.path1	Pepsico2_Contig12692.path5	TRINITY_DN11606_c0_g1_i4.path1	Pepsico1_Contig5881.path2		TRINITY_DN56759_c0_g1_i4.path2	Pepsico2_Contig4961.path1	Pepsico2_Contig20286.path1	TRINITY_DN30789_c0_g2_i1.path2
TRINITY_DN3072_c0_g2_i1.path1	Pepsico2_Contig18850.path1	TRINITY_DN35335_c0_g4_i2.path1	TRINITY_DN8794_c0_g2_i3.path1		TRINITY_DN103039_c0_g1_i1.path1	TRINITY_DN76132_c0_g1_i1.path1	TRINITY_DN23043_c0_g1_i5.path1	novel.2498
Pepsico1_Contig6961.path1	Pepsico2_Contig4425.path1	TRINITY_DN43475_c0_g1_i1.path2	TRINITY_DN37187_c1_g1_i1.path1		Pepsico1_Contig1102.path1	TRINITY_DN2053_c0_g1_i15.path1	TRINITY_DN19732_c1_g1_i2.path2	Pepsico1_Contig5881.path2
TRINITY_DN36881_c1_g1_i1.path1	TRINITY_DN10240_c0_g1_i12.path2	novel.4985	novel.5691			TRINITY_DN10656_c0_g3_i1.path3	TRINITY_DN18153_c0_g2_i1.path4	novel.8383
TRINITY_DN20842_c0_g1_i4.path2	TRINITY_DN11167_c2_g1_i1.path2	TRINITY_DN83317_c0_g1_i1.path1	TRINITY_DN27463_c0_g1_i1.path1			TRINITY_DN91140_c0_g1_i1.path1	novel.4984	TRINITY_DN9393_c0_g1_i1.path1
Pepsico2_Contig20252.path1	novel.9838	novel.1492	novel.7396			TRINITY_DN71827_c0_g1_i1.path1	TRINITY_DN9072_c0_g1_i3.path1	TRINITY_DN62409_c0_g1_i1.path1
TRINITY_DN34195_c0_g1_i2.path1	novel.2067	TRINITY_DN36713_c0_g1_i3.path1	novel.158			TRINITY_DN19031_c1_g1_i1.path1	Pepsico2_Contig14315.path1	TRINITY_DN5990_c2_g1_i2.path1
TRINITY_DN11167_c2_g1_i1.path1	TRINITY_DN20980_c0_g2_i1.path1	TRINITY_DN31190_c0_g1_i2.path1	novel.5337			novel.4121	TRINITY_DN76151_c0_g1_i1.path1	TRINITY_DN56274_c0_g1_i1.path1
TRINITY_DN14533_c0_g1_i4.path2	Pepsico2_Contig10529.path2	TRINITY_DN56948_c0_g1_i1.path1	TRINITY_DN15878_c0_g1_i6.path1			Pepsico2_Contig17815.path1	TRINITY_DN98307_c0_g1_i1.path1	Pepsico1_Contig5677.path1
TRINITY_DN109902_c0_g1_i1.path1	novel.8750	Pepsico2_Contig18101.path2	novel.7034			Pepsico2_Contig3832.path1	TRINITY_DN71457_c0_g1_i1.path1	TRINITY_DN14625_c0_g2_i1.path1
novel.2676	TRINITY_DN19219_c0_g1_i1.path1	novel.1857	TRINITY_DN15112_c0_g2_i1.path1			TRINITY_DN7653_c0_g2_i2.path1	novel.9961	TRINITY_DN2993_c1_g1_i1.path1
TRINITY_DN66377_c0_g1_i1.path1	novel.8682	TRINITY_DN12406_c0_g1_i3.path2	TRINITY_DN2098_c1_g1_i5.path1			TRINITY_DN11047_c0_g1_i1.path1	novel.8351	TRINITY_DN4132_c0_g2_i1.path1
TRINITY_DN10134_c0_g2_i1.path2	novel.6583	TRINITY_DN8338_c0_g2_i1.path2	TRINITY_DN64736_c0_g1_i1.path1			Pepsico2_Contig18065.path1	TRINITY_DN101698_c0_g1_i1.path1	TRINITY_DN53070_c0_g1_i1.path3
Pepsico2_Contig7283.path1	TRINITY_DN30653_c0_g1_i1.path1	Pepsico1_Contig2398.path1	TRINITY_DN581_c4_g1_i3.path1			novel.2733	TRINITY_DN76849_c0_g1_i1.path1	novel.8169
Pepsico2_Contig12308.path2	TRINITY_DN11470_c0_g1_i1.path1	Pepsico2_Contig3449.path1	TRINITY_DN21520_c0_g1_i3.path1			Pepsico2_Contig20779.path1	novel.5699	Pepsico2_Contig18850.path1
TRINITY_DN13197_c0_g1_i1.path1	novel.8235	novel.5203	TRINITY_DN28511_c1_g2_i1.path1			novel.9213	TRINITY_DN108540_c0_g1_i1.path1	novel.9891
TRINITY_DN38821_c0_g1_i6.path1	TRINITY_DN97867_c0_g1_i1.path1	TRINITY_DN29233_c0_g1_i2.path1	novel.295			novel.9814	TRINITY_DN22030_c0_g1_i4.path2	TRINITY_DN30537_c0_g1_i1.path1
TRINITY_DN21213_c0_g1_i2.path1	Pepsico2_Contig11330.path1	TRINITY_DN25461_c0_g1_i1.path2	novel.73			TRINITY_DN53014_c0_g1_i2.path1	TRINITY_DN16825_c0_g1_i7.path1	Pepsico2_Contig12940.path1
TRINITY_DN28019_c0_g1_i9.path1	Pepsico2_Contig18624.path1	TRINITY_DN9950_c0_g1_i8.path1	TRINITY_DN27247_c0_g1_i1.path1			Pepsico2_Contig17626.path2	TRINITY_DN80438_c0_g1_i1.path1	TRINITY_DN19308_c0_g1_i4.path1
TRINITY_DN7178_c0_g2_i1.path1	Pepsico1_Contig3082.path1	Pepsico1_Contig3074.path1	novel.5137			Pepsico1_Contig886.path1	TRINITY_DN106240_c0_g1_i1.path1	TRINITY_DN25103_c0_g1_i1.path1
Pepsico1_Contig22460.path1	TRINITY_DN7209_c0_g1_i10.path1	TRINITY_DN8729_c1_g1_i1.path1	TRINITY_DN7466_c0_g1_i7.path1			novel.2076	TRINITY_DN13804_c0_g1_i1.path2	TRINITY_DN18686_c0_g1_i1.path1
TRINITY_DN8494_c0_g3_i2.path1	TRINITY_DN5321_c0_g1_i10.path2	TRINITY_DN29568_c0_g1_i1.path1	Pepsico1_Contig1795.path2			novel.8042	TRINITY_DN74622_c0_g1_i1.path1	TRINITY_DN10545_c0_g1_i3.path1
novel.7098	TRINITY_DN23948_c0_g2_i1.path1	TRINITY_DN69304_c0_g1_i1.path1	novel.5523			TRINITY_DN21608_c0_g1_i1.path1	TRINITY_DN10134_c0_g1_i1.path1	TRINITY_DN51712_c0_g1_i1.path1
TRINITY_DN16403_c0_g1_i3.path1	TRINITY_DN7311_c0_g1_i1.path1	TRINITY_DN17432_c0_g1_i2.path1	novel.7642			novel.380	novel.7086	TRINITY_DN11768_c0_g1_i1.path1
TRINITY_DN21095_c0_g1_i1.path1	TRINITY_DN32584_c0_g1_i1.path1	TRINITY_DN12176_c0_g1_i8.path1	TRINITY_DN32159_c0_g1_i1.path1			TRINITY_DN23273_c0_g1_i2.path1	TRINITY_DN22587_c0_g1_i1.path1	TRINITY_DN36958_c0_g2_i1.path1
Pepsico1_Contig4893.path3	TRINITY_DN32075_c0_g3_i1.path1	TRINITY_DN5293_c0_g1_i2.path2	TRINITY_DN16295_c0_g1_i1.path2			Pepsico2_Contig13220.path1	TRINITY_DN10048_c0_g1_i2.path1	Pepsico1_Contig892.path1
Pepsico1_Contig31861.path1	novel.9497	TRINITY_DN53070_c0_g1_i1.path1	TRINITY_DN38122_c0_g1_i1.path1			TRINITY_DN14933_c0_g3_i1.path2	TRINITY_DN571_c0_g1_i1.path1	TRINITY_DN14410_c0_g1_i1.path1
novel.8383	Pepsico2_Contig5996.path2	Pepsico2_Contig20592.path1	TRINITY_DN43817_c0_g1_i1.path1			TRINITY_DN7411_c0_g1_i2.path2	TRINITY_DN8174_c0_g1_i4.path1	Pepsico1_Contig4930.path1
Pepsico2_Contig4775.path1	Pepsico2_Contig8092.path1	novel.5375	TRINITY_DN33305_c0_g3_i1.path1			novel.10230	novel.675	novel.5334
TRINITY_DN40440_c0_g1_i1.path1	Pepsico2_Contig8333.path3	novel.9671	TRINITY_DN9887_c0_g3_i1.path2			novel.7716	TRINITY_DN64549_c0_g1_i1.path1	Pepsico2_Contig6237.path2
TRINITY_DN7656_c0_g1_i1.path1	TRINITY_DN16818_c0_g3_i1.path1	TRINITY_DN33191_c0_g1_i2.path1	TRINITY_DN22038_c0_g1_i2.path1			Pepsico2_Contig17684.path1	Pepsico2_Contig12768.path1	TRINITY_DN13657_c0_g1_i2.path1
Pepsico1_Contig31958.path1	Pepsico1_Contig5817.path1	TRINITY_DN12_c0_g1_i1.path2	TRINITY_DN21834_c0_g1_i1.path3			TRINITY_DN12676_c0_g1_i7.path1	TRINITY_DN43227_c0_g1_i2.path1	TRINITY_DN16522_c0_g1_i3.path1
TRINITY_DN93619_c0_g1_i1.path1	TRINITY_DN12913_c0_g1_i2.path2	TRINITY_DN29950_c0_g1_i1.path1	TRINITY_DN21470_c0_g1_i2.path2			TRINITY_DN22092_c0_g1_i2.path2	TRINITY_DN10806_c1_g3_i2.path2	TRINITY_DN27335_c0_g1_i1.path1
TRINITY_DN2977_c0_g1_i11.path2	TRINITY_DN16513_c0_g1_i5.path1	novel.10292	TRINITY_DN15272_c0_g2_i1.path1			TRINITY_DN88329_c0_g1_i1.path1	TRINITY_DN43817_c0_g1_i1.path1	Pepsico2_Contig21203.path1
TRINITY_DN20656_c0_g1_i2.path1	novel.1856	TRINITY_DN933_c0_g1_i4.path1	Pepsico2_Contig17149.path2			TRINITY_DN96412_c0_g1_i1.path1	novel.4121	Pepsico2_Contig17704.path1
TRINITY_DN32075_c0_g5_i3.path1	TRINITY_DN64549_c0_g1_i1.path1	novel.9271	novel.2366			novel.3242	Pepsico2_Contig17137.path1	TRINITY_DN49473_c0_g1_i1.path1
TRINITY_DN59339_c0_g1_i2.path2	Pepsico2_Contig3495.path1	TRINITY_DN89105_c0_g1_i1.path1	TRINITY_DN63758_c0_g1_i1.path1			Pepsico2_Contig10959.path1	TRINITY_DN36154_c0_g1_i3.path1	TRINITY_DN27140_c0_g1_i1.path1
TRINITY_DN977_c0_g1_i5.path2	TRINITY_DN22203_c1_g1_i2.path2	TRINITY_DN11199_c0_g1_i8.path2	novel.2539			TRINITY_DN38655_c0_g1_i1.path1	TRINITY_DN9291_c0_g1_i1.path1	TRINITY_DN8001_c0_g1_i3.path1
Pepsico2_Contig14670.path2	TRINITY_DN5970_c2_g1_i1.path1	Pepsico2_Contig3011.path2	Pepsico1_Contig3025.path1			TRINITY_DN25465_c0_g1_i1.path1	TRINITY_DN24212_c0_g1_i1.path1	TRINITY_DN21572_c0_g1_i1.path1
TRINITY_DN19732_c1_g1_i2.path1	Pepsico2_Contig14747.path1	TRINITY_DN47408_c0_g2_i1.path1	novel.8937			TRINITY_DN25572_c0_g1_i1.path1	Pepsico2_Contig20569.path3	TRINITY_DN20994_c0_g1_i1.path2
TRINITY_DN65526_c0_g1_i1.path1	novel.3361	Pepsico1_Contig5881.path2	novel.2184			TRINITY_DN104209_c0_g1_i1.path1	TRINITY_DN15718_c0_g1_i3.path1	Pepsico2_Contig11038.path1
TRINITY_DN22733_c1_g1_i3.path1	Pepsico2_Contig1038.path1	TRINITY_DN27399_c0_g1_i3.path2	TRINITY_DN21244_c0_g1_i3.path1			novel.1449	Pepsico1_Contig35521.path2	novel.8149
Pepsico2_Contig15428.path1	TRINITY_DN86219_c0_g1_i1.path1	novel.5337	novel.5226			TRINITY_DN32274_c0_g4_i1.path2	novel.6394	Pepsico2_Contig3586.path1
TRINITY_DN11373_c1_g1_i12.path2	Pepsico2_Contig9996.path1	TRINITY_DN29964_c0_g3_i1.path1	TRINITY_DN1671_c1_g1_i1.path2			TRINITY_DN50814_c0_g1_i6.path1	Pepsico2_Contig15240.path1	TRINITY_DN35875_c0_g1_i1.path1
Pepsico2_Contig14448.path1	TRINITY_DN14957_c0_g1_i3.path1	novel.2845	novel.2511			Pepsico2_Contig3181.path1	TRINITY_DN53627_c0_g2_i2.path1	novel.2036
TRINITY_DN21728_c0_g1_i1.path3	TRINITY_DN28896_c0_g1_i1.path1	novel.2123	TRINITY_DN31413_c0_g1_i4.path1			TRINITY_DN6293_c0_g1_i1.path1	TRINITY_DN62134_c2_g1_i1.path2	TRINITY_DN102507_c0_g1_i1.path1
TRINITY_DN18868_c0_g1_i1.path1	novel.9283	TRINITY_DN32994_c0_g1_i1.path1	novel.9498			TRINITY_DN33391_c0_g1_i1.path1	novel.2935	TRINITY_DN4785_c0_g1_i7.path1
Pepsico2_Contig20384.path1	novel.1565	TRINITY_DN13705_c0_g3_i1.path1	Pepsico2_Contig3011.path2			novel.4929	TRINITY_DN14098_c0_g3_i1.path1	TRINITY_DN11450_c3_g1_i1.path1
TRINITY_DN8648_c0_g1_i4.path2	novel.8910	novel.3720	TRINITY_DN59952_c0_g1_i1.path1			novel.9288	novel.4114	Pepsico2_Contig5226.path1
novel.6147	novel.8823	TRINITY_DN32533_c0_g1_i1.path2	TRINITY_DN12748_c0_g1_i2.path1			Pepsico2_Contig14361.path1	TRINITY_DN25572_c0_g1_i1.path1	novel.5601
TRINITY_DN82468_c0_g1_i1.path1	Pepsico2_Contig14783.path1	TRINITY_DN52884_c0_g1_i1.path1	TRINITY_DN2337_c0_g2_i1.path1			TRINITY_DN2492_c0_g1_i1.path1	TRINITY_DN21860_c0_g3_i2.path1	TRINITY_DN47947_c0_g1_i1.path1
Pepsico1_Contig2203.path1	novel.8383	TRINITY_DN24121_c0_g1_i1.path1	novel.1031			TRINITY_DN2657_c0_g1_i2.path1	Pepsico1_Contig38028.path1	TRINITY_DN57668_c0_g1_i1.path1
novel.8255	Pepsico1_Contig2398.path2	novel.8138	TRINITY_DN34811_c1_g1_i1.path3			TRINITY_DN24869_c0_g1_i2.path1	TRINITY_DN16567_c0_g1_i1.path1	Pepsico2_Contig7223.path1
TRINITY_DN23712_c0_g3_i1.path1	novel.5932	TRINITY_DN88218_c0_g1_i2.path1	TRINITY_DN32500_c0_g1_i1.path2			TRINITY_DN11286_c0_g1_i1.path1	TRINITY_DN32977_c0_g2_i1.path1	Pepsico2_Contig17149.path1
Pepsico2_Contig4423.path1	TRINITY_DN557_c0_g1_i2.path1	TRINITY_DN44073_c0_g1_i1.path1	TRINITY_DN106726_c0_g1_i1.path1			novel.731	TRINITY_DN93432_c0_g1_i1.path1	TRINITY_DN34099_c0_g1_i2.path1
TRINITY_DN13507_c0_g1_i1.path1	Pepsico2_Contig20778.path1	novel.9427	novel.9057			TRINITY_DN1534_c0_g1_i1.path1	TRINITY_DN35335_c0_g4_i2.path1	novel.6995
Pepsico2_Contig18357.path1	Pepsico1_Contig5476.path1	Pepsico2_Contig17149.path1	novel.8154			TRINITY_DN64678_c0_g1_i1.path1	TRINITY_DN16929_c1_g1_i4.path1	TRINITY_DN16929_c1_g1_i4.path1
Pepsico2_Contig6611.path2	TRINITY_DN12676_c0_g1_i7.path1	TRINITY_DN24551_c0_g1_i1.path1	TRINITY_DN5076_c0_g1_i5.path1			TRINITY_DN28232_c0_g1_i2.path1	novel.7111	novel.4236
Pepsico2_Contig15246.path1	TRINITY_DN15455_c0_g1_i7.path2	novel.8881	TRINITY_DN6882_c1_g1_i1.path1			TRINITY_DN94515_c0_g1_i1.path1	novel.3663	TRINITY_DN35060_c1_g1_i1.path1
TRINITY_DN4604_c0_g2_i1.path1	TRINITY_DN1085_c0_g1_i9.path1	novel.7021	TRINITY_DN19739_c0_g1_i1.path1			TRINITY_DN36881_c0_g3_i1.path1	TRINITY_DN11198_c0_g1_i5.path1	TRINITY_DN12913_c0_g1_i2.path2
TRINITY_DN43686_c0_g1_i1.path1	novel.4180	TRINITY_DN14904_c0_g1_i1.path2	novel.7770			novel.9146	Pepsico2_Contig6250.path1	TRINITY_DN32312_c0_g1_i1.path1
Pepsico1_Contig33503.path3	TRINITY_DN44459_c0_g1_i1.path1	TRINITY_DN52415_c0_g1_i1.path1	TRINITY_DN82150_c0_g1_i1.path1			Pepsico2_Contig5650.path1	Pepsico2_Contig8781.path1	TRINITY_DN97533_c0_g1_i1.path1
TRINITY_DN1120_c0_g2_i4.path1	TRINITY_DN11398_c0_g2_i1.path1	novel.6031	TRINITY_DN19057_c0_g1_i1.path1			TRINITY_DN29087_c0_g1_i5.path2	TRINITY_DN21832_c0_g1_i1.path1	TRINITY_DN23413_c0_g2_i1.path1
novel.5002	Pepsico1_Contig196.path1	Pepsico2_Contig6340.path1	TRINITY_DN16351_c0_g1_i2.path1			Pepsico2_Contig2607.path1	novel.5704	Pepsico1_Contig814.path2
Pepsico2_Contig14627.path1	TRINITY_DN19228_c0_g1_i7.path1	TRINITY_DN106731_c0_g1_i1.path1	novel.6673			Pepsico2_Contig254.path1	TRINITY_DN59339_c0_g1_i2.path1	TRINITY_DN18158_c0_g2_i2.path1
Pepsico1_Contig5866.path1	TRINITY_DN26262_c0_g1_i1.path2	Pepsico1_Contig847.path1	novel.1857			TRINITY_DN17439_c0_g1_i1.path2	TRINITY_DN27316_c0_g1_i2.path1	TRINITY_DN16513_c0_g2_i1.path1
TRINITY_DN16277_c0_g1_i4.path1	TRINITY_DN13963_c0_g1_i1.path1	TRINITY_DN21832_c0_g1_i1.path1	novel.8190			TRINITY_DN11150_c1_g2_i1.path1	novel.5070	TRINITY_DN20815_c0_g2_i1.path1
TRINITY_DN107882_c0_g1_i1.path1	TRINITY_DN92366_c0_g1_i1.path1	TRINITY_DN60211_c0_g1_i1.path1	TRINITY_DN12433_c0_g1_i3.path2			TRINITY_DN7178_c0_g2_i1.path1	Pepsico2_Contig4658.path1	Pepsico1_Contig37830.path1
TRINITY_DN55197_c0_g1_i1.path1	TRINITY_DN3106_c0_g2_i1.path1	Pepsico1_Contig140.path1	novel.3565			Pepsico2_Contig18178.path1	Pepsico2_Contig17522.path1	TRINITY_DN28223_c0_g1_i1.path1
Pepsico1_Contig5656.path1	Pepsico2_Contig5879.path1	TRINITY_DN29265_c0_g1_i1.path2	novel.5195			TRINITY_DN41308_c1_g1_i1.path1	novel.7102	TRINITY_DN13964_c0_g2_i1.path1
Pepsico2_Contig6290.path3	novel.9574	TRINITY_DN14198_c0_g1_i1.path1	TRINITY_DN17329_c0_g1_i3.path1			Pepsico2_Contig17288.path1	TRINITY_DN25572_c0_g1_i1.path2	TRINITY_DN10194_c2_g1_i1.path1
TRINITY_DN23337_c0_g1_i1.path1	TRINITY_DN19900_c0_g2_i1.path1	TRINITY_DN10932_c1_g2_i2.path1	TRINITY_DN24125_c0_g1_i1.path1			TRINITY_DN3786_c0_g1_i1.path1	TRINITY_DN7656_c0_g1_i1.path1	Pepsico2_Contig5026.path1
TRINITY_DN33220_c0_g1_i1.path1	TRINITY_DN11951_c0_g1_i1.path1	Pepsico2_Contig16834.path1	TRINITY_DN9252_c1_g1_i1.path2			TRINITY_DN87_c0_g1_i1.path2	novel.7477	TRINITY_DN32102_c0_g2_i2.path2
Pepsico2_Contig20155.path1	TRINITY_DN17492_c0_g1_i1.path1	Pepsico1_Contig8151.path2	TRINITY_DN20518_c0_g1_i1.path1			TRINITY_DN25758_c0_g1_i2.path1	Pepsico2_Contig17626.path2	novel.82
Pepsico2_Contig1676.path1	TRINITY_DN37868_c0_g1_i1.path1	novel.7443	novel.2969			novel.2404	TRINITY_DN933_c0_g1_i4.path1	TRINITY_DN20672_c0_g1_i1.path3
TRINITY_DN61198_c0_g1_i1.path1	Pepsico2_Contig3314.path1	Pepsico2_Contig17803.path2	TRINITY_DN101247_c0_g1_i1.path2			TRINITY_DN2852_c0_g1_i3.path2	TRINITY_DN63062_c0_g1_i1.path1	Pepsico1_Contig1649.path1
novel.828	TRINITY_DN8626_c0_g1_i1.path1	TRINITY_DN17545_c0_g1_i1.path1	novel.9018			TRINITY_DN18448_c0_g1_i2.path1	TRINITY_DN22791_c0_g2_i1.path1	Pepsico2_Contig11122.path1
TRINITY_DN21253_c0_g5_i1.path1	Pepsico1_Contig2405.path1	Pepsico2_Contig17958.path1	TRINITY_DN44294_c0_g1_i1.path1			TRINITY_DN26361_c0_g1_i1.path1	TRINITY_DN45866_c0_g1_i1.path1	Pepsico2_Contig2010.path1
TRINITY_DN37282_c0_g1_i1.path2	Pepsico2_Contig3401.path1	novel.2561	Pepsico2_Contig5996.path1			TRINITY_DN31076_c0_g1_i4.path2	TRINITY_DN11477_c1_g2_i1.path1	TRINITY_DN21752_c0_g1_i2.path2
novel.288	Pepsico1_Contig31869.path1	TRINITY_DN92652_c0_g1_i1.path3	Pepsico1_Contig24518.path1			TRINITY_DN62134_c5_g1_i1.path1	TRINITY_DN20875_c0_g1_i1.path2	Pepsico2_Contig19415.path1
novel.10007	TRINITY_DN13945_c0_g1_i6.path1	Pepsico2_Contig14392.path1	Pepsico2_Contig16765.path1			novel.4631	novel.2029	Pepsico2_Contig5996.path1
TRINITY_DN90629_c0_g1_i1.path1	TRINITY_DN112669_c0_g1_i1.path1	TRINITY_DN93760_c0_g1_i1.path1	novel.5460			TRINITY_DN22397_c1_g1_i1.path1	Pepsico2_Contig11928.path1	novel.7000
novel.1640	Pepsico2_Contig7452.path1	TRINITY_DN5010_c0_g1_i1.path1	TRINITY_DN6454_c0_g2_i1.path2			TRINITY_DN25287_c0_g2_i1.path1	TRINITY_DN17793_c0_g3_i2.path1	novel.3119
TRINITY_DN20815_c0_g2_i1.path2	Pepsico1_Contig1860.path1	Pepsico2_Contig6501.path1	TRINITY_DN71565_c0_g1_i1.path1			TRINITY_DN54314_c0_g1_i1.path1	novel.4363	TRINITY_DN79160_c0_g1_i1.path1
TRINITY_DN17801_c0_g1_i4.path1	TRINITY_DN47666_c0_g2_i3.path1	TRINITY_DN1201_c0_g1_i3.path1	TRINITY_DN3419_c0_g1_i1.path2			Pepsico2_Contig1800.path1	TRINITY_DN80_c0_g1_i1.path1	TRINITY_DN11282_c1_g2_i1.path1
Pepsico2_Contig12352.path1	Pepsico2_Contig6569.path1	TRINITY_DN49735_c0_g1_i1.path1	TRINITY_DN21323_c0_g2_i1.path1			Pepsico2_Contig7863.path1	Pepsico1_Contig1137.path1	TRINITY_DN35417_c0_g1_i3.path1
TRINITY_DN34348_c0_g2_i1.path2	novel.8144	TRINITY_DN6025_c0_g1_i12.path1	TRINITY_DN29950_c0_g1_i1.path1			novel.9823	novel.2764	novel.6949
Pepsico2_Contig4432.path1	TRINITY_DN17078_c0_g1_i1.path1	novel.2583	novel.9291			TRINITY_DN30268_c0_g5_i1.path1	novel.4023	TRINITY_DN626_c0_g3_i1.path2
TRINITY_DN26666_c0_g1_i1.path3	TRINITY_DN16908_c0_g1_i8.path1	TRINITY_DN55122_c0_g1_i1.path4	TRINITY_DN20412_c0_g3_i2.path3			TRINITY_DN45866_c0_g1_i1.path1	TRINITY_DN16495_c0_g1_i1.path2	Pepsico2_Contig7954.path1
novel.280	Pepsico2_Contig14690.path1	Pepsico2_Contig17684.path1	TRINITY_DN29717_c0_g3_i1.path3			novel.8116	novel.10141	TRINITY_DN2337_c0_g1_i6.path2
novel.9345	TRINITY_DN26672_c1_g2_i2.path1	Pepsico2_Contig6405.path1	TRINITY_DN41646_c0_g1_i2.path1			novel.4904	TRINITY_DN36941_c0_g1_i1.path1	TRINITY_DN15198_c0_g1_i2.path1
TRINITY_DN22019_c0_g1_i3.path2	Pepsico2_Contig19948.path1	TRINITY_DN37380_c0_g3_i1.path1	TRINITY_DN50535_c0_g4_i1.path1			TRINITY_DN89972_c0_g1_i1.path1	TRINITY_DN41724_c1_g1_i4.path1	novel.5248
TRINITY_DN30929_c0_g1_i2.path1	Pepsico2_Contig20569.path2	TRINITY_DN101247_c0_g1_i1.path1	TRINITY_DN110823_c0_g1_i1.path1			novel.2693	novel.2676	TRINITY_DN102365_c0_g1_i1.path1
TRINITY_DN19767_c0_g1_i3.path1	novel.8294	TRINITY_DN9687_c0_g1_i7.path1	TRINITY_DN8445_c0_g1_i4.path2			novel.5555	Pepsico2_Contig16890.path1	novel.5900
novel.732	TRINITY_DN112801_c0_g1_i1.path1	Pepsico2_Contig3314.path1	novel.2582			Pepsico2_Contig18163.path1	TRINITY_DN4576_c0_g1_i2.path1	novel.8833
TRINITY_DN8841_c0_g1_i1.path1	TRINITY_DN21095_c0_g1_i1.path1	TRINITY_DN10561_c0_g1_i1.path1	novel.5375			TRINITY_DN66377_c0_g1_i1.path1	TRINITY_DN10280_c0_g1_i1.path1	TRINITY_DN23043_c0_g1_i5.path1
novel.5235	novel.4320	Pepsico2_Contig20029.path3	novel.6950			TRINITY_DN37227_c0_g2_i2.path1	novel.10386	TRINITY_DN14129_c0_g1_i5.path2
Pepsico1_Contig219.path1	TRINITY_DN104985_c0_g1_i1.path1	TRINITY_DN12617_c0_g2_i5.path1	TRINITY_DN3161_c0_g1_i1.path2			TRINITY_DN37868_c0_g1_i1.path1	TRINITY_DN11406_c0_g1_i1.path1	novel.3694
novel.7712	TRINITY_DN7335_c0_g1_i7.path1	TRINITY_DN29717_c0_g3_i1.path3	TRINITY_DN19239_c0_g1_i1.path1			TRINITY_DN7075_c0_g1_i5.path1	TRINITY_DN13490_c0_g1_i5.path1	TRINITY_DN14904_c0_g1_i1.path2
TRINITY_DN29779_c1_g1_i1.path1	Pepsico2_Contig7382.path2	TRINITY_DN16433_c1_g1_i1.path1	novel.10101			novel.6297	novel.742	novel.828
TRINITY_DN13011_c0_g1_i1.path1	TRINITY_DN2562_c0_g1_i13.path1	Pepsico1_Contig2846.path1	TRINITY_DN8551_c1_g3_i1.path1			novel.3962	TRINITY_DN7223_c0_g1_i5.path1	Pepsico1_Contig6414.path4
Pepsico2_Contig7175.path1	Pepsico1_Contig5748.path2	TRINITY_DN19953_c0_g2_i1.path1	TRINITY_DN89765_c0_g1_i1.path1			TRINITY_DN7964_c0_g1_i2.path2	TRINITY_DN21333_c0_g2_i2.path1	TRINITY_DN22038_c0_g1_i2.path1
TRINITY_DN28710_c0_g1_i1.path1	TRINITY_DN8456_c1_g1_i1.path1	TRINITY_DN23109_c0_g1_i2.path2	TRINITY_DN49827_c0_g1_i1.path1			TRINITY_DN23972_c0_g1_i1.path2	novel.1010	TRINITY_DN17080_c0_g2_i1.path1
TRINITY_DN7589_c0_g2_i1.path3	TRINITY_DN1437_c1_g1_i1.path1	TRINITY_DN17463_c0_g1_i3.path2	TRINITY_DN23493_c0_g1_i1.path1			Pepsico2_Contig1658.path3	TRINITY_DN26141_c0_g2_i1.path1	TRINITY_DN15870_c0_g1_i3.path1
novel.5478	TRINITY_DN49793_c0_g1_i6.path1	novel.7633	novel.6675			TRINITY_DN59933_c0_g1_i1.path1	TRINITY_DN22203_c1_g1_i2.path1	novel.2937
novel.5118	TRINITY_DN6633_c0_g1_i5.path2	novel.4121	TRINITY_DN14541_c0_g1_i1.path2			novel.7927	TRINITY_DN16818_c0_g3_i1.path1	novel.3360
novel.9937	Pepsico2_Contig9370.path1	TRINITY_DN36993_c0_g1_i1.path1	TRINITY_DN40672_c0_g1_i1.path1			TRINITY_DN17711_c0_g1_i1.path1	TRINITY_DN40776_c0_g1_i1.path1	TRINITY_DN8830_c0_g1_i19.path2
novel.3076	TRINITY_DN79603_c0_g1_i1.path1	TRINITY_DN40672_c0_g1_i1.path2	TRINITY_DN36466_c0_g1_i1.path1			Pepsico2_Contig11328.path1	TRINITY_DN95487_c0_g1_i1.path1	TRINITY_DN10620_c0_g2_i1.path1
novel.1857	TRINITY_DN43352_c0_g1_i1.path1	TRINITY_DN11373_c1_g1_i12.path1	novel.1757			TRINITY_DN71520_c0_g1_i1.path1	TRINITY_DN21045_c1_g1_i2.path1	TRINITY_DN581_c4_g1_i3.path1
TRINITY_DN27817_c0_g1_i1.path1	TRINITY_DN18723_c0_g2_i1.path1	novel.5549	TRINITY_DN32584_c0_g1_i1.path1			TRINITY_DN8555_c0_g1_i8.path1	TRINITY_DN88881_c0_g1_i1.path1	TRINITY_DN13945_c0_g1_i6.path1
TRINITY_DN31317_c1_g1_i2.path1	Pepsico2_Contig3611.path1	TRINITY_DN41724_c1_g1_i4.path1	TRINITY_DN22584_c0_g3_i1.path1			Pepsico2_Contig6534.path1	TRINITY_DN34759_c0_g2_i1.path1	TRINITY_DN8365_c1_g1_i7.path1
TRINITY_DN90514_c0_g1_i1.path1	TRINITY_DN64662_c0_g1_i2.path1	Pepsico2_Contig8080.path1	TRINITY_DN25713_c0_g1_i1.path1			TRINITY_DN45040_c0_g2_i1.path2	Pepsico1_Contig2161.path1	novel.3043
Pepsico2_Contig18181.path1	TRINITY_DN99177_c0_g1_i1.path1	TRINITY_DN16572_c0_g2_i2.path2	Pepsico2_Contig9896.path1			Pepsico2_Contig19467.path1	Pepsico1_Contig6958.path2	TRINITY_DN24825_c0_g3_i1.path1
novel.8154	TRINITY_DN320_c2_g1_i1.path2	novel.3955	novel.4542			novel.8367	TRINITY_DN17519_c0_g1_i3.path1	novel.8498
TRINITY_DN48507_c0_g1_i1.path1	TRINITY_DN32533_c0_g2_i1.path1	novel.5614	novel.10304			novel.5243	TRINITY_DN28223_c0_g1_i1.path1	novel.1423
Pepsico2_Contig14785.path1	Pepsico1_Contig672.path2	TRINITY_DN7193_c0_g1_i2.path1	TRINITY_DN10477_c1_g2_i1.path2			TRINITY_DN25061_c0_g1_i2.path1	Pepsico2_Contig135.path1	Pepsico2_Contig4961.path1
TRINITY_DN24307_c0_g1_i1.path1	novel.4114	Pepsico2_Contig11149.path2	TRINITY_DN7585_c0_g2_i1.path1			TRINITY_DN103531_c0_g1_i1.path1	TRINITY_DN9890_c0_g1_i6.path1	TRINITY_DN25402_c0_g3_i1.path1
TRINITY_DN8456_c1_g1_i1.path1	TRINITY_DN9597_c0_g1_i4.path1	TRINITY_DN28712_c0_g1_i1.path1	novel.4317			Pepsico2_Contig4084.path1	TRINITY_DN94140_c0_g1_i1.path1	novel.3517
Pepsico2_Contig12261.path1	Pepsico1_Contig1027.path1	novel.6546	TRINITY_DN13781_c0_g1_i1.path1			TRINITY_DN1059_c0_g1_i4.path1	novel.2184	TRINITY_DN16433_c1_g1_i1.path1
TRINITY_DN13963_c0_g1_i1.path1	TRINITY_DN16991_c0_g1_i1.path1	TRINITY_DN54399_c0_g1_i1.path2	TRINITY_DN38392_c0_g1_i11.path1			TRINITY_DN977_c0_g1_i5.path1	TRINITY_DN36313_c0_g1_i12.path1	TRINITY_DN111502_c0_g1_i1.path1
TRINITY_DN15081_c1_g1_i1.path1	TRINITY_DN5293_c0_g1_i2.path2	Pepsico2_Contig19940.path1	TRINITY_DN29528_c0_g1_i1.path1			TRINITY_DN149_c0_g5_i1.path1	TRINITY_DN20414_c0_g2_i1.path1	TRINITY_DN88385_c0_g1_i1.path1
Pepsico1_Contig5497.path1	Pepsico2_Contig18101.path2	novel.8181	TRINITY_DN1201_c0_g1_i3.path1			TRINITY_DN20622_c0_g1_i4.path1	Pepsico2_Contig17684.path1	novel.6689
TRINITY_DN78641_c0_g1_i1.path1	novel.6364	TRINITY_DN26530_c1_g1_i1.path1	TRINITY_DN74032_c0_g1_i1.path1			Pepsico2_Contig12374.path1	Pepsico2_Contig17122.path2	TRINITY_DN25572_c0_g1_i1.path1
TRINITY_DN56622_c0_g1_i1.path1	TRINITY_DN19188_c0_g1_i2.path1	Pepsico1_Contig33380.path1	TRINITY_DN2450_c1_g2_i1.path1			Pepsico2_Contig18182.path1	TRINITY_DN11328_c0_g1_i1.path1	TRINITY_DN32918_c0_g3_i1.path1
TRINITY_DN113_c1_g1_i1.path1	novel.4951	TRINITY_DN35875_c0_g1_i1.path2	Pepsico2_Contig10648.path1			novel.1990	TRINITY_DN12659_c0_g1_i5.path1	Pepsico2_Contig14530.path1
Pepsico2_Contig14392.path1	TRINITY_DN10612_c0_g1_i14.path1	TRINITY_DN26343_c0_g2_i1.path3	TRINITY_DN78952_c0_g1_i1.path1			TRINITY_DN16176_c0_g1_i3.path1	TRINITY_DN8830_c0_g1_i19.path3	TRINITY_DN16151_c0_g5_i1.path1
TRINITY_DN16257_c1_g1_i5.path1	TRINITY_DN35718_c0_g3_i2.path1	novel.7712	TRINITY_DN47281_c0_g1_i1.path1			Pepsico1_Contig501.path1	Pepsico1_Contig2161.path2	TRINITY_DN29964_c0_g3_i1.path1
Pepsico2_Contig1185.path2	novel.9836	TRINITY_DN3419_c0_g1_i1.path1	TRINITY_DN6573_c0_g1_i4.path1			novel.6460	novel.8801	TRINITY_DN88734_c0_g1_i1.path1
Pepsico2_Contig3750.path2	TRINITY_DN71565_c0_g1_i1.path1	Pepsico2_Contig11242.path1	TRINITY_DN17542_c0_g1_i5.path1			TRINITY_DN14489_c0_g1_i1.path1	TRINITY_DN12215_c0_g1_i3.path1	Pepsico1_Contig6573.path1
TRINITY_DN5444_c0_g1_i2.path2	TRINITY_DN44150_c0_g2_i1.path1	TRINITY_DN62134_c2_g1_i1.path1	TRINITY_DN17432_c0_g1_i2.path1			novel.2742	TRINITY_DN5144_c0_g1_i8.path2	TRINITY_DN6751_c0_g1_i5.path1
Pepsico1_Contig66.path1	TRINITY_DN22203_c1_g1_i2.path1	TRINITY_DN21106_c0_g1_i1.path3	TRINITY_DN1167_c0_g2_i1.path1			Pepsico2_Contig18276.path1	novel.9442	novel.399
TRINITY_DN16157_c0_g2_i2.path1	Pepsico2_Contig14347.path1	TRINITY_DN23043_c0_g1_i5.path1	Pepsico2_Contig4425.path1			novel.307	novel.1888	TRINITY_DN2809_c0_g1_i14.path1
TRINITY_DN10853_c0_g1_i1.path1	Pepsico2_Contig20227.path1	TRINITY_DN35789_c0_g1_i1.path2	Pepsico2_Contig19467.path1			TRINITY_DN51163_c0_g1_i1.path1	novel.7423	TRINITY_DN3161_c0_g1_i1.path1
TRINITY_DN16421_c0_g1_i9.path3	Pepsico2_Contig3750.path2	TRINITY_DN26427_c0_g1_i1.path1	TRINITY_DN106725_c0_g1_i1.path1			TRINITY_DN23612_c0_g1_i2.path1	TRINITY_DN3174_c1_g1_i2.path1	TRINITY_DN14238_c1_g1_i1.path1
TRINITY_DN105305_c0_g1_i1.path1	TRINITY_DN78361_c0_g1_i1.path1	TRINITY_DN31456_c0_g2_i4.path3	TRINITY_DN14111_c0_g1_i1.path1			novel.6507	TRINITY_DN27062_c0_g1_i1.path1	TRINITY_DN24307_c0_g1_i1.path1
TRINITY_DN115764_c0_g1_i1.path1	TRINITY_DN46290_c0_g1_i1.path1	novel.4607	TRINITY_DN92652_c0_g1_i1.path3			Pepsico2_Contig2646.path1	TRINITY_DN62409_c0_g1_i1.path1	Pepsico2_Contig19795.path2
TRINITY_DN51609_c0_g1_i1.path1	TRINITY_DN14014_c1_g1_i1.path1	TRINITY_DN276_c1_g1_i1.path1	TRINITY_DN41654_c0_g1_i1.path1			TRINITY_DN66089_c0_g1_i1.path1	Pepsico2_Contig20779.path1	Pepsico2_Contig11149.path2
TRINITY_DN12871_c0_g1_i4.path2	TRINITY_DN16801_c1_g3_i1.path1	TRINITY_DN2173_c0_g1_i1.path1	TRINITY_DN1437_c1_g1_i1.path1			TRINITY_DN2210_c0_g2_i3.path1	Pepsico2_Contig17305.path4	Pepsico1_Contig3669.path1
novel.2760	TRINITY_DN11478_c0_g1_i4.path1	TRINITY_DN78066_c0_g1_i1.path1	TRINITY_DN3075_c1_g1_i2.path2			novel.3245	TRINITY_DN55852_c0_g1_i1.path1	TRINITY_DN78066_c0_g1_i1.path1
TRINITY_DN13945_c0_g1_i6.path1	Pepsico2_Contig12692.path4	TRINITY_DN1779_c0_g1_i10.path1	TRINITY_DN12337_c0_g2_i2.path1			TRINITY_DN35329_c0_g1_i1.path2	TRINITY_DN22038_c0_g1_i2.path1	TRINITY_DN10506_c1_g1_i2.path1
TRINITY_DN12381_c0_g1_i1.path1	TRINITY_DN11687_c0_g1_i1.path1	TRINITY_DN36770_c2_g1_i1.path1	novel.7183			TRINITY_DN23468_c0_g1_i2.path2	TRINITY_DN6989_c0_g1_i1.path1	Pepsico2_Contig18009.path1
novel.5137	novel.849	novel.7193	novel.4905			TRINITY_DN6856_c0_g1_i5.path1	Pepsico2_Contig15300.path1	novel.8131
Pepsico2_Contig1227.path1	TRINITY_DN16858_c0_g1_i2.path1	TRINITY_DN14111_c0_g1_i1.path1	TRINITY_DN28946_c0_g1_i2.path2			TRINITY_DN81327_c0_g1_i1.path1	novel.3712	TRINITY_DN99626_c0_g1_i1.path1
TRINITY_DN94969_c0_g1_i1.path1	Pepsico2_Contig13017.path4	TRINITY_DN24045_c0_g1_i1.path1	TRINITY_DN5990_c0_g1_i19.path1			TRINITY_DN1569_c2_g2_i1.path1	novel.2758	TRINITY_DN26120_c0_g1_i1.path2
TRINITY_DN38655_c0_g1_i1.path1	Pepsico2_Contig6340.path1	novel.2212	TRINITY_DN47812_c0_g1_i2.path1			TRINITY_DN43716_c0_g1_i1.path1	Pepsico2_Contig13612.path1	TRINITY_DN42283_c0_g1_i1.path1
TRINITY_DN42474_c0_g1_i1.path1	Pepsico2_Contig13304.path1	TRINITY_DN648_c1_g1_i8.path1	TRINITY_DN10066_c1_g2_i1.path1			novel.6131	TRINITY_DN11509_c0_g1_i7.path1	TRINITY_DN9701_c0_g1_i1.path2
TRINITY_DN31685_c0_g1_i1.path1	Pepsico2_Contig12375.path1	TRINITY_DN32102_c0_g2_i2.path2	novel.175			TRINITY_DN106735_c0_g1_i1.path1	novel.4821	TRINITY_DN29531_c0_g1_i1.path1
TRINITY_DN12808_c0_g1_i3.path1	TRINITY_DN52160_c0_g1_i1.path1	novel.7472	TRINITY_DN4979_c0_g2_i5.path1			TRINITY_DN10890_c0_g2_i1.path1	TRINITY_DN12536_c0_g1_i4.path2	novel.4404
novel.4904	TRINITY_DN32994_c0_g1_i1.path1	TRINITY_DN5195_c0_g1_i1.path3	TRINITY_DN14012_c0_g1_i1.path2			TRINITY_DN94140_c0_g1_i1.path2	TRINITY_DN13963_c0_g1_i1.path1	TRINITY_DN29334_c0_g1_i1.path1
novel.9331	novel.2920	TRINITY_DN52469_c0_g1_i1.path1	TRINITY_DN110828_c0_g1_i1.path1			TRINITY_DN17774_c0_g2_i1.path1	TRINITY_DN63001_c0_g1_i1.path1	novel.5635
Pepsico2_Contig11432.path1	Pepsico2_Contig3549.path1	TRINITY_DN28819_c0_g1_i1.path1	TRINITY_DN34348_c0_g2_i1.path2			TRINITY_DN18844_c0_g1_i1.path1	Pepsico2_Contig12826.path1	TRINITY_DN4613_c0_g1_i2.path1
TRINITY_DN1917_c0_g1_i1.path1	TRINITY_DN13925_c1_g1_i1.path1	TRINITY_DN4827_c1_g1_i1.path2	TRINITY_DN20966_c0_g5_i1.path1			Pepsico2_Contig19811.path1	TRINITY_DN14779_c0_g2_i1.path1	TRINITY_DN34205_c0_g1_i1.path1
TRINITY_DN44035_c0_g1_i2.path1	novel.2366	Pepsico2_Contig2460.path1	Pepsico1_Contig6775.path1			TRINITY_DN17759_c0_g2_i1.path1	TRINITY_DN54354_c0_g1_i1.path1	novel.9836
novel.7052	TRINITY_DN14238_c1_g1_i1.path1	TRINITY_DN6139_c0_g2_i2.path1	TRINITY_DN23337_c0_g1_i1.path2			Pepsico1_Contig5974.path1	TRINITY_DN15011_c0_g1_i1.path1	TRINITY_DN60733_c0_g1_i1.path1
TRINITY_DN59441_c0_g1_i2.path3	TRINITY_DN20691_c0_g2_i1.path2	TRINITY_DN65824_c0_g1_i1.path1	TRINITY_DN65824_c0_g1_i1.path1			TRINITY_DN14061_c0_g3_i2.path1	TRINITY_DN33625_c0_g1_i1.path1	novel.2296
TRINITY_DN12040_c0_g1_i15.path2	novel.6575	TRINITY_DN19239_c0_g1_i1.path1	novel.446			TRINITY_DN79814_c0_g1_i1.path1	TRINITY_DN16151_c0_g5_i1.path1	Pepsico2_Contig12802.path1
TRINITY_DN5321_c0_g1_i10.path1	TRINITY_DN38392_c0_g1_i11.path1	TRINITY_DN59339_c0_g1_i2.path1	novel.6612			novel.4058	TRINITY_DN51163_c0_g1_i1.path1	Pepsico2_Contig17563.path1
TRINITY_DN38578_c0_g4_i1.path2	TRINITY_DN22549_c0_g2_i1.path1	TRINITY_DN9201_c0_g1_i1.path1	Pepsico2_Contig7283.path1			TRINITY_DN26093_c0_g1_i2.path1	novel.7290	TRINITY_DN29095_c0_g2_i1.path1
TRINITY_DN16567_c0_g1_i1.path1	TRINITY_DN32610_c0_g4_i2.path1	novel.224	Pepsico2_Contig10721.path1			TRINITY_DN15900_c0_g1_i1.path1	TRINITY_DN17331_c0_g1_i1.path1	Pepsico2_Contig6539.path1
Pepsico2_Contig8852.path1	Pepsico1_Contig2851.path1	TRINITY_DN36559_c0_g1_i1.path2	TRINITY_DN51140_c0_g1_i1.path1			TRINITY_DN15500_c0_g3_i1.path1	TRINITY_DN89972_c0_g1_i1.path1	novel.4662
novel.10536	TRINITY_DN11406_c0_g1_i1.path1	TRINITY_DN20757_c0_g1_i1.path1	Pepsico1_Contig655.path1			TRINITY_DN37320_c0_g1_i1.path1	TRINITY_DN31120_c0_g1_i2.path1	novel.4947
novel.5037	TRINITY_DN16929_c1_g1_i4.path1	TRINITY_DN3070_c1_g1_i2.path2	TRINITY_DN88720_c0_g1_i1.path1			TRINITY_DN99439_c0_g1_i1.path1	TRINITY_DN34205_c0_g1_i1.path3	TRINITY_DN88223_c0_g1_i1.path1
TRINITY_DN16937_c0_g1_i1.path2	novel.8487	novel.9855	Pepsico2_Contig18178.path1			TRINITY_DN31408_c0_g1_i2.path1	TRINITY_DN15559_c0_g3_i1.path1	TRINITY_DN3707_c0_g1_i10.path2
TRINITY_DN35147_c1_g1_i1.path1	novel.4349	TRINITY_DN8709_c0_g1_i3.path1	TRINITY_DN108784_c0_g1_i1.path1			Pepsico1_Contig22443.path2	novel.4398	TRINITY_DN2644_c1_g1_i2.path1
TRINITY_DN26493_c1_g1_i1.path1	novel.9277	novel.4196	TRINITY_DN44237_c0_g1_i1.path1			TRINITY_DN98099_c0_g1_i1.path1	TRINITY_DN32533_c0_g1_i1.path2	TRINITY_DN33920_c1_g1_i1.path1
novel.6254	novel.5410	TRINITY_DN8969_c0_g1_i5.path2	TRINITY_DN31147_c0_g1_i1.path1			TRINITY_DN16151_c0_g5_i1.path1	TRINITY_DN2210_c0_g1_i2.path1	TRINITY_DN15885_c0_g1_i1.path1
TRINITY_DN76026_c0_g1_i1.path1	TRINITY_DN17687_c0_g2_i2.path1	Pepsico2_Contig13457.path1	novel.3721			TRINITY_DN1326_c0_g1_i3.path1	novel.9466	TRINITY_DN21405_c1_g1_i7.path1
TRINITY_DN28896_c0_g1_i1.path1	Pepsico2_Contig11242.path1	Pepsico1_Contig5249.path1	Pepsico2_Contig13697.path1			TRINITY_DN38122_c0_g1_i1.path1	Pepsico2_Contig19525.path1	novel.2366
Pepsico2_Contig14747.path1	Pepsico1_Contig35521.path1	novel.3581	TRINITY_DN32075_c0_g3_i1.path1			TRINITY_DN32349_c0_g1_i2.path1	TRINITY_DN18844_c0_g1_i1.path1	TRINITY_DN5199_c0_g2_i1.path1
novel.452	novel.3663	TRINITY_DN78921_c0_g1_i1.path1	TRINITY_DN13964_c0_g2_i1.path1			Pepsico1_Contig2049.path1	TRINITY_DN553_c0_g3_i1.path1	TRINITY_DN27316_c0_g1_i2.path2
TRINITY_DN21624_c0_g1_i1.path1	TRINITY_DN9633_c1_g1_i3.path1	TRINITY_DN103453_c0_g1_i1.path1	novel.10001			TRINITY_DN43817_c0_g1_i1.path1	TRINITY_DN78446_c0_g1_i1.path1	Pepsico1_Contig892.path2
Pepsico2_Contig7794.path1	Pepsico1_Contig32727.path1	Pepsico2_Contig20778.path1	TRINITY_DN15011_c0_g1_i1.path1			TRINITY_DN17805_c1_g1_i1.path1	TRINITY_DN20889_c1_g1_i1.path1	TRINITY_DN11128_c0_g1_i8.path1
TRINITY_DN9971_c0_g1_i1.path1	TRINITY_DN7816_c0_g1_i1.path2	TRINITY_DN18117_c0_g1_i3.path3	TRINITY_DN10840_c1_g1_i1.path1			Pepsico1_Contig882.path1	novel.2498	TRINITY_DN11349_c0_g1_i2.path2
TRINITY_DN36119_c0_g1_i1.path1	TRINITY_DN21860_c0_g3_i2.path1	Pepsico2_Contig589.path2	novel.1788			TRINITY_DN18668_c0_g3_i1.path1	TRINITY_DN90964_c0_g1_i1.path1	TRINITY_DN9225_c0_g1_i1.path1
novel.7891	novel.6098	TRINITY_DN10178_c0_g2_i5.path1	TRINITY_DN9426_c0_g1_i3.path1			TRINITY_DN33623_c0_g1_i3.path1	TRINITY_DN249_c0_g3_i1.path1	TRINITY_DN20966_c0_g5_i1.path1
TRINITY_DN49608_c0_g1_i1.path1	TRINITY_DN27140_c0_g1_i1.path1	Pepsico2_Contig16029.path1	TRINITY_DN17858_c0_g1_i4.path1			TRINITY_DN26708_c0_g1_i1.path1	TRINITY_DN70882_c0_g1_i1.path1	Pepsico2_Contig18257.path1
Pepsico2_Contig9913.path1	TRINITY_DN4050_c1_g1_i10.path1	novel.4541	TRINITY_DN26636_c0_g2_i3.path1			TRINITY_DN7371_c2_g1_i1.path1	TRINITY_DN38725_c0_g1_i2.path1	TRINITY_DN14278_c0_g1_i1.path1
TRINITY_DN37339_c0_g1_i2.path1	TRINITY_DN17674_c0_g1_i2.path1	TRINITY_DN26200_c0_g1_i1.path1	TRINITY_DN88223_c0_g1_i1.path1			novel.4325	Pepsico2_Contig2528.path1	TRINITY_DN4542_c0_g1_i3.path2
novel.9599	TRINITY_DN15185_c0_g3_i5.path1	TRINITY_DN22621_c0_g1_i1.path1	TRINITY_DN35942_c0_g1_i1.path2			TRINITY_DN38578_c0_g4_i1.path2	TRINITY_DN7127_c0_g2_i6.path2	Pepsico1_Contig7138.path1
novel.8443	novel.5681	TRINITY_DN19066_c0_g2_i1.path1	Pepsico1_Contig34053.path2			TRINITY_DN27247_c0_g1_i1.path1	TRINITY_DN60146_c0_g1_i1.path1	Pepsico2_Contig5996.path2
TRINITY_DN16868_c0_g1_i1.path1	TRINITY_DN23109_c0_g1_i2.path2	TRINITY_DN108802_c0_g1_i1.path1	novel.7193			novel.5996	novel.8944	TRINITY_DN3212_c0_g1_i1.path1
TRINITY_DN91196_c0_g1_i1.path1	novel.5334	novel.4718	TRINITY_DN4502_c2_g1_i1.path1			TRINITY_DN108540_c0_g1_i1.path1	TRINITY_DN25103_c0_g1_i1.path1	Pepsico1_Contig38616.path1
TRINITY_DN6228_c1_g1_i2.path1	TRINITY_DN2977_c0_g1_i11.path1	TRINITY_DN18524_c0_g1_i1.path1	TRINITY_DN14212_c0_g1_i1.path2			TRINITY_DN18524_c0_g1_i1.path1	TRINITY_DN15198_c0_g2_i2.path2	TRINITY_DN26545_c0_g1_i1.path1
Pepsico2_Contig17628.path1	TRINITY_DN10620_c0_g3_i1.path1	novel.5393	TRINITY_DN18437_c0_g1_i2.path1			novel.6082	TRINITY_DN97541_c0_g1_i1.path1	Pepsico2_Contig6897.path1
TRINITY_DN23200_c0_g1_i2.path1	novel.3752	novel.4460	TRINITY_DN25103_c0_g1_i1.path1			TRINITY_DN33238_c0_g1_i1.path1	TRINITY_DN14533_c0_g1_i4.path2	TRINITY_DN9750_c0_g1_i6.path1
TRINITY_DN21120_c0_g1_i2.path1	Pepsico2_Contig17203.path1	Pepsico1_Contig6414.path4	TRINITY_DN14278_c0_g1_i1.path1			novel.9013	TRINITY_DN21860_c0_g3_i2.path3	Pepsico1_Contig6523.path1
Pepsico1_Contig2851.path1	TRINITY_DN78446_c0_g1_i1.path1	Pepsico2_Contig14508.path2	novel.4129			TRINITY_DN18448_c0_g1_i2.path2	Pepsico1_Contig1025.path1	TRINITY_DN61247_c0_g1_i1.path1
Pepsico2_Contig18257.path1	Pepsico2_Contig13220.path1	TRINITY_DN39623_c0_g1_i1.path2	Pepsico1_Contig6014.path1			TRINITY_DN8914_c0_g2_i4.path2	novel.2332	novel.2137
TRINITY_DN55852_c0_g1_i1.path1	Pepsico2_Contig6525.path1	TRINITY_DN88207_c0_g1_i1.path1	Pepsico1_Contig880.path1			TRINITY_DN27766_c1_g2_i1.path1	TRINITY_DN6342_c0_g2_i15.path1	Pepsico1_Contig1321.path2
Pepsico1_Contig6100.path1	TRINITY_DN29405_c0_g1_i1.path1	Pepsico1_Contig6014.path1	Pepsico2_Contig8152.path1			TRINITY_DN43199_c0_g1_i1.path2	Pepsico1_Contig6934.path1	Pepsico2_Contig14707.path1
TRINITY_DN69825_c0_g1_i1.path1	TRINITY_DN73927_c0_g1_i1.path1	Pepsico1_Contig814.path1	TRINITY_DN78921_c0_g1_i1.path1			TRINITY_DN59441_c0_g1_i2.path1	Pepsico2_Contig20384.path1	TRINITY_DN96619_c0_g1_i1.path1
TRINITY_DN60733_c0_g1_i1.path1	TRINITY_DN103377_c0_g1_i1.path1	novel.751	TRINITY_DN94140_c0_g1_i1.path2			TRINITY_DN1959_c0_g1_i1.path1	TRINITY_DN33305_c0_g3_i1.path1	novel.5006
	TRINITY_DN23109_c0_g1_i2.path1	novel.8249	novel.5480			TRINITY_DN97554_c0_g1_i1.path1	novel.6923	Pepsico1_Contig7006.path1
	TRINITY_DN1347_c1_g1_i1.path1	novel.6691	TRINITY_DN12004_c0_g1_i1.path1			novel.455	Pepsico2_Contig638.path2	TRINITY_DN96412_c0_g1_i1.path1
	TRINITY_DN4576_c0_g1_i2.path1	TRINITY_DN33047_c0_g3_i1.path1	TRINITY_DN16238_c0_g1_i5.path1			TRINITY_DN39219_c0_g1_i1.path1	TRINITY_DN536_c0_g1_i1.path1	TRINITY_DN90434_c0_g1_i1.path1
	Pepsico2_Contig19479.path1	TRINITY_DN8456_c1_g1_i1.path1	TRINITY_DN3855_c0_g4_i1.path1			TRINITY_DN18135_c0_g1_i1.path2	TRINITY_DN38578_c0_g4_i1.path2	novel.504
	Pepsico2_Contig19104.path1	TRINITY_DN18153_c0_g2_i1.path4	TRINITY_DN16151_c0_g5_i1.path1			TRINITY_DN23596_c0_g1_i3.path1	novel.399	TRINITY_DN10240_c0_g1_i12.path2
	Pepsico2_Contig20063.path1	TRINITY_DN9030_c0_g4_i1.path1	TRINITY_DN32113_c0_g1_i1.path1			TRINITY_DN92367_c0_g1_i1.path1	TRINITY_DN19900_c0_g2_i1.path1	TRINITY_DN7061_c0_g1_i3.path1
	TRINITY_DN10178_c0_g1_i1.path1	novel.1446	TRINITY_DN2389_c0_g2_i2.path1			TRINITY_DN9693_c0_g1_i7.path1	TRINITY_DN50606_c0_g1_i1.path1	TRINITY_DN25998_c0_g1_i2.path1
	Pepsico2_Contig17803.path2	TRINITY_DN8945_c0_g1_i3.path1	TRINITY_DN6451_c0_g1_i1.path1			TRINITY_DN33916_c0_g1_i1.path1	TRINITY_DN27316_c0_g1_i2.path2	novel.1958
	TRINITY_DN26427_c0_g1_i1.path1	TRINITY_DN32743_c0_g1_i1.path2	TRINITY_DN21860_c1_g1_i1.path1			TRINITY_DN69448_c0_g1_i1.path1	TRINITY_DN24342_c0_g2_i1.path1	TRINITY_DN581_c1_g1_i17.path1
	Pepsico2_Contig17383.path1	TRINITY_DN23813_c0_g1_i3.path1	TRINITY_DN26343_c0_g1_i2.path3			TRINITY_DN16433_c0_g1_i7.path1	TRINITY_DN31076_c0_g1_i4.path1	novel.6472
	TRINITY_DN966_c0_g2_i3.path1	novel.6673	TRINITY_DN75397_c0_g1_i1.path1			TRINITY_DN23438_c0_g1_i5.path1	novel.5930	novel.4447
	novel.822	Pepsico1_Contig3978.path2	TRINITY_DN9157_c0_g4_i2.path1			novel.657	TRINITY_DN53806_c0_g1_i1.path2	TRINITY_DN26805_c1_g1_i1.path1
	novel.4536	Pepsico1_Contig1334.path1	TRINITY_DN35875_c0_g1_i1.path2			TRINITY_DN47635_c0_g1_i1.path1	novel.8131	TRINITY_DN21488_c0_g2_i1.path1
	Pepsico1_Contig21250.path1	TRINITY_DN13000_c0_g2_i2.path1	TRINITY_DN39682_c0_g1_i1.path1			TRINITY_DN31162_c0_g2_i2.path1	Pepsico2_Contig243.path1	novel.5315
	TRINITY_DN5461_c0_g1_i11.path1	TRINITY_DN30446_c0_g1_i1.path2	TRINITY_DN18829_c1_g1_i1.path1			TRINITY_DN13219_c0_g1_i1.path1	TRINITY_DN83476_c0_g1_i1.path1	novel.9893
	TRINITY_DN6460_c1_g2_i1.path2	TRINITY_DN14202_c3_g1_i1.path1	TRINITY_DN44073_c0_g1_i1.path1			novel.9721	TRINITY_DN29001_c0_g1_i1.path2	TRINITY_DN6882_c1_g1_i1.path1
	TRINITY_DN7589_c0_g2_i1.path3	Pepsico2_Contig20023.path1	TRINITY_DN23717_c0_g1_i4.path3			Pepsico2_Contig16082.path1	TRINITY_DN33151_c0_g1_i1.path1	TRINITY_DN52469_c0_g1_i1.path1
	TRINITY_DN106726_c0_g1_i1.path1	novel.2238	Pepsico1_Contig31861.path1			novel.7371	Pepsico2_Contig2646.path1	TRINITY_DN1916_c1_g1_i1.path1
	TRINITY_DN36881_c0_g3_i1.path1	novel.5303	novel.2288			Pepsico2_Contig18357.path1	TRINITY_DN34417_c0_g2_i1.path1	Pepsico2_Contig12122.path1
	novel.3041	TRINITY_DN17729_c0_g1_i1.path1	novel.2763			TRINITY_DN11717_c0_g1_i1.path2	novel.2234	TRINITY_DN29531_c0_g1_i1.path2
	TRINITY_DN2977_c0_g1_i11.path2	Pepsico2_Contig13188.path1	Pepsico2_Contig17550.path2			TRINITY_DN23984_c0_g1_i1.path1	Pepsico2_Contig15185.path1	TRINITY_DN15878_c0_g1_i6.path1
	TRINITY_DN15949_c0_g1_i1.path1	TRINITY_DN51140_c0_g1_i1.path1	TRINITY_DN47408_c0_g1_i1.path1			TRINITY_DN54627_c0_g1_i1.path1	Pepsico2_Contig11043.path1	TRINITY_DN19953_c0_g1_i3.path1
	TRINITY_DN4614_c0_g1_i3.path1	Pepsico1_Contig27781.path2	TRINITY_DN69362_c0_g1_i1.path1			TRINITY_DN28064_c0_g2_i2.path1	TRINITY_DN25998_c0_g1_i2.path1	novel.661
	novel.7472	novel.8171	TRINITY_DN581_c1_g1_i17.path1			TRINITY_DN99626_c0_g1_i1.path1	Pepsico2_Contig648.path1	novel.3381
	TRINITY_DN8751_c0_g1_i3.path1	novel.10107	TRINITY_DN44492_c0_g1_i1.path1			TRINITY_DN107367_c0_g1_i1.path1	novel.2124	TRINITY_DN739_c0_g1_i2.path1
	TRINITY_DN12617_c0_g2_i5.path1	TRINITY_DN94140_c0_g1_i1.path2	TRINITY_DN97555_c0_g1_i1.path1			TRINITY_DN16319_c0_g1_i9.path1	TRINITY_DN16421_c0_g1_i9.path3	novel.7491
	Pepsico1_Contig24518.path1	TRINITY_DN43320_c0_g1_i1.path1	novel.4885			Pepsico2_Contig17975.path1	TRINITY_DN36993_c0_g1_i1.path1	TRINITY_DN58751_c0_g1_i1.path1
	TRINITY_DN5293_c0_g1_i2.path1	Pepsico2_Contig7283.path1	Pepsico2_Contig8190.path2			TRINITY_DN49457_c0_g1_i4.path1	TRINITY_DN90109_c0_g1_i1.path1	Pepsico2_Contig15246.path1
	novel.5301	TRINITY_DN36003_c0_g1_i1.path1	TRINITY_DN99551_c0_g1_i1.path1			TRINITY_DN35050_c0_g1_i1.path1	TRINITY_DN50089_c0_g1_i4.path1	TRINITY_DN97971_c0_g1_i1.path1
	TRINITY_DN17793_c0_g3_i2.path2	TRINITY_DN3126_c0_g1_i2.path1	novel.7204			TRINITY_DN23526_c0_g1_i1.path1	Pepsico2_Contig8430.path1	novel.4687
	TRINITY_DN47679_c0_g1_i1.path1	TRINITY_DN739_c0_g1_i2.path1	Pepsico2_Contig883.path1			novel.4984	Pepsico1_Contig195.path1	TRINITY_DN87482_c0_g1_i1.path1
	Pepsico2_Contig2625.path1	TRINITY_DN22733_c1_g1_i3.path1	TRINITY_DN18448_c0_g1_i2.path3			TRINITY_DN22677_c0_g2_i1.path2	Pepsico2_Contig3317.path1	TRINITY_DN15198_c0_g2_i2.path2
	Pepsico2_Contig14412.path3	TRINITY_DN106959_c0_g1_i1.path1	TRINITY_DN93767_c0_g1_i1.path1			novel.9937	TRINITY_DN56621_c0_g2_i1.path1	TRINITY_DN12633_c0_g1_i2.path1
	novel.2124	TRINITY_DN5707_c0_g1_i2.path3	TRINITY_DN55872_c0_g1_i1.path1			TRINITY_DN43074_c0_g2_i1.path1	Pepsico2_Contig930.path1	Pepsico1_Contig2398.path1
	Pepsico2_Contig6015.path1	TRINITY_DN42793_c0_g2_i1.path1	Pepsico1_Contig2049.path2			TRINITY_DN10591_c0_g1_i1.path2	TRINITY_DN25402_c0_g3_i1.path1	TRINITY_DN102402_c0_g1_i1.path1
	TRINITY_DN20994_c0_g1_i1.path2	TRINITY_DN25186_c0_g1_i1.path2	novel.8614			Pepsico1_Contig2765.path1	novel.1640	novel.2758
	Pepsico2_Contig19530.path1	TRINITY_DN32075_c0_g5_i3.path1	TRINITY_DN47935_c0_g1_i2.path1			TRINITY_DN6144_c0_g2_i2.path1	TRINITY_DN743_c0_g1_i3.path2	TRINITY_DN4979_c0_g2_i5.path1
	Pepsico2_Contig19854.path2	novel.1312	novel.3777			TRINITY_DN13237_c0_g1_i10.path1	TRINITY_DN16589_c0_g3_i3.path1	TRINITY_DN39153_c0_g1_i1.path1
	Pepsico2_Contig19837.path1	Pepsico2_Contig10893.path2	TRINITY_DN6488_c0_g1_i1.path3			TRINITY_DN70056_c0_g1_i1.path1	novel.5478	TRINITY_DN16599_c0_g1_i1.path1
	Pepsico1_Contig2203.path1	novel.8149	TRINITY_DN6139_c0_g2_i2.path1			TRINITY_DN5321_c0_g1_i10.path2	TRINITY_DN3161_c0_g1_i1.path2	Pepsico2_Contig17383.path1
	TRINITY_DN57726_c0_g1_i1.path1	TRINITY_DN32500_c0_g1_i1.path2	TRINITY_DN17359_c0_g1_i1.path1			TRINITY_DN88682_c0_g1_i1.path1	TRINITY_DN37227_c0_g2_i2.path1	TRINITY_DN39682_c0_g1_i1.path1
	TRINITY_DN1982_c1_g1_i3.path1	Pepsico1_Contig3724.path2	TRINITY_DN64836_c0_g1_i1.path1			novel.1480	TRINITY_DN21421_c0_g1_i1.path2	TRINITY_DN7311_c0_g1_i1.path1
	TRINITY_DN3075_c1_g1_i2.path2	novel.748	novel.6722			novel.5422	Pepsico2_Contig3671.path1	TRINITY_DN35164_c0_g1_i1.path1
	novel.3835	novel.1554	TRINITY_DN27750_c0_g1_i2.path1			novel.9649	TRINITY_DN14268_c0_g1_i3.path1	TRINITY_DN35_c0_g2_i1.path1
	TRINITY_DN26577_c0_g1_i1.path1	TRINITY_DN5990_c0_g1_i19.path1	Pepsico2_Contig9996.path1			novel.6121	TRINITY_DN39030_c0_g1_i2.path3	TRINITY_DN14680_c0_g3_i1.path1
	Pepsico2_Contig9259.path1	Pepsico2_Contig2300.path1	Pepsico2_Contig6486.path1			TRINITY_DN80128_c0_g1_i1.path1	novel.7507	novel.6836
	TRINITY_DN6451_c0_g1_i1.path1	novel.5635	TRINITY_DN22203_c1_g1_i2.path2			novel.7309	TRINITY_DN15878_c0_g1_i6.path2	Pepsico2_Contig19940.path1
	TRINITY_DN21323_c1_g2_i1.path1	Pepsico2_Contig13147.path1	TRINITY_DN89953_c0_g1_i1.path1			Pepsico2_Contig13612.path1	novel.5218	TRINITY_DN14321_c0_g1_i1.path2
	TRINITY_DN11768_c0_g1_i1.path1	novel.5315	TRINITY_DN21106_c0_g1_i1.path3			TRINITY_DN7464_c0_g1_i4.path1	TRINITY_DN38196_c0_g1_i1.path1	TRINITY_DN9568_c0_g1_i5.path1
	novel.8182	novel.2953	novel.9616			novel.1564	TRINITY_DN43227_c1_g1_i2.path1	Pepsico1_Contig5817.path1
	Pepsico1_Contig655.path1	novel.6460	Pepsico2_Contig9507.path2			novel.2259	Pepsico2_Contig17968.path1	TRINITY_DN101432_c0_g1_i1.path1
	TRINITY_DN31332_c0_g1_i2.path1	TRINITY_DN3664_c0_g3_i1.path1	novel.2423			TRINITY_DN42793_c0_g1_i1.path1	TRINITY_DN18448_c0_g1_i2.path1	novel.7701
	TRINITY_DN93760_c0_g1_i1.path1	TRINITY_DN25061_c0_g2_i2.path1	TRINITY_DN19306_c0_g1_i4.path1			Pepsico2_Contig6858.path1	TRINITY_DN13166_c1_g1_i1.path1	Pepsico1_Contig1783.path1
	novel.2463	novel.2096	Pepsico2_Contig14974.path1			TRINITY_DN3072_c0_g2_i1.path1	novel.101	novel.2021
	Pepsico1_Contig5249.path1	TRINITY_DN82075_c0_g1_i1.path1	TRINITY_DN22203_c1_g1_i2.path1			TRINITY_DN99485_c0_g1_i1.path1	Pepsico2_Contig1800.path1	Pepsico2_Contig243.path1
	Pepsico2_Contig7382.path1	novel.8536	TRINITY_DN973_c0_g1_i3.path1			TRINITY_DN66713_c0_g1_i1.path1	novel.2581	TRINITY_DN10932_c1_g1_i1.path2
	TRINITY_DN25186_c0_g1_i1.path2	TRINITY_DN58659_c0_g1_i1.path1	Pepsico2_Contig14412.path3			TRINITY_DN8445_c0_g1_i4.path1	novel.4339	novel.6297
	Pepsico2_Contig20718.path1	TRINITY_DN47408_c0_g1_i1.path2	TRINITY_DN27252_c0_g1_i1.path1			TRINITY_DN14904_c0_g1_i1.path1	TRINITY_DN11477_c0_g1_i7.path1	TRINITY_DN17301_c0_g1_i1.path2
	TRINITY_DN39029_c0_g1_i3.path1	TRINITY_DN1569_c2_g2_i1.path1	TRINITY_DN21572_c0_g1_i1.path2			TRINITY_DN76849_c0_g1_i1.path1	TRINITY_DN37154_c0_g1_i6.path1	TRINITY_DN42158_c0_g1_i1.path1
	TRINITY_DN39153_c0_g1_i1.path1	Pepsico2_Contig19245.path1	TRINITY_DN34932_c0_g1_i2.path1			Pepsico2_Contig9054.path1	TRINITY_DN2554_c0_g1_i11.path2	TRINITY_DN7656_c0_g1_i1.path1
	TRINITY_DN19732_c1_g1_i2.path2	TRINITY_DN33471_c0_g1_i1.path2	TRINITY_DN4150_c2_g1_i1.path1			TRINITY_DN102485_c0_g1_i1.path1	TRINITY_DN33471_c0_g1_i1.path1	TRINITY_DN5831_c0_g1_i3.path1
	TRINITY_DN59952_c0_g1_i1.path1	TRINITY_DN92652_c0_g1_i1.path2	novel.4196			TRINITY_DN26281_c0_g2_i1.path1	TRINITY_DN106711_c0_g1_i1.path1	TRINITY_DN27023_c0_g1_i1.path1
	novel.3230	novel.7680	TRINITY_DN19801_c0_g4_i1.path1			novel.2477	TRINITY_DN19578_c0_g2_i1.path1	TRINITY_DN36995_c0_g1_i1.path1
	novel.7680	TRINITY_DN35103_c2_g1_i1.path1	TRINITY_DN7795_c0_g1_i6.path3			TRINITY_DN13166_c1_g1_i1.path1	TRINITY_DN20545_c0_g2_i1.path1	novel.1820
	TRINITY_DN16826_c0_g1_i2.path1	TRINITY_DN28511_c1_g2_i1.path1	novel.9464			TRINITY_DN356_c0_g1_i3.path1	Pepsico2_Contig17640.path1	TRINITY_DN55418_c0_g1_i1.path1
	Pepsico2_Contig8201.path1	TRINITY_DN106898_c0_g1_i1.path1	TRINITY_DN19722_c0_g2_i1.path1			Pepsico2_Contig4734.path1	novel.8764	novel.1596
	TRINITY_DN97802_c0_g1_i1.path1	TRINITY_DN39059_c0_g1_i1.path1	TRINITY_DN8360_c1_g1_i1.path2			TRINITY_DN33442_c0_g2_i3.path1	novel.9330	TRINITY_DN45227_c2_g1_i1.path2
	novel.8478	TRINITY_DN40695_c0_g2_i2.path1	TRINITY_DN25061_c0_g2_i2.path1			novel.7058	TRINITY_DN18616_c0_g3_i1.path1	TRINITY_DN16038_c0_g1_i11.path1
	Pepsico2_Contig11818.path1	TRINITY_DN29405_c0_g1_i1.path1	TRINITY_DN96107_c0_g1_i1.path1			TRINITY_DN13166_c1_g2_i1.path1	TRINITY_DN36713_c0_g1_i3.path1	TRINITY_DN41786_c0_g1_i3.path1
	TRINITY_DN21752_c0_g1_i2.path2	novel.3230	novel.5600			TRINITY_DN36963_c0_g1_i1.path1	TRINITY_DN97339_c0_g1_i1.path1	TRINITY_DN34759_c0_g2_i1.path1
	TRINITY_DN12639_c0_g1_i6.path1	novel.290	TRINITY_DN34902_c0_g2_i2.path2			TRINITY_DN27379_c0_g1_i1.path1	TRINITY_DN33515_c0_g1_i2.path1	TRINITY_DN1917_c0_g1_i1.path1
	TRINITY_DN25061_c0_g2_i2.path1	TRINITY_DN19308_c0_g1_i4.path1	TRINITY_DN308_c0_g1_i1.path1			Pepsico1_Contig2378.path2	TRINITY_DN55872_c0_g1_i1.path1	TRINITY_DN17959_c0_g2_i1.path1
	TRINITY_DN32159_c0_g1_i1.path1	TRINITY_DN99177_c0_g1_i1.path1	TRINITY_DN71079_c0_g1_i1.path1			TRINITY_DN55845_c0_g1_i1.path1	TRINITY_DN70220_c0_g1_i1.path1	TRINITY_DN30521_c0_g1_i1.path1
	novel.1757	TRINITY_DN15878_c0_g2_i1.path1	TRINITY_DN7214_c0_g3_i2.path1			novel.1172	novel.8916	TRINITY_DN38220_c0_g1_i2.path1
	TRINITY_DN4515_c0_g1_i17.path3	novel.6325	TRINITY_DN30521_c0_g1_i1.path1			Pepsico2_Contig5998.path1	TRINITY_DN7472_c0_g3_i1.path1	TRINITY_DN12754_c0_g1_i1.path1
	TRINITY_DN21834_c0_g1_i1.path3	novel.9498	TRINITY_DN25777_c0_g1_i1.path1			Pepsico2_Contig6897.path1	TRINITY_DN37761_c0_g1_i1.path1	TRINITY_DN14623_c0_g1_i1.path1
	TRINITY_DN67392_c0_g1_i1.path1	Pepsico1_Contig26406.path1	Pepsico1_Contig11275.path1			TRINITY_DN25384_c0_g2_i1.path3	Pepsico2_Contig6074.path1	TRINITY_DN10332_c0_g2_i2.path1
	TRINITY_DN16151_c0_g5_i1.path1	TRINITY_DN8830_c0_g1_i19.path2	novel.9156			TRINITY_DN8085_c0_g1_i1.path1	TRINITY_DN16257_c1_g1_i5.path1	novel.826
	TRINITY_DN7072_c5_g1_i2.path1	Pepsico2_Contig16125.path1	TRINITY_DN10240_c0_g1_i12.path2			TRINITY_DN18481_c0_g1_i2.path1	TRINITY_DN2377_c0_g1_i1.path2	Pepsico2_Contig20002.path1
	TRINITY_DN15150_c0_g3_i4.path1	novel.7686	Pepsico2_Contig8026.path1			TRINITY_DN20489_c0_g1_i1.path1	novel.7823	TRINITY_DN41080_c0_g1_i1.path1
	Pepsico2_Contig11149.path1	TRINITY_DN8365_c1_g1_i7.path1	TRINITY_DN16858_c0_g1_i2.path1			novel.4694	Pepsico2_Contig7436.path1	TRINITY_DN9210_c0_g3_i1.path1
	novel.6729	TRINITY_DN92626_c0_g1_i1.path1	TRINITY_DN12758_c1_g1_i2.path1			TRINITY_DN41188_c0_g1_i1.path1	Pepsico1_Contig5817.path1	Pepsico2_Contig12882.path1
	TRINITY_DN25207_c0_g2_i3.path1	TRINITY_DN7172_c1_g1_i6.path1	Pepsico2_Contig20342.path1			TRINITY_DN11598_c0_g1_i1.path1	novel.1291	Pepsico2_Contig6340.path1
	TRINITY_DN82075_c0_g1_i1.path1	novel.3461	TRINITY_DN7470_c0_g1_i4.path2			TRINITY_DN106726_c0_g1_i1.path1	Pepsico2_Contig768.path1	TRINITY_DN8291_c1_g3_i8.path1
	TRINITY_DN7190_c0_g3_i1.path1	Pepsico2_Contig3315.path1	TRINITY_DN31190_c0_g1_i2.path1			novel.372	Pepsico2_Contig3832.path1	TRINITY_DN44228_c0_g1_i1.path1
	TRINITY_DN34621_c0_g1_i1.path2	TRINITY_DN23493_c0_g1_i1.path1	TRINITY_DN15949_c0_g1_i1.path1			novel.658	TRINITY_DN79353_c0_g1_i1.path1	TRINITY_DN11163_c1_g2_i1.path1
	TRINITY_DN25492_c0_g1_i1.path1	TRINITY_DN30131_c0_g1_i2.path1	novel.5310			novel.2086	TRINITY_DN16991_c0_g1_i1.path1	TRINITY_DN50138_c0_g1_i1.path1
	TRINITY_DN1619_c0_g1_i3.path1	TRINITY_DN24069_c0_g1_i1.path1	Pepsico2_Contig14825.path1			novel.3836	novel.2296	novel.5067
	TRINITY_DN7125_c0_g1_i8.path1	TRINITY_DN23817_c0_g1_i1.path2	TRINITY_DN18638_c0_g3_i1.path1			TRINITY_DN31382_c1_g1_i1.path1	TRINITY_DN42615_c0_g1_i3.path1	Pepsico2_Contig19795.path1
	Pepsico2_Contig9165.path2	TRINITY_DN1583_c0_g1_i1.path1	TRINITY_DN2377_c0_g1_i1.path1			Pepsico2_Contig13244.path2	Pepsico2_Contig8092.path1	Pepsico2_Contig2197.path1
	novel.877	TRINITY_DN78742_c0_g1_i1.path1	TRINITY_DN11376_c0_g1_i5.path1			novel.8998	novel.1977	TRINITY_DN69448_c0_g1_i1.path1
	TRINITY_DN15927_c0_g1_i3.path1	TRINITY_DN26560_c0_g3_i2.path1	TRINITY_DN58659_c0_g1_i1.path1			Pepsico1_Contig2151.path1	TRINITY_DN30268_c0_g5_i1.path1	TRINITY_DN15949_c0_g1_i1.path1
	TRINITY_DN7172_c1_g1_i6.path1	TRINITY_DN18437_c0_g1_i2.path1	TRINITY_DN15870_c0_g1_i3.path1			TRINITY_DN14497_c0_g1_i2.path1	TRINITY_DN4979_c0_g2_i5.path1	novel.9277
	novel.3680	TRINITY_DN13609_c0_g1_i3.path1	novel.5387			TRINITY_DN69321_c0_g1_i1.path1	TRINITY_DN102402_c0_g1_i1.path1	TRINITY_DN15952_c1_g1_i2.path2
	novel.7801	novel.2423	Pepsico2_Contig7122.path3			TRINITY_DN21247_c0_g1_i2.path2	novel.4325	TRINITY_DN12979_c0_g1_i5.path1
	Pepsico1_Contig26406.path1	novel.3694	TRINITY_DN8969_c0_g1_i5.path2			novel.9496	TRINITY_DN19031_c0_g2_i1.path1	TRINITY_DN98307_c0_g1_i1.path1
	novel.6293	novel.6171	TRINITY_DN17095_c0_g1_i2.path2			TRINITY_DN30113_c1_g1_i1.path1	TRINITY_DN79783_c0_g1_i1.path1	novel.2596
	novel.4326	TRINITY_DN37187_c1_g1_i1.path1	Pepsico1_Contig340.path2			TRINITY_DN34253_c0_g1_i1.path1	Pepsico2_Contig18089.path1	novel.7660
	Pepsico1_Contig22880.path1	Pepsico1_Contig23108.path1	TRINITY_DN21860_c0_g3_i2.path3			TRINITY_DN95361_c0_g1_i1.path1	novel.7680	Pepsico2_Contig8172.path2
	TRINITY_DN59441_c0_g1_i2.path2	novel.2763	TRINITY_DN54399_c0_g1_i1.path2			TRINITY_DN89248_c0_g1_i1.path1	TRINITY_DN13237_c0_g1_i10.path1	TRINITY_DN18468_c0_g1_i6.path1
	TRINITY_DN44649_c0_g1_i1.path1	Pepsico1_Contig880.path1	TRINITY_DN31212_c0_g1_i1.path1			TRINITY_DN5321_c0_g1_i10.path1	novel.6380	TRINITY_DN13715_c0_g1_i1.path1
	TRINITY_DN30521_c0_g1_i1.path1	TRINITY_DN30872_c0_g1_i1.path1	TRINITY_DN19159_c0_g3_i2.path1			TRINITY_DN32288_c0_g3_i1.path1	Pepsico2_Contig7863.path1	TRINITY_DN15272_c1_g1_i1.path1
	novel.6059	TRINITY_DN44353_c0_g1_i1.path1	TRINITY_DN40104_c0_g1_i1.path1			TRINITY_DN6633_c0_g1_i5.path2	TRINITY_DN19953_c0_g1_i3.path1	TRINITY_DN16702_c0_g1_i1.path1
	Pepsico2_Contig14974.path1	TRINITY_DN22934_c1_g3_i2.path1	novel.3921			TRINITY_DN26979_c0_g4_i2.path1	TRINITY_DN10806_c0_g1_i1.path2	TRINITY_DN23077_c0_g2_i1.path2
	TRINITY_DN19431_c0_g1_i4.path2	TRINITY_DN48354_c0_g2_i1.path1	TRINITY_DN18168_c0_g1_i2.path1			TRINITY_DN8322_c0_g1_i1.path2	Pepsico2_Contig14392.path1	TRINITY_DN44023_c0_g1_i4.path1
	TRINITY_DN11928_c2_g1_i1.path1	TRINITY_DN25922_c0_g1_i1.path1	Pepsico1_Contig3210.path1			TRINITY_DN45655_c0_g1_i1.path1	novel.6580	TRINITY_DN20412_c0_g3_i2.path3
	TRINITY_DN16433_c1_g1_i1.path1	TRINITY_DN75397_c0_g1_i1.path1	Pepsico1_Contig28425.path2			TRINITY_DN321_c2_g1_i4.path1	TRINITY_DN13964_c0_g2_i1.path1	TRINITY_DN5264_c0_g1_i8.path1
	TRINITY_DN88849_c0_g1_i1.path1	Pepsico2_Contig5893.path1	novel.8171			Pepsico2_Contig19052.path1	TRINITY_DN74489_c0_g1_i1.path1	TRINITY_DN90159_c0_g1_i1.path1
	Pepsico2_Contig15300.path1	TRINITY_DN31685_c0_g1_i1.path1	TRINITY_DN2500_c0_g1_i4.path2			Pepsico2_Contig6259.path1	TRINITY_DN36485_c0_g1_i2.path1	TRINITY_DN26162_c0_g1_i1.path1
	TRINITY_DN99626_c0_g1_i1.path1	Pepsico2_Contig17563.path1	novel.6691			TRINITY_DN29620_c0_g2_i1.path1	TRINITY_DN18437_c0_g1_i2.path1	novel.9427
	TRINITY_DN14827_c0_g1_i1.path1	TRINITY_DN23390_c0_g1_i1.path1	novel.3904			TRINITY_DN36978_c0_g1_i1.path1	Pepsico2_Contig17649.path1	TRINITY_DN30150_c0_g1_i1.path1
	novel.9437	novel.3639	Pepsico2_Contig20608.path1			TRINITY_DN17037_c0_g1_i2.path2	novel.9331	Pepsico1_Contig37083.path1
	Pepsico1_Contig7006.path1	TRINITY_DN70174_c0_g1_i1.path1	Pepsico2_Contig9973.path1			TRINITY_DN1619_c0_g1_i3.path1	Pepsico2_Contig20349.path1	TRINITY_DN111088_c0_g1_i1.path1
	TRINITY_DN90434_c0_g1_i1.path1	Pepsico2_Contig20227.path1	TRINITY_DN4027_c0_g5_i1.path3			TRINITY_DN13954_c0_g1_i1.path1	Pepsico2_Contig8879.path1	novel.1959
	TRINITY_DN99493_c0_g1_i1.path1	Pepsico2_Contig6124.path1	TRINITY_DN25186_c0_g1_i1.path2			TRINITY_DN85564_c0_g1_i1.path1	TRINITY_DN41188_c0_g1_i1.path1	TRINITY_DN28423_c0_g1_i1.path1
	novel.3360	Pepsico1_Contig15124.path2	TRINITY_DN976_c0_g1_i2.path2			TRINITY_DN11406_c0_g1_i1.path1	TRINITY_DN59954_c0_g1_i3.path1	novel.6343
	TRINITY_DN60733_c0_g1_i1.path2	TRINITY_DN15521_c0_g1_i2.path1	novel.5410			TRINITY_DN10632_c0_g1_i6.path1	TRINITY_DN20691_c0_g2_i1.path2	TRINITY_DN23908_c0_g1_i2.path1
	novel.6612	Pepsico2_Contig20128.path1	Pepsico2_Contig8034.path1			Pepsico2_Contig19412.path2	novel.6752	novel.3720
	TRINITY_DN22584_c0_g2_i1.path1	Pepsico2_Contig10389.path1	Pepsico2_Contig18269.path1			novel.9610	novel.5871	novel.5740
	novel.3581	TRINITY_DN21860_c0_g3_i2.path1	TRINITY_DN25161_c0_g1_i1.path1			TRINITY_DN23337_c0_g1_i1.path1	TRINITY_DN18524_c0_g1_i1.path1	TRINITY_DN5976_c0_g1_i12.path2
	TRINITY_DN17805_c1_g1_i1.path1	TRINITY_DN14427_c1_g1_i1.path1	Pepsico2_Contig16982.path1			TRINITY_DN19188_c0_g1_i2.path1	novel.4451	TRINITY_DN93432_c0_g1_i1.path1
	TRINITY_DN6235_c2_g2_i2.path1	TRINITY_DN15700_c1_g1_i1.path1	Pepsico1_Contig5476.path2			TRINITY_DN11478_c0_g2_i8.path1	TRINITY_DN24151_c0_g1_i3.path1	TRINITY_DN13120_c0_g3_i1.path1
	Pepsico2_Contig19877.path1	Pepsico2_Contig3659.path1	TRINITY_DN98822_c0_g1_i1.path1			TRINITY_DN2554_c0_g1_i11.path2	TRINITY_DN18348_c1_g1_i1.path1	novel.4663
	Pepsico2_Contig17522.path1	novel.5372	novel.5203			Pepsico2_Contig12692.path5	novel.3680	Pepsico2_Contig15361.path2
	Pepsico2_Contig17640.path1	TRINITY_DN106240_c0_g1_i1.path1	TRINITY_DN107387_c0_g1_i1.path1			Pepsico2_Contig8620.path1	TRINITY_DN51929_c0_g1_i1.path1	TRINITY_DN9896_c0_g1_i7.path1
	Pepsico2_Contig10630.path1	TRINITY_DN13050_c0_g1_i9.path1	novel.9142			TRINITY_DN59084_c0_g1_i1.path1	Pepsico2_Contig12787.path1	TRINITY_DN18616_c0_g3_i1.path1
	TRINITY_DN43919_c0_g1_i1.path1	TRINITY_DN4885_c0_g4_i1.path1	novel.9512			TRINITY_DN2683_c0_g1_i4.path1	TRINITY_DN2864_c0_g1_i5.path1	TRINITY_DN771_c0_g1_i2.path1
	TRINITY_DN475_c0_g1_i14.path1	Pepsico1_Contig5731.path1	novel.6546			TRINITY_DN41265_c0_g1_i1.path1	TRINITY_DN16063_c0_g1_i1.path1	TRINITY_DN3161_c0_g1_i1.path2
	Pepsico2_Contig12890.path4	novel.1758	Pepsico1_Contig26406.path2			novel.9063	TRINITY_DN31467_c0_g1_i1.path2	TRINITY_DN6010_c0_g1_i1.path1
	TRINITY_DN33761_c0_g1_i2.path1	TRINITY_DN27766_c1_g2_i1.path1	novel.1307			Pepsico1_Contig3149.path1	TRINITY_DN9169_c0_g1_i1.path2	TRINITY_DN94912_c0_g1_i1.path1
	novel.7203	novel.9053	TRINITY_DN38929_c0_g1_i2.path1			TRINITY_DN55690_c1_g1_i1.path1	TRINITY_DN15185_c0_g3_i5.path1	TRINITY_DN26976_c0_g1_i3.path1
	TRINITY_DN6439_c0_g1_i1.path2	novel.8823	Pepsico2_Contig19397.path1			TRINITY_DN43674_c0_g1_i1.path1	TRINITY_DN21572_c0_g1_i1.path1	novel.7403
	TRINITY_DN17072_c1_g2_i1.path1	TRINITY_DN241_c0_g2_i1.path1	TRINITY_DN38466_c0_g1_i1.path1			novel.5375	TRINITY_DN86212_c0_g1_i1.path1	TRINITY_DN11548_c0_g1_i5.path1
	TRINITY_DN4108_c0_g1_i5.path2	Pepsico2_Contig19467.path1	novel.4084			novel.4253	novel.6018	TRINITY_DN33515_c0_g1_i2.path1
	novel.3557	Pepsico1_Contig2800.path1	TRINITY_DN4852_c0_g2_i2.path1			TRINITY_DN60222_c0_g1_i2.path1	TRINITY_DN10123_c0_g5_i1.path1	TRINITY_DN35942_c0_g1_i1.path2
	novel.6695	TRINITY_DN41519_c0_g1_i1.path1	novel.7549			TRINITY_DN14002_c0_g1_i6.path1	Pepsico2_Contig10350.path1	Pepsico1_Contig71.path1
	Pepsico2_Contig15428.path1	Pepsico1_Contig1695.path1	TRINITY_DN16991_c0_g1_i1.path1			novel.3237	TRINITY_DN25492_c0_g1_i1.path1	novel.1956
	novel.6041	novel.7725	TRINITY_DN25579_c0_g1_i2.path1			TRINITY_DN19421_c0_g1_i1.path2	TRINITY_DN37868_c0_g1_i1.path1	TRINITY_DN47271_c0_g1_i1.path1
	novel.6515	TRINITY_DN6989_c0_g1_i1.path1	TRINITY_DN12758_c1_g2_i1.path3			TRINITY_DN10752_c0_g1_i1.path1	TRINITY_DN15158_c0_g2_i1.path1	TRINITY_DN32533_c0_g1_i1.path2
	Pepsico2_Contig18502.path1	novel.10561	TRINITY_DN1662_c0_g1_i1.path1			TRINITY_DN6098_c0_g1_i2.path1	novel.2760	TRINITY_DN20518_c0_g1_i1.path1
	Pepsico2_Contig15269.path1	TRINITY_DN20889_c1_g1_i1.path1	TRINITY_DN5109_c0_g1_i2.path1			Pepsico2_Contig9084.path1	Pepsico2_Contig12703.path1	TRINITY_DN65056_c0_g1_i1.path2
	TRINITY_DN13925_c0_g1_i6.path1	TRINITY_DN22803_c0_g1_i5.path2	novel.9302			TRINITY_DN41418_c0_g2_i1.path1	TRINITY_DN69362_c0_g1_i1.path1	novel.7396
	novel.1010	Pepsico1_Contig27244.path1	Pepsico1_Contig4326.path1			TRINITY_DN28094_c0_g1_i2.path1	TRINITY_DN10927_c0_g1_i1.path1	TRINITY_DN11717_c0_g1_i1.path2
	Pepsico2_Contig12177.path2	TRINITY_DN26636_c0_g2_i3.path1	TRINITY_DN93154_c0_g1_i1.path1			TRINITY_DN22934_c1_g3_i2.path1	Pepsico2_Contig4402.path1	TRINITY_DN18829_c1_g1_i1.path3
	TRINITY_DN32918_c0_g3_i1.path1	TRINITY_DN76151_c0_g1_i1.path1	TRINITY_DN30818_c0_g1_i1.path2			TRINITY_DN103644_c0_g1_i1.path1	TRINITY_DN93760_c0_g1_i1.path1	novel.4941
	TRINITY_DN19157_c0_g1_i5.path1	Pepsico2_Contig638.path1	TRINITY_DN37282_c0_g1_i1.path2			Pepsico1_Contig31958.path1	TRINITY_DN21686_c1_g1_i1.path1	TRINITY_DN3163_c0_g1_i6.path1
	novel.3076	TRINITY_DN9252_c1_g1_i1.path2	TRINITY_DN39059_c0_g1_i1.path1			TRINITY_DN82984_c0_g1_i1.path1	TRINITY_DN19447_c0_g1_i1.path2	novel.9497
	TRINITY_DN43670_c2_g1_i1.path2	TRINITY_DN11303_c1_g1_i4.path2	TRINITY_DN33165_c0_g3_i2.path1			TRINITY_DN32286_c0_g2_i1.path1	TRINITY_DN15169_c0_g1_i3.path1	TRINITY_DN12254_c0_g1_i1.path1
	TRINITY_DN30150_c0_g1_i1.path1	TRINITY_DN106726_c0_g1_i1.path1	TRINITY_DN11150_c1_g2_i1.path1			TRINITY_DN582_c2_g1_i6.path3	Pepsico1_Contig4345.path1	TRINITY_DN10530_c0_g1_i3.path1
	Pepsico2_Contig13244.path1	TRINITY_DN24943_c0_g1_i1.path1	TRINITY_DN15198_c0_g2_i2.path1			TRINITY_DN11167_c2_g1_i1.path1	Pepsico1_Contig8149.path1	TRINITY_DN106898_c0_g1_i1.path1
	Pepsico1_Contig38485.path1	TRINITY_DN6454_c0_g2_i1.path2	TRINITY_DN92623_c0_g1_i1.path1			TRINITY_DN9291_c0_g1_i1.path1	TRINITY_DN17530_c0_g1_i1.path2	TRINITY_DN11015_c0_g2_i1.path2
	Pepsico2_Contig14392.path2	TRINITY_DN26976_c0_g1_i3.path1	TRINITY_DN99363_c0_g1_i1.path1			Pepsico2_Contig17023.path1	TRINITY_DN65824_c0_g1_i1.path1	TRINITY_DN29949_c4_g1_i1.path1
	novel.672	TRINITY_DN20691_c0_g2_i1.path1	Pepsico2_Contig4608.path3			novel.3674	TRINITY_DN14677_c0_g1_i3.path1	TRINITY_DN10123_c0_g5_i1.path1
	novel.3005	Pepsico2_Contig1916.path2	TRINITY_DN934_c0_g1_i1.path1			TRINITY_DN4879_c0_g2_i1.path1	TRINITY_DN16283_c0_g2_i1.path1	TRINITY_DN5174_c1_g1_i2.path1
	TRINITY_DN25758_c0_g1_i2.path1	TRINITY_DN20865_c0_g1_i2.path1	TRINITY_DN45793_c0_g1_i1.path1			TRINITY_DN19419_c0_g2_i1.path1	TRINITY_DN8181_c0_g2_i1.path1	Pepsico2_Contig3801.path1
	TRINITY_DN14321_c0_g1_i1.path2	TRINITY_DN21236_c1_g1_i1.path1	Pepsico2_Contig13090.path1			Pepsico2_Contig15038.path1	TRINITY_DN79513_c0_g1_i1.path1	TRINITY_DN20062_c0_g1_i1.path1
	TRINITY_DN98307_c0_g1_i1.path1	TRINITY_DN27456_c0_g1_i1.path1	novel.10039			TRINITY_DN22803_c0_g1_i5.path2	TRINITY_DN24943_c0_g1_i1.path1	TRINITY_DN4491_c1_g1_i6.path1
	novel.7660	Pepsico1_Contig1632.path1	TRINITY_DN69448_c0_g1_i1.path1			novel.7738	TRINITY_DN106726_c0_g1_i1.path1	TRINITY_DN25572_c0_g1_i1.path2
	Pepsico1_Contig1511.path1	TRINITY_DN49473_c0_g1_i1.path1	TRINITY_DN40719_c2_g1_i1.path1			TRINITY_DN4139_c0_g2_i1.path1	TRINITY_DN55130_c0_g1_i1.path1	TRINITY_DN45040_c0_g2_i1.path2
	TRINITY_DN14427_c1_g1_i1.path1	TRINITY_DN19177_c0_g1_i1.path2	TRINITY_DN70268_c0_g1_i1.path1			TRINITY_DN11920_c1_g2_i1.path1	TRINITY_DN11373_c1_g1_i12.path2	TRINITY_DN36993_c0_g1_i1.path1
	TRINITY_DN14212_c0_g1_i1.path1	TRINITY_DN67840_c0_g1_i1.path1	TRINITY_DN30537_c0_g1_i1.path1			TRINITY_DN12683_c0_g2_i2.path1	TRINITY_DN4812_c0_g1_i1.path1	novel.2696
	TRINITY_DN11402_c0_g1_i6.path1	TRINITY_DN79795_c0_g1_i1.path1	novel.4998			Pepsico2_Contig17478.path1	novel.4320	TRINITY_DN19967_c0_g1_i9.path1
	novel.5006	novel.1993	TRINITY_DN14625_c0_g4_i1.path1			novel.8944	TRINITY_DN43074_c0_g2_i1.path1	novel.7498
	TRINITY_DN28465_c0_g1_i1.path1	Pepsico2_Contig4927.path2	TRINITY_DN10443_c0_g1_i1.path2			TRINITY_DN6230_c1_g1_i1.path1	TRINITY_DN49172_c0_g1_i1.path1	TRINITY_DN34655_c0_g1_i1.path1
	TRINITY_DN58833_c0_g1_i1.path1	TRINITY_DN10595_c0_g2_i2.path2	TRINITY_DN1922_c0_g1_i4.path1			TRINITY_DN102479_c0_g1_i1.path1	TRINITY_DN29781_c0_g1_i2.path1	TRINITY_DN15169_c0_g1_i3.path1
	TRINITY_DN108193_c0_g1_i1.path1	TRINITY_DN97555_c0_g1_i1.path1	TRINITY_DN50089_c0_g1_i4.path1			Pepsico2_Contig6463.path1	novel.380	TRINITY_DN22453_c1_g1_i4.path1
	TRINITY_DN43953_c0_g2_i1.path1	TRINITY_DN9674_c0_g3_i1.path1	TRINITY_DN15126_c0_g1_i1.path1			Pepsico2_Contig4751.path1	TRINITY_DN22925_c0_g1_i4.path1	TRINITY_DN11402_c0_g1_i6.path1
	TRINITY_DN13542_c0_g1_i1.path1	TRINITY_DN29549_c0_g1_i2.path1	TRINITY_DN18061_c0_g1_i1.path1			TRINITY_DN19166_c0_g1_i6.path1	novel.2367	TRINITY_DN52160_c0_g1_i1.path1
	TRINITY_DN16238_c0_g1_i5.path1	TRINITY_DN7469_c0_g1_i1.path1	TRINITY_DN15455_c0_g1_i7.path2			TRINITY_DN102774_c0_g1_i1.path1	novel.7150	Pepsico1_Contig22394.path1
	TRINITY_DN9773_c0_g2_i1.path1	Pepsico1_Contig6029.path1	novel.8920			Pepsico2_Contig7659.path1	TRINITY_DN21095_c0_g1_i1.path1	TRINITY_DN32004_c0_g1_i1.path1
	novel.5350	novel.3151	TRINITY_DN28700_c0_g4_i1.path1			TRINITY_DN90723_c0_g1_i1.path1	novel.9338	TRINITY_DN26292_c0_g1_i1.path2
	TRINITY_DN4041_c0_g1_i6.path1	Pepsico2_Contig998.path1	novel.4160			TRINITY_DN58174_c1_g1_i1.path1	TRINITY_DN8648_c0_g1_i4.path2	TRINITY_DN12300_c0_g2_i1.path1
	TRINITY_DN96972_c0_g1_i1.path1	TRINITY_DN47679_c0_g1_i1.path1	Pepsico2_Contig17730.path1			novel.661	TRINITY_DN22934_c1_g3_i2.path1	TRINITY_DN16421_c0_g1_i9.path1
	Pepsico2_Contig19554.path1	TRINITY_DN20616_c0_g1_i1.path1	TRINITY_DN43861_c0_g1_i2.path1			TRINITY_DN31204_c0_g2_i1.path2	TRINITY_DN13777_c0_g1_i4.path1	TRINITY_DN12498_c0_g1_i2.path1
	TRINITY_DN4651_c0_g1_i6.path1	novel.8920	TRINITY_DN27766_c1_g2_i1.path1			Pepsico2_Contig12716.path1	novel.1187	Pepsico2_Contig6611.path2
	Pepsico2_Contig13147.path1	TRINITY_DN11167_c2_g1_i1.path1	TRINITY_DN81712_c0_g1_i1.path1			Pepsico2_Contig6438.path1	TRINITY_DN24409_c0_g1_i2.path1	Pepsico2_Contig3317.path1
	TRINITY_DN555_c0_g1_i2.path1	Pepsico2_Contig16821.path1	TRINITY_DN79795_c0_g1_i1.path1			Pepsico2_Contig6611.path4	TRINITY_DN7964_c0_g1_i2.path2	TRINITY_DN15667_c0_g1_i1.path1
	novel.8279	TRINITY_DN6573_c0_g1_i4.path1	TRINITY_DN11509_c0_g1_i7.path1			TRINITY_DN21095_c0_g1_i1.path1	Pepsico2_Contig6340.path1	TRINITY_DN106511_c0_g1_i1.path1
	Pepsico2_Contig15498.path1	TRINITY_DN7884_c0_g1_i4.path1	TRINITY_DN13663_c0_g1_i6.path1			TRINITY_DN24943_c0_g1_i1.path1	novel.10304	TRINITY_DN54354_c0_g1_i1.path1
	TRINITY_DN89248_c0_g1_i1.path1	novel.9339	TRINITY_DN31212_c0_g2_i1.path1			TRINITY_DN107606_c0_g1_i1.path1	novel.4349	TRINITY_DN29734_c0_g1_i9.path1
	TRINITY_DN4074_c1_g2_i2.path2	TRINITY_DN21860_c0_g3_i2.path3	Pepsico2_Contig5226.path1			TRINITY_DN112669_c0_g1_i1.path1	novel.9893	Pepsico1_Contig3446.path1
	novel.5395	novel.2342	Pepsico1_Contig2398.path1			TRINITY_DN10053_c2_g1_i1.path1	TRINITY_DN3251_c0_g1_i1.path1	TRINITY_DN24065_c0_g1_i1.path1
	Pepsico2_Contig6846.path2	TRINITY_DN10782_c0_g1_i1.path1	TRINITY_DN3664_c0_g3_i1.path1			TRINITY_DN8456_c1_g1_i1.path1	Pepsico2_Contig17145.path1	TRINITY_DN27890_c0_g1_i1.path1
	TRINITY_DN2993_c1_g1_i1.path1	TRINITY_DN86219_c0_g1_i1.path1	Pepsico2_Contig7831.path2			novel.9307	Pepsico2_Contig20722.path1	Pepsico2_Contig8062.path1
	novel.2374	TRINITY_DN29334_c0_g1_i1.path1	TRINITY_DN32743_c0_g1_i1.path2			novel.5871	novel.6507	Pepsico1_Contig5077.path1
	Pepsico2_Contig6752.path1	TRINITY_DN19801_c0_g4_i1.path1	TRINITY_DN5877_c0_g1_i5.path1			TRINITY_DN39219_c0_g1_i1.path2	TRINITY_DN15372_c0_g1_i1.path1	TRINITY_DN19801_c0_g4_i1.path1
	TRINITY_DN12176_c0_g1_i8.path1	TRINITY_DN74907_c0_g1_i1.path1	TRINITY_DN112540_c0_g1_i1.path1			novel.3853	TRINITY_DN9210_c0_g3_i1.path1	TRINITY_DN92626_c0_g1_i1.path1
	TRINITY_DN8252_c0_g3_i1.path1	TRINITY_DN39061_c0_g1_i1.path3	Pepsico2_Contig8115.path1			novel.7470	Pepsico2_Contig16783.path1	TRINITY_DN10806_c0_g1_i1.path2
	TRINITY_DN109604_c0_g1_i1.path1	Pepsico1_Contig33695.path1	Pepsico1_Contig3710.path1			novel.2827	TRINITY_DN17805_c1_g1_i1.path1	TRINITY_DN25492_c0_g1_i1.path1
	TRINITY_DN7698_c0_g1_i1.path1	TRINITY_DN7268_c0_g1_i3.path2	novel.4048			TRINITY_DN16403_c0_g1_i3.path1	TRINITY_DN8365_c1_g1_i7.path1	TRINITY_DN91938_c0_g1_i1.path1
	novel.1785	TRINITY_DN6189_c0_g2_i2.path1	Pepsico2_Contig6523.path1			TRINITY_DN53290_c0_g1_i1.path1	TRINITY_DN33471_c0_g1_i1.path2	TRINITY_DN36003_c0_g1_i1.path1
	TRINITY_DN106240_c0_g1_i1.path1	novel.178	TRINITY_DN22549_c0_g2_i1.path1			TRINITY_DN78797_c0_g1_i1.path1	Pepsico2_Contig19779.path1	TRINITY_DN16286_c0_g1_i4.path1
	TRINITY_DN54354_c0_g2_i1.path1	novel.4122	novel.6885			TRINITY_DN22412_c0_g1_i1.path1	TRINITY_DN57099_c0_g1_i2.path1	TRINITY_DN21405_c1_g2_i1.path1
	TRINITY_DN97555_c0_g1_i1.path1	TRINITY_DN9210_c0_g1_i2.path1	Pepsico2_Contig3180.path1			TRINITY_DN22741_c0_g2_i2.path1	novel.5334	TRINITY_DN37187_c1_g1_i1.path1
	Pepsico2_Contig11265.path1	Pepsico2_Contig7741.path2	Pepsico2_Contig3505.path1			TRINITY_DN4606_c0_g2_i1.path1	TRINITY_DN88734_c0_g1_i1.path1	novel.4339
	TRINITY_DN20585_c0_g1_i1.path1	TRINITY_DN9597_c0_g1_i4.path1	Pepsico1_Contig2677.path1			TRINITY_DN16228_c0_g1_i5.path1	TRINITY_DN20966_c0_g5_i1.path1	TRINITY_DN21421_c0_g1_i1.path2
	TRINITY_DN40004_c0_g1_i2.path1	TRINITY_DN36881_c0_g3_i1.path1	Pepsico1_Contig23108.path1			TRINITY_DN55600_c0_g1_i1.path1	Pepsico1_Contig6523.path1	Pepsico2_Contig11410.path1
	novel.1390	novel.10001	TRINITY_DN109683_c0_g1_i1.path1			TRINITY_DN6025_c0_g1_i12.path1	TRINITY_DN59952_c0_g1_i1.path1	TRINITY_DN1623_c1_g1_i8.path2
	TRINITY_DN32638_c0_g1_i1.path1	TRINITY_DN61247_c0_g1_i1.path1	TRINITY_DN33442_c0_g2_i3.path1			TRINITY_DN50291_c0_g1_i2.path1	TRINITY_DN17829_c0_g1_i1.path1	TRINITY_DN91373_c0_g1_i1.path1
	Pepsico1_Contig8171.path1	novel.399	novel.8181			TRINITY_DN107882_c0_g1_i1.path1	Pepsico2_Contig6242.path1	Pepsico2_Contig13209.path1
	novel.6885	TRINITY_DN52947_c0_g1_i1.path1	Pepsico2_Contig4421.path1			TRINITY_DN91242_c0_g1_i1.path1	Pepsico2_Contig3536.path1	novel.10573
	novel.4274	TRINITY_DN283_c1_g1_i5.path3	TRINITY_DN11470_c0_g1_i1.path1			TRINITY_DN20815_c0_g2_i1.path2	TRINITY_DN34221_c0_g1_i1.path1	novel.7823
	TRINITY_DN69326_c0_g1_i1.path1	TRINITY_DN10932_c1_g1_i1.path2	Pepsico1_Contig26406.path1			TRINITY_DN10620_c0_g3_i1.path1	TRINITY_DN3623_c1_g1_i3.path1	Pepsico2_Contig14315.path1
	TRINITY_DN51163_c0_g1_i1.path1	Pepsico1_Contig826.path1	Pepsico2_Contig7160.path2			TRINITY_DN28026_c0_g1_i1.path1	TRINITY_DN47947_c0_g1_i1.path1	Pepsico2_Contig3845.path1
	TRINITY_DN9196_c0_g1_i2.path1	TRINITY_DN19695_c0_g1_i1.path1	TRINITY_DN36898_c0_g1_i7.path2			Pepsico2_Contig15519.path2	TRINITY_DN16257_c1_g1_i5.path2	TRINITY_DN556_c0_g1_i1.path3
	TRINITY_DN26778_c0_g1_i1.path1	TRINITY_DN94722_c0_g1_i1.path1	TRINITY_DN28658_c0_g1_i1.path1			TRINITY_DN24825_c0_g4_i2.path1	novel.335	TRINITY_DN72136_c0_g1_i1.path1
	TRINITY_DN35314_c0_g1_i3.path1	TRINITY_DN20381_c0_g1_i4.path1	Pepsico2_Contig19415.path1			Pepsico2_Contig660.path1	TRINITY_DN19173_c0_g1_i3.path2	Pepsico1_Contig603.path2
	TRINITY_DN20707_c1_g2_i1.path1	TRINITY_DN44492_c0_g1_i1.path1	Pepsico2_Contig4693.path1			Pepsico2_Contig10073.path2	TRINITY_DN76361_c0_g1_i1.path1	Pepsico2_Contig9477.path1
	novel.9321	TRINITY_DN37339_c0_g1_i2.path1	TRINITY_DN36119_c0_g1_i1.path1			TRINITY_DN24494_c0_g1_i1.path1	TRINITY_DN14129_c0_g1_i5.path2	TRINITY_DN19722_c0_g2_i1.path1
	TRINITY_DN4830_c0_g3_i1.path1	TRINITY_DN25055_c0_g1_i1.path1	TRINITY_DN32533_c0_g1_i1.path2			novel.10231	TRINITY_DN8929_c0_g1_i2.path1	TRINITY_DN17492_c0_g1_i1.path1
	TRINITY_DN32250_c0_g1_i1.path1	novel.9690	TRINITY_DN17413_c0_g2_i1.path1			novel.2117	TRINITY_DN55546_c0_g1_i1.path1	Pepsico2_Contig15659.path1
	TRINITY_DN24065_c0_g1_i1.path1	TRINITY_DN44227_c0_g1_i1.path1	TRINITY_DN52099_c0_g1_i1.path2			novel.7730	TRINITY_DN17358_c1_g3_i2.path1	TRINITY_DN24179_c1_g1_i1.path1
	Pepsico2_Contig12890.path1	TRINITY_DN20062_c0_g1_i1.path1	TRINITY_DN74662_c0_g1_i1.path1			novel.9193	novel.7716	TRINITY_DN27316_c0_g1_i2.path1
	TRINITY_DN5931_c0_g1_i7.path1	TRINITY_DN26343_c0_g2_i1.path2	TRINITY_DN3768_c0_g1_i9.path1			TRINITY_DN107396_c0_g1_i1.path1	TRINITY_DN75666_c0_g1_i1.path1	TRINITY_DN12648_c0_g1_i8.path1
	Pepsico2_Contig3517.path1	Pepsico1_Contig1106.path1	TRINITY_DN10843_c1_g1_i1.path2			novel.9987	TRINITY_DN33835_c0_g1_i1.path1	TRINITY_DN17413_c0_g2_i1.path1
	TRINITY_DN18893_c0_g1_i1.path1	Pepsico2_Contig7277.path1	TRINITY_DN29788_c0_g2_i1.path1			novel.9437	TRINITY_DN4613_c0_g1_i2.path1	TRINITY_DN53615_c0_g1_i2.path1
	novel.6673	TRINITY_DN3664_c0_g2_i1.path1	novel.3835			TRINITY_DN20875_c0_g1_i1.path2	Pepsico2_Contig7603.path1	novel.1447
	novel.5461	TRINITY_DN40378_c0_g2_i2.path2	novel.1318			Pepsico2_Contig10893.path2	Pepsico1_Contig3801.path1	TRINITY_DN26074_c0_g1_i1.path1
	TRINITY_DN45592_c0_g1_i2.path1	TRINITY_DN32159_c0_g1_i1.path3	TRINITY_DN10826_c0_g1_i2.path1			Pepsico2_Contig17412.path1	Pepsico2_Contig19238.path1	TRINITY_DN5870_c0_g2_i1.path1
	TRINITY_DN582_c2_g1_i6.path3	TRINITY_DN16368_c0_g1_i4.path1	TRINITY_DN16368_c0_g1_i4.path1			Pepsico1_Contig38218.path1	TRINITY_DN22732_c0_g2_i3.path1	TRINITY_DN2365_c0_g1_i15.path1
	TRINITY_DN55546_c0_g1_i1.path1	TRINITY_DN28423_c0_g1_i1.path1	TRINITY_DN29790_c0_g1_i1.path1			TRINITY_DN19368_c0_g1_i7.path1	TRINITY_DN87482_c0_g1_i1.path1	TRINITY_DN7636_c1_g1_i1.path1
	TRINITY_DN9201_c0_g1_i1.path1	Pepsico2_Contig5996.path1	TRINITY_DN42283_c0_g1_i1.path1			TRINITY_DN28580_c0_g1_i1.path1	TRINITY_DN48186_c0_g1_i1.path1	Pepsico1_Contig6507.path1
	Pepsico2_Contig8080.path1	Pepsico2_Contig6015.path1	novel.4772			TRINITY_DN17610_c0_g2_i1.path1	TRINITY_DN24420_c0_g1_i1.path1	novel.7223
	TRINITY_DN10865_c0_g1_i1.path1	novel.2407	novel.9339			Pepsico2_Contig4262.path1	novel.9937	novel.9749
	TRINITY_DN48737_c0_g1_i1.path1	TRINITY_DN28284_c0_g1_i3.path1	novel.2092			novel.4449	novel.4671	TRINITY_DN5389_c1_g1_i1.path1
	TRINITY_DN29865_c0_g1_i1.path1	Pepsico1_Contig37595.path1	TRINITY_DN32075_c0_g5_i3.path1			TRINITY_DN1543_c0_g1_i1.path1	TRINITY_DN876_c1_g2_i3.path1	TRINITY_DN16063_c0_g1_i1.path1
	TRINITY_DN11076_c0_g1_i1.path2	novel.5070	novel.2652			Pepsico2_Contig2989.path1	TRINITY_DN6235_c2_g2_i2.path1	TRINITY_DN27580_c0_g1_i1.path2
	TRINITY_DN35580_c0_g1_i6.path1	Pepsico1_Contig4382.path1	TRINITY_DN8001_c0_g1_i3.path1			Pepsico2_Contig15950.path2	TRINITY_DN17904_c0_g1_i4.path1	novel.7642
	Pepsico2_Contig19940.path1	TRINITY_DN3419_c0_g1_i1.path2	TRINITY_DN32751_c0_g2_i7.path1			TRINITY_DN19760_c0_g1_i2.path1	TRINITY_DN82075_c0_g1_i1.path1	Pepsico2_Contig20286.path1
	novel.5303	TRINITY_DN7061_c0_g1_i3.path1	novel.8478			TRINITY_DN536_c0_g1_i1.path1	novel.7506	novel.7021
	TRINITY_DN1928_c0_g1_i7.path2	TRINITY_DN72337_c0_g1_i1.path1	TRINITY_DN618_c0_g1_i2.path1			Pepsico2_Contig8026.path1	TRINITY_DN10240_c0_g1_i12.path2	Pepsico2_Contig4717.path1
	Pepsico1_Contig36310.path1	TRINITY_DN42793_c0_g1_i1.path1	TRINITY_DN10168_c0_g1_i3.path3			novel.5438	novel.7249	TRINITY_DN15500_c0_g1_i3.path1
	Pepsico2_Contig7893.path1	novel.4027	TRINITY_DN39061_c0_g1_i1.path3			novel.639	TRINITY_DN106452_c0_g1_i1.path1	TRINITY_DN18489_c1_g1_i1.path1
	Pepsico2_Contig4084.path1	TRINITY_DN103356_c0_g1_i1.path1	novel.7857			Pepsico2_Contig14783.path1	Pepsico2_Contig7520.path1	novel.1071
	TRINITY_DN21351_c1_g2_i1.path1	TRINITY_DN14_c0_g1_i1.path1	TRINITY_DN14427_c1_g1_i1.path1			TRINITY_DN3623_c1_g2_i3.path1	TRINITY_DN28511_c0_g1_i5.path1	TRINITY_DN34253_c0_g1_i1.path1
	Pepsico2_Contig20185.path1	TRINITY_DN17858_c0_g1_i4.path1	novel.1483			novel.1049	novel.1308	novel.4121
	novel.4541	Pepsico1_Contig2378.path1	TRINITY_DN21282_c0_g1_i1.path1			TRINITY_DN8969_c0_g1_i5.path1	TRINITY_DN84840_c0_g1_i1.path1	TRINITY_DN29886_c0_g2_i1.path1
	TRINITY_DN35511_c0_g2_i1.path1	Pepsico2_Contig20002.path1	TRINITY_DN24045_c0_g1_i1.path1			TRINITY_DN10115_c0_g1_i2.path1	TRINITY_DN17122_c0_g1_i2.path1	Pepsico2_Contig19828.path1
	TRINITY_DN14410_c0_g2_i1.path1	TRINITY_DN36862_c0_g1_i1.path3	TRINITY_DN27793_c1_g1_i1.path1			TRINITY_DN97498_c0_g1_i1.path1	Pepsico2_Contig8062.path1	TRINITY_DN15065_c0_g3_i1.path1
	novel.5555	TRINITY_DN10240_c0_g1_i12.path2	TRINITY_DN21009_c0_g1_i1.path1			TRINITY_DN16572_c0_g2_i2.path1	TRINITY_DN19457_c1_g1_i1.path1	TRINITY_DN95404_c0_g1_i1.path1
	Pepsico1_Contig854.path1	novel.2023	TRINITY_DN63224_c0_g1_i1.path1			Pepsico2_Contig17682.path1	TRINITY_DN879_c0_g2_i1.path1	novel.6675
	TRINITY_DN11593_c3_g1_i1.path1	Pepsico2_Contig19863.path1	Pepsico1_Contig3724.path2			TRINITY_DN53881_c0_g1_i1.path1	TRINITY_DN31463_c0_g1_i1.path1	TRINITY_DN106725_c0_g1_i1.path1
	novel.1353	TRINITY_DN13120_c0_g3_i1.path1	TRINITY_DN7477_c0_g2_i1.path1			TRINITY_DN94642_c0_g1_i1.path1	TRINITY_DN17037_c0_g1_i2.path2	TRINITY_DN71598_c0_g1_i1.path1
	TRINITY_DN15198_c0_g2_i2.path1	novel.2358	TRINITY_DN52947_c0_g1_i1.path1			novel.5200	TRINITY_DN15239_c0_g1_i10.path1	TRINITY_DN36485_c0_g1_i2.path1
	TRINITY_DN96412_c0_g1_i1.path1	Pepsico1_Contig71.path1	TRINITY_DN19695_c0_g1_i1.path1			TRINITY_DN21918_c0_g1_i3.path1	Pepsico2_Contig7277.path2	Pepsico2_Contig20029.path1
	TRINITY_DN5056_c0_g1_i2.path1	TRINITY_DN11473_c0_g1_i3.path1	TRINITY_DN20480_c0_g1_i1.path2			TRINITY_DN29565_c0_g2_i1.path1	novel.585	novel.5929
	TRINITY_DN1917_c0_g1_i1.path1	novel.5815	novel.5752			TRINITY_DN12167_c0_g1_i2.path1	TRINITY_DN81476_c0_g1_i1.path1	novel.9814
	TRINITY_DN23713_c0_g1_i1.path1	TRINITY_DN44409_c0_g1_i3.path1	Pepsico1_Contig71.path1			TRINITY_DN40963_c0_g1_i1.path2	TRINITY_DN45335_c0_g1_i1.path1	TRINITY_DN24042_c0_g1_i2.path2
	novel.4935	TRINITY_DN40719_c1_g1_i1.path1	TRINITY_DN15594_c0_g1_i4.path1			novel.7402	TRINITY_DN10826_c0_g1_i2.path1	TRINITY_DN17095_c0_g1_i2.path2
	TRINITY_DN20945_c0_g1_i4.path1	TRINITY_DN22203_c1_g1_i2.path2	TRINITY_DN72210_c0_g1_i1.path1			novel.5156	TRINITY_DN101432_c0_g1_i1.path1	TRINITY_DN11373_c1_g1_i12.path2
	TRINITY_DN75397_c0_g1_i1.path1	TRINITY_DN26760_c0_g1_i1.path1	TRINITY_DN35887_c1_g1_i1.path3			TRINITY_DN24934_c0_g1_i1.path1	TRINITY_DN13219_c0_g1_i1.path1	TRINITY_DN4325_c0_g1_i5.path2
	TRINITY_DN57946_c0_g2_i1.path1	TRINITY_DN5870_c0_g2_i1.path1	Pepsico2_Contig15659.path2			Pepsico1_Contig24063.path2	novel.9785	TRINITY_DN115346_c0_g1_i1.path1
	TRINITY_DN32743_c0_g1_i1.path2	TRINITY_DN18480_c0_g1_i4.path1	TRINITY_DN18179_c0_g2_i1.path2			TRINITY_DN19900_c0_g1_i1.path1	Pepsico2_Contig6417.path1	Pepsico2_Contig11242.path1
	Pepsico2_Contig15678.path1	TRINITY_DN7477_c0_g2_i1.path1	novel.3776			Pepsico2_Contig11122.path1	novel.954	TRINITY_DN606_c0_g1_i1.path1
	TRINITY_DN5707_c0_g1_i2.path3	TRINITY_DN20412_c0_g3_i2.path3	TRINITY_DN8830_c0_g1_i19.path2			TRINITY_DN9712_c0_g2_i1.path1	Pepsico2_Contig20003.path1	novel.8528
	Pepsico1_Contig1029.path2	TRINITY_DN2389_c0_g2_i2.path1	TRINITY_DN28284_c0_g1_i3.path1			novel.5067	TRINITY_DN5293_c0_g1_i2.path2	TRINITY_DN22984_c1_g1_i1.path1
	TRINITY_DN79972_c0_g1_i1.path1	novel.6358	TRINITY_DN4542_c0_g1_i3.path1			TRINITY_DN39197_c0_g1_i5.path1	TRINITY_DN38268_c0_g1_i1.path1	novel.3983
	TRINITY_DN64678_c0_g1_i1.path1	TRINITY_DN29886_c0_g2_i1.path1	TRINITY_DN11017_c0_g1_i2.path2			TRINITY_DN13963_c0_g1_i1.path1	TRINITY_DN99713_c0_g1_i1.path1	TRINITY_DN33540_c0_g1_i2.path1
	TRINITY_DN27890_c0_g1_i1.path1	Pepsico2_Contig18269.path1	Pepsico2_Contig7109.path1			TRINITY_DN107087_c0_g1_i1.path1	TRINITY_DN5990_c2_g1_i2.path1	Pepsico1_Contig928.path1
	novel.9498	TRINITY_DN13584_c0_g2_i1.path1	novel.1619			TRINITY_DN8360_c1_g1_i1.path2	TRINITY_DN8211_c0_g1_i1.path1	novel.5544
	TRINITY_DN84084_c0_g1_i1.path1	TRINITY_DN36478_c0_g2_i1.path1	Pepsico2_Contig20029.path3			novel.6897	TRINITY_DN24825_c0_g3_i1.path1	Pepsico2_Contig11254.path1
	TRINITY_DN2053_c0_g1_i15.path2	novel.3046	TRINITY_DN59339_c0_g1_i2.path1			novel.2791	TRINITY_DN30748_c0_g1_i3.path1	novel.5555
	TRINITY_DN33471_c0_g1_i1.path2	novel.3551	TRINITY_DN20815_c0_g2_i1.path2			Pepsico1_Contig6031.path1	TRINITY_DN25100_c0_g2_i2.path1	TRINITY_DN33625_c0_g1_i1.path2
	TRINITY_DN20543_c0_g1_i1.path1	TRINITY_DN3065_c0_g1_i2.path1	novel.6535			TRINITY_DN38353_c1_g1_i3.path1	TRINITY_DN2053_c0_g1_i15.path1	TRINITY_DN6065_c0_g1_i2.path1
	Pepsico2_Contig21203.path1	TRINITY_DN60499_c0_g1_i1.path1	novel.3336			TRINITY_DN13319_c0_g2_i3.path1	novel.73	novel.2124
	TRINITY_DN33191_c0_g1_i2.path1	TRINITY_DN20167_c1_g1_i1.path1	novel.1801			TRINITY_DN17502_c0_g3_i1.path2	TRINITY_DN23121_c0_g2_i1.path2	TRINITY_DN16345_c0_g1_i1.path1
	TRINITY_DN115346_c0_g1_i1.path1	TRINITY_DN108168_c0_g1_i1.path1	TRINITY_DN76151_c0_g1_i1.path1			TRINITY_DN8137_c0_g1_i1.path1	TRINITY_DN72136_c0_g1_i1.path1	TRINITY_DN21249_c0_g1_i1.path4
	Pepsico2_Contig18189.path1	TRINITY_DN18833_c0_g3_i1.path1	TRINITY_DN54476_c0_g1_i1.path1			novel.7978	TRINITY_DN22549_c0_g2_i1.path1	TRINITY_DN25384_c0_g1_i1.path1
	novel.5979	TRINITY_DN36770_c2_g1_i1.path2	TRINITY_DN8555_c0_g1_i8.path1			TRINITY_DN33625_c0_g1_i1.path2	TRINITY_DN112419_c0_g1_i1.path1	Pepsico1_Contig36864.path1
	TRINITY_DN8365_c1_g1_i7.path1	Pepsico1_Contig1632.path2	TRINITY_DN40672_c0_g1_i1.path2			Pepsico2_Contig17052.path2	TRINITY_DN4474_c1_g2_i1.path1	novel.1664
	novel.850	novel.5704	TRINITY_DN61961_c0_g1_i1.path1			novel.1185	TRINITY_DN70647_c0_g1_i1.path1	TRINITY_DN32286_c0_g2_i1.path1
	Pepsico2_Contig11507.path1	novel.8280	TRINITY_DN53130_c0_g1_i3.path1			TRINITY_DN1779_c0_g1_i10.path1	novel.8947	TRINITY_DN14561_c0_g1_i11.path1
	TRINITY_DN3251_c0_g1_i1.path1	novel.51	TRINITY_DN9210_c0_g3_i1.path1			TRINITY_DN3070_c1_g1_i2.path2	TRINITY_DN14061_c0_g2_i1.path1	TRINITY_DN90340_c0_g1_i1.path1
	Pepsico1_Contig6629.path1	TRINITY_DN23109_c0_g1_i2.path1	novel.8649			novel.4787	novel.9213	TRINITY_DN18390_c0_g1_i1.path1
	Pepsico2_Contig12685.path2	novel.8144	TRINITY_DN1583_c0_g1_i1.path1			TRINITY_DN15406_c0_g1_i1.path1	Pepsico1_Contig37830.path1	TRINITY_DN51609_c0_g1_i1.path1
	TRINITY_DN108775_c0_g1_i1.path1	Pepsico1_Contig3584.path1	Pepsico1_Contig3638.path2			TRINITY_DN1105_c1_g2_i1.path1	Pepsico2_Contig20350.path1	Pepsico2_Contig19227.path1
	TRINITY_DN7170_c0_g1_i12.path1	TRINITY_DN16283_c0_g2_i1.path1	TRINITY_DN3065_c0_g1_i2.path1			novel.8131	novel.6696	TRINITY_DN40400_c0_g1_i1.path1
	TRINITY_DN81099_c0_g1_i1.path1	TRINITY_DN11470_c0_g1_i1.path1	TRINITY_DN8820_c0_g1_i1.path3			TRINITY_DN14098_c2_g1_i1.path1	novel.4404	Pepsico2_Contig17129.path1
	novel.1308	TRINITY_DN35417_c0_g1_i3.path2	novel.3633			Pepsico1_Contig1944.path1	Pepsico1_Contig5249.path1	TRINITY_DN4204_c0_g1_i1.path1
	Pepsico2_Contig3586.path2	TRINITY_DN30446_c0_g1_i1.path1	Pepsico2_Contig6148.path2			TRINITY_DN772_c1_g1_i2.path1	Pepsico1_Contig332.path2	TRINITY_DN65340_c0_g1_i1.path1
	Pepsico2_Contig17652.path1	TRINITY_DN115544_c0_g1_i1.path1	TRINITY_DN3251_c0_g1_i1.path1			novel.10386	TRINITY_DN31731_c0_g1_i2.path1	TRINITY_DN6144_c0_g2_i2.path1
	novel.4941	novel.2338	TRINITY_DN10223_c0_g1_i1.path1			TRINITY_DN16223_c0_g2_i1.path2	Pepsico1_Contig855.path1	Pepsico1_Contig521.path1
	TRINITY_DN1671_c1_g1_i1.path2	TRINITY_DN49479_c0_g1_i1.path1	novel.1038			TRINITY_DN4613_c0_g1_i2.path1	TRINITY_DN11565_c0_g1_i2.path1	TRINITY_DN50482_c1_g2_i1.path1
	TRINITY_DN26162_c0_g1_i1.path1	TRINITY_DN26262_c0_g1_i1.path2	TRINITY_DN7216_c1_g2_i1.path1			TRINITY_DN17359_c0_g3_i1.path1	TRINITY_DN99982_c0_g1_i1.path2	TRINITY_DN33800_c0_g1_i2.path2
	TRINITY_DN12381_c0_g1_i1.path1	TRINITY_DN22272_c0_g1_i3.path1	novel.2119			TRINITY_DN27219_c0_g1_i7.path1	novel.7441	TRINITY_DN38578_c0_g4_i1.path2
	TRINITY_DN5578_c1_g1_i1.path1	TRINITY_DN12659_c0_g1_i5.path1	TRINITY_DN6144_c0_g2_i2.path2			TRINITY_DN69362_c0_g1_i1.path1	Pepsico1_Contig3049.path1	TRINITY_DN4504_c1_g1_i2.path1
	TRINITY_DN88223_c0_g1_i1.path1	novel.6485	novel.4220			TRINITY_DN25492_c0_g1_i1.path1	TRINITY_DN9201_c0_g1_i1.path1	novel.7782
	TRINITY_DN14198_c0_g1_i1.path1	TRINITY_DN10223_c0_g1_i1.path1	TRINITY_DN103489_c0_g1_i1.path1			novel.5967	Pepsico2_Contig6405.path1	Pepsico1_Contig4614.path1
	Pepsico1_Contig6014.path1	TRINITY_DN44237_c0_g1_i1.path1	TRINITY_DN23885_c1_g1_i1.path1			TRINITY_DN7382_c0_g1_i2.path1	TRINITY_DN15594_c0_g1_i4.path1	TRINITY_DN18524_c0_g1_i1.path1
	Pepsico2_Contig5996.path1	TRINITY_DN25103_c0_g1_i1.path1	novel.2291			TRINITY_DN27388_c0_g3_i3.path1	Pepsico2_Contig4961.path1	TRINITY_DN21095_c0_g1_i1.path1
	TRINITY_DN24976_c0_g1_i1.path1	Pepsico1_Contig892.path1	TRINITY_DN5135_c0_g1_i1.path1			TRINITY_DN353_c0_g1_i2.path1	TRINITY_DN107882_c0_g1_i1.path1	novel.9492
	TRINITY_DN11525_c0_g1_i21.path2	novel.9133	novel.8064			Pepsico2_Contig1979.path1	TRINITY_DN35140_c0_g2_i1.path2	TRINITY_DN16567_c0_g1_i1.path1
	TRINITY_DN100306_c0_g1_i1.path1	TRINITY_DN7242_c0_g1_i2.path1	TRINITY_DN19066_c0_g2_i1.path1			Pepsico2_Contig16041.path1	Pepsico2_Contig12405.path1	TRINITY_DN35887_c1_g1_i1.path3
	TRINITY_DN1938_c0_g1_i1.path1	TRINITY_DN12897_c0_g1_i1.path3	TRINITY_DN28341_c3_g1_i1.path1			TRINITY_DN48591_c0_g1_i1.path4	TRINITY_DN21333_c0_g2_i2.path2	TRINITY_DN59952_c0_g1_i1.path2
	TRINITY_DN10815_c0_g2_i1.path1	novel.4349	TRINITY_DN33951_c0_g1_i1.path1			novel.6380	TRINITY_DN10591_c0_g1_i1.path2	novel.317
	TRINITY_DN4484_c1_g1_i2.path1	TRINITY_DN42395_c0_g3_i1.path1	Pepsico1_Contig34053.path1			TRINITY_DN26590_c0_g1_i1.path1	Pepsico1_Contig1783.path1	TRINITY_DN33940_c0_g1_i1.path1
	TRINITY_DN46999_c0_g1_i1.path1	TRINITY_DN16433_c0_g1_i7.path1	Pepsico1_Contig31958.path1			TRINITY_DN933_c0_g1_i4.path1	novel.4908	TRINITY_DN37827_c0_g1_i1.path1
	TRINITY_DN20194_c0_g2_i7.path1	TRINITY_DN87534_c0_g1_i1.path1	Pepsico2_Contig13724.path2			TRINITY_DN25488_c0_g1_i10.path2	TRINITY_DN99485_c0_g1_i1.path1	TRINITY_DN40672_c0_g1_i1.path1
	novel.954	novel.4904	TRINITY_DN7190_c0_g3_i1.path1			TRINITY_DN83758_c0_g1_i1.path1	TRINITY_DN15449_c0_g1_i1.path1	TRINITY_DN31787_c0_g1_i2.path2
	Pepsico1_Contig32296.path2	Pepsico1_Contig4053.path1	TRINITY_DN7214_c0_g3_i2.path2			TRINITY_DN61198_c0_g1_i1.path1	Pepsico2_Contig18850.path1	novel.7423
	TRINITY_DN52469_c0_g1_i1.path1	TRINITY_DN9400_c0_g1_i4.path3	TRINITY_DN40344_c0_g1_i1.path1			TRINITY_DN53496_c0_g1_i1.path1	novel.2733	TRINITY_DN38578_c0_g4_i1.path1
	novel.848	TRINITY_DN12040_c0_g2_i1.path1	TRINITY_DN13925_c1_g1_i1.path1			TRINITY_DN8622_c0_g3_i1.path1	TRINITY_DN73578_c0_g1_i1.path1	TRINITY_DN33717_c1_g2_i3.path1
	Pepsico2_Contig6097.path1	TRINITY_DN14625_c0_g4_i1.path1	Pepsico2_Contig2518.path2			TRINITY_DN37925_c0_g4_i1.path1	Pepsico2_Contig638.path1	Pepsico2_Contig17956.path1
	TRINITY_DN3664_c0_g3_i1.path1	Pepsico2_Contig2134.path1	TRINITY_DN13603_c0_g1_i2.path1			TRINITY_DN10123_c0_g5_i1.path1	Pepsico1_Contig1321.path2	TRINITY_DN107692_c0_g1_i1.path1
	TRINITY_DN32509_c0_g1_i2.path1	novel.2689	TRINITY_DN2864_c0_g1_i5.path2			TRINITY_DN25749_c0_g1_i1.path1	TRINITY_DN22145_c0_g1_i2.path1	TRINITY_DN6991_c0_g1_i1.path1
	Pepsico1_Contig6934.path1	TRINITY_DN27295_c0_g1_i1.path1	TRINITY_DN12617_c0_g2_i5.path1			TRINITY_DN24786_c0_g1_i1.path2	Pepsico1_Contig579.path1	TRINITY_DN2864_c0_g1_i5.path2
	TRINITY_DN80889_c0_g1_i1.path1	TRINITY_DN45866_c0_g1_i1.path1	TRINITY_DN96972_c0_g1_i1.path1			TRINITY_DN11511_c0_g3_i2.path1	Pepsico1_Contig1503.path1	TRINITY_DN20815_c0_g2_i1.path2
	Pepsico1_Contig8151.path1	Pepsico1_Contig1940.path1	TRINITY_DN19513_c1_g1_i2.path1			TRINITY_DN15272_c1_g1_i1.path1	TRINITY_DN54370_c0_g1_i3.path1	Pepsico2_Contig2980.path1
	Pepsico2_Contig8757.path1	TRINITY_DN26545_c0_g1_i1.path2	TRINITY_DN17095_c0_g1_i2.path1			novel.7011	TRINITY_DN31572_c0_g1_i1.path1	TRINITY_DN2377_c0_g1_i1.path1
	TRINITY_DN4404_c0_g1_i7.path1	Pepsico1_Contig5817.path1	TRINITY_DN85833_c0_g1_i1.path1			TRINITY_DN4774_c0_g1_i2.path2	TRINITY_DN79384_c0_g1_i1.path1	Pepsico1_Contig325.path1
	TRINITY_DN33617_c0_g1_i1.path1	TRINITY_DN20545_c0_g2_i1.path1	TRINITY_DN16919_c0_g1_i2.path1			Pepsico1_Contig5497.path1	TRINITY_DN88385_c0_g1_i1.path1	TRINITY_DN11076_c0_g1_i1.path2
	TRINITY_DN1859_c0_g1_i13.path1	TRINITY_DN11345_c0_g1_i3.path2	TRINITY_DN13348_c0_g1_i7.path1			TRINITY_DN6047_c0_g2_i3.path1	TRINITY_DN18686_c0_g1_i1.path1	TRINITY_DN90723_c0_g1_i1.path1
	Pepsico2_Contig3312.path1	TRINITY_DN62134_c5_g1_i1.path1	novel.6890			Pepsico1_Contig3469.path2	TRINITY_DN35511_c0_g2_i1.path1	novel.446
	novel.8810	TRINITY_DN2414_c0_g2_i1.path1	Pepsico2_Contig971.path1			TRINITY_DN17904_c0_g1_i4.path1	TRINITY_DN24672_c0_g1_i3.path1	TRINITY_DN4529_c1_g1_i1.path2
	TRINITY_DN83016_c0_g1_i1.path1	Pepsico2_Contig16765.path1	novel.2380			Pepsico1_Contig1880.path1	TRINITY_DN15150_c0_g3_i4.path1	TRINITY_DN71827_c0_g1_i1.path1
	TRINITY_DN47813_c0_g1_i1.path1	TRINITY_DN15011_c0_g1_i1.path1	TRINITY_DN19898_c0_g2_i1.path1			TRINITY_DN14314_c0_g2_i2.path1	TRINITY_DN88019_c0_g1_i1.path1	TRINITY_DN25713_c0_g1_i1.path1
	TRINITY_DN83983_c0_g1_i1.path1	TRINITY_DN32977_c0_g2_i1.path1	Pepsico1_Contig28503.path1			TRINITY_DN1212_c0_g1_i1.path1	novel.4819	TRINITY_DN112740_c0_g1_i1.path1
	Pepsico2_Contig8726.path1	TRINITY_DN16510_c0_g1_i1.path2	Pepsico1_Contig2444.path1			TRINITY_DN48954_c0_g1_i1.path1	TRINITY_DN3075_c1_g1_i2.path2	TRINITY_DN22092_c0_g1_i2.path1
	TRINITY_DN397_c0_g2_i1.path1	TRINITY_DN8003_c0_g2_i1.path1	novel.1855			TRINITY_DN21218_c0_g2_i1.path1	TRINITY_DN15475_c0_g1_i1.path1	novel.3557
	novel.2690	novel.4908	novel.6575			TRINITY_DN14278_c0_g1_i1.path1	novel.10217	TRINITY_DN13705_c0_g4_i1.path1
	TRINITY_DN308_c0_g1_i1.path1	novel.7503	TRINITY_DN49915_c0_g1_i1.path1			Pepsico2_Contig12416.path1	TRINITY_DN31382_c1_g1_i1.path1	novel.9302
	TRINITY_DN105515_c0_g1_i1.path1	TRINITY_DN47666_c0_g1_i1.path1	Pepsico2_Contig3635.path1			TRINITY_DN22793_c0_g1_i6.path1	TRINITY_DN59441_c0_g1_i2.path1	Pepsico2_Contig14344.path1
	TRINITY_DN5621_c0_g3_i1.path1	TRINITY_DN27615_c0_g1_i1.path1	Pepsico2_Contig4152.path1			TRINITY_DN33920_c1_g1_i1.path1	Pepsico2_Contig4262.path1	TRINITY_DN11477_c0_g1_i7.path1
	TRINITY_DN11041_c0_g2_i1.path1	Pepsico2_Contig1815.path1	novel.178			TRINITY_DN30535_c0_g3_i1.path1	TRINITY_DN18478_c0_g1_i1.path1	TRINITY_DN3664_c0_g3_i1.path2
	TRINITY_DN20381_c0_g1_i4.path1	TRINITY_DN27335_c0_g1_i1.path1	novel.1776			TRINITY_DN6193_c0_g1_i1.path1	Pepsico1_Contig71.path1	novel.8780
	TRINITY_DN13499_c0_g1_i1.path1	TRINITY_DN110828_c0_g1_i1.path1	TRINITY_DN44436_c1_g1_i1.path1			novel.9961	TRINITY_DN33623_c0_g1_i3.path1	TRINITY_DN33761_c0_g1_i2.path1
	TRINITY_DN84840_c0_g1_i1.path1	TRINITY_DN108193_c0_g1_i1.path1	TRINITY_DN47947_c0_g1_i1.path1			Pepsico1_Contig4403.path2	TRINITY_DN23109_c0_g1_i2.path1	Pepsico2_Contig4681.path1
	TRINITY_DN63300_c0_g1_i1.path1	TRINITY_DN40719_c2_g1_i1.path1	TRINITY_DN94157_c0_g1_i1.path1			Pepsico2_Contig16525.path1	novel.9464	novel.1849
	TRINITY_DN51712_c0_g1_i1.path1	Pepsico1_Contig3024.path1	TRINITY_DN43074_c0_g1_i1.path1			Pepsico1_Contig24518.path1	TRINITY_DN32690_c0_g2_i1.path1	TRINITY_DN359_c1_g1_i1.path4
	Pepsico2_Contig14785.path1	novel.5334	novel.4607			novel.7516	TRINITY_DN22092_c0_g1_i2.path1	TRINITY_DN70882_c0_g1_i1.path1
	novel.6786	Pepsico2_Contig1038.path1	novel.5764			TRINITY_DN51830_c0_g1_i1.path1	Pepsico2_Contig6624.path1	TRINITY_DN10806_c1_g3_i2.path2
	TRINITY_DN13681_c2_g1_i1.path2	Pepsico1_Contig28425.path2	TRINITY_DN6942_c0_g1_i2.path1			TRINITY_DN38680_c0_g1_i1.path1	TRINITY_DN34544_c0_g1_i2.path1	Pepsico1_Contig6029.path1
	TRINITY_DN33940_c0_g1_i1.path1	novel.10007	TRINITY_DN115346_c0_g1_i1.path1			TRINITY_DN26214_c0_g1_i2.path2	TRINITY_DN45877_c0_g1_i1.path1	Pepsico1_Contig3446.path2
	novel.9912	Pepsico2_Contig18331.path1	novel.6716			TRINITY_DN6065_c0_g3_i1.path1	TRINITY_DN92919_c0_g1_i1.path1	Pepsico2_Contig8026.path1
	TRINITY_DN97533_c0_g1_i1.path2	Pepsico2_Contig21203.path1	novel.933			novel.3212	Pepsico2_Contig7659.path1	Pepsico2_Contig19387.path1
	TRINITY_DN11282_c2_g1_i1.path1	TRINITY_DN40344_c0_g1_i1.path1	Pepsico1_Contig7048.path1			TRINITY_DN50482_c1_g2_i1.path1	TRINITY_DN28094_c0_g1_i2.path1	TRINITY_DN475_c0_g1_i14.path1
	TRINITY_DN56948_c0_g1_i1.path1	TRINITY_DN33305_c0_g3_i1.path1	novel.3882			TRINITY_DN22643_c0_g2_i1.path2	TRINITY_DN6193_c0_g1_i1.path1	Pepsico2_Contig781.path1
	novel.10107	TRINITY_DN59680_c0_g1_i1.path1	novel.3543			TRINITY_DN4885_c0_g3_i1.path1	TRINITY_DN1326_c0_g1_i3.path1	Pepsico2_Contig12405.path1
	TRINITY_DN15272_c1_g1_i1.path2	TRINITY_DN15240_c0_g1_i3.path1	TRINITY_DN5010_c0_g1_i1.path1			TRINITY_DN9635_c0_g1_i7.path1	Pepsico2_Contig19816.path1	TRINITY_DN105452_c0_g1_i1.path2
	novel.6272	Pepsico1_Contig66.path1	novel.3393			TRINITY_DN11155_c0_g1_i2.path1	TRINITY_DN66014_c0_g1_i1.path1	novel.5930
	TRINITY_DN241_c0_g2_i1.path1	TRINITY_DN38392_c0_g1_i11.path1	TRINITY_DN4027_c2_g1_i1.path2			TRINITY_DN22791_c0_g2_i1.path1	TRINITY_DN4207_c0_g1_i1.path1	TRINITY_DN52947_c0_g1_i1.path1
	TRINITY_DN29924_c0_g1_i1.path1	TRINITY_DN24347_c0_g1_i2.path1	Pepsico2_Contig17956.path1			novel.3694	TRINITY_DN321_c2_g1_i4.path1	TRINITY_DN6342_c0_g2_i15.path1
	novel.7329	TRINITY_DN15905_c1_g1_i1.path2	TRINITY_DN40699_c0_g1_i1.path1			Pepsico2_Contig2132.path1	novel.5243	TRINITY_DN16038_c0_g2_i1.path1
	novel.6690	TRINITY_DN42306_c0_g1_i3.path1	Pepsico2_Contig5083.path1			TRINITY_DN50089_c0_g1_i4.path1	TRINITY_DN24079_c0_g1_i1.path1	TRINITY_DN6365_c0_g1_i3.path1
	TRINITY_DN12176_c0_g1_i8.path3	Pepsico1_Contig3270.path1	novel.266			TRINITY_DN25242_c0_g1_i2.path1	TRINITY_DN60125_c0_g1_i1.path1	TRINITY_DN21706_c0_g1_i3.path1
	TRINITY_DN29122_c0_g1_i2.path1	Pepsico1_Contig601.path1	novel.9109			Pepsico2_Contig15617.path1	Pepsico2_Contig14783.path1	TRINITY_DN10123_c0_g2_i1.path1
	TRINITY_DN41786_c0_g1_i3.path1	TRINITY_DN475_c0_g1_i14.path1	TRINITY_DN16600_c0_g1_i6.path1			TRINITY_DN89953_c0_g1_i1.path1	TRINITY_DN52025_c0_g2_i1.path2	Pepsico1_Contig1247.path1
	Pepsico2_Contig9464.path1	TRINITY_DN68885_c0_g1_i1.path1	Pepsico2_Contig10389.path1			TRINITY_DN57099_c0_g1_i2.path1	novel.504	TRINITY_DN36632_c0_g1_i1.path1
	Pepsico2_Contig5536.path1	Pepsico2_Contig16982.path2	novel.9659			Pepsico2_Contig19393.path1	Pepsico2_Contig18163.path1	TRINITY_DN12872_c0_g1_i1.path1
	TRINITY_DN44824_c0_g1_i1.path3	novel.3805	TRINITY_DN10348_c0_g3_i1.path1			novel.7184	TRINITY_DN1212_c0_g1_i1.path1	TRINITY_DN8445_c0_g1_i4.path2
	TRINITY_DN739_c0_g1_i2.path1	TRINITY_DN13964_c0_g2_i1.path1	Pepsico1_Contig3087.path1			TRINITY_DN97549_c0_g1_i1.path1	TRINITY_DN58751_c0_g1_i1.path1	TRINITY_DN95829_c0_g1_i1.path1
	Pepsico1_Contig6507.path1	Pepsico1_Contig3638.path2	Pepsico2_Contig13308.path1			TRINITY_DN26268_c0_g2_i2.path1	novel.2412	TRINITY_DN37868_c0_g1_i1.path1
	TRINITY_DN5232_c0_g1_i7.path1	novel.8529	TRINITY_DN39633_c0_g1_i2.path1			novel.6560	TRINITY_DN28064_c0_g2_i2.path1	TRINITY_DN5293_c0_g1_i2.path2
	TRINITY_DN15240_c0_g1_i3.path1	TRINITY_DN34598_c0_g1_i2.path1	Pepsico1_Contig3831.path2			TRINITY_DN29812_c0_g1_i2.path1	TRINITY_DN2977_c0_g1_i11.path2	Pepsico2_Contig6752.path1
	TRINITY_DN29964_c0_g3_i1.path1	TRINITY_DN88478_c0_g1_i1.path1	TRINITY_DN24825_c0_g4_i2.path1			TRINITY_DN43440_c0_g1_i1.path1	Pepsico2_Contig19940.path1	Pepsico2_Contig13865.path1
	TRINITY_DN37904_c0_g1_i5.path1	Pepsico2_Contig3317.path1	TRINITY_DN11705_c0_g1_i1.path1			TRINITY_DN5135_c0_g1_i1.path1	TRINITY_DN79055_c0_g1_i1.path1	novel.1479
	TRINITY_DN73748_c0_g1_i1.path1	novel.4447	Pepsico2_Contig17483.path1			TRINITY_DN43323_c0_g4_i1.path1	Pepsico1_Contig552.path1	novel.380
	TRINITY_DN112536_c0_g1_i1.path1	novel.8649	novel.3720			TRINITY_DN55161_c0_g1_i1.path3	TRINITY_DN9773_c0_g2_i1.path1	novel.1857
	TRINITY_DN113_c1_g1_i1.path1	TRINITY_DN18061_c0_g1_i1.path1	Pepsico1_Contig3842.path2			TRINITY_DN47229_c0_g1_i1.path1	TRINITY_DN5288_c0_g1_i1.path1	TRINITY_DN79055_c0_g1_i1.path1
	TRINITY_DN88329_c0_g1_i1.path1	TRINITY_DN16351_c0_g1_i2.path1	Pepsico2_Contig7223.path1			TRINITY_DN60146_c0_g1_i1.path1	TRINITY_DN37102_c0_g1_i2.path1	TRINITY_DN324_c0_g2_i1.path1
	TRINITY_DN47947_c0_g1_i1.path1	novel.3814	TRINITY_DN45866_c0_g1_i1.path1			TRINITY_DN17080_c0_g2_i1.path1	TRINITY_DN29734_c0_g1_i9.path1	Pepsico2_Contig12375.path1
	TRINITY_DN49735_c0_g1_i1.path1	Pepsico1_Contig36310.path1	TRINITY_DN7736_c1_g1_i3.path1			TRINITY_DN36206_c0_g1_i1.path1	TRINITY_DN23955_c0_g1_i1.path1	TRINITY_DN26292_c0_g1_i1.path1
	Pepsico1_Contig395.path1	novel.6950	TRINITY_DN111443_c0_g1_i1.path1			TRINITY_DN33202_c0_g1_i2.path1	TRINITY_DN16522_c0_g1_i3.path2	TRINITY_DN15198_c0_g2_i2.path1
	TRINITY_DN23998_c0_g1_i6.path1	TRINITY_DN21470_c0_g1_i2.path2	novel.3987			TRINITY_DN36632_c0_g1_i1.path1	novel.4804	TRINITY_DN25186_c0_g1_i1.path2
	TRINITY_DN33165_c0_g2_i1.path1	Pepsico1_Contig38046.path1	novel.2052			Pepsico1_Contig7009.path1	TRINITY_DN1916_c1_g1_i1.path1	TRINITY_DN55600_c0_g1_i1.path1
	TRINITY_DN11195_c1_g1_i1.path2	Pepsico2_Contig12882.path1	novel.4985			TRINITY_DN30789_c0_g2_i1.path1	TRINITY_DN45040_c0_g2_i1.path2	TRINITY_DN3065_c0_g1_i2.path1
	TRINITY_DN27841_c0_g1_i1.path1	Pepsico2_Contig14588.path1	TRINITY_DN18259_c0_g1_i1.path1			Pepsico2_Contig4734.path2	TRINITY_DN22677_c0_g2_i1.path2	TRINITY_DN25727_c0_g1_i1.path1
	TRINITY_DN29528_c0_g2_i2.path1	TRINITY_DN33442_c0_g2_i3.path1	Pepsico1_Contig32441.path2			TRINITY_DN88275_c0_g1_i1.path1	novel.5384	novel.1001
	novel.2212	novel.2092	novel.2713			TRINITY_DN10280_c0_g1_i1.path1	TRINITY_DN8925_c0_g1_i1.path1	Pepsico2_Contig4893.path1
	TRINITY_DN38172_c0_g1_i3.path1	novel.288	TRINITY_DN160_c1_g1_i4.path1			TRINITY_DN106967_c0_g1_i2.path1	TRINITY_DN19967_c0_g1_i9.path1	Pepsico2_Contig7679.path2
	TRINITY_DN36965_c0_g1_i2.path1	TRINITY_DN12004_c0_g1_i1.path1	novel.811			TRINITY_DN7307_c0_g1_i1.path1	TRINITY_DN684_c1_g1_i1.path1	novel.4349
	TRINITY_DN22464_c0_g1_i3.path1	novel.10459	TRINITY_DN33890_c0_g1_i3.path1			TRINITY_DN33783_c0_g2_i1.path1	TRINITY_DN19855_c0_g2_i1.path1	novel.4671
	TRINITY_DN23813_c0_g1_i3.path1	Pepsico2_Contig6425.path1	novel.7894			Pepsico2_Contig18089.path1	TRINITY_DN91140_c0_g1_i1.path2	TRINITY_DN39059_c0_g1_i1.path1
	TRINITY_DN10066_c1_g2_i1.path1	TRINITY_DN16314_c0_g1_i3.path1	Pepsico2_Contig4893.path1			novel.6722	TRINITY_DN28232_c0_g1_i2.path1	TRINITY_DN34205_c0_g1_i1.path2
	TRINITY_DN40548_c0_g1_i1.path1	TRINITY_DN24358_c0_g1_i5.path1	TRINITY_DN36003_c0_g1_i1.path1			TRINITY_DN58833_c0_g1_i1.path1	Pepsico1_Contig325.path1	TRINITY_DN76361_c0_g1_i1.path1
	TRINITY_DN14202_c0_g3_i2.path1	TRINITY_DN9186_c0_g1_i1.path1	Pepsico2_Contig20002.path1			Pepsico1_Contig325.path1	Pepsico2_Contig20569.path2	TRINITY_DN22567_c0_g1_i1.path1
	TRINITY_DN64115_c0_g1_i2.path1	Pepsico1_Contig4341.path1	novel.5917			novel.3005	Pepsico2_Contig2980.path1	TRINITY_DN98409_c0_g1_i1.path1
	novel.8954	TRINITY_DN17413_c0_g4_i2.path1	Pepsico2_Contig19191.path1			TRINITY_DN35718_c0_g2_i4.path1	novel.1856	Pepsico2_Contig3141.path1
	novel.4836	TRINITY_DN63224_c0_g1_i1.path1	Pepsico2_Contig17764.path1			TRINITY_DN97683_c0_g1_i1.path1	TRINITY_DN11282_c1_g2_i1.path1	novel.5499
	TRINITY_DN59825_c0_g1_i1.path1	novel.6836	TRINITY_DN1983_c3_g1_i1.path1			Pepsico2_Contig14392.path1	novel.5410	TRINITY_DN13908_c0_g4_i1.path1
	TRINITY_DN17801_c0_g1_i4.path1	TRINITY_DN47281_c0_g1_i1.path1	TRINITY_DN32500_c0_g1_i1.path1			novel.7887	TRINITY_DN59952_c0_g1_i1.path2	novel.4031
	novel.42	TRINITY_DN15870_c0_g1_i3.path1	TRINITY_DN19547_c0_g1_i2.path1			TRINITY_DN35511_c0_g2_i1.path1	novel.9146	Pepsico1_Contig38028.path1
	Pepsico2_Contig6636.path1	Pepsico2_Contig4608.path3	novel.8249			TRINITY_DN110684_c0_g1_i1.path1	novel.7701	TRINITY_DN18448_c0_g1_i2.path1
	TRINITY_DN28755_c0_g1_i1.path1	TRINITY_DN12758_c1_g2_i1.path3	TRINITY_DN5180_c1_g3_i1.path1			TRINITY_DN44114_c0_g2_i1.path1	TRINITY_DN36731_c0_g1_i1.path1	Pepsico1_Contig37105.path1
	TRINITY_DN102485_c0_g1_i1.path1	TRINITY_DN17095_c0_g1_i2.path2	TRINITY_DN11167_c2_g1_i1.path1			TRINITY_DN8311_c0_g1_i1.path2	novel.5067	Pepsico2_Contig12841.path2
	TRINITY_DN6613_c0_g1_i6.path1	TRINITY_DN113_c1_g1_i1.path1	Pepsico2_Contig6015.path1			novel.5410	TRINITY_DN51761_c3_g2_i3.path1	TRINITY_DN78446_c0_g1_i1.path1
	novel.9200	TRINITY_DN65056_c0_g1_i1.path2	TRINITY_DN14784_c0_g1_i1.path1			novel.9331	TRINITY_DN78921_c0_g1_i1.path1	TRINITY_DN16572_c0_g2_i2.path1
	Pepsico1_Contig47.path2	Pepsico2_Contig8389.path1	TRINITY_DN40497_c1_g1_i1.path1			Pepsico1_Contig4614.path1	TRINITY_DN5135_c0_g1_i1.path2	novel.263
	novel.2096	novel.446	Pepsico1_Contig601.path1			TRINITY_DN4532_c1_g2_i1.path1	TRINITY_DN68934_c0_g1_i1.path1	Pepsico2_Contig19596.path1
	TRINITY_DN87814_c0_g1_i1.path1	novel.3835	TRINITY_DN11406_c0_g1_i1.path1			TRINITY_DN14495_c0_g1_i2.path2	TRINITY_DN324_c0_g2_i1.path1	TRINITY_DN29565_c0_g1_i3.path3
	TRINITY_DN35511_c2_g1_i1.path1	Pepsico1_Contig3100.path2	Pepsico2_Contig16125.path1			TRINITY_DN26371_c0_g1_i1.path1	TRINITY_DN15375_c0_g1_i2.path1	TRINITY_DN31572_c0_g2_i1.path1
	TRINITY_DN40941_c1_g1_i1.path1	novel.335	Pepsico2_Contig9151.path1			TRINITY_DN34099_c0_g1_i2.path1	TRINITY_DN27817_c0_g1_i1.path1	novel.1745
	TRINITY_DN16151_c0_g4_i1.path1	TRINITY_DN108784_c0_g1_i1.path1	TRINITY_DN52489_c0_g2_i1.path1			novel.4663	Pepsico1_Contig1944.path1	TRINITY_DN15878_c0_g1_i6.path2
[truncated: 7,297 more rows]

## Sheet: DOWN
BY2vsBY1	BY3vsBY1	BY4vsBY1	BY5vsBY1		DY2vsDY1	DY3vsDY1	DY4vsDY1	DY5vsDY1
Pepsico1_Contig1046.path1	Pepsico1_Contig585.path1	TRINITY_DN24505_c0_g1_i1.path1	Pepsico2_Contig1790.path2		Pepsico1_Contig2013.path1	Pepsico1_Contig26692.path1	novel.3995	novel.1582
TRINITY_DN61132_c0_g1_i1.path1	TRINITY_DN9136_c0_g1_i2.path1	Pepsico1_Contig836.path1	TRINITY_DN24505_c0_g1_i1.path1		novel.7004	TRINITY_DN3393_c0_g1_i2.path1	novel.7004	TRINITY_DN12917_c0_g1_i1.path1
novel.8359	TRINITY_DN9696_c0_g1_i1.path1	novel.3063	TRINITY_DN14545_c0_g1_i1.path2		novel.4909	TRINITY_DN1122_c0_g2_i1.path1	novel.1582	novel.3530
novel.7148	TRINITY_DN6009_c0_g1_i6.path1	Pepsico2_Contig14131.path2	novel.3063		Pepsico1_Contig92.path1	novel.7004	TRINITY_DN3180_c0_g2_i1.path1	TRINITY_DN3393_c0_g1_i2.path1
TRINITY_DN7772_c0_g1_i4.path1	TRINITY_DN14545_c0_g1_i1.path2	Pepsico2_Contig1790.path2	TRINITY_DN15602_c0_g1_i1.path1		TRINITY_DN14937_c0_g1_i2.path2	TRINITY_DN97784_c0_g1_i1.path1	TRINITY_DN3180_c0_g2_i1.path2	novel.3995
novel.5452	novel.1671	novel.8145	novel.3995		TRINITY_DN21323_c0_g1_i1.path1	TRINITY_DN21343_c0_g1_i4.path2	TRINITY_DN12917_c0_g1_i1.path1	novel.7004
novel.3521	TRINITY_DN10471_c0_g2_i1.path1	novel.2619	novel.9233		novel.4365	TRINITY_DN36833_c1_g1_i1.path1	novel.4714	TRINITY_DN12747_c0_g1_i1.path1
Pepsico1_Contig1034.path1	novel.9233	TRINITY_DN3469_c0_g1_i3.path1	novel.8145		TRINITY_DN6768_c0_g1_i1.path2	TRINITY_DN21343_c0_g1_i4.path1	TRINITY_DN1387_c0_g1_i2.path1	Pepsico1_Contig6901.path2
novel.1107	novel.3995	novel.3995	Pepsico2_Contig3304.path1		novel.4940	TRINITY_DN10389_c0_g1_i1.path2	TRINITY_DN47113_c0_g3_i1.path1	TRINITY_DN46218_c0_g1_i1.path1
TRINITY_DN7691_c0_g1_i1.path2	TRINITY_DN97496_c0_g1_i1.path1	Pepsico2_Contig14131.path1	TRINITY_DN3469_c0_g1_i3.path1		TRINITY_DN7357_c0_g2_i1.path1	TRINITY_DN10389_c0_g1_i1.path1	TRINITY_DN7356_c0_g1_i8.path1	Pepsico1_Contig7353.path1
TRINITY_DN8956_c0_g2_i2.path1	Pepsico1_Contig1046.path1	novel.4714	TRINITY_DN34766_c0_g1_i6.path1		novel.741	TRINITY_DN30939_c0_g1_i2.path1	TRINITY_DN3393_c0_g1_i2.path1	Pepsico2_Contig1790.path2
TRINITY_DN8602_c0_g1_i4.path1	TRINITY_DN3469_c0_g1_i3.path1	TRINITY_DN14545_c0_g1_i1.path2	TRINITY_DN11598_c0_g1_i1.path1		Pepsico1_Contig4300.path1	novel.9555	TRINITY_DN1387_c0_g1_i2.path2	novel.5717
TRINITY_DN7691_c0_g4_i1.path1	TRINITY_DN23642_c0_g1_i4.path1	TRINITY_DN10605_c0_g1_i2.path1	Pepsico1_Contig585.path1		TRINITY_DN17168_c0_g5_i1.path1	novel.4608	novel.7791	Pepsico1_Contig1046.path1
TRINITY_DN9696_c0_g1_i1.path1	TRINITY_DN4498_c0_g1_i10.path1	TRINITY_DN4494_c0_g2_i2.path1	Pepsico1_Contig743.path1		novel.4585	Pepsico1_Contig4300.path1	Pepsico2_Contig27.path1	Pepsico2_Contig3304.path1
TRINITY_DN5482_c0_g1_i1.path2	TRINITY_DN7691_c0_g4_i1.path1	TRINITY_DN6047_c1_g1_i1.path1	novel.6168		Pepsico1_Contig4128.path1	TRINITY_DN12747_c0_g1_i1.path1	novel.4602	TRINITY_DN7691_c0_g4_i1.path1
TRINITY_DN14877_c0_g1_i2.path1	novel.4714	novel.7508	novel.1671		TRINITY_DN3393_c0_g1_i2.path1	TRINITY_DN9952_c0_g3_i1.path1	Pepsico2_Contig11289.path2	TRINITY_DN3180_c0_g2_i1.path1
Pepsico2_Contig1721.path1	TRINITY_DN12747_c0_g1_i1.path1	TRINITY_DN12952_c0_g4_i1.path1	Pepsico1_Contig185.path1		novel.8009	TRINITY_DN3180_c0_g2_i1.path2	TRINITY_DN46218_c0_g1_i1.path1	Pepsico2_Contig2387.path1
TRINITY_DN7687_c0_g1_i2.path1	novel.6652	Pepsico2_Contig3304.path1	TRINITY_DN751_c0_g1_i3.path2		novel.9624	TRINITY_DN17168_c0_g3_i1.path2	novel.5717	Pepsico1_Contig1534.path1
Pepsico2_Contig1768.path1	TRINITY_DN4_c0_g1_i6.path1	Pepsico2_Contig8556.path2	Pepsico1_Contig2258.path2		TRINITY_DN42762_c0_g1_i1.path3	novel.7540	TRINITY_DN7691_c1_g1_i3.path1	novel.1671
TRINITY_DN10709_c0_g1_i3.path1	novel.1582	novel.6652	Pepsico1_Contig836.path1		TRINITY_DN17273_c0_g1_i1.path1	TRINITY_DN3180_c0_g2_i1.path1	novel.9973	Pepsico1_Contig1320.path1
TRINITY_DN7819_c0_g1_i1.path1	Pepsico2_Contig2387.path1	novel.5923	Pepsico2_Contig10474.path1		TRINITY_DN49408_c0_g1_i1.path1	TRINITY_DN45534_c0_g1_i1.path3	novel.9233	Pepsico1_Contig743.path1
TRINITY_DN12747_c0_g1_i1.path1	Pepsico2_Contig1768.path1	novel.9909	novel.1582		novel.10002	Pepsico2_Contig5121.path1	Pepsico2_Contig2387.path1	TRINITY_DN7691_c0_g5_i1.path1
TRINITY_DN30939_c0_g1_i2.path1	TRINITY_DN14594_c0_g1_i1.path2	TRINITY_DN10471_c0_g2_i1.path2	Pepsico2_Contig2387.path1		novel.3530	novel.3530	novel.5923	TRINITY_DN23079_c0_g1_i1.path1
novel.7593	TRINITY_DN10471_c0_g2_i1.path2	TRINITY_DN16150_c0_g1_i1.path1	TRINITY_DN7981_c0_g2_i2.path1		Pepsico1_Contig4464.path1	TRINITY_DN11985_c0_g1_i1.path2	TRINITY_DN29073_c0_g1_i3.path2	TRINITY_DN1387_c0_g1_i2.path1
TRINITY_DN12917_c0_g1_i1.path1	Pepsico1_Contig2258.path2	TRINITY_DN2833_c0_g2_i1.path1	novel.258		TRINITY_DN17732_c0_g6_i1.path1	novel.741	Pepsico1_Contig1037.path1	Pepsico2_Contig4966.path2
Pepsico2_Contig19415.path1	Pepsico2_Contig14131.path2	TRINITY_DN15602_c0_g1_i1.path1	TRINITY_DN22284_c0_g2_i1.path1		novel.9752	novel.5776	Pepsico1_Contig1320.path1	Pepsico1_Contig2094.path1
TRINITY_DN46218_c0_g1_i1.path1	TRINITY_DN14167_c0_g1_i1.path1	novel.8071	novel.1476		novel.1374	novel.9624	TRINITY_DN2833_c0_g2_i1.path1	Pepsico1_Contig2960.path1
TRINITY_DN7819_c0_g1_i1.path2	novel.5652	TRINITY_DN24759_c0_g1_i3.path1	novel.5452		novel.3033	novel.9456	Pepsico1_Contig5029.path1	novel.7791
novel.4714	novel.193	TRINITY_DN5767_c0_g1_i5.path1	novel.3530		TRINITY_DN15215_c0_g1_i1.path1	Pepsico1_Contig1064.path2	novel.8359	novel.3033
Pepsico2_Contig10795.path1	novel.5923	TRINITY_DN10035_c0_g1_i1.path1	TRINITY_DN5562_c0_g1_i5.path1		TRINITY_DN17072_c0_g1_i4.path2	TRINITY_DN29903_c0_g1_i2.path1	novel.4354	novel.9846
novel.5044	novel.7508	Pepsico2_Contig10474.path1	TRINITY_DN10035_c0_g1_i1.path1		TRINITY_DN104219_c0_g1_i1.path1	TRINITY_DN17466_c0_g1_i1.path1	novel.5652	TRINITY_DN4498_c0_g1_i10.path1
TRINITY_DN15095_c0_g1_i1.path1	novel.7791	novel.6168	novel.6652		Pepsico1_Contig1037.path1	Pepsico1_Contig921.path2	Pepsico2_Contig14533.path1	novel.7593
novel.5177	Pepsico2_Contig10474.path1	TRINITY_DN9136_c0_g1_i2.path1	Pepsico1_Contig3224.path1		novel.3796	TRINITY_DN19018_c0_g1_i1.path1	novel.7593	Pepsico1_Contig35948.path1
TRINITY_DN17273_c0_g1_i1.path1	TRINITY_DN5562_c0_g1_i5.path1	novel.5452	novel.2619		novel.9895	TRINITY_DN11954_c0_g1_i6.path2	TRINITY_DN10035_c0_g1_i1.path1	TRINITY_DN9136_c0_g1_i2.path1
TRINITY_DN10709_c0_g1_i3.path2	Pepsico1_Contig185.path1	TRINITY_DN12952_c0_g5_i1.path1	novel.5923		TRINITY_DN100548_c0_g1_i1.path1	novel.8211	Pepsico1_Contig2960.path1	TRINITY_DN2833_c0_g2_i1.path1
Pepsico1_Contig2142.path1	TRINITY_DN9136_c1_g3_i1.path1	TRINITY_DN8956_c0_g2_i2.path1	novel.7791		TRINITY_DN32090_c0_g2_i1.path1	TRINITY_DN74782_c0_g1_i1.path1	TRINITY_DN7691_c0_g1_i1.path1	TRINITY_DN24316_c0_g1_i3.path1
Pepsico2_Contig11289.path2	TRINITY_DN7691_c1_g1_i3.path1	TRINITY_DN24907_c0_g1_i4.path1	Pepsico1_Contig2134.path1		TRINITY_DN17168_c0_g3_i1.path2	novel.8732	TRINITY_DN7691_c0_g4_i1.path1	Pepsico2_Contig14533.path1
TRINITY_DN15040_c0_g1_i1.path1	Pepsico2_Contig1790.path2	TRINITY_DN34766_c0_g1_i6.path1	TRINITY_DN97496_c0_g1_i1.path1		novel.5418	Pepsico1_Contig1064.path1	Pepsico1_Contig836.path1	TRINITY_DN8500_c0_g1_i2.path1
Pepsico1_Contig5029.path1	novel.7044	TRINITY_DN15095_c0_g1_i1.path1	TRINITY_DN55287_c0_g1_i1.path3		novel.4436	novel.10131	TRINITY_DN1105_c0_g1_i2.path1	TRINITY_DN1387_c0_g1_i2.path2
Pepsico1_Contig1037.path1	TRINITY_DN11598_c0_g1_i1.path1	Pepsico2_Contig2387.path1	TRINITY_DN9136_c0_g1_i2.path1		TRINITY_DN496_c0_g1_i1.path1	novel.9895	TRINITY_DN97496_c0_g1_i1.path1	Pepsico2_Contig783.path1
TRINITY_DN8132_c0_g1_i1.path1	Pepsico1_Contig1320.path1	Pepsico1_Contig185.path1	Pepsico1_Contig6901.path2		novel.1453	Pepsico1_Contig2960.path1	TRINITY_DN15282_c0_g1_i1.path1	TRINITY_DN47113_c0_g3_i1.path1
TRINITY_DN3393_c0_g1_i2.path1	TRINITY_DN2833_c0_g2_i1.path1	Pepsico1_Contig5029.path1	TRINITY_DN7691_c1_g1_i3.path1		TRINITY_DN24782_c0_g1_i1.path2	Pepsico1_Contig2631.path1	novel.8125	TRINITY_DN10035_c0_g1_i1.path1
TRINITY_DN496_c0_g1_i1.path1	TRINITY_DN842_c0_g1_i1.path1	novel.9233	novel.4440		TRINITY_DN48093_c0_g1_i1.path1	TRINITY_DN9998_c0_g2_i1.path1	Pepsico1_Contig35948.path1	TRINITY_DN5562_c0_g1_i5.path1
[truncated: 7,119 more rows]

## Sheet: Sheet2
compare	all	up	down	threshold
BY2vsBY1	2733	1606	1127	DESeq2 padj<=0.05 |log2FoldChange|>=1.0
[truncated: 9 more rows]
