# Supplementary material for: Using transcriptome sequencing (RNA-Seq) to screen genes involved in β-glucan biosynthesis and accumulation during oat seed development
Source: PeerJ. 2024 Sep 25;12:e17804. doi: 10.7717/peerj.17804 (PMC11438436; doi:10.7717/peerj.17804)
Supplement: Supplemental Information 13 [file peerj-12-17804-s013.xlsx]

## Sheet: Sheet1
gene_id	BY1	BY2	BY3	BY4	BY5	DY1	DY2	DY3	DY4	DY5	gene_chr	gene_length	Family
TRINITY_DN15163_c0_g1_i1.path1	261.44	259.815	224.77	20.7889	215.038	15.6679	16.5817	11.004	3.46455	12.7022	2C	1617	AP2
TRINITY_DN22830_c0_g2_i1.path1	302.547	244.156	249.287	0	629.845	0	0	0	10.8615	0	7D	1376	ARF
Pepsico2_Contig2921.path1	127.087	206.746	182.89	180.376	122.259	23.1242	11.9008	13.9996	6.19598	13.2738	7D	2976	ARF
Pepsico2_Contig12140.path1	80.7189	101.046	66.1892	0	55.8845	0.254128	0	0.485154	8.30871	0.685576	1A	1075	ARF
TRINITY_DN6203_c1_g1_i4.path1	80.606	68.1867	68.6093	72.9483	142.401	20.6492	23.6646	22.8912	22.6945	37.806	5D	1729	ARR-B
TRINITY_DN60072_c0_g1_i1.path1	10.3651	13.6867	11.5858	12.7107	10.9136	0	0	0	0	0	2C	1062	ARR-B
TRINITY_DN5730_c0_g2_i2.path1	134.976	110.628	107.578	77.2404	69.0777	19.2796	24.9898	17.847	19.5804	21.9113	7C	2301	ARR-B
Pepsico2_Contig1223.path1	152.36	89.0638	67.6673	100.06	106.494	30.158	14.442	23.0043	40.8219	25.4035	6A	3182	ARR-B
TRINITY_DN7147_c0_g1_i3.path1	130.583	161.233	49.8649	32.8291	11.4737	7.40306	1.43586	1.83792	3.44558	0	7C	1634	B3
TRINITY_DN54033_c0_g2_i2.path2	34.4979	45.2338	28.2763	39.4031	44.2033	0	0	0	0	0.713918	7A	1232	B3
TRINITY_DN54033_c0_g2_i2.path1	20.3651	22.6428	18.7118	9.72462	10.0213	1.00238	0	0.416876	0	0	7D	1231	B3
TRINITY_DN4942_c0_g1_i2.path1	74.3497	86.8841	66.2091	84.4577	69.2785	1.07105	0.594407	0.485154	1.29454	2.70439	4A	2723	B3
TRINITY_DN19079_c0_g1_i1.path1	6.93996	13.9192	16.1851	21.2494	25.6819	0	0	0	0	0	4A	318	B3
TRINITY_DN11880_c0_g1_i1.path3	60.0272	51.7317	34.9872	51.0609	36.9736	1.88797	1.74885	0.755707	2.26348	2.44037	6D	2999	B3
TRINITY_DN1019_c0_g2_i1.path2	10.3267	39.6924	92.7	118.637	157.019	0.494124	0.28142	2.07461	7.16004	5.93119	6D	1441	B3
Pepsico2_Contig9200.path1	374.441	297.622	276.657	255.003	140.318	0	0	0	0	0	5A	2210	B3
Pepsico2_Contig2312.path1	30.9059	24.8885	29.525	44.4508	49.5611	2.41036	0.885991	1.95627	2.27619	1.65394	1A	1969	B3
Pepsico2_Contig20289.path1	88.6435	82.9877	83.1822	86.4939	116.447	0	0	0	0	0	3D	1704	B3
Pepsico2_Contig15428.path1	198.325	398.687	449.093	225.293	85.6696	6.94367	10.4513	10.2516	8.17299	8.94046	1D	1545	B3
Pepsico2_Contig14015.path1	60.7252	61.6158	38.1367	38.0121	47.7132	0	0	0	0	0	Chr00	2276	B3
TRINITY_DN6513_c0_g2_i1.path1	54.6548	57.7036	33.9205	49.7848	57.4829	0	0	0	0	0	3C	2368	bHLH
TRINITY_DN5893_c0_g1_i1.path1	252.759	186.558	142.62	145.959	192.309	73.3117	61.541	33.4288	47.5136	71.1523	7D	7585	bHLH
TRINITY_DN5246_c0_g1_i1.path1	323.751	377.673	221.635	260.855	226.629	16.2752	30.0005	27.2349	19.6244	21.6051	7D	2135	bHLH
TRINITY_DN33147_c0_g1_i1.path1	15.4875	20.1976	9.97853	15.7486	14.8202	0	0.588787	0	0.772421	0.685576	5D	456	bHLH
TRINITY_DN28246_c0_g1_i1.path2	7.41541	17.0129	6.78751	6.4755	10.0637	0.247062	0	0	0	0.342788	4A	1410	bHLH
TRINITY_DN2551_c0_g2_i2.path2	200.008	141.71	80.6647	60.2405	58.0571	14.0404	11.3064	10.0337	6.79143	3.00926	5A	1514	bHLH
TRINITY_DN24742_c0_g3_i1.path2	33.6183	43.9088	40.7499	63.9798	61.8823	1.39385	0.562841	1.64541	0.312879	2.34577	1A	1743	bHLH
TRINITY_DN16393_c0_g1_i1.path1	62.5473	49.7408	36.6498	51.712	45.5834	4.3458	0.873017	1.58946	3.50816	5.24562	5D	1021	bHLH
TRINITY_DN15919_c0_g1_i1.path1	54.3602	30.7727	25.4098	45.5814	33.589	4.06476	1.47478	1.80406	3.41527	5.16353	3D	414	bHLH
Pepsico2_Contig7708.path1	81.7103	72.4641	46.1543	51.9833	72.7203	0	0	0	0	0	7D	1467	bHLH
Pepsico2_Contig6644.path1	61.5825	104.866	193.154	173.834	127.445	9.85458	5.78516	9.42429	25.6493	17.3931	5D	1159	bHLH
Pepsico2_Contig15659.path2	26.4258	26.5933	26.2436	129.64	194.657	0.322798	0	0	0.38621	0	4A	2988	bHLH
Pepsico2_Contig10529.path2	51.6466	176.412	120.334	141.785	77.3058	2.88329	1.15725	3.77598	2.45317	1.3049	4A	2294	bHLH
Pepsico1_Contig34145.path1	177.348	185.968	141.263	58.8397	27.5084	0	0	0	0	0	5A	3831	bHLH
Pepsico1_Contig32548.path2	145.748	130.195	116.721	134.339	155.106	6.48855	3.17908	3.5737	11.1023	7.19192	1A	3210	bHLH
Pepsico1_Contig27806.path1	958.965	697.767	315.702	259.179	141.74	23.4328	129.41	116.638	80.6778	32.3066	4A	2314	bHLH
Pepsico1_Contig17817.path1	114.032	46.5588	53.2867	61.8606	46.1479	3.52888	3.55239	0.485154	1.12832	2.11341	4A	2017	bHLH
TRINITY_DN42370_c0_g1_i1.path1	76.7539	33.6314	30.8519	44.8438	36.0761	11.2612	6.6424	2.83032	1.69346	5.14476	2A	274	bZIP
TRINITY_DN37315_c0_g1_i3.path1	7.05335	6.16187	7.76496	9.53809	11.8385	0	0	0	0	0	2C	883	bZIP
TRINITY_DN323_c0_g1_i2.path1	235.151	225.697	163.153	159.349	128.709	5.23204	3.20049	4.50627	9.50761	1.40575	6D	1327	bZIP
TRINITY_DN24406_c0_g1_i1.path1	44.6054	40.2374	23.7109	46.893	35.0457	8.09618	2.31904	1.89387	3.19528	5.31418	7A	404	bZIP
TRINITY_DN23498_c0_g1_i1.path1	55.2664	43.2491	35.3186	32.985	30.6294	9.92319	12.9571	8.81491	4.50057	5.17936	6D	1340	bZIP
TRINITY_DN23463_c1_g1_i1.path1	26.5645	15.3444	10.6722	24.0194	23.7114	0	0	0	0	0	2C	627	bZIP
TRINITY_DN16511_c0_g1_i6.path1	31.6832	36.1682	33.3102	32.0256	13.2779	0	0.591597	0	0	0	7D	2215	bZIP
TRINITY_DN1380_c0_g1_i2.path2	72.0159	87.5537	60.8184	74.5828	69.9976	7.96456	10.6025	7.22801	12.8075	8.45264	4A	3194	bZIP
TRINITY_DN10812_c0_g1_i2.path1	88.9369	54.8819	28.7423	34.515	67.1808	1.38678	1.4618	0.270553	2.76605	0	7A	1276	bZIP
Pepsico2_Contig426.path1	216.729	173.852	153.271	219.878	347.558	19.392	27.8717	23.7035	31.2283	17.5365	Chr00	1805	bZIP
Pepsico2_Contig12326.path2	180.27	158.446	88.6486	170.402	146.483	23.5079	31.7235	17.9147	22.4305	30.0696	5D	2192	bZIP
Pepsico1_Contig38.path2	2620.13	519.618	772.692	1281.21	1355.96	217.332	109.471	64.7643	71.5701	130.306	7A	887	bZIP
Pepsico1_Contig36346.path1	50.3749	45.4476	23.7465	21.9504	18.6047	1.40092	2.01448	2.26712	2.33681	1.32698	6A	4418	bZIP
TRINITY_DN7319_c0_g3_i1.path2	32.9969	26.2747	23.5401	32.087	36.941	0.247062	0.591597	0	0	1.35532	7D	3353	C2H2
TRINITY_DN37195_c0_g1_i7.path1	80.3219	111.118	102.501	67.3524	91.3194	0.508257	0	0	0	0	7C	5262	C2H2
Pepsico2_Contig9614.path3	88.9782	144.329	116.268	159.171	190.635	19.2271	22.6167	26.872	24.6617	29.3122	7C	2170	C2H2
Pepsico2_Contig8195.path2	31.3485	58.7051	42.6394	60.683	82.4835	0	0	0	0.3559	0.984194	7D	3189	C2H2
Pepsico2_Contig8093.path2	112.903	118.455	121.829	127.252	143.205	21.5597	27.3884	24.4936	39.3338	37.108	5C	2134	C2H2
Pepsico2_Contig1978.path1	10.1235	8.2557	6.83637	9.62191	12.5062	0	0	0	0	0	7C	2311	C2H2
TRINITY_DN8978_c0_g1_i11.path1	45.343	45.4331	40.3754	48.6123	42.1943	3.95568	3.1633	3.96849	3.94521	3.38997	6A	2989	C3H
TRINITY_DN14583_c0_g1_i3.path1	51.5576	49.7774	37.4033	68.3845	79.4157	0	0	0	0	0	2D	2381	C3H
Pepsico2_Contig4524.path1	116.796	148.178	140.017	128.845	96.2908	0.748252	1.15444	2.44142	0.3559	0.685576	1A	2061	C3H
Pepsico2_Contig20590.path1	238.185	114.348	48.3087	58.7362	48.5995	0	0	0	0	0	4D	828	C3H
Pepsico2_Contig16486.path1	103.219	105.913	90.4458	96.9429	80.0432	0.254128	0	0	0	0	5D	3470	C3H
Pepsico1_Contig37885.path1	46.5494	53.1214	65.0357	56.1374	86.8526	10.0733	13.6311	11.3526	16.3362	13.4501	2D	5209	C3H
TRINITY_DN11834_c0_g1_i4.path1	434.273	359.314	280.652	394.856	424.989	130.435	131.694	103.233	124.913	166.428	7C	2184	CAMTA
TRINITY_DN31113_c0_g3_i2.path1	746.385	237.622	94.2775	115.433	82.5977	10.7997	1.44602	0.930006	1.56439	1.45618	6C	453	CO-like
TRINITY_DN3299_c0_g1_i18.path1	75.1291	55.6175	68.0631	89.2175	63.8874	3.31715	2.93766	2.5813	5.49689	0.641405	7C	1547	CPP
Pepsico1_Contig6170.path1	77.0364	565.21	657.699	891.778	829.931	2.66449	124.072	206.538	270.882	258.383	3C	1347	DBB
TRINITY_DN1843_c0_g1_i4.path1	15951.2	24983.5	28525.9	19166.3	7751.85	349.766	589.926	1099.2	1153.42	1074.01	1D	658	Dof
Pepsico2_Contig8726.path1	3658.54	3967.04	6220.27	3370.71	1747.52	56.5439	195.014	388.534	356.418	277.796	Chr00	1701	Dof
Pepsico2_Contig19535.path1	3471.19	3256.65	5445.56	3246.16	1511.58	47.6699	49.4623	168.616	214.957	128.219	Chr00	1241	Dof
Pepsico2_Contig14530.path1	23633	32720.5	79177.4	56238.1	25190.4	15.1015	28.2671	148.731	241.189	165.708	1D	1653	Dof
Pepsico2_Contig11265.path1	692.149	910.653	1388.14	927.176	403.825	12.5962	48.3334	100.785	165.344	98.5812	3D	1673	Dof
Pepsico1_Contig6988.path1	39.4758	46.1198	54.5504	55.8736	51.8317	0.247062	0	0	0	0	5A	1495	Dof
Pepsico1_Contig4680.path1	257.2	121.994	93.1713	138.369	109.357	28.5487	14.1606	17.5621	18.9986	20.0889	7A	1365	Dof
Pepsico1_Contig3957.path1	287.531	170.015	86.5284	178.237	169.939	18.6784	25.1381	22.3026	30.8284	32.2993	3D	1408	Dof
Pepsico1_Contig24342.path2	145.665	163.713	267.896	216.651	91.1943	6.03688	8.15155	16.8903	15.684	12.0914	7A	1711	Dof
TRINITY_DN6144_c0_g2_i2.path2	238.857	226.967	236.758	407.57	698.125	1.91624	0.860044	1.53939	3.31163	5.67906	3D	3243	E2F/DP
TRINITY_DN43549_c0_g1_i1.path2	9.22406	31.956	57.7515	38.7276	37.563	0	0	0	0	0	5D	765	E2F/DP
TRINITY_DN22076_c0_g2_i1.path1	27.3202	20.8041	31.6271	53.5016	75.4156	4.17583	3.19206	8.2022	5.74133	6.59468	6C	1934	E2F/DP
Pepsico2_Contig337.path1	18.5417	32.3207	37.8724	126.259	287.689	0	0	0	0	0	5D	1729	E2F/DP
TRINITY_DN9829_c0_g1_i3.path1	37.7953	48.5297	37.2646	52.7563	49.7341	0	0	0	0	0	5D	1229	ERF
TRINITY_DN27835_c0_g1_i1.path2	29.6823	57.0764	23.3025	23.304	23.153	0.755318	4.00756	1.59534	3.06133	1.99047	5D	2212	ERF
TRINITY_DN22392_c1_g1_i3.path1	18.8722	12.8222	15.9128	16.5166	8.16312	0	0	0	0	0	7C	2792	ERF
Pepsico2_Contig643.path2	38.5906	18.3615	20.4409	17.1196	31.5177	1.88091	0.28142	0.242577	0.7118	0	4D	1555	ERF
Pepsico2_Contig5160.path1	160.025	150.445	139.035	130.907	165.091	7.38828	4.93247	5.42395	5.27495	2.33952	5A	988	ERF
Pepsico2_Contig17149.path2	48.2417	160.285	204.547	188.856	446.727	1.83344	1.71728	9.23767	12.1964	12.9089	Chr00	885	ERF
Pepsico2_Contig16302.path2	223.953	165.339	92.6053	99.2695	97.4924	4.82008	3.21065	3.67584	2.93226	1.79897	1A	3115	ERF
Pepsico2_Contig14570.path1	117.979	173.918	227.149	241.931	204.729	0.645597	0	0.783683	3.515	0.685576	5A	1400	ERF
Pepsico1_Contig3978.path1	80.1816	179.468	216.183	292.656	464.381	15.0301	12.8612	26.5618	55.3992	71.4117	2D	1345	ERF
TRINITY_DN39189_c1_g1_i3.path1	7.29233	9.32777	24.6984	27.5368	10.7559	0	0	0	0	0	4A	600	FAR1
TRINITY_DN31456_c0_g2_i4.path2	57.6137	66.0017	76.7643	121.52	146.617	0.968395	1.15163	0.811659	3.07404	4.77989	7C	3596	FAR1
TRINITY_DN23178_c0_g1_i1.path1	20.8148	13.591	15.1718	11.734	14.1741	0	0.891611	0	0	0	2D	677	FAR1
TRINITY_DN16231_c0_g1_i2.path2	23.9019	24.6869	25.2453	29.1239	30.9111	0.645597	0.294393	0.416876	1.32485	0.37113	5D	2491	FAR1
Pepsico2_Contig8385.path1	55.891	55.7483	49.4273	64.5764	86.2318	2.1421	0.88318	0	2.22633	3.06926	7C	2851	FAR1
TRINITY_DN9600_c0_g1_i1.path1	68.7463	64.8482	60.7857	33.1903	25.6966	3.28754	0	0.416876	0.312879	0	7D	2607	G2-like
TRINITY_DN4708_c1_g1_i2.path1	482.559	607.04	592.146	664.626	821.795	0	0	0	0	0	2D	2916	G2-like
Pepsico2_Contig9973.path1	16.4852	33.3873	35.3336	68.1727	172.09	0	1.45445	0.485154	0.312879	1.42784	4A	1903	G2-like
Pepsico2_Contig2735.path1	74.1377	49.785	23.0598	27.5349	28.4449	11.3235	3.53099	3.28106	5.66116	7.19192	4C	2863	G2-like
Pepsico1_Contig33288.path1	229.397	120.318	92.5811	167.746	176.616	14.0848	14.909	14.9263	41.9023	30.1299	1A	3447	G2-like
TRINITY_DN30719_c0_g1_i1.path2	34.4082	37.9954	23.0985	69.8147	44.3427	0.254128	0.888801	4.88028	5.70418	2.01881	Chr00	288	GeBP
TRINITY_DN24482_c0_g1_i3.path1	72.9056	63.1175	40.0869	48.4536	39.4336	12.8206	22.8592	11.1901	6.92343	3.97137	6D	3122	GeBP
Pepsico1_Contig5775.path1	60.071	84.4001	75.4453	95.9209	110.341	2.9533	6.05642	1.45546	3.17181	5.35273	5C	1217	GeBP
TRINITY_DN6115_c1_g1_i2.path2	14.8869	23.1003	11.7714	25.6034	22.7967	0.247062	0	0	0	0	7C	1131	GRAS
TRINITY_DN5322_c0_g2_i1.path1	115.353	112.861	107.952	105.809	71.5819	21.452	23.7582	17.0692	24.3792	27.2406	6A	2344	GRAS
TRINITY_DN47463_c0_g1_i4.path2	9.19456	11.2972	7.61031	7.74527	7.21547	0	0	0	0	0	3A	1545	GRAS
TRINITY_DN23242_c0_g2_i5.path1	93.4916	98.2946	68.891	53.2013	68.5751	8.40549	2.31904	0.51313	2.10998	2.42786	4C	2468	GRAS
TRINITY_DN16277_c0_g1_i4.path1	5.90434	27.3602	18.3287	27.6242	18.2714	0	0	0	0	0	4D	1159	GRAS
TRINITY_DN15712_c0_g1_i2.path1	387.016	352.628	237.093	285.331	275.051	80.9832	101.403	80.9351	77.0181	114.851	5D	1738	GRAS
TRINITY_DN12387_c0_g1_i1.path1	18.0131	22.0361	32.7543	12.1157	18.8001	0.322798	0	0	0.7118	0.320703	Chr00	924	GRAS
TRINITY_DN1229_c0_g2_i1.path2	26.5969	43.6165	22.6164	17.1298	15.0772	0	0.575814	0.811659	1.29454	0.691833	6A	2450	GRAS
Pepsico2_Contig2978.path2	163.348	199.741	110.946	154.766	203.723	9.59705	25.6757	23.2345	22.2183	22.5095	5D	1716	GRAS
Pepsico2_Contig2978.path1	140.952	129.612	105.41	254.521	227.987	19.0992	17.0567	32.9354	33.5015	59.7856	5A	1712	GRAS
Pepsico2_Contig20617.path1	80.496	109.069	47.9012	94.7557	51.4462	14.2612	11.0029	12.0302	15.1023	12.1452	4A	1739	GRAS
Pepsico2_Contig16986.path2	455.163	345.286	245.793	434.831	452.954	131.13	133.995	53.3317	66.4741	134.306	Chr00	1927	GRAS
TRINITY_DN32653_c0_g1_i1.path1	7.08496	16.5528	9.81334	9.42294	11.484	0	0	0	0	0	5C	1398	HB-other
TRINITY_DN1122_c0_g4_i2.path2	56.568	69.2571	47.1602	27.8503	17.9125	0.762385	0.28142	0	0	0	2A	2370	HB-other
Pepsico2_Contig11849.path2	11.7556	11.4066	7.63562	9.33082	11.334	0	0	0	0	0	4A	3137	HB-other
TRINITY_DN3394_c1_g2_i1.path1	91.5953	91.2659	66.3781	133.934	94.8477	27.2192	19.2425	5.46169	14.0854	18.8753	6D	1456	HD-ZIP
TRINITY_DN13943_c0_g1_i8.path1	12.7478	7.70705	7.24631	9.25561	11.9365	0.995314	0	0	0	0.713918	4A	1662	HD-ZIP
TRINITY_DN17793_c0_g3_i2.path1	28.8465	96.3383	148.82	380.619	484.527	1.53826	0	3.49954	40.5794	226.278	2A	924	HSF
TRINITY_DN36403_c0_g4_i2.path1	56.2438	41.0923	25.333	23.2087	10.1739	0	0	0	0.3559	0	3C	1242	LBD
TRINITY_DN34497_c1_g1_i1.path3	182.713	202.036	119.603	125.974	107.479	20.9212	10.9161	2.42577	1.48422	2.78942	6D	769	LBD
TRINITY_DN34044_c0_g1_i1.path1	24.9721	14.4248	15.7911	22.9713	14.5059	2.0593	0.562841	1.49909	1.33756	0.37113	5D	485	LBD
TRINITY_DN27841_c0_g1_i1.path1	19.5099	34.6211	56.6271	39.1157	36.9976	0	0	0	0	0	6C	1531	LBD
TRINITY_DN15123_c0_g1_i4.path1	113.376	54.3836	35.6279	47.1403	69.1538	10.0541	8.86219	5.19114	5.27495	5.28021	3C	1163	LBD
TRINITY_DN1240_c0_g2_i1.path2	64.1419	75.6289	54.5658	64.1989	76.046	16.232	10.7818	9.17195	10.5333	11.8835	1D	3314	LBD
TRINITY_DN106656_c0_g1_i1.path1	14.6289	15.9125	17.5751	27.5239	9.3715	0	0	0	0	0	4C	835	LBD
Pepsico1_Contig31806.path1	393.441	244.949	164.908	166.235	140.797	71.6236	86.4846	67.4333	56.9244	53.4281	4A	3695	LBD
TRINITY_DN43845_c0_g1_i13.path1	14.3242	18.8729	24.1771	27.4374	49.4413	0	0	0	1.85772	0	6C	1503	MIKC_MADS
Pepsico2_Contig19460.path2	57.5479	79.3945	69.3734	114.36	128.896	12.1326	8.42843	12.9818	9.72174	11.9593	5A	2063	MIKC_MADS
Pepsico2_Contig12952.path2	46.9266	78.9931	68.8767	32.94	27.2181	1.07105	0.591597	0	0	0.691833	1A	1036	MIKC_MADS
Pepsico1_Contig8217.path2	337.045	349.385	280.346	260.391	215.023	62.6638	51.613	71.2606	68.6994	52.62	1C	1494	MIKC_MADS
TRINITY_DN31317_c1_g1_i2.path1	26.4591	82.1733	49.4074	34.1815	9.3763	0	0	0	0	0	4D	2799	M-type_MADS
TRINITY_DN27607_c0_g1_i10.path1	51.4446	22.5042	29.1563	46.4292	86.4314	4.94458	1.12568	1.49909	3.24514	1.00628	2D	3188	M-type_MADS
TRINITY_DN21432_c0_g2_i1.path1	31.0408	17.9544	15.3988	12.8503	18.9437	0.322798	0	0	0	0	4C	831	M-type_MADS
Pepsico2_Contig7319.path1	95.5447	83.753	65.7619	81.9969	93.7413	0.508257	0	0.416876	0	0	4A	1023	M-type_MADS
Pepsico2_Contig5514.path1	81.8359	75.0085	69.6714	54.0607	27.8577	15.7379	11.3734	4.85487	7.62545	5.42755	4D	3749	M-type_MADS
Pepsico2_Contig4522.path1	53.5859	39.525	27.4822	31.6334	21.2653	4.53833	6.41006	4.03088	1.09801	3.79569	4D	1801	M-type_MADS
Pepsico2_Contig19444.path1	648.412	880.727	769.235	571.309	442.591	114.388	123.39	170.264	222.066	179.577	4A	1608	M-type_MADS
Pepsico2_Contig16720.path1	536.688	390.709	227.704	137.256	64.6899	0	0	0	0	0	4A	4659	M-type_MADS
Pepsico1_Contig7140.path1	35.3734	40.2431	50.6856	78.0363	51.5819	0	0	0	0	0	2C	1157	M-type_MADS
TRINITY_DN70835_c0_g1_i1.path1	7.07062	15.5293	18.8068	14.6572	7.88317	0	0	0	0	0	6C	437	MYB
TRINITY_DN1004_c0_g1_i1.path1	445.642	366.786	227.054	270.601	420.013	14.0007	13.0721	4.15511	8.12704	7.3432	7C	1774	MYB
Pepsico2_Contig20820.path2	74.7037	73.2408	40.8017	75.5379	52.5119	15.8073	16.307	14.3911	11.8826	10.8624	Chr00	3059	MYB
Pepsico2_Contig12767.path1	319.018	170.958	120.547	68.4584	61.5943	0	0	0	0	0	7C	1191	MYB
TRINITY_DN88746_c0_g1_i1.path1	38.1751	40.0135	22.3562	35.9505	18.3386	0	0	0	0	0	7D	928	MYB_related
TRINITY_DN6565_c0_g1_i3.path1	67.2555	47.4046	42.4372	47.8138	83.5522	0	0	0	0	0	3D	2165	MYB_related
TRINITY_DN34912_c0_g1_i2.path1	223.356	128.223	96.7166	55.0267	53.4054	2.73316	1.4618	0.727731	2.93226	1.79897	5A	1427	MYB_related
TRINITY_DN26343_c0_g2_i1.path2	11.6565	36.6599	32.7113	64.0554	113.049	0.645597	2.62467	1.76964	0.625757	1.37115	7C	3358	MYB_related
TRINITY_DN24412_c0_g1_i5.path1	28.1506	19.5557	27.5031	28.8309	25.8591	0	0	0	0	0	4A	4146	MYB_related
TRINITY_DN18897_c2_g1_i1.path1	11.5916	30.6702	33.9784	37.1133	37.5509	0	0	0	0	0.37113	7D	208	MYB_related
TRINITY_DN18193_c0_g2_i1.path2	27.0994	33.132	20.016	25.4459	22.3632	0	0	2.39524	0	0	5A	1057	MYB_related
TRINITY_DN16546_c0_g1_i4.path1	140.972	157.484	71.9947	174.149	166.318	6.33136	5.19076	1.80994	1.0677	1.37115	5C	2448	MYB_related
TRINITY_DN12677_c0_g1_i1.path1	210.876	207.377	128.958	152.978	122.977	88.2058	69.7724	55.7241	45.8006	50.2511	1D	2555	MYB_related
Pepsico2_Contig2180.path1	603.841	512.827	365.218	516.159	437.38	110.812	104.287	98.6249	119.694	114.594	7D	1397	MYB_related
Pepsico2_Contig12871.path3	228.499	173.276	125.201	159.695	150.771	18.2516	23.0814	12.8301	14.0737	16.1301	7C	2097	MYB_related
Pepsico2_Contig12299.path1	47.7452	169.123	159.8	101.172	33.8862	1.38678	0.594407	1.07633	1.90074	1.35532	4D	1481	MYB_related
Pepsico2_Contig11468.path1	474.024	352.262	202.867	260.972	190.418	0	0	0	0	0	5D	1171	MYB_related
TRINITY_DN5457_c0_g1_i2.path1	256.543	457.43	414.865	420.571	223.282	0	0	0.242577	0	0	3C	924	NAC
TRINITY_DN5030_c0_g1_i7.path1	14.7322	12.0677	12.009	12.6481	11.1544	0.254128	0.297204	0	0.38621	0.342788	6C	1486	NAC
TRINITY_DN38303_c0_g1_i2.path1	121.065	104.437	138.681	182.439	179.785	8.92454	6.41676	4.47573	7.24315	2.46246	5C	644	NAC
TRINITY_DN32584_c0_g1_i1.path1	12.8928	44.9678	61.1077	118.822	132.241	1.15385	0.578624	11.1777	19.2	28.5953	5A	1172	NAC
TRINITY_DN29983_c0_g1_i2.path1	176.07	189.429	113.966	127.365	108.365	22.9104	7.31919	2.26712	0.981658	3.32371	6D	520	NAC
TRINITY_DN29879_c0_g1_i4.path1	39.0336	18.7427	25.1474	76.1387	97.5357	0.823988	0.588787	0	0.668779	0.641405	Chr00	3043	NAC
TRINITY_DN20124_c1_g1_i1.path3	36.358	22.5547	15.4806	22.5051	10.1453	0.494124	0	0	0	0.342788	2D	942	NAC
Pepsico2_Contig9071.path1	38.9923	28.1515	14.8537	36.0938	52.811	0	0	0	0	0	7C	1937	NAC
Pepsico2_Contig15299.path2	73.5611	67.3438	48.8578	37.677	38.4057	0.247062	0.88318	0.416876	0.3559	0.663491	4A	1367	NAC
Pepsico1_Contig886.path1	221.791	261.132	269.867	522.065	1158.36	43.6041	101.456	112.091	260.3	287.153	1A	713	NAC
Pepsico1_Contig3556.path1	45.2023	57.973	34.7597	64.0468	38.0833	0	1.15163	0	0.625757	0	7C	1170	NAC
Pepsico1_Contig3093.path1	22.5143	60.1875	90.6081	95.6982	95.1651	4.21553	2.35342	12.7814	20.1328	28.0541	7C	1144	NAC
Pepsico1_Contig2227.path2	20.3132	11.3122	7.49152	14.1948	13.5987	0	0	0	0	0	1A	711	NAC
Pepsico1_Contig1188.path2	583.882	772.694	708.93	673.171	308.198	23.4144	51.3248	39.8616	97.3191	66.6029	1D	922	NAC
TRINITY_DN106693_c0_g1_i1.path1	18.7685	12.9357	14.3564	35.1949	51.7575	2.8089	1.48321	0.930006	4.42235	2.43411	6C	1647	NF-YA
Pepsico2_Contig12126.path2	245.305	231.9	176.045	171.428	147.355	81.5819	86.1009	61.8219	67.138	69.876	3D	1932	NF-YA
TRINITY_DN46859_c0_g1_i1.path1	31.2414	19.4777	23.0214	22.9344	18.3373	2.38916	1.71728	1.66751	2.79636	2.46246	5A	340	NF-YB
Pepsico2_Contig20783.path1	7301.11	7523.67	4766.74	8495.78	6865.11	295.56	436.523	747.308	1231.81	352.951	3D	790	NF-YB
TRINITY_DN497_c0_g1_i2.path1	1222.87	846.685	922.197	916.046	696.635	18.0597	14.7821	10.0272	12.3969	15.3941	5D	1018	NF-YC
Pepsico2_Contig3599.path1	199.903	174.113	131.995	78.2491	114.569	1.32518	2.02465	9.41841	6.89996	7.27069	1D	1602	NF-YC
Pepsico2_Contig16832.path1	40.6986	29.7303	35.3989	50.8256	94.7402	7.11295	3.48191	2.83032	3.43483	2.74856	2D	2259	Nin-like
TRINITY_DN37171_c0_g1_i1.path1	44.597	38.8535	29.6646	53.3878	48.7442	4.93686	5.77219	2.99229	1.76679	3.80527	6A	1504	RAV
TRINITY_DN12320_c0_g1_i2.path1	179.044	228.899	125.934	106.549	162.687	0	0	0	0	0	2D	1035	SBP
Pepsico2_Contig13314.path1	1645.83	697.166	466.244	649.452	693.926	212.484	142.133	94.451	104.76	120.413	Chr00	1087	TALE
TRINITY_DN46245_c0_g1_i1.path2	13.1651	18.4881	7.64886	19.1291	13.0473	0	0	0	0	0	2A	744	TCP
TRINITY_DN24376_c0_g3_i1.path1	194.711	226.318	151.884	182.39	151.333	0	0	0	0	0	7D	4758	TCP
TRINITY_DN20313_c0_g1_i6.path3	134.521	173.015	174.058	217.886	147.344	0	0	0	0	0	2D	5710	TCP
TRINITY_DN19042_c0_g1_i1.path1	14.9876	23.6279	15.2074	16.3905	13.0681	0	0	0	0	0	2D	1835	TCP
Pepsico2_Contig2570.path3	136.808	94.4864	62.2991	82.8566	97.1305	58.3194	26.8273	14.6609	16.7869	20.0919	7C	685	TCP
Pepsico1_Contig37537.path1	251.762	388.505	313.864	329.604	358.055	0	0	0	0	0	6C	5236	TCP
Pepsico1_Contig37533.path4	123.038	100.667	106.701	101.672	98.2288	59.4241	37.5836	23.5225	13.7559	34.8343	2D	5235	TCP
Pepsico1_Contig37533.path3	139.713	146.77	121.587	137.643	120.573	5.99443	4.64932	2.76204	3.21483	3.12595	2A	5241	TCP
TRINITY_DN27142_c0_g2_i1.path1	119.324	81.964	59.9507	58.5211	103.963	12.3386	9.62071	6.30777	4.70492	7.2384	2D	4724	Trihelix
TRINITY_DN13905_c0_g1_i1.path2	44.4402	25.3336	25.9581	18.9371	32.1678	3.18623	4.89636	0.783683	1.69346	0.320703	5C	2736	Trihelix
Pepsico2_Contig13875.path1	107.259	73.7142	57.3037	91.8735	101.656	33.5422	15.4087	13.6418	11.4152	12.3554	5D	1760	Trihelix
Pepsico1_Contig36060.path1	27.5959	33.4868	24.8098	31.9499	33.7138	2.54064	1.15725	0.755707	1.38058	1.3049	7C	4376	Trihelix
TRINITY_DN25430_c0_g1_i2.path2	139.423	103.677	61.8449	51.9076	59.3676	22.6775	18.832	12.4998	12.4633	16.0569	4A	1733	Whirly
TRINITY_DN21549_c0_g1_i1.path1	299.15	148.877	114.146	191.136	171.842	0	0	0	0	0	6D	2069	WOX
TRINITY_DN92719_c0_g1_i1.path1	17.1145	20.6974	17.6453	11.6224	8.5231	0	0	0	0	0	2D	1067	WRKY
TRINITY_DN8605_c0_g1_i8.path1	205.519	293.544	223.953	165.642	172.475	38.8229	47.2373	30.8008	32.8699	34.6801	2D	6215	WRKY
TRINITY_DN27051_c1_g1_i1.path1	12.8881	20.4314	16.3036	19.2948	8.74117	0.645597	1.42008	0	1.02468	0	6C	217	WRKY
TRINITY_DN25978_c0_g3_i1.path2	18.8039	14.3113	14.9315	17.1129	20.4432	0	0	0	0	0	7C	1012	WRKY
TRINITY_DN23034_c0_g1_i1.path1	31.5044	43.6548	40.0862	47.6772	55.3081	3.35756	7.52558	1.38718	2.82178	5.33001	1A	323	WRKY
TRINITY_DN21900_c0_g1_i2.path1	14.0485	18.7485	13.1902	16.785	19.9174	0	0	0	0	0	4A	365	WRKY
TRINITY_DN19684_c1_g1_i1.path1	29.1993	50.3305	44.6658	44.5554	25.8578	0	0	0	0	0	5D	1455	WRKY
TRINITY_DN16062_c0_g1_i1.path1	25.0222	19.3177	22.3867	14.0362	21.6008	0	0	0	0.38621	0	5A	461	WRKY
TRINITY_DN14351_c0_g1_i2.path1	19.9917	22.8696	14.7558	19.884	18.7009	0	0	0	0	0	6C	787	WRKY
TRINITY_DN14093_c0_g1_i3.path1	12.9244	19.4463	12.0834	20.9328	16.3573	0.254128	1.44883	0	0	0	6C	970	WRKY
TRINITY_DN12383_c0_g1_i2.path1	168.342	100.887	75.8825	117.804	97.2521	12.7981	7.5126	8.02146	13.4039	17.6644	5D	3355	WRKY
TRINITY_DN12145_c0_g1_i1.path1	145.567	112.725	121.509	128.466	123.578	0.322798	0	0.242577	0	0	5D	4637	WRKY
TRINITY_DN11773_c0_g2_i1.path3	38.4301	15.6746	21.041	17.3617	16.1784	4.53698	1.18319	0	0	0.37113	6D	734	WRKY
TRINITY_DN113106_c0_g1_i1.path1	8.5425	6.95292	8.66531	9.38134	12.1791	0	0	0	0	0	5D	319	WRKY
Pepsico2_Contig5745.path1	23.8277	48.8124	60.562	37.2829	12.6386	0	0	0	0	0	4C	3434	WRKY
Pepsico1_Contig33914.path1	143.8	107.41	78.2429	102.087	69.8902	0	0	0	0	0	5D	4008	WRKY
TRINITY_DN10594_c0_g1_i4.path1	399.142	316.027	239.911	275.267	294.809	36.1067	27.4481	21.9397	28.4241	20.7145	Chr00	1292	ZF-HD
Pepsico2_Contig8853.path1	201.635	273.803	210.258	199.688	179.095	53.3649	57.7607	56.8592	45.034	59.4019	5A	1561	ZF-HD
