# Supplementary material for: Using transcriptome sequencing (RNA-Seq) to screen genes involved in β-glucan biosynthesis and accumulation during oat seed development
Source: PeerJ. 2024 Sep 25;12:e17804. doi: 10.7717/peerj.17804 (PMC11438436; doi:10.7717/peerj.17804)
Supplement: Supplemental Information 14 [file peerj-12-17804-s014.xlsx]

## Sheet: Cq
reference gene				TRINITY_DN34252				TRINITY_DN15420				Pepsico2_Contig6346				TRINITY_DN34723				Pepsico1_Contig10341
reference gene	S_Name	Cq		Gene	S_Name	Cq		Gene	S_Name	Cq		Gene	S_Name	Cq		Gene	S_Name	Cq		Gene	S_Name	Cq
BY1N	BY1	20.42		HZQ1	BY1	26.87		HZQ2	BY1	25.38		HZQ3	BY1	31.45		HZQ4	BY1	20.33		HZQ5	BY1	30.46
BY1N	BY1	20.4		HZQ1	BY1	26.95		HZQ2	BY1	25.42		HZQ3	BY1	31.29		HZQ4	BY1	20.37		HZQ5	BY1	29.7
BY1N	BY1	20.4		HZQ1	BY1	26.84		HZQ2	BY1	25.37		HZQ3	BY1	31.18		HZQ4	BY1	20.48		HZQ5	BY1	29.69
BY2N	BY2	21.05		2HZQ1	BY2	29.53		2HZQ2	BY2	26.42		2HZQ3	BY2	26.4		2HZQ4	BY2	25.18		2HZQ5	BY2	30.46
BY2N	BY2	21.02		2HZQ1	BY2	29.55		2HZQ2	BY2	26.79		2HZQ3	BY2	26.39		2HZQ4	BY2	25.25		2HZQ5	BY2	29.7
BY2N	BY2	21		2HZQ1	BY2	30.34		2HZQ2	BY2	26.77		2HZQ3	BY2	26.5		2HZQ4	BY2	25.23		2HZQ5	BY2	29.69
BY3N	BY3	21.73		3HZQ1	BY3	31.35		3HZQ2	BY3	31.23		3HZQ3	BY3	26.32		3HZQ4	BY3	25.35		3HZQ5	BY3	27.19
BY3N	BY3	21.76		3HZQ1	BY3	31.49		3HZQ2	BY3	31.13		3HZQ3	BY3	26.19		3HZQ4	BY3	25.19		3HZQ5	BY3	26.95
BY3N	BY3	21.76		3HZQ1	BY3	31.24		3HZQ2	BY3	30.54		3HZQ3	BY3	26.24		3HZQ4	BY3	25.16		3HZQ5	BY3	26.75
BY4N	BY4	20.2		4HZQ1	BY4	32.94		4HZQ2	BY4	30.27		4HZQ3	BY4	24.96		4HZQ4	BY4	27.5		4HZQ5	BY4	25.17
BY4N	BY4	20.26		4HZQ1	BY4	32.95		4HZQ2	BY4	29.5		4HZQ3	BY4	25.03		4HZQ4	BY4	27.37		4HZQ5	BY4	25.23
BY4N	BY4	20.23		4HZQ1	BY4	32.97		4HZQ2	BY4	30.28		4HZQ3	BY4	25.05		4HZQ4	BY4	27.4		4HZQ5	BY4	25.26
BY5N	BY5	21.08		5HZQ1	BY5	31.49		5HZQ2	BY5	27.41		5HZQ3	BY5	25.7		5HZQ4	BY5	30.3		5HZQ5	BY5	25.73
BY5N	BY5	21.07		5HZQ1	BY5	31.45		5HZQ2	BY5	28.02		5HZQ3	BY5	25.62		5HZQ4	BY5	30.32		5HZQ5	BY5	25.66
BY5N	BY5	21.08		5HZQ1	BY5	31.57		5HZQ2	BY5	27.79		5HZQ3	BY5	25.66		5HZQ4	BY5	30.21		5HZQ5	BY5	25.54
DY1N	DY1	19.24		HZQ1	DY1	23.1		HZQ2	DY1	22.07		HZQ3	DY1	29.21		HZQ4	DY1	19.68		HZQ5	DY1	25.07
DY1N	DY1	19.23		HZQ1	DY1	23.25		HZQ2	DY1	21.69		HZQ3	DY1	29.31		HZQ4	DY1	19.86		HZQ5	DY1	25.28
DY1N	DY1	19.23		HZQ1	DY1	23.12		HZQ2	DY1	21.92		HZQ3	DY1	29.17		HZQ4	DY1	19.31		HZQ5	DY1	25.73
DY2N	DY2	20.92		2HZQ1	DY2	27.82		2HZQ2	DY2	25.6		2HZQ3	DY2	28.38		2HZQ4	DY2	19.68		2HZQ5	DY2	31.3
DY2N	DY2	20.93		2HZQ1	DY2	27.96		2HZQ2	DY2	25.58		2HZQ3	DY2	27.92		2HZQ4	DY2	19.86		2HZQ5	DY2	30.21
DY2N	DY2	20.97		2HZQ1	DY2	27.84		2HZQ2	DY2	25.7		2HZQ3	DY2	28.37		2HZQ4	DY2	19.31		2HZQ5	DY2	30.23
DY3N	DY3	21.69		3HZQ1	DY3	31.75		3HZQ2	DY3	28.13		3HZQ3	DY3	27.81		3HZQ4	DY3	27.11		3HZQ5	DY3	29.21
DY3N	DY3	21.7		3HZQ1	DY3	32.85		3HZQ2	DY3	28.21		3HZQ3	DY3	27.96		3HZQ4	DY3	27.15		3HZQ5	DY3	29.29
DY3N	DY3	21.68		3HZQ1	DY3	31.76		3HZQ2	DY3	28.1		3HZQ3	DY3	27.92		3HZQ4	DY3	27.13		3HZQ5	DY3	29.18
DY4N	DY4	20.72		4HZQ1	DY4	30.51		4HZQ2	DY4	27.58		4HZQ3	DY4	27.09		4HZQ4	DY4	31.09		4HZQ5	DY4	25.87
DY4N	DY4	20.7		4HZQ1	DY4	30.82		4HZQ2	DY4	27.59		4HZQ3	DY4	27.09		4HZQ4	DY4	31.7		4HZQ5	DY4	25.9
DY4N	DY4	20.73		4HZQ1	DY4	30.46		4HZQ2	DY4	27.57		4HZQ3	DY4	27.1		4HZQ4	DY4	31.24		4HZQ5	DY4	25.92
DY5N	DY5	20.69		5HZQ1	DY5	32.73		5HZQ2	DY5	31.21		5HZQ3	DY5	27.09		5HZQ4	DY5	31.35		5HZQ5	DY5	25.1
DY5N	DY5	20.68		5HZQ1	DY5	34.53		5HZQ2	DY5	30.25		5HZQ3	DY5	27.09		5HZQ4	DY5	31.4		5HZQ5	DY5	25.32
DY5N	DY5	20.74		5HZQ1	DY5	32.89		5HZQ2	DY5	30.4		5HZQ3	DY5	27.1		5HZQ4	DY5	31.38		5HZQ5	DY5	25.31

## Sheet: TRINITY_DN34252
reference gene					TRINITY_DN34252			BY1 was used as a control
reference gene	S_Name	Cq	average		Gene	S_Name	Cq	ΔCq	average of control	ΔΔCq	2-ΔΔCq
BY1N	BY1	20.42	20.4067		HZQ1	BY1	26.87	6.46333		-0.0166667	1.01162
BY1N	BY1	20.4	20.4067		HZQ1	BY1	26.95	6.54333		0.0633333	0.95705
BY1N	BY1	20.4	20.4067		HZQ1	BY1	26.84	6.43333	6.48	-0.0466667	1.03288
BY2N	BY2	21.05	21.0233		2HZQ1	BY2	29.53	8.50667		2.02667	0.245421
BY2N	BY2	21.02	21.0233		2HZQ1	BY2	29.55	8.52667		2.04667	0.242043
BY2N	BY2	21	21.0233		2HZQ1	BY2	30.34	9.31667		2.83667	0.139984
BY3N	BY3	21.73	21.75		3HZQ1	BY3	31.35	9.6		3.12	0.115023
BY3N	BY3	21.76	21.75		3HZQ1	BY3	31.49	9.74		3.26	0.104386
BY3N	BY3	21.76	21.75		3HZQ1	BY3	31.24	9.49		3.01	0.124137
BY4N	BY4	20.2	20.23		4HZQ1	BY4	32.94	12.71		6.23	0.0133224
BY4N	BY4	20.26	20.23		4HZQ1	BY4	32.95	12.72		6.24	0.0132304
BY4N	BY4	20.23	20.23		4HZQ1	BY4	32.97	12.74		6.26	0.0130482
BY5N	BY5	21.08	21.0767		5HZQ1	BY5	31.49	10.4133		3.93333	0.0654559
BY5N	BY5	21.07	21.0767		5HZQ1	BY5	31.45	10.3733		3.89333	0.0672961
BY5N	BY5	21.08	21.0767		5HZQ1	BY5	31.57	10.4933		4.01333	0.061925
reference gene					TRINITY_DN34252			BY1 was used as a control
reference gene	S_Name	Cq	average		Gene	S_Name	Cq	ΔCq	average of control	ΔΔCq	2-ΔΔCq
DY1N	DY1	19.24	19.2333		HZQ1	DY1	23.1	3.86667		-0.0566667	1.04006
DY1N	DY1	19.23	19.2333		HZQ1	DY1	23.25	4.01667		0.0933333	0.937354
DY1N	DY1	19.23	19.2333		HZQ1	DY1	23.12	3.88667	3.92333	-0.0366667	1.02574
DY2N	DY2	20.92	20.94		2HZQ1	DY2	27.82	6.88		2.95667	0.128812
DY2N	DY2	20.93	20.94		2HZQ1	DY2	27.96	7.02		3.09667	0.116899
DY2N	DY2	20.97	20.94		2HZQ1	DY2	27.84	6.9		2.97667	0.127038
DY3N	DY3	21.69	21.69		3HZQ1	DY3	31.75	10.06		6.13667	0.0142128
DY3N	DY3	21.7	21.69		3HZQ1	DY3	32.85	11.16		7.23667	0.0066305
DY3N	DY3	21.68	21.69		3HZQ1	DY3	31.76	10.07		6.14667	0.0141146
DY4N	DY4	20.72	20.7167		4HZQ1	DY4	30.51	9.79333		5.87	0.0170983
DY4N	DY4	20.7	20.7167		4HZQ1	DY4	30.82	10.1033		6.18	0.0137922
DY4N	DY4	20.73	20.7167		4HZQ1	DY4	30.46	9.74333		5.82	0.0177013
DY5N	DY5	20.69	20.7033		5HZQ1	DY5	32.73	12.0267		8.10333	0.00363625
DY5N	DY5	20.68	20.7033		5HZQ1	DY5	34.53	13.8267		9.90333	0.00104424
DY5N	DY5	20.74	20.7033		5HZQ1	DY5	32.89	12.1867		8.26333	0.00325453

## Sheet: TRINITY_DN15420
reference gene					TRINITY_DN15420			BY1 was used as a control
reference gene	S_Name	Cq	average		Gene	S_Name	Cq	ΔCq	average of control	ΔΔCq	2-ΔΔCq
BY1N	BY1	20.42	20.4067		HZQ1	BY1	25.38	4.97333		-0.01	1.00696
BY1N	BY1	20.4	20.4067		HZQ1	BY1	25.42	5.01333		0.03	0.97942
BY1N	BY1	20.4	20.4067		HZQ1	BY1	25.37	4.96333	4.98333	-0.02	1.01396
BY2N	BY2	21.05	21.0233		2HZQ1	BY2	26.42	5.39667		0.413333	0.750886
BY2N	BY2	21.02	21.0233		2HZQ1	BY2	26.79	5.76667		0.783333	0.581023
BY2N	BY2	21	21.0233		2HZQ1	BY2	26.77	5.74667		0.763333	0.589134
BY3N	BY3	21.73	21.75		3HZQ1	BY3	31.23	9.48		4.49667	0.0442964
BY3N	BY3	21.76	21.75		3HZQ1	BY3	31.13	9.38		4.39667	0.0474757
BY3N	BY3	21.76	21.75		3HZQ1	BY3	30.54	8.79		3.80667	0.0714627
BY4N	BY4	20.2	20.23		4HZQ1	BY4	30.27	10.04		5.05667	0.0300463
BY4N	BY4	20.26	20.23		4HZQ1	BY4	29.5	9.27		4.28667	0.0512371
BY4N	BY4	20.23	20.23		4HZQ1	BY4	30.28	10.05		5.06667	0.0298388
BY5N	BY5	21.08	21.0767		5HZQ1	BY5	27.41	6.33333		1.35	0.392292
BY5N	BY5	21.07	21.0767		5HZQ1	BY5	28.02	6.94333		1.96	0.257028
BY5N	BY5	21.08	21.0767		5HZQ1	BY5	27.79	6.71333		1.73	0.301452
reference gene					TRINITY_DN15420			BY1 was used as a control
reference gene	S_Name	Cq	average		Gene	S_Name	Cq	ΔCq	average of control	ΔΔCq	2-ΔΔCq
BY1N	DY1	19.24	19.2333		HZQ1	DY1	22.07	2.83667		0.176667	0.884745
BY1N	DY1	19.23	19.2333		HZQ1	DY1	21.69	2.45667		-0.203333	1.15136
BY1N	DY1	19.23	19.2333		HZQ1	DY1	21.92	2.68667	2.66	0.0266667	0.981686
BY2N	DY2	20.92	20.94		2HZQ1	DY2	25.6	4.66		2	0.25
BY2N	DY2	20.93	20.94		2HZQ1	DY2	25.58	4.64		1.98	0.25349
BY2N	DY2	20.97	20.94		2HZQ1	DY2	25.7	4.76		2.1	0.233258
BY3N	DY3	21.69	21.69		3HZQ1	DY3	28.13	6.44		3.78	0.0727958
BY3N	DY3	21.7	21.69		3HZQ1	DY3	28.21	6.52		3.86	0.0688691
BY3N	DY3	21.68	21.69		3HZQ1	DY3	28.1	6.41		3.75	0.0743254
BY4N	DY4	20.72	20.7167		4HZQ1	DY4	27.58	6.86333		4.20333	0.0542838
BY4N	DY4	20.7	20.7167		4HZQ1	DY4	27.59	6.87333		4.21333	0.0539089
BY4N	DY4	20.73	20.7167		4HZQ1	DY4	27.57	6.85333		4.19333	0.0546614
BY5N	DY5	20.69	20.7033		5HZQ1	DY5	31.21	10.5067		7.84667	0.00434428
BY5N	DY5	20.68	20.7033		5HZQ1	DY5	30.25	9.54667		6.88667	0.00845097
BY5N	DY5	20.74	20.7033		5HZQ1	DY5	30.4	9.69667		7.03667	0.00761644

## Sheet: Pepsico2_Contig6346
reference gene					Pepsico2_Contig6346			BY1 was used as a control
reference gene	S_Name	Cq	average		Gene	S_Name	Cq	ΔCq	average of control	ΔΔCq	2-ΔΔCq
BY1N	BY1	20.42	20.4067		HZQ1	BY1	31.45	11.0433		0.143333	0.905425
BY1N	BY1	20.4	20.4067		HZQ1	BY1	31.29	10.8833		-0.0166667	1.01162
BY1N	BY1	20.4	20.4067		HZQ1	BY1	31.18	10.7733	10.9	-0.126667	1.09177
BY2N	BY2	21.05	21.0233		2HZQ1	BY2	26.4	5.37667		-5.52333	45.9927
BY2N	BY2	21.02	21.0233		2HZQ1	BY2	26.39	5.36667		-5.53333	46.3126
BY2N	BY2	21	21.0233		2HZQ1	BY2	26.5	5.47667		-5.42333	42.9127
BY3N	BY3	21.73	21.75		3HZQ1	BY3	26.32	4.57		-6.33	80.4489
BY3N	BY3	21.76	21.75		3HZQ1	BY3	26.19	4.44		-6.46	88.0347
BY3N	BY3	21.76	21.75		3HZQ1	BY3	26.24	4.49		-6.41	85.0359
BY4N	BY4	20.2	20.23		4HZQ1	BY4	24.96	4.73		-6.17	72.0037
BY4N	BY4	20.26	20.23		4HZQ1	BY4	25.03	4.8		-6.1	68.5935
BY4N	BY4	20.23	20.23		4HZQ1	BY4	25.05	4.82		-6.08	67.6492
BY5N	BY5	21.08	21.0767		5HZQ1	BY5	25.7	4.62333		-6.27667	77.5291
BY5N	BY5	21.07	21.0767		5HZQ1	BY5	25.62	4.54333		-6.35667	81.9497
BY5N	BY5	21.08	21.0767		5HZQ1	BY5	25.66	4.58333		-6.31667	79.7088
reference gene					Pepsico2_Contig6346			BY1 was used as a control
reference gene	S_Name	Cq	average		Gene	S_Name	Cq	ΔCq	average of control	ΔΔCq	2-ΔΔCq
BY1N	DY1	19.24	19.2333		HZQ1	DY1	29.21	9.97667		-0.02	1.01396
BY1N	DY1	19.23	19.2333		HZQ1	DY1	29.31	10.0767		0.08	0.946058
BY1N	DY1	19.23	19.2333		HZQ1	DY1	29.17	9.93667	9.99667	-0.06	1.04247
BY2N	DY2	20.92	20.94		2HZQ1	DY2	28.38	7.44		-2.55667	5.88347
BY2N	DY2	20.93	20.94		2HZQ1	DY2	27.92	6.98		-3.01667	8.09296
BY2N	DY2	20.97	20.94		2HZQ1	DY2	28.37	7.43		-2.56667	5.92439
BY3N	DY3	21.69	21.69		3HZQ1	DY3	27.81	6.12		-3.87667	14.689
BY3N	DY3	21.7	21.69		3HZQ1	DY3	27.96	6.27		-3.72667	13.2385
BY3N	DY3	21.68	21.69		3HZQ1	DY3	27.92	6.23		-3.76667	13.6107
BY4N	DY4	20.72	20.7167		4HZQ1	DY4	27.09	6.37333		-3.62333	12.3234
BY4N	DY4	20.7	20.7167		4HZQ1	DY4	27.09	6.37333		-3.62333	12.3234
BY4N	DY4	20.73	20.7167		4HZQ1	DY4	27.1	6.38333		-3.61333	12.2383
BY5N	DY5	20.69	20.7033		5HZQ1	DY5	27.09	6.38667		-3.61	12.2101
BY5N	DY5	20.68	20.7033		5HZQ1	DY5	27.09	6.38667		-3.61	12.2101
BY5N	DY5	20.74	20.7033		5HZQ1	DY5	27.1	6.39667		-3.6	12.1257

## Sheet: TRINITY_DN34723
reference gene					TRINITY_DN34723			BY1 was used as a control
reference gene	S_Name	Cq	average		Gene	S_Name	Cq	ΔCq	average of control	ΔΔCq	2-ΔΔCq
BY1N	BY1	20.42	20.4067		HZQ1	BY1	20.33	-0.0766667		-0.0633333	1.04488
BY1N	BY1	20.4	20.4067		HZQ1	BY1	20.37	-0.0366667		-0.0233333	1.0163
BY1N	BY1	20.4	20.4067		HZQ1	BY1	20.48	0.0733333	-0.0133333	0.0866667	0.941696
BY2N	BY2	21.05	21.0233		2HZQ1	BY2	25.18	4.15667		4.17	0.0555527
BY2N	BY2	21.02	21.0233		2HZQ1	BY2	25.25	4.22667		4.24	0.0529216
BY2N	BY2	21	21.0233		2HZQ1	BY2	25.23	4.20667		4.22	0.0536603
BY3N	BY3	21.73	21.75		3HZQ1	BY3	25.35	3.6		3.61333	0.0817106
BY3N	BY3	21.76	21.75		3HZQ1	BY3	25.19	3.44		3.45333	0.0912942
BY3N	BY3	21.76	21.75		3HZQ1	BY3	25.16	3.41		3.42333	0.0932125
BY4N	BY4	20.2	20.23		4HZQ1	BY4	27.5	7.27		7.28333	0.00641946
BY4N	BY4	20.26	20.23		4HZQ1	BY4	27.37	7.14		7.15333	0.00702477
BY4N	BY4	20.23	20.23		4HZQ1	BY4	27.4	7.17		7.18333	0.0068802
BY5N	BY5	21.08	21.0767		5HZQ1	BY5	30.3	9.22333		9.23667	0.00165762
BY5N	BY5	21.07	21.0767		5HZQ1	BY5	30.32	9.24333		9.25667	0.0016348
BY5N	BY5	21.08	21.0767		5HZQ1	BY5	30.21	9.13333		9.14667	0.00176433
reference gene					TRINITY_DN34723			BY1 was used as a control
reference gene	S_Name	Cq	average		Gene	S_Name	Cq	ΔCq	average of control	ΔΔCq	2-ΔΔCq
BY1N	DY1	19.24	19.2333		HZQ1	DY1	19.68	0.446667		0.0633333	0.95705
BY1N	DY1	19.23	19.2333		HZQ1	DY1	19.86	0.626667		0.243333	0.844791
BY1N	DY1	19.23	19.2333		HZQ1	DY1	19.31	0.0766667	0.383333	-0.306667	1.23685
BY2N	DY2	20.92	20.94		2HZQ1	DY2	19.68	-1.26		-1.64333	3.12387
BY2N	DY2	20.93	20.94		2HZQ1	DY2	19.86	-1.08		-1.46333	2.75745
BY2N	DY2	20.97	20.94		2HZQ1	DY2	19.31	-1.63		-2.01333	4.03714
BY3N	DY3	21.69	21.69		3HZQ1	DY3	27.11	5.42		5.03667	0.0304658
BY3N	DY3	21.7	21.69		3HZQ1	DY3	27.15	5.46		5.07667	0.0296327
BY3N	DY3	21.68	21.69		3HZQ1	DY3	27.13	5.44		5.05667	0.0300463
BY4N	DY4	20.72	20.7167		4HZQ1	DY4	31.09	10.3733		9.99	0.000983355
BY4N	DY4	20.7	20.7167		4HZQ1	DY4	31.7	10.9833		10.6	0.000644291
BY4N	DY4	20.73	20.7167		4HZQ1	DY4	31.24	10.5233		10.14	0.000886249
BY5N	DY5	20.69	20.7033		5HZQ1	DY5	31.35	10.6467		10.2633	0.000813633
BY5N	DY5	20.68	20.7033		5HZQ1	DY5	31.4	10.6967		10.3133	0.000785918
BY5N	DY5	20.74	20.7033		5HZQ1	DY5	31.38	10.6767		10.2933	0.000796889

## Sheet: Pepsico1_Contig10341
reference gene					Pepsico1_Contig10341			BY1 was used as a control
reference gene	S_Name	Cq	average		Gene	S_Name	Cq	ΔCq	average of control	ΔΔCq	2-ΔΔCq
BY1N	BY1	20.42	20.4067		HZQ1	BY1	30.46	10.0533		0.51	0.702222
BY1N	BY1	20.4	20.4067		HZQ1	BY1	29.7	9.29333		-0.25	1.18921
BY1N	BY1	20.4	20.4067		HZQ1	BY1	29.69	9.28333	9.54333	-0.26	1.19748
BY2N	BY2	21.05	21.0233		2HZQ1	BY2	30.46	9.43667		-0.106667	1.07674
BY2N	BY2	21.02	21.0233		2HZQ1	BY2	29.7	8.67667		-0.866667	1.82344
BY2N	BY2	21	21.0233		2HZQ1	BY2	29.69	8.66667		-0.876667	1.83613
BY3N	BY3	21.73	21.75		3HZQ1	BY3	27.19	5.44		-4.10333	17.188
BY3N	BY3	21.76	21.75		3HZQ1	BY3	26.95	5.2		-4.34333	20.299
BY3N	BY3	21.76	21.75		3HZQ1	BY3	26.75	5		-4.54333	23.3174
BY4N	BY4	20.2	20.23		4HZQ1	BY4	25.17	4.94		-4.60333	24.3076
BY4N	BY4	20.26	20.23		4HZQ1	BY4	25.23	5		-4.54333	23.3174
BY4N	BY4	20.23	20.23		4HZQ1	BY4	25.26	5.03		-4.51333	22.8375
BY5N	BY5	21.08	21.0767		5HZQ1	BY5	25.73	4.65333		-4.89	29.6508
BY5N	BY5	21.07	21.0767		5HZQ1	BY5	25.66	4.58333		-4.96	31.125
BY5N	BY5	21.08	21.0767		5HZQ1	BY5	25.54	4.46333		-5.08	33.8246
reference gene					Pepsico1_Contig10341			BY1 was used as a control
reference gene	S_Name	Cq	average		Gene	S_Name	Cq	ΔCq	average of control	ΔΔCq	2-ΔΔCq
BY1N	DY1	19.24	19.2333		HZQ1	DY1	25.07	5.83667		-0.29	1.22264
BY1N	DY1	19.23	19.2333		HZQ1	DY1	25.28	6.04667		-0.08	1.05702
BY1N	DY1	19.23	19.2333		HZQ1	DY1	25.73	6.49667	6.12667	0.37	0.773782
BY2N	DY2	20.92	20.94		2HZQ1	DY2	31.3	10.36		4.23333	0.0531667
BY2N	DY2	20.93	20.94		2HZQ1	DY2	30.21	9.27		3.14333	0.113178
BY2N	DY2	20.97	20.94		2HZQ1	DY2	30.23	9.29		3.16333	0.11162
BY3N	DY3	21.69	21.69		3HZQ1	DY3	29.21	7.52		1.39333	0.380684
BY3N	DY3	21.7	21.69		3HZQ1	DY3	29.29	7.6		1.47333	0.360149
BY3N	DY3	21.68	21.69		3HZQ1	DY3	29.18	7.49		1.36333	0.388683
BY4N	DY4	20.72	20.7167		4HZQ1	DY4	25.87	5.15333		-0.973333	1.96337
BY4N	DY4	20.7	20.7167		4HZQ1	DY4	25.9	5.18333		-0.943333	1.92297
BY4N	DY4	20.73	20.7167		4HZQ1	DY4	25.92	5.20333		-0.923333	1.89649
BY5N	DY5	20.69	20.7033		5HZQ1	DY5	25.1	4.39667		-1.73	3.31728
BY5N	DY5	20.68	20.7033		5HZQ1	DY5	25.32	4.61667		-1.51	2.8481
BY5N	DY5	20.74	20.7033		5HZQ1	DY5	25.31	4.60667		-1.52	2.86791

## Sheet: FPKM
gene_id	TRINITY_DN34252_c0_g1_i1.path1	TRINITY_DN15420_c0_g1_i4.path1	Pepsico2_Contig6346.path1	TRINITY_DN14454_c0_g2_i2.path1	Pepsico1_Contig10341.path1
BY1_1_fpkm	43.7232	21.3641	0.361434	16.7495	1.26713
BY1_2_fpkm	37.2718	46.7064	0.312383	24.1728	0.951063
BY1_3_fpkm	31.7521	62.7256	0.840383	23.8077	0.558235
BY2_1_fpkm	9.41735	13.0991	3.9608	9.48618	0.571959
BY2_2_fpkm	5.29506	20.5919	5.59177	11.1755	0.982646
BY2_3_fpkm	8.38197	39.4219	1.07293	13.2679	0.763613
BY3_1_fpkm	6.58483	1.88909	8.74193	10.7707	6.15887
BY3_2_fpkm	0	8.10292	5.30029	9.26885	2.41623
BY3_3_fpkm	1.70334	12.4609	3.3406	11.6837	4.07772
BY4_1_fpkm	0	1.33775	6.45538	10.4204	10.8118
BY4_2_fpkm	3.8298	5.85981	6.39401	14.1452	10.2345
BY4_3_fpkm	5.72881	6.49579	5.67943	10.1478	9.47715
BY5_1_fpkm	0	0.633786	4.66598	8.96098	19.8327
BY5_2_fpkm	2.29368	3.36323	4.07546	13.5143	16.6857
BY5_3_fpkm	4.35362	8.04905	7.29774	15.6971	9.77603
DY1_1_fpkm	40.6191	35.9065	0.0996404	21.0402	1.70984
DY1_2_fpkm	178.035	116.751	0.294341	24.7069	4.01903
DY1_3_fpkm	83.6724	136.867	1.26546	27.0535	3.71265
DY2_1_fpkm	7.84471	10.2524	0.986224	15.5219	1.01906
DY2_2_fpkm	60.1519	87.7534	0.873854	19.9247	2.38141
DY2_3_fpkm	32.9571	54.2209	1.42056	18.6315	1.19826
DY3_1_fpkm	13.6961	12.558	4.37551	17.2162	5.65151
DY3_2_fpkm	4.99803	7.52778	2.76472	12.1968	1.9478
DY3_3_fpkm	21.4613	51.3077	2.5182	11.3238	3.50481
DY4_1_fpkm	0.816165	1.71707	2.873	17.4409	8.17896
DY4_2_fpkm	2.02075	5.31412	2.43883	11.995	7.08761
DY4_3_fpkm	0	7.50587	2.72534	13.5582	6.13853
DY5_1_fpkm	4.30121	1.64527	6.22935	12.2552	15.8046
DY5_2_fpkm	3.46774	4.97421	2.35417	13.4941	9.94262
DY5_3_fpkm	0	4.09819	4.15623	11.1042	9.96965

## Sheet: Repeatability test
Reletive expression										TRINITY_DN34252					TRINITY_DN15420					Pepsico2_Contig6346					TRINITY_DN34723					Pepsico1_Contig10341
VAR00003										periods	FPKM	SD	Reletive expression	SD	periods	FPKM	SD	Reletive expression	SD	periods	FPKM	SD	Reletive expression	SD	periods	FPKM	SD	Reletive expression	SD	periods	FPKM	SD	Reletive expression	SD
	Number of cases	Average value	Standard Deviation	Standard Error	95% confidence interval for the mean		Minimum	Maximum		BY1	37.5824	5.99161	1.00052	0.0391133	BY1	43.5987	20.8551	1.00011	0.0182583	BY1	0.504733	0.291714	1.00294	0.0934746	BY1	21.5767	4.18447	1.00096	0.0532748	BY1	0.925475	0.355138	1.02964	0.283579
					Lower limit	Upper Limit				BY2	7.69813	2.14454	0.209149	0.0599228	BY2	24.371	13.5622	0.640348	0.0958153	BY2	3.54183	2.28837	45.0727	1.87741	BY2	11.3099	1.89445	0.0540449	0.00135704	BY2	0.772739	0.205496	1.57877	0.434819
6.00	3	1.00052	0.0391133	0.0225821	0.903352	1.09768	0.95705	1.03288		BY3	2.76272	3.41785	0.114515	0.00988509	BY3	7.4843	5.31298	0.0544116	0.014852	BY3	5.79427	2.73434	84.5065	3.82052	BY3	10.5744	1.21933	0.0887391	0.00616196	BY3	4.21761	1.87524	20.2681	3.06478
7.00	3	0.209149	0.0599228	0.0345965	0.0602928	0.358006	0.139984	0.245421		BY4	3.18621	2.91813	0.0132004	0.000139532	BY4	4.56445	2.81244	0.0370408	0.0122949	BY4	6.17627	0.431371	69.4155	2.29071	BY4	11.5712	2.2334	0.00677481	0.00031612	BY4	10.1745	0.669343	23.4875	0.749645
8.00	3	0.114515	0.00988509	0.00570716	0.0899594	0.139071	0.104386	0.124137		BY5	2.21577	2.17786	0.0648923	0.00272952	BY5	4.01535	3.7504	0.316924	0.0689464	BY5	5.34639	1.71552	79.7292	2.21035	BY5	12.7241	3.43687	0.00168559	6.91403e-05	BY5	15.4315	5.14431	31.5335	2.11665
9.00	3	0.0132004	0.000139532	8.0559e-05	0.0128537	0.013547	0.0130482	0.0133224		DY1	100.775	70.2861	1.00105	0.0556262	DY1	96.508	53.4376	1.00593	0.134948	DY1	0.553148	0.624516	1.00083	0.0495274	DY1	24.2669	3.03075	1.0129	0.201906	DY1	3.14717	1.25415	1.01781	0.226983
10.00	3	0.0648923	0.00272952	0.00157589	0.0581118	0.0716728	0.061925	0.0672961		DY2	33.6512	26.1605	0.12425	0.00642727	DY2	50.7423	38.8674	0.245583	0.010815	DY2	1.09355	0.288724	6.6336	1.264	DY2	18.026	2.26299	3.30615	0.659032	DY2	1.53291	0.740264	0.0926549	0.0342067
11.00	3	1.00011	0.0182583	0.0105415	0.954756	1.04547	0.97942	1.01396		DY3	13.3851	8.23602	0.0116526	0.00434957	DY3	23.7978	23.9566	0.0719968	0.00281458	DY3	3.21948	1.00871	13.8461	0.753371	DY3	13.5789	3.18007	0.0300483	0.000416548	DY3	3.70137	1.85966	0.376506	0.0147188
12.00	3	0.640348	0.0958153	0.055319	0.402329	0.878366	0.581023	0.750886		DY4	0.945637	1.01658	0.0161973	0.00210455	DY4	4.84569	2.92269	0.0542847	0.000376271	DY4	2.67906	0.220752	12.2951	0.0491465	DY4	14.3314	2.80407	0.000837965	0.000174613	DY4	7.13503	1.02104	1.92761	0.0336808
13.00	3	0.0544116	0.014852	0.00857479	0.0175172	0.0913059	0.0442964	0.0714627		DY5	2.58965	2.28109	0.00264501	0.00139938	DY5	3.57256	1.72559	0.0068039	0.00217058	DY5	4.24658	1.93916	12.182	0.0486944	DY5	12.2845	1.19525	0.000798813	1.39573e-05	DY5	11.9056	3.37662	3.0111	0.265346
14.00	3	0.0370408	0.0122949	0.00709844	0.00649865	0.0675829	0.0298388	0.0512371
15.00	3	0.316924	0.0689464	0.0398062	0.145652	0.488196	0.257028	0.392292
16.00	3	1.00294	0.0934746	0.0539676	0.770734	1.23514	0.905425	1.09177
17.00	3	45.0727	1.87741	1.08392	40.4089	49.7364	42.9127	46.3126
18.00	3	84.5065	3.82052	2.20578	75.0158	93.9972	80.4489	88.0347
19.00	3	69.4155	2.29071	1.32254	63.725	75.1059	67.6492	72.0037
20.00	3	79.7292	2.21035	1.27615	74.2384	85.22	77.5291	81.9497
21.00	3	1.00096	0.0532748	0.0307582	0.868617	1.1333	0.941696	1.04488
22.00	3	0.0540449	0.00135704	0.000783485	0.0506738	0.0574159	0.0529216	0.0555527
23.00	3	0.0887391	0.00616196	0.00355761	0.0734319	0.104046	0.0817106	0.0932125
24.00	3	0.00677481	0.00031612	0.000182512	0.00598952	0.0075601	0.00641946	0.00702477
25.00	3	0.00168559	6.91403e-05	3.99182e-05	0.00151383	0.00185734	0.0016348	0.00176433
26.00	3	1.02964	0.283579	0.163724	0.325188	1.73408	0.702222	1.19748
27.00	3	1.57877	0.434819	0.251043	0.498619	2.65892	1.07674	1.83613
28.00	3	20.2681	3.06478	1.76945	12.6548	27.8815	17.188	23.3174
29.00	3	23.4875	0.749645	0.432808	21.6253	25.3497	22.8375	24.3076
30.00	3	31.5335	2.11665	1.22205	26.2754	36.7915	29.6508	33.8246
36.00	3	1.00105	0.0556262	0.0321158	0.862869	1.13923	0.937354	1.04006
37.00	3	0.12425	0.00642727	0.00371078	0.108283	0.140216	0.116899	0.128812
38.00	3	0.0116526	0.00434957	0.00251123	0.000847697	0.0224576	0.0066305	0.0142128
39.00	3	0.0161973	0.00210455	0.00121506	0.0109693	0.0214253	0.0137922	0.0177013
40.00	3	0.00264501	0.00139938	0.000807934	-0.000831253	0.00612127	0.00104424	0.00363625
41.00	3	1.00593	0.134948	0.0779126	0.670698	1.34116	0.884745	1.15136
42.00	3	0.245583	0.010815	0.00624404	0.218717	0.272449	0.233258	0.25349
43.00	3	0.0719968	0.00281458	0.001625	0.065005	0.0789886	0.0688691	0.0743254
44.00	3	0.0542847	0.000376271	0.00021724	0.05335	0.0552194	0.0539089	0.0546614
45.00	3	0.0068039	0.00217058	0.00125318	0.00141189	0.0121959	0.00434428	0.00845097
46.00	3	1.00083	0.0495274	0.0285947	0.877795	1.12386	0.946058	1.04247
47.00	3	6.6336	1.264	0.729771	3.49365	9.77356	5.88347	8.09296
48.00	3	13.8461	0.753371	0.434959	11.9746	15.7175	13.2385	14.689
49.00	3	12.2951	0.0491465	0.0283747	12.173	12.4172	12.2383	12.3234
50.00	3	12.182	0.0486944	0.0281137	12.061	12.3029	12.1257	12.2101
51.00	3	1.0129	0.201906	0.11657	0.511334	1.51446	0.844791	1.23685
52.00	3	3.30615	0.659032	0.380492	1.66902	4.94328	2.75745	4.03714
53.00	3	0.0300483	0.000416548	0.000240494	0.0290135	0.031083	0.0296327	0.0304658
54.00	3	0.000837965	0.000174613	0.000100813	0.000404203	0.00127173	0.000644291	0.000983355
55.00	3	0.000798813	1.39573e-05	8.05828e-06	0.000764141	0.000833485	0.000785918	0.000813633
56.00	3	1.01781	0.226983	0.131048	0.453958	1.58167	0.773782	1.22264
57.00	3	0.0926549	0.0342067	0.0197492	0.00768084	0.177629	0.0531667	0.113178
58.00	3	0.376506	0.0147188	0.0084979	0.339942	0.413069	0.360149	0.388683
59.00	3	1.92761	0.0336808	0.0194456	1.84394	2.01128	1.89649	1.96337
60.00	3	3.0111	0.265346	0.153198	2.35194	3.67025	2.8481	3.31728
总计	180	10.4879	0.422946	1.38594	7.75297	13.2228	0.000644291	88.0347
FPKM
VAR00005
	Number of cases	Average value	Standard Deviation	Standard Error	95% confidence interval for the mean		Minimum	Maximum
					Lower limit	Upper Limit
1.00	3	37.5824	5.99161	3.45926	22.6984	52.4663	31.7521	43.7232
2.00	3	7.69813	2.14454	1.23815	2.3708	13.0255	5.29506	9.41735
3.00	3	2.76272	3.41785	1.9733	-5.72769	11.2531	0	6.58483
4.00	3	3.18621	2.91813	1.68478	-4.06283	10.4352	0	5.72881
5.00	3	2.21577	2.17786	1.25739	-3.19433	7.62587	0	4.35362
6.00	3	100.775	70.2861	40.5797	-73.8249	275.376	40.6191	178.035
7.00	3	33.6512	26.1605	15.1038	-31.335	98.6375	7.84471	60.1519
8.00	3	13.3851	8.23602	4.75507	-7.07429	33.8445	4.99803	21.4613
9.00	3	0.945637	1.01658	0.58692	-1.57968	3.47095	0	2.02075
10.00	3	2.58965	2.28109	1.31699	-3.0769	8.2562	0	4.30121
11.00	3	43.5987	20.8551	12.0407	-8.20833	95.4058	21.3641	62.7256
12.00	3	24.371	13.5622	7.83013	-9.31935	58.0613	13.0991	39.4219
13.00	3	7.4843	5.31298	3.06745	-5.71388	20.6825	1.88909	12.4609
14.00	3	4.56445	2.81244	1.62376	-2.42204	11.5509	1.33775	6.49579
15.00	3	4.01535	3.7504	2.16529	-5.30115	13.3319	0.633786	8.04905
16.00	3	96.508	53.4376	30.8522	-36.2383	229.254	35.9065	136.867
17.00	3	50.7423	38.8674	22.4401	-45.8098	147.294	10.2524	87.7534
18.00	3	23.7978	23.9566	13.8314	-35.7137	83.3094	7.52778	51.3077
19.00	3	4.84569	2.92269	1.68742	-2.41468	12.1061	1.71707	7.50587
20.00	3	3.57256	1.72559	0.996272	-0.714055	7.85917	1.64527	4.97421
21.00	3	0.504733	0.291714	0.168421	-0.219924	1.22939	0.312383	0.840383
22.00	3	3.54183	2.28837	1.32119	-2.14279	9.22645	1.07293	5.59177
23.00	3	5.79427	2.73434	1.57867	-0.998199	12.5867	3.3406	8.74193
24.00	3	6.17627	0.431371	0.249052	5.10469	7.24786	5.67943	6.45538
25.00	3	5.34639	1.71552	0.990455	1.08481	9.60798	4.07546	7.29774
26.00	3	0.553148	0.624516	0.360565	-0.998237	2.10453	0.0996404	1.26546
27.00	3	1.09355	0.288724	0.166695	0.376317	1.81078	0.873854	1.42056
28.00	3	3.21948	1.00871	0.582382	0.713692	5.72526	2.5182	4.37551
29.00	3	2.67906	0.220752	0.127451	2.13068	3.22744	2.43883	2.873
30.00	3	4.24658	1.93916	1.11958	-0.57057	9.06373	2.35417	6.22935
31.00	3	21.5767	4.18447	2.4159	11.1819	31.9715	16.7495	24.1728
32.00	3	11.3099	1.89445	1.09376	6.60379	16.016	9.48618	13.2679
33.00	3	10.5744	1.21933	0.703979	7.54543	13.6034	9.26885	11.6837
34.00	3	11.5712	2.2334	1.28945	6.02308	17.1192	10.1478	14.1452
35.00	3	12.7241	3.43687	1.98428	4.18645	21.2618	8.96098	15.6971
36.00	3	24.2669	3.03075	1.74981	16.7381	31.7957	21.0402	27.0535
37.00	3	18.026	2.26299	1.30654	12.4044	23.6476	15.5219	19.9247
38.00	3	13.5789	3.18007	1.83602	5.67921	21.4787	11.3238	17.2162
39.00	3	14.3314	2.80407	1.61893	7.3657	21.2971	11.995	17.4409
40.00	3	12.2845	1.19525	0.690077	9.31533	15.2537	11.1042	13.4941
41.00	3	0.925475	0.355138	0.205039	0.0432632	1.80769	0.558235	1.26713
42.00	3	0.772739	0.205496	0.118643	0.26226	1.28322	0.571959	0.982646
43.00	3	4.21761	1.87524	1.08267	-0.440752	8.87596	2.41623	6.15887
44.00	3	10.1745	0.669343	0.386446	8.51173	11.8372	9.47715	10.8118
45.00	3	15.4315	5.14431	2.97007	2.65231	28.2107	9.77603	19.8327
46.00	3	3.14717	1.25415	0.724087	0.031679	6.26267	1.70984	4.01903
47.00	3	1.53291	0.740264	0.427392	-0.306008	3.37183	1.01906	2.38141
48.00	3	3.70137	1.85966	1.07368	-0.918283	8.32103	1.9478	5.65151
49.00	3	7.13503	1.02104	0.589499	4.59862	9.67144	6.13853	8.17896
50.00	3	11.9056	3.37662	1.94949	3.51763	20.2936	9.94262	15.8046
总计	150	14.2127	24.0881	1.96679	10.3263	18.0991	0	178.035
